# Supplementary material for: Impact of Phellinus gilvus mycelia on growth, immunity and fecal microbiota in weaned piglets
Source: PeerJ. 2020 Apr 28;8:e9067. doi: 10.7717/peerj.9067 (PMC7194088; doi:10.7717/peerj.9067)
Supplement: File S2 [file peerj-08-9067-s002.xls]

## Sheet: growth parameters
		Average daily gain(ADG)			Average daily feed intake (ADFI)			Feed intake to gain ratio (F/G)
	group	1-14d	15-28d	1-28d	1-14d	15-28d	1-28d	1-14d	15-28d	1-28d
1	c	195.262	161.631	178.446	290.625	380.769	335.697	1.48839	2.35579	1.88122
1	c	211.238	232.443	221.841	325	432.877	378.938	1.53855	1.86229	1.70816
1	c	203.512	200.002	201.757	311.458	529.487	420.473	1.53042	2.64741	2.08406
1	c	155.845	231.965	193.905	308.333	510.256	409.295	1.97846	2.19971	2.1108
2	ATB	242.976	216.051	229.514	305.208	540	422.604	1.25612	2.49941	1.8413
2	ATB	210.443	245.005	227.724	250	547.436	398.718	1.18797	2.23439	1.75088
2	ATB	220.157	305.019	262.588	351.042	582.051	466.546	1.5945	1.90824	1.77672
2	ATB	238.31	240.626	239.468	314.844	552.564	433.704	1.32116	2.29636	1.81112
3	SH	205.371	278.722	242.047	277.083	471.795	374.439	1.34918	1.69271	1.54697
3	SH	194.298	261.496	227.897	315.625	493.59	404.607	1.62444	1.88756	1.7754
3	SH	232.833	306.019	269.426	352.083	581.538	466.811	1.51217	1.90034	1.73261
3	SH	194.298	261.496	227.897	313.542	520.513	417.027	1.61372	1.99052	1.8299

## Sheet: immunological parameters
group	IgG	MPO	IL-1B	TNF-a
c	19.982	33.987	20.911	51.908
c	20.884	24.786	19.692	35.602
c	19.744	42.795	25.372	63.652
c	20.814	27.654	19.782	41.166
c	19.497	38.931	23.465	47.923
c	20.988	29.407	18.439	38.758
c	21.093	30.963	19.289	40.258
c	20.044	37.443	22.709	47.096
ATB	21.441	43.994	29.255	54.715
ATB	19.471	40.704	24.492	51.248
ATB	20.606	24.61	17.471	35.387
ATB	21.577	36.06	21.997	45.569
ATB	21.058	66.13	35.292	77.494
ATB	21.577	61.915	31.077	94.023
ATB	20.953	65.44	38.365	70.011
ATB	20.335	77.466	35.036	97.098
SH	20.172	73.625	37.941	92.469
SH	20.953	54.086	30.504	67.336
SH	20.64	73.625	37.941	92.469
SH	21.441	85.375	41.575	105.345
SH	20.538	58.005	32.136	72.405
SH	22.526	49.651	28.565	61.692
SH	20.302	83.052	40.918	103.244
SH	20.71	80.921	40.282	101.014
