# Supplementary material for: Impact of Phellinus gilvus mycelia on growth, immunity and fecal microbiota in weaned piglets
Source: PeerJ. 2020 Apr 28;8:e9067. doi: 10.7717/peerj.9067 (PMC7194088; doi:10.7717/peerj.9067)
Supplement: File S3 [file peerj-08-9067-s003.xlsx]

## Sheet: immunological parameters in ser
	IgG	MPO	IL-1β	TNF-α
C	19.982	33.987	20.911	51.908
C	20.884	24.786	19.692	35.602
C	19.744	42.795	25.372	63.652
C	20.814	27.654	19.782	41.166
C	19.497	38.931	23.465	47.923
C	20.988	29.407	18.439	38.758
C	21.093	30.963	19.289	40.258
C	20.044	37.443	22.709	47.096
ATB	21.441	43.994	29.255	54.715
ATB	19.471	40.704	24.492	51.248
ATB	20.606	24.61	17.471	35.387
ATB	21.577	36.06	21.997	45.569
ATB	21.058	66.13	35.292	77.494
ATB	21.577	61.915	31.077	94.023
ATB	20.953	65.44	38.365	70.011
ATB	20.335	77.466	35.036	97.098
SH	20.172	73.625	37.941	92.469
SH	20.953	54.086	30.504	67.336
SH	20.64	73.625	37.941	92.469
SH	21.441	85.375	41.575	105.345
SH	20.538	58.005	32.136	72.405
SH	22.526	49.651	28.565	61.692
SH	20.302	83.052	40.918	103.244
SH	20.71	80.921	40.282	101.014

## Sheet: Viable plate counts of E. coli
	Escherichia coli ×105CFU/g
C	9
C	8
C	7
C	9
ATB	2
ATB	8.6
ATB	1.3
ATB	4
SH	2
SH	1
SH	1
SH	2
