# Supplementary material for: Impact of Phellinus gilvus mycelia on growth, immunity and fecal microbiota in weaned piglets
Source: PeerJ. 2020 Apr 28;8:e9067. doi: 10.7717/peerj.9067 (PMC7194088; doi:10.7717/peerj.9067)
Supplement: File S4 [file peerj-08-9067-s004.xlsx]

## Sheet: Sheet1
group	Sample	berger_parker	buzas_gibson	chao1	dominance	equitability	jost	jost1	reads	richness	robbins	simpson	shannon_e	shannon_2	shannon_10
SH	JS1	0.051	0.00485	802.1	0.982	0.722	74.6	124.5	25670	794	0.34	0.0181	4.82	6.96	2.1
SH	JS10	0.125	0.00354	740.3	0.966	0.683	45.2	91	25690	738	0.322	0.0343	4.51	6.51	1.96
SH	JS2	0.05	0.0065	853.9	0.986	0.759	101.4	166.7	25625	849	0.315	0.0137	5.12	7.38	2.22
SH	JS3	0.123	0.00394	757.8	0.971	0.697	52.3	101.1	25674	751	0.319	0.0295	4.62	6.66	2
SH	JS4	0.109	0.00348	786.3	0.97	0.675	47.5	89.3	25667	778	0.372	0.0305	4.49	6.48	1.95
SH	JS5	0.113	0.00344	692.3	0.968	0.686	46.5	88.3	25669	684	0.321	0.0316	4.48	6.46	1.95
SH	JS6	0.141	0.00428	785.1	0.969	0.706	54.5	110.1	25702	783	0.309	0.0305	4.7	6.78	2.04
SH	JS7	0.227	0.00208	654	0.93	0.614	23.1	53.5	25696	650	0.355	0.0703	3.98	5.74	1.73
SH	JS8	0.142	0.00305	816.5	0.961	0.652	39	78.7	25822	812	0.373	0.0387	4.37	6.3	1.9
SH	JS9	0.115	0.00306	769.6	0.964	0.657	40.1	78.6	25724	766	0.374	0.0364	4.36	6.3	1.9
ATB	K1	0.0735	0.00505	866.2	0.98	0.72	71.7	129.7	25697	862	0.351	0.0204	4.87	7.02	2.11
ATB	K10	0.127	0.00384	850.9	0.963	0.681	44.2	98.6	25685	848	0.347	0.037	4.59	6.62	1.99
ATB	K2	0.0501	0.00494	702.1	0.983	0.74	79.4	127	25690	699	0.321	0.017	4.84	6.99	2.1
ATB	K3	0.0637	0.00342	674.2	0.976	0.689	54.4	87.8	25697	664	0.373	0.024	4.47	6.46	1.94
ATB	K4	0.179	0.00152	566.4	0.922	0.579	18.7	39.1	25684	563	0.387	0.0776	3.67	5.29	1.59
ATB	K5	0.0756	0.00417	692.3	0.978	0.716	63.1	107.2	25691	685	0.335	0.0223	4.67	6.74	2.03
ATB	K6	0.135	0.00349	725.1	0.965	0.685	45.1	89.8	25710	711	0.365	0.0346	4.5	6.49	1.95
ATB	K7	0.0943	0.00463	751.8	0.978	0.722	66	118.8	25658	745	0.302	0.0222	4.78	6.89	2.07
ATB	K8	0.23	0.00253	744.1	0.932	0.632	25.4	65	25733	740	0.332	0.068	4.17	6.02	1.81
ATB	K9	0.238	0.00325	737.2	0.936	0.673	30.5	83.6	25700	721	0.331	0.0642	4.43	6.39	1.92
C	WK1	0.057	0.00544	801.3	0.984	0.739	84.9	139.7	25697	797	0.342	0.0162	4.94	7.13	2.15
C	WK10	0.171	0.00356	852.1	0.958	0.67	40.3	91.9	25786	849	0.335	0.0421	4.52	6.52	1.96
C	WK2	0.0628	0.00544	912.9	0.982	0.725	79.4	139.7	25685	909	0.355	0.0177	4.94	7.13	2.15
C	WK3	0.0971	0.00438	851.1	0.975	0.701	60.1	112.7	25712	848	0.347	0.0248	4.73	6.82	2.05
C	WK4	0.116	0.00237	582.5	0.961	0.646	34.7	61	25691	578	0.347	0.0392	4.11	5.93	1.79
C	WK5	0.196	0.00306	662	0.948	0.672	33.3	78.2	25552	660	0.247	0.0519	4.36	6.29	1.89
C	WK6	0.149	0.00392	742.1	0.967	0.699	49.8	100.7	25697	734	0.346	0.0334	4.61	6.65	2
C	WK7	0.22	0.00185	564.9	0.928	0.609	21.3	47.4	25545	563	0.236	0.0723	3.86	5.57	1.68
C	WK8	0.116	0.00452	770.4	0.974	0.717	60	116.6	25796	766	0.326	0.0263	4.76	6.87	2.07
C	WK9	0.091	0.00498	795.6	0.979	0.728	70.7	128	25696	786	0.323	0.0211	4.85	7	2.11
