# Supplementary material for: Impact of Phellinus gilvus mycelia on growth, immunity and fecal microbiota in weaned piglets
Source: PeerJ. 2020 Apr 28;8:e9067. doi: 10.7717/peerj.9067 (PMC7194088; doi:10.7717/peerj.9067)
Supplement: File S5 [file peerj-08-9067-s005.xlsx]

## Sheet: Sheet1
	group	SH	SH	SH	SH	SH	SH	SH	SH	SH	SH	ATB	ATB	ATB	ATB	ATB	ATB	ATB	ATB	ATB	ATB	C	C	C	C	C	C	C	C	C	C
group	bray_curtis	JS1	JS10	JS2	JS3	JS4	JS5	JS6	JS7	JS8	JS9	K1	K10	K2	K3	K4	K5	K6	K7	K8	K9	WK1	WK10	WK2	WK3	WK4	WK5	WK6	WK7	WK8	WK9
SH	JS1	0	0.604	0.551	0.544	0.584	0.564	0.539	0.583	0.604	0.567	0.514	0.545	0.557	0.562	0.783	0.586	0.589	0.525	0.607	0.635	0.472	0.592	0.553	0.583	0.687	0.555	0.521	0.656	0.546	0.583
SH	JS10	0.604	0	0.617	0.617	0.707	0.489	0.552	0.44	0.688	0.471	0.543	0.479	0.562	0.6	0.757	0.585	0.565	0.486	0.485	0.597	0.555	0.504	0.602	0.668	0.711	0.567	0.509	0.542	0.493	0.507
SH	JS2	0.551	0.617	0	0.617	0.57	0.637	0.65	0.67	0.588	0.552	0.529	0.576	0.645	0.677	0.819	0.68	0.677	0.625	0.616	0.658	0.492	0.591	0.563	0.544	0.714	0.572	0.601	0.653	0.572	0.617
SH	JS3	0.544	0.617	0.617	0	0.668	0.66	0.612	0.742	0.701	0.706	0.52	0.568	0.587	0.492	0.745	0.535	0.56	0.617	0.73	0.596	0.6	0.597	0.559	0.647	0.757	0.651	0.509	0.69	0.642	0.593
SH	JS4	0.584	0.707	0.57	0.668	0	0.713	0.696	0.75	0.154	0.565	0.587	0.613	0.68	0.719	0.864	0.732	0.741	0.658	0.666	0.725	0.462	0.563	0.55	0.45	0.775	0.651	0.658	0.672	0.624	0.686
SH	JS5	0.564	0.489	0.637	0.66	0.713	0	0.621	0.306	0.715	0.588	0.597	0.578	0.658	0.634	0.833	0.654	0.65	0.488	0.652	0.689	0.583	0.547	0.608	0.688	0.772	0.63	0.583	0.669	0.604	0.616
SH	JS6	0.539	0.552	0.65	0.612	0.696	0.621	0	0.644	0.696	0.636	0.539	0.525	0.459	0.572	0.656	0.48	0.481	0.601	0.639	0.517	0.554	0.693	0.64	0.673	0.602	0.488	0.445	0.62	0.589	0.439
SH	JS7	0.583	0.44	0.67	0.742	0.75	0.306	0.644	0	0.735	0.563	0.643	0.582	0.69	0.703	0.848	0.72	0.691	0.538	0.575	0.708	0.61	0.499	0.666	0.712	0.786	0.629	0.618	0.616	0.597	0.612
SH	JS8	0.604	0.688	0.588	0.701	0.154	0.715	0.696	0.735	0	0.552	0.605	0.61	0.703	0.729	0.866	0.74	0.737	0.663	0.655	0.717	0.468	0.551	0.565	0.465	0.779	0.653	0.659	0.65	0.619	0.67
SH	JS9	0.567	0.471	0.552	0.706	0.565	0.588	0.636	0.563	0.552	0	0.533	0.467	0.697	0.696	0.823	0.724	0.685	0.598	0.449	0.703	0.494	0.484	0.567	0.57	0.68	0.528	0.627	0.46	0.513	0.58
ATB	K1	0.514	0.543	0.529	0.52	0.587	0.597	0.539	0.643	0.605	0.533	0	0.258	0.523	0.563	0.717	0.549	0.576	0.525	0.579	0.584	0.501	0.558	0.528	0.567	0.608	0.511	0.43	0.613	0.462	0.508
ATB	K10	0.545	0.479	0.576	0.568	0.613	0.578	0.525	0.582	0.61	0.467	0.258	0	0.554	0.59	0.667	0.593	0.506	0.495	0.532	0.49	0.502	0.515	0.567	0.587	0.65	0.524	0.41	0.576	0.501	0.479
ATB	K2	0.557	0.562	0.645	0.587	0.68	0.658	0.459	0.69	0.703	0.697	0.523	0.554	0	0.53	0.66	0.434	0.454	0.588	0.685	0.513	0.608	0.7	0.638	0.676	0.674	0.61	0.462	0.755	0.601	0.56
ATB	K3	0.562	0.6	0.677	0.492	0.719	0.634	0.572	0.703	0.729	0.696	0.563	0.59	0.53	0	0.663	0.477	0.505	0.597	0.709	0.573	0.615	0.673	0.652	0.671	0.75	0.665	0.526	0.728	0.693	0.596
ATB	K4	0.783	0.757	0.819	0.745	0.864	0.833	0.656	0.848	0.866	0.823	0.717	0.667	0.66	0.663	0	0.616	0.542	0.819	0.83	0.56	0.793	0.855	0.817	0.832	0.766	0.8	0.57	0.88	0.81	0.684
ATB	K5	0.586	0.585	0.68	0.535	0.732	0.654	0.48	0.72	0.74	0.724	0.549	0.593	0.434	0.477	0.616	0	0.192	0.605	0.731	0.529	0.624	0.726	0.636	0.728	0.679	0.661	0.463	0.767	0.628	0.532
ATB	K6	0.589	0.565	0.677	0.56	0.741	0.65	0.481	0.691	0.737	0.685	0.576	0.506	0.454	0.505	0.542	0.192	0	0.603	0.708	0.433	0.627	0.712	0.634	0.72	0.706	0.667	0.396	0.759	0.629	0.542
ATB	K7	0.525	0.486	0.625	0.617	0.658	0.488	0.601	0.538	0.663	0.598	0.525	0.495	0.588	0.597	0.819	0.605	0.603	0	0.612	0.63	0.532	0.568	0.6	0.655	0.759	0.588	0.544	0.627	0.53	0.578
ATB	K8	0.607	0.485	0.616	0.73	0.666	0.652	0.639	0.575	0.655	0.449	0.579	0.532	0.685	0.709	0.83	0.731	0.708	0.612	0	0.694	0.543	0.537	0.613	0.641	0.731	0.6	0.62	0.476	0.493	0.598
ATB	K9	0.635	0.597	0.658	0.596	0.725	0.689	0.517	0.708	0.717	0.703	0.584	0.49	0.513	0.573	0.56	0.529	0.433	0.63	0.694	0	0.633	0.705	0.675	0.704	0.716	0.641	0.44	0.743	0.647	0.535
C	WK1	0.472	0.555	0.492	0.6	0.462	0.583	0.554	0.61	0.468	0.494	0.501	0.502	0.608	0.615	0.793	0.624	0.627	0.532	0.543	0.633	0	0.538	0.529	0.364	0.647	0.512	0.533	0.551	0.506	0.507
C	WK10	0.592	0.504	0.591	0.597	0.563	0.547	0.693	0.499	0.551	0.484	0.558	0.515	0.7	0.673	0.855	0.726	0.712	0.568	0.537	0.705	0.538	0	0.498	0.604	0.787	0.611	0.586	0.472	0.558	0.63
C	WK2	0.553	0.602	0.563	0.559	0.55	0.608	0.64	0.666	0.565	0.567	0.528	0.567	0.638	0.652	0.817	0.636	0.634	0.6	0.613	0.675	0.529	0.498	0	0.572	0.707	0.633	0.562	0.616	0.563	0.629
C	WK3	0.583	0.668	0.544	0.647	0.45	0.688	0.673	0.712	0.465	0.57	0.567	0.587	0.676	0.671	0.832	0.728	0.72	0.655	0.641	0.704	0.364	0.604	0.572	0	0.736	0.647	0.618	0.67	0.655	0.608
C	WK4	0.687	0.711	0.714	0.757	0.775	0.772	0.602	0.786	0.779	0.68	0.608	0.65	0.674	0.75	0.766	0.679	0.706	0.759	0.731	0.716	0.647	0.787	0.707	0.736	0	0.606	0.648	0.715	0.669	0.615
C	WK5	0.555	0.567	0.572	0.651	0.651	0.63	0.488	0.629	0.653	0.528	0.511	0.524	0.61	0.665	0.8	0.661	0.667	0.588	0.6	0.641	0.512	0.611	0.633	0.647	0.606	0	0.545	0.435	0.524	0.499
C	WK6	0.521	0.509	0.601	0.509	0.658	0.583	0.445	0.618	0.659	0.627	0.43	0.41	0.462	0.526	0.57	0.463	0.396	0.544	0.62	0.44	0.533	0.586	0.562	0.618	0.648	0.545	0	0.632	0.547	0.479
C	WK7	0.656	0.542	0.653	0.69	0.672	0.669	0.62	0.616	0.65	0.46	0.613	0.576	0.755	0.728	0.88	0.767	0.759	0.627	0.476	0.743	0.551	0.472	0.616	0.67	0.715	0.435	0.632	0	0.531	0.607
C	WK8	0.546	0.493	0.572	0.642	0.624	0.604	0.589	0.597	0.619	0.513	0.462	0.501	0.601	0.693	0.81	0.628	0.629	0.53	0.493	0.647	0.506	0.558	0.563	0.655	0.669	0.524	0.547	0.531	0	0.597
C	WK9	0.583	0.507	0.617	0.593	0.686	0.616	0.439	0.612	0.67	0.58	0.508	0.479	0.56	0.596	0.684	0.532	0.542	0.578	0.598	0.535	0.507	0.63	0.629	0.608	0.615	0.499	0.479	0.607	0.597	0
