# Supplementary material for: Impact of Phellinus gilvus mycelia on growth, immunity and fecal microbiota in weaned piglets
Source: PeerJ. 2020 Apr 28;8:e9067. doi: 10.7717/peerj.9067 (PMC7194088; doi:10.7717/peerj.9067)
Supplement: File S6 [file peerj-08-9067-s006.xlsx]

## Sheet: Sheet1
														C	C	C	C	C	C	C	C	C	C	ATB	ATB	ATB	ATB	ATB	ATB	ATB	ATB	ATB	ATB
OTUID	logFC	logCPM	PValue	FDR	level	Kindom	Phylum	Class	Order	Family	Genus	MeanA	MeanB	WK1	WK2	WK3	WK4	WK5	WK6	WK7	WK8	WK9	WK10	K1	K2	K3	K4	K5	K6	K7	K8	K9	K10
OTU84	9.463	11.398	6.31e-10	1.1e-06	Enriched	Bacteria	Spirochaetes	Spirochaetia	Spirochaetales	Spirochaetaceae	Treponema	0.459	0.001	0.043	0.153	0.175	2.909	0	0	0.124	0.96	0.119	0.103	0	0.002	0	0	0	0	0.003	0	0	0
OTU1493	-8.477	9.086	1.66e-08	1.45e-05	Depleted	Bacteria	Firmicutes	Clostridia	Clostridiales	Ruminococcaceae	Ruminococcus	0	0.089	0	0	0	0	0	0	0	0	0	0	0.005	0	0.093	0.125	0.15	0.259	0	0	0.254	0.005
OTU815	4.309	8.414	1.91e-06	0.00111384	Enriched	Bacteria	Firmicutes	Unassigned	Unassigned	Unassigned	Unassigned	0.051	0.003	0.033	0.027	0.025	0.037	0.054	0.013	0.229	0.041	0.017	0.034	0.005	0.007	0.002	0	0.003	0	0	0	0.005	0.005
OTU125	-7.282	9.193	2.61e-06	0.00114158	Depleted	Bacteria	Firmicutes	Negativicutes	Selenomonadales	Veillonellaceae	Megasphaera	0	0.078	0	0.002	0	0	0	0	0	0	0.002	0	0	0.086	0.098	0.468	0.013	0.015	0	0	0.1	0
OTU534	-3.759	12.807	4.99e-06	0.00134737	Depleted	Bacteria	Bacteroidetes	Bacteroidia	Bacteroidales	Prevotellaceae	Prevotella	0.109	1.201	0.115	0.085	0.052	0.061	0.038	0.411	0.006	0.102	0.208	0.012	0.43	0.85	2.521	1.194	3.253	2.209	0.29	0.06	0.947	0.256
OTU803	6.216	10.708	5.39e-06	0.00134737	Enriched	Bacteria	Firmicutes	Clostridia	Clostridiales	Unassigned	Unassigned	0.325	0.004	1.299	0.116	1.629	0.016	0.005	0.003	0.002	0.006	0.005	0.169	0.014	0	0	0	0.003	0	0	0	0.012	0.014
OTU418	-4.693	12.464	5.4e-06	0.00134737	Depleted	Bacteria	Bacteroidetes	Bacteroidia	Bacteroidales	Prevotellaceae	Prevotella	0.045	0.925	0.033	0.022	0.02	0.026	0.009	0.15	0.039	0.067	0.077	0.002	0.05	0.332	2.418	1.528	2.545	2.097	0.048	0	0.212	0.021
OTU1274	6.391	7.344	8.92e-06	0.00194882	Enriched	Bacteria	Firmicutes	Clostridia	Clostridiales	Unassigned	Unassigned	0.027	0	0.024	0	0.009	0	0.007	0	0.023	0.016	0.188	0	0	0	0	0	0	0	0	0	0	0
OTU595	-7.85	11.547	1.78e-05	0.00346173	Depleted	Bacteria	Firmicutes	Unassigned	Unassigned	Unassigned	Unassigned	0.003	0.396	0	0	0	0	0	0.003	0	0	0.02	0.004	0	0.515	0.025	3.351	0.013	0.018	0	0	0.042	0
OTU39	9.767	10.31	2.05e-05	0.00358734	Enriched	Bacteria	Proteobacteria	Gammaproteobacteria	Pseudomonadales	Moraxellaceae	Acinetobacter	0.223	0	0	0.017	2.213	0	0	0	0	0	0	0	0	0	0	0	0	0	0	0	0	0
OTU1099	-5.332	9.048	2.31e-05	0.00367029	Depleted	Bacteria	Firmicutes	Clostridia	Clostridiales	Eubacteriaceae	Pseudoramibacter	0.002	0.086	0.002	0	0.004	0	0.002	0	0	0	0.012	0.002	0.002	0.429	0.253	0.077	0	0.003	0.003	0.002	0.085	0.007
OTU786	8.443	9.911	2.79e-05	0.00379545	Enriched	Bacteria	Firmicutes	Clostridia	Clostridiales	Ruminococcaceae	Unassigned	0.204	0	0	1.426	0	0.002	0	0	0	0	0.002	0.61	0	0	0	0	0	0.003	0	0	0	0
OTU1678	-8.558	9.163	2.82e-05	0.00379545	Depleted	Bacteria	Firmicutes	Clostridia	Clostridiales	Ruminococcaceae	Unassigned	0	0.109	0	0	0	0	0	0	0	0	0	0	0	0	0	0	0.56	0.528	0	0	0	0
OTU887	-6.241	7.206	5.46e-05	0.0060368	Depleted	Bacteria	Firmicutes	Clostridia	Clostridiales	Lachnospiraceae	Unassigned	0	0.014	0	0	0	0	0	0	0	0	0	0	0	0	0.01	0.116	0.003	0.005	0	0	0.007	0
OTU131	8.434	9.05	5.91e-05	0.0060368	Enriched	Bacteria	Firmicutes	Bacilli	Bacillales	Planococcaceae	Kurthia	0.09	0	0	0.09	0.813	0	0	0	0	0	0	0	0	0	0	0	0	0	0	0	0	0
OTU731	8.473	9.09	5.94e-05	0.0060368	Enriched	Bacteria	Verrucomicrobia	Verrucomicrobiae	Verrucomicrobiales	Verrucomicrobiaceae	Akkermansia	0.1	0	0	0.046	0	0	0	0	0	0	0	0.949	0	0	0	0	0	0	0	0	0	0
OTU532	-5.314	8.994	6.21e-05	0.0060368	Depleted	Bacteria	Bacteroidetes	Bacteroidia	Bacteroidales	Prevotellaceae	Prevotella	0.002	0.081	0.002	0	0	0.002	0	0.015	0	0	0.002	0	0.002	0.041	0.162	0.114	0.288	0.18	0	0	0.02	0
OTU119	6.625	7.518	6.53e-05	0.0060368	Enriched	Bacteria	Unassigned	Unassigned	Unassigned	Unassigned	Unassigned	0.03	0	0.165	0.007	0.016	0	0	0	0	0	0	0.109	0	0	0	0	0	0	0	0	0	0
OTU422	8.734	9.328	6.56e-05	0.0060368	Enriched	Bacteria	Bacteroidetes	Flavobacteriia	Flavobacteriales	Flavobacteriaceae	Unassigned	0.109	0	0	0.002	1.085	0	0	0	0	0	0	0	0	0	0	0	0	0	0	0	0	0
OTU112	7.692	9.205	7.92e-05	0.0069193	Enriched	Bacteria	Unassigned	Unassigned	Unassigned	Unassigned	Unassigned	0.124	0	0.002	0	0.002	0	0	1.147	0	0	0.084	0	0	0	0	0	0	0.003	0	0	0	0
OTU92	-5.766	8.702	9.59e-05	0.00798209	Depleted	Bacteria	Proteobacteria	Deltaproteobacteria	Desulfovibrionales	Desulfovibrionaceae	Desulfovibrio	0.001	0.074	0	0	0	0	0.009	0.003	0	0	0	0	0.002	0.567	0.054	0.061	0.005	0	0	0.002	0.045	0
OTU58	8.213	8.848	0.000112683	0.00864609	Enriched	Bacteria	Proteobacteria	Gammaproteobacteria	Pseudomonadales	Moraxellaceae	Acinetobacter	0.076	0	0	0.002	0.755	0	0	0	0	0	0	0	0	0	0	0	0	0	0	0	0	0
OTU1036	3.365	8.626	0.000113764	0.00864609	Enriched	Bacteria	Firmicutes	Unassigned	Unassigned	Unassigned	Unassigned	0.068	0.006	0.045	0.206	0.029	0.119	0.016	0.025	0.009	0.022	0.203	0.006	0.002	0.018	0.002	0.007	0.01	0	0.006	0.009	0.002	0
OTU99	8.045	8.697	0.000122773	0.00894197	Enriched	Bacteria	Proteobacteria	Betaproteobacteria	Burkholderiales	Comamonadaceae	Comamonas	0.067	0	0	0.005	0.67	0	0	0	0	0	0	0	0	0	0	0	0	0	0	0	0	0
OTU17	-3.435	10.727	0.000145408	0.010167	Depleted	Bacteria	Firmicutes	Negativicutes	Selenomonadales	Veillonellaceae	Unassigned	0.031	0.279	0.01	0.029	0.004	0.007	0.081	0.013	0.008	0.138	0.015	0.01	0.005	0.325	0.83	0.145	0.622	0.267	0.529	0.013	0.05	0.007
OTU18	6.188	7.199	0.000158553	0.0104844	Enriched	Bacteria	Firmicutes	Negativicutes	Selenomonadales	Veillonellaceae	Unassigned	0.021	0	0.055	0.012	0.002	0	0	0	0	0	0	0.141	0	0	0	0	0	0	0	0	0	0
OTU685	-4.696	6.317	0.000162359	0.0104844	Depleted	Bacteria	Unassigned	Unassigned	Unassigned	Unassigned	Unassigned	0	0.007	0	0	0	0	0	0	0	0	0	0	0	0.002	0.002	0.002	0.023	0.018	0	0	0.02	0
OTU590	-7.203	8.653	0.000167942	0.0104844	Depleted	Bacteria	Bacteroidetes	Bacteroidia	Bacteroidales	Prevotellaceae	Prevotella	0	0.063	0	0	0	0	0	0	0	0	0.002	0	0	0.278	0.349	0	0	0	0	0	0.002	0
OTU1481	3.614	6.26	0.000223896	0.0132959	Enriched	Bacteria	Firmicutes	Clostridia	Clostridiales	Lachnospiraceae	Unassigned	0.006	0	0.007	0.005	0.007	0	0.007	0.005	0.006	0.01	0	0.016	0	0	0	0	0	0	0	0	0	0.002
OTU798	-4.627	8.296	0.000237334	0.0132959	Depleted	Bacteria	Firmicutes	Clostridia	Clostridiales	Lachnospiraceae	Unassigned	0.002	0.049	0	0	0	0	0.002	0.01	0.002	0.004	0	0.002	0	0.014	0	0.025	0.073	0.084	0.003	0.002	0.291	0
OTU453	7.331	8.076	0.000240606	0.0132959	Enriched	Bacteria	Bacteroidetes	Flavobacteriia	Flavobacteriales	Flavobacteriaceae	Empedobacter	0.041	0	0	0.01	0.402	0	0	0	0	0	0	0	0	0	0	0	0	0	0	0	0	0
OTU387	-6.22	10.36	0.000243403	0.0132959	Depleted	Bacteria	Bacteroidetes	Bacteroidia	Bacteroidales	Prevotellaceae	Prevotella	0.004	0.295	0	0	0	0	0.016	0	0	0	0.02	0	0.029	0.02	0.002	0.014	0	0	2.858	0.004	0	0.021
OTU1449	5.682	6.863	0.000256407	0.0135818	Enriched	Bacteria	Proteobacteria	Unassigned	Unassigned	Unassigned	Unassigned	0.014	0	0.007	0.029	0.016	0	0	0	0	0	0	0.093	0	0	0	0	0	0	0	0	0	0
OTU62	7.079	7.869	0.00030834	0.0158523	Enriched	Bacteria	Proteobacteria	Gammaproteobacteria	Pseudomonadales	Moraxellaceae	Acinetobacter	0.035	0	0	0.015	0.333	0	0	0	0	0	0	0	0	0	0	0	0	0	0	0	0	0
OTU423	-7.19	9.449	0.000333176	0.0165391	Depleted	Bacteria	Bacteroidetes	Bacteroidia	Bacteroidales	Prevotellaceae	Prevotella	0.001	0.089	0	0	0	0	0	0	0	0	0.007	0	0	0	0	0.731	0.065	0.091	0	0	0	0
OTU833	2.807	10.146	0.000341104	0.0165391	Enriched	Bacteria	Firmicutes	Unassigned	Unassigned	Unassigned	Unassigned	0.199	0.026	0.639	0.215	0.218	0.319	0.056	0.061	0.041	0.067	0.347	0.024	0.063	0.002	0.022	0.023	0.018	0.02	0	0.036	0.032	0.04
OTU1686	4.114	6.843	0.000350084	0.0165391	Enriched	Bacteria	Firmicutes	Clostridia	Clostridiales	Ruminococcaceae	Unassigned	0.013	0	0.022	0.007	0.049	0.026	0.002	0	0.004	0.002	0	0.014	0	0	0.002	0	0	0	0	0	0	0.002
OTU813	4.435	6.975	0.000372237	0.0171229	Enriched	Bacteria	Firmicutes	Clostridia	Clostridiales	Lachnospiraceae	Unassigned	0.017	0	0.022	0.002	0.02	0.014	0	0.005	0	0	0.107	0.004	0	0.002	0	0	0	0	0	0	0	0.002
OTU1195	5.353	6.668	0.000400321	0.0177396	Enriched	Bacteria	Firmicutes	Clostridia	Clostridiales	Lachnospiraceae	Unassigned	0.013	0	0.029	0.005	0	0	0	0	0	0	0.067	0.028	0	0	0	0	0	0	0	0	0	0
OTU6	-4.425	13.958	0.000412843	0.0177396	Depleted	Bacteria	Firmicutes	Negativicutes	Selenomonadales	Veillonellaceae	Selenomonas	0.16	2.164	0.206	0.002	0.034	0.002	0.009	1.065	0.002	0.171	0.084	0.026	0.009	0.194	5.272	11.886	1.493	1.521	0.208	0	1.054	0.002
OTU596	-5.154	6.544	0.000428771	0.0177396	Depleted	Bacteria	Bacteroidetes	Bacteroidia	Bacteroidales	Prevotellaceae	Prevotella	0	0.01	0	0	0	0	0	0	0	0	0	0	0	0.007	0	0.002	0.052	0.038	0	0	0	0
OTU505	-3.171	13.979	0.000429405	0.0177396	Depleted	Bacteria	Bacteroidetes	Bacteroidia	Bacteroidales	Prevotellaceae	Prevotella	0.357	2.661	0.136	0.208	0.13	0.23	0.07	1.743	0.028	0.29	0.706	0.024	0.197	3.83	5.872	1.975	7.568	5.758	0.168	0.03	0.994	0.221
OTU1100	-4.764	8.491	0.000436386	0.0177396	Depleted	Bacteria	Firmicutes	Unassigned	Unassigned	Unassigned	Unassigned	0.002	0.06	0.007	0.007	0.002	0	0.005	0	0	0	0	0	0	0.036	0.002	0.043	0.262	0.241	0	0	0.017	0
OTU1109	-5.5	7.617	0.00047933	0.0190425	Depleted	Bacteria	Firmicutes	Clostridia	Clostridiales	Unassigned	Unassigned	0	0.034	0	0	0	0	0.002	0	0	0	0	0.002	0.188	0	0	0	0.003	0	0	0	0.025	0.127
OTU124	-4.651	8.217	0.000529767	0.0202122	Depleted	Bacteria	Proteobacteria	Betaproteobacteria	Burkholderiales	Sutterellaceae	Parasutterella	0.002	0.05	0.002	0	0	0	0.009	0.003	0	0	0.005	0	0.023	0.352	0.066	0.018	0.036	0.003	0	0	0	0
OTU921	-4.269	6.139	0.0005319	0.0202122	Depleted	Bacteria	Firmicutes	Clostridia	Clostridiales	Unassigned	Unassigned	0	0.006	0	0	0	0	0	0	0	0	0	0	0.011	0	0	0.005	0	0	0.026	0.002	0	0.012
OTU1242	3.098	11.1	0.000588471	0.0218861	Enriched	Bacteria	Firmicutes	Unassigned	Unassigned	Unassigned	Unassigned	0.381	0.04	1.253	0.111	0.75	0.012	0.145	0.058	0.881	0.079	0.379	0.141	0.027	0.009	0.032	0.007	0.018	0.015	0	0.239	0.025	0.028
OTU623	-4.532	12.222	0.000636514	0.0226878	Depleted	Bacteria	Bacteroidetes	Bacteroidia	Bacteroidales	Unassigned	Unassigned	0.044	0.652	0.024	0	0.02	0.002	0.005	0.368	0	0.01	0.002	0.004	0.023	0.504	0.002	4.558	0.656	0.668	0.065	0	0.007	0.033
OTU506	-4.442	6.929	0.000638488	0.0226878	Depleted	Bacteria	Bacteroidetes	Bacteroidia	Bacteroidales	Prevotellaceae	Prevotella	0.001	0.014	0	0	0	0	0	0.003	0	0	0.002	0	0	0.002	0.022	0.009	0.062	0.043	0	0	0.002	0
OTU155	-4.628	7.549	0.000648965	0.0226878	Depleted	Bacteria	Proteobacteria	Betaproteobacteria	Burkholderiales	Unassigned	Unassigned	0.001	0.026	0	0	0	0	0	0.005	0	0	0.002	0.002	0	0.12	0.037	0.032	0.021	0	0	0	0.047	0
OTU726	-3.029	10.271	0.000700066	0.0238188	Depleted	Bacteria	Firmicutes	Clostridia	Clostridiales	Unassigned	Unassigned	0.027	0.233	0.007	0.061	0.011	0	0.005	0.028	0.032	0.026	0.04	0.062	0.054	0.47	0.064	0.005	0.013	0.038	1.191	0.011	0.359	0.124
OTU1079	3.685	6.303	0.000708568	0.0238188	Enriched	Bacteria	Firmicutes	Clostridia	Clostridiales	Ruminococcaceae	Unassigned	0.007	0	0.005	0.029	0.004	0	0.002	0.003	0.004	0	0.02	0.006	0	0	0	0	0	0	0.003	0	0	0
OTU302	-5.282	7.125	0.000781881	0.0257873	Depleted	Bacteria	Firmicutes	Negativicutes	Selenomonadales	Veillonellaceae	Unassigned	0	0.013	0	0	0	0	0	0.003	0	0	0	0	0	0	0.01	0.109	0.003	0.003	0	0	0.002	0
OTU402	3.419	9.404	0.000831535	0.0268857	Enriched	Bacteria	Bacteroidetes	Bacteroidia	Bacteroidales	Bacteroidaceae	Bacteroides	0.101	0.011	0.105	0.058	0.24	0.548	0.004	0.008	0	0.008	0.032	0.002	0.016	0.011	0.015	0.002	0.016	0.02	0.014	0.009	0.002	0
OTU105	3.682	9.19	0.00087147	0.0268857	Enriched	Bacteria	Spirochaetes	Spirochaetia	Spirochaetales	Spirochaetaceae	Treponema	0.085	0.008	0.017	0.015	0.027	0.557	0.007	0.066	0.019	0	0.015	0.123	0.007	0.005	0	0	0.005	0.008	0	0	0.01	0.047
OTU1438	4.544	6.263	0.000889632	0.0268857	Enriched	Bacteria	Firmicutes	Clostridia	Clostridiales	Ruminococcaceae	Unassigned	0.007	0	0.007	0.031	0.002	0.002	0	0	0	0	0	0.024	0	0	0	0	0	0	0	0	0	0
OTU804	2.909	10.048	0.000903956	0.0268857	Enriched	Bacteria	Firmicutes	Unassigned	Unassigned	Unassigned	Unassigned	0.16	0.024	0.108	0.08	0.049	0.016	0.013	0.074	0.89	0.043	0.206	0.117	0.023	0.041	0	0	0.049	0.028	0.02	0.045	0.007	0.031
OTU370	2.458	11.795	0.000925723	0.0268857	Enriched	Bacteria	Bacteroidetes	Bacteroidia	Bacteroidales	Prevotellaceae	Prevotella	0.591	0.112	0.734	0.896	0.694	0.323	0.253	0.386	0.809	0.073	0.352	1.39	0.326	0.023	0.14	0	0.111	0.096	0.117	0.03	0.1	0.178
OTU1437	-4.769	7.564	0.000933399	0.0268857	Depleted	Bacteria	Firmicutes	Clostridia	Clostridiales	Lachnospiraceae	Unassigned	0.001	0.024	0	0	0	0	0	0	0	0.004	0.005	0	0	0	0.007	0.052	0.029	0.025	0	0	0.13	0
OTU592	-3.821	9.269	0.000936206	0.0268857	Depleted	Bacteria	Bacteroidetes	Bacteroidia	Bacteroidales	Porphyromonadaceae	Unassigned	0.008	0.119	0.017	0.019	0.007	0	0	0	0.011	0	0.022	0.002	0.018	1.019	0	0.007	0.029	0.028	0.068	0.006	0.005	0.009
OTU658	3.821	6.885	0.000938232	0.0268857	Enriched	Bacteria	Bacteroidetes	Bacteroidia	Bacteroidales	Porphyromonadaceae	Unassigned	0.014	0.001	0.019	0.053	0.011	0	0.011	0.003	0.028	0	0	0.016	0	0	0	0	0	0	0.006	0	0	0.002
OTU756	-4.733	6.324	0.000968991	0.0273193	Depleted	Bacteria	Actinobacteria	Actinobacteria	Coriobacteriales	Coriobacteriaceae	Unassigned	0	0.005	0	0	0	0	0	0	0	0	0	0	0	0	0.002	0.032	0.008	0.013	0	0	0	0
OTU65	6.119	7.143	0.000985743	0.0273505	Enriched	Bacteria	Proteobacteria	Gammaproteobacteria	Pseudomonadales	Moraxellaceae	Acinetobacter	0.018	0	0	0.012	0.166	0	0	0	0	0	0	0	0	0	0	0	0	0	0	0	0	0
OTU1172	4.144	6.103	0.00102653	0.028037	Enriched	Bacteria	Firmicutes	Clostridia	Clostridiales	Ruminococcaceae	Oscillibacter	0.005	0	0.017	0.005	0.013	0	0.011	0	0	0	0.005	0	0	0	0	0	0	0	0	0	0	0
OTU89	-3.117	9.867	0.00105149	0.0282769	Depleted	Bacteria	Firmicutes	Bacilli	Lactobacillales	Streptococcaceae	Streptococcus	0.02	0.135	0.074	0.031	0.004	0.012	0.004	0	0	0.006	0.01	0.054	0.023	0.138	0.801	0.009	0.106	0.074	0.034	0.019	0.107	0.035
OTU631	-3.597	8.238	0.00107339	0.0284286	Depleted	Bacteria	Bacteroidetes	Bacteroidia	Bacteroidales	Unassigned	Unassigned	0.004	0.055	0.01	0.007	0.002	0	0	0.003	0	0.004	0.01	0.006	0.023	0.061	0.002	0	0.016	0.003	0.429	0.004	0	0.016
OTU808	2.944	9.022	0.00112576	0.0293705	Enriched	Bacteria	Firmicutes	Clostridia	Clostridiales	Unassigned	Unassigned	0.087	0.01	0.273	0.053	0.218	0.089	0.009	0.01	0.011	0.002	0.169	0.036	0.025	0.002	0	0.018	0.013	0.005	0	0.004	0.007	0.028
OTU660	4.676	6.319	0.0011686	0.0298544	Enriched	Bacteria	Bacteroidetes	Unassigned	Unassigned	Unassigned	Unassigned	0.007	0	0.017	0.007	0.031	0	0	0	0	0	0	0.014	0	0	0	0	0	0	0	0	0	0
OTU198	-3.494	5.895	0.00117872	0.0298544	Depleted	Bacteria	Unassigned	Unassigned	Unassigned	Unassigned	Unassigned	0	0.003	0	0	0	0	0	0	0	0	0	0	0	0.007	0	0.009	0.003	0	0.003	0.002	0	0.002
OTU1364	-3.894	6.006	0.00119554	0.0298544	Depleted	Bacteria	Firmicutes	Clostridia	Clostridiales	Unassigned	Unassigned	0	0.004	0	0	0	0	0	0	0	0	0	0	0.002	0.02	0	0.002	0	0	0	0	0.01	0.005
OTU597	-4.231	6.509	0.00129423	0.0312268	Depleted	Bacteria	Bacteroidetes	Bacteroidia	Bacteroidales	Prevotellaceae	Prevotella	0	0.009	0	0	0	0	0	0.003	0	0	0	0	0	0.005	0.002	0	0.057	0.023	0.003	0	0.002	0
OTU513	-4.665	7.592	0.00129961	0.0312268	Depleted	Bacteria	Bacteroidetes	Bacteroidia	Bacteroidales	Prevotellaceae	Prevotella	0.001	0.028	0	0	0	0	0	0.008	0	0	0.002	0	0	0.02	0.029	0.007	0.132	0.094	0	0	0	0
OTU377	-2.727	11.825	0.00130409	0.0312268	Depleted	Bacteria	Bacteroidetes	Bacteroidia	Bacteroidales	Prevotellaceae	Unassigned	0.093	0.583	0.041	0.056	0.052	0.239	0.034	0.32	0.023	0.006	0.079	0.078	0.122	0.981	0.673	0.393	1.221	0.818	0.014	0.013	1.539	0.061
OTU1741	-4.486	6.224	0.00132483	0.0312946	Depleted	Archaea	Euryarchaeota	Methanobacteria	Methanobacteriales	Methanobacteriaceae	Methanobrevibacter	0	0.006	0	0	0	0	0	0	0	0	0	0	0	0	0	0.005	0.039	0.013	0	0	0.002	0
OTU1033	3.849	11.492	0.0014843	0.034594	Enriched	Bacteria	Firmicutes	Clostridia	Clostridiales	Ruminococcaceae	Unassigned	0.555	0.029	1.772	0.123	1.341	0	0.018	0.005	0.019	0.01	0.731	1.535	0.002	0.016	0.216	0	0.003	0.003	0.023	0.028	0.005	0
OTU1253	6.494	10.227	0.00151603	0.0348686	Enriched	Bacteria	Firmicutes	Clostridia	Clostridiales	Ruminococcaceae	Ruminococcus	0.261	0.003	0	0.01	0	0	2.575	0	0	0	0	0.03	0.011	0	0	0	0	0	0	0	0	0.014
OTU1455	4.464	6.227	0.00157962	0.0351339	Enriched	Bacteria	Proteobacteria	Unassigned	Unassigned	Unassigned	Unassigned	0.006	0	0.012	0.007	0.022	0	0	0	0	0	0	0.018	0	0	0	0	0	0	0	0	0	0
OTU926	3.27	5.838	0.00158218	0.0351339	Enriched	Bacteria	Firmicutes	Clostridia	Clostridiales	Ruminococcaceae	Clostridium_III	0.003	0	0.002	0.005	0	0	0.005	0	0.004	0	0.005	0.004	0	0	0	0	0	0	0	0	0	0
OTU535	-3.561	6.413	0.00160716	0.0351339	Depleted	Bacteria	Bacteroidetes	Bacteroidia	Bacteroidales	Prevotellaceae	Prevotella	0	0.008	0.002	0	0	0	0	0	0	0.002	0	0	0.005	0	0.01	0.002	0.023	0.03	0.003	0	0.002	0
OTU1539	-3.675	6.508	0.00160796	0.0351339	Depleted	Bacteria	Firmicutes	Clostridia	Clostridiales	Lachnospiraceae	Unassigned	0	0.008	0	0	0	0	0	0	0.002	0	0.002	0	0	0.009	0.029	0	0	0.005	0	0.011	0.015	0.009
OTU852	3.12	7.393	0.0016628	0.0356661	Enriched	Bacteria	Firmicutes	Clostridia	Clostridiales	Ruminococcaceae	Unassigned	0.022	0.002	0.048	0.015	0.065	0.033	0.004	0	0.015	0.02	0.002	0.014	0	0	0.002	0	0	0	0	0.009	0.007	0.002
OTU420	3.672	8.914	0.00167313	0.0356661	Enriched	Bacteria	Bacteroidetes	Bacteroidia	Bacteroidales	Prevotellaceae	Prevotella	0.083	0.006	0.108	0.259	0.389	0	0.013	0.008	0.015	0.022	0	0.018	0.007	0.002	0	0	0	0	0.02	0.026	0	0.007
OTU490	-3.73	5.957	0.0018874	0.0397491	Depleted	Bacteria	Bacteroidetes	Bacteroidia	Bacteroidales	Porphyromonadaceae	Barnesiella	0	0.003	0	0	0	0	0	0	0	0	0	0	0	0.011	0	0.011	0.003	0	0	0	0.002	0.002
OTU1553	-4.137	6.089	0.00199678	0.0399875	Depleted	Bacteria	Firmicutes	Clostridia	Clostridiales	Lachnospiraceae	Unassigned	0	0.005	0	0	0	0	0	0	0	0	0	0	0	0.002	0.005	0	0	0	0.02	0	0.02	0
OTU401	-4.348	9.27	0.00199924	0.0399875	Depleted	Bacteria	Bacteroidetes	Bacteroidia	Bacteroidales	Porphyromonadaceae	Unassigned	0.006	0.111	0	0	0	0.002	0	0.043	0	0	0.012	0	0	0.002	0.007	0.007	0.399	0.559	0.031	0.002	0.107	0
OTU1433	4.405	8.037	0.00201229	0.0399875	Enriched	Bacteria	Firmicutes	Clostridia	Clostridiales	Lachnospiraceae	Unassigned	0.049	0.002	0.007	0.467	0.002	0	0	0.01	0	0	0.002	0	0.002	0.005	0	0.002	0.003	0	0.003	0.002	0	0
OTU153	-3.523	8.965	0.00201426	0.0399875	Depleted	Bacteria	Firmicutes	Negativicutes	Selenomonadales	Veillonellaceae	Megasphaera	0.008	0.062	0.005	0	0.002	0.012	0.002	0.041	0	0	0.015	0	0.005	0.018	0.005	0.388	0.018	0.053	0.006	0	0.087	0.04
OTU368	-2.777	10.919	0.00203575	0.0399875	Depleted	Bacteria	Bacteroidetes	Bacteroidia	Bacteroidales	Prevotellaceae	Unassigned	0.049	0.32	0	0.15	0.018	0.103	0.016	0.124	0.03	0.01	0.03	0.004	0.125	0.777	0.27	0.107	0.469	0.33	0.003	0.015	1.049	0.052
OTU713	2.81	10.199	0.00203598	0.0399875	Enriched	Bacteria	Firmicutes	Unassigned	Unassigned	Unassigned	Unassigned	0.174	0.027	0.024	0.056	0.011	0.063	0.079	0.099	0.976	0.138	0.084	0.207	0.036	0.023	0.012	0.002	0.003	0	0.028	0.137	0.01	0.014
OTU1122	5.027	6.486	0.00209517	0.0400925	Enriched	Bacteria	Unassigned	Unassigned	Unassigned	Unassigned	Unassigned	0.009	0	0.024	0	0.061	0	0	0	0	0	0.002	0	0	0	0	0	0	0	0	0	0	0
OTU1275	-3.32	10.236	0.00210633	0.0400925	Depleted	Bacteria	Firmicutes	Clostridia	Clostridiales	Unassigned	Unassigned	0.024	0.211	0	0	0.004	0	0.022	0.008	0.023	0.079	0.102	0	0.068	0.287	0.049	0	0.062	0.104	0.236	0.006	1.163	0.129
OTU736	3.144	12.868	0.00211013	0.0400925	Enriched	Bacteria	Firmicutes	Clostridia	Clostridiales	Ruminococcaceae	Ruminococcus	1.361	0.155	3.595	0.015	6.978	0.002	0.185	0.933	0.054	0.091	1.747	0.008	0.408	0.075	0.052	0.007	0.016	0.015	0.102	0.382	0.117	0.378
OTU50	-3.541	9.58	0.00217882	0.0408225	Depleted	Bacteria	Bacteroidetes	Bacteroidia	Bacteroidales	Unassigned	Unassigned	0.013	0.129	0	0	0	0	0.011	0	0	0.051	0.067	0.004	0.005	0.264	0.091	0.2	0.13	0.122	0.452	0	0.012	0.016
OTU544	-3.056	5.794	0.00219526	0.0408225	Depleted	Bacteria	Bacteroidetes	Bacteroidia	Bacteroidales	Prevotellaceae	Prevotella	0	0.002	0	0	0	0	0	0	0	0	0	0	0.002	0.002	0.005	0.002	0.005	0.003	0	0	0	0
OTU386	-3.024	10.787	0.00222377	0.0409173	Depleted	Bacteria	Bacteroidetes	Bacteroidia	Bacteroidales	Prevotellaceae	Unassigned	0.035	0.286	0.007	0.005	0.025	0.141	0.007	0.142	0.011	0	0.005	0.006	0.034	0.432	0.346	0.182	0.648	0.404	0.006	0.006	0.795	0.009
OTU1479	-5.138	6.535	0.00231033	0.0420673	Depleted	Bacteria	Firmicutes	Clostridia	Clostridiales	Ruminococcaceae	Unassigned	0	0.01	0	0	0	0	0	0	0	0	0	0	0	0	0	0	0.075	0.023	0	0	0	0
OTU200	5.983	7.049	0.00250296	0.044445	Enriched	Bacteria	Proteobacteria	Betaproteobacteria	Neisseriales	Neisseriaceae	Vitreoscilla	0.016	0	0	0	0.16	0	0	0	0	0	0	0	0	0	0	0	0	0	0	0	0	0
OTU1305	4.121	6.096	0.00250334	0.044445	Enriched	Bacteria	Firmicutes	Unassigned	Unassigned	Unassigned	Unassigned	0.005	0	0.007	0	0.013	0	0.022	0	0	0	0	0.006	0	0	0	0	0	0	0	0	0	0
OTU1407	-3.373	7.665	0.00251719	0.044445	Depleted	Bacteria	Firmicutes	Clostridia	Clostridiales	Lachnospiraceae	Unassigned	0.003	0.028	0	0	0	0	0.014	0.01	0	0.004	0	0	0.011	0.052	0.049	0	0.041	0.079	0.003	0	0.045	0.005
OTU645	3.745	5.971	0.0025818	0.0451298	Enriched	Bacteria	Bacteroidetes	Bacteroidia	Bacteroidales	Prevotellaceae	Unassigned	0.004	0	0.007	0	0.018	0	0.004	0	0	0	0.002	0.004	0	0	0	0	0	0	0	0	0	0
OTU143	-5.351	11.51	0.00274369	0.0474849	Depleted	Bacteria	Firmicutes	Bacilli	Lactobacillales	Lactobacillaceae	Lactobacillus	0.015	0.419	0	0.041	0	0	0	0.008	0	0.002	0.035	0.062	0	0	4.123	0.052	0.003	0	0.003	0	0.012	0
OTU551	-3.204	5.821	0.0028451	0.0484302	Depleted	Bacteria	Bacteroidetes	Bacteroidia	Bacteroidales	Prevotellaceae	Prevotella	0	0.002	0	0	0	0	0	0	0	0	0	0	0	0.002	0.005	0	0.008	0.005	0.003	0	0	0
OTU1742	-3.211	5.823	0.00285373	0.0484302	Depleted	Archaea	Euryarchaeota	Methanobacteria	Methanobacteriales	Methanobacteriaceae	Methanosphaera	0	0.002	0	0	0	0	0	0	0	0	0	0	0	0.005	0.002	0.002	0	0.005	0	0	0.007	0
OTU794	-5.657	6.808	0.00289632	0.0486805	Depleted	Bacteria	Actinobacteria	Actinobacteria	Coriobacteriales	Coriobacteriaceae	Unassigned	0	0.009	0	0	0	0	0	0	0	0	0	0	0	0	0	0.089	0	0	0	0	0	0
OTU983	2.975	5.782	0.0030835	0.0513329	Enriched	Bacteria	Firmicutes	Clostridia	Clostridiales	Unassigned	Unassigned	0.002	0	0.002	0	0	0.002	0.002	0.003	0.006	0.002	0	0.002	0	0	0	0	0	0	0	0	0	0
OTU194	5.743	6.893	0.00330033	0.0539588	Enriched	Bacteria	Proteobacteria	Betaproteobacteria	Burkholderiales	Comamonadaceae	Comamonas	0.013	0	0	0	0.135	0	0	0	0	0	0	0	0	0	0	0	0	0	0	0	0	0
OTU788	2.051	12.628	0.00332421	0.0539588	Enriched	Bacteria	Firmicutes	Unassigned	Unassigned	Unassigned	Unassigned	1.013	0.246	1.081	0.552	0.661	0.199	1.382	0.556	2.522	1.013	1.353	0.815	0.437	0.124	0.074	0.03	0.093	0.058	0.262	0.735	0.097	0.554
OTU1272	-4.628	7.592	0.00333384	0.0539588	Depleted	Bacteria	Firmicutes	Clostridia	Clostridiales	Unassigned	Unassigned	0.001	0.029	0	0	0	0	0.007	0.003	0	0	0	0	0	0.007	0.012	0	0.124	0.15	0	0	0	0
OTU916	3.568	5.919	0.00339082	0.0543776	Enriched	Bacteria	Firmicutes	Clostridia	Clostridiales	Ruminococcaceae	Unassigned	0.003	0	0.01	0	0.013	0	0	0	0.002	0.004	0.002	0	0	0	0	0	0	0	0	0	0	0
OTU816	2.203	8.704	0.00345232	0.0548605	Enriched	Bacteria	Firmicutes	Clostridia	Clostridiales	Ruminococcaceae	Unassigned	0.065	0.013	0.115	0.092	0.029	0.019	0.17	0.023	0.068	0.041	0.052	0.044	0.011	0.007	0.017	0.007	0	0	0.04	0.019	0.002	0.026
OTU228	5.128	6.537	0.00348811	0.0549298	Enriched	Bacteria	Firmicutes	Bacilli	Bacillales	Bacillaceae_1	Bacillus	0.009	0	0	0.017	0.074	0	0	0	0	0	0	0	0	0	0	0	0	0	0	0	0	0
OTU1087	3.711	8.522	0.00355919	0.0555488	Enriched	Bacteria	Unassigned	Unassigned	Unassigned	Unassigned	Unassigned	0.064	0.004	0.359	0.007	0.195	0	0.029	0	0	0.008	0.012	0.03	0.011	0	0	0	0.003	0	0	0.019	0	0.009
OTU1137	2.956	6.255	0.00364259	0.0563474	Enriched	Bacteria	Unassigned	Unassigned	Unassigned	Unassigned	Unassigned	0.006	0	0.01	0.002	0.013	0	0.022	0.003	0.004	0.002	0	0.004	0.002	0	0.002	0	0	0	0	0	0	0
OTU894	4.066	6.076	0.00370653	0.0568334	Enriched	Bacteria	Firmicutes	Clostridia	Clostridiales	Unassigned	Unassigned	0.005	0	0	0.034	0.004	0	0	0	0.002	0	0	0.008	0	0	0	0	0	0	0	0	0	0
OTU66	5.646	6.832	0.00377225	0.0573382	Enriched	Bacteria	Proteobacteria	Gammaproteobacteria	Pseudomonadales	Moraxellaceae	Acinetobacter	0.013	0	0	0	0.126	0	0	0	0	0	0	0	0	0	0	0	0	0	0	0	0	0
OTU1267	-4.307	7.289	0.00382057	0.057572	Depleted	Bacteria	Firmicutes	Clostridia	Clostridiales	Unassigned	Unassigned	0.001	0.019	0	0	0	0	0	0	0	0	0	0.008	0.02	0	0.049	0	0	0	0	0.094	0.005	0.021
OTU366	3.681	8.841	0.00393207	0.0580903	Enriched	Bacteria	Bacteroidetes	Bacteroidia	Bacteroidales	Prevotellaceae	Unassigned	0.062	0.005	0.01	0.015	0.002	0.527	0	0.013	0.019	0.035	0	0	0.011	0	0.005	0	0	0.003	0	0.024	0.005	0.007
OTU633	3.61	9.213	0.00393476	0.0580903	Enriched	Bacteria	Bacteroidetes	Bacteroidia	Bacteroidales	Prevotellaceae	Unassigned	0.105	0.008	0.251	0.056	0.467	0	0.217	0	0.008	0.004	0.04	0.004	0.029	0	0	0	0	0	0.006	0.036	0	0.009
OTU570	-2.538	7.139	0.0039572	0.0580903	Depleted	Bacteria	Bacteroidetes	Bacteroidia	Bacteroidales	Prevotellaceae	Prevotella	0.003	0.015	0.002	0.002	0.002	0.005	0.005	0.003	0.006	0	0	0	0.005	0.029	0.069	0.002	0.016	0.005	0.011	0.002	0.005	0.005
OTU1139	-5.42	6.665	0.00401477	0.0580903	Depleted	Bacteria	Firmicutes	Clostridia	Clostridiales	Eubacteriaceae	Eubacterium	0	0.007	0	0	0	0	0	0	0	0	0	0	0	0	0	0.075	0	0	0	0	0	0
OTU1268	-4.549	6.67	0.00403	0.0580903	Depleted	Bacteria	Firmicutes	Clostridia	Clostridiales	Unassigned	Unassigned	0	0.013	0	0	0	0	0	0	0	0	0	0.002	0.016	0	0	0	0	0	0.054	0	0	0.059
OTU1045	3.541	6.281	0.00405436	0.0580903	Enriched	Bacteria	Firmicutes	Clostridia	Clostridiales	Ruminococcaceae	Unassigned	0.006	0	0.01	0.002	0.016	0	0	0	0	0.002	0.015	0.02	0	0	0.002	0	0	0	0	0	0	0
OTU1482	-4.168	6.103	0.00419608	0.0594202	Depleted	Bacteria	Firmicutes	Clostridia	Clostridiales	Ruminococcaceae	Ruminococcus	0	0.005	0	0	0	0	0	0	0	0	0	0	0	0.036	0	0.005	0	0	0	0	0.007	0
OTU239	3.879	6.438	0.00421516	0.0594202	Enriched	Bacteria	Firmicutes	Bacilli	Lactobacillales	Lactobacillaceae	Lactobacillus	0.008	0	0.002	0.005	0.002	0	0	0	0.008	0	0.002	0.058	0	0	0.002	0	0	0	0	0	0	0
OTU1296	-4.688	6.315	0.0043503	0.0608346	Depleted	Bacteria	Firmicutes	Clostridia	Clostridiales	Unassigned	Unassigned	0	0.007	0	0	0	0	0	0	0	0	0	0	0	0	0	0	0.034	0.038	0	0	0	0
OTU369	-3.063	10.976	0.00464353	0.0644197	Depleted	Bacteria	Bacteroidetes	Bacteroidia	Bacteroidales	Prevotellaceae	Prevotella	0.047	0.34	0.007	0	0.004	0.016	0.004	0.307	0	0.11	0.02	0.004	0.009	0.547	0.14	0.331	1.114	1.021	0.057	0	0.162	0.016
OTU374	4.336	9.3	0.00474942	0.0648816	Enriched	Bacteria	Bacteroidetes	Unassigned	Unassigned	Unassigned	Unassigned	0.118	0.006	0.108	0.605	0.319	0.044	0.02	0	0	0	0	0.084	0.002	0	0	0	0	0	0.06	0	0	0
OTU812	2.895	9.17	0.00475106	0.0648816	Enriched	Bacteria	Firmicutes	Unassigned	Unassigned	Unassigned	Unassigned	0.08	0.012	0.005	0.012	0.009	0.016	0.075	0.018	0.531	0.004	0.084	0.048	0.011	0.025	0.002	0	0	0	0.009	0.047	0.022	0.002
OTU593	-2.997	6.608	0.00484407	0.0656391	Depleted	Bacteria	Bacteroidetes	Bacteroidia	Bacteroidales	Prevotellaceae	Prevotella	0.001	0.009	0.005	0	0	0	0	0	0	0.006	0	0	0.005	0.005	0.034	0	0.003	0.005	0.026	0	0.01	0.005
OTU494	3.378	11.489	0.00499553	0.0671707	Enriched	Bacteria	Bacteroidetes	Unassigned	Unassigned	Unassigned	Unassigned	0.556	0.053	0.187	3.295	0.717	0.002	0.066	0	0.208	0.061	0.005	1.022	0.152	0.007	0	0	0	0.013	0.074	0.118	0	0.169
OTU1598	-2.472	8.369	0.00510756	0.0681528	Depleted	Bacteria	Firmicutes	Clostridia	Clostridiales	Lachnospiraceae	Clostridium_XlVa	0.009	0.049	0.012	0.031	0.007	0.002	0	0.018	0	0	0.01	0.014	0.011	0.027	0.034	0.002	0.166	0.165	0.02	0.013	0.035	0.014
OTU467	5.398	6.684	0.00523457	0.068813	Enriched	Bacteria	Bacteroidetes	Flavobacteriia	Flavobacteriales	Flavobacteriaceae	Flavobacterium	0.011	0	0	0	0.106	0	0	0	0	0	0	0	0	0	0	0	0	0	0	0	0	0
OTU459	3.006	6.778	0.00523577	0.068813	Enriched	Bacteria	Bacteroidetes	Bacteroidia	Bacteroidales	Prevotellaceae	Prevotella	0.012	0.001	0.031	0.019	0.027	0	0.016	0	0.002	0.006	0	0.022	0	0	0	0	0	0	0.009	0.002	0	0.002
OTU1034	2.711	9.458	0.0054238	0.0704749	Enriched	Bacteria	Firmicutes	Clostridia	Clostridiales	Lachnospiraceae	Unassigned	0.121	0.017	0.079	0.571	0.009	0.054	0.004	0.013	0.154	0.187	0.01	0.131	0.02	0	0.002	0	0.018	0.033	0.003	0.075	0	0.014
OTU171	5.367	6.666	0.00544286	0.0704749	Enriched	Bacteria	Proteobacteria	Betaproteobacteria	Burkholderiales	Comamonadaceae	Unassigned	0.01	0	0	0	0.103	0	0	0	0	0	0	0	0	0	0	0	0	0	0	0	0	0
OTU42	2.469	8.854	0.00559463	0.0717391	Enriched	Bacteria	Proteobacteria	Unassigned	Unassigned	Unassigned	Unassigned	0.071	0.011	0.1	0.174	0.117	0.068	0.072	0.02	0.051	0.002	0.01	0.101	0.029	0	0.022	0.011	0	0	0	0.015	0.025	0.012
OTU936	2.835	5.755	0.00562257	0.0717391	Enriched	Bacteria	Firmicutes	Clostridia	Clostridiales	Unassigned	Unassigned	0.002	0	0	0.002	0.002	0.005	0.004	0.003	0	0	0.002	0	0	0	0	0	0	0	0	0	0	0
OTU460	-5.599	7.347	0.00573497	0.0724669	Depleted	Bacteria	Bacteroidetes	Bacteroidia	Bacteroidales	Prevotellaceae	Prevotella	0	0.02	0.002	0	0	0	0	0	0	0	0	0	0	0	0	0	0	0	0	0.201	0	0
OTU1738	3.431	6.183	0.00579877	0.0724669	Enriched	Bacteria	Firmicutes	Clostridia	Clostridiales	Clostridiales_Incertae_Sedis_XI	Anaerococcus	0.006	0	0.005	0.036	0.009	0	0.002	0	0	0	0.005	0.002	0	0	0	0	0	0	0	0	0	0.002
OTU1362	-2.214	7.664	0.00580399	0.0724669	Depleted	Bacteria	Firmicutes	Clostridia	Clostridiales	Lachnospiraceae	Blautia	0.006	0.024	0.002	0.022	0.004	0	0.009	0.005	0	0.002	0.015	0.002	0.014	0.018	0.012	0.048	0.047	0.023	0.028	0	0.037	0.014
OTU1483	2.748	6.304	0.00584678	0.0724834	Enriched	Bacteria	Firmicutes	Clostridia	Clostridiales	Unassigned	Unassigned	0.007	0.001	0.014	0.022	0.007	0.007	0.002	0.008	0	0	0.002	0.004	0.005	0	0	0	0	0	0	0	0	0.002
OTU1498	4.738	6.361	0.00592894	0.0727347	Enriched	Bacteria	Firmicutes	Clostridia	Clostridiales	Lachnospiraceae	Unassigned	0.008	0	0	0	0	0	0.075	0	0	0	0	0.006	0	0	0	0	0	0	0	0	0	0
OTU379	-4.63	6.285	0.00595027	0.0727347	Depleted	Bacteria	Bacteroidetes	Unassigned	Unassigned	Unassigned	Unassigned	0	0.006	0	0	0	0	0	0	0	0	0	0	0	0	0	0	0.003	0	0	0	0.06	0
OTU837	-4.108	7.88	0.00601527	0.0730187	Depleted	Bacteria	Firmicutes	Clostridia	Clostridiales	Ruminococcaceae	Unassigned	0.002	0.038	0	0.017	0	0	0	0.003	0	0.002	0	0	0	0.002	0	0	0.14	0.216	0.009	0.009	0	0
OTU580	-3.194	5.817	0.00624548	0.0752904	Depleted	Bacteria	Bacteroidetes	Bacteroidia	Bacteroidales	Prevotellaceae	Prevotella	0	0.002	0	0	0	0	0	0	0	0	0	0	0	0	0.002	0	0.008	0.01	0.003	0	0	0
OTU919	4.07	6.077	0.00641784	0.0766025	Enriched	Bacteria	Firmicutes	Clostridia	Clostridiales	Ruminococcaceae	Unassigned	0.004	0	0	0.012	0	0	0	0	0.008	0	0	0.024	0	0	0	0	0	0	0	0	0	0
OTU709	3.51	7.25	0.00648368	0.0766025	Enriched	Bacteria	Actinobacteria	Actinobacteria	Bifidobacteriales	Bifidobacteriaceae	Bifidobacterium	0.02	0.001	0.002	0.007	0	0.002	0	0	0	0	0.03	0.161	0.002	0.002	0	0.002	0.003	0	0.003	0.002	0	0
OTU1521	-4.618	6.261	0.0064858	0.0766025	Depleted	Bacteria	Firmicutes	Clostridia	Clostridiales	Lachnospiraceae	Unassigned	0	0.004	0	0	0	0	0	0	0	0	0	0	0	0	0	0.041	0	0	0	0	0.002	0
OTU8	2.542	10.82	0.00655343	0.0768818	Enriched	Bacteria	Unassigned	Unassigned	Unassigned	Unassigned	Unassigned	0.291	0.045	0.445	0.186	0.195	0.033	0.149	0.18	0.862	0.311	0.037	0.509	0.009	0	0.061	0	0.026	0.038	0.003	0.297	0.007	0.007
OTU533	-4.3	6.55	0.00660628	0.0769852	Depleted	Bacteria	Bacteroidetes	Bacteroidia	Bacteroidales	Prevotellaceae	Prevotella	0	0.01	0	0	0	0	0	0.003	0	0	0	0	0	0.009	0	0	0.049	0.041	0	0	0	0
OTU14	2.087	12.312	0.00672277	0.0777857	Enriched	Bacteria	Spirochaetes	Spirochaetia	Spirochaetales	Spirochaetaceae	Treponema	0.703	0.184	0.325	0.194	0.27	4.412	0.147	0.436	0.188	0.457	0.344	0.255	0.072	0.056	0.152	0.043	0.187	0.335	0.253	0.357	0.299	0.089
OTU439	3.676	7.889	0.00678186	0.0777857	Enriched	Bacteria	Bacteroidetes	Unassigned	Unassigned	Unassigned	Unassigned	0.037	0.002	0.007	0.23	0.04	0.016	0	0	0.06	0	0	0.012	0	0	0.012	0	0.003	0.008	0	0	0	0
OTU1467	-3.11	6.594	0.00680847	0.0777857	Depleted	Bacteria	Firmicutes	Clostridia	Clostridiales	Lachnospiraceae	Unassigned	0.001	0.009	0.005	0	0.002	0	0	0	0	0	0	0.002	0	0.002	0.01	0	0.029	0.033	0.009	0	0.012	0
OTU240	-3.849	5.99	0.00690908	0.0784226	Depleted	Bacteria	Unassigned	Unassigned	Unassigned	Unassigned	Unassigned	0	0.003	0	0	0	0	0	0	0	0	0	0	0	0.005	0	0.005	0	0	0	0	0.025	0
OTU640	2.419	7.521	0.00712243	0.0799579	Enriched	Bacteria	Bacteroidetes	Bacteroidia	Bacteroidales	Porphyromonadaceae	Unassigned	0.026	0.004	0.12	0.031	0.029	0	0.036	0.005	0	0.03	0.005	0.008	0.007	0.002	0.01	0	0.003	0.003	0.009	0.002	0	0.007
OTU1383	-1.668	10.767	0.00716483	0.0799579	Depleted	Bacteria	Firmicutes	Clostridia	Clostridiales	Ruminococcaceae	Faecalibacterium	0.088	0.258	0.06	0.232	0.022	0.082	0.059	0.178	0.028	0.073	0.104	0.04	0.172	0.334	0.192	0.07	0.342	0.32	0.404	0.273	0.291	0.176
OTU641	-2.409	6.71	0.00718157	0.0799579	Depleted	Bacteria	Bacteroidetes	Bacteroidia	Bacteroidales	Unassigned	Unassigned	0.002	0.01	0	0.005	0	0	0	0	0.004	0	0.002	0.006	0.014	0.005	0.005	0.02	0.013	0.003	0.023	0.002	0	0.014
OTU785	-5.561	8.964	0.00730874	0.080415	Depleted	Bacteria	Actinobacteria	Actinobacteria	Coriobacteriales	Coriobacteriaceae	Unassigned	0.002	0.057	0	0	0	0	0	0	0	0	0.017	0.002	0	0	0	0.568	0	0.003	0	0	0	0
OTU25	-2.49	11.897	0.00734792	0.080415	Depleted	Bacteria	Bacteroidetes	Bacteroidia	Bacteroidales	Prevotellaceae	Prevotella	0.107	0.53	0.155	0.007	0.038	0.473	0.005	0.205	0.004	0.099	0.057	0.022	0.091	0.319	2.644	0.477	0.92	0.454	0.031	0.017	0.301	0.042
OTU649	-2.993	5.773	0.00737514	0.080415	Depleted	Bacteria	Bacteroidetes	Bacteroidia	Bacteroidales	Porphyromonadaceae	Unassigned	0	0.002	0	0	0	0	0	0	0	0	0	0	0	0	0	0.002	0	0	0.009	0.002	0	0.007
OTU512	-2.787	7.231	0.00744489	0.080415	Depleted	Bacteria	Bacteroidetes	Bacteroidia	Bacteroidales	Prevotellaceae	Prevotella	0.003	0.018	0.002	0.007	0.013	0	0	0	0	0	0	0.002	0.018	0.043	0.064	0	0.016	0.01	0.006	0	0.007	0.012
OTU457	-2.972	8.221	0.00745265	0.080415	Depleted	Bacteria	Bacteroidetes	Bacteroidia	Bacteroidales	Prevotellaceae	Prevotella	0.006	0.043	0	0.007	0	0.007	0.009	0.023	0	0	0.015	0	0.005	0.163	0.135	0.005	0.073	0.025	0.009	0	0.012	0
OTU942	2.259	8.077	0.00758726	0.0811445	Enriched	Bacteria	Firmicutes	Clostridia	Clostridiales	Ruminococcaceae	Unassigned	0.038	0.007	0.053	0.012	0.061	0	0.013	0.005	0.019	0.012	0.047	0.161	0.007	0.018	0.017	0.005	0.003	0	0.009	0.002	0.007	0.005
OTU1026	-2.027	7.853	0.00765637	0.0811445	Depleted	Bacteria	Firmicutes	Clostridia	Clostridiales	Lachnospiraceae	Clostridium_XlVa	0.008	0.03	0.014	0.01	0	0	0.009	0.02	0.004	0.012	0.005	0.006	0.023	0.007	0.02	0	0.044	0.041	0.043	0.073	0.015	0.035
OTU173	4.21	6.871	0.00765952	0.0811445	Enriched	Bacteria	Firmicutes	Erysipelotrichia	Erysipelotrichales	Erysipelotrichaceae	Sharpea	0.017	0	0	0	0	0	0.002	0.005	0	0	0.159	0.002	0	0.002	0	0	0	0	0	0	0.002	0
OTU314	4.636	6.305	0.00783474	0.0825007	Enriched	Bacteria	Unassigned	Unassigned	Unassigned	Unassigned	Unassigned	0.007	0	0	0.002	0	0	0	0	0	0	0	0.064	0	0	0	0	0	0	0	0	0	0
OTU1526	3.469	5.892	0.00805503	0.0843126	Enriched	Bacteria	Firmicutes	Clostridia	Clostridiales	Ruminococcaceae	Unassigned	0.003	0	0.002	0	0	0.012	0	0	0	0.002	0.012	0	0	0	0	0	0	0	0	0	0	0
OTU1496	2.676	6.496	0.00837991	0.087191	Enriched	Bacteria	Proteobacteria	Epsilonproteobacteria	Campylobacterales	Helicobacteraceae	Helicobacter	0.007	0.001	0.002	0.002	0.002	0.009	0	0.003	0.026	0.018	0	0.01	0.002	0	0	0.002	0.003	0.003	0	0	0	0
OTU845	-2.772	6.429	0.0086733	0.0897097	Depleted	Bacteria	Firmicutes	Clostridia	Clostridiales	Ruminococcaceae	Butyricicoccus	0.001	0.008	0	0	0	0	0	0.005	0.002	0.002	0	0	0.002	0.029	0.002	0	0	0	0.023	0.006	0.012	0.002
OTU913	-4.199	6.119	0.00873679	0.0898347	Depleted	Bacteria	Firmicutes	Unassigned	Unassigned	Unassigned	Unassigned	0	0.005	0	0	0	0	0	0	0	0	0	0	0	0.045	0	0	0	0	0	0	0.007	0
OTU303	-3.75	5.955	0.00896729	0.0916656	Depleted	Bacteria	Firmicutes	Negativicutes	Selenomonadales	Veillonellaceae	Megasphaera	0	0.003	0	0	0	0	0	0	0	0	0	0	0	0	0	0.018	0.003	0.005	0	0	0	0
OTU1182	-3.701	7.264	0.00930259	0.0945403	Depleted	Bacteria	Firmicutes	Clostridia	Clostridiales	Lachnospiraceae	Unassigned	0.001	0.021	0	0	0	0	0.005	0	0.004	0.004	0	0	0	0.063	0.054	0	0	0	0.082	0.006	0	0
OTU199	-4.072	6.409	0.00951058	0.0960954	Depleted	Bacteria	Firmicutes	Negativicutes	Selenomonadales	Veillonellaceae	Megasphaera	0	0.007	0	0	0	0	0	0	0	0	0.002	0	0	0	0	0.016	0	0.015	0	0	0.037	0
OTU41	-1.959	12.326	0.00980497	0.0985005	Depleted	Bacteria	Bacteroidetes	Unassigned	Unassigned	Unassigned	Unassigned	0.207	0.852	0.139	0.07	0.186	0.536	0.142	0.446	0.043	0.081	0.382	0.046	1.01	5.018	0.511	0.225	0.43	0.264	0.102	0.113	0.501	0.35
OTU1250	2.147	9.086	0.00997442	0.0996302	Enriched	Bacteria	Firmicutes	Unassigned	Unassigned	Unassigned	Unassigned	0.079	0.016	0.024	0.012	0.034	0.073	0.33	0.015	0.203	0.026	0.057	0.018	0.027	0.002	0.017	0.043	0.013	0.018	0	0.002	0.017	0.019
OTU628	3.313	8.287	0.0102855	0.102153	Enriched	Bacteria	Bacteroidetes	Unassigned	Unassigned	Unassigned	Unassigned	0.05	0.005	0	0.194	0.007	0	0.014	0	0.062	0.004	0.002	0.215	0.036	0	0	0	0	0.003	0	0.002	0	0.012
OTU1167	1.98	10.268	0.0105364	0.104055	Enriched	Bacteria	Firmicutes	Clostridia	Clostridiales	Ruminococcaceae	Unassigned	0.181	0.044	0.194	0.048	0.29	0.6	0.1	0.023	0.056	0.148	0.332	0.016	0.007	0.011	0.017	0.036	0.088	0.043	0.026	0.124	0.072	0.012
OTU220	3.826	5.993	0.0107647	0.105712	Enriched	Bacteria	Firmicutes	Bacilli	Lactobacillales	Aerococcaceae	Unassigned	0.004	0	0	0.007	0.027	0	0.002	0	0	0	0	0	0	0	0	0	0	0	0	0	0	0
OTU531	-2.698	6.251	0.0109729	0.106801	Depleted	Bacteria	Bacteroidetes	Bacteroidia	Bacteroidales	Prevotellaceae	Prevotella	0.001	0.006	0.002	0	0	0	0	0.003	0	0	0	0.002	0.009	0.005	0	0	0.026	0.013	0	0.002	0	0.005
OTU1700	4.244	6.14	0.0109978	0.106801	Enriched	Bacteria	Firmicutes	Clostridia	Clostridiales	Peptoniphilaceae	Unassigned	0.005	0	0	0.036	0.018	0	0	0	0	0	0	0	0	0	0	0	0	0	0	0	0	0
OTU1445	-2.349	6.888	0.0111553	0.107731	Depleted	Bacteria	Firmicutes	Clostridia	Clostridiales	Lachnospiraceae	Unassigned	0.003	0.012	0.01	0.002	0.002	0	0.004	0	0	0	0.007	0	0	0.045	0.02	0.011	0.008	0.013	0.014	0	0.005	0.005
OTU824	-3.624	7.967	0.011845	0.113513	Depleted	Bacteria	Firmicutes	Clostridia	Clostridiales	Unassigned	Unassigned	0.003	0.034	0	0	0	0	0	0	0	0	0.035	0	0	0.023	0.057	0.03	0.01	0.01	0	0.002	0.204	0
OTU77	4.196	6.119	0.0118838	0.113513	Enriched	Bacteria	Proteobacteria	Gammaproteobacteria	Xanthomonadales	Xanthomonadaceae	Wohlfahrtiimonas	0.005	0	0	0.017	0.031	0	0	0	0	0	0	0	0	0	0	0	0	0	0	0	0	0
OTU1307	3.644	5.941	0.0122309	0.115723	Enriched	Bacteria	Firmicutes	Clostridia	Clostridiales	Ruminococcaceae	Unassigned	0.003	0	0	0.01	0	0	0	0	0	0.002	0	0.022	0	0	0	0	0	0	0	0	0	0
OTU1295	-2.433	6.514	0.01231	0.115723	Depleted	Bacteria	Firmicutes	Clostridia	Clostridiales	Lachnospiraceae	Unassigned	0.001	0.008	0.002	0	0	0	0.002	0.01	0	0	0	0	0.007	0.009	0	0.016	0.005	0.005	0.017	0	0.015	0.002
OTU1354	2.45	6.743	0.0123138	0.115723	Enriched	Bacteria	Firmicutes	Clostridia	Clostridiales	Lachnospiraceae	Unassigned	0.012	0.001	0.01	0.034	0.002	0.005	0.034	0.005	0.002	0	0.012	0.012	0	0	0.007	0.002	0	0	0	0	0.005	0
OTU1264	5.135	7.851	0.0125207	0.117039	Enriched	Bacteria	Firmicutes	Clostridia	Clostridiales	Ruminococcaceae	Ruminococcus	0.028	0.001	0	0	0	0.283	0	0	0	0	0	0	0	0	0	0	0	0.003	0	0	0.005	0
OTU1656	3.669	5.945	0.0127323	0.118383	Enriched	Bacteria	Firmicutes	Clostridia	Clostridiales	Clostridiaceae_1	Clostridium_sensu_stricto	0.003	0	0.007	0	0.022	0	0	0	0.002	0	0	0	0	0	0	0	0	0	0	0	0	0
OTU211	-3.255	5.829	0.0128144	0.118516	Depleted	Bacteria	Unassigned	Unassigned	Unassigned	Unassigned	Unassigned	0	0.002	0	0	0	0	0	0	0	0	0	0	0	0	0	0.009	0.003	0	0	0	0.007	0
OTU94	-2.231	9.408	0.0129287	0.118944	Depleted	Bacteria	Proteobacteria	Gammaproteobacteria	Enterobacteriales	Enterobacteriaceae	Escherichia/Shigella	0.022	0.102	0.026	0.044	0	0.054	0.004	0.03	0.011	0.026	0.017	0.012	0.007	0.513	0.032	0.027	0.003	0.015	0.02	0.295	0.107	0.005
OTU117	-2.572	7.807	0.0130057	0.119026	Depleted	Bacteria	Firmicutes	Bacilli	Lactobacillales	Lactobacillaceae	Lactobacillus	0.006	0.034	0	0.015	0	0	0.002	0.003	0.004	0	0.027	0.006	0.005	0.007	0.02	0.005	0.026	0.028	0.245	0	0.002	0.005
OTU23	-1.973	12.469	0.0134121	0.122106	Depleted	Bacteria	Bacteroidetes	Bacteroidia	Bacteroidales	Prevotellaceae	Prevotella	0.255	0.826	0.165	0.051	0.254	0	0.03	0.634	0.008	0.447	0.652	0.312	0.87	0.669	2.717	0.39	0.822	0.683	0.81	0.19	0.242	0.864
OTU1490	2.163	6.112	0.013769	0.124211	Enriched	Bacteria	Firmicutes	Clostridia	Clostridiales	Ruminococcaceae	Acetivibrio	0.004	0.001	0.01	0.005	0.009	0.002	0.004	0.005	0.004	0	0.002	0.002	0.005	0	0	0	0	0	0	0.002	0	0
OTU895	3.325	5.855	0.0137855	0.124211	Enriched	Bacteria	Unassigned	Unassigned	Unassigned	Unassigned	Unassigned	0.003	0	0	0.01	0	0	0.005	0	0	0	0	0.012	0	0	0	0	0	0	0	0	0	0
OTU1330	-3.951	6.022	0.0141762	0.127077	Depleted	Bacteria	Firmicutes	Clostridia	Clostridiales	Ruminococcaceae	Unassigned	0	0.004	0	0	0	0	0	0	0	0	0	0	0	0	0.002	0	0	0	0	0	0.035	0
OTU126	4.395	7.396	0.0144115	0.128396	Enriched	Bacteria	Proteobacteria	Deltaproteobacteria	Desulfovibrionales	Desulfovibrionaceae	Desulfovibrio	0.026	0.001	0	0	0	0.019	0.235	0	0	0	0.007	0	0	0.009	0	0	0	0	0	0	0	0
OTU285	-2.678	8.535	0.0144702	0.128396	Depleted	Bacteria	Firmicutes	Erysipelotrichia	Erysipelotrichales	Erysipelotrichaceae	Clostridium_XVIII	0.008	0.062	0	0	0	0	0.034	0.003	0.034	0.012	0	0	0.086	0.145	0.005	0	0.008	0.01	0.051	0.021	0.04	0.258
OTU218	-3.035	5.782	0.0146188	0.129059	Depleted	Bacteria	Proteobacteria	Betaproteobacteria	Burkholderiales	Sutterellaceae	Sutterella	0	0.002	0	0	0	0	0	0	0	0	0	0	0	0.011	0.002	0.005	0	0	0	0	0	0
OTU766	-4.788	13.855	0.0149981	0.131023	Depleted	Bacteria	Actinobacteria	Actinobacteria	Coriobacteriales	Coriobacteriaceae	Olsenella	0.125	1.799	0	0.005	0	0	0.014	0.013	0.002	0	1.194	0.022	0	0.007	0	17.972	0.005	0	0	0.002	0.002	0
OTU811	2.039	8.871	0.0150645	0.131023	Enriched	Bacteria	Firmicutes	Unassigned	Unassigned	Unassigned	Unassigned	0.076	0.017	0.146	0.005	0.047	0.009	0.038	0.058	0.051	0.104	0.287	0.016	0.048	0.005	0	0.009	0.003	0	0.02	0.009	0.01	0.073
OTU1600	2.718	8.003	0.0150897	0.131023	Enriched	Bacteria	Firmicutes	Clostridia	Clostridiales	Lachnospiraceae	Clostridium_XlVa	0.037	0.005	0.139	0.012	0.193	0	0.004	0.008	0.008	0.002	0	0.006	0.005	0	0.005	0	0	0	0.009	0.021	0.002	0.009
OTU960	2.871	6.048	0.0151411	0.131023	Enriched	Bacteria	Firmicutes	Clostridia	Unassigned	Unassigned	Unassigned	0.004	0	0.002	0.002	0.009	0.014	0.004	0	0	0	0.005	0	0	0	0	0.002	0	0	0	0	0	0
OTU4	1.89	12.669	0.0153511	0.132186	Enriched	Bacteria	Firmicutes	Bacilli	Lactobacillales	Lactobacillaceae	Lactobacillus	0.968	0.255	0.727	0.671	0.959	0.026	0.117	0.505	2.578	0.073	0.625	3.4	0.186	0.493	0.644	0.036	0.091	0.117	0.162	0.408	0.286	0.127
OTU209	3.977	6.044	0.0155641	0.133363	Enriched	Bacteria	Firmicutes	Bacilli	Bacillales	Planococcaceae	Lysinibacillus	0.004	0	0	0.031	0.013	0	0	0	0	0	0	0	0	0	0	0	0	0	0	0	0	0
OTU157	-2.784	6.532	0.0157783	0.134511	Depleted	Bacteria	Unassigned	Unassigned	Unassigned	Unassigned	Unassigned	0.001	0.007	0	0	0	0	0.004	0.008	0	0	0	0	0.002	0.009	0	0.027	0.003	0.003	0	0	0.017	0.012
OTU1440	-2.673	7.253	0.015852	0.134511	Depleted	Bacteria	Firmicutes	Clostridia	Clostridiales	Lachnospiraceae	Unassigned	0.003	0.018	0	0	0	0	0	0.013	0	0.014	0.005	0	0.009	0.014	0.02	0.002	0.008	0.003	0.003	0	0.115	0.005
OTU653	4.553	6.259	0.0160995	0.135878	Enriched	Bacteria	Bacteroidetes	Bacteroidia	Bacteroidales	Porphyromonadaceae	Unassigned	0.005	0	0	0	0	0	0	0	0.049	0	0	0	0	0	0	0	0	0	0	0	0	0
OTU920	2.429	5.68	0.0161686	0.135878	Enriched	Bacteria	Firmicutes	Clostridia	Clostridiales	Ruminococcaceae	Unassigned	0.001	0	0.002	0.002	0	0.002	0.004	0	0	0	0	0.002	0	0	0	0	0	0	0	0	0	0
OTU260	-2.376	10.99	0.0166477	0.137739	Depleted	Bacteria	Firmicutes	Negativicutes	Selenomonadales	Veillonellaceae	Megasphaera	0.067	0.294	0.014	0	0.022	0.136	0.077	0.185	0	0.01	0.221	0.008	0.161	0.084	0.145	0.629	0.238	0.452	0.003	0	0.954	0.272
OTU1685	2.702	6.817	0.0166479	0.137739	Enriched	Bacteria	Firmicutes	Clostridia	Clostridiales	Unassigned	Unassigned	0.01	0.002	0.005	0.005	0.004	0.005	0	0	0.066	0.004	0	0.012	0.005	0.002	0	0	0	0	0	0.006	0	0.002
OTU26	-2.207	13.517	0.0166928	0.137739	Depleted	Bacteria	Bacteroidetes	Bacteroidia	Bacteroidales	Prevotellaceae	Prevotella	0.478	1.998	0.026	0.068	0.045	0.119	0.344	2.093	0.006	0.851	1.222	0.006	0.87	3.762	0.302	0.306	6.671	6.421	0.486	0.03	0.286	0.845
OTU646	-2.554	6.689	0.0167052	0.137739	Depleted	Bacteria	Bacteroidetes	Bacteroidia	Bacteroidales	Porphyromonadaceae	Unassigned	0.002	0.01	0	0	0	0	0.004	0.003	0	0.006	0.005	0	0.005	0.038	0.022	0	0	0	0	0.011	0.015	0.007
OTU149	-3.319	6.103	0.0170115	0.139606	Depleted	Bacteria	Firmicutes	Negativicutes	Selenomonadales	Veillonellaceae	Megamonas	0	0.005	0	0	0	0	0	0	0	0	0.002	0	0	0	0	0.002	0.018	0.023	0	0	0.002	0
OTU1254	-1.881	9.46	0.0171419	0.140019	Depleted	Bacteria	Firmicutes	Clostridia	Clostridiales	Ruminococcaceae	Unassigned	0.031	0.107	0.002	0.024	0	0.014	0.02	0.018	0.032	0.083	0.114	0.002	0.172	0.043	0.025	0.061	0.117	0.234	0.031	0.03	0.04	0.322
OTU656	3.14	5.812	0.0175147	0.142238	Enriched	Bacteria	Bacteroidetes	Bacteroidia	Bacteroidales	Unassigned	Unassigned	0.002	0	0.005	0	0.009	0	0	0	0	0	0	0.008	0	0	0	0	0	0	0	0	0	0
OTU537	-3.195	6.528	0.0175764	0.142238	Depleted	Bacteria	Bacteroidetes	Bacteroidia	Bacteroidales	Prevotellaceae	Prevotella	0.001	0.01	0	0	0	0	0	0	0	0.008	0	0	0.002	0	0.005	0.007	0	0.005	0.074	0	0	0.002
OTU579	-2.572	6.042	0.0179326	0.14409	Depleted	Bacteria	Bacteroidetes	Bacteroidia	Bacteroidales	Prevotellaceae	Prevotella	0	0.004	0	0	0	0	0	0.003	0	0.002	0	0	0.007	0.002	0.002	0.005	0.018	0.003	0	0	0	0
OTU1343	-3.311	6.098	0.01797	0.14409	Depleted	Bacteria	Firmicutes	Clostridia	Clostridiales	Eubacteriaceae	Eubacterium	0	0.004	0	0.002	0	0	0	0	0	0	0	0	0	0	0	0.02	0.005	0.008	0.003	0	0	0
OTU1729	-4.312	6.134	0.0183242	0.146259	Depleted	Bacteria	Actinobacteria	Actinobacteria	Coriobacteriales	Coriobacteriaceae	Olsenella	0	0.003	0	0	0	0	0	0	0	0	0	0	0	0	0	0.034	0	0	0	0	0	0
OTU44	1.636	15.651	0.0187942	0.149329	Enriched	Bacteria	Bacteroidetes	Bacteroidia	Bacteroidales	Porphyromonadaceae	Unassigned	7.47	2.511	5.716	2.331	2.59	7.516	19.521	3.138	21.903	1.648	9.117	1.215	3.272	0.881	2.103	0.35	1.679	1.927	3.29	4.594	1.624	5.394
OTU762	3.809	5.992	0.0188853	0.149373	Enriched	Bacteria	Actinobacteria	Actinobacteria	Coriobacteriales	Coriobacteriaceae	Olsenella	0.004	0	0	0	0	0	0	0	0	0	0.032	0.01	0	0	0	0	0	0	0	0	0	0
OTU842	-2.628	5.706	0.0196635	0.154828	Depleted	Bacteria	Firmicutes	Clostridia	Clostridiales	Unassigned	Unassigned	0	0.002	0	0	0	0	0	0	0	0	0	0	0	0.002	0	0	0.005	0.008	0	0	0	0
OTU393	-2.027	12.264	0.0199339	0.156253	Depleted	Bacteria	Bacteroidetes	Bacteroidia	Bacteroidales	Prevotellaceae	Prevotella	0.205	0.678	1.081	0.007	0.236	0.192	0.025	0.297	0.032	0.032	0.146	0.004	0.043	0.316	1.096	1.396	1.322	1.262	0.455	0.019	0.75	0.12
OTU158	3.592	6.748	0.0203943	0.158731	Enriched	Bacteria	Unassigned	Unassigned	Unassigned	Unassigned	Unassigned	0.012	0.001	0	0.007	0	0	0	0	0.004	0	0	0.105	0	0	0	0	0	0.003	0.003	0	0	0.002
OTU594	-2.801	6.142	0.0204525	0.158731	Depleted	Bacteria	Bacteroidetes	Bacteroidia	Bacteroidales	Prevotellaceae	Prevotella	0.001	0.004	0	0	0	0	0	0.005	0	0	0	0	0.011	0.002	0.02	0	0.005	0.003	0	0	0.002	0
OTU909	-4.157	6.098	0.0205225	0.158731	Depleted	Bacteria	Firmicutes	Clostridia	Clostridiales	Ruminococcaceae	Clostridium_IV	0	0.004	0	0	0	0	0	0	0	0	0	0	0	0	0	0	0	0	0	0.041	0	0
OTU446	3.356	7.626	0.0208643	0.160665	Enriched	Bacteria	Bacteroidetes	Bacteroidia	Bacteroidales	Porphyromonadaceae	Parabacteroides	0.022	0.003	0	0.002	0.002	0.199	0	0	0	0	0.002	0.018	0.011	0.002	0	0.005	0	0	0	0	0	0.007
OTU783	3.087	5.799	0.0213196	0.16345	Enriched	Bacteria	Unassigned	Unassigned	Unassigned	Unassigned	Unassigned	0.002	0	0	0	0.002	0.009	0	0	0.006	0	0	0	0	0	0	0	0	0	0	0	0	0
OTU424	3.259	7.337	0.0217649	0.166128	Enriched	Bacteria	Bacteroidetes	Bacteroidia	Bacteroidales	Unassigned	Unassigned	0.023	0.002	0.017	0.087	0.02	0	0.023	0	0	0	0	0.08	0	0	0	0	0	0	0	0.015	0	0.002
OTU1325	-3.103	6.001	0.021859	0.166128	Depleted	Bacteria	Firmicutes	Clostridia	Clostridiales	Lachnospiraceae	Unassigned	0	0.003	0	0	0	0	0.002	0	0	0	0	0	0	0.002	0.02	0	0	0	0	0	0.005	0.005
OTU13	1.884	13.707	0.0220409	0.166435	Enriched	Bacteria	Firmicutes	Bacilli	Lactobacillales	Lactobacillaceae	Lactobacillus	2.101	0.54	1.545	4.808	1.62	0.035	0.013	3.559	4.03	0.112	0.466	4.82	0.351	0.325	1.469	0.032	0.881	0.675	0.87	0.263	0.284	0.249
OTU659	2.425	5.679	0.0220897	0.166435	Enriched	Bacteria	Firmicutes	Erysipelotrichia	Erysipelotrichales	Erysipelotrichaceae	Unassigned	0.001	0	0	0	0	0	0.002	0	0.004	0.002	0	0.004	0	0	0	0	0	0	0	0	0	0
OTU725	1.858	10.777	0.0222073	0.166603	Enriched	Bacteria	Firmicutes	Clostridia	Clostridiales	Unassigned	Unassigned	0.31	0.07	0.117	0.16	0.072	0.112	0.276	0.096	0.058	0.361	1.841	0.01	0.068	0.029	0.103	0.005	0.018	0.051	0.009	0.019	0.299	0.103
OTU979	2.918	6.034	0.0224905	0.167652	Enriched	Bacteria	Firmicutes	Clostridia	Clostridiales	Ruminococcaceae	Intestinimonas	0.004	0	0.007	0.012	0.002	0.014	0.002	0	0	0	0	0	0	0	0	0	0	0	0	0	0.002	0
OTU577	3.013	8.822	0.0225391	0.167652	Enriched	Bacteria	Bacteroidetes	Bacteroidia	Bacteroidales	Prevotellaceae	Unassigned	0.084	0.01	0.072	0.721	0.011	0.016	0	0.01	0	0	0.002	0.008	0.063	0.005	0	0	0	0	0.003	0.002	0	0.028
OTU87	-1.893	9.422	0.0228723	0.168738	Depleted	Bacteria	Unassigned	Unassigned	Unassigned	Unassigned	Unassigned	0.03	0.095	0.05	0.029	0.054	0.002	0	0.056	0.002	0.014	0.072	0.018	0.014	0.178	0.01	0.041	0.057	0.081	0.011	0.415	0.045	0.099
OTU969	2.897	5.76	0.0228781	0.168738	Enriched	Bacteria	Firmicutes	Clostridia	Clostridiales	Ruminococcaceae	Unassigned	0.002	0	0	0.005	0	0	0	0	0	0.002	0	0.012	0	0	0	0	0	0	0	0	0	0
OTU167	-2.514	7.091	0.0229924	0.168869	Depleted	Bacteria	Unassigned	Unassigned	Unassigned	Unassigned	Unassigned	0.003	0.017	0.01	0.01	0.002	0	0	0.003	0	0	0	0.004	0.005	0.09	0	0.009	0	0	0.026	0	0.012	0.026
OTU1667	2.87	5.755	0.0231703	0.168938	Enriched	Bacteria	Firmicutes	Clostridia	Clostridiales	Unassigned	Unassigned	0.002	0	0	0.015	0	0	0.004	0	0	0	0	0.002	0	0	0	0	0	0	0	0	0	0
OTU488	2.263	5.84	0.02325	0.168938	Enriched	Bacteria	Bacteroidetes	Bacteroidia	Bacteroidales	Porphyromonadaceae	Unassigned	0.002	0	0.002	0.002	0	0.002	0.002	0.005	0.006	0	0	0.002	0.002	0	0	0	0	0	0	0	0	0
OTU678	-2.641	6.295	0.0233905	0.168938	Depleted	Bacteria	Bacteroidetes	Bacteroidia	Bacteroidales	Porphyromonadaceae	Unassigned	0.001	0.006	0	0	0	0	0.005	0	0	0	0.002	0	0	0.005	0.012	0.002	0.021	0.015	0	0	0	0.002
OTU409	-2.085	11.241	0.0233975	0.168938	Depleted	Bacteria	Bacteroidetes	Bacteroidia	Bacteroidales	Prevotellaceae	Prevotella	0.085	0.371	0.005	0.017	0.011	0.375	0.063	0.304	0	0.043	0.022	0.01	0.235	0.391	0.774	0.025	1.428	0.526	0.102	0.021	0.085	0.124
OTU150	-2.251	9.728	0.0234852	0.168938	Depleted	Bacteria	Unassigned	Unassigned	Unassigned	Unassigned	Unassigned	0.032	0.131	0.026	0.01	0.004	0	0.124	0	0.004	0	0.146	0.008	0.016	0.014	0.002	0.064	0.409	0.353	0.173	0.203	0.062	0.009
OTU900	3.592	5.932	0.0239403	0.171507	Enriched	Bacteria	Firmicutes	Clostridia	Clostridiales	Ruminococcaceae	Unassigned	0.004	0	0	0	0	0	0.03	0	0	0	0.005	0	0	0	0	0	0	0	0	0	0	0
OTU254	4.207	6.12	0.0244559	0.173931	Enriched	Bacteria	Proteobacteria	Betaproteobacteria	Burkholderiales	Comamonadaceae	Comamonas	0.004	0	0	0	0.045	0	0	0	0	0	0	0	0	0	0	0	0	0	0	0	0	0
OTU1342	-2.411	5.672	0.0245773	0.173931	Depleted	Bacteria	Firmicutes	Clostridia	Clostridiales	Unassigned	Unassigned	0	0.001	0	0	0	0	0	0	0	0	0	0	0	0.002	0	0	0.005	0.005	0	0	0	0
OTU1731	-2.411	5.672	0.0245773	0.173931	Depleted	Bacteria	Firmicutes	Clostridia	Clostridiales	Ruminococcaceae	Unassigned	0	0.001	0	0	0	0	0	0	0	0	0	0	0	0.002	0	0	0.005	0.005	0	0	0	0
OTU1698	3.654	5.945	0.0249604	0.17593	Enriched	Bacteria	Firmicutes	Clostridia	Clostridiales	Ruminococcaceae	Unassigned	0.003	0	0	0.002	0	0	0	0	0	0	0	0.03	0	0	0	0	0	0	0	0	0	0
OTU1590	2.394	7.793	0.0252476	0.17724	Enriched	Bacteria	Firmicutes	Clostridia	Clostridiales	Clostridiaceae_1	Clostridium_sensu_stricto	0.027	0.006	0.014	0.027	0.043	0.016	0	0	0.09	0.012	0.01	0.06	0	0	0	0	0.018	0.02	0.014	0.004	0	0
OTU999	-2.317	5.655	0.0257174	0.179816	Depleted	Bacteria	Firmicutes	Unassigned	Unassigned	Unassigned	Unassigned	0	0.001	0	0	0	0	0	0	0	0	0	0	0.005	0	0	0	0	0	0	0	0.002	0.005
OTU1446	-2.411	5.672	0.0259871	0.180978	Depleted	Bacteria	Firmicutes	Clostridia	Clostridiales	Ruminococcaceae	Unassigned	0	0.001	0	0	0	0	0	0	0	0	0	0	0	0	0	0	0	0.003	0	0.006	0	0.002
OTU847	-1.785	6.969	0.0261938	0.181693	Depleted	Bacteria	Firmicutes	Clostridia	Clostridiales	Ruminococcaceae	Unassigned	0.004	0.013	0.002	0	0	0	0.02	0.008	0	0.004	0.002	0.002	0.016	0.032	0.002	0.005	0.021	0.013	0.006	0.002	0.025	0.009
OTU1311	-3.96	6.031	0.0262976	0.181693	Depleted	Bacteria	Firmicutes	Clostridia	Clostridiales	Ruminococcaceae	Unassigned	0	0.005	0	0	0	0	0	0	0	0	0	0	0	0	0	0	0	0	0.048	0	0	0
OTU1458	4.323	7.091	0.0265094	0.182001	Enriched	Bacteria	Firmicutes	Clostridia	Clostridiales	Lachnospiraceae	Unassigned	0.021	0	0	0	0	0	0	0.003	0	0	0.211	0	0	0	0.005	0	0	0	0	0	0	0
OTU1190	-2.379	5.667	0.0265504	0.182001	Depleted	Bacteria	Firmicutes	Clostridia	Clostridiales	Unassigned	Unassigned	0	0.001	0	0	0	0	0	0	0	0	0	0	0.002	0	0	0.002	0	0	0	0	0	0.007
OTU281	4.137	6.094	0.0267221	0.182462	Enriched	Bacteria	Proteobacteria	Gammaproteobacteria	Unassigned	Unassigned	Unassigned	0.004	0	0	0	0.043	0	0	0	0	0	0	0	0	0	0	0	0	0	0	0	0	0
OTU1705	2.687	5.723	0.0271084	0.184379	Enriched	Bacteria	Firmicutes	Clostridia	Clostridiales	Unassigned	Unassigned	0.002	0	0	0	0	0	0	0	0.006	0	0.007	0.002	0	0	0	0	0	0	0	0	0	0
OTU287	-3.177	5.812	0.0273946	0.185059	Depleted	Bacteria	Unassigned	Unassigned	Unassigned	Unassigned	Unassigned	0	0.002	0	0	0	0	0	0	0	0	0	0	0	0	0	0	0	0	0	0.017	0.002	0
OTU547	1.634	10.5	0.0274201	0.185059	Enriched	Bacteria	Bacteroidetes	Bacteroidia	Bacteroidales	Prevotellaceae	Prevotella	0.218	0.066	0.273	0.385	0.771	0.005	0.145	0.203	0.13	0.158	0.04	0.07	0.19	0.043	0.098	0.068	0.013	0.018	0.023	0.026	0.062	0.115
OTU710	-1.854	10.963	0.0277332	0.186452	Depleted	Bacteria	Firmicutes	Clostridia	Clostridiales	Lachnospiraceae	Clostridium_XlVa	0.093	0.336	0.199	0.019	0.09	0	0.169	0.048	0.03	0.227	0.027	0.117	0.231	0.447	0.26	0.009	0.029	0.023	1.865	0.019	0.179	0.296
OTU1349	-1.833	10.211	0.0284537	0.190554	Depleted	Bacteria	Firmicutes	Clostridia	Clostridiales	Ruminococcaceae	Clostridium_IV	0.056	0.181	0.108	0.196	0.022	0.002	0.034	0.033	0.008	0.049	0.027	0.078	0.011	0.047	0.4	0.011	0.06	0.086	1.075	0.021	0.075	0.026
OTU615	2.612	5.709	0.0285612	0.190554	Enriched	Bacteria	Bacteroidetes	Bacteroidia	Bacteroidales	Prevotellaceae	Prevotella	0.002	0	0.002	0	0	0	0	0	0	0	0.01	0.004	0	0	0	0	0	0	0	0	0	0
OTU839	1.943	7.478	0.0288059	0.190975	Enriched	Bacteria	Firmicutes	Clostridia	Clostridiales	Unassigned	Unassigned	0.019	0.005	0.005	0.015	0.002	0.066	0.016	0	0.041	0.022	0.005	0.02	0.002	0.011	0	0.005	0	0	0.006	0.002	0.015	0.012
OTU763	-2.963	6.037	0.0288596	0.190975	Depleted	Bacteria	Tenericutes	Mollicutes	Anaeroplasmatales	Anaeroplasmataceae	Anaeroplasma	0	0.004	0	0	0	0.002	0	0	0	0	0	0	0.011	0	0	0	0.003	0.025	0	0	0	0.002
OTU339	3.384	5.871	0.0289521	0.190975	Enriched	Bacteria	Unassigned	Unassigned	Unassigned	Unassigned	Unassigned	0.003	0	0	0.005	0	0	0	0	0	0	0	0.022	0	0	0	0	0	0	0	0	0	0
OTU327	-3.404	8.036	0.029341	0.192208	Depleted	Bacteria	Firmicutes	Negativicutes	Selenomonadales	Acidaminococcaceae	Succiniclasticum	0.004	0.029	0.007	0	0.004	0	0	0.028	0	0	0	0	0	0	0	0.191	0.013	0.036	0	0	0.052	0
OTU1348	2.281	5.661	0.029382	0.192208	Enriched	Bacteria	Unassigned	Unassigned	Unassigned	Unassigned	Unassigned	0.001	0	0.002	0.005	0.002	0	0	0	0.002	0	0	0	0	0	0	0	0	0	0	0	0	0
OTU1085	2.287	5.665	0.029469	0.192208	Enriched	Bacteria	Firmicutes	Clostridia	Clostridiales	Unassigned	Unassigned	0.001	0	0	0	0	0.005	0.002	0.003	0	0.002	0	0	0	0	0	0	0	0	0	0	0	0
OTU22	2.746	12.97	0.0296003	0.192347	Enriched	Bacteria	Spirochaetes	Spirochaetia	Spirochaetales	Spirochaetaceae	Treponema	1.336	0.223	3.004	0.068	9.735	0.056	0.009	0	0.019	0.02	0.171	0.282	0.616	0.002	0.025	0.002	0	0.025	0	0.385	0.04	1.132
OTU1448	2.444	8.885	0.0298884	0.1935	Enriched	Bacteria	Firmicutes	Clostridia	Clostridiales	Lachnospiraceae	Clostridium_XlVa	0.073	0.013	0.17	0.024	0.031	0	0.014	0.003	0.043	0.006	0	0.443	0	0.005	0.005	0	0.003	0.003	0.045	0.062	0	0.005
OTU233	-2.956	5.766	0.0308567	0.199031	Depleted	Bacteria	Unassigned	Unassigned	Unassigned	Unassigned	Unassigned	0	0.002	0	0	0	0	0	0	0	0	0	0	0	0.002	0	0	0	0	0.02	0	0	0
OTU1569	2.177	5.641	0.0312498	0.200308	NotSig	Bacteria	Firmicutes	Clostridia	Clostridiales	Ruminococcaceae	Clostridium_IV	0.001	0	0	0.002	0	0	0.004	0.003	0	0	0	0.002	0	0	0	0	0	0	0	0	0	0
OTU79	-2.071	11.234	0.0312838	0.200308	NotSig	Bacteria	Firmicutes	Negativicutes	Selenomonadales	Veillonellaceae	Unassigned	0.097	0.353	0.062	0	0.011	0.124	0	0.693	0	0.024	0.047	0.01	0.109	0.515	0.437	0.524	0.461	0.721	0.245	0.015	0.219	0.282
OTU1380	-1.557	9.983	0.0315079	0.200424	NotSig	Bacteria	Firmicutes	Clostridia	Clostridiales	Lachnospiraceae	Unassigned	0.055	0.146	0.01	0.075	0.009	0.028	0.075	0.16	0.004	0.016	0.169	0.008	0.346	0.084	0.128	0.091	0.148	0.145	0.191	0.013	0.164	0.15
OTU383	-2.869	10.175	0.0315313	0.200424	NotSig	Bacteria	Bacteroidetes	Bacteroidia	Bacteroidales	Prevotellaceae	Prevotella	0.029	0.164	0.007	0.005	0	0.042	0.011	0.157	0	0	0.064	0	0	0.002	0.049	0.447	0.332	0.17	0	0	0.643	0
OTU630	-2.734	8.197	0.0321443	0.20226	NotSig	Bacteria	Unassigned	Unassigned	Unassigned	Unassigned	Unassigned	0.007	0.049	0	0	0	0	0.005	0.038	0	0	0.03	0	0.057	0.287	0	0	0.013	0.008	0.048	0	0.007	0.068
OTU1282	-2.92	5.758	0.0321618	0.20226	NotSig	Bacteria	Unassigned	Unassigned	Unassigned	Unassigned	Unassigned	0	0.002	0	0	0	0	0	0	0	0	0	0	0	0	0	0	0	0	0	0.002	0.015	0
OTU627	2.219	8.623	0.0321672	0.20226	NotSig	Bacteria	Bacteroidetes	Bacteroidia	Bacteroidales	Unassigned	Unassigned	0.062	0.013	0.103	0.305	0.092	0.002	0.02	0.01	0.038	0.004	0.02	0.03	0.059	0	0	0	0.034	0.023	0	0	0	0.019
OTU606	-3.792	5.977	0.0323295	0.202552	NotSig	Bacteria	Bacteroidetes	Bacteroidia	Bacteroidales	Prevotellaceae	Prevotella	0	0.004	0	0	0	0	0	0	0	0	0	0	0	0	0	0	0	0	0.043	0	0	0
OTU944	-2.845	5.743	0.0325023	0.202907	NotSig	Bacteria	Firmicutes	Clostridia	Clostridiales	Unassigned	Unassigned	0	0.002	0	0	0	0	0	0	0	0	0	0	0	0	0.01	0	0	0	0.006	0	0	0
OTU1575	2.307	12.361	0.0326276	0.202964	NotSig	Bacteria	Firmicutes	Clostridia	Clostridiales	Lachnospiraceae	Clostridium_XlVa	0.881	0.173	3.511	0.179	4.431	0.009	0.158	0.17	0.023	0.104	0.027	0.197	0.342	0	0.111	0.005	0	0.003	0.111	0.626	0.06	0.477
OTU238	2.431	5.68	0.0334519	0.206786	NotSig	Bacteria	Unassigned	Unassigned	Unassigned	Unassigned	Unassigned	0.001	0	0	0.002	0	0	0	0	0	0	0.005	0.006	0	0	0	0	0	0	0	0	0	0
OTU1361	1.396	8.944	0.0334785	0.206786	NotSig	Bacteria	Firmicutes	Clostridia	Clostridiales	Lachnospiraceae	Unassigned	0.066	0.023	0.172	0.056	0.029	0.035	0.029	0.043	0.122	0.059	0.064	0.052	0.025	0.02	0.02	0.016	0.008	0.01	0.051	0.058	0.017	0.009
OTU598	-3.045	6.234	0.0337179	0.206851	NotSig	Bacteria	Bacteroidetes	Bacteroidia	Bacteroidales	Prevotellaceae	Prevotella	0.001	0.006	0	0	0	0	0	0.005	0	0	0	0	0	0.005	0.007	0	0.031	0.013	0	0	0	0
OTU765	-2.64	5.708	0.0337258	0.206851	NotSig	Bacteria	Tenericutes	Mollicutes	Unassigned	Unassigned	Unassigned	0	0.002	0	0	0	0	0	0	0	0	0	0	0.005	0	0	0	0	0	0	0	0	0.012
OTU996	2.722	11.576	0.0342803	0.208925	NotSig	Bacteria	Firmicutes	Clostridia	Clostridiales	Lachnospiraceae	Unassigned	0.491	0.073	0.014	0.165	0.004	0	0.194	0.066	1.166	0.004	0.04	3.259	0.061	0.056	0	0	0	0.003	0.006	0.532	0	0.068
OTU569	-2.223	6.94	0.034303	0.208925	NotSig	Bacteria	Bacteroidetes	Bacteroidia	Bacteroidales	Prevotellaceae	Prevotella	0.003	0.013	0.005	0.007	0.007	0	0	0.005	0	0.002	0.002	0	0.052	0.011	0.044	0	0.008	0	0	0.002	0	0.009
OTU1331	3.063	5.796	0.0344826	0.20929	NotSig	Bacteria	Unassigned	Unassigned	Unassigned	Unassigned	Unassigned	0.002	0	0	0	0	0	0.007	0	0	0	0.017	0	0	0	0	0	0	0	0	0	0	0
OTU518	2.458	5.685	0.0352109	0.212779	NotSig	Bacteria	Bacteroidetes	Unassigned	Unassigned	Unassigned	Unassigned	0.001	0	0	0	0	0.002	0.002	0	0	0	0	0.008	0	0	0	0	0	0	0	0	0	0
OTU482	3.051	5.793	0.0353008	0.212779	NotSig	Bacteria	Bacteroidetes	Bacteroidia	Bacteroidales	Prevotellaceae	Prevotella	0.002	0	0	0.01	0	0	0	0	0	0	0	0.012	0	0	0	0	0	0	0	0	0	0
OTU484	3.904	6.014	0.0354862	0.213161	NotSig	Bacteria	Bacteroidetes	Bacteroidia	Bacteroidales	Bacteroidaceae	Bacteroides	0.004	0	0	0	0.036	0	0	0	0	0	0	0	0	0	0	0	0	0	0	0	0	0
OTU373	-2.21	10.906	0.0358564	0.213954	NotSig	Bacteria	Bacteroidetes	Bacteroidia	Bacteroidales	Prevotellaceae	Prevotella	0.076	0.304	0.041	0.007	0.047	0	0.167	0.008	0.004	0.455	0.005	0.03	0.041	0.009	0.504	0.002	0.003	0.01	1.345	0.068	1.041	0.016
OTU259	-2.653	5.711	0.0358653	0.213954	NotSig	Bacteria	Unassigned	Unassigned	Unassigned	Unassigned	Unassigned	0	0.002	0	0	0	0	0	0	0	0	0	0	0.002	0	0	0	0	0	0	0	0	0.014
OTU1405	3.737	8.42	0.0359854	0.213954	NotSig	Bacteria	Firmicutes	Clostridia	Clostridiales	Lachnospiraceae	Clostridium_XlVa	0.058	0.003	0.399	0	0.106	0	0	0	0.073	0	0	0	0	0	0.02	0	0	0	0	0	0.012	0
OTU650	2.423	5.684	0.0371499	0.220129	NotSig	Bacteria	Bacteroidetes	Bacteroidia	Bacteroidales	Porphyromonadaceae	Butyricimonas	0.001	0	0	0.002	0.004	0.005	0	0	0	0	0	0	0	0	0	0	0	0	0	0	0	0
OTU43	2.342	5.665	0.0374021	0.220875	NotSig	Bacteria	Proteobacteria	Unassigned	Unassigned	Unassigned	Unassigned	0.001	0	0	0	0.002	0	0	0	0	0.008	0.002	0	0	0	0	0	0	0	0	0	0	0
OTU990	-2.442	5.676	0.0375515	0.22101	NotSig	Bacteria	Firmicutes	Clostridia	Clostridiales	Unassigned	Unassigned	0	0.001	0	0	0	0	0	0	0	0	0	0	0.007	0	0	0	0	0	0	0	0	0.007
OTU655	2.672	7.28	0.0377803	0.22161	NotSig	Bacteria	Bacteroidetes	Bacteroidia	Bacteroidales	Porphyromonadaceae	Butyricimonas	0.015	0.002	0.002	0	0.002	0.143	0.002	0	0	0.002	0.002	0	0	0.005	0.005	0.007	0	0.003	0	0.002	0.002	0
OTU1453	2.32	7.279	0.0380453	0.221851	NotSig	Bacteria	Firmicutes	Clostridia	Clostridiales	Lachnospiraceae	Unassigned	0.021	0.003	0.098	0	0.018	0.005	0.009	0.033	0	0.045	0	0	0.007	0	0	0	0.003	0.005	0	0.013	0	0.007
OTU1722	3.114	5.804	0.0382021	0.221851	NotSig	Bacteria	Firmicutes	Clostridia	Clostridiales	Unassigned	Unassigned	0.002	0	0	0.002	0.018	0	0	0	0	0	0	0	0	0	0	0	0	0	0	0	0	0
OTU1725	3.114	5.804	0.0382021	0.221851	NotSig	Bacteria	Firmicutes	Clostridia	Clostridiales	Clostridiales_Incertae_Sedis_XI	Unassigned	0.002	0	0	0.002	0.018	0	0	0	0	0	0	0	0	0	0	0	0	0	0	0	0	0
OTU133	-2.979	8.863	0.0387723	0.224417	NotSig	Bacteria	Firmicutes	Negativicutes	Selenomonadales	Acidaminococcaceae	Acidaminococcus	0.008	0.049	0	0.002	0	0.056	0	0.013	0	0	0.01	0	0.005	0.002	0.002	0.443	0.01	0.008	0	0	0.025	0
OTU550	-2.208	6.421	0.0391197	0.224761	NotSig	Bacteria	Bacteroidetes	Bacteroidia	Bacteroidales	Prevotellaceae	Prevotella	0.001	0.007	0.005	0.007	0.002	0	0	0	0	0	0	0	0	0.016	0.015	0.002	0.023	0.003	0.003	0	0	0.005
OTU1008	3.817	5.987	0.0392458	0.224761	NotSig	Bacteria	Firmicutes	Clostridia	Clostridiales	Lachnospiraceae	Cellulosilyticum	0.003	0	0	0	0.034	0	0	0	0	0	0	0	0	0	0	0	0	0	0	0	0	0
OTU485	3.817	5.987	0.0392458	0.224761	NotSig	Bacteria	Bacteroidetes	Bacteroidia	Bacteroidales	Prevotellaceae	Prevotella	0.003	0	0	0	0.034	0	0	0	0	0	0	0	0	0	0	0	0	0	0	0	0	0
OTU1060	-1.666	9.848	0.0393798	0.224761	NotSig	Bacteria	Firmicutes	Clostridia	Clostridiales	Lachnospiraceae	Unassigned	0.047	0.135	0.031	0.211	0.018	0.002	0.034	0.063	0.011	0.039	0.022	0.038	0.002	0.041	0.199	0.009	0.078	0.18	0.554	0.009	0.217	0.063
OTU262	2.91	5.763	0.0396368	0.224761	NotSig	Bacteria	Firmicutes	Bacilli	Lactobacillales	Aerococcaceae	Globicatella	0.002	0	0	0.007	0.011	0	0	0	0	0	0	0	0	0	0	0	0	0	0	0	0	0
OTU1450	-3.39	7.157	0.0397076	0.224761	NotSig	Bacteria	Firmicutes	Clostridia	Clostridiales	Lachnospiraceae	Unassigned	0.002	0.017	0.012	0.002	0.002	0	0	0	0	0	0	0	0	0	0	0	0	0.003	0	0.002	0.164	0
OTU957	2.896	5.76	0.0398588	0.224761	NotSig	Bacteria	Firmicutes	Clostridia	Clostridiales	Unassigned	Unassigned	0.002	0	0	0	0	0	0	0	0.009	0	0	0.006	0	0	0	0	0	0	0	0	0	0
OTU582	1.586	12.399	0.0398604	0.224761	NotSig	Bacteria	Bacteroidetes	Bacteroidia	Bacteroidales	Porphyromonadaceae	Unassigned	0.695	0.279	0.17	0.392	0.04	4.452	0.097	0.72	0.111	0.343	0.305	0.318	0.478	0.535	0.049	0.138	0.28	0.277	0.321	0.115	0.207	0.39
OTU85	2.935	5.767	0.0400415	0.225056	NotSig	Bacteria	Proteobacteria	Gammaproteobacteria	Pseudomonadales	Pseudomonadaceae	Unassigned	0.002	0	0	0.005	0.013	0	0	0	0	0	0	0	0	0	0	0	0	0	0	0	0	0
OTU1350	-2.449	5.678	0.0404985	0.226896	NotSig	Bacteria	Firmicutes	Clostridia	Clostridiales	Unassigned	Unassigned	0	0.001	0	0	0	0	0	0	0	0	0	0	0	0	0	0	0.008	0.005	0	0	0	0
OTU1265	2.508	6.263	0.040948	0.228681	NotSig	Bacteria	Proteobacteria	Epsilonproteobacteria	Campylobacterales	Campylobacteraceae	Campylobacter	0.006	0.001	0	0.005	0.004	0	0.018	0	0	0.012	0	0.02	0	0	0	0	0	0	0	0	0.005	0.002
OTU514	-2.52	5.69	0.041391	0.230419	NotSig	Bacteria	Bacteroidetes	Bacteroidia	Bacteroidales	Prevotellaceae	Prevotella	0	0.001	0	0	0	0	0	0	0	0	0	0	0	0	0.002	0	0.01	0	0	0	0	0
OTU172	2.136	6.398	0.041622	0.230969	NotSig	Bacteria	Firmicutes	Bacilli	Lactobacillales	Streptococcaceae	Streptococcus	0.007	0.001	0.022	0.002	0.002	0.014	0	0.008	0.008	0.01	0	0	0	0	0	0	0.003	0.005	0	0	0.005	0
OTU11	-1.508	10.979	0.0419705	0.231801	NotSig	Bacteria	Firmicutes	Erysipelotrichia	Erysipelotrichales	Erysipelotrichaceae	Holdemanella	0.116	0.29	0.024	0.162	0.009	0.049	0.013	0.117	0.064	0.166	0.535	0.02	0.179	1.028	0.017	0.277	0.27	0.213	0.162	0.154	0.379	0.225
OTU364	1.565	13.86	0.0420865	0.231801	NotSig	Bacteria	Bacteroidetes	Bacteroidia	Bacteroidales	Porphyromonadaceae	Unassigned	1.917	0.783	0.646	1.39	1.168	11.598	1.836	0.72	0.351	0.67	0.037	0.758	1.85	1.401	0.627	0.114	0.876	0.683	0.532	0.427	0.281	1.038
OTU868	-2.539	7.816	0.0422348	0.231801	NotSig	Bacteria	Firmicutes	Clostridia	Clostridiales	Unassigned	Unassigned	0.006	0.024	0.002	0	0	0	0	0.005	0	0	0.055	0	0.002	0.056	0.025	0.114	0.013	0.01	0	0	0.022	0.002
OTU599	-2.186	5.642	0.0423024	0.231801	NotSig	Bacteria	Bacteroidetes	Bacteroidia	Bacteroidales	Prevotellaceae	Prevotella	0	0.001	0	0	0	0	0	0	0	0	0	0	0	0	0	0	0.005	0.005	0	0	0	0
OTU529	-2.057	5.897	0.042638	0.232392	NotSig	Bacteria	Bacteroidetes	Bacteroidia	Bacteroidales	Prevotellaceae	Prevotella	0	0.003	0	0	0	0	0	0.003	0	0.002	0	0	0.005	0	0	0	0.005	0.008	0.006	0	0	0.005
OTU144	2.454	6.472	0.0427009	0.232392	NotSig	Bacteria	Unassigned	Unassigned	Unassigned	Unassigned	Unassigned	0.008	0.001	0.005	0	0	0	0.041	0	0.004	0.02	0.005	0.008	0	0	0.007	0	0	0	0	0.002	0	0
OTU807	1.503	9.166	0.0429563	0.232392	NotSig	Bacteria	Unassigned	Unassigned	Unassigned	Unassigned	Unassigned	0.074	0.029	0.081	0.077	0.027	0.288	0.07	0.033	0.041	0.026	0.082	0.014	0.018	0.045	0.005	0.007	0.013	0.005	0.105	0.047	0.007	0.035
OTU856	1.889	10.084	0.0430117	0.232392	NotSig	Bacteria	Firmicutes	Unassigned	Unassigned	Unassigned	Unassigned	0.171	0.043	0.636	0.053	0.422	0.005	0.12	0.17	0.077	0.037	0.01	0.181	0.1	0.005	0.005	0	0.003	0	0.02	0.205	0.037	0.054
OTU1303	-1.44	8.599	0.043075	0.232392	NotSig	Bacteria	Firmicutes	Clostridia	Clostridiales	Lachnospiraceae	Unassigned	0.02	0.051	0.026	0.019	0.007	0.012	0.038	0.015	0.006	0.028	0.032	0.018	0.009	0.151	0.017	0.016	0.111	0.114	0.011	0.017	0.055	0.005
OTU166	-1.937	6.793	0.04377	0.235416	NotSig	Bacteria	Proteobacteria	Gammaproteobacteria	Pasteurellales	Pasteurellaceae	Unassigned	0.003	0.011	0	0.002	0	0	0	0.013	0.006	0.004	0	0.002	0.002	0.054	0.002	0.007	0.01	0.003	0.003	0.002	0.022	0
OTU415	-2.208	9.399	0.044947	0.240401	NotSig	Bacteria	Bacteroidetes	Bacteroidia	Bacteroidales	Prevotellaceae	Prevotella	0.025	0.104	0	0.015	0	0.012	0.036	0.157	0.002	0	0.027	0	0.018	0.581	0.177	0.007	0.13	0.081	0.006	0	0.04	0.005
OTU863	2.079	6.416	0.0449721	0.240401	NotSig	Bacteria	Unassigned	Unassigned	Unassigned	Unassigned	Unassigned	0.007	0.001	0.005	0	0	0.005	0.018	0.005	0.009	0	0.027	0.002	0.002	0	0	0	0	0.005	0	0	0	0.007
OTU1290	2.596	6.358	0.0454893	0.242425	NotSig	Bacteria	Unassigned	Unassigned	Unassigned	Unassigned	Unassigned	0.006	0.001	0.012	0.015	0.002	0	0	0	0.024	0	0	0.008	0	0	0.005	0	0	0	0	0.002	0	0
OTU1328	2.676	5.72	0.0460061	0.242679	NotSig	Bacteria	Unassigned	Unassigned	Unassigned	Unassigned	Unassigned	0.002	0	0.012	0	0.004	0	0	0	0	0	0	0	0	0	0	0	0	0	0	0	0	0
OTU7	-1.855	15.872	0.046017	0.242679	NotSig	Bacteria	Firmicutes	Negativicutes	Selenomonadales	Veillonellaceae	Megasphaera	2.808	8.544	0.701	0.065	0.503	3.403	2.449	14.943	0.004	0.185	5.564	0.266	6.302	4.133	3.349	15.582	5.637	13.563	0.208	0.051	23.887	12.732
OTU989	-2.113	5.632	0.0460576	0.242679	NotSig	Bacteria	Firmicutes	Clostridia	Clostridiales	Unassigned	Unassigned	0	0.001	0	0	0	0	0	0	0	0	0	0	0.002	0	0	0	0	0	0.009	0	0	0
OTU389	1.791	10.43	0.0460924	0.242679	NotSig	Bacteria	Bacteroidetes	Unassigned	Unassigned	Unassigned	Unassigned	0.206	0.064	0.227	0.005	1.067	0.098	0.181	0.046	0.023	0.335	0.072	0.006	0.324	0.079	0.037	0.027	0.003	0	0.011	0.028	0.035	0.094
OTU790	-2.268	5.651	0.0463964	0.243546	NotSig	Bacteria	Firmicutes	Clostridia	Clostridiales	Unassigned	Unassigned	0	0.001	0	0	0	0	0	0	0	0	0	0	0.002	0	0	0	0	0	0	0	0	0.009
OTU1078	1.515	8.823	0.0467717	0.244781	NotSig	Bacteria	Unassigned	Unassigned	Unassigned	Unassigned	Unassigned	0.06	0.023	0.067	0.092	0.036	0.03	0.061	0.018	0.154	0.079	0.01	0.048	0.048	0.005	0.007	0	0.005	0.01	0.102	0.015	0.005	0.035
OTU542	3.625	5.93	0.0469132	0.244789	NotSig	Bacteria	Bacteroidetes	Flavobacteriia	Flavobacteriales	Flavobacteriaceae	Cloacibacterium	0.003	0	0	0	0.029	0	0	0	0	0	0	0	0	0	0	0	0	0	0	0	0	0
OTU890	-2.369	6.25	0.0471796	0.244797	NotSig	Bacteria	Firmicutes	Clostridia	Clostridiales	Unassigned	Unassigned	0.001	0.005	0	0.002	0	0	0	0	0	0	0.007	0	0	0	0	0.005	0.023	0.018	0.003	0.002	0.002	0
OTU458	-1.859	8.671	0.0471948	0.244797	NotSig	Bacteria	Bacteroidetes	Bacteroidia	Bacteroidales	Prevotellaceae	Prevotella	0.016	0.047	0.017	0.015	0.016	0.042	0.005	0.028	0	0.022	0.01	0.002	0.007	0.009	0.297	0.005	0.034	0.036	0.006	0.006	0.07	0
OTU1694	2.692	6.204	0.0475385	0.24585	NotSig	Bacteria	Firmicutes	Clostridia	Clostridiales	Ruminococcaceae	Unassigned	0.005	0	0.019	0.007	0	0.005	0	0	0	0	0	0.022	0	0	0	0.002	0	0	0	0.002	0	0
OTU795	-3.92	6.32	0.0481387	0.24822	NotSig	Bacteria	Actinobacteria	Actinobacteria	Coriobacteriales	Coriobacteriaceae	Unassigned	0	0.005	0	0	0	0	0	0	0	0	0.002	0	0	0	0	0.045	0	0	0	0	0	0
OTU1233	1.75	7.13	0.0483349	0.248319	NotSig	Bacteria	Firmicutes	Clostridia	Clostridiales	Ruminococcaceae	Butyricicoccus	0.015	0.004	0.033	0.017	0.027	0.016	0.005	0.008	0.002	0.002	0.02	0.022	0	0	0	0	0.008	0.01	0.023	0.004	0	0
OTU830	-2.356	8.106	0.0484422	0.248319	NotSig	Bacteria	Firmicutes	Clostridia	Clostridiales	Unassigned	Unassigned	0.009	0.033	0	0.005	0	0	0.056	0	0	0	0.025	0	0.038	0	0.02	0.129	0.005	0.01	0.048	0	0.025	0.052
OTU350	2.648	5.715	0.049002	0.249527	NotSig	Bacteria	Firmicutes	Erysipelotrichia	Erysipelotrichales	Erysipelotrichaceae	Erysipelothrix	0.002	0	0	0.015	0.002	0	0	0	0	0	0	0	0	0	0	0	0	0	0	0	0	0
OTU21	1.78	8.741	0.0490438	0.249527	NotSig	Bacteria	Planctomycetes	Planctomycetia	Planctomycetales	Planctomycetaceae	Unassigned	0.056	0.017	0.038	0.022	0.061	0.162	0.063	0.01	0.054	0.004	0.112	0.038	0.061	0.002	0.015	0	0	0	0	0.041	0.02	0.033
OTU190	-2.419	6.27	0.0491629	0.249527	NotSig	Bacteria	Unassigned	Unassigned	Unassigned	Unassigned	Unassigned	0.001	0.006	0	0.005	0	0	0	0	0	0	0.005	0	0	0.005	0	0.007	0	0	0.006	0	0.015	0.023
OTU1689	2.031	6.376	0.0492488	0.249527	NotSig	Bacteria	Firmicutes	Clostridia	Clostridiales	Ruminococcaceae	Unassigned	0.006	0.001	0.014	0.01	0	0.023	0.007	0	0	0.002	0.002	0.002	0.002	0	0	0.005	0	0	0	0	0.002	0.002
OTU1322	-2.034	5.62	0.0503526	0.251742	NotSig	Bacteria	Firmicutes	Clostridia	Clostridiales	Eubacteriaceae	Eubacterium	0	0.001	0	0	0	0	0	0	0	0	0	0	0.002	0	0	0	0	0	0	0	0	0.007
OTU516	2.53	5.696	0.050362	0.251742	NotSig	Bacteria	Bacteroidetes	Bacteroidia	Bacteroidales	Bacteroidaceae	Bacteroides	0.001	0	0	0.007	0.007	0	0	0	0	0	0	0	0	0	0	0	0	0	0	0	0	0
OTU342	2.534	5.696	0.0504465	0.251742	NotSig	Bacteria	Firmicutes	Negativicutes	Selenomonadales	Veillonellaceae	Schwartzia	0.002	0	0	0	0	0	0.013	0	0	0	0.002	0	0	0	0	0	0	0	0	0	0	0
OTU1582	3.519	5.9	0.0507447	0.251742	NotSig	Bacteria	Proteobacteria	Epsilonproteobacteria	Campylobacterales	Campylobacteraceae	Arcobacter	0.003	0	0	0	0.027	0	0	0	0	0	0	0	0	0	0	0	0	0	0	0	0	0
OTU541	3.519	5.9	0.0507447	0.251742	NotSig	Bacteria	Bacteroidetes	Bacteroidia	Bacteroidales	Porphyromonadaceae	Unassigned	0.003	0	0	0	0.027	0	0	0	0	0	0	0	0	0	0	0	0	0	0	0	0	0
OTU871	-3.285	6.575	0.0508319	0.251742	NotSig	Bacteria	Firmicutes	Clostridia	Clostridiales	Ruminococcaceae	Unassigned	0.001	0.009	0	0	0.007	0	0	0	0	0	0	0	0	0	0	0.005	0.039	0.051	0	0	0	0
OTU1643	-2.206	6.467	0.0508349	0.251742	NotSig	Bacteria	Firmicutes	Clostridia	Clostridiales	Lachnospiraceae	Unassigned	0.002	0.007	0.002	0	0	0	0.002	0	0	0.002	0.007	0.002	0.009	0	0.027	0	0	0	0.031	0.002	0	0.002
OTU574	-2.118	6.349	0.0510456	0.251742	NotSig	Bacteria	Bacteroidetes	Bacteroidia	Bacteroidales	Prevotellaceae	Prevotella	0.001	0.006	0.007	0	0	0	0	0.003	0	0.004	0	0	0.018	0.007	0.017	0.005	0	0	0	0.002	0	0.009
OTU968	2.008	5.788	0.0510821	0.251742	NotSig	Bacteria	Firmicutes	Clostridia	Clostridiales	Unassigned	Unassigned	0.002	0	0.002	0.002	0.004	0.002	0	0	0.002	0	0.005	0	0.002	0	0	0	0	0	0	0	0	0
OTU219	3.476	5.895	0.0511542	0.251742	NotSig	Bacteria	Unassigned	Unassigned	Unassigned	Unassigned	Unassigned	0.003	0	0	0	0	0	0	0	0	0	0	0.028	0	0	0	0	0	0	0	0	0	0
OTU881	1.703	6.319	0.0512702	0.251742	NotSig	Bacteria	Firmicutes	Clostridia	Clostridiales	Unassigned	Unassigned	0.005	0.001	0	0.002	0.002	0.005	0	0.003	0.013	0.02	0.005	0.004	0.002	0	0	0.002	0	0.003	0.003	0.002	0	0.002
OTU426	-1.575	8.997	0.0525205	0.255553	NotSig	Bacteria	Bacteroidetes	Bacteroidia	Bacteroidales	Bacteroidaceae	Bacteroides	0.024	0.067	0.022	0.007	0.092	0.012	0.013	0.053	0.004	0.026	0.007	0.002	0.12	0.016	0.069	0.018	0.07	0.076	0	0.019	0.247	0.04
OTU1538	2.431	5.68	0.0526616	0.255553	NotSig	Bacteria	Proteobacteria	Alphaproteobacteria	Unassigned	Unassigned	Unassigned	0.001	0	0	0.007	0	0	0	0	0	0	0.007	0	0	0	0	0	0	0	0	0	0	0
OTU1646	-2.514	6.006	0.0527323	0.255553	NotSig	Bacteria	Firmicutes	Clostridia	Clostridiales	Lachnospiraceae	Unassigned	0	0.004	0	0	0	0	0.002	0	0	0	0.002	0	0	0.002	0	0	0.026	0.005	0	0	0.002	0
OTU1546	-1.993	5.614	0.0527663	0.255553	NotSig	Bacteria	Firmicutes	Clostridia	Clostridiales	Ruminococcaceae	Unassigned	0	0.001	0	0	0	0	0	0	0	0	0	0	0.007	0	0	0	0	0	0	0	0	0.002
OTU417	1.956	8.589	0.0528092	0.255553	NotSig	Bacteria	Bacteroidetes	Unassigned	Unassigned	Unassigned	Unassigned	0.05	0.016	0.043	0.015	0.034	0.211	0.004	0.028	0.004	0.089	0.007	0.07	0.082	0	0.01	0	0	0	0.031	0.002	0	0.031
OTU730	3.013	6.247	0.0529234	0.255553	NotSig	Bacteria	Actinobacteria	Actinobacteria	Actinomycetales	Corynebacteriaceae	Corynebacterium	0.005	0.001	0.002	0.007	0.045	0	0	0	0	0	0	0	0	0.002	0	0	0	0	0.003	0	0	0
OTU949	2.429	5.68	0.0533342	0.256827	NotSig	Bacteria	Firmicutes	Clostridia	Clostridiales	Ruminococcaceae	Unassigned	0.001	0	0.005	0	0	0	0	0	0	0	0	0.008	0	0	0	0	0	0	0	0	0	0
OTU1644	-2.253	6.449	0.0535332	0.256996	NotSig	Bacteria	Firmicutes	Clostridia	Clostridiales	Lachnospiraceae	Unassigned	0.001	0.007	0	0	0	0	0	0.005	0.002	0	0.002	0.004	0.002	0.005	0.022	0	0	0	0.034	0	0	0.009
OTU1014	1.923	5.766	0.05374	0.256996	NotSig	Bacteria	Firmicutes	Clostridia	Clostridiales	Unassigned	Unassigned	0.002	0	0.002	0.002	0.002	0	0.004	0	0.004	0	0.002	0	0.002	0	0	0	0	0	0	0	0	0
OTU1030	2.414	5.678	0.0538103	0.256996	NotSig	Bacteria	Firmicutes	Unassigned	Unassigned	Unassigned	Unassigned	0.001	0	0	0	0	0	0.004	0.01	0	0	0	0	0	0	0	0	0	0	0	0	0	0
OTU734	3.394	5.874	0.0543201	0.258698	NotSig	Bacteria	Verrucomicrobia	Verrucomicrobiae	Verrucomicrobiales	Verrucomicrobiaceae	Akkermansia	0.003	0	0.031	0	0	0	0	0	0	0	0	0	0	0	0	0	0	0	0	0	0	0
OTU651	-2.069	6.7	0.0544628	0.258698	NotSig	Bacteria	Bacteroidetes	Bacteroidia	Bacteroidales	Porphyromonadaceae	Unassigned	0.002	0.01	0.005	0	0	0	0	0.008	0	0	0.002	0.008	0	0	0.01	0.002	0	0.008	0.06	0.004	0.015	0.002
OTU1103	1.381	8.956	0.0550849	0.259598	NotSig	Bacteria	Firmicutes	Clostridia	Clostridiales	Ruminococcaceae	Oscillibacter	0.065	0.026	0.077	0.024	0.061	0.049	0.208	0.018	0.118	0.016	0.012	0.062	0.041	0.018	0.007	0.014	0.052	0.025	0.014	0.009	0.002	0.075
OTU1704	3.404	5.87	0.0550976	0.259598	NotSig	Bacteria	Firmicutes	Clostridia	Clostridiales	Unassigned	Unassigned	0.002	0	0	0	0.025	0	0	0	0	0	0	0	0	0	0	0	0	0	0	0	0	0
OTU317	3.404	5.87	0.0550976	0.259598	NotSig	Bacteria	Proteobacteria	Betaproteobacteria	Burkholderiales	Comamonadaceae	Unassigned	0.002	0	0	0	0.025	0	0	0	0	0	0	0	0	0	0	0	0	0	0	0	0	0
OTU1579	-3.105	5.795	0.0553387	0.260032	NotSig	Bacteria	Firmicutes	Clostridia	Clostridiales	Ruminococcaceae	Ruminococcus	0	0.002	0	0	0	0	0	0	0	0	0	0	0	0	0	0	0	0	0	0	0.02	0
OTU466	-2.055	5.633	0.055496	0.260072	NotSig	Bacteria	Bacteroidetes	Bacteroidia	Bacteroidales	Prevotellaceae	Prevotella	0	0.001	0	0	0	0	0	0	0	0	0	0	0	0	0.007	0	0	0	0	0	0	0
OTU675	2.503	6.203	0.056139	0.260619	NotSig	Bacteria	Bacteroidetes	Bacteroidia	Bacteroidales	Porphyromonadaceae	Unassigned	0.005	0.001	0	0.002	0.002	0	0	0.003	0.026	0	0.012	0	0.005	0	0	0	0	0	0.003	0	0	0
OTU1018	1.995	9.596	0.0563697	0.260619	NotSig	Bacteria	Firmicutes	Clostridia	Clostridiales	Lachnospiraceae	Unassigned	0.124	0.033	0.151	0	0.146	0	0.283	0.246	0.137	0.069	0.193	0.018	0.032	0.041	0.007	0	0	0	0.216	0.006	0	0.031
OTU1116	-3.138	6.561	0.0563962	0.260619	NotSig	Bacteria	Synergistetes	Synergistia	Synergistales	Synergistaceae	Pyramidobacter	0.001	0.006	0	0	0	0	0.002	0.005	0	0	0	0.002	0	0	0	0.057	0	0	0	0	0.005	0
OTU705	2.401	6.616	0.0569849	0.260619	NotSig	Bacteria	Actinobacteria	Actinobacteria	Actinomycetales	Corynebacteriaceae	Corynebacterium	0.01	0.001	0	0.01	0.025	0	0.05	0	0	0.008	0.005	0	0	0	0	0	0	0	0	0.009	0.002	0.002
OTU304	-2.03	5.63	0.0571795	0.260619	NotSig	Bacteria	Firmicutes	Negativicutes	Selenomonadales	Acidaminococcaceae	Phascolarctobacterium	0	0.001	0	0	0	0	0	0	0	0	0	0	0	0	0	0.005	0	0.003	0	0	0	0
OTU1149	2.812	7.929	0.0574639	0.260619	NotSig	Bacteria	Firmicutes	Clostridia	Clostridiales	Ruminococcaceae	Ruminococcus	0.034	0.005	0.153	0	0.101	0.082	0.002	0	0	0	0	0	0	0	0	0	0.016	0.025	0.003	0	0.005	0
OTU1198	2.121	5.641	0.0578026	0.260619	NotSig	Bacteria	Candidatus_Saccharibacteria	Unassigned	Unassigned	Unassigned	Saccharibacteria_genera_incertae_sedis	0.001	0	0	0	0.009	0	0	0	0	0	0	0	0	0	0	0	0	0	0	0	0	0
OTU1240	2.121	5.641	0.0578026	0.260619	NotSig	Bacteria	Candidatus_Saccharibacteria	Unassigned	Unassigned	Unassigned	Saccharibacteria_genera_incertae_sedis	0.001	0	0	0	0.009	0	0	0	0	0	0	0	0	0	0	0	0	0	0	0	0	0
OTU1721	2.121	5.641	0.0578026	0.260619	NotSig	Bacteria	Firmicutes	Clostridia	Clostridiales	Clostridiales_Incertae_Sedis_XI	Tissierella	0.001	0	0	0	0.009	0	0	0	0	0	0	0	0	0	0	0	0	0	0	0	0	0
OTU279	2.121	5.641	0.0578026	0.260619	NotSig	Bacteria	Proteobacteria	Betaproteobacteria	Burkholderiales	Comamonadaceae	Unassigned	0.001	0	0	0	0.009	0	0	0	0	0	0	0	0	0	0	0	0	0	0	0	0	0
OTU282	2.121	5.641	0.0578026	0.260619	NotSig	Bacteria	Firmicutes	Negativicutes	Selenomonadales	Veillonellaceae	Veillonella	0.001	0	0	0	0.009	0	0	0	0	0	0	0	0	0	0	0	0	0	0	0	0	0
OTU321	2.121	5.641	0.0578026	0.260619	NotSig	Bacteria	Proteobacteria	Betaproteobacteria	Burkholderiales	Comamonadaceae	Brachymonas	0.001	0	0	0	0.009	0	0	0	0	0	0	0	0	0	0	0	0	0	0	0	0	0
OTU501	2.121	5.641	0.0578026	0.260619	NotSig	Bacteria	Bacteroidetes	Bacteroidia	Bacteroidales	Porphyromonadaceae	Unassigned	0.001	0	0	0	0.009	0	0	0	0	0	0	0	0	0	0	0	0	0	0	0	0	0
OTU618	2.121	5.641	0.0578026	0.260619	NotSig	Bacteria	Bacteroidetes	Flavobacteriia	Flavobacteriales	Flavobacteriaceae	Chryseobacterium	0.001	0	0	0	0.009	0	0	0	0	0	0	0	0	0	0	0	0	0	0	0	0	0
OTU1273	1.964	6.608	0.058179	0.260619	NotSig	Bacteria	Firmicutes	Clostridia	Clostridiales	Unassigned	Unassigned	0.008	0.002	0.002	0.005	0.011	0	0	0.003	0.034	0.02	0.002	0.002	0	0	0.002	0	0	0	0.011	0.002	0	0.005
OTU1281	1.836	6.906	0.0582893	0.260619	NotSig	Bacteria	Firmicutes	Clostridia	Clostridiales	Unassigned	Unassigned	0.012	0.003	0	0.002	0	0.019	0.065	0.013	0.004	0.006	0.007	0.008	0.005	0	0	0	0.005	0	0	0.013	0.002	0.005
OTU934	3.241	5.842	0.0587653	0.260619	NotSig	Bacteria	Firmicutes	Clostridia	Clostridiales	Ruminococcaceae	Unassigned	0.003	0	0	0	0	0	0.027	0	0	0	0	0	0	0	0	0	0	0	0	0	0	0
OTU540	2.33	5.667	0.058779	0.260619	NotSig	Bacteria	Bacteroidetes	Bacteroidia	Bacteroidales	Porphyromonadaceae	Unassigned	0.001	0	0	0.005	0.007	0	0	0	0	0	0	0	0	0	0	0	0	0	0	0	0	0
OTU775	2.101	5.638	0.0590868	0.260619	NotSig	Bacteria	Actinobacteria	Actinobacteria	Actinomycetales	Dermabacteraceae	Brachybacterium	0.001	0	0	0	0.004	0	0	0.003	0.002	0	0	0	0	0	0	0	0	0	0	0	0	0
OTU301	-2	5.626	0.0591943	0.260619	NotSig	Bacteria	Unassigned	Unassigned	Unassigned	Unassigned	Unassigned	0	0.001	0	0	0	0	0	0	0	0	0	0	0	0	0	0.005	0	0	0	0	0	0.002
OTU638	-2.652	5.876	0.0593704	0.260619	NotSig	Bacteria	Bacteroidetes	Bacteroidia	Bacteroidales	Porphyromonadaceae	Unassigned	0	0.003	0	0	0	0	0.002	0	0	0	0	0	0	0.005	0	0	0.003	0	0.023	0	0	0
OTU1701	2.289	5.661	0.0599457	0.260619	NotSig	Bacteria	Actinobacteria	Actinobacteria	Coriobacteriales	Coriobacteriaceae	Unassigned	0.001	0	0	0	0.004	0	0	0	0	0	0.007	0	0	0	0	0	0	0	0	0	0	0
OTU263	2.087	5.636	0.0599788	0.260619	NotSig	Bacteria	Firmicutes	Bacilli	Lactobacillales	Unassigned	Unassigned	0.001	0	0	0.002	0.007	0	0	0	0	0	0	0	0	0	0	0	0	0	0	0	0	0
OTU1523	2.087	5.636	0.0599835	0.260619	NotSig	Bacteria	Unassigned	Unassigned	Unassigned	Unassigned	Unassigned	0.001	0	0.002	0	0.007	0	0	0	0	0	0	0	0	0	0	0	0	0	0	0	0	0
OTU432	-2.006	7.981	0.0600346	0.260619	NotSig	Bacteria	Bacteroidetes	Bacteroidia	Bacteroidales	Porphyromonadaceae	Unassigned	0.009	0.031	0	0.007	0.004	0	0.036	0.005	0	0.004	0.035	0.002	0.002	0.041	0.044	0.014	0	0	0.017	0.013	0.174	0
OTU1534	3.279	5.84	0.0600854	0.260619	NotSig	Bacteria	Firmicutes	Clostridia	Clostridiales	Clostridiaceae_1	Proteiniclasticum	0.002	0	0	0	0.022	0	0	0	0	0	0	0	0	0	0	0	0	0	0	0	0	0
OTU1714	3.279	5.84	0.0600854	0.260619	NotSig	Bacteria	Firmicutes	Clostridia	Clostridiales	Unassigned	Unassigned	0.002	0	0	0	0.022	0	0	0	0	0	0	0	0	0	0	0	0	0	0	0	0	0
OTU492	3.279	5.84	0.0600854	0.260619	NotSig	Bacteria	Bacteroidetes	Flavobacteriia	Flavobacteriales	Flavobacteriaceae	Flavobacterium	0.002	0	0	0	0.022	0	0	0	0	0	0	0	0	0	0	0	0	0	0	0	0	0
OTU502	3.279	5.84	0.0600854	0.260619	NotSig	Bacteria	Bacteroidetes	Flavobacteriia	Flavobacteriales	Flavobacteriaceae	Chryseobacterium	0.002	0	0	0	0.022	0	0	0	0	0	0	0	0	0	0	0	0	0	0	0	0	0
OTU68	3.279	5.84	0.0600854	0.260619	NotSig	Bacteria	Spirochaetes	Spirochaetia	Spirochaetales	Spirochaetaceae	Treponema	0.002	0	0	0	0.022	0	0	0	0	0	0	0	0	0	0	0	0	0	0	0	0	0
OTU430	2.848	6.902	0.0615426	0.265201	NotSig	Bacteria	Bacteroidetes	Bacteroidia	Bacteroidales	Unassigned	Unassigned	0.014	0.002	0	0.073	0	0	0	0	0	0.002	0.007	0.062	0.016	0	0	0	0	0	0	0	0	0.002
OTU955	2.319	5.665	0.0616178	0.265201	NotSig	Bacteria	Firmicutes	Clostridia	Clostridiales	Unassigned	Unassigned	0.001	0	0	0	0	0	0	0	0.008	0.002	0	0	0	0	0	0	0	0	0	0	0	0
OTU405	2.061	10.417	0.0617072	0.265201	NotSig	Bacteria	Bacteroidetes	Unassigned	Unassigned	Unassigned	Unassigned	0.2	0.055	0.139	0.07	1.292	0.089	0.047	0.003	0.086	0	0.062	0.213	0.335	0	0.044	0.011	0	0	0	0.013	0.037	0.113
OTU448	2.399	6.908	0.0619374	0.265201	NotSig	Bacteria	Bacteroidetes	Bacteroidia	Bacteroidales	Prevotellaceae	Prevotella	0.013	0.002	0.012	0.056	0.061	0	0.002	0.003	0	0	0	0	0	0.005	0	0	0	0	0.003	0.009	0.005	0
OTU605	-2.81	5.739	0.0619853	0.265201	NotSig	Bacteria	Bacteroidetes	Bacteroidia	Bacteroidales	Prevotellaceae	Prevotella	0	0.002	0	0	0	0	0	0	0	0	0	0	0	0	0	0	0	0	0.02	0	0	0
OTU217	2.056	5.632	0.0622128	0.265201	NotSig	Bacteria	Unassigned	Unassigned	Unassigned	Unassigned	Unassigned	0.001	0	0	0.002	0	0.002	0	0	0	0	0	0.004	0	0	0	0	0	0	0	0	0	0
OTU1668	2.053	5.631	0.0622196	0.265201	NotSig	Bacteria	Firmicutes	Clostridia	Clostridiales	Unassigned	Unassigned	0.001	0	0	0.005	0.004	0	0	0	0	0	0	0	0	0	0	0	0	0	0	0	0	0
OTU60	1.431	7.281	0.0626368	0.265201	NotSig	Bacteria	Firmicutes	Clostridia	Clostridiales	Unassigned	Unassigned	0.018	0.006	0.024	0.039	0.007	0	0.041	0.01	0.006	0.002	0.012	0.036	0.005	0.005	0	0.002	0.016	0.013	0.014	0.002	0.002	0.002
OTU604	-1.939	5.616	0.0627576	0.265201	NotSig	Bacteria	Bacteroidetes	Bacteroidia	Bacteroidales	Prevotellaceae	Prevotella	0	0.001	0	0	0	0	0	0	0	0	0	0	0	0	0	0.002	0	0	0.006	0	0	0
OTU1336	-2.607	5.865	0.0628079	0.265201	NotSig	Bacteria	Firmicutes	Clostridia	Clostridiales	Unassigned	Unassigned	0	0.002	0	0	0	0	0.002	0	0	0	0	0	0	0.005	0	0	0	0	0.003	0	0.017	0
OTU313	2.044	5.63	0.0628211	0.265201	NotSig	Bacteria	Unassigned	Unassigned	Unassigned	Unassigned	Unassigned	0.001	0	0	0	0	0	0	0	0.004	0	0	0.004	0	0	0	0	0	0	0	0	0	0
OTU1548	2.048	5.631	0.0629624	0.265201	NotSig	Bacteria	Firmicutes	Clostridia	Clostridiales	Ruminococcaceae	Clostridium_IV	0.001	0	0.002	0	0.002	0.002	0.002	0	0	0	0	0	0	0	0	0	0	0	0	0	0	0
OTU225	-1.813	9.449	0.0633707	0.266279	NotSig	Bacteria	Firmicutes	Negativicutes	Selenomonadales	Veillonellaceae	Megasphaera	0.031	0.088	0.01	0	0.02	0.044	0.013	0.091	0	0.002	0.129	0.002	0.038	0.023	0.044	0.202	0.057	0.122	0	0.002	0.339	0.056
OTU1508	3.762	6.324	0.0639429	0.268039	NotSig	Bacteria	Firmicutes	Clostridia	Clostridiales	Clostridiaceae_1	Clostridium_sensu_stricto	0.005	0	0	0	0	0.054	0	0	0	0	0	0	0	0	0	0	0	0	0	0.002	0	0
OTU992	2.219	5.65	0.064646	0.270338	NotSig	Bacteria	Unassigned	Unassigned	Unassigned	Unassigned	Unassigned	0.001	0	0	0.002	0	0	0	0	0	0	0	0.008	0	0	0	0	0	0	0	0	0	0
OTU399	-1.902	5.61	0.0649481	0.270953	NotSig	Bacteria	Bacteroidetes	Bacteroidia	Bacteroidales	Prevotellaceae	Unassigned	0	0.001	0	0	0	0	0	0	0	0	0	0	0	0	0	0	0.005	0	0	0	0.002	0
OTU1740	2.212	6.921	0.0652915	0.271737	NotSig	Archaea	Euryarchaeota	Methanobacteria	Methanobacteriales	Methanobacteriaceae	Methanobrevibacter	0.012	0.002	0.029	0.002	0.043	0.03	0	0	0.008	0.006	0	0	0.002	0	0	0.002	0	0	0.003	0.015	0	0
OTU1682	-2.127	7.769	0.0655106	0.271751	NotSig	Bacteria	Actinobacteria	Actinobacteria	Coriobacteriales	Coriobacteriaceae	Unassigned	0.007	0.023	0	0	0.009	0	0	0.01	0	0.002	0.052	0	0	0.007	0.005	0.102	0.026	0.046	0.011	0	0.027	0.005
OTU602	-1.892	5.609	0.0656058	0.271751	NotSig	Bacteria	Bacteroidetes	Bacteroidia	Bacteroidales	Prevotellaceae	Prevotella	0	0.001	0	0	0	0	0	0	0	0	0	0	0	0	0	0	0.008	0	0	0	0	0
OTU1323	3.143	5.808	0.065861	0.272163	NotSig	Bacteria	Firmicutes	Clostridia	Clostridiales	Clostridiales_Incertae_Sedis_XI	Unassigned	0.002	0	0	0	0.02	0	0	0	0	0	0	0	0	0	0	0	0	0	0	0	0	0
OTU1616	1.993	5.623	0.0662729	0.273219	NotSig	Bacteria	Actinobacteria	Actinobacteria	Coriobacteriales	Coriobacteriaceae	Unassigned	0.001	0	0	0	0	0	0	0.003	0	0	0.005	0.002	0	0	0	0	0	0	0	0	0	0
OTU1316	-2.661	5.712	0.0664733	0.273401	NotSig	Bacteria	Unassigned	Unassigned	Unassigned	Unassigned	Unassigned	0	0.001	0	0	0	0	0	0	0	0	0	0	0	0	0	0	0	0	0	0.013	0	0
OTU1007	1.982	5.621	0.0670527	0.273534	NotSig	Bacteria	Unassigned	Unassigned	Unassigned	Unassigned	Unassigned	0.001	0	0	0.007	0	0	0	0	0	0	0	0.002	0	0	0	0	0	0	0	0	0	0
OTU253	1.982	5.621	0.0670578	0.273534	NotSig	Bacteria	Firmicutes	Clostridia	Clostridiales	Syntrophomonadaceae	Syntrophomonas	0.001	0	0.002	0.005	0	0	0	0	0	0	0	0.002	0	0	0	0	0	0	0	0	0	0
OTU974	1.982	5.621	0.067068	0.273534	NotSig	Bacteria	Firmicutes	Clostridia	Clostridiales	Unassigned	Unassigned	0.001	0	0.007	0	0	0	0	0	0	0	0	0.002	0	0	0	0	0	0	0	0	0	0
OTU1613	-2.958	6.503	0.0671678	0.273534	NotSig	Bacteria	Firmicutes	Clostridia	Clostridiales	Lachnospiraceae	Unassigned	0.001	0.008	0	0	0	0	0	0.003	0	0	0.007	0	0	0.002	0	0.005	0	0	0	0	0.07	0
OTU761	1.977	5.62	0.0673736	0.273534	NotSig	Bacteria	Unassigned	Unassigned	Unassigned	Unassigned	Unassigned	0.001	0	0	0.002	0	0	0	0	0	0	0	0.006	0	0	0	0	0	0	0	0	0	0
OTU1067	1.299	9.312	0.0675738	0.273534	NotSig	Bacteria	Firmicutes	Clostridia	Clostridiales	Ruminococcaceae	Unassigned	0.091	0.036	0.242	0.194	0.171	0.009	0.09	0.033	0.032	0.079	0.032	0.028	0.091	0.005	0.015	0.005	0.026	0.043	0.082	0.034	0.01	0.052
OTU1140	1.974	5.62	0.067601	0.273534	NotSig	Bacteria	Firmicutes	Clostridia	Clostridiales	Unassigned	Unassigned	0.001	0	0	0	0	0	0	0	0	0	0.01	0	0	0	0	0	0	0	0	0	0	0
OTU1356	-1.778	6.943	0.0682309	0.274311	NotSig	Bacteria	Firmicutes	Clostridia	Clostridiales	Unassigned	Unassigned	0.004	0.013	0	0.005	0	0	0.005	0.003	0	0	0.025	0.002	0.007	0.027	0.002	0	0.005	0.008	0.051	0	0.027	0.005
OTU1707	-2.483	6.181	0.068275	0.274311	NotSig	Bacteria	Firmicutes	Negativicutes	Selenomonadales	Veillonellaceae	Megasphaera	0.001	0.005	0	0	0	0	0	0.005	0	0	0.002	0	0	0.002	0	0.005	0	0.028	0	0	0.012	0
OTU714	1.635	12.393	0.0683206	0.274311	NotSig	Bacteria	Firmicutes	Clostridia	Clostridiales	Unassigned	Unassigned	0.86	0.26	1.985	0.898	1.193	0.511	0.975	0.127	0.252	0.104	1.675	0.875	0.906	0	0.13	0.109	0.005	0.008	0	0.534	0.319	0.589
OTU607	-1.849	5.603	0.0685516	0.274311	NotSig	Bacteria	Bacteroidetes	Bacteroidia	Bacteroidales	Prevotellaceae	Prevotella	0	0.001	0	0	0	0	0	0	0	0	0	0	0	0	0	0	0	0	0.009	0	0	0
OTU455	1.544	7.737	0.068898	0.274311	NotSig	Bacteria	Bacteroidetes	Bacteroidia	Bacteroidales	Prevotellaceae	Prevotella	0.026	0.009	0.002	0.15	0.027	0.028	0.018	0.013	0.019	0.004	0.002	0	0.011	0.016	0.012	0.002	0.008	0.018	0.009	0	0.002	0.007
OTU1052	-1.845	5.603	0.0689362	0.274311	NotSig	Bacteria	Firmicutes	Unassigned	Unassigned	Unassigned	Unassigned	0	0.001	0	0	0	0	0	0	0	0	0	0	0	0	0	0	0	0.003	0	0	0.002	0.002
OTU686	-1.705	5.948	0.0689551	0.274311	NotSig	Bacteria	Bacteroidetes	Bacteroidia	Bacteroidales	Porphyromonadaceae	Unassigned	0.001	0.003	0	0	0.002	0.002	0.002	0	0	0	0	0	0.005	0.002	0	0	0	0.003	0.009	0.002	0	0.009
OTU836	-2.752	6.244	0.0695123	0.274311	NotSig	Bacteria	Firmicutes	Clostridia	Clostridiales	Ruminococcaceae	Unassigned	0.001	0.006	0.002	0.002	0	0	0.002	0	0	0	0	0	0.016	0	0	0	0	0	0	0	0	0.047
OTU136	1.861	7.849	0.0698499	0.274311	NotSig	Bacteria	Unassigned	Unassigned	Unassigned	Unassigned	Unassigned	0.029	0.008	0.002	0.056	0.002	0.047	0	0	0.008	0.002	0.01	0.159	0.007	0.002	0.002	0.002	0	0	0.006	0.028	0.005	0.023
OTU1653	-1.828	5.601	0.0701704	0.274311	NotSig	Bacteria	Firmicutes	Clostridia	Clostridiales	Lachnospiraceae	Unassigned	0	0.001	0	0	0	0	0	0	0	0	0	0	0	0.002	0	0	0	0	0	0.004	0	0
OTU1423	1.92	6.195	0.0701976	0.274311	NotSig	Bacteria	Firmicutes	Clostridia	Clostridiales	Ruminococcaceae	Unassigned	0.004	0.001	0.002	0.002	0.002	0.019	0.002	0.005	0.002	0.002	0	0.006	0	0	0	0	0	0	0	0.009	0	0
OTU345	-1.821	5.6	0.0706316	0.274311	NotSig	Bacteria	Unassigned	Unassigned	Unassigned	Unassigned	Unassigned	0	0.001	0	0	0	0	0	0	0	0	0	0	0	0	0	0	0	0.003	0.003	0	0	0.002
OTU980	1.933	5.614	0.070679	0.274311	NotSig	Bacteria	Firmicutes	Clostridia	Clostridiales	Unassigned	Unassigned	0.001	0	0.002	0.002	0	0	0.002	0	0	0	0.002	0	0	0	0	0	0	0	0	0	0	0
OTU1176	-1.822	5.6	0.0707001	0.274311	NotSig	Bacteria	Firmicutes	Clostridia	Clostridiales	Ruminococcaceae	Oscillibacter	0	0.001	0	0	0	0	0	0	0	0	0	0	0.002	0	0	0	0	0.003	0	0	0.002	0
OTU661	-1.819	5.599	0.0707278	0.274311	NotSig	Bacteria	Bacteroidetes	Bacteroidia	Bacteroidales	Unassigned	Unassigned	0	0.001	0	0	0	0	0	0	0	0	0	0	0	0	0	0	0	0	0.006	0	0	0.002
OTU1081	1.931	5.614	0.0708238	0.274311	NotSig	Bacteria	Firmicutes	Clostridia	Clostridiales	Unassigned	Unassigned	0.001	0	0	0.002	0	0	0.002	0	0	0	0	0.004	0	0	0	0	0	0	0	0	0	0
OTU1710	2.992	5.777	0.07093	0.274311	NotSig	Bacteria	Firmicutes	Clostridia	Clostridiales	Clostridiales_Incertae_Sedis_XI	Unassigned	0.002	0	0	0	0.018	0	0	0	0	0	0	0	0	0	0	0	0	0	0	0	0	0
OTU278	2.992	5.777	0.07093	0.274311	NotSig	Bacteria	Proteobacteria	Gammaproteobacteria	Xanthomonadales	Xanthomonadaceae	Stenotrophomonas	0.002	0	0	0	0.018	0	0	0	0	0	0	0	0	0	0	0	0	0	0	0	0	0
OTU519	2.992	5.777	0.07093	0.274311	NotSig	Bacteria	Bacteroidetes	Bacteroidia	Bacteroidales	Porphyromonadaceae	Unassigned	0.002	0	0	0	0.018	0	0	0	0	0	0	0	0	0	0	0	0	0	0	0	0	0
OTU49	1.333	13.008	0.0709316	0.274311	NotSig	Bacteria	Bacteroidetes	Bacteroidia	Bacteroidales	Porphyromonadaceae	Unassigned	1.286	0.509	0.866	6.294	0.281	0.473	0.629	0.429	0.554	1.352	0.283	1.704	1.746	0.142	0.147	0.018	0.816	0.67	0.478	0.175	0.047	0.85
OTU524	1.955	5.77	0.0714368	0.275473	NotSig	Bacteria	Bacteroidetes	Bacteroidia	Bacteroidales	Unassigned	Unassigned	0.002	0	0.002	0	0.002	0	0.004	0	0.006	0	0	0.002	0.002	0	0	0	0	0	0	0	0	0
OTU586	-1.812	5.6	0.0717723	0.275473	NotSig	Bacteria	Bacteroidetes	Bacteroidia	Bacteroidales	Prevotellaceae	Prevotella	0	0.001	0	0	0	0	0	0	0	0	0	0	0.005	0	0.002	0	0	0	0	0	0	0
OTU472	1.635	6.887	0.0718215	0.275473	NotSig	Bacteria	Bacteroidetes	Bacteroidia	Bacteroidales	Porphyromonadaceae	Unassigned	0.012	0.004	0.01	0.041	0.016	0	0.007	0.003	0.011	0.018	0	0.014	0.018	0.002	0	0	0	0	0.003	0.004	0	0.009
OTU1158	2.925	5.767	0.0718624	0.275473	NotSig	Bacteria	Firmicutes	Clostridia	Clostridiales	Unassigned	Unassigned	0.002	0	0	0.022	0	0	0	0	0	0	0	0	0	0	0	0	0	0	0	0	0	0
OTU208	2.855	5.758	0.0724527	0.276745	NotSig	Bacteria	Unassigned	Unassigned	Unassigned	Unassigned	Unassigned	0.002	0	0	0	0	0	0.02	0	0	0	0	0	0	0	0	0	0	0	0	0	0	0
OTU515	-3.476	6.126	0.0725111	0.276745	NotSig	Bacteria	Bacteroidetes	Bacteroidia	Bacteroidales	Prevotellaceae	Prevotella	0	0.006	0	0	0	0	0	0	0	0.002	0	0	0	0	0	0	0	0	0.057	0	0	0
OTU3	-1.707	12.47	0.0733207	0.278802	NotSig	Bacteria	Firmicutes	Negativicutes	Selenomonadales	Veillonellaceae	Unassigned	0.295	0.757	0.263	0.007	0.128	0.07	0.599	1.659	0.002	0.016	0.191	0.014	0.057	2.368	3.037	0.386	0.031	0.041	0.176	0.088	1.251	0.136
OTU1285	1.361	6.899	0.073369	0.278802	NotSig	Bacteria	Firmicutes	Clostridia	Clostridiales	Ruminococcaceae	Unassigned	0.012	0.004	0.012	0.01	0.022	0	0.014	0.013	0.008	0.016	0.015	0.006	0.002	0.005	0	0	0	0	0.003	0.013	0.007	0.009
OTU1556	-2.443	5.678	0.073622	0.279157	NotSig	Bacteria	Firmicutes	Clostridia	Clostridiales	Lachnospiraceae	Unassigned	0	0.001	0	0	0	0	0	0	0	0	0	0	0	0	0	0	0	0	0	0.011	0	0
OTU1187	-1.774	5.594	0.0742112	0.280782	NotSig	Bacteria	Firmicutes	Clostridia	Clostridiales	Unassigned	Unassigned	0	0.001	0	0	0	0	0	0	0	0	0	0	0.002	0	0	0	0	0	0	0.002	0	0.002
OTU774	-1.758	5.592	0.0753642	0.283117	NotSig	Bacteria	Actinobacteria	Actinobacteria	Actinomycetales	Streptomycetaceae	Streptomyces	0	0.001	0	0	0	0	0	0	0	0	0	0	0.002	0.002	0	0	0	0	0.003	0	0	0
OTU587	-1.757	5.592	0.0755883	0.283117	NotSig	Bacteria	Bacteroidetes	Bacteroidia	Bacteroidales	Prevotellaceae	Prevotella	0	0.001	0	0	0	0	0	0	0	0	0	0	0.005	0	0	0	0.003	0	0	0	0	0
OTU450	2.297	6.016	0.0758546	0.283117	NotSig	Bacteria	Bacteroidetes	Bacteroidia	Bacteroidales	Prevotellaceae	Prevotella	0.004	0	0	0.017	0.011	0	0	0	0	0.002	0	0.006	0	0	0	0	0	0	0	0.002	0	0.002
OTU648	3.111	6.061	0.075901	0.283117	NotSig	Bacteria	Bacteroidetes	Bacteroidia	Bacteroidales	Unassigned	Unassigned	0.004	0	0	0.005	0	0	0	0	0	0	0	0.036	0	0	0	0	0	0	0	0	0	0.002
OTU1683	1.52	7.865	0.0759088	0.283117	NotSig	Bacteria	Firmicutes	Clostridia	Clostridiales	Ruminococcaceae	Unassigned	0.027	0.01	0.055	0.002	0.016	0.094	0.025	0.008	0.008	0.032	0.02	0.012	0.002	0.002	0	0	0.034	0.041	0.011	0.004	0.002	0.002
OTU264	2.823	5.744	0.0763394	0.283117	NotSig	Bacteria	Proteobacteria	Gammaproteobacteria	Aeromonadales	Aeromonadaceae	Aeromonas	0.002	0	0	0	0.016	0	0	0	0	0	0	0	0	0	0	0	0	0	0	0	0	0
OTU280	2.823	5.744	0.0763394	0.283117	NotSig	Bacteria	Proteobacteria	Betaproteobacteria	Burkholderiales	Comamonadaceae	Unassigned	0.002	0	0	0	0.016	0	0	0	0	0	0	0	0	0	0	0	0	0	0	0	0	0
OTU509	2.823	5.744	0.0763394	0.283117	NotSig	Bacteria	Bacteroidetes	Bacteroidia	Bacteroidales	Porphyromonadaceae	Unassigned	0.002	0	0	0	0.016	0	0	0	0	0	0	0	0	0	0	0	0	0	0	0	0	0
OTU1032	-1.743	5.59	0.0765546	0.283117	NotSig	Bacteria	Firmicutes	Clostridia	Clostridiales	Unassigned	Unassigned	0	0.001	0	0	0	0	0	0	0	0	0	0	0.005	0	0	0	0	0.003	0	0	0	0
OTU987	2.779	5.739	0.0765755	0.283117	NotSig	Bacteria	Firmicutes	Clostridia	Clostridiales	Ruminococcaceae	Clostridium_IV	0.002	0	0.019	0	0	0	0	0	0	0	0	0	0	0	0	0	0	0	0	0	0	0
OTU1562	2.764	5.737	0.0769926	0.283117	NotSig	Bacteria	Firmicutes	Clostridia	Clostridiales	Lachnospiraceae	Unassigned	0.002	0	0	0	0	0	0	0	0	0	0.02	0	0	0	0	0	0	0	0	0	0	0
OTU1000	-1.735	5.589	0.0770958	0.283117	NotSig	Bacteria	Firmicutes	Clostridia	Clostridiales	Unassigned	Unassigned	0	0.001	0	0	0	0	0	0	0	0	0	0	0.002	0	0	0	0	0	0	0	0	0.005
OTU299	-1.735	5.589	0.0770958	0.283117	NotSig	Bacteria	Unassigned	Unassigned	Unassigned	Unassigned	Unassigned	0	0.001	0	0	0	0	0	0	0	0	0	0	0.002	0	0	0	0	0	0	0	0	0.005
OTU496	-1.735	5.589	0.0770958	0.283117	NotSig	Bacteria	Bacteroidetes	Bacteroidia	Bacteroidales	Bacteroidaceae	Bacteroides	0	0.001	0	0	0	0	0	0	0	0	0	0	0.002	0	0	0	0	0	0	0	0	0.005
OTU1606	1.942	5.625	0.078015	0.285293	NotSig	Bacteria	Firmicutes	Clostridia	Clostridiales	Ruminococcaceae	Clostridium_IV	0.001	0	0	0	0	0.007	0	0	0	0	0	0	0	0	0	0	0	0	0	0	0	0
OTU669	1.942	5.625	0.078015	0.285293	NotSig	Bacteria	Bacteroidetes	Bacteroidia	Bacteroidales	Porphyromonadaceae	Odoribacter	0.001	0	0	0	0	0.007	0	0	0	0	0	0	0	0	0	0	0	0	0	0	0	0
OTU1392	-3.146	6.687	0.0782508	0.285332	NotSig	Bacteria	Firmicutes	Clostridia	Clostridiales	Lachnospiraceae	Unassigned	0.001	0.009	0	0	0.007	0	0	0	0.002	0	0	0	0	0	0	0	0	0	0	0.09	0	0.002
OTU1174	1.835	5.602	0.0783521	0.285332	NotSig	Bacteria	Firmicutes	Clostridia	Clostridiales	Ruminococcaceae	Unassigned	0.001	0	0	0	0	0	0.005	0	0	0	0	0.002	0	0	0	0	0	0	0	0	0	0
OTU1097	1.276	9.157	0.0791595	0.287673	NotSig	Bacteria	Unassigned	Unassigned	Unassigned	Unassigned	Unassigned	0.079	0.03	0.043	0.136	0.137	0.033	0.018	0.043	0.056	0.242	0.072	0.012	0.048	0.014	0	0.009	0.021	0.038	0.011	0.083	0.047	0.028
OTU1478	1.499	6.806	0.0796379	0.288811	NotSig	Bacteria	Firmicutes	Clostridia	Clostridiales	Lachnospiraceae	Unassigned	0.011	0.004	0.005	0.041	0.004	0	0.002	0	0.008	0.012	0.027	0.012	0.002	0.002	0	0	0.01	0.003	0.011	0	0.002	0.005
OTU754	-2.659	9.442	0.080594	0.291666	NotSig	Bacteria	Actinobacteria	Actinobacteria	Coriobacteriales	Coriobacteriaceae	Olsenella	0.021	0.079	0	0.002	0	0	0.002	0.005	0	0	0.206	0	0	0.002	0.002	0.592	0.073	0.079	0	0	0.037	0
OTU394	-1.281	11.401	0.0809405	0.291666	NotSig	Bacteria	Bacteroidetes	Bacteroidia	Bacteroidales	Porphyromonadaceae	Unassigned	0.168	0.407	0.069	0.298	0.079	0.117	0.194	0.193	0.081	0.544	0.005	0.097	0.899	1.017	0.142	0.02	0.682	0.581	0.102	0.036	0.087	0.503
OTU1674	1.347	8.847	0.0811991	0.291666	NotSig	Bacteria	Actinobacteria	Actinobacteria	Coriobacteriales	Coriobacteriaceae	Unassigned	0.061	0.024	0.077	0.015	0.063	0.002	0.086	0.046	0.118	0.095	0.062	0.048	0.027	0.027	0.005	0	0.01	0.015	0.028	0.068	0	0.056
OTU1128	-2.655	6.654	0.0812286	0.291666	NotSig	Bacteria	Firmicutes	Clostridia	Clostridiales	Eubacteriaceae	Eubacterium	0.002	0.009	0	0	0	0	0	0.015	0	0	0	0	0.002	0.007	0	0.002	0	0	0	0	0.077	0.005
OTU1699	-1.784	6.021	0.0812593	0.291666	NotSig	Bacteria	Firmicutes	Clostridia	Clostridiales	Ruminococcaceae	Unassigned	0.001	0.003	0	0.002	0	0	0	0	0	0.006	0	0	0	0.009	0	0	0.005	0.003	0.006	0	0.007	0.005
OTU1502	-1.257	9.756	0.0818165	0.293064	NotSig	Bacteria	Firmicutes	Clostridia	Clostridiales	Lachnospiraceae	Blautia	0.055	0.117	0.026	0.015	0.004	0.002	0.111	0.081	0.015	0.099	0.171	0.028	0.068	0.129	0.027	0.039	0.135	0.173	0.139	0.017	0.306	0.139
OTU1332	1.787	5.595	0.0822541	0.294029	NotSig	Bacteria	Actinobacteria	Actinobacteria	Coriobacteriales	Coriobacteriaceae	Unassigned	0.001	0	0	0	0	0	0.007	0	0	0	0	0	0	0	0	0	0	0	0	0	0	0
OTU1583	2.631	5.711	0.0832245	0.295248	NotSig	Bacteria	Firmicutes	Clostridia	Clostridiales	Clostridiaceae_1	Unassigned	0.001	0	0	0	0.013	0	0	0	0	0	0	0	0	0	0	0	0	0	0	0	0	0
OTU308	2.631	5.711	0.0832245	0.295248	NotSig	Bacteria	Proteobacteria	Betaproteobacteria	Burkholderiales	Comamonadaceae	Unassigned	0.001	0	0	0	0.013	0	0	0	0	0	0	0	0	0	0	0	0	0	0	0	0	0
OTU508	2.631	5.711	0.0832245	0.295248	NotSig	Bacteria	Bacteroidetes	Bacteroidia	Bacteroidales	Porphyromonadaceae	Unassigned	0.001	0	0	0	0.013	0	0	0	0	0	0	0	0	0	0	0	0	0	0	0	0	0
OTU142	2.209	6.224	0.0832707	0.295248	NotSig	Bacteria	Unassigned	Unassigned	Unassigned	Unassigned	Unassigned	0.005	0.001	0.005	0.005	0.016	0.002	0	0	0	0	0	0.022	0.002	0	0	0	0	0	0	0	0	0.007
OTU1292	1.256	6.787	0.0838918	0.296848	NotSig	Bacteria	Firmicutes	Clostridia	Clostridiales	Lachnospiraceae	Unassigned	0.009	0.004	0.002	0.01	0.004	0.005	0.005	0.008	0.023	0.002	0.012	0.02	0.007	0.009	0.002	0	0.003	0.003	0.006	0.006	0	0.002
OTU261	1.858	5.614	0.0847974	0.29758	NotSig	Bacteria	Firmicutes	Unassigned	Unassigned	Unassigned	Unassigned	0.001	0	0	0.002	0	0.005	0	0	0	0	0	0	0	0	0	0	0	0	0	0	0	0
OTU696	1.858	5.614	0.0847974	0.29758	NotSig	Bacteria	Bacteroidetes	Bacteroidia	Bacteroidales	Porphyromonadaceae	Unassigned	0.001	0	0	0.002	0	0.005	0	0	0	0	0	0	0	0	0	0	0	0	0	0	0	0
OTU1351	1.858	5.614	0.0848045	0.29758	NotSig	Bacteria	Firmicutes	Clostridia	Clostridiales	Ruminococcaceae	Unassigned	0.001	0	0.002	0	0	0.005	0	0	0	0	0	0	0	0	0	0	0	0	0	0	0	0
OTU771	2.627	6.123	0.0848567	0.29758	NotSig	Bacteria	Actinobacteria	Actinobacteria	Actinomycetales	Dietziaceae	Dietzia	0.005	0	0	0	0	0	0.045	0.003	0	0.002	0	0	0	0	0	0	0	0	0	0.002	0	0.002
OTU1398	1.32	8.292	0.0849551	0.29758	NotSig	Bacteria	Firmicutes	Clostridia	Clostridiales	Lachnospiraceae	Dorea	0.043	0.015	0.01	0.017	0.011	0.026	0.124	0.033	0.009	0.002	0.193	0.006	0.011	0.025	0.005	0.009	0.036	0.023	0.02	0.006	0.012	0.005
OTU1388	1.366	8.405	0.0851201	0.29758	NotSig	Bacteria	Proteobacteria	Gammaproteobacteria	Aeromonadales	Succinivibrionaceae	Succinivibrio	0.043	0.018	0.036	0.039	0.074	0.07	0.011	0.01	0.011	0.114	0.007	0.054	0.032	0.075	0.01	0.002	0.003	0	0.034	0.006	0.002	0.012
OTU1352	1.848	5.612	0.0853826	0.297902	NotSig	Bacteria	Firmicutes	Clostridia	Clostridiales	Ruminococcaceae	Unassigned	0.001	0	0	0	0.002	0.002	0	0	0.002	0	0	0	0	0	0	0	0	0	0	0	0	0
OTU526	-1.775	6.483	0.0864518	0.301031	NotSig	Bacteria	Bacteroidetes	Bacteroidia	Bacteroidales	Prevotellaceae	Prevotella	0.002	0.006	0.002	0.01	0.004	0	0	0	0	0.004	0	0	0.014	0.007	0.029	0.002	0	0	0.003	0	0.002	0.007
OTU1690	1.456	6.161	0.0871656	0.30283	NotSig	Bacteria	Firmicutes	Clostridia	Clostridiales	Ruminococcaceae	Unassigned	0.004	0.001	0.01	0.007	0	0.002	0.002	0.003	0.006	0.006	0	0.006	0	0	0	0.002	0.005	0	0	0.002	0	0.002
OTU1692	1.497	6.229	0.0877663	0.30283	NotSig	Bacteria	Firmicutes	Clostridia	Clostridiales	Ruminococcaceae	Unassigned	0.005	0.001	0.012	0.002	0.011	0.002	0.005	0	0	0.006	0	0.008	0.002	0.005	0	0.002	0	0	0	0.002	0	0.002
OTU371	-1.151	12.45	0.0877831	0.30283	NotSig	Bacteria	Bacteroidetes	Bacteroidia	Bacteroidales	Prevotellaceae	Prevotella	0.387	0.748	0.43	0.269	0.247	0.087	0.185	0.695	0.049	0.483	1.133	0.292	0.627	0.393	0.656	0.386	2.244	1.889	0.168	0.115	0.546	0.46
OTU1552	-1.525	10.273	0.0880038	0.30283	NotSig	Bacteria	Firmicutes	Clostridia	Clostridiales	Ruminococcaceae	Gemmiger	0.071	0.177	0.012	0.005	0.013	0.007	0.077	0.208	0.002	0.223	0.161	0.004	0.177	0.02	0.093	0.05	0.752	0.416	0	0.028	0.135	0.096
OTU1197	1.804	5.606	0.0888739	0.30283	NotSig	Bacteria	Firmicutes	Unassigned	Unassigned	Unassigned	Unassigned	0.001	0	0	0	0.007	0	0	0	0	0	0	0	0	0	0	0	0	0	0	0	0	0
OTU320	1.804	5.606	0.0888739	0.30283	NotSig	Bacteria	Proteobacteria	Betaproteobacteria	Burkholderiales	Alcaligenaceae	Unassigned	0.001	0	0	0	0.007	0	0	0	0	0	0	0	0	0	0	0	0	0	0	0	0	0
OTU322	1.804	5.606	0.0888739	0.30283	NotSig	Bacteria	Proteobacteria	Betaproteobacteria	Burkholderiales	Comamonadaceae	Lampropedia	0.001	0	0	0	0.007	0	0	0	0	0	0	0	0	0	0	0	0	0	0	0	0	0
OTU543	1.804	5.606	0.0888739	0.30283	NotSig	Bacteria	Bacteroidetes	Bacteroidia	Bacteroidales	Porphyromonadaceae	Unassigned	0.001	0	0	0	0.007	0	0	0	0	0	0	0	0	0	0	0	0	0	0	0	0	0
OTU617	1.804	5.606	0.0888739	0.30283	NotSig	Bacteria	Bacteroidetes	Flavobacteriia	Flavobacteriales	Flavobacteriaceae	Unassigned	0.001	0	0	0	0.007	0	0	0	0	0	0	0	0	0	0	0	0	0	0	0	0	0
OTU670	1.804	5.606	0.0888739	0.30283	NotSig	Bacteria	Bacteroidetes	Bacteroidia	Bacteroidales	Bacteroidaceae	Anaerorhabdus	0.001	0	0	0	0.007	0	0	0	0	0	0	0	0	0	0	0	0	0	0	0	0	0
OTU677	1.804	5.606	0.0888739	0.30283	NotSig	Bacteria	Bacteroidetes	Bacteroidia	Bacteroidales	Porphyromonadaceae	Unassigned	0.001	0	0	0	0.007	0	0	0	0	0	0	0	0	0	0	0	0	0	0	0	0	0
OTU1516	2.036	6.062	0.0894549	0.303294	NotSig	Bacteria	Firmicutes	Clostridia	Clostridiales	Ruminococcaceae	Unassigned	0.004	0.001	0.005	0.017	0	0	0	0	0.009	0	0.005	0.002	0.005	0	0	0	0	0	0	0	0.002	0
OTU245	1.797	5.605	0.0895306	0.303294	NotSig	Bacteria	Unassigned	Unassigned	Unassigned	Unassigned	Unassigned	0.001	0	0	0	0	0	0	0	0.006	0	0	0	0	0	0	0	0	0	0	0	0	0
OTU690	1.797	5.605	0.0895306	0.303294	NotSig	Bacteria	Bacteroidetes	Bacteroidia	Bacteroidales	Porphyromonadaceae	Unassigned	0.001	0	0	0	0	0	0	0	0.006	0	0	0	0	0	0	0	0	0	0	0	0	0
OTU473	2.421	5.68	0.0901222	0.304119	NotSig	Bacteria	Bacteroidetes	Unassigned	Unassigned	Unassigned	Unassigned	0.001	0	0	0	0	0	0	0	0	0	0	0.012	0	0	0	0	0	0	0	0	0	0
OTU699	2.421	5.68	0.0901222	0.304119	NotSig	Bacteria	Fibrobacteres	Fibrobacteria	Fibrobacterales	Fibrobacteraceae	Fibrobacter	0.001	0	0	0	0	0	0	0	0	0	0	0.012	0	0	0	0	0	0	0	0	0	0
OTU1300	-1.92	6.288	0.0915331	0.304947	NotSig	Bacteria	Firmicutes	Clostridia	Clostridiales	Ruminococcaceae	Ruminococcus	0.001	0.006	0	0	0	0	0.002	0.005	0	0	0.007	0	0	0.014	0.007	0	0	0.01	0.014	0	0.01	0
OTU388	-1.3	10.712	0.0918201	0.304947	NotSig	Bacteria	Bacteroidetes	Bacteroidia	Bacteroidales	Prevotellaceae	Prevotella	0.098	0.216	0.165	0.082	0.058	0.18	0.084	0.223	0.013	0.008	0.159	0.008	0.029	0.382	0.332	0.143	0.15	0.157	0.213	0.03	0.712	0.007
OTU1155	2.995	6.098	0.0918228	0.304947	NotSig	Bacteria	Firmicutes	Clostridia	Clostridiales	Lachnospiraceae	Unassigned	0.005	0	0	0.046	0	0	0	0	0	0	0	0.004	0	0	0.002	0	0	0	0	0	0	0
OTU903	-2.557	6.233	0.0918886	0.304947	NotSig	Bacteria	Firmicutes	Clostridia	Clostridiales	Ruminococcaceae	Pseudoflavonifractor	0.001	0.005	0	0.005	0	0.002	0	0	0	0	0	0	0	0	0	0.011	0.005	0.033	0	0	0	0
OTU654	1.808	5.902	0.0919109	0.304947	NotSig	Bacteria	Bacteroidetes	Unassigned	Unassigned	Unassigned	Unassigned	0.003	0.001	0	0.007	0.002	0	0	0.005	0	0.006	0	0.006	0	0	0	0	0.003	0.003	0	0	0	0
OTU382	1.765	5.601	0.0922902	0.304947	NotSig	Bacteria	Bacteroidetes	Bacteroidia	Bacteroidales	Prevotellaceae	Prevotella	0.001	0	0	0.002	0.004	0	0	0	0	0	0	0	0	0	0	0	0	0	0	0	0	0
OTU90	1.765	5.601	0.0922976	0.304947	NotSig	Bacteria	Spirochaetes	Spirochaetia	Spirochaetales	Spirochaetaceae	Treponema	0.001	0	0.002	0	0.004	0	0	0	0	0	0	0	0	0	0	0	0	0	0	0	0	0
OTU1344	2.41	5.676	0.0924369	0.304947	NotSig	Bacteria	Candidatus_Saccharibacteria	Unassigned	Unassigned	Unassigned	Saccharibacteria_genera_incertae_sedis	0.001	0	0	0	0.011	0	0	0	0	0	0	0	0	0	0	0	0	0	0	0	0	0
OTU232	2.41	5.676	0.0924369	0.304947	NotSig	Bacteria	Unassigned	Unassigned	Unassigned	Unassigned	Unassigned	0.001	0	0	0	0.011	0	0	0	0	0	0	0	0	0	0	0	0	0	0	0	0	0
OTU309	2.41	5.676	0.0924369	0.304947	NotSig	Bacteria	Proteobacteria	Betaproteobacteria	Burkholderiales	Alcaligenaceae	Paenalcaligenes	0.001	0	0	0	0.011	0	0	0	0	0	0	0	0	0	0	0	0	0	0	0	0	0
OTU384	2.41	5.676	0.0924369	0.304947	NotSig	Bacteria	Bacteroidetes	Bacteroidia	Bacteroidales	Porphyromonadaceae	Unassigned	0.001	0	0	0	0.011	0	0	0	0	0	0	0	0	0	0	0	0	0	0	0	0	0
OTU1015	1.763	5.6	0.0924611	0.304947	NotSig	Bacteria	Firmicutes	Clostridia	Clostridiales	Unassigned	Unassigned	0.001	0	0	0	0.002	0	0	0.005	0	0	0	0	0	0	0	0	0	0	0	0	0	0
OTU5	-1.459	11.747	0.0931369	0.30608	NotSig	Bacteria	Firmicutes	Bacilli	Lactobacillales	Streptococcaceae	Streptococcus	0.206	0.504	0.744	0.128	0.081	0.009	0.005	0.114	0.006	0.026	0.679	0.268	0.02	0.502	0.619	0.018	1.177	0.871	1.368	0.049	0.391	0.028
OTU1286	-1.863	6.549	0.0931549	0.30608	NotSig	Bacteria	Unassigned	Unassigned	Unassigned	Unassigned	Unassigned	0.002	0.008	0	0.005	0	0	0.004	0	0	0.002	0.012	0	0.011	0	0	0.005	0.005	0.003	0	0	0.045	0.007
OTU818	1.239	8.814	0.0938541	0.307799	NotSig	Bacteria	Unassigned	Unassigned	Unassigned	Unassigned	Unassigned	0.056	0.024	0.134	0.017	0.099	0.061	0.091	0.01	0.073	0.049	0.01	0.02	0.041	0.054	0.01	0.009	0.005	0	0.043	0.036	0.035	0.009
OTU61	2.707	6.923	0.0954986	0.312606	NotSig	Bacteria	Unassigned	Unassigned	Unassigned	Unassigned	Unassigned	0.014	0.002	0.084	0	0.054	0	0.004	0	0	0	0	0	0.014	0	0	0	0	0	0	0	0	0.007
OTU723	1.726	5.595	0.0958004	0.312612	NotSig	Bacteria	Tenericutes	Mollicutes	Anaeroplasmatales	Anaeroplasmataceae	Anaeroplasma	0.001	0	0.005	0	0.002	0	0	0	0	0	0	0	0	0	0	0	0	0	0	0	0	0
OTU882	1.733	6.374	0.0958673	0.312612	NotSig	Bacteria	Firmicutes	Clostridia	Clostridiales	Unassigned	Unassigned	0.007	0.002	0.002	0.002	0.004	0	0.039	0.01	0.002	0	0.002	0.002	0.007	0	0	0	0.003	0.008	0	0	0	0
OTU12	1.343	11.896	0.0962491	0.312612	NotSig	Bacteria	Proteobacteria	Deltaproteobacteria	Desulfovibrionales	Desulfovibrionaceae	Desulfovibrio	0.531	0.235	0.557	0.46	0.375	1.609	1.429	0.01	0.079	0.331	0.32	0.135	0.883	0.766	0.042	0.007	0.342	0.076	0.065	0.034	0.095	0.045
OTU1180	1.727	5.596	0.0962499	0.312612	NotSig	Bacteria	Firmicutes	Clostridia	Clostridiales	Unassigned	Unassigned	0.001	0	0.002	0	0	0.002	0	0	0	0.002	0	0	0	0	0	0	0	0	0	0	0	0
OTU778	1.487	9.757	0.0963948	0.312612	NotSig	Bacteria	Firmicutes	Unassigned	Unassigned	Unassigned	Unassigned	0.126	0.039	0.459	0.107	0.258	0.035	0.081	0.018	0.09	0.034	0.067	0.109	0.068	0	0.002	0.025	0.013	0	0	0.186	0.065	0.035
OTU791	-3.596	7.762	0.0980042	0.314464	NotSig	Bacteria	Actinobacteria	Actinobacteria	Coriobacteriales	Coriobacteriaceae	Olsenella	0.003	0.021	0	0	0	0	0	0	0	0	0.03	0	0	0	0	0.207	0	0	0	0	0	0
OTU684	1.705	5.593	0.0980595	0.314464	NotSig	Bacteria	Bacteroidetes	Bacteroidia	Bacteroidales	Porphyromonadaceae	Unassigned	0.001	0	0	0	0	0	0.002	0	0.004	0	0	0	0	0	0	0	0	0	0	0	0	0
OTU1256	-1.752	9.026	0.0985067	0.314464	NotSig	Bacteria	Firmicutes	Clostridia	Clostridiales	Unassigned	Unassigned	0.025	0.061	0	0	0	0	0.005	0.099	0	0.026	0.114	0.01	0.011	0.12	0.061	0.232	0.018	0.058	0.063	0	0.025	0.023
OTU1126	1.391	7.009	0.0986392	0.314464	NotSig	Bacteria	Firmicutes	Clostridia	Clostridiales	Ruminococcaceae	Oscillibacter	0.013	0.005	0.007	0.053	0.018	0.002	0.007	0.008	0.008	0.006	0.005	0.016	0.002	0	0.002	0	0.013	0	0.026	0.002	0.002	0
OTU621	2.465	6.045	0.0988471	0.314464	NotSig	Bacteria	Bacteroidetes	Bacteroidia	Bacteroidales	Porphyromonadaceae	Unassigned	0.003	0.001	0	0	0	0.021	0.002	0	0.008	0	0	0	0.002	0	0	0	0	0	0.003	0	0	0
OTU163	-2.834	6.33	0.0991953	0.314464	NotSig	Bacteria	Unassigned	Unassigned	Unassigned	Unassigned	Unassigned	0.001	0.006	0	0	0	0	0	0.008	0	0	0	0	0	0	0	0	0	0	0	0.051	0.002	0.002
OTU359	1.687	5.59	0.099379	0.314464	NotSig	Bacteria	Unassigned	Unassigned	Unassigned	Unassigned	Unassigned	0.001	0	0.007	0	0	0	0	0	0	0	0	0	0	0	0	0	0	0	0	0	0	0
OTU573	2.224	5.652	0.0995014	0.314464	NotSig	Bacteria	Bacteroidetes	Bacteroidia	Bacteroidales	Prevotellaceae	Prevotella	0.001	0	0.012	0	0	0	0	0	0	0	0	0	0	0	0	0	0	0	0	0	0	0
OTU511	1.684	5.59	0.0995995	0.314464	NotSig	Bacteria	Bacteroidetes	Unassigned	Unassigned	Unassigned	Unassigned	0.001	0	0	0.005	0	0	0	0	0	0	0	0.002	0	0	0	0	0	0	0	0	0	0
OTU1153	1.682	5.59	0.0998436	0.314464	NotSig	Bacteria	Firmicutes	Clostridia	Clostridiales	Unassigned	Unassigned	0.001	0	0	0.002	0	0	0	0	0	0	0	0.004	0	0	0	0	0	0	0	0	0	0
OTU1645	-1.661	5.594	0.0998463	0.314464	NotSig	Bacteria	Actinobacteria	Actinobacteria	Coriobacteriales	Coriobacteriaceae	Olsenella	0	0	0	0	0	0	0	0	0	0	0	0	0	0	0	0.005	0	0	0	0	0	0
OTU1235	2.212	5.65	0.0999713	0.314464	NotSig	Bacteria	Firmicutes	Clostridia	Clostridiales	Lachnospiraceae	Unassigned	0.001	0	0	0	0	0	0	0	0	0	0	0.01	0	0	0	0	0	0	0	0	0	0
OTU1009	2.159	5.644	0.100008	0.314464	NotSig	Bacteria	Firmicutes	Clostridia	Clostridiales	Ruminococcaceae	Unassigned	0.001	0	0	0	0	0	0.011	0	0	0	0	0	0	0	0	0	0	0	0	0	0	0
OTU243	1.679	5.589	0.100088	0.314464	NotSig	Bacteria	Unassigned	Unassigned	Unassigned	Unassigned	Unassigned	0.001	0	0	0	0	0	0	0	0	0	0	0.006	0	0	0	0	0	0	0	0	0	0
OTU73	1.679	5.589	0.100088	0.314464	NotSig	Bacteria	Unassigned	Unassigned	Unassigned	Unassigned	Unassigned	0.001	0	0	0	0	0	0	0	0	0	0	0.006	0	0	0	0	0	0	0	0	0	0
OTU737	1.095	12.45	0.100165	0.314464	NotSig	Bacteria	Firmicutes	Clostridia	Clostridiales	Ruminococcaceae	Unassigned	0.798	0.372	0.665	0.3	0.306	1.173	1.121	1.41	0.295	1.939	0.634	0.133	0.756	0.368	0.103	0.023	0.925	0.571	0.239	0.147	0.289	0.298
OTU943	-2.214	5.964	0.100192	0.314464	NotSig	Bacteria	Firmicutes	Clostridia	Clostridiales	Ruminococcaceae	Unassigned	0	0.003	0.002	0	0	0	0	0	0.002	0	0	0	0.016	0.005	0	0	0	0	0	0	0	0.014
OTU1377	1.678	5.589	0.100384	0.314464	NotSig	Bacteria	Firmicutes	Clostridia	Clostridiales	Unassigned	Unassigned	0.001	0	0	0	0	0	0	0.005	0	0.002	0	0	0	0	0	0	0	0	0	0	0	0
OTU1723	1.678	5.589	0.100384	0.314464	NotSig	Bacteria	Firmicutes	Clostridia	Clostridiales	Ruminococcaceae	Unassigned	0.001	0	0	0	0	0	0	0.005	0	0.002	0	0	0	0	0	0	0	0	0	0	0	0
OTU1399	-1.662	7.615	0.101257	0.316125	NotSig	Bacteria	Firmicutes	Clostridia	Clostridiales	Unassigned	Unassigned	0.008	0.026	0	0.017	0	0.002	0.03	0.005	0	0.002	0.005	0.016	0.131	0	0.007	0.002	0	0	0.034	0.006	0.022	0.054
OTU682	-1.356	7.421	0.101276	0.316125	NotSig	Bacteria	Bacteroidetes	Bacteroidia	Bacteroidales	Porphyromonadaceae	Unassigned	0.008	0.02	0.019	0.017	0.002	0.002	0.004	0.003	0.002	0.016	0.005	0.008	0.007	0.007	0.005	0.002	0	0.005	0.117	0.038	0.002	0.012
OTU1727	-1.637	5.591	0.101839	0.317315	NotSig	Bacteria	Firmicutes	Clostridia	Clostridiales	Ruminococcaceae	Anaerotruncus	0	0	0	0	0	0	0	0	0	0	0	0	0	0	0.002	0.002	0	0	0	0	0	0
OTU1175	1.657	5.587	0.102372	0.318411	NotSig	Bacteria	Firmicutes	Clostridia	Clostridiales	Unassigned	Unassigned	0.001	0	0	0	0	0	0	0.003	0	0.002	0	0.002	0	0	0	0	0	0	0	0	0	0
OTU106	1.277	9.038	0.102982	0.319738	NotSig	Bacteria	Unassigned	Unassigned	Unassigned	Unassigned	Unassigned	0.071	0.029	0.022	0.121	0.013	0.023	0	0.228	0.039	0.01	0.007	0.245	0.038	0.038	0.017	0.011	0.023	0.041	0.023	0.019	0.015	0.059
OTU1578	2.088	5.822	0.103203	0.319856	NotSig	Bacteria	Proteobacteria	Epsilonproteobacteria	Campylobacterales	Helicobacteraceae	Helicobacter	0.002	0	0	0.002	0	0	0	0	0.011	0.002	0	0.002	0	0	0	0	0	0	0	0	0.002	0
OTU773	1.628	5.583	0.105177	0.324738	NotSig	Bacteria	Actinobacteria	Actinobacteria	Actinomycetales	Micrococcaceae	Unassigned	0.001	0	0.002	0	0	0	0.002	0	0	0	0	0.002	0	0	0	0	0	0	0	0	0	0
OTU1503	1.628	5.583	0.105203	0.324738	NotSig	Bacteria	Firmicutes	Clostridia	Clostridiales	Ruminococcaceae	Unassigned	0.001	0	0.002	0	0	0	0.002	0	0	0	0.002	0	0	0	0	0	0	0	0	0	0	0
OTU249	-1.602	5.698	0.105335	0.324738	NotSig	Bacteria	Proteobacteria	Gammaproteobacteria	Legionellales	Coxiellaceae	Diplorickettsia	0	0.001	0	0.002	0	0	0	0	0	0	0	0	0	0.002	0	0	0	0	0.003	0.002	0.002	0.002
OTU1226	-1.585	5.584	0.106495	0.326865	NotSig	Bacteria	Proteobacteria	Gammaproteobacteria	Aeromonadales	Succinivibrionaceae	Anaerobiospirillum	0	0	0	0	0	0	0	0	0	0	0	0	0	0	0	0.002	0	0	0	0	0.002	0
OTU444	1.728	7.008	0.106558	0.326865	NotSig	Bacteria	Bacteroidetes	Bacteroidia	Bacteroidales	Prevotellaceae	Prevotella	0.013	0.004	0.002	0.046	0.02	0	0	0	0.004	0.008	0	0.054	0.016	0.002	0.005	0.002	0	0	0	0.006	0	0.005
OTU45	-1.116	13.065	0.106586	0.326865	NotSig	Bacteria	Bacteroidetes	Bacteroidia	Bacteroidales	Unassigned	Unassigned	0.582	1.01	1.095	1.472	0.499	0.108	0.457	0.637	0.329	0.404	0.287	0.537	0.949	0.382	4.911	0.266	1.117	0.462	0.682	0.455	0.638	0.242
OTU1564	-1.574	5.583	0.107592	0.329372	NotSig	Bacteria	Firmicutes	Clostridia	Clostridiales	Ruminococcaceae	Unassigned	0	0	0	0	0	0	0	0	0	0	0	0	0	0	0	0.002	0.003	0	0	0	0	0
OTU904	1.472	6.131	0.109288	0.333848	NotSig	Bacteria	Firmicutes	Clostridia	Clostridiales	Unassigned	Unassigned	0.004	0.001	0.01	0.005	0.002	0.002	0	0	0.002	0.002	0.015	0.004	0.005	0	0	0	0.005	0	0	0	0.002	0
OTU353	-1.55	5.579	0.109628	0.333848	NotSig	Bacteria	Firmicutes	Unassigned	Unassigned	Unassigned	Unassigned	0	0.001	0	0	0	0	0	0	0	0	0	0	0	0	0.002	0	0.003	0	0	0	0	0
OTU549	-1.55	5.579	0.109628	0.333848	NotSig	Bacteria	Bacteroidetes	Bacteroidia	Bacteroidales	Prevotellaceae	Prevotella	0	0.001	0	0	0	0	0	0	0	0	0	0	0	0	0.002	0	0.003	0	0	0	0	0
OTU1488	1.714	6.335	0.109854	0.333956	NotSig	Bacteria	Firmicutes	Clostridia	Clostridiales	Lachnospiraceae	Unassigned	0.006	0.002	0.029	0	0.018	0.002	0	0.003	0.002	0	0.002	0.002	0	0	0.002	0	0.003	0	0.009	0	0	0.002
OTU1270	-1.126	10.55	0.110717	0.335995	NotSig	Bacteria	Firmicutes	Clostridia	Clostridiales	Unassigned	Unassigned	0.106	0.198	0.045	0.114	0.007	0.007	0.043	0.211	0.013	0.061	0.491	0.066	0.118	0.409	0.157	0.15	0.106	0.17	0.364	0.066	0.217	0.225
OTU1565	1.572	5.577	0.110945	0.336103	NotSig	Bacteria	Firmicutes	Clostridia	Clostridiales	Ruminococcaceae	Unassigned	0.001	0	0	0	0	0	0.004	0	0	0	0	0.002	0	0	0	0	0	0	0	0	0	0
OTU1403	-1.907	8.681	0.111351	0.336749	NotSig	Bacteria	Firmicutes	Clostridia	Clostridiales	Lachnospiraceae	Unassigned	0.018	0.047	0.024	0.002	0.011	0	0.002	0.02	0	0.006	0.109	0.004	0	0.178	0	0.22	0.031	0.025	0	0	0.017	0
OTU363	1.163	12.485	0.112065	0.338324	NotSig	Bacteria	Bacteroidetes	Unassigned	Unassigned	Unassigned	Unassigned	0.694	0.316	0.237	0.533	0.465	2.862	0.122	0.424	1.127	0.4	0.436	0.336	0.448	0.176	0.025	0.688	0.179	0.152	0.1	0.22	0.81	0.366
OTU340	1.553	5.71	0.112425	0.338453	NotSig	Bacteria	Spirochaetes	Spirochaetia	Spirochaetales	Spirochaetaceae	Unassigned	0.001	0	0.002	0.002	0	0	0	0	0.002	0.002	0.002	0.002	0	0	0	0	0	0	0	0	0	0.002
OTU438	2.056	7.511	0.112757	0.338453	NotSig	Bacteria	Bacteroidetes	Bacteroidia	Bacteroidales	Prevotellaceae	Prevotella	0.025	0.005	0.005	0.191	0.002	0	0	0	0.026	0.006	0.002	0.012	0	0.005	0.02	0	0	0	0.026	0	0	0
OTU1427	-1.559	7.399	0.112858	0.338453	NotSig	Bacteria	Firmicutes	Clostridia	Clostridiales	Lachnospiraceae	Coprococcus	0.007	0.02	0	0.027	0	0	0.007	0.023	0	0	0.015	0	0.02	0.016	0.01	0	0.023	0.038	0.045	0	0.01	0.038
OTU1062	-1.51	5.574	0.113269	0.338453	NotSig	Bacteria	Firmicutes	Unassigned	Unassigned	Unassigned	Unassigned	0	0	0	0	0	0	0	0	0	0	0	0	0	0	0	0	0	0	0	0	0.005	0
OTU174	-1.51	5.574	0.113269	0.338453	NotSig	Bacteria	Unassigned	Unassigned	Unassigned	Unassigned	Unassigned	0	0	0	0	0	0	0	0	0	0	0	0	0	0	0	0	0	0	0	0	0.005	0
OTU355	-1.51	5.574	0.113269	0.338453	NotSig	Bacteria	Firmicutes	Unassigned	Unassigned	Unassigned	Unassigned	0	0	0	0	0	0	0	0	0	0	0	0	0	0	0	0	0	0	0	0	0.005	0
OTU46	1.373	12.37	0.113716	0.339209	NotSig	Bacteria	Bacteroidetes	Bacteroidia	Bacteroidales	Porphyromonadaceae	Unassigned	0.805	0.285	0.476	1.048	0.294	0.04	0.264	2.09	0.68	1.386	0.022	1.754	0.523	0.007	0.032	0.002	0.029	0.025	0.367	1.391	0.149	0.329
OTU1013	-1.498	5.573	0.114389	0.340055	NotSig	Bacteria	Firmicutes	Clostridia	Clostridiales	Ruminococcaceae	Unassigned	0	0.001	0	0	0	0	0	0	0	0	0	0	0	0	0	0	0.003	0	0	0	0.002	0
OTU1327	-1.498	5.573	0.114389	0.340055	NotSig	Bacteria	Firmicutes	Clostridia	Clostridiales	Ruminococcaceae	Clostridium_IV	0	0.001	0	0	0	0	0	0	0	0	0	0	0	0	0	0	0.003	0	0	0	0.002	0
OTU137	-2.184	6.544	0.114634	0.340203	NotSig	Bacteria	Proteobacteria	Betaproteobacteria	Unassigned	Unassigned	Unassigned	0.002	0.009	0.002	0	0.002	0	0	0.013	0	0	0	0	0.063	0	0.002	0	0	0	0	0	0.005	0.021
OTU1460	1.803	6.173	0.115424	0.341076	NotSig	Bacteria	Firmicutes	Clostridia	Clostridiales	Ruminococcaceae	Unassigned	0.004	0.001	0	0	0.007	0	0.004	0	0.013	0.014	0.005	0	0	0	0	0.002	0	0.003	0.006	0	0	0
OTU341	2.627	5.902	0.115473	0.341076	NotSig	Bacteria	Firmicutes	Erysipelotrichia	Erysipelotrichales	Erysipelotrichaceae	Erysipelothrix	0.003	0	0	0.012	0.016	0	0	0	0	0	0	0	0.002	0	0	0	0	0	0	0	0	0
OTU600	-1.487	5.571	0.115513	0.341076	NotSig	Bacteria	Bacteroidetes	Bacteroidia	Bacteroidales	Prevotellaceae	Prevotella	0	0.001	0	0	0	0	0	0	0	0	0	0	0	0	0	0	0.005	0	0	0	0	0
OTU1726	1.517	5.57	0.116648	0.342859	NotSig	Bacteria	Actinobacteria	Actinobacteria	Coriobacteriales	Coriobacteriaceae	Unassigned	0.001	0	0	0	0	0	0.005	0	0	0	0	0	0	0	0	0	0	0	0	0	0	0
OTU1371	-1.472	5.569	0.117025	0.342859	NotSig	Bacteria	Proteobacteria	Epsilonproteobacteria	Campylobacterales	Campylobacteraceae	Campylobacter	0	0	0	0	0	0	0	0	0	0	0	0	0	0	0	0	0	0	0	0.004	0	0
OTU1716	-1.472	5.569	0.117026	0.342859	NotSig	Bacteria	Firmicutes	Clostridia	Clostridiales	Ruminococcaceae	Unassigned	0	0.001	0	0	0	0	0	0	0	0	0	0	0	0	0	0	0.003	0.003	0	0	0	0
OTU305	-1.472	5.569	0.117026	0.342859	NotSig	Bacteria	Unassigned	Unassigned	Unassigned	Unassigned	Unassigned	0	0.001	0	0	0	0	0	0	0	0	0	0	0	0	0	0	0.003	0.003	0	0	0	0
OTU918	1.395	5.935	0.117098	0.342859	NotSig	Bacteria	Firmicutes	Clostridia	Unassigned	Unassigned	Unassigned	0.003	0.001	0	0	0.002	0.002	0.005	0.005	0.002	0.006	0.002	0	0	0	0	0.002	0	0	0.003	0	0	0.002
OTU148	-1.24	7.639	0.117426	0.343244	NotSig	Bacteria	Unassigned	Unassigned	Unassigned	Unassigned	Unassigned	0.01	0.022	0.002	0.019	0.002	0	0	0.02	0.004	0.01	0.035	0.01	0.018	0.009	0.005	0.007	0.003	0.005	0.037	0.051	0.025	0.059
OTU365	1.579	7.994	0.117725	0.343545	NotSig	Bacteria	Bacteroidetes	Bacteroidia	Bacteroidales	Prevotellaceae	Alloprevotella	0.035	0.011	0.179	0.063	0.013	0	0.005	0.008	0.021	0	0.055	0.01	0.048	0.002	0.022	0	0	0.003	0.003	0.002	0	0.028
OTU1191	-1.47	5.57	0.117985	0.343729	NotSig	Bacteria	Firmicutes	Clostridia	Clostridiales	Unassigned	Unassigned	0	0	0	0	0	0	0	0	0	0	0	0	0.002	0	0.002	0	0	0	0	0	0	0
OTU1651	-1.764	6.051	0.118504	0.344667	NotSig	Bacteria	Firmicutes	Clostridia	Clostridiales	Lachnospiraceae	Unassigned	0.001	0.004	0.005	0	0.002	0	0.002	0	0	0	0	0	0.002	0	0.002	0	0.01	0.003	0.02	0	0	0
OTU1649	-1.453	5.567	0.118868	0.34515	NotSig	Bacteria	Firmicutes	Clostridia	Clostridiales	Ruminococcaceae	Unassigned	0	0.001	0	0	0	0	0	0	0	0	0	0	0	0	0	0	0	0	0.006	0	0	0
OTU719	1.087	11.882	0.119481	0.346355	NotSig	Bacteria	Firmicutes	Clostridia	Clostridiales	Ruminococcaceae	Unassigned	0.458	0.244	0.287	0.15	0.088	1.644	0.455	0.142	0.781	0.337	0.297	0.4	0.562	0.113	0.194	0.089	0.117	0.086	0.08	0.222	0.162	0.812
OTU905	-1.743	6.039	0.119772	0.346625	NotSig	Bacteria	Firmicutes	Clostridia	Clostridiales	Ruminococcaceae	Unassigned	0.001	0.003	0	0.002	0	0	0	0	0	0.002	0.005	0	0	0	0.002	0.007	0	0.005	0.003	0	0.012	0
OTU584	-1.434	5.565	0.120906	0.349329	NotSig	Bacteria	Bacteroidetes	Bacteroidia	Bacteroidales	Prevotellaceae	Prevotella	0	0	0	0	0	0	0	0	0	0	0	0	0	0	0	0	0.003	0	0	0	0	0.002
OTU332	-1.788	6.044	0.121891	0.35143	NotSig	Bacteria	Firmicutes	Erysipelotrichia	Erysipelotrichales	Erysipelotrichaceae	Unassigned	0.001	0.004	0	0	0	0	0	0	0	0.002	0.007	0	0	0.005	0	0	0.008	0.008	0.003	0	0	0.014
OTU829	1.73	7.533	0.122035	0.35143	NotSig	Bacteria	Firmicutes	Clostridia	Clostridiales	Unassigned	Unassigned	0.026	0.006	0	0.002	0	0	0.014	0.003	0	0.041	0.201	0	0.014	0.009	0.015	0	0.008	0.005	0.006	0	0.002	0.005
OTU1572	-1.418	5.563	0.122636	0.352418	NotSig	Bacteria	Firmicutes	Clostridia	Clostridiales	Unassigned	Unassigned	0	0	0	0	0	0	0	0	0	0	0	0	0	0.002	0	0	0	0	0	0.002	0	0
OTU403	1.864	8.902	0.122782	0.352418	NotSig	Bacteria	Bacteroidetes	Bacteroidia	Bacteroidales	Prevotellaceae	Prevotella	0.072	0.022	0	0.237	0.009	0	0.016	0.015	0.148	0.25	0	0.04	0.127	0.007	0	0	0	0	0.014	0.002	0	0.066
OTU821	1.998	6.936	0.123232	0.353132	NotSig	Bacteria	Firmicutes	Clostridia	Clostridiales	Unassigned	Unassigned	0.012	0.003	0	0.012	0	0	0.002	0	0.008	0.004	0.002	0.097	0.005	0	0.015	0	0	0	0	0	0	0.007
OTU820	-1.47	7.001	0.123461	0.353207	NotSig	Bacteria	Firmicutes	Clostridia	Clostridiales	Unassigned	Unassigned	0.004	0.014	0	0	0.002	0	0.004	0.005	0.013	0.014	0.005	0	0.014	0.02	0.002	0	0.003	0.003	0.08	0	0.005	0.014
OTU1535	-1.592	5.679	0.124253	0.354894	NotSig	Bacteria	Firmicutes	Clostridia	Clostridiales	Ruminococcaceae	Unassigned	0	0.001	0	0	0	0	0.002	0	0	0	0	0	0.005	0	0	0	0	0.003	0.003	0	0	0.002
OTU206	2.865	6.346	0.124781	0.355302	NotSig	Bacteria	Firmicutes	Negativicutes	Selenomonadales	Veillonellaceae	Dialister	0.008	0	0	0	0	0	0	0	0	0	0.067	0.01	0	0	0	0.005	0	0	0	0	0	0
OTU1617	-1.399	5.561	0.124803	0.355302	NotSig	Bacteria	Firmicutes	Clostridia	Clostridiales	Lachnospiraceae	Unassigned	0	0	0	0	0	0	0	0	0	0	0	0	0.002	0	0	0	0	0	0	0.002	0	0
OTU1003	1.475	7.166	0.125546	0.356837	NotSig	Bacteria	Firmicutes	Clostridia	Clostridiales	Ruminococcaceae	Unassigned	0.014	0.005	0	0.027	0.002	0	0.004	0.013	0.041	0.032	0	0.026	0	0	0	0.002	0.01	0.003	0.011	0.015	0.005	0.002
OTU346	-1.382	5.559	0.126395	0.358396	NotSig	Bacteria	Firmicutes	Erysipelotrichia	Erysipelotrichales	Erysipelotrichaceae	Unassigned	0	0	0	0	0	0	0	0	0	0	0	0	0	0	0	0	0	0	0	0	0	0.005
OTU135	-1.888	6.856	0.126505	0.358396	NotSig	Bacteria	Unassigned	Unassigned	Unassigned	Unassigned	Unassigned	0.003	0.011	0.002	0	0	0	0	0	0	0	0.007	0.02	0.011	0.038	0.002	0.025	0	0.003	0	0	0	0.028
OTU48	1.645	10.848	0.128132	0.36096	NotSig	Bacteria	Bacteroidetes	Bacteroidia	Bacteroidales	Prevotellaceae	Prevotella	0.28	0.074	0.624	0.012	1.272	0.063	0.005	0.084	0	0	0.637	0.099	0.02	0	0.219	0.159	0	0.008	0.21	0.021	0.07	0.028
OTU37	1.089	9.158	0.128345	0.36096	NotSig	Bacteria	Bacteroidetes	Unassigned	Unassigned	Unassigned	Unassigned	0.075	0.035	0.053	0.245	0.135	0.049	0.143	0.003	0.024	0.022	0.005	0.07	0.068	0.075	0.012	0.02	0.036	0.038	0.028	0.015	0.015	0.038
OTU1544	-1.364	5.557	0.128352	0.36096	NotSig	Bacteria	Firmicutes	Clostridia	Clostridiales	Ruminococcaceae	Unassigned	0	0	0	0	0	0	0	0	0	0	0	0	0	0.005	0	0	0	0	0	0	0	0
OTU530	-1.364	5.557	0.128352	0.36096	NotSig	Bacteria	Bacteroidetes	Bacteroidia	Bacteroidales	Porphyromonadaceae	Unassigned	0	0	0	0	0	0	0	0	0	0	0	0	0	0.005	0	0	0	0	0	0	0	0
OTU1260	-1.354	8.129	0.128442	0.36096	NotSig	Bacteria	Firmicutes	Clostridia	Clostridiales	Eubacteriaceae	Eubacterium	0.014	0.033	0.017	0.007	0.013	0	0.029	0.005	0.009	0.061	0	0.002	0	0.025	0.007	0.002	0.01	0.013	0.068	0.109	0.082	0.009
OTU1144	1.616	5.843	0.129795	0.364175	NotSig	Bacteria	Firmicutes	Clostridia	Clostridiales	Unassigned	Unassigned	0.002	0	0.002	0.002	0	0.002	0.005	0	0	0	0	0.008	0.002	0	0	0	0	0	0	0.002	0	0
OTU1201	-1.325	5.553	0.132787	0.37091	NotSig	Bacteria	Unassigned	Unassigned	Unassigned	Unassigned	Unassigned	0	0	0	0	0	0	0	0	0	0	0	0	0.005	0	0	0	0	0	0	0	0	0
OTU1222	-1.325	5.553	0.132787	0.37091	NotSig	Bacteria	Firmicutes	Clostridia	Clostridiales	Ruminococcaceae	Unassigned	0	0	0	0	0	0	0	0	0	0	0	0	0.005	0	0	0	0	0	0	0	0	0
OTU966	1.682	5.725	0.132832	0.37091	NotSig	Bacteria	Firmicutes	Clostridia	Clostridiales	Ruminococcaceae	Unassigned	0.001	0	0	0	0.002	0	0.005	0	0	0	0.002	0.004	0	0	0	0	0	0	0	0	0	0.002
OTU224	-2.526	5.887	0.133655	0.372613	NotSig	Bacteria	Unassigned	Unassigned	Unassigned	Unassigned	Unassigned	0	0.002	0	0	0.002	0	0	0	0	0	0	0	0	0	0	0.016	0	0	0	0	0.002	0
OTU31	-1.073	11.803	0.135	0.375763	NotSig	Bacteria	Bacteroidetes	Bacteroidia	Bacteroidales	Prevotellaceae	Prevotella	0.254	0.445	0.299	0.107	0.13	0.08	0.654	0.403	0.039	0.477	0.255	0.095	1.085	0.142	1.617	0.075	0.308	0.168	0.043	0.226	0.132	0.65
OTU865	1.824	6.758	0.136763	0.379831	NotSig	Bacteria	Firmicutes	Clostridia	Clostridiales	Ruminococcaceae	Unassigned	0.011	0.003	0	0.056	0	0	0.004	0.03	0	0	0.002	0.02	0.002	0	0	0	0.008	0.013	0	0	0	0.005
OTU1251	2.062	5.915	0.137134	0.379831	NotSig	Bacteria	Firmicutes	Clostridia	Clostridiales	Ruminococcaceae	Unassigned	0.002	0	0.002	0	0	0.014	0	0	0	0.006	0	0.002	0.005	0	0	0	0	0	0	0	0	0
OTU407	1.508	5.582	0.13733	0.379831	NotSig	Bacteria	Bacteroidetes	Unassigned	Unassigned	Unassigned	Unassigned	0	0	0	0	0	0.005	0	0	0	0	0	0	0	0	0	0	0	0	0	0	0	0
OTU676	1.508	5.582	0.13733	0.379831	NotSig	Bacteria	Bacteroidetes	Bacteroidia	Bacteroidales	Porphyromonadaceae	Unassigned	0	0	0	0	0	0.005	0	0	0	0	0	0	0	0	0	0	0	0	0	0	0	0
OTU578	1.33	8.584	0.138456	0.38234	NotSig	Bacteria	Bacteroidetes	Bacteroidia	Bacteroidales	Prevotellaceae	Prevotella	0.051	0.02	0.165	0.068	0.144	0.009	0.036	0.015	0.032	0.01	0.025	0.002	0.093	0.02	0.007	0	0.003	0.005	0	0.036	0	0.04
OTU888	-1.313	6.602	0.138871	0.38288	NotSig	Bacteria	Firmicutes	Clostridia	Clostridiales	Ruminococcaceae	Unassigned	0.003	0.008	0	0.002	0	0.002	0.009	0	0.008	0	0.002	0.004	0.005	0	0.002	0.005	0.023	0.03	0.003	0.002	0.002	0.002
OTU1434	-2.241	6.993	0.139285	0.383417	NotSig	Bacteria	Unassigned	Unassigned	Unassigned	Unassigned	Unassigned	0.003	0.015	0	0	0	0	0	0.023	0	0.008	0	0	0.018	0.099	0	0.002	0	0	0	0	0	0.033
OTU741	-1.036	12.866	0.140757	0.384635	NotSig	Bacteria	Firmicutes	Clostridia	Clostridiales	Ruminococcaceae	Gemmiger	0.556	1.023	0.268	0.366	0.137	0.129	0.647	1.136	0.16	0.414	2.275	0.024	0.58	1.767	0.054	0.316	1.858	1.112	1.769	0.868	1.298	0.608
OTU127	1.148	6.862	0.141137	0.384635	NotSig	Bacteria	Unassigned	Unassigned	Unassigned	Unassigned	Unassigned	0.01	0.004	0.005	0.012	0.025	0.002	0.016	0	0.015	0.018	0	0.006	0.014	0.002	0.007	0.002	0.003	0	0.003	0.002	0.002	0.007
OTU138	1.971	7.449	0.141424	0.384635	NotSig	Bacteria	Spirochaetes	Spirochaetia	Spirochaetales	Spirochaetaceae	Treponema	0.017	0.005	0.005	0.007	0.002	0.148	0.005	0	0	0	0.002	0	0.018	0	0	0	0	0.003	0	0	0.027	0.005
OTU1563	-1.729	5.715	0.141725	0.384635	NotSig	Bacteria	Firmicutes	Clostridia	Clostridiales	Ruminococcaceae	Unassigned	0	0.001	0	0	0	0	0	0	0	0	0.002	0	0.007	0	0	0	0.005	0	0	0	0	0.002
OTU1382	-1.501	9.463	0.142304	0.384635	NotSig	Bacteria	Firmicutes	Clostridia	Clostridiales	Lachnospiraceae	Unassigned	0.039	0.105	0.026	0.119	0.016	0	0.16	0.03	0	0	0.04	0.004	0.025	0.411	0.113	0	0.023	0.03	0.367	0	0.052	0.023
OTU338	-1.528	6.176	0.142402	0.384635	NotSig	Bacteria	Unassigned	Unassigned	Unassigned	Unassigned	Unassigned	0.001	0.004	0	0	0	0	0	0.008	0	0	0.005	0.002	0.005	0.005	0	0.005	0.003	0	0.011	0	0	0.016
OTU295	-1.046	9.454	0.142511	0.384635	NotSig	Bacteria	Fibrobacteres	Fibrobacteria	Fibrobacterales	Fibrobacteraceae	Fibrobacter	0.043	0.087	0.012	0.102	0.031	0.066	0.013	0.036	0.028	0.067	0.01	0.068	0.154	0.047	0.118	0.02	0.008	0.008	0.182	0.175	0.045	0.117
OTU1310	-1.805	5.73	0.142854	0.384635	NotSig	Bacteria	Firmicutes	Clostridia	Clostridiales	Ruminococcaceae	Clostridium_IV	0	0.002	0	0.002	0	0	0	0	0	0	0	0	0	0.002	0	0	0	0.003	0.011	0	0	0
OTU1605	1.573	5.875	0.143042	0.384635	NotSig	Bacteria	Firmicutes	Clostridia	Clostridiales	Lachnospiraceae	Unassigned	0.002	0	0.002	0.005	0	0	0	0	0.002	0.01	0	0.004	0	0	0	0.002	0.003	0	0	0	0	0
OTU1708	1.455	5.576	0.143127	0.384635	NotSig	Bacteria	Firmicutes	Clostridia	Clostridiales	Ruminococcaceae	Unassigned	0	0	0	0	0.002	0.002	0	0	0	0	0	0	0	0	0	0	0	0	0	0	0	0
OTU667	1.308	6.26	0.143146	0.384635	NotSig	Bacteria	Bacteroidetes	Unassigned	Unassigned	Unassigned	Unassigned	0.004	0.002	0.002	0.002	0.004	0.002	0.007	0.003	0.017	0	0.005	0	0.002	0	0	0	0	0.005	0	0.004	0.002	0.002
OTU993	1.452	5.575	0.143473	0.384635	NotSig	Bacteria	Firmicutes	Unassigned	Unassigned	Unassigned	Unassigned	0	0	0	0	0	0.002	0	0	0.002	0	0	0	0	0	0	0	0	0	0	0	0	0
OTU1368	-1.109	10.789	0.143816	0.384635	NotSig	Bacteria	Firmicutes	Clostridia	Clostridiales	Ruminococcaceae	Unassigned	0.117	0.235	0.026	0.087	0.011	0.082	0.353	0.041	0.049	0.03	0.273	0.219	0.059	0.224	0.049	0.007	0.63	0.477	0.242	0.419	0.229	0.016
OTU1075	1.113	9.061	0.14405	0.384635	NotSig	Bacteria	Firmicutes	Clostridia	Clostridiales	Unassigned	Unassigned	0.066	0.032	0.091	0.063	0.067	0.014	0.115	0.01	0.193	0.037	0.059	0.006	0.059	0	0.01	0.007	0.036	0.02	0.026	0.03	0.015	0.12
OTU1495	-2.057	6.375	0.144058	0.384635	NotSig	Bacteria	Firmicutes	Clostridia	Clostridiales	Lachnospiraceae	Unassigned	0.002	0.007	0	0	0	0	0	0	0	0.008	0.007	0	0	0.027	0	0	0	0	0.009	0	0.027	0.002
OTU663	1.595	7.014	0.144312	0.384635	NotSig	Bacteria	Bacteroidetes	Bacteroidia	Bacteroidales	Porphyromonadaceae	Unassigned	0.011	0.004	0.005	0.007	0	0	0.009	0.005	0.077	0.002	0.002	0.002	0.002	0	0.002	0	0	0	0.003	0.017	0	0.014
OTU1713	1.947	5.771	0.145191	0.384635	NotSig	Bacteria	Firmicutes	Clostridia	Clostridiales	Ruminococcaceae	Unassigned	0.002	0	0	0.012	0	0	0	0	0.002	0	0.005	0	0	0	0	0	0	0	0	0	0	0.002
OTU742	-1.061	9.822	0.145843	0.384635	NotSig	Bacteria	Firmicutes	Clostridia	Clostridiales	Lachnospiraceae	Unassigned	0.06	0.112	0.124	0.017	0.128	0	0.057	0.076	0.015	0.118	0.042	0.024	0.045	0.127	0.189	0.016	0.075	0.061	0.199	0.045	0.319	0.045
OTU334	1.276	6.596	0.146579	0.384635	NotSig	Bacteria	Spirochaetes	Spirochaetia	Spirochaetales	Spirochaetaceae	Unassigned	0.007	0.003	0	0.007	0.011	0.03	0.004	0.003	0.006	0.004	0	0.002	0.005	0	0.002	0	0	0.003	0.003	0.006	0.002	0.007
OTU130	-1.485	7.232	0.146637	0.384635	NotSig	Bacteria	Firmicutes	Negativicutes	Selenomonadales	Veillonellaceae	Veillonella	0.006	0.014	0.041	0	0	0	0.004	0	0	0.002	0.017	0	0.002	0.005	0.02	0.002	0.008	0.018	0.003	0.011	0.075	0.002
OTU925	1.281	6.402	0.146856	0.384635	NotSig	Bacteria	Unassigned	Unassigned	Unassigned	Unassigned	Unassigned	0.006	0.002	0.005	0.01	0.004	0	0	0.013	0.013	0.002	0	0.01	0	0.002	0.002	0	0	0.005	0.003	0	0.002	0.007
OTU330	-2.107	6.583	0.147006	0.384635	NotSig	Bacteria	Unassigned	Unassigned	Unassigned	Unassigned	Unassigned	0.002	0.009	0	0	0	0	0	0	0	0.006	0	0.012	0	0.05	0	0	0	0.003	0.011	0.024	0	0
OTU1712	1.594	5.722	0.147231	0.384635	NotSig	Bacteria	Firmicutes	Clostridia	Clostridiales	Unassigned	Unassigned	0.001	0	0	0.002	0	0	0.004	0	0.002	0.006	0	0	0	0	0	0	0.003	0	0	0	0	0
OTU38	-1.314	12.46	0.14741	0.384635	NotSig	Bacteria	Bacteroidetes	Bacteroidia	Bacteroidales	Prevotellaceae	Unassigned	0.344	0.889	0.387	0.908	0.607	0.061	0.009	0.472	0.133	0.173	0.429	0.259	2.208	0.111	0.506	0.007	0.003	0.005	3.918	0.011	0.757	1.367
OTU1687	-1.136	7.134	0.147503	0.384635	NotSig	Bacteria	Firmicutes	Clostridia	Clostridiales	Unassigned	Unassigned	0.006	0.013	0.007	0	0.004	0	0.013	0.008	0.006	0.024	0	0.002	0.018	0.007	0	0.014	0.008	0.01	0.006	0.006	0.017	0.047
OTU769	1.925	5.78	0.147514	0.384635	NotSig	Bacteria	Actinobacteria	Actinobacteria	Actinomycetales	Micrococcaceae	Kocuria	0.002	0	0	0	0	0	0.013	0	0	0.002	0.005	0	0	0	0	0	0	0	0	0.002	0	0
OTU1420	1.295	7.131	0.147559	0.384635	NotSig	Bacteria	Firmicutes	Clostridia	Clostridiales	Lachnospiraceae	Unassigned	0.013	0.006	0	0.002	0.004	0.035	0.002	0.023	0.013	0.026	0.002	0.022	0.002	0.002	0	0.002	0.008	0.02	0.02	0	0	0.002
OTU392	1.181	11.176	0.147734	0.384635	NotSig	Bacteria	Bacteroidetes	Bacteroidia	Bacteroidales	Prevotellaceae	Prevotella	0.317	0.142	0.665	0.327	1.406	0	0.215	0.18	0.169	0.043	0.069	0.095	0.426	0.129	0.093	0.036	0.016	0.01	0.057	0.103	0.306	0.242
OTU1108	1.376	9.863	0.148088	0.384635	NotSig	Bacteria	Firmicutes	Clostridia	Clostridiales	Ruminococcaceae	Ruminococcus	0.106	0.049	0.002	0.034	0.002	0.827	0.005	0.081	0.011	0.071	0.017	0.01	0.009	0.016	0.034	0.002	0.049	0.056	0.122	0.009	0.177	0.016
OTU908	1.723	6.251	0.148792	0.384635	NotSig	Bacteria	Unassigned	Unassigned	Unassigned	Unassigned	Unassigned	0.005	0.001	0	0.015	0	0.002	0	0	0.008	0	0.005	0.02	0.009	0	0	0	0	0	0	0	0.002	0.002
OTU100	1.403	5.569	0.148969	0.384635	NotSig	Bacteria	Proteobacteria	Deltaproteobacteria	Desulfovibrionales	Desulfovibrionaceae	Unassigned	0	0	0	0	0.004	0	0	0	0	0	0	0	0	0	0	0	0	0	0	0	0	0
OTU1083	1.403	5.569	0.148969	0.384635	NotSig	Bacteria	Firmicutes	Clostridia	Clostridiales	Clostridiaceae_1	Clostridium_sensu_stricto	0	0	0	0	0.004	0	0	0	0	0	0	0	0	0	0	0	0	0	0	0	0	0
OTU1084	1.403	5.569	0.148969	0.384635	NotSig	Bacteria	Firmicutes	Clostridia	Clostridiales	Ruminococcaceae	Unassigned	0	0	0	0	0.004	0	0	0	0	0	0	0	0	0	0	0	0	0	0	0	0	0
OTU1247	1.403	5.569	0.148969	0.384635	NotSig	Bacteria	Firmicutes	Clostridia	Clostridiales	Ruminococcaceae	Unassigned	0	0	0	0	0.004	0	0	0	0	0	0	0	0	0	0	0	0	0	0	0	0	0
OTU1737	1.403	5.569	0.148969	0.384635	NotSig	Bacteria	Firmicutes	Clostridia	Clostridiales	Lachnospiraceae	Unassigned	0	0	0	0	0.004	0	0	0	0	0	0	0	0	0	0	0	0	0	0	0	0	0
OTU318	1.403	5.569	0.148969	0.384635	NotSig	Bacteria	Proteobacteria	Deltaproteobacteria	Desulfovibrionales	Desulfovibrionaceae	Desulfovibrio	0	0	0	0	0.004	0	0	0	0	0	0	0	0	0	0	0	0	0	0	0	0	0
OTU319	1.403	5.569	0.148969	0.384635	NotSig	Bacteria	Unassigned	Unassigned	Unassigned	Unassigned	Unassigned	0	0	0	0	0.004	0	0	0	0	0	0	0	0	0	0	0	0	0	0	0	0	0
OTU323	1.403	5.569	0.148969	0.384635	NotSig	Bacteria	Proteobacteria	Betaproteobacteria	Rhodocyclales	Rhodocyclaceae	Zoogloea	0	0	0	0	0.004	0	0	0	0	0	0	0	0	0	0	0	0	0	0	0	0	0
OTU616	1.403	5.569	0.148969	0.384635	NotSig	Bacteria	Bacteroidetes	Sphingobacteriia	Sphingobacteriales	Chitinophagaceae	Unassigned	0	0	0	0	0.004	0	0	0	0	0	0	0	0	0	0	0	0	0	0	0	0	0
OTU619	1.403	5.569	0.148969	0.384635	NotSig	Bacteria	Bacteroidetes	Flavobacteriia	Flavobacteriales	Flavobacteriaceae	Chryseobacterium	0	0	0	0	0.004	0	0	0	0	0	0	0	0	0	0	0	0	0	0	0	0	0
OTU620	1.403	5.569	0.148969	0.384635	NotSig	Bacteria	Bacteroidetes	Bacteroidia	Bacteroidales	Porphyromonadaceae	Paludibacter	0	0	0	0	0.004	0	0	0	0	0	0	0	0	0	0	0	0	0	0	0	0	0
OTU67	1.403	5.569	0.148969	0.384635	NotSig	Bacteria	Unassigned	Unassigned	Unassigned	Unassigned	Unassigned	0	0	0	0	0.004	0	0	0	0	0	0	0	0	0	0	0	0	0	0	0	0	0
OTU1670	1.397	5.568	0.149668	0.385869	NotSig	Bacteria	Firmicutes	Clostridia	Clostridiales	Lachnospiraceae	Unassigned	0	0	0	0	0	0	0	0	0.004	0	0	0	0	0	0	0	0	0	0	0	0	0
OTU1528	-2.507	6.035	0.150788	0.38764	NotSig	Bacteria	Firmicutes	Clostridia	Clostridiales	Ruminococcaceae	Clostridium_IV	0	0.004	0.005	0	0	0	0	0	0	0	0	0	0.014	0	0	0	0	0	0	0	0	0.028
OTU104	-1.333	9.157	0.150798	0.38764	NotSig	Bacteria	Firmicutes	Erysipelotrichia	Erysipelotrichales	Erysipelotrichaceae	Turicibacter	0.03	0.067	0.062	0.015	0.025	0	0.007	0.01	0.073	0.067	0.002	0.036	0.009	0.018	0.007	0.002	0.01	0.025	0.017	0.536	0.03	0.012
OTU1499	1.321	5.994	0.151186	0.387883	NotSig	Bacteria	Firmicutes	Clostridia	Clostridiales	Ruminococcaceae	Unassigned	0.003	0.001	0.002	0.01	0	0.002	0.007	0	0.002	0.002	0.005	0	0.002	0	0	0	0	0	0.006	0.002	0	0
OTU56	1.001	7.577	0.151336	0.387883	NotSig	Bacteria	Firmicutes	Unassigned	Unassigned	Unassigned	Unassigned	0.021	0.009	0.036	0.019	0.004	0.007	0.041	0.005	0.011	0.016	0.037	0.034	0.016	0	0.007	0.007	0.01	0.008	0	0.017	0.01	0.016
OTU114	-1.03	7.97	0.151624	0.387902	NotSig	Bacteria	Firmicutes	Clostridia	Clostridiales	Peptococcaceae_1	Peptococcus	0.015	0.026	0.012	0.012	0.004	0.005	0.009	0.018	0.009	0.043	0.03	0.006	0.007	0.07	0.017	0.005	0.013	0.008	0.014	0.098	0.022	0.009
OTU230	-1.655	5.69	0.151788	0.387902	NotSig	Bacteria	Proteobacteria	Betaproteobacteria	Burkholderiales	Sutterellaceae	Sutterella	0	0.001	0	0	0	0	0.002	0	0	0	0	0	0	0.005	0	0	0.005	0.003	0	0	0	0
OTU1444	1.144	6.862	0.152748	0.389787	NotSig	Bacteria	Firmicutes	Clostridia	Clostridiales	Ruminococcaceae	Unassigned	0.01	0.004	0.005	0.007	0.004	0.021	0.005	0.003	0.009	0.026	0.007	0.01	0.002	0	0.002	0	0	0.003	0.009	0.011	0.015	0
OTU1105	-1.147	8.886	0.153646	0.391507	NotSig	Bacteria	Firmicutes	Clostridia	Clostridiales	Ruminococcaceae	Butyricicoccus	0.029	0.056	0.017	0.08	0.029	0	0.013	0.015	0.004	0.043	0.047	0.046	0.027	0.029	0.061	0.007	0.003	0.023	0.037	0.026	0.321	0.021
OTU819	1.025	7.645	0.154368	0.391693	NotSig	Bacteria	Unassigned	Unassigned	Unassigned	Unassigned	Unassigned	0.023	0.01	0.012	0	0.004	0.009	0.05	0.025	0.015	0.075	0.032	0.006	0.025	0.005	0.005	0.007	0.005	0.003	0.014	0.011	0.007	0.021
OTU1736	1.357	5.564	0.154487	0.391693	NotSig	Bacteria	Firmicutes	Clostridia	Clostridiales	Clostridiales_Incertae_Sedis_XI	Helcococcus	0	0	0	0.002	0.002	0	0	0	0	0	0	0	0	0	0	0	0	0	0	0	0	0
OTU572	1.357	5.564	0.154487	0.391693	NotSig	Bacteria	Bacteroidetes	Bacteroidia	Bacteroidales	Prevotellaceae	Prevotella	0	0	0	0.002	0.002	0	0	0	0	0	0	0	0	0	0	0	0	0	0	0	0	0
OTU102	1.354	5.563	0.154711	0.391693	NotSig	Bacteria	Proteobacteria	Gammaproteobacteria	Pseudomonadales	Moraxellaceae	Moraxella	0.001	0	0	0	0	0	0	0.005	0	0	0	0	0	0	0	0	0	0	0	0	0	0
OTU1585	1.354	5.563	0.15484	0.391693	NotSig	Bacteria	Proteobacteria	Unassigned	Unassigned	Unassigned	Unassigned	0	0	0	0.002	0	0	0	0	0.002	0	0	0	0	0	0	0	0	0	0	0	0	0
OTU362	1.356	5.565	0.155692	0.392713	NotSig	Bacteria	Actinobacteria	Actinobacteria	Actinomycetales	Corynebacteriaceae	Corynebacterium	0	0	0	0	0	0.002	0	0	0	0.002	0	0	0	0	0	0	0	0	0	0	0	0
OTU777	1.356	5.565	0.155692	0.392713	NotSig	Bacteria	Actinobacteria	Actinobacteria	Actinomycetales	Microbacteriaceae	Unassigned	0	0	0	0	0	0.002	0	0	0	0.002	0	0	0	0	0	0	0	0	0	0	0	0
OTU98	-2.486	6.722	0.156079	0.392884	NotSig	Bacteria	Spirochaetes	Spirochaetia	Spirochaetales	Spirochaetaceae	Treponema	0.002	0.008	0	0	0.004	0	0	0	0	0.014	0	0	0	0	0.054	0	0	0	0	0.03	0	0
OTU1324	-1.603	5.928	0.15621	0.392884	NotSig	Bacteria	Firmicutes	Clostridia	Clostridiales	Unassigned	Unassigned	0.001	0.002	0	0.002	0	0	0	0	0.002	0	0.002	0	0	0.009	0	0.005	0.008	0	0	0	0.002	0
OTU1622	1.344	5.564	0.157344	0.394686	NotSig	Bacteria	Firmicutes	Clostridia	Clostridiales	Ruminococcaceae	Unassigned	0	0	0	0	0	0.002	0.002	0	0	0	0	0	0	0	0	0	0	0	0	0	0	0
OTU800	1.333	5.561	0.157378	0.394686	NotSig	Bacteria	Firmicutes	Unassigned	Unassigned	Unassigned	Unassigned	0	0	0	0.002	0	0	0	0.003	0	0	0	0	0	0	0	0	0	0	0	0	0	0
OTU500	1.329	5.561	0.1578	0.395179	NotSig	Bacteria	Bacteroidetes	Bacteroidia	Bacteroidales	Porphyromonadaceae	Unassigned	0.001	0	0	0	0	0	0	0.003	0	0	0.002	0	0	0	0	0	0	0	0	0	0	0
OTU35	-1.304	12.331	0.158856	0.396149	NotSig	Bacteria	Bacteroidetes	Bacteroidia	Bacteroidales	Prevotellaceae	Prevotella	0.336	0.646	0.033	0.019	0.038	0.101	1.052	1.126	0.008	0.004	0.976	0.002	0.765	1.127	0.057	1.882	1.135	0.48	0.08	0.015	0.521	0.394
OTU234	1.844	5.751	0.159297	0.396149	NotSig	Bacteria	Unassigned	Unassigned	Unassigned	Unassigned	Unassigned	0.002	0	0	0	0	0	0	0.01	0.002	0	0	0.004	0	0.002	0	0	0	0	0	0	0	0
OTU1241	1.311	5.558	0.160057	0.396149	NotSig	Bacteria	Firmicutes	Clostridia	Clostridiales	Unassigned	Unassigned	0	0	0	0.005	0	0	0	0	0	0	0	0	0	0	0	0	0	0	0	0	0	0
OTU316	1.311	5.558	0.160057	0.396149	NotSig	Bacteria	Proteobacteria	Betaproteobacteria	Burkholderiales	Sutterellaceae	Parasutterella	0	0	0	0.005	0	0	0	0	0	0	0	0	0	0	0	0	0	0	0	0	0	0
OTU1623	1.311	5.558	0.16007	0.396149	NotSig	Bacteria	Firmicutes	Clostridia	Clostridiales	Ruminococcaceae	Clostridium_IV	0	0	0.002	0.002	0	0	0	0	0	0	0	0	0	0	0	0	0	0	0	0	0	0
OTU1665	1.308	5.558	0.160442	0.396149	NotSig	Bacteria	Firmicutes	Clostridia	Clostridiales	Unassigned	Unassigned	0	0	0	0.002	0	0	0	0	0	0	0	0.002	0	0	0	0	0	0	0	0	0	0
OTU297	1.308	5.558	0.160442	0.396149	NotSig	Bacteria	Firmicutes	Bacilli	Lactobacillales	Lactobacillaceae	Lactobacillus	0	0	0	0.002	0	0	0	0	0	0	0	0.002	0	0	0	0	0	0	0	0	0	0
OTU452	1.305	5.558	0.160827	0.396149	NotSig	Bacteria	Bacteroidetes	Bacteroidia	Bacteroidales	Prevotellaceae	Prevotella	0	0	0	0	0	0	0	0	0	0	0	0.004	0	0	0	0	0	0	0	0	0	0
OTU312	1.305	5.558	0.160867	0.396149	NotSig	Bacteria	Firmicutes	Bacilli	Lactobacillales	Lactobacillaceae	Lactobacillus	0	0	0	0	0	0	0	0	0	0	0.002	0.002	0	0	0	0	0	0	0	0	0	0
OTU1092	1.305	5.558	0.160907	0.396149	NotSig	Bacteria	Firmicutes	Clostridia	Clostridiales	Unassigned	Unassigned	0	0	0	0	0	0	0	0	0	0	0.005	0	0	0	0	0	0	0	0	0	0	0
OTU1671	1.305	5.558	0.160907	0.396149	NotSig	Bacteria	Firmicutes	Clostridia	Clostridiales	Clostridiaceae_1	Clostridium_sensu_stricto	0	0	0	0	0	0	0	0	0	0	0.005	0	0	0	0	0	0	0	0	0	0	0
OTU1672	1.305	5.558	0.160907	0.396149	NotSig	Bacteria	Firmicutes	Clostridia	Clostridiales	Unassigned	Unassigned	0	0	0	0	0	0	0	0	0	0	0.005	0	0	0	0	0	0	0	0	0	0	0
OTU1163	1.626	5.732	0.161602	0.397032	NotSig	Bacteria	Firmicutes	Clostridia	Clostridiales	Ruminococcaceae	Unassigned	0.001	0	0	0.007	0	0.002	0	0.003	0.002	0	0	0	0	0	0	0	0	0	0.003	0	0	0
OTU1524	2.445	5.934	0.16172	0.397032	NotSig	Bacteria	Proteobacteria	Alphaproteobacteria	Unassigned	Unassigned	Unassigned	0.003	0	0	0	0	0	0	0.003	0	0	0.032	0	0	0	0.002	0	0	0	0	0	0	0
OTU1042	1.3	5.558	0.162013	0.397192	NotSig	Bacteria	Firmicutes	Unassigned	Unassigned	Unassigned	Unassigned	0	0	0	0	0	0	0	0	0.002	0.002	0	0	0	0	0	0	0	0	0	0	0	0
OTU1369	-1.416	10.536	0.16264	0.397559	NotSig	Bacteria	Firmicutes	Clostridia	Clostridiales	Lachnospiraceae	Unassigned	0.089	0.229	0.318	0.034	0.022	0	0.005	0.284	0.008	0.039	0.097	0.078	0.016	0.011	0.002	0.005	0.441	0.777	0.992	0.009	0	0.04
OTU738	-0.992	13.435	0.162885	0.397559	NotSig	Bacteria	Firmicutes	Clostridia	Clostridiales	Lachnospiraceae	Unassigned	0.835	1.348	0.6	1.029	0.299	0.089	0.739	0.746	0.43	0.664	3.442	0.312	0.129	1.207	3.037	0.681	2.252	2.409	0.95	0.184	2.466	0.167
OTU1654	-1.816	6.066	0.163032	0.397559	NotSig	Bacteria	Firmicutes	Clostridia	Clostridiales	Lachnospiraceae	Unassigned	0.001	0.004	0	0	0	0	0	0	0	0	0.002	0.006	0	0	0.01	0	0	0	0.014	0.004	0	0.007
OTU851	1.65	6.325	0.163072	0.397559	NotSig	Bacteria	Firmicutes	Clostridia	Clostridiales	Unassigned	Unassigned	0.006	0.002	0	0.01	0	0	0.029	0	0.002	0	0.005	0.014	0.005	0	0	0	0	0	0.006	0	0	0.007
OTU1542	-2.146	6.167	0.163449	0.397924	NotSig	Bacteria	Firmicutes	Clostridia	Clostridiales	Lachnospiraceae	Unassigned	0.001	0.004	0	0	0	0	0.002	0.008	0	0	0	0	0	0	0.027	0.005	0	0	0	0	0	0.005
OTU1255	-1.247	8.863	0.163806	0.398007	NotSig	Bacteria	Firmicutes	Clostridia	Clostridiales	Unassigned	Unassigned	0.027	0.065	0	0.015	0.009	0.007	0.018	0.112	0.013	0.03	0.012	0.05	0.222	0.032	0.049	0	0.008	0.01	0.057	0.015	0	0.261
OTU636	-1.302	7.942	0.163939	0.398007	NotSig	Bacteria	Bacteroidetes	Bacteroidia	Bacteroidales	Prevotellaceae	Unassigned	0.012	0.033	0.045	0.017	0.004	0.016	0	0.008	0.011	0.01	0.005	0.002	0.254	0.007	0.005	0.002	0.005	0	0.011	0.002	0.002	0.045
OTU901	1.061	6.199	0.164194	0.398073	NotSig	Bacteria	Firmicutes	Clostridia	Clostridiales	Ruminococcaceae	Unassigned	0.004	0.002	0	0.007	0.002	0.002	0.004	0.008	0.002	0.006	0.007	0.004	0.002	0	0.002	0	0.003	0.003	0	0.006	0	0
OTU1028	1.267	5.554	0.166263	0.402084	NotSig	Bacteria	Unassigned	Unassigned	Unassigned	Unassigned	Unassigned	0	0	0	0	0	0	0.002	0.003	0	0	0	0	0	0	0	0	0	0	0	0	0	0
OTU107	-1.437	8.15	0.166308	0.402084	NotSig	Bacteria	Firmicutes	Bacilli	Lactobacillales	Lactobacillaceae	Lactobacillus	0.015	0.03	0.012	0.077	0	0	0.002	0.008	0.006	0.002	0.035	0.006	0.005	0	0.133	0	0.008	0.003	0.034	0.009	0.112	0.002
OTU1395	1.154	7.514	0.167103	0.403368	NotSig	Bacteria	Firmicutes	Clostridia	Clostridiales	Unassigned	Unassigned	0.018	0.009	0.007	0.022	0.004	0	0.007	0.036	0.073	0.028	0.002	0.004	0.011	0.02	0	0.007	0	0.003	0.014	0.004	0.012	0.014
OTU1584	1.257	5.553	0.167301	0.403368	NotSig	Bacteria	Proteobacteria	Alphaproteobacteria	Rhodospirillales	Rhodospirillaceae	Unassigned	0	0	0	0.002	0	0	0	0	0	0.002	0	0	0	0	0	0	0	0	0	0	0	0
OTU15	-0.941	12.906	0.167765	0.403931	NotSig	Bacteria	Unassigned	Unassigned	Unassigned	Unassigned	Unassigned	0.53	0.938	0.796	0.266	1.119	0.728	0.197	0.076	0.163	0.203	1.294	0.457	0.43	0.847	0.58	0.679	0.783	1.12	0.136	0.786	3.316	0.7
OTU1080	1.245	5.552	0.168989	0.404574	NotSig	Bacteria	Firmicutes	Clostridia	Clostridiales	Unassigned	Unassigned	0	0	0	0.002	0	0	0.002	0	0	0	0	0	0	0	0	0	0	0	0	0	0	0
OTU1245	1.245	5.552	0.168989	0.404574	NotSig	Bacteria	Firmicutes	Clostridia	Clostridiales	Ruminococcaceae	Unassigned	0	0	0	0.002	0	0	0.002	0	0	0	0	0	0	0	0	0	0	0	0	0	0	0
OTU1594	1.245	5.552	0.168989	0.404574	NotSig	Bacteria	Firmicutes	Clostridia	Clostridiales	Eubacteriaceae	Anaerofustis	0	0	0	0.002	0	0	0.002	0	0	0	0	0	0	0	0	0	0	0	0	0	0	0
OTU1621	1.245	5.552	0.169002	0.404574	NotSig	Bacteria	Firmicutes	Clostridia	Clostridiales	Ruminococcaceae	Clostridium_IV	0	0	0.002	0	0	0	0.002	0	0	0	0	0	0	0	0	0	0	0	0	0	0	0
OTU1073	0.991	9.532	0.169214	0.404574	NotSig	Bacteria	Firmicutes	Clostridia	Clostridiales	Ruminococcaceae	Oscillibacter	0.093	0.05	0.184	0.097	0.126	0.124	0.007	0.051	0.049	0.091	0.025	0.175	0.145	0.009	0.034	0.002	0.039	0.025	0.094	0.013	0.015	0.127
OTU1658	1.241	5.551	0.169421	0.404574	NotSig	Bacteria	Firmicutes	Clostridia	Clostridiales	Ruminococcaceae	Unassigned	0	0	0	0	0	0	0.002	0	0	0	0.002	0	0	0	0	0	0	0	0	0	0	0
OTU967	1.229	8.844	0.170147	0.405552	NotSig	Bacteria	Firmicutes	Clostridia	Clostridiales	Unassigned	Unassigned	0.059	0.024	0.022	0.041	0.038	0.005	0.02	0.005	0.032	0.091	0	0.338	0.045	0.002	0.032	0	0.029	0.036	0	0.028	0.03	0.042
OTU30	-1.005	12.96	0.170295	0.405552	NotSig	Bacteria	Bacteroidetes	Bacteroidia	Bacteroidales	Prevotellaceae	Prevotella	0.592	1.115	0.744	0.126	0.2	0.295	0.133	0.794	0.081	2.988	0.305	0.257	1.359	0.556	0.506	0.284	1.306	1.61	2.951	0.009	1.136	1.435
OTU1560	1.513	6.857	0.17166	0.408248	NotSig	Bacteria	Firmicutes	Clostridia	Clostridiales	Lachnospiraceae	Clostridium_XlVa	0.011	0.004	0.05	0.007	0.038	0	0.002	0	0.002	0.006	0	0.006	0.002	0	0	0	0	0	0.009	0.015	0	0.009
OTU1530	1.518	5.865	0.172381	0.409256	NotSig	Bacteria	Firmicutes	Clostridia	Clostridiales	Ruminococcaceae	Unassigned	0.002	0	0	0.002	0.002	0.002	0.013	0	0	0.002	0	0	0	0	0	0.002	0.003	0	0	0	0	0
OTU1152	-1.707	5.821	0.172553	0.409256	NotSig	Bacteria	Firmicutes	Clostridia	Clostridiales	Unassigned	Unassigned	0	0.002	0	0	0	0	0.002	0.003	0	0	0	0	0.009	0	0.007	0	0	0	0	0	0	0.002
OTU1676	1.251	8.791	0.174278	0.412788	NotSig	Bacteria	Actinobacteria	Actinobacteria	Coriobacteriales	Coriobacteriaceae	Unassigned	0.061	0.024	0.067	0.039	0.031	0	0.109	0.053	0.049	0.162	0.025	0.074	0.054	0.016	0	0	0	0.003	0.017	0.092	0	0.056
OTU1091	1.202	5.547	0.174651	0.413054	NotSig	Bacteria	Unassigned	Unassigned	Unassigned	Unassigned	Unassigned	0	0	0	0	0	0	0	0	0	0.004	0	0	0	0	0	0	0	0	0	0	0	0
OTU548	-1.386	6.051	0.175003	0.413054	NotSig	Bacteria	Bacteroidetes	Bacteroidia	Bacteroidales	Prevotellaceae	Prevotella	0.001	0.003	0.002	0.005	0.002	0	0	0	0	0	0	0.002	0.014	0.007	0.007	0	0	0	0	0	0.002	0.002
OTU147	-1.555	7.249	0.175233	0.413054	NotSig	Bacteria	Proteobacteria	Gammaproteobacteria	Pasteurellales	Pasteurellaceae	Unassigned	0.006	0.015	0.002	0.002	0	0	0.002	0.036	0	0.012	0.007	0	0	0	0.002	0	0.003	0.013	0.011	0.028	0.095	0
OTU1104	1.077	7.826	0.175335	0.413054	NotSig	Bacteria	Firmicutes	Clostridia	Clostridiales	Unassigned	Unassigned	0.024	0.013	0.026	0.012	0.031	0.026	0.054	0.008	0.047	0.03	0.01	0	0.025	0.007	0	0.002	0	0.008	0.045	0.011	0.005	0.023
OTU740	1.016	10.732	0.175917	0.413866	NotSig	Bacteria	Firmicutes	Clostridia	Clostridiales	Unassigned	Unassigned	0.243	0.11	0.014	0.123	0.004	0.122	1.497	0.223	0.122	0.203	0.072	0.048	0.161	0.219	0.027	0.075	0.054	0.091	0.051	0.122	0.09	0.211
OTU1418	-1.251	6.154	0.176624	0.414971	NotSig	Bacteria	Firmicutes	Clostridia	Clostridiales	Lachnospiraceae	Lachnospiracea_incertae_sedis	0.002	0.004	0	0.01	0.002	0	0	0	0	0.002	0.002	0	0.002	0.005	0	0	0.003	0.013	0.009	0.006	0.002	0
OTU268	-1.572	5.695	0.177887	0.41506	NotSig	Bacteria	Proteobacteria	Gammaproteobacteria	Pasteurellales	Pasteurellaceae	Actinobacillus	0	0.001	0	0	0	0	0	0	0	0	0	0.002	0.007	0	0.002	0	0	0	0	0	0.002	0
OTU101	1.178	5.545	0.178087	0.41506	NotSig	Bacteria	Firmicutes	Bacilli	Bacillales	Bacillaceae_2	Unassigned	0	0	0	0	0	0	0.004	0	0	0	0	0	0	0	0	0	0	0	0	0	0	0
OTU1043	1.178	5.545	0.178087	0.41506	NotSig	Bacteria	Unassigned	Unassigned	Unassigned	Unassigned	Unassigned	0	0	0	0	0	0	0.004	0	0	0	0	0	0	0	0	0	0	0	0	0	0	0
OTU1086	1.178	5.545	0.178087	0.41506	NotSig	Bacteria	Firmicutes	Clostridia	Clostridiales	Ruminococcaceae	Unassigned	0	0	0	0	0	0	0.004	0	0	0	0	0	0	0	0	0	0	0	0	0	0	0
OTU1088	1.178	5.545	0.178087	0.41506	NotSig	Bacteria	Firmicutes	Clostridia	Clostridiales	Ruminococcaceae	Unassigned	0	0	0	0	0	0	0.004	0	0	0	0	0	0	0	0	0	0	0	0	0	0	0
OTU1249	1.178	5.545	0.178087	0.41506	NotSig	Bacteria	Firmicutes	Clostridia	Clostridiales	Unassigned	Unassigned	0	0	0	0	0	0	0.004	0	0	0	0	0	0	0	0	0	0	0	0	0	0	0
OTU1697	1.442	5.928	0.17864	0.415797	NotSig	Bacteria	Firmicutes	Clostridia	Clostridiales	Ruminococcaceae	Unassigned	0.002	0.001	0.012	0	0.004	0.002	0	0	0.002	0	0	0.004	0.002	0	0	0	0.003	0	0	0.002	0	0
OTU1232	0.928	7.183	0.17934	0.41687	NotSig	Bacteria	Firmicutes	Clostridia	Clostridiales	Ruminococcaceae	Unassigned	0.014	0.007	0.01	0.031	0.004	0.012	0.023	0.003	0.009	0.024	0.007	0.016	0.007	0	0.002	0	0.021	0.005	0.009	0.009	0.007	0.009
OTU487	-1.984	6.366	0.180515	0.419044	NotSig	Bacteria	Bacteroidetes	Bacteroidia	Bacteroidales	Bacteroidaceae	Bacteroides	0.001	0.005	0	0	0.002	0.009	0	0	0	0	0	0	0	0.005	0	0.03	0	0.008	0	0	0.005	0
OTU892	1.312	5.996	0.180972	0.419548	NotSig	Bacteria	Firmicutes	Unassigned	Unassigned	Unassigned	Unassigned	0.003	0.001	0	0.005	0	0.012	0.002	0	0.002	0.002	0	0.004	0.002	0	0	0	0	0.003	0	0.002	0	0.002
OTU416	-1.179	8.136	0.18192	0.421187	NotSig	Bacteria	Bacteroidetes	Unassigned	Unassigned	Unassigned	Unassigned	0.015	0.034	0.012	0.051	0.013	0.021	0.02	0.003	0	0.018	0.017	0	0.118	0.075	0.015	0.016	0	0	0.003	0.036	0.052	0.021
OTU1408	1.099	6.934	0.182419	0.421785	NotSig	Bacteria	Unassigned	Unassigned	Unassigned	Unassigned	Unassigned	0.012	0.005	0.012	0.015	0	0	0.039	0.003	0.004	0.018	0.005	0.022	0.011	0.007	0	0.002	0	0	0.014	0.006	0.002	0.007
OTU991	-1.826	5.734	0.18451	0.42593	NotSig	Bacteria	Firmicutes	Clostridia	Clostridiales	Unassigned	Unassigned	0	0.002	0	0.002	0	0	0	0	0	0	0	0	0.007	0	0	0	0	0	0	0	0	0.009
OTU1115	1.154	7.277	0.184752	0.42593	NotSig	Bacteria	Unassigned	Unassigned	Unassigned	Unassigned	Unassigned	0.015	0.007	0.014	0	0.007	0.009	0.009	0	0.041	0.006	0.059	0.006	0.016	0	0.005	0.002	0	0.003	0.023	0.013	0.002	0.005
OTU1491	1.084	6.225	0.185011	0.42593	NotSig	Bacteria	Firmicutes	Clostridia	Clostridiales	Lachnospiraceae	Unassigned	0.004	0.002	0.007	0	0.004	0.002	0.005	0.005	0.006	0.004	0	0.008	0.007	0.005	0	0	0	0	0.006	0.002	0	0
OTU1221	-0.953	7.709	0.185187	0.42593	NotSig	Bacteria	Firmicutes	Clostridia	Clostridiales	Lachnospiraceae	Unassigned	0.013	0.022	0.005	0.031	0	0	0.007	0.013	0.002	0.028	0.03	0.012	0.011	0.025	0.002	0.007	0.039	0.033	0.028	0.015	0.027	0.035
OTU1162	1.356	5.693	0.186062	0.427008	NotSig	Bacteria	Firmicutes	Clostridia	Clostridiales	Unassigned	Unassigned	0.001	0	0	0.002	0	0.002	0	0.003	0	0.002	0.002	0	0	0	0	0	0	0	0.003	0	0	0
OTU929	1.622	5.715	0.186144	0.427008	NotSig	Bacteria	Firmicutes	Clostridia	Clostridiales	Ruminococcaceae	Unassigned	0.001	0	0	0.002	0	0	0.007	0	0	0	0	0.004	0	0	0	0	0	0	0	0	0	0.002
OTU827	1.271	7.193	0.18773	0.430082	NotSig	Bacteria	Firmicutes	Clostridia	Clostridiales	Unassigned	Unassigned	0.014	0.006	0.012	0.015	0.004	0.005	0.004	0	0.026	0.008	0	0.066	0.014	0	0	0	0	0.003	0.003	0.015	0.002	0.023
OTU1114	0.894	8.007	0.188201	0.430597	NotSig	Bacteria	Firmicutes	Clostridia	Clostridiales	Ruminococcaceae	Oscillibacter	0.029	0.014	0.091	0.029	0.036	0.009	0.014	0.015	0.026	0.016	0.012	0.038	0.011	0	0.017	0.005	0.021	0.018	0.014	0.028	0.015	0.012
OTU255	1.026	12.192	0.188585	0.43064	NotSig	Bacteria	Firmicutes	Erysipelotrichia	Erysipelotrichales	Erysipelotrichaceae	Catenibacterium	0.603	0.282	0.677	0.392	0.344	2.295	0.097	0.289	0.008	0.227	1.678	0.026	0.14	0.21	0.057	0.352	0.365	0.259	0.037	0.397	0.608	0.399
OTU872	1.731	7.229	0.188815	0.43064	NotSig	Bacteria	Firmicutes	Clostridia	Clostridiales	Unassigned	Unassigned	0.016	0.005	0	0.044	0	0.068	0.002	0	0.004	0	0.04	0	0	0	0.002	0	0.029	0.008	0	0	0	0.009
OTU1121	-1.061	6.748	0.18896	0.43064	NotSig	Bacteria	Firmicutes	Clostridia	Clostridiales	Clostridiales_Incertae_Sedis_XIII	Mogibacterium	0.004	0.009	0.002	0.002	0.002	0	0.009	0.01	0.006	0.008	0.002	0	0.005	0.009	0	0	0	0.01	0.006	0.019	0.012	0.026
OTU1111	1.57	7.959	0.189637	0.431623	NotSig	Bacteria	Unassigned	Unassigned	Unassigned	Unassigned	Unassigned	0.034	0.011	0.115	0.01	0.036	0	0.029	0.132	0.011	0.002	0.002	0	0.057	0	0	0	0	0	0	0.017	0	0.038
OTU1357	-1.344	8.228	0.190338	0.432655	NotSig	Bacteria	Firmicutes	Clostridia	Clostridiales	Unassigned	Unassigned	0.017	0.039	0.002	0.019	0.002	0	0.011	0.033	0	0	0.102	0	0.018	0.136	0.012	0	0.029	0.025	0.065	0	0.087	0.014
OTU717	0.782	14.774	0.190671	0.432847	NotSig	Bacteria	Firmicutes	Clostridia	Clostridiales	Ruminococcaceae	Unassigned	3.437	2.055	3.862	1.726	1.535	8.066	4.995	2.851	3.904	4.09	1.586	1.752	3.218	2.483	1.565	1.287	2.879	1.714	2.761	1.004	1.831	1.803
OTU1728	1.226	6.775	0.19188	0.435027	NotSig	Bacteria	Firmicutes	Clostridia	Clostridiales	Ruminococcaceae	Unassigned	0.01	0.003	0.007	0.056	0.009	0	0.002	0.003	0.002	0.006	0	0.016	0.011	0	0	0.009	0.003	0.003	0	0.004	0	0.005
OTU1588	-1.293	6.172	0.192142	0.435058	NotSig	Bacteria	Firmicutes	Clostridia	Clostridiales	Lachnospiraceae	Unassigned	0.002	0.004	0	0.002	0	0	0	0.003	0	0	0.005	0.006	0	0	0.007	0	0	0.003	0.011	0.004	0.002	0.012
OTU408	1.203	9.942	0.193292	0.437096	NotSig	Bacteria	Bacteroidetes	Bacteroidia	Bacteroidales	Porphyromonadaceae	Unassigned	0.14	0.063	0.098	0.259	0.164	0.002	0.319	0.19	0.135	0.211	0	0.024	0.356	0.023	0.007	0.002	0	0	0.065	0.075	0.027	0.075
OTU720	-0.962	12.975	0.193735	0.43753	NotSig	Bacteria	Firmicutes	Clostridia	Clostridiales	Lachnospiraceae	Clostridium_XlVa	0.615	1.08	1.126	2.45	0.368	0.035	0.547	0.764	0.056	0.286	0.295	0.225	0.487	0.89	1.941	0.109	1.065	1.153	4.373	0.128	0.169	0.486
OTU1298	-1.404	6.292	0.195256	0.440396	NotSig	Bacteria	Unassigned	Unassigned	Unassigned	Unassigned	Unassigned	0.002	0.005	0	0	0	0	0.009	0.003	0.002	0	0.005	0	0	0	0.02	0	0.003	0.003	0.014	0.002	0.005	0
OTU1509	-1.173	6.562	0.195841	0.440749	NotSig	Bacteria	Firmicutes	Clostridia	Clostridiales	Ruminococcaceae	Faecalibacterium	0.003	0.007	0	0.002	0.002	0	0.013	0	0.006	0	0.002	0.004	0.002	0	0.012	0	0.021	0.01	0.009	0	0.01	0.005
OTU747	1.78	5.898	0.195916	0.440749	NotSig	Bacteria	Actinobacteria	Actinobacteria	Actinomycetales	Corynebacteriaceae	Corynebacterium	0.003	0.001	0	0	0	0	0.02	0	0	0	0.002	0.004	0	0	0	0	0.003	0.003	0	0	0	0
OTU1480	-1.198	6.358	0.197253	0.443186	NotSig	Bacteria	Firmicutes	Clostridia	Clostridiales	Ruminococcaceae	Unassigned	0.002	0.005	0.005	0.002	0	0	0	0	0.006	0	0	0.008	0.002	0.009	0.002	0	0.005	0.003	0.011	0.017	0	0.002
OTU947	1.277	5.924	0.197847	0.443949	NotSig	Bacteria	Firmicutes	Clostridia	Clostridiales	Unassigned	Unassigned	0.003	0.001	0.005	0.012	0.002	0	0	0.003	0	0.002	0.002	0	0	0	0	0.002	0.003	0.003	0	0	0	0
OTU468	1.461	7.962	0.19815	0.444059	NotSig	Bacteria	Bacteroidetes	Bacteroidia	Bacteroidales	Porphyromonadaceae	Parabacteroides	0.033	0.012	0.033	0.165	0.047	0	0	0.018	0.017	0.02	0	0.026	0.059	0	0	0	0	0	0.017	0.019	0	0.023
OTU625	1.149	9.906	0.199023	0.445444	NotSig	Bacteria	Bacteroidetes	Bacteroidia	Bacteroidales	Prevotellaceae	Prevotella	0.132	0.062	0.344	0.203	0.236	0	0.099	0.003	0.167	0.211	0.005	0.048	0.224	0.029	0.005	0	0.031	0.005	0.034	0.088	0.017	0.183
OTU758	2.03	7.644	0.19938	0.445618	NotSig	Bacteria	Actinobacteria	Actinobacteria	Coriobacteriales	Coriobacteriaceae	Olsenella	0.03	0.005	0	0	0	0	0	0.003	0	0.002	0.278	0.018	0.005	0	0	0.03	0	0	0.011	0	0	0
OTU810	-1.268	9.381	0.199652	0.445618	NotSig	Bacteria	Proteobacteria	Gammaproteobacteria	Aeromonadales	Succinivibrionaceae	Succinivibrio	0.036	0.075	0	0.002	0.007	0.133	0.03	0.02	0.004	0.037	0.114	0.008	0.007	0.102	0.43	0	0.137	0.036	0.011	0.006	0.02	0.002
OTU1185	-0.857	9.099	0.199865	0.445618	NotSig	Bacteria	Firmicutes	Clostridia	Clostridiales	Lachnospiraceae	Unassigned	0.038	0.06	0.029	0.104	0.038	0.009	0.013	0.015	0.036	0.055	0.064	0.02	0.016	0.029	0.108	0.054	0.109	0.112	0.074	0.021	0.062	0.014
OTU413	-0.878	10.238	0.201591	0.448894	NotSig	Bacteria	Bacteroidetes	Bacteroidia	Bacteroidales	Prevotellaceae	Prevotella	0.084	0.136	0.022	0.194	0.067	0.054	0.102	0.101	0.085	0.061	0.042	0.117	0.168	0.111	0.582	0.018	0.114	0.107	0.043	0.028	0.08	0.108
OTU33	0.862	12.232	0.202088	0.449018	NotSig	Bacteria	Bacteroidetes	Bacteroidia	Bacteroidales	Prevotellaceae	Prevotella	0.648	0.36	0.861	1.525	1.759	0.073	0.547	0.096	0.154	0.692	0.129	0.64	0.754	0.389	0.145	0.07	0.451	0.472	0.515	0.088	0.187	0.531
OTU331	1.312	7.107	0.202161	0.449018	NotSig	Bacteria	Unassigned	Unassigned	Unassigned	Unassigned	Unassigned	0.014	0.005	0	0.034	0	0	0	0.041	0.006	0.008	0.007	0.048	0.007	0.018	0	0	0	0.015	0	0.006	0.005	0.002
OTU442	1.766	7.846	0.203096	0.450523	NotSig	Bacteria	Bacteroidetes	Bacteroidia	Bacteroidales	Prevotellaceae	Prevotella	0.031	0.007	0.002	0.14	0.011	0.019	0.002	0	0.024	0.114	0	0	0	0	0	0	0	0	0.003	0.068	0	0
OTU1160	1.391	5.689	0.205549	0.455386	NotSig	Bacteria	Firmicutes	Clostridia	Clostridiales	Ruminococcaceae	Unassigned	0.001	0	0.002	0	0.004	0	0	0.003	0	0.002	0	0	0	0	0	0	0	0	0	0	0	0.002
OTU822	-0.995	8.182	0.207368	0.458834	NotSig	Bacteria	Firmicutes	Clostridia	Clostridiales	Unassigned	Unassigned	0.017	0.036	0.005	0.007	0.004	0.016	0.022	0.005	0.024	0.016	0.037	0.028	0.072	0.011	0.01	0	0.013	0.005	0.04	0.011	0.007	0.193
OTU335	-1.411	5.792	0.207895	0.45942	NotSig	Bacteria	Unassigned	Unassigned	Unassigned	Unassigned	Unassigned	0	0.001	0	0	0	0.002	0.002	0	0	0	0	0	0	0.002	0.007	0	0.003	0.003	0	0	0	0
OTU639	-1.83	7.338	0.208839	0.460923	NotSig	Bacteria	Bacteroidetes	Bacteroidia	Bacteroidales	Porphyromonadaceae	Unassigned	0.006	0.016	0.01	0.041	0.002	0	0	0	0	0	0	0.004	0.005	0	0	0	0.003	0	0	0.145	0	0.009
OTU1271	-1.153	7.627	0.209327	0.461418	NotSig	Bacteria	Firmicutes	Clostridia	Clostridiales	Unassigned	Unassigned	0.011	0.023	0	0.007	0	0	0.011	0.018	0.009	0.026	0.035	0	0.011	0.034	0.007	0	0.044	0.051	0.043	0.002	0	0.035
OTU764	1.476	5.823	0.211693	0.466045	NotSig	Bacteria	Tenericutes	Mollicutes	Unassigned	Unassigned	Unassigned	0.002	0.001	0	0.01	0	0.005	0	0	0.002	0	0	0.002	0	0	0	0	0	0	0.003	0	0	0.002
OTU1258	1.536	7.04	0.214482	0.471591	NotSig	Bacteria	Firmicutes	Clostridia	Clostridiales	Unassigned	Unassigned	0.013	0.005	0	0.01	0	0	0.038	0	0.036	0.002	0.002	0.038	0.018	0	0	0	0	0	0	0.011	0	0.016
OTU395	-1.154	9.447	0.215454	0.472915	NotSig	Bacteria	Unassigned	Unassigned	Unassigned	Unassigned	Unassigned	0.048	0.083	0.002	0.002	0	0	0.05	0.119	0.006	0.022	0.27	0.004	0.016	0.07	0.16	0.025	0.078	0.066	0.023	0.006	0.344	0.042
OTU1236	-1.337	5.765	0.215626	0.472915	NotSig	Bacteria	Firmicutes	Clostridia	Clostridiales	Ruminococcaceae	Unassigned	0	0.002	0.002	0	0	0	0	0	0	0	0.002	0	0	0	0	0	0.003	0.003	0.009	0.002	0	0
OTU624	0.85	9.317	0.216082	0.473322	NotSig	Bacteria	Bacteroidetes	Bacteroidia	Bacteroidales	Porphyromonadaceae	Unassigned	0.077	0.043	0.022	0.024	0.067	0.18	0.16	0.074	0.015	0.081	0.136	0.014	0.059	0.151	0.037	0.016	0.034	0.015	0.028	0.013	0.047	0.028
OTU897	1.289	5.796	0.216537	0.473726	NotSig	Bacteria	Unassigned	Unassigned	Unassigned	Unassigned	Unassigned	0.002	0	0.002	0.002	0.004	0.005	0.002	0	0	0	0	0	0.002	0	0	0	0	0	0	0	0.002	0
OTU1520	2.362	5.847	0.218346	0.476669	NotSig	Bacteria	Firmicutes	Clostridia	Clostridiales	Ruminococcaceae	Clostridium_IV	0.003	0	0	0.027	0	0	0	0	0	0	0	0	0	0.002	0	0	0	0	0	0	0	0
OTU1618	-1.49	7.228	0.218428	0.476669	NotSig	Bacteria	Firmicutes	Clostridia	Clostridiales	Clostridiaceae_1	Clostridium_sensu_stricto	0.005	0.014	0.002	0.005	0.002	0	0.002	0	0.015	0.012	0.007	0.008	0	0	0	0	0	0.005	0.02	0.115	0	0
OTU1120	0.97	6.828	0.22054	0.480338	NotSig	Bacteria	Firmicutes	Clostridia	Clostridiales	Unassigned	Unassigned	0.009	0.005	0.019	0.002	0.013	0.005	0.002	0.005	0.011	0	0.005	0.028	0.009	0.007	0	0	0.003	0.005	0.006	0.009	0	0.009
OTU1439	1.12	8.531	0.22079	0.480338	NotSig	Bacteria	Firmicutes	Clostridia	Clostridiales	Clostridiaceae_1	Clostridium_sensu_stricto	0.05	0.02	0	0.082	0.031	0.002	0.03	0.003	0.011	0.189	0.097	0.056	0.009	0	0.005	0	0.034	0.008	0.006	0.009	0.097	0.033
OTU1561	-1.195	8.374	0.220933	0.480338	NotSig	Bacteria	Firmicutes	Clostridia	Clostridiales	Lachnospiraceae	Clostridium_XlVa	0.02	0.032	0.005	0	0.004	0	0.093	0.058	0	0.008	0.025	0.004	0.002	0.005	0.096	0.077	0.029	0.025	0.009	0.002	0.077	0.002
OTU703	-1.007	12.238	0.221371	0.480692	NotSig	Bacteria	Actinobacteria	Actinobacteria	Coriobacteriales	Coriobacteriaceae	Olsenella	0.314	0.649	0.033	0.349	0.009	1.023	0.113	1.045	0.043	0.317	0.196	0.012	0.591	2.693	0.012	0.599	0.907	0.719	0.108	0.135	0.319	0.406
OTU910	-1.868	5.942	0.222042	0.48141	NotSig	Bacteria	Firmicutes	Clostridia	Clostridiales	Ruminococcaceae	Ruminococcus	0	0.003	0	0	0	0.005	0	0	0	0	0	0	0.011	0	0	0	0	0	0	0	0.002	0.016
OTU428	1.029	7.38	0.222574	0.48141	NotSig	Bacteria	Bacteroidetes	Bacteroidia	Bacteroidales	Prevotellaceae	Unassigned	0.018	0.008	0.005	0.085	0.022	0	0.004	0.015	0.004	0.028	0.02	0.002	0	0.025	0.012	0	0.005	0.005	0.011	0.002	0.015	0.002
OTU879	-1.08	6.238	0.222823	0.48141	NotSig	Bacteria	Firmicutes	Clostridia	Clostridiales	Unassigned	Unassigned	0.002	0.004	0	0.01	0.004	0	0.002	0	0.002	0.002	0	0	0.014	0.002	0.002	0	0	0.005	0.003	0.006	0	0.012
OTU1747	1.525	5.713	0.223027	0.48141	NotSig	Bacteria	Firmicutes	Clostridia	Clostridiales	Unassigned	Unassigned	0.001	0	0	0.002	0	0	0	0	0	0	0.002	0.008	0	0	0	0	0	0.003	0	0	0	0
OTU1492	1.806	5.735	0.223079	0.48141	NotSig	Bacteria	Firmicutes	Clostridia	Clostridiales	Lachnospiraceae	Unassigned	0.001	0	0	0.002	0	0	0	0	0	0	0	0.012	0.002	0	0	0	0	0	0	0	0	0
OTU81	1.499	5.708	0.226824	0.488401	NotSig	Bacteria	Firmicutes	Clostridia	Unassigned	Unassigned	Unassigned	0.001	0	0.002	0.01	0	0	0.002	0	0	0	0	0	0	0	0	0	0	0	0.003	0	0	0
OTU1151	-1.026	5.544	0.227436	0.488401	NotSig	Bacteria	Unassigned	Unassigned	Unassigned	Unassigned	Unassigned	0	0	0	0	0	0	0	0	0	0	0	0	0	0	0	0.002	0	0	0	0	0	0
OTU1239	-1.026	5.544	0.227436	0.488401	NotSig	Bacteria	Firmicutes	Clostridia	Clostridiales	Ruminococcaceae	Oscillibacter	0	0	0	0	0	0	0	0	0	0	0	0	0	0	0	0.002	0	0	0	0	0	0
OTU749	-1.026	5.544	0.227436	0.488401	NotSig	Bacteria	Actinobacteria	Actinobacteria	Coriobacteriales	Coriobacteriaceae	Olsenella	0	0	0	0	0	0	0	0	0	0	0	0	0	0	0	0.002	0	0	0	0	0	0
OTU1559	1.438	5.699	0.228141	0.488593	NotSig	Bacteria	Firmicutes	Clostridia	Clostridiales	Ruminococcaceae	Unassigned	0.001	0	0.005	0	0	0	0.005	0.003	0	0	0	0	0	0	0	0	0	0.003	0	0	0	0
OTU634	1.356	9.182	0.228206	0.488593	NotSig	Bacteria	Bacteroidetes	Bacteroidia	Bacteroidales	Prevotellaceae	Unassigned	0.085	0.031	0.053	0.426	0.103	0	0.065	0	0.008	0.002	0.042	0.147	0.106	0.002	0	0	0	0	0.003	0.015	0.154	0.026
OTU1058	1.906	6.172	0.228364	0.488593	NotSig	Bacteria	Firmicutes	Clostridia	Clostridiales	Lachnospiraceae	Clostridium_XlVa	0.005	0.001	0.002	0	0.002	0	0	0.043	0	0.002	0	0	0	0	0	0	0	0	0.011	0	0	0
OTU601	-1.923	6.608	0.228669	0.488648	NotSig	Bacteria	Bacteroidetes	Bacteroidia	Bacteroidales	Prevotellaceae	Prevotella	0.002	0.008	0	0	0	0	0	0	0	0	0.025	0	0	0	0.002	0	0.021	0.028	0	0	0.032	0
OTU169	1.482	6.075	0.229396	0.489339	NotSig	Bacteria	Unassigned	Unassigned	Unassigned	Unassigned	Unassigned	0.003	0.001	0.002	0	0.002	0.002	0	0	0	0	0	0.026	0	0.002	0	0.002	0	0.003	0	0	0.002	0
OTU884	1.058	6.405	0.230549	0.489339	NotSig	Bacteria	Firmicutes	Clostridia	Clostridiales	Lachnospiraceae	Unassigned	0.006	0.002	0	0.015	0.002	0.002	0.004	0.003	0.008	0.004	0.015	0.006	0	0	0	0	0.005	0	0.003	0.013	0	0.002
OTU1051	-0.999	5.541	0.230817	0.489339	NotSig	Bacteria	Firmicutes	Clostridia	Clostridiales	Unassigned	Unassigned	0	0	0	0	0	0	0	0	0	0	0	0	0	0	0.002	0	0	0	0	0	0	0
OTU613	-0.999	5.541	0.230817	0.489339	NotSig	Bacteria	Bacteroidetes	Bacteroidia	Bacteroidales	Porphyromonadaceae	Unassigned	0	0	0	0	0	0	0	0	0	0	0	0	0	0	0.002	0	0	0	0	0	0	0
OTU674	-0.999	5.541	0.230817	0.489339	NotSig	Bacteria	Bacteroidetes	Bacteroidia	Bacteroidales	Prevotellaceae	Prevotella	0	0	0	0	0	0	0	0	0	0	0	0	0	0	0.002	0	0	0	0	0	0	0
OTU971	-0.999	5.541	0.230817	0.489339	NotSig	Bacteria	Firmicutes	Unassigned	Unassigned	Unassigned	Unassigned	0	0	0	0	0	0	0	0	0	0	0	0	0	0	0.002	0	0	0	0	0	0	0
OTU270	-1.326	5.662	0.230972	0.489339	NotSig	Bacteria	Unassigned	Unassigned	Unassigned	Unassigned	Unassigned	0	0.001	0	0	0	0	0	0	0	0	0.002	0	0	0.005	0	0	0	0.003	0	0	0.002	0
OTU792	-1.299	5.937	0.231232	0.489339	NotSig	Bacteria	Firmicutes	Clostridia	Clostridiales	Lachnospiraceae	Clostridium_XlVb	0.001	0.003	0	0.002	0	0	0	0	0	0	0.005	0.002	0.002	0	0	0.002	0	0	0.017	0.002	0	0.002
OTU1549	-1.732	5.816	0.231974	0.490316	NotSig	Bacteria	Firmicutes	Clostridia	Clostridiales	Lachnospiraceae	Unassigned	0	0.002	0	0	0	0	0.002	0	0	0	0.002	0	0	0	0	0	0	0	0.02	0	0	0.002
OTU207	-1.594	5.712	0.232522	0.490879	NotSig	Bacteria	Unassigned	Unassigned	Unassigned	Unassigned	Unassigned	0	0.001	0	0	0.002	0	0	0	0	0	0	0	0.005	0	0	0	0	0	0	0	0	0.009
OTU1510	1.413	6.104	0.235079	0.495679	NotSig	Bacteria	Firmicutes	Clostridia	Clostridiales	Ruminococcaceae	Unassigned	0.004	0.001	0	0.029	0	0	0.005	0	0	0	0	0.006	0.002	0.002	0	0	0.003	0	0.003	0.002	0	0
OTU396	0.815	9.903	0.236369	0.496692	NotSig	Bacteria	Bacteroidetes	Unassigned	Unassigned	Unassigned	Unassigned	0.112	0.064	0.019	0.189	0.049	0.232	0.03	0.086	0.148	0.177	0.015	0.175	0.122	0.025	0.057	0.016	0.044	0.038	0.054	0.165	0.077	0.04
OTU1406	0.831	9.904	0.236512	0.496692	NotSig	Bacteria	Firmicutes	Clostridia	Clostridiales	Lachnospiraceae	Dorea	0.11	0.066	0.077	0.077	0.058	0.412	0.025	0.043	0.06	0.177	0.092	0.078	0.084	0.05	0.037	0	0.083	0.071	0.054	0.103	0.077	0.106
OTU53	-1.827	9.08	0.236806	0.496692	NotSig	Bacteria	Spirochaetes	Spirochaetia	Spirochaetales	Spirochaetaceae	Treponema	0.024	0.066	0.005	0.002	0.013	0	0.151	0	0.006	0	0.01	0.048	0	0	0.002	0	0	0	0	0.662	0	0
OTU154	1.666	6.935	0.23821	0.496692	NotSig	Bacteria	Unassigned	Unassigned	Unassigned	Unassigned	Unassigned	0.013	0.004	0	0	0.002	0	0	0.132	0	0	0	0	0.007	0.007	0	0	0.003	0.013	0.003	0	0	0.007
OTU1276	1.207	6.259	0.238455	0.496692	NotSig	Bacteria	Firmicutes	Clostridia	Clostridiales	Ruminococcaceae	Unassigned	0.004	0.002	0.012	0.005	0.004	0.005	0.002	0.005	0.008	0	0	0.004	0.002	0	0	0	0	0	0	0	0.015	0
OTU462	-1.371	7.144	0.238498	0.496692	NotSig	Bacteria	Bacteroidetes	Bacteroidia	Bacteroidales	Porphyromonadaceae	Unassigned	0.006	0.014	0	0.034	0	0	0.002	0.008	0.006	0	0.002	0.006	0.034	0	0	0.005	0	0	0.003	0.066	0	0.028
OTU1573	-0.938	5.534	0.238866	0.496692	NotSig	Bacteria	Firmicutes	Clostridia	Clostridiales	Ruminococcaceae	Clostridium_IV	0	0	0	0	0	0	0	0	0	0	0	0	0	0	0	0	0	0	0	0	0.002	0
OTU1745	-0.938	5.534	0.238866	0.496692	NotSig	Bacteria	Firmicutes	Clostridia	Clostridiales	Clostridiaceae_1	Clostridium_sensu_stricto	0	0	0	0	0	0	0	0	0	0	0	0	0	0	0	0	0	0	0	0	0.002	0
OTU963	1.394	5.678	0.238936	0.496692	NotSig	Bacteria	Firmicutes	Clostridia	Clostridiales	Unassigned	Unassigned	0.001	0	0.002	0.005	0	0	0	0	0	0	0	0.004	0.002	0	0	0	0	0	0	0	0	0
OTU1640	-1.131	5.832	0.239224	0.496692	NotSig	Bacteria	Firmicutes	Clostridia	Clostridiales	Lachnospiraceae	Unassigned	0.001	0.002	0	0	0	0.002	0	0	0	0.002	0	0.002	0.005	0	0	0.002	0	0.003	0.003	0	0.005	0
OTU1715	1.76	5.753	0.240274	0.496692	NotSig	Bacteria	Firmicutes	Clostridia	Clostridiales	Clostridiales_Incertae_Sedis_XI	Helcococcus	0.002	0	0	0.012	0.004	0	0	0	0	0	0	0	0	0	0	0	0	0	0	0.002	0	0
OTU673	-0.924	5.532	0.240793	0.496692	NotSig	Bacteria	Bacteroidetes	Bacteroidia	Bacteroidales	Porphyromonadaceae	Unassigned	0	0	0	0	0	0	0	0	0	0	0	0	0	0	0	0	0.003	0	0	0	0	0
OTU973	-1.288	5.662	0.240979	0.496692	NotSig	Bacteria	Firmicutes	Clostridia	Clostridiales	Ruminococcaceae	Unassigned	0	0.001	0	0	0	0	0	0.003	0	0	0	0	0.002	0	0	0	0	0	0	0.004	0	0.002
OTU700	-1.224	10.36	0.242023	0.496692	NotSig	Bacteria	Firmicutes	Clostridia	Clostridiales	Lachnospiraceae	Unassigned	0.085	0.151	0.017	0.005	0.022	0.007	0.178	0.378	0.034	0.039	0.173	0	0.007	0.127	0.029	0.495	0.337	0.416	0	0	0.1	0
OTU1309	-0.915	5.532	0.242095	0.496692	NotSig	Bacteria	Unassigned	Unassigned	Unassigned	Unassigned	Unassigned	0	0	0	0	0	0	0	0	0	0	0	0	0	0	0	0	0	0	0	0.002	0	0
OTU347	-0.915	5.532	0.242095	0.496692	NotSig	Bacteria	Unassigned	Unassigned	Unassigned	Unassigned	Unassigned	0	0	0	0	0	0	0	0	0	0	0	0	0	0	0	0	0	0	0	0.002	0	0
OTU358	-0.915	5.532	0.242095	0.496692	NotSig	Bacteria	Firmicutes	Unassigned	Unassigned	Unassigned	Unassigned	0	0	0	0	0	0	0	0	0	0	0	0	0	0	0	0	0	0	0	0.002	0	0
OTU464	-0.915	5.532	0.242095	0.496692	NotSig	Bacteria	Bacteroidetes	Bacteroidia	Bacteroidales	Prevotellaceae	Prevotella	0	0	0	0	0	0	0	0	0	0	0	0	0	0	0	0	0	0	0	0.002	0	0
OTU525	-0.915	5.532	0.242095	0.496692	NotSig	Bacteria	Bacteroidetes	Bacteroidia	Bacteroidales	Bacteroidaceae	Bacteroides	0	0	0	0	0	0	0	0	0	0	0	0	0	0	0	0	0	0	0	0.002	0	0
OTU575	-0.915	5.532	0.242095	0.496692	NotSig	Bacteria	Bacteroidetes	Bacteroidia	Bacteroidales	Prevotellaceae	Prevotella	0	0	0	0	0	0	0	0	0	0	0	0	0	0	0	0	0	0	0	0.002	0	0
OTU978	-0.915	5.532	0.242095	0.496692	NotSig	Bacteria	Firmicutes	Unassigned	Unassigned	Unassigned	Unassigned	0	0	0	0	0	0	0	0	0	0	0	0	0	0	0	0	0	0	0	0.002	0	0
OTU981	-0.915	5.532	0.242095	0.496692	NotSig	Bacteria	Unassigned	Unassigned	Unassigned	Unassigned	Unassigned	0	0	0	0	0	0	0	0	0	0	0	0	0	0	0	0	0	0	0	0.002	0	0
OTU982	-0.915	5.532	0.242095	0.496692	NotSig	Bacteria	Elusimicrobia	Elusimicrobia	Elusimicrobiales	Elusimicrobiaceae	Elusimicrobium	0	0	0	0	0	0	0	0	0	0	0	0	0	0	0	0	0	0	0	0.002	0	0
OTU1205	-0.905	5.531	0.243407	0.497615	NotSig	Bacteria	Firmicutes	Unassigned	Unassigned	Unassigned	Unassigned	0	0	0	0	0	0	0	0	0	0	0	0	0	0	0	0	0	0.003	0	0	0	0
OTU160	-0.903	5.53	0.243683	0.497615	NotSig	Bacteria	Unassigned	Unassigned	Unassigned	Unassigned	Unassigned	0	0	0	0	0	0	0	0	0	0	0	0	0	0	0	0	0	0	0.003	0	0	0
OTU1657	-0.903	5.53	0.243683	0.497615	NotSig	Bacteria	Firmicutes	Clostridia	Clostridiales	Unassigned	Unassigned	0	0	0	0	0	0	0	0	0	0	0	0	0	0	0	0	0	0	0.003	0	0	0
OTU612	-0.903	5.53	0.243683	0.497615	NotSig	Bacteria	Bacteroidetes	Bacteroidia	Bacteroidales	Prevotellaceae	Prevotella	0	0	0	0	0	0	0	0	0	0	0	0	0	0	0	0	0	0	0.003	0	0	0
OTU24	-0.912	13.654	0.244454	0.498136	NotSig	Bacteria	Bacteroidetes	Bacteroidia	Bacteroidales	Prevotellaceae	Prevotella	0.91	1.681	1.856	1.329	3.741	0.002	0.24	0.647	0.214	0.162	0.173	0.734	3.258	4.935	1.966	0.602	0.301	0.236	0.492	2.006	0.822	2.191
OTU1375	-0.988	9.834	0.244508	0.498136	NotSig	Bacteria	Firmicutes	Clostridia	Clostridiales	Lachnospiraceae	Lachnospiracea_incertae_sedis	0.063	0.106	0.103	0.085	0.076	0.012	0.036	0.251	0.026	0	0.015	0.022	0.016	0.334	0.027	0.281	0.057	0.107	0.213	0.004	0.01	0.009
OTU440	-1.265	6.205	0.246037	0.499224	NotSig	Bacteria	Bacteroidetes	Bacteroidia	Bacteroidales	Porphyromonadaceae	Unassigned	0.002	0.004	0	0	0	0	0.004	0.008	0	0.002	0.005	0	0	0.02	0	0.002	0	0	0.003	0	0.012	0.005
OTU1484	0.991	6.298	0.246631	0.499224	NotSig	Bacteria	Firmicutes	Clostridia	Clostridiales	Ruminococcaceae	Unassigned	0.005	0.002	0.002	0.012	0.004	0.009	0.013	0.003	0	0.004	0	0	0.005	0	0.002	0	0.003	0	0.003	0.004	0	0.005
OTU1684	1.138	6.833	0.247259	0.499224	NotSig	Bacteria	Firmicutes	Clostridia	Clostridiales	Ruminococcaceae	Unassigned	0.008	0.004	0.005	0.002	0.004	0.052	0.002	0	0.011	0.002	0	0.002	0.005	0	0	0.002	0.005	0.003	0	0.017	0.002	0.005
OTU292	1.37	6.002	0.247452	0.499224	NotSig	Bacteria	Unassigned	Unassigned	Unassigned	Unassigned	Unassigned	0.003	0.001	0.007	0.002	0.007	0	0	0.013	0	0	0	0.002	0	0	0	0	0	0	0.006	0	0	0.005
OTU1703	1.498	5.833	0.248104	0.499224	NotSig	Bacteria	Firmicutes	Clostridia	Clostridiales	Unassigned	Unassigned	0.002	0.001	0	0	0	0	0.004	0	0.009	0.002	0	0.002	0	0	0	0	0	0	0.006	0	0	0
OTU1531	-1.23	6.701	0.248352	0.499224	NotSig	Bacteria	Firmicutes	Clostridia	Clostridiales	Lachnospiraceae	Unassigned	0.004	0.008	0.017	0	0.007	0	0.002	0	0	0.008	0.005	0	0	0	0.025	0	0.003	0.018	0.02	0.002	0.012	0
OTU64	-1.063	6.187	0.248729	0.499224	NotSig	Bacteria	Firmicutes	Unassigned	Unassigned	Unassigned	Unassigned	0.002	0.004	0.002	0	0	0.002	0.005	0	0	0.006	0.002	0	0.007	0	0.002	0	0	0.005	0	0.006	0.002	0.016
OTU927	-0.96	5.951	0.25013	0.499224	NotSig	Bacteria	Unassigned	Unassigned	Unassigned	Unassigned	Unassigned	0.001	0.002	0	0.002	0.002	0.002	0	0	0	0.002	0.002	0	0.007	0.002	0	0	0	0.003	0.006	0	0.005	0.002
OTU1035	-0.86	5.526	0.250197	0.499224	NotSig	Bacteria	Firmicutes	Clostridia	Unassigned	Unassigned	Unassigned	0	0	0	0	0	0	0	0	0	0	0	0	0	0	0	0	0	0	0	0	0	0.002
OTU1134	-0.86	5.526	0.250197	0.499224	NotSig	Bacteria	Firmicutes	Clostridia	Clostridiales	Ruminococcaceae	Unassigned	0	0	0	0	0	0	0	0	0	0	0	0	0	0	0	0	0	0	0	0	0	0.002
OTU1204	-0.86	5.526	0.250197	0.499224	NotSig	Bacteria	Firmicutes	Clostridia	Clostridiales	Unassigned	Unassigned	0	0	0	0	0	0	0	0	0	0	0	0	0	0	0	0	0	0	0	0	0	0.002
OTU1225	-0.86	5.526	0.250197	0.499224	NotSig	Bacteria	Candidatus_Saccharibacteria	Unassigned	Unassigned	Unassigned	Saccharibacteria_genera_incertae_sedis	0	0	0	0	0	0	0	0	0	0	0	0	0	0	0	0	0	0	0	0	0	0.002
OTU1628	-0.86	5.526	0.250197	0.499224	NotSig	Bacteria	Firmicutes	Clostridia	Clostridiales	Lachnospiraceae	Unassigned	0	0	0	0	0	0	0	0	0	0	0	0	0	0	0	0	0	0	0	0	0	0.002
OTU1634	-0.86	5.526	0.250197	0.499224	NotSig	Bacteria	Firmicutes	Clostridia	Clostridiales	Lachnospiraceae	Unassigned	0	0	0	0	0	0	0	0	0	0	0	0	0	0	0	0	0	0	0	0	0	0.002
OTU257	-0.86	5.526	0.250197	0.499224	NotSig	Bacteria	Unassigned	Unassigned	Unassigned	Unassigned	Unassigned	0	0	0	0	0	0	0	0	0	0	0	0	0	0	0	0	0	0	0	0	0	0.002
OTU290	-0.86	5.526	0.250197	0.499224	NotSig	Bacteria	Unassigned	Unassigned	Unassigned	Unassigned	Unassigned	0	0	0	0	0	0	0	0	0	0	0	0	0	0	0	0	0	0	0	0	0	0.002
OTU250	-1.836	10.88	0.25106	0.499224	NotSig	Bacteria	Spirochaetes	Spirochaetia	Spirochaetales	Spirochaetaceae	Treponema	0.08	0.248	0.086	0.109	0.072	0.056	0	0	0	0	0	0.481	0.025	0	0	0.002	0	0	0	2.423	0	0.028
OTU1012	-0.849	5.525	0.251897	0.499224	NotSig	Bacteria	Firmicutes	Clostridia	Clostridiales	Unassigned	Unassigned	0	0	0	0	0	0	0	0	0	0	0	0	0	0.002	0	0	0	0	0	0	0	0
OTU1642	-0.849	5.525	0.251897	0.499224	NotSig	Bacteria	Firmicutes	Clostridia	Clostridiales	Ruminococcaceae	Unassigned	0	0	0	0	0	0	0	0	0	0	0	0	0	0.002	0	0	0	0	0	0	0	0
OTU247	-0.849	5.525	0.251897	0.499224	NotSig	Bacteria	Unassigned	Unassigned	Unassigned	Unassigned	Unassigned	0	0	0	0	0	0	0	0	0	0	0	0	0	0.002	0	0	0	0	0	0	0	0
OTU272	-0.849	5.525	0.251897	0.499224	NotSig	Bacteria	Proteobacteria	Betaproteobacteria	Burkholderiales	Unassigned	Unassigned	0	0	0	0	0	0	0	0	0	0	0	0	0	0.002	0	0	0	0	0	0	0	0
OTU352	-0.849	5.525	0.251897	0.499224	NotSig	Bacteria	Unassigned	Unassigned	Unassigned	Unassigned	Unassigned	0	0	0	0	0	0	0	0	0	0	0	0	0	0.002	0	0	0	0	0	0	0	0
OTU568	-0.849	5.525	0.251897	0.499224	NotSig	Bacteria	Bacteroidetes	Bacteroidia	Bacteroidales	Prevotellaceae	Prevotella	0	0	0	0	0	0	0	0	0	0	0	0	0	0.002	0	0	0	0	0	0	0	0
OTU591	-0.849	5.525	0.251897	0.499224	NotSig	Bacteria	Bacteroidetes	Bacteroidia	Bacteroidales	Prevotellaceae	Prevotella	0	0	0	0	0	0	0	0	0	0	0	0	0	0.002	0	0	0	0	0	0	0	0
OTU27	0.838	12.456	0.253885	0.502595	NotSig	Bacteria	Bacteroidetes	Unassigned	Unassigned	Unassigned	Unassigned	0.799	0.385	0.143	3.779	0.049	0.087	0.554	0.883	0.21	0.826	0.233	1.225	1.001	0.427	0.875	0.177	0.148	0.066	0.154	0.107	0.448	0.446
OTU1123	-1.175	6.418	0.254636	0.502881	NotSig	Bacteria	Firmicutes	Clostridia	Clostridiales	Ruminococcaceae	Unassigned	0.003	0.006	0	0	0	0	0.002	0.01	0	0.006	0.01	0	0.009	0.009	0	0	0.01	0.025	0.006	0	0	0.002
OTU523	-1.01	6.734	0.254991	0.502881	NotSig	Bacteria	Bacteroidetes	Bacteroidia	Bacteroidales	Prevotellaceae	Prevotella	0.004	0.009	0.01	0.005	0.013	0	0	0.013	0	0	0	0.002	0.027	0.005	0.01	0	0.008	0.01	0.011	0	0.005	0.012
OTU1010	-0.824	5.523	0.255756	0.502881	NotSig	Bacteria	Unassigned	Unassigned	Unassigned	Unassigned	Unassigned	0	0	0	0	0	0	0	0	0	0	0	0	0.002	0	0	0	0	0	0	0	0	0
OTU1555	-0.824	5.523	0.255756	0.502881	NotSig	Bacteria	Firmicutes	Clostridia	Clostridiales	Ruminococcaceae	Unassigned	0	0	0	0	0	0	0	0	0	0	0	0	0.002	0	0	0	0	0	0	0	0	0
OTU354	-0.824	5.523	0.255756	0.502881	NotSig	Bacteria	Firmicutes	Unassigned	Unassigned	Unassigned	Unassigned	0	0	0	0	0	0	0	0	0	0	0	0	0.002	0	0	0	0	0	0	0	0	0
OTU88	-0.824	5.523	0.255756	0.502881	NotSig	Bacteria	Firmicutes	Unassigned	Unassigned	Unassigned	Unassigned	0	0	0	0	0	0	0	0	0	0	0	0	0.002	0	0	0	0	0	0	0	0	0
OTU1127	1.435	6.323	0.261163	0.512936	NotSig	Bacteria	Firmicutes	Clostridia	Clostridiales	Unassigned	Unassigned	0.006	0.002	0	0.002	0	0	0.047	0.008	0	0.002	0	0	0	0	0	0	0.005	0.003	0.003	0.006	0	0
OTU380	-1.377	5.653	0.261947	0.513682	NotSig	Bacteria	Actinobacteria	Actinobacteria	Actinomycetales	Actinomycetaceae	Actinomyces	0	0.001	0	0	0	0	0.002	0	0	0	0	0	0	0.005	0	0	0	0	0.006	0	0	0
OTU1452	1.217	6.055	0.262131	0.513682	NotSig	Bacteria	Firmicutes	Clostridia	Clostridiales	Ruminococcaceae	Unassigned	0.003	0.001	0.002	0	0.007	0	0.007	0	0.002	0.008	0.007	0	0.002	0	0	0	0	0	0.011	0	0	0
OTU1157	1.641	6.008	0.26282	0.514455	NotSig	Bacteria	Firmicutes	Clostridia	Clostridiales	Unassigned	Unassigned	0.003	0.001	0.005	0	0.004	0.014	0	0	0	0	0	0.004	0	0	0	0	0	0	0	0	0.007	0
OTU893	1.152	5.886	0.263976	0.515377	NotSig	Bacteria	Firmicutes	Clostridia	Clostridiales	Ruminococcaceae	Unassigned	0.002	0.001	0.002	0.002	0	0.007	0.002	0	0	0	0.005	0.002	0	0	0	0	0	0	0.006	0	0.002	0
OTU1385	-0.849	9.252	0.264063	0.515377	NotSig	Bacteria	Firmicutes	Clostridia	Clostridiales	Ruminococcaceae	Ruminococcus	0.046	0.073	0.084	0.237	0.029	0.002	0.005	0.015	0.008	0.026	0.025	0.024	0.02	0.029	0.039	0.005	0.098	0.142	0.128	0.049	0.177	0.04
OTU469	1.376	5.927	0.264388	0.515377	NotSig	Bacteria	Bacteroidetes	Bacteroidia	Bacteroidales	Bacteroidaceae	Bacteroides	0.002	0.001	0	0.007	0.007	0	0.002	0	0.004	0	0	0.004	0	0	0	0	0	0	0	0.006	0	0
OTU799	-0.731	10.786	0.26472	0.515377	NotSig	Bacteria	Firmicutes	Clostridia	Clostridiales	Ruminococcaceae	Unassigned	0.137	0.209	0.132	0.087	0.103	0.112	0.563	0.058	0.077	0.067	0.146	0.028	0.48	0.104	0.12	0.311	0.104	0.124	0.281	0.036	0.209	0.315
OTU1417	0.791	7.734	0.264915	0.515377	NotSig	Bacteria	Firmicutes	Clostridia	Clostridiales	Ruminococcaceae	Unassigned	0.022	0.012	0.026	0.056	0.016	0.002	0.022	0.005	0.047	0.028	0.012	0.006	0.025	0.002	0.002	0.005	0.008	0.023	0.006	0.026	0.005	0.021
OTU1429	-1.314	6.696	0.265059	0.515377	NotSig	Bacteria	Firmicutes	Clostridia	Clostridiales	Lachnospiraceae	Fusicatenibacter	0.004	0.009	0	0	0	0	0	0.008	0	0.004	0.027	0	0	0.009	0.002	0	0.023	0.015	0.014	0	0.022	0
OTU146	-0.903	6.948	0.265856	0.516351	NotSig	Bacteria	Unassigned	Unassigned	Unassigned	Unassigned	Unassigned	0.005	0.01	0.007	0.007	0.004	0	0	0.008	0.008	0	0	0.02	0.007	0.016	0.002	0.009	0.008	0.008	0.003	0.032	0.002	0.009
OTU1378	-0.893	10.349	0.266377	0.516558	NotSig	Bacteria	Firmicutes	Clostridia	Clostridiales	Ruminococcaceae	Unassigned	0.096	0.17	0.019	0.027	0.007	0.129	0.195	0.058	0.021	0.227	0.253	0.022	0.177	0.145	0.002	0.039	0.524	0.439	0.006	0.013	0.107	0.254
OTU1603	1.101	5.778	0.266566	0.516558	NotSig	Bacteria	Firmicutes	Clostridia	Clostridiales	Lachnospiraceae	Unassigned	0.001	0.001	0	0	0	0	0.004	0.003	0.002	0	0.005	0.002	0	0	0.002	0	0	0	0.003	0	0	0
OTU1501	-1.755	5.702	0.266849	0.516558	NotSig	Bacteria	Firmicutes	Clostridia	Clostridiales	Unassigned	Unassigned	0	0.001	0	0	0	0	0.002	0	0	0	0	0	0	0.014	0	0	0	0	0	0	0	0
OTU1384	1.037	8.284	0.268937	0.520024	NotSig	Bacteria	Firmicutes	Clostridia	Clostridiales	Lachnospiraceae	Unassigned	0.038	0.017	0.086	0.024	0.076	0.002	0.011	0.005	0.024	0.071	0.025	0.052	0.011	0	0.002	0	0.003	0	0.063	0.081	0	0.012
OTU196	1.693	5.851	0.270214	0.521812	NotSig	Bacteria	Unassigned	Unassigned	Unassigned	Unassigned	Unassigned	0.002	0.001	0	0	0	0	0	0	0.002	0	0	0.018	0.002	0	0	0	0	0	0.003	0	0	0
OTU1278	-1.17	6.739	0.270637	0.521812	NotSig	Bacteria	Unassigned	Unassigned	Unassigned	Unassigned	Unassigned	0.004	0.008	0.002	0.017	0	0	0.014	0	0	0.004	0.002	0.002	0.002	0	0.017	0.002	0	0	0.02	0.002	0.037	0
OTU161	-1.51	6.967	0.270757	0.521812	NotSig	Bacteria	Spirochaetes	Spirochaetia	Spirochaetales	Spirochaetaceae	Treponema	0.005	0.011	0	0.022	0	0.002	0.007	0	0	0.01	0	0.004	0.007	0	0	0	0	0	0.006	0.094	0	0
OTU1432	0.902	6.591	0.271145	0.521985	NotSig	Bacteria	Firmicutes	Clostridia	Clostridiales	Unassigned	Unassigned	0.007	0.003	0	0.002	0.002	0.002	0.018	0.005	0.017	0.012	0.005	0.004	0.005	0.005	0	0.002	0.003	0	0	0.009	0	0.012
OTU876	1.026	6.31	0.272289	0.523155	NotSig	Bacteria	Firmicutes	Clostridia	Clostridiales	Unassigned	Unassigned	0.004	0.002	0.002	0.002	0	0	0	0.003	0.023	0.002	0.005	0.006	0.002	0.005	0	0	0.003	0	0.006	0.002	0.005	0
OTU156	-1.156	6.875	0.272352	0.523155	NotSig	Bacteria	Proteobacteria	Gammaproteobacteria	Pasteurellales	Pasteurellaceae	Pasteurella	0.005	0.011	0.022	0	0	0	0	0.01	0.002	0.002	0	0.012	0.005	0.066	0.002	0	0.005	0.005	0.009	0.015	0	0
OTU1638	0.91	12.399	0.273589	0.524731	NotSig	Bacteria	Firmicutes	Clostridia	Clostridiales	Clostridiaceae_1	Clostridium_sensu_stricto	0.688	0.334	0.631	0.491	0.213	0.03	0.5	0.302	2.036	1.429	0.201	1.046	0.029	0.099	0.061	0.009	0.145	0.312	0.097	2.391	0.097	0.103
OTU1168	1.322	5.693	0.273874	0.524731	NotSig	Bacteria	Firmicutes	Clostridia	Clostridiales	Unassigned	Unassigned	0.001	0	0.007	0	0.002	0	0	0	0	0	0.002	0	0	0	0	0	0	0	0	0	0.002	0
OTU1211	-1.145	6.317	0.27426	0.524731	NotSig	Bacteria	Firmicutes	Clostridia	Clostridiales	Lachnospiraceae	Unassigned	0.002	0.005	0.002	0.012	0	0	0	0	0	0	0.01	0	0.007	0.002	0.002	0	0.018	0.01	0.003	0	0.007	0
OTU1179	-1.129	6.967	0.274389	0.524731	NotSig	Bacteria	Firmicutes	Clostridia	Clostridiales	Lachnospiraceae	Unassigned	0.006	0.01	0	0.002	0	0	0.009	0.028	0.002	0	0.015	0	0.002	0.009	0.022	0	0.003	0.003	0.006	0	0.052	0.007
OTU724	0.827	12.985	0.274938	0.524731	NotSig	Bacteria	Actinobacteria	Actinobacteria	Coriobacteriales	Coriobacteriaceae	Collinsella	0.964	0.579	0.041	0.259	0.04	4.527	1.47	0.72	0.124	1.539	0.865	0.056	0.496	1.066	0.265	0.35	0.617	0.47	0.654	0.338	0.904	0.634
OTU186	-1.787	6.014	0.274974	0.524731	NotSig	Bacteria	Spirochaetes	Spirochaetia	Spirochaetales	Spirochaetaceae	Treponema	0.001	0.003	0	0	0	0	0.004	0	0	0	0.005	0	0	0	0.015	0	0	0	0	0	0.012	0
OTU864	-0.889	6.821	0.275561	0.5252	NotSig	Bacteria	Firmicutes	Clostridia	Clostridiales	Unassigned	Unassigned	0.005	0.009	0.005	0.01	0.004	0	0.005	0.003	0.015	0.002	0	0.002	0.027	0.018	0.005	0.005	0.005	0	0	0.002	0.005	0.026
OTU834	0.906	8.316	0.27582	0.5252	NotSig	Bacteria	Firmicutes	Clostridia	Clostridiales	Unassigned	Unassigned	0.033	0.018	0.022	0.005	0.052	0.119	0.007	0.003	0.019	0.081	0.01	0.016	0.032	0.007	0.01	0.005	0.008	0	0.009	0.073	0.005	0.035
OTU1381	0.682	9.214	0.276125	0.525208	NotSig	Bacteria	Actinobacteria	Actinobacteria	Unassigned	Unassigned	Unassigned	0.074	0.042	0.031	0.031	0.045	0.016	0.178	0.053	0.054	0.148	0.151	0.032	0.063	0.056	0.027	0.027	0.039	0.023	0.02	0.047	0.027	0.087
OTU1525	1.034	5.758	0.2781	0.528142	NotSig	Bacteria	Firmicutes	Clostridia	Clostridiales	Ruminococcaceae	Clostridium_IV	0.001	0	0.002	0	0.002	0.002	0	0.003	0	0.002	0	0.002	0	0	0	0	0.003	0	0	0	0	0.002
OTU1631	0.916	5.538	0.27867	0.528142	NotSig	Bacteria	Firmicutes	Clostridia	Clostridiales	Ruminococcaceae	Unassigned	0	0	0	0	0	0.002	0	0	0	0	0	0	0	0	0	0	0	0	0	0	0	0
OTU802	0.916	5.538	0.27867	0.528142	NotSig	Bacteria	Firmicutes	Clostridia	Clostridiales	Unassigned	Unassigned	0	0	0	0	0	0.002	0	0	0	0	0	0	0	0	0	0	0	0	0	0	0	0
OTU1473	0.814	6.24	0.278876	0.528142	NotSig	Bacteria	Firmicutes	Clostridia	Clostridiales	Eubacteriaceae	Anaerofustis	0.004	0.002	0.005	0.005	0	0.005	0.005	0.005	0.004	0.002	0.007	0.004	0.002	0	0	0	0.003	0	0	0.002	0.005	0.009
OTU397	-0.863	9.501	0.279281	0.528233	NotSig	Bacteria	Bacteroidetes	Bacteroidia	Bacteroidales	Prevotellaceae	Prevotella	0.052	0.093	0.072	0.044	0.011	0.007	0.138	0.005	0.023	0.065	0.012	0.141	0.025	0.115	0.093	0	0.016	0.023	0.478	0.064	0.057	0.059
OTU1512	1.442	6.259	0.279961	0.528233	NotSig	Bacteria	Firmicutes	Clostridia	Clostridiales	Lachnospiraceae	Unassigned	0.006	0.002	0	0.01	0	0	0.002	0.008	0	0	0.037	0	0	0	0	0	0.003	0.003	0	0	0.01	0
OTU1435	-1.455	6.482	0.280008	0.528233	NotSig	Bacteria	Firmicutes	Clostridia	Clostridiales	Ruminococcaceae	Clostridium_IV	0.002	0.007	0	0	0	0	0	0.023	0.002	0	0	0	0.011	0	0	0	0.026	0.01	0.003	0	0	0.021
OTU497	1.534	5.955	0.280133	0.528233	NotSig	Bacteria	Bacteroidetes	Bacteroidia	Bacteroidales	Bacteroidaceae	Bacteroides	0.003	0.001	0	0.012	0.009	0	0	0	0.002	0	0	0.004	0	0	0	0	0	0	0.009	0	0	0
OTU553	1.974	5.77	0.281259	0.529786	NotSig	Bacteria	Bacteroidetes	Bacteroidia	Bacteroidales	Porphyromonadaceae	Unassigned	0.001	0	0	0	0	0	0	0	0.013	0	0	0	0	0	0	0	0	0	0	0	0	0.002
OTU1720	1.157	5.663	0.282444	0.531445	NotSig	Bacteria	Firmicutes	Clostridia	Clostridiales	Ruminococcaceae	Anaerotruncus	0.001	0	0.002	0	0.002	0.002	0	0	0	0.002	0	0	0	0	0	0	0	0	0	0	0	0.002
OTU1173	-1.187	7.5	0.282835	0.531608	NotSig	Bacteria	Firmicutes	Clostridia	Clostridiales	Lachnospiraceae	Unassigned	0.008	0.021	0.012	0	0.009	0	0.004	0.008	0.006	0	0.012	0.034	0.005	0	0.022	0	0	0	0.148	0.015	0	0.016
OTU431	1.019	7.913	0.2836	0.532473	NotSig	Bacteria	Bacteroidetes	Unassigned	Unassigned	Unassigned	Unassigned	0.024	0.012	0.007	0	0.004	0.124	0.09	0.005	0	0.004	0.007	0	0.018	0.014	0.01	0.025	0.016	0.008	0.006	0.002	0.002	0.019
OTU1024	1.133	5.657	0.287207	0.532566	NotSig	Bacteria	Firmicutes	Clostridia	Clostridiales	Unassigned	Unassigned	0.001	0	0.002	0.002	0.002	0	0	0	0	0	0.002	0	0	0	0	0	0	0	0	0	0	0.002
OTU1070	0.855	5.531	0.287546	0.532566	NotSig	Bacteria	Firmicutes	Clostridia	Clostridiales	Unassigned	Unassigned	0	0	0	0	0.002	0	0	0	0	0	0	0	0	0	0	0	0	0	0	0	0	0
OTU1514	0.855	5.531	0.287546	0.532566	NotSig	Bacteria	Firmicutes	Clostridia	Clostridiales	Lachnospiraceae	Unassigned	0	0	0	0	0.002	0	0	0	0	0	0	0	0	0	0	0	0	0	0	0	0	0
OTU1719	0.855	5.531	0.287546	0.532566	NotSig	Bacteria	Firmicutes	Clostridia	Clostridiales	Clostridiales_Incertae_Sedis_XI	Helcococcus	0	0	0	0	0.002	0	0	0	0	0	0	0	0	0	0	0	0	0	0	0	0	0
OTU1732	0.855	5.531	0.287546	0.532566	NotSig	Bacteria	Firmicutes	Clostridia	Clostridiales	Ruminococcaceae	Unassigned	0	0	0	0	0.002	0	0	0	0	0	0	0	0	0	0	0	0	0	0	0	0	0
OTU1734	0.855	5.531	0.287546	0.532566	NotSig	Bacteria	Firmicutes	Clostridia	Clostridiales	Unassigned	Unassigned	0	0	0	0	0.002	0	0	0	0	0	0	0	0	0	0	0	0	0	0	0	0	0
OTU517	0.855	5.531	0.287546	0.532566	NotSig	Bacteria	Bacteroidetes	Flavobacteriia	Flavobacteriales	Cryomorphaceae	Unassigned	0	0	0	0	0.002	0	0	0	0	0	0	0	0	0	0	0	0	0	0	0	0	0
OTU776	0.855	5.531	0.287546	0.532566	NotSig	Bacteria	Actinobacteria	Actinobacteria	Actinomycetales	Microbacteriaceae	Leucobacter	0	0	0	0	0.002	0	0	0	0	0	0	0	0	0	0	0	0	0	0	0	0	0
OTU1396	0.788	7.911	0.288055	0.532566	NotSig	Bacteria	Firmicutes	Clostridia	Clostridiales	Ruminococcaceae	Unassigned	0.027	0.015	0.017	0.085	0.018	0.009	0.043	0.008	0.004	0.055	0	0.034	0.036	0.005	0.005	0.002	0.029	0.02	0.003	0.011	0.017	0.019
OTU1069	0.852	5.531	0.288084	0.532566	NotSig	Bacteria	Firmicutes	Unassigned	Unassigned	Unassigned	Unassigned	0	0	0	0	0	0	0	0	0.002	0	0	0	0	0	0	0	0	0	0	0	0	0
OTU226	0.852	5.531	0.288084	0.532566	NotSig	Bacteria	Unassigned	Unassigned	Unassigned	Unassigned	Unassigned	0	0	0	0	0	0	0	0	0.002	0	0	0	0	0	0	0	0	0	0	0	0	0
OTU522	0.852	5.531	0.288084	0.532566	NotSig	Bacteria	Bacteroidetes	Bacteroidia	Bacteroidales	Bacteroidaceae	Bacteroides	0	0	0	0	0	0	0	0	0.002	0	0	0	0	0	0	0	0	0	0	0	0	0
OTU134	1.43	6.659	0.288342	0.532566	NotSig	Bacteria	Spirochaetes	Spirochaetia	Spirochaetales	Spirochaetaceae	Treponema	0.009	0.003	0.053	0	0.016	0	0	0	0	0	0.012	0.01	0.007	0	0	0	0	0	0.017	0	0	0.009
OTU953	1.503	5.7	0.290031	0.532566	NotSig	Bacteria	Firmicutes	Unassigned	Unassigned	Unassigned	Unassigned	0.001	0	0	0	0	0	0	0	0.008	0	0	0.002	0	0	0	0	0	0	0	0	0	0.002
OTU1414	0.985	7.908	0.29005	0.532566	NotSig	Bacteria	Firmicutes	Clostridia	Clostridiales	Lachnospiraceae	Unassigned	0.03	0.012	0.012	0.174	0.004	0	0.032	0.015	0.009	0.002	0.047	0.002	0	0.027	0.012	0.016	0	0.01	0.028	0	0.025	0.005
OTU191	1.185	6.186	0.291951	0.532566	NotSig	Bacteria	Unassigned	Unassigned	Unassigned	Unassigned	Unassigned	0.004	0.002	0	0.017	0.004	0	0	0	0.002	0.002	0	0.016	0.002	0	0	0	0.003	0	0	0.002	0	0.009
OTU1011	0.826	5.528	0.291983	0.532566	NotSig	Bacteria	Unassigned	Unassigned	Unassigned	Unassigned	Unassigned	0	0	0	0	0	0	0	0.003	0	0	0	0	0	0	0	0	0	0	0	0	0	0
OTU307	0.826	5.528	0.291983	0.532566	NotSig	Bacteria	Unassigned	Unassigned	Unassigned	Unassigned	Unassigned	0	0	0	0	0	0	0	0.003	0	0	0	0	0	0	0	0	0	0	0	0	0	0
OTU702	0.826	5.528	0.291983	0.532566	NotSig	Bacteria	Firmicutes	Clostridia	Clostridiales	Lachnospiraceae	Unassigned	0	0	0	0	0	0	0	0.003	0	0	0	0	0	0	0	0	0	0	0	0	0	0
OTU931	-1.244	5.744	0.29559	0.532566	NotSig	Bacteria	Firmicutes	Clostridia	Clostridiales	Ruminococcaceae	Unassigned	0	0.001	0	0.002	0	0	0	0	0	0.002	0	0	0.002	0	0.007	0	0	0	0	0	0	0.002
OTU1016	0.801	5.526	0.296146	0.532566	NotSig	Bacteria	Unassigned	Unassigned	Unassigned	Unassigned	Unassigned	0	0	0	0.002	0	0	0	0	0	0	0	0	0	0	0	0	0	0	0	0	0	0
OTU1068	0.801	5.526	0.296146	0.532566	NotSig	Bacteria	Unassigned	Unassigned	Unassigned	Unassigned	Unassigned	0	0	0	0.002	0	0	0	0	0	0	0	0	0	0	0	0	0	0	0	0	0	0
OTU1184	0.801	5.526	0.296146	0.532566	NotSig	Bacteria	Firmicutes	Clostridia	Clostridiales	Unassigned	Unassigned	0	0	0	0.002	0	0	0	0	0	0	0	0	0	0	0	0	0	0	0	0	0	0
OTU1216	0.801	5.526	0.296146	0.532566	NotSig	Bacteria	Firmicutes	Clostridia	Clostridiales	Lachnospiraceae	Unassigned	0	0	0	0.002	0	0	0	0	0	0	0	0	0	0	0	0	0	0	0	0	0	0
OTU1591	0.801	5.526	0.296146	0.532566	NotSig	Bacteria	Proteobacteria	Unassigned	Unassigned	Unassigned	Unassigned	0	0	0	0.002	0	0	0	0	0	0	0	0	0	0	0	0	0	0	0	0	0	0
OTU306	0.801	5.526	0.296146	0.532566	NotSig	Bacteria	Firmicutes	Bacilli	Bacillales	Staphylococcaceae	Jeotgalicoccus	0	0	0	0.002	0	0	0	0	0	0	0	0	0	0	0	0	0	0	0	0	0	0
OTU668	0.801	5.526	0.296146	0.532566	NotSig	Bacteria	Bacteroidetes	Bacteroidia	Bacteroidales	Porphyromonadaceae	Unassigned	0	0	0	0.002	0	0	0	0	0	0	0	0	0	0	0	0	0	0	0	0	0	0
OTU998	0.801	5.526	0.296146	0.532566	NotSig	Bacteria	Firmicutes	Clostridia	Clostridiales	Ruminococcaceae	Unassigned	0	0	0	0.002	0	0	0	0	0	0	0	0	0	0	0	0	0	0	0	0	0	0
OTU1574	0.8	5.526	0.296165	0.532566	NotSig	Bacteria	Synergistetes	Synergistia	Synergistales	Synergistaceae	Cloacibacillus	0	0	0.002	0	0	0	0	0	0	0	0	0	0	0	0	0	0	0	0	0	0	0
OTU1592	0.8	5.526	0.296165	0.532566	NotSig	Bacteria	Firmicutes	Clostridia	Clostridiales	Lachnospiraceae	Unassigned	0	0	0.002	0	0	0	0	0	0	0	0	0	0	0	0	0	0	0	0	0	0	0
OTU236	0.8	5.526	0.296165	0.532566	NotSig	Bacteria	Unassigned	Unassigned	Unassigned	Unassigned	Unassigned	0	0	0.002	0	0	0	0	0	0	0	0	0	0	0	0	0	0	0	0	0	0	0
OTU563	0.8	5.526	0.296165	0.532566	NotSig	Bacteria	Bacteroidetes	Bacteroidia	Bacteroidales	Prevotellaceae	Prevotella	0	0	0.002	0	0	0	0	0	0	0	0	0	0	0	0	0	0	0	0	0	0	0
OTU976	0.8	5.526	0.296165	0.532566	NotSig	Bacteria	Firmicutes	Clostridia	Clostridiales	Unassigned	Unassigned	0	0	0.002	0	0	0	0	0	0	0	0	0	0	0	0	0	0	0	0	0	0	0
OTU381	-1.258	6.712	0.296501	0.532566	NotSig	Bacteria	Bacteroidetes	Bacteroidia	Bacteroidales	Porphyromonadaceae	Parabacteroides	0.003	0.008	0	0	0	0.016	0	0.003	0	0.014	0	0	0	0.016	0.01	0.014	0.018	0.018	0	0	0.002	0
OTU1599	0.797	5.526	0.296748	0.532566	NotSig	Bacteria	Firmicutes	Clostridia	Clostridiales	Lachnospiraceae	Clostridium_XlVa	0	0	0	0	0	0	0	0	0	0	0	0.002	0	0	0	0	0	0	0	0	0	0
OTU1632	0.797	5.526	0.296748	0.532566	NotSig	Bacteria	Proteobacteria	Alphaproteobacteria	Unassigned	Unassigned	Unassigned	0	0	0	0	0	0	0	0	0	0	0	0.002	0	0	0	0	0	0	0	0	0	0
OTU1639	0.797	5.526	0.296748	0.532566	NotSig	Bacteria	Firmicutes	Clostridia	Clostridiales	Lachnospiraceae	Unassigned	0	0	0	0	0	0	0	0	0	0	0	0.002	0	0	0	0	0	0	0	0	0	0
OTU269	0.797	5.526	0.296748	0.532566	NotSig	Bacteria	Verrucomicrobia	Unassigned	Unassigned	Unassigned	Unassigned	0	0	0	0	0	0	0	0	0	0	0	0.002	0	0	0	0	0	0	0	0	0	0
OTU276	0.797	5.526	0.296748	0.532566	NotSig	Bacteria	Unassigned	Unassigned	Unassigned	Unassigned	Unassigned	0	0	0	0	0	0	0	0	0	0	0	0.002	0	0	0	0	0	0	0	0	0	0
OTU566	0.797	5.526	0.296748	0.532566	NotSig	Bacteria	Bacteroidetes	Bacteroidia	Bacteroidales	Prevotellaceae	Prevotella	0	0	0	0	0	0	0	0	0	0	0	0.002	0	0	0	0	0	0	0	0	0	0
OTU1213	0.797	5.526	0.29681	0.532566	NotSig	Bacteria	Firmicutes	Clostridia	Clostridiales	Ruminococcaceae	Unassigned	0	0	0	0	0	0	0	0	0	0	0.002	0	0	0	0	0	0	0	0	0	0	0
OTU1220	0.797	5.526	0.29681	0.532566	NotSig	Bacteria	Candidatus_Saccharibacteria	Unassigned	Unassigned	Unassigned	Saccharibacteria_genera_incertae_sedis	0	0	0	0	0	0	0	0	0	0	0.002	0	0	0	0	0	0	0	0	0	0	0
OTU1744	0.797	5.526	0.29681	0.532566	NotSig	Archaea	Euryarchaeota	Thermoplasmata	Methanomassiliicoccales	Methanomassiliicoccaceae	Methanomassiliicoccus	0	0	0	0	0	0	0	0	0	0	0.002	0	0	0	0	0	0	0	0	0	0	0
OTU861	1.046	6.433	0.297055	0.532566	NotSig	Bacteria	Firmicutes	Clostridia	Clostridiales	Ruminococcaceae	Unassigned	0.006	0.003	0.029	0	0	0	0.005	0.008	0	0.002	0.015	0.006	0	0	0	0.002	0.008	0.008	0.003	0	0.005	0
OTU193	1.928	5.93	0.29882	0.535182	NotSig	Bacteria	Firmicutes	Bacilli	Lactobacillales	Unassigned	Unassigned	0.002	0.001	0	0	0.025	0	0	0	0	0	0	0	0	0	0	0	0.003	0.003	0	0	0	0
OTU412	1.498	8.649	0.299731	0.536263	NotSig	Bacteria	Bacteroidetes	Bacteroidia	Bacteroidales	Bacteroidaceae	Bacteroides	0.05	0.017	0.002	0.068	0	0	0	0	0.105	0	0.002	0.326	0.02	0.02	0	0	0	0	0	0.118	0	0.014
OTU722	0.767	11.716	0.300251	0.536569	NotSig	Bacteria	Firmicutes	Clostridia	Clostridiales	Ruminococcaceae	Unassigned	0.456	0.241	0.108	0.123	0.213	0.183	2.594	0.375	0.101	0.217	0.221	0.424	0.12	0.585	0.128	0.095	0.282	0.3	0.043	0.019	0.772	0.063
OTU76	-0.778	8.966	0.300624	0.536569	NotSig	Bacteria	Spirochaetes	Spirochaetia	Spirochaetales	Spirochaetaceae	Treponema	0.034	0.058	0.026	0.036	0.067	0.026	0.013	0.02	0.028	0.014	0.072	0.038	0.034	0.002	0.005	0.005	0.114	0.244	0.017	0.085	0.012	0.066
OTU711	0.7	12.952	0.300822	0.536569	NotSig	Bacteria	Firmicutes	Clostridia	Clostridiales	Ruminococcaceae	Unassigned	0.988	0.634	1.189	1.847	0.649	1.253	0.448	0.515	1.238	1.441	0.758	0.545	1.723	0.438	0.152	0.161	0.143	0.099	0.381	1.011	0.087	2.142
OTU907	0.768	6.52	0.302375	0.538789	NotSig	Bacteria	Firmicutes	Clostridia	Clostridiales	Ruminococcaceae	Unassigned	0.006	0.003	0.002	0.01	0.011	0.005	0.004	0.01	0	0.006	0.017	0	0.002	0.002	0.002	0	0.008	0.005	0.006	0.002	0	0.007
OTU1335	-1.291	5.675	0.303861	0.540885	NotSig	Bacteria	Synergistetes	Synergistia	Synergistales	Synergistaceae	Cloacibacillus	0	0.001	0	0	0	0	0	0.003	0	0	0	0	0	0	0	0.007	0	0	0	0	0	0
OTU351	1.248	5.683	0.305043	0.542176	NotSig	Bacteria	Unassigned	Unassigned	Unassigned	Unassigned	Unassigned	0.001	0	0	0	0	0.005	0	0	0.002	0	0.002	0	0	0	0	0	0	0.003	0	0	0	0
OTU256	1.218	5.668	0.30542	0.542176	NotSig	Bacteria	Unassigned	Unassigned	Unassigned	Unassigned	Unassigned	0.001	0	0	0.002	0	0.002	0	0.005	0	0	0	0	0	0	0	0	0	0	0	0	0	0.002
OTU1262	-0.96	8.257	0.305517	0.542176	NotSig	Bacteria	Firmicutes	Clostridia	Clostridiales	Eubacteriaceae	Eubacterium	0.02	0.036	0	0.002	0	0	0.138	0.025	0.004	0.016	0.01	0.004	0.011	0.086	0.002	0.014	0.003	0.013	0.097	0.011	0.1	0.021
OTU1202	0.734	5.52	0.307639	0.544252	NotSig	Bacteria	Firmicutes	Clostridia	Clostridiales	Unassigned	Unassigned	0	0	0	0	0	0	0	0	0	0.002	0	0	0	0	0	0	0	0	0	0	0	0
OTU242	0.734	5.52	0.307639	0.544252	NotSig	Bacteria	Unassigned	Unassigned	Unassigned	Unassigned	Unassigned	0	0	0	0	0	0	0	0	0	0.002	0	0	0	0	0	0	0	0	0	0	0	0
OTU935	0.912	6.152	0.307867	0.544252	NotSig	Bacteria	Firmicutes	Clostridia	Clostridiales	Unassigned	Unassigned	0.003	0.002	0	0.007	0.007	0	0.002	0	0.009	0.002	0.002	0.004	0.002	0	0.002	0	0.003	0	0.009	0	0	0.002
OTU1023	-1.117	5.707	0.308128	0.544252	NotSig	Bacteria	Unassigned	Unassigned	Unassigned	Unassigned	Unassigned	0	0.001	0	0	0	0	0	0	0	0.004	0	0	0.005	0	0	0	0.003	0	0	0.002	0	0.002
OTU770	0.752	6.99	0.308243	0.544252	NotSig	Bacteria	Actinobacteria	Actinobacteria	Actinomycetales	Micrococcaceae	Rothia	0.011	0.006	0.005	0	0.002	0	0.016	0.005	0.013	0.024	0.007	0.034	0.002	0.005	0.005	0.002	0.008	0.005	0.009	0.006	0.012	0.005
OTU1340	-1.029	5.808	0.30872	0.544281	NotSig	Bacteria	Firmicutes	Clostridia	Clostridiales	Unassigned	Unassigned	0.001	0.002	0.005	0	0.002	0	0	0	0	0	0	0	0.002	0.002	0	0	0	0	0.003	0	0.002	0.007
OTU128	0.991	6.922	0.309284	0.544281	NotSig	Bacteria	Unassigned	Unassigned	Unassigned	Unassigned	Unassigned	0.01	0.005	0.007	0.015	0.002	0	0.025	0.003	0.036	0.008	0	0.004	0.009	0	0.005	0	0	0	0.031	0.004	0	0.005
OTU1029	0.719	5.519	0.31037	0.544281	NotSig	Bacteria	Firmicutes	Unassigned	Unassigned	Unassigned	Unassigned	0	0	0	0	0	0	0.002	0	0	0	0	0	0	0	0	0	0	0	0	0	0	0
OTU1497	0.719	5.519	0.31037	0.544281	NotSig	Bacteria	Firmicutes	Clostridia	Clostridiales	Lachnospiraceae	Unassigned	0	0	0	0	0	0	0.002	0	0	0	0	0	0	0	0	0	0	0	0	0	0	0
OTU1595	0.719	5.519	0.31037	0.544281	NotSig	Bacteria	Unassigned	Unassigned	Unassigned	Unassigned	Unassigned	0	0	0	0	0	0	0.002	0	0	0	0	0	0	0	0	0	0	0	0	0	0	0
OTU227	0.719	5.519	0.31037	0.544281	NotSig	Bacteria	Firmicutes	Bacilli	Lactobacillales	Lactobacillaceae	Lactobacillus	0	0	0	0	0	0	0.002	0	0	0	0	0	0	0	0	0	0	0	0	0	0	0
OTU1391	-0.74	8.369	0.310494	0.544281	NotSig	Bacteria	Firmicutes	Clostridia	Clostridiales	Lachnospiraceae	Coprococcus	0.022	0.037	0.022	0.044	0.016	0	0.014	0.008	0.045	0.022	0.042	0.01	0.038	0.043	0.032	0.005	0.052	0.023	0.094	0	0.042	0.045
OTU421	-0.842	8.489	0.311033	0.544281	NotSig	Bacteria	Bacteroidetes	Unassigned	Unassigned	Unassigned	Unassigned	0.021	0.041	0.019	0	0.025	0.084	0.034	0.015	0	0.014	0.022	0	0.138	0.045	0.049	0.005	0.041	0.023	0.006	0.043	0.027	0.033
OTU181	0.888	5.992	0.311254	0.544281	NotSig	Bacteria	Firmicutes	Bacilli	Lactobacillales	Streptococcaceae	Streptococcus	0.003	0.001	0.002	0.002	0.002	0	0	0.005	0	0.002	0.005	0.008	0	0.002	0	0	0	0	0.003	0.004	0.002	0
OTU857	1.224	5.681	0.311373	0.544281	NotSig	Bacteria	Firmicutes	Clostridia	Clostridiales	Unassigned	Unassigned	0.001	0	0	0	0	0.005	0	0.003	0	0	0.002	0	0	0	0	0	0	0	0	0.002	0	0
OTU367	0.852	7.363	0.312085	0.544979	NotSig	Bacteria	Bacteroidetes	Bacteroidia	Bacteroidales	Prevotellaceae	Unassigned	0.017	0.008	0.007	0.019	0.013	0.016	0	0.015	0	0.079	0.015	0.004	0.007	0.002	0.007	0	0.005	0.008	0	0.011	0.027	0.014
OTU115	-1.008	9.62	0.312548	0.545244	NotSig	Bacteria	Firmicutes	Negativicutes	Selenomonadales	Veillonellaceae	Allisonella	0.054	0.091	0	0.002	0	0.061	0.066	0.178	0	0.106	0.131	0	0.011	0.221	0.005	0.182	0.132	0.17	0.023	0.006	0.152	0.009
OTU1365	0.947	9.148	0.314171	0.547183	NotSig	Bacteria	Firmicutes	Clostridia	Clostridiales	Ruminococcaceae	Unassigned	0.066	0.037	0.014	0.097	0.018	0.007	0.111	0.003	0.233	0.057	0.015	0.103	0.102	0.007	0.007	0	0	0	0.077	0.118	0.002	0.056
OTU1136	0.863	6.535	0.314541	0.547183	NotSig	Bacteria	Firmicutes	Clostridia	Clostridiales	Ruminococcaceae	Unassigned	0.006	0.003	0.01	0.005	0	0	0	0.003	0.017	0.002	0.02	0.008	0.014	0	0.002	0.002	0	0.005	0.003	0.002	0.002	0.002
OTU716	-0.681	12.561	0.314599	0.547183	NotSig	Bacteria	Firmicutes	Clostridia	Clostridiales	Ruminococcaceae	Unassigned	0.5	0.7	0.799	0.063	0.276	0.201	0.434	0.322	0.374	0.325	1.794	0.412	0.568	0.075	0.278	0.336	0.409	0.411	0.336	1.412	2.132	1.038
OTU1442	0.889	6.391	0.315758	0.54795	NotSig	Bacteria	Firmicutes	Clostridia	Clostridiales	Ruminococcaceae	Unassigned	0.005	0.003	0.007	0.007	0.007	0.002	0.018	0	0.002	0	0.005	0.006	0.005	0	0	0	0.008	0	0.009	0.006	0	0
OTU831	1.386	6.631	0.31585	0.54795	NotSig	Bacteria	Firmicutes	Clostridia	Clostridiales	Lachnospiraceae	Pseudobutyrivibrio	0.006	0.003	0	0	0	0	0	0	0.06	0	0.002	0	0.005	0.011	0	0	0.003	0.008	0.003	0	0	0.002
OTU1421	-0.771	7.809	0.31598	0.54795	NotSig	Bacteria	Firmicutes	Clostridia	Clostridiales	Ruminococcaceae	Unassigned	0.015	0.023	0.005	0.029	0.007	0	0.016	0.071	0.004	0.002	0.01	0.004	0.045	0.007	0.005	0.018	0.01	0.015	0.026	0.004	0.065	0.031
OTU1462	1.063	6.59	0.316639	0.548528	NotSig	Bacteria	Firmicutes	Unassigned	Unassigned	Unassigned	Unassigned	0.007	0.003	0.024	0.005	0.007	0.019	0.009	0	0	0	0.007	0	0	0	0	0.011	0.003	0.003	0	0.002	0.007	0
OTU129	-1.629	7.693	0.316941	0.548528	NotSig	Bacteria	Unassigned	Unassigned	Unassigned	Unassigned	Unassigned	0.009	0.022	0	0	0	0	0	0.013	0.008	0	0.062	0.006	0	0	0	0	0	0	0	0.199	0	0.016
OTU1518	1.046	5.754	0.32019	0.553603	NotSig	Bacteria	Firmicutes	Clostridia	Clostridiales	Unassigned	Unassigned	0.001	0	0.002	0.002	0	0	0.005	0	0	0.002	0.002	0	0	0	0	0	0	0	0	0.004	0	0
OTU151	-0.978	6.635	0.322261	0.556633	NotSig	Bacteria	Unassigned	Unassigned	Unassigned	Unassigned	Unassigned	0.003	0.007	0.012	0	0.004	0.009	0	0	0.006	0	0.002	0	0	0	0.01	0	0.005	0.01	0.006	0.002	0.027	0.009
OTU1246	1.272	6.583	0.323576	0.558353	NotSig	Bacteria	Firmicutes	Clostridia	Clostridiales	Lachnospiraceae	Unassigned	0.008	0.003	0.045	0	0.022	0	0	0	0	0.006	0	0.004	0.002	0	0.01	0	0	0	0.011	0	0	0.005
OTU378	-2.084	5.961	0.324582	0.559019	NotSig	Bacteria	Bacteroidetes	Bacteroidia	Bacteroidales	Prevotellaceae	Prevotella	0.001	0.003	0	0	0	0	0.005	0	0	0	0	0	0	0	0	0	0	0	0	0.026	0	0
OTU1061	1.123	6.08	0.324746	0.559019	NotSig	Bacteria	Unassigned	Unassigned	Unassigned	Unassigned	Unassigned	0.004	0.001	0	0.01	0.004	0	0.004	0.015	0	0	0.002	0	0	0	0.002	0	0	0	0	0.006	0.002	0
OTU1044	-1.464	6.042	0.324922	0.559019	NotSig	Bacteria	Firmicutes	Clostridia	Clostridiales	Lachnospiraceae	Unassigned	0.001	0.003	0	0	0	0	0.002	0	0.004	0.004	0	0	0	0	0	0	0	0	0.011	0.019	0	0
OTU443	0.85	8.873	0.325686	0.559783	NotSig	Bacteria	Bacteroidetes	Bacteroidia	Bacteroidales	Porphyromonadaceae	Unassigned	0.063	0.031	0.033	0.412	0.009	0.002	0.027	0.028	0.021	0.093	0	0.002	0.045	0.014	0.01	0.002	0.111	0.061	0.026	0.011	0.012	0.021
OTU1124	1.241	6.101	0.326068	0.559888	NotSig	Bacteria	Firmicutes	Clostridia	Clostridiales	Unassigned	Unassigned	0.004	0.001	0.007	0.019	0.009	0	0	0	0	0.002	0	0	0	0	0.002	0	0	0	0.009	0.002	0	0
OTU1630	-0.992	5.871	0.32729	0.561436	NotSig	Bacteria	Firmicutes	Clostridia	Clostridiales	Lachnospiraceae	Unassigned	0.001	0.002	0.002	0	0	0	0.002	0.005	0	0	0	0	0.002	0.002	0.002	0	0	0	0.011	0	0	0.002
OTU63	0.889	6.668	0.328217	0.562474	NotSig	Bacteria	Firmicutes	Clostridia	Unassigned	Unassigned	Unassigned	0.007	0.004	0.002	0.007	0.004	0.009	0.002	0.008	0.004	0	0.01	0.028	0.014	0	0	0	0	0	0	0.011	0.007	0.007
OTU1257	-0.921	9.296	0.329198	0.563081	NotSig	Bacteria	Firmicutes	Clostridia	Clostridiales	Ruminococcaceae	Unassigned	0.044	0.069	0.158	0.002	0.067	0.005	0.093	0.008	0.017	0.065	0	0.02	0.011	0.016	0.002	0	0.075	0.038	0.023	0.466	0.052	0.009
OTU1280	-0.839	6.083	0.329379	0.563081	NotSig	Bacteria	Firmicutes	Clostridia	Clostridiales	Unassigned	Unassigned	0.002	0.003	0	0.005	0	0	0.004	0.003	0.002	0.002	0	0.002	0.009	0.009	0	0	0	0	0.003	0.004	0	0.007
OTU83	0.854	10.925	0.329538	0.563081	NotSig	Bacteria	Spirochaetes	Spirochaetia	Spirochaetales	Spirochaetaceae	Treponema	0.25	0.13	0.32	0.01	1.029	0.002	0.007	0.705	0.098	0.26	0.067	0	0.111	0.323	0.15	0.1	0.013	0.025	0.105	0.083	0.227	0.164
OTU1306	0.847	6.33	0.335667	0.572995	NotSig	Bacteria	Firmicutes	Clostridia	Clostridiales	Lachnospiraceae	Unassigned	0.005	0.002	0.007	0.005	0.002	0.007	0	0	0.004	0.002	0.02	0.002	0.002	0.005	0	0.002	0	0	0.009	0.006	0	0
OTU1347	-0.821	10.124	0.336574	0.573982	NotSig	Bacteria	Firmicutes	Clostridia	Clostridiales	Unassigned	Unassigned	0.092	0.134	0.024	0.017	0.007	0	0.039	0.195	0	0.059	0.572	0.006	0.066	0.14	0.214	0.014	0.088	0.175	0.208	0.156	0.117	0.162
OTU445	0.785	9.654	0.337361	0.574763	NotSig	Bacteria	Bacteroidetes	Bacteroidia	Bacteroidales	Prevotellaceae	Prevotella	0.103	0.056	0.194	0.107	0.294	0	0.323	0.013	0.015	0.063	0.012	0.008	0.199	0.077	0.103	0.018	0.054	0.02	0.017	0.009	0.035	0.026
OTU333	0.889	5.927	0.337838	0.575015	NotSig	Bacteria	Firmicutes	Unassigned	Unassigned	Unassigned	Unassigned	0.002	0.001	0	0.002	0.002	0	0.002	0.01	0.002	0.002	0	0.002	0	0	0	0	0.003	0.003	0	0	0.005	0
OTU1635	-0.996	6.568	0.338575	0.575504	NotSig	Bacteria	Firmicutes	Clostridia	Clostridiales	Lachnospiraceae	Roseburia	0.004	0.007	0.022	0.005	0	0	0.002	0.003	0	0.002	0	0.004	0.002	0	0.015	0	0	0.003	0.037	0	0.01	0.002
OTU924	1.099	5.661	0.338784	0.575504	NotSig	Bacteria	Firmicutes	Clostridia	Clostridiales	Unassigned	Unassigned	0.001	0	0	0.002	0.002	0	0	0	0	0	0	0.004	0	0	0	0	0	0	0	0.002	0	0
OTU59	0.735	6.764	0.341923	0.579879	NotSig	Bacteria	Firmicutes	Unassigned	Unassigned	Unassigned	Unassigned	0.008	0.005	0.005	0.002	0.007	0.007	0.004	0	0.017	0.008	0.007	0.02	0.016	0.005	0	0.005	0.003	0	0	0.009	0.005	0.005
OTU1224	-1.346	5.959	0.342023	0.579879	NotSig	Bacteria	Firmicutes	Negativicutes	Selenomonadales	Veillonellaceae	Megasphaera	0.001	0.002	0	0	0	0	0	0.005	0	0	0.005	0	0	0	0	0.007	0	0.008	0	0	0	0.009
OTU195	1.363	6.245	0.343924	0.581782	NotSig	Bacteria	Firmicutes	Negativicutes	Selenomonadales	Veillonellaceae	Mitsuokella	0.005	0.001	0	0	0	0.012	0.009	0	0	0	0.025	0.002	0	0	0	0.009	0	0	0	0	0.002	0
OTU1132	-0.912	6.739	0.344448	0.581782	NotSig	Bacteria	Firmicutes	Clostridia	Clostridiales	Lachnospiraceae	Cellulosilyticum	0.004	0.008	0	0.015	0.002	0	0	0	0.009	0.006	0.002	0.008	0	0.002	0	0	0.039	0.02	0.006	0.009	0.002	0.005
OTU454	1.044	8.123	0.344634	0.581782	NotSig	Bacteria	Bacteroidetes	Bacteroidia	Bacteroidales	Bacteroidaceae	Bacteroides	0.036	0.017	0.033	0.08	0.004	0	0	0.028	0.023	0.181	0	0.008	0.093	0.005	0	0	0.003	0	0.011	0.004	0	0.059
OTU1143	-0.862	6.06	0.344735	0.581782	NotSig	Bacteria	Firmicutes	Clostridia	Clostridiales	Ruminococcaceae	Oscillibacter	0.002	0.003	0.005	0	0.002	0.002	0.002	0	0	0.002	0.002	0	0.002	0	0	0	0.008	0.013	0	0	0.002	0.005
OTU202	1.268	5.678	0.344849	0.581782	NotSig	Bacteria	Firmicutes	Bacilli	Lactobacillales	Lactobacillaceae	Lactobacillus	0.001	0	0	0	0	0	0.002	0	0	0	0.01	0	0	0	0	0	0	0.003	0	0	0	0
OTU82	1.124	5.687	0.345142	0.581782	NotSig	Bacteria	Proteobacteria	Deltaproteobacteria	Desulfovibrionales	Desulfovibrionaceae	Bilophila	0.001	0	0	0	0.002	0.005	0.002	0	0	0	0	0	0	0	0.002	0	0	0	0	0	0	0
OTU562	-1.132	5.632	0.345991	0.582651	NotSig	Bacteria	Bacteroidetes	Bacteroidia	Bacteroidales	Prevotellaceae	Prevotella	0	0.001	0	0	0	0	0	0	0	0.002	0	0	0.002	0	0.002	0	0	0	0.003	0	0	0
OTU1426	0.738	7.008	0.346999	0.583786	NotSig	Bacteria	Firmicutes	Unassigned	Unassigned	Unassigned	Unassigned	0.011	0.006	0.017	0	0.004	0.021	0.013	0.02	0.006	0.006	0.017	0.004	0.005	0.007	0	0.005	0	0	0.003	0.004	0.015	0.023
OTU1430	-0.745	7.223	0.347475	0.584025	NotSig	Bacteria	Firmicutes	Clostridia	Clostridiales	Ruminococcaceae	Unassigned	0.008	0.012	0.01	0.005	0.007	0	0.007	0.023	0.008	0.006	0	0.016	0.016	0.007	0.007	0.02	0.013	0.051	0.003	0	0.005	0.002
OTU632	1.077	7.944	0.350482	0.588513	NotSig	Bacteria	Bacteroidetes	Bacteroidia	Bacteroidales	Prevotellaceae	Unassigned	0.027	0.014	0.002	0.099	0	0.005	0	0.041	0.086	0.004	0.002	0.028	0.05	0	0	0	0	0	0.017	0.038	0	0.031
OTU1507	-1.615	6.235	0.350841	0.58855	NotSig	Bacteria	Firmicutes	Clostridia	Clostridiales	Unassigned	Unassigned	0.001	0.005	0	0	0	0.009	0	0	0	0	0.002	0	0	0	0	0	0.021	0.028	0	0	0	0
OTU201	-1.599	5.888	0.3514	0.588924	NotSig	Bacteria	Deferribacteres	Deferribacteres	Deferribacterales	Deferribacteraceae	Mucispirillum	0	0.003	0	0	0	0.005	0	0	0	0	0	0	0.009	0	0	0	0	0	0	0	0	0.016
OTU1321	1.008	5.756	0.352121	0.589357	NotSig	Bacteria	Unassigned	Unassigned	Unassigned	Unassigned	Unassigned	0.001	0	0.002	0	0.004	0	0.002	0	0.002	0	0	0.002	0	0	0	0	0	0	0	0.004	0	0
OTU400	-1.107	5.628	0.352663	0.589357	NotSig	Bacteria	Bacteroidetes	Bacteroidia	Bacteroidales	Prevotellaceae	Prevotella	0	0.001	0	0	0	0	0	0	0	0.002	0	0	0	0.002	0	0	0.005	0	0	0	0	0
OTU1379	0.639	9.459	0.352737	0.589357	NotSig	Bacteria	Firmicutes	Clostridia	Clostridiales	Ruminococcaceae	Unassigned	0.085	0.052	0.048	0.121	0.029	0.005	0.065	0.015	0.141	0.278	0.099	0.054	0.018	0.061	0.025	0.014	0.101	0.074	0.128	0.043	0.042	0.019
OTU1397	-0.794	8.615	0.353261	0.589357	NotSig	Bacteria	Firmicutes	Clostridia	Clostridiales	Lachnospiraceae	Unassigned	0.029	0.042	0.026	0.019	0	0	0.038	0.076	0.006	0.006	0.089	0.028	0.029	0.133	0.042	0.064	0.01	0.003	0.054	0	0.062	0.019
OTU1142	1.088	5.906	0.353345	0.589357	NotSig	Bacteria	Firmicutes	Clostridia	Clostridiales	Unassigned	Unassigned	0.002	0.001	0	0.005	0.002	0.009	0.002	0	0	0	0	0.002	0.007	0	0	0	0	0	0	0	0	0.002
OTU1248	1.243	5.667	0.355031	0.591606	NotSig	Bacteria	Candidatus_Saccharibacteria	Unassigned	Unassigned	Unassigned	Saccharibacteria_genera_incertae_sedis	0.001	0	0	0.002	0.007	0	0	0	0	0	0	0	0	0	0	0	0	0	0	0	0	0.002
OTU922	-1.105	5.642	0.356543	0.593559	NotSig	Bacteria	Elusimicrobia	Elusimicrobia	Elusimicrobiales	Elusimicrobiaceae	Elusimicrobium	0	0.001	0.002	0	0	0	0	0	0	0	0	0	0	0	0	0	0	0	0	0.002	0.005	0
OTU36	0.938	10.617	0.358103	0.59559	NotSig	Bacteria	Bacteroidetes	Unassigned	Unassigned	Unassigned	Unassigned	0.218	0.115	0.019	0.017	0	0	0.766	0.492	0.28	0.581	0.01	0.016	0.706	0	0.096	0.002	0.034	0.008	0.065	0.053	0.03	0.157
OTU1019	0.787	9.083	0.359148	0.596759	NotSig	Bacteria	Firmicutes	Clostridia	Clostridiales	Lachnospiraceae	Unassigned	0.069	0.039	0.175	0.012	0.099	0.005	0.029	0.063	0.009	0.134	0.099	0.068	0.091	0.009	0.032	0	0	0	0.117	0.004	0.055	0.085
OTU1156	1.07	5.729	0.360944	0.597887	NotSig	Bacteria	Firmicutes	Clostridia	Clostridiales	Ruminococcaceae	Unassigned	0.001	0	0.002	0.007	0	0	0	0	0	0.002	0	0.002	0.005	0	0	0	0	0	0	0	0	0
OTU1519	0.808	5.971	0.361112	0.597887	NotSig	Bacteria	Firmicutes	Clostridia	Clostridiales	Ruminococcaceae	Unassigned	0.003	0.001	0.007	0.002	0	0	0.005	0.005	0	0.004	0	0.002	0	0	0	0	0	0	0.003	0.004	0.002	0.002
OTU1287	1.084	6.133	0.361161	0.597887	NotSig	Bacteria	Unassigned	Unassigned	Unassigned	Unassigned	Unassigned	0.004	0.001	0	0.005	0	0	0.025	0	0	0	0.007	0.002	0.002	0.002	0.002	0	0	0	0	0	0.007	0
OTU80	-0.898	7.629	0.361501	0.597887	NotSig	Bacteria	Firmicutes	Erysipelotrichia	Erysipelotrichales	Erysipelotrichaceae	Faecalitalea	0.012	0.019	0.01	0.01	0.009	0.012	0.002	0.018	0	0.006	0.052	0	0	0.095	0.005	0.027	0.005	0.005	0	0	0.05	0.002
OTU1207	-0.842	9.278	0.361655	0.597887	NotSig	Bacteria	Firmicutes	Clostridia	Clostridiales	Unassigned	Unassigned	0.046	0.083	0.093	0	0.034	0	0.004	0.193	0.013	0.102	0.02	0.002	0.163	0.127	0.002	0	0.065	0.081	0.156	0.013	0.012	0.209
OTU817	0.747	8.238	0.361879	0.597887	NotSig	Bacteria	Firmicutes	Clostridia	Clostridiales	Unassigned	Unassigned	0.037	0.019	0.148	0.002	0.009	0	0.025	0.03	0.006	0.091	0.055	0.006	0.009	0.002	0.005	0.002	0.044	0.033	0.051	0.026	0.017	0.005
OTU1529	1.072	5.744	0.363115	0.598826	NotSig	Bacteria	Firmicutes	Clostridia	Clostridiales	Ruminococcaceae	Unassigned	0.001	0	0.005	0.005	0	0	0	0	0.002	0	0	0.002	0	0	0	0	0	0	0	0	0	0.005
OTU1696	0.638	9.188	0.363286	0.598826	NotSig	Bacteria	Firmicutes	Clostridia	Clostridiales	Peptostreptococcaceae	Unassigned	0.067	0.044	0.022	0.087	0.018	0.026	0.041	0.023	0.107	0.185	0.02	0.143	0.032	0.086	0.015	0	0.07	0.053	0.051	0.03	0.027	0.077
OTU10	0.824	9.116	0.363475	0.598826	NotSig	Bacteria	Spirochaetes	Spirochaetia	Spirochaetales	Spirochaetaceae	Treponema	0.067	0.038	0.053	0.148	0.063	0.117	0	0.056	0.041	0.138	0.042	0.008	0.038	0	0.037	0.002	0	0.003	0.182	0.066	0.002	0.052
OTU499	-0.657	9.652	0.365098	0.600933	NotSig	Bacteria	Bacteroidetes	Unassigned	Unassigned	Unassigned	Unassigned	0.061	0.098	0.057	0.034	0.025	0.047	0.036	0.099	0.047	0.136	0.02	0.113	0.199	0.027	0.032	0	0.337	0.193	0.048	0.038	0.022	0.08
OTU728	-0.683	12.387	0.36546	0.600963	NotSig	Bacteria	Firmicutes	Clostridia	Clostridiales	Unassigned	Unassigned	0.441	0.604	0.44	0.036	0.297	0.649	0.032	0.292	0.021	0.779	1.834	0.036	0.849	1.048	0.4	1.255	0.145	0.213	0.347	0.494	0.144	1.141
OTU1688	0.793	6.409	0.365819	0.600989	NotSig	Bacteria	Firmicutes	Clostridia	Clostridiales	Ruminococcaceae	Unassigned	0.006	0.003	0.005	0.024	0.007	0	0	0.005	0.004	0	0.005	0.006	0.002	0	0	0	0.008	0.005	0.003	0	0.002	0.009
OTU751	-0.662	10.526	0.368308	0.60451	NotSig	Bacteria	Firmicutes	Clostridia	Clostridiales	Unassigned	Unassigned	0.117	0.195	0.134	0.133	0.049	0.126	0.156	0.231	0.047	0.158	0.025	0.107	0.543	0.122	0.01	0.007	0.031	0.02	0.171	0.083	0.102	0.864
OTU603	-1.355	5.668	0.368708	0.604598	NotSig	Bacteria	Bacteroidetes	Bacteroidia	Bacteroidales	Prevotellaceae	Prevotella	0	0.001	0	0.002	0	0	0	0	0	0	0	0	0	0	0	0	0	0	0.011	0	0	0
OTU671	1.101	6.866	0.371398	0.608439	NotSig	Bacteria	Bacteroidetes	Bacteroidia	Bacteroidales	Unassigned	Unassigned	0.011	0.004	0.012	0.022	0	0.002	0.032	0	0	0.026	0	0.016	0.002	0	0	0	0	0	0.003	0.034	0	0
OTU212	1.186	7.027	0.3721	0.609017	NotSig	Bacteria	Unassigned	Unassigned	Unassigned	Unassigned	Unassigned	0.012	0.005	0	0.017	0.002	0	0	0.023	0.015	0	0	0.062	0.007	0	0	0	0	0	0	0.028	0	0.014
OTU1387	-0.754	8.622	0.373871	0.611345	NotSig	Bacteria	Firmicutes	Clostridia	Clostridiales	Clostridiaceae_1	Clostridium_sensu_stricto	0.025	0.041	0.017	0.012	0.031	0.063	0.007	0.018	0.015	0.051	0.022	0.016	0.075	0	0.027	0.007	0	0.005	0.006	0.092	0.184	0.016
OTU1566	1.164	5.901	0.375455	0.61336	NotSig	Bacteria	Synergistetes	Synergistia	Synergistales	Synergistaceae	Cloacibacillus	0.002	0.001	0.002	0	0.004	0.012	0	0	0	0	0	0	0	0	0	0.002	0	0	0	0.002	0	0.002
OTU828	0.745	7.609	0.376399	0.61397	NotSig	Bacteria	Firmicutes	Clostridia	Clostridiales	Ruminococcaceae	Unassigned	0.021	0.01	0.005	0.048	0	0	0.036	0.005	0.009	0.004	0.084	0.022	0.025	0.014	0.029	0.007	0.008	0.005	0.006	0.009	0	0.002
OTU899	1.044	5.832	0.376531	0.61397	NotSig	Bacteria	Firmicutes	Clostridia	Clostridiales	Unassigned	Unassigned	0.002	0.001	0	0.007	0.004	0	0	0	0	0	0	0.006	0.002	0	0	0	0	0	0	0.002	0	0.002
OTU300	-0.649	6.258	0.379244	0.617818	NotSig	Bacteria	Firmicutes	Negativicutes	Selenomonadales	Acidaminococcaceae	Phascolarctobacterium	0.003	0.004	0.002	0.007	0.002	0.002	0	0.008	0.002	0.002	0	0	0.005	0.007	0.002	0.002	0.01	0.003	0	0.002	0.002	0.005
OTU449	-1.414	5.895	0.379838	0.61821	NotSig	Bacteria	Bacteroidetes	Bacteroidia	Bacteroidales	Porphyromonadaceae	Unassigned	0.001	0.002	0.002	0	0.002	0	0	0.003	0	0	0	0	0	0	0	0	0	0	0	0.019	0	0
OTU1223	1.135	5.826	0.381563	0.620439	NotSig	Bacteria	Firmicutes	Clostridia	Clostridiales	Ruminococcaceae	Unassigned	0.002	0.001	0	0	0	0	0.013	0	0	0.002	0.005	0	0.005	0	0	0	0	0	0	0	0	0.002
OTU945	1.096	6.046	0.382838	0.621299	NotSig	Bacteria	Lentisphaerae	Oligosphaeria	Oligosphaerales	Oligosphaeraceae	Oligosphaera	0.003	0.001	0.002	0.002	0.002	0	0.023	0.003	0	0	0	0	0.009	0	0	0	0	0	0	0	0	0.005
OTU74	1.266	6.184	0.38309	0.621299	NotSig	Bacteria	Spirochaetes	Spirochaetia	Spirochaetales	Spirochaetaceae	Treponema	0.004	0.002	0.005	0	0.031	0	0	0	0	0	0	0.002	0.005	0	0	0	0	0	0	0.002	0	0.009
OTU891	-0.678	6.337	0.383263	0.621299	NotSig	Bacteria	Firmicutes	Clostridia	Clostridiales	Ruminococcaceae	Unassigned	0.003	0.005	0.005	0.005	0.004	0	0.002	0	0.002	0	0.005	0.006	0.014	0.007	0	0.002	0	0.005	0.003	0	0.005	0.012
OTU1355	0.636	9.359	0.383513	0.621299	NotSig	Bacteria	Firmicutes	Clostridia	Clostridiales	Ruminococcaceae	Unassigned	0.081	0.05	0.096	0.213	0.124	0	0.061	0.038	0.017	0.083	0.04	0.135	0.032	0.068	0.029	0	0.057	0.043	0.08	0.019	0.057	0.115
OTU635	0.897	6.797	0.385552	0.623696	NotSig	Bacteria	Bacteroidetes	Unassigned	Unassigned	Unassigned	Unassigned	0.01	0.005	0.036	0	0.004	0	0.018	0.008	0	0	0.035	0	0.009	0.007	0	0	0	0	0.017	0.004	0.005	0.007
OTU1314	-1.014	5.63	0.386097	0.623696	NotSig	Bacteria	Unassigned	Unassigned	Unassigned	Unassigned	Unassigned	0	0.001	0	0.002	0	0	0	0	0	0	0	0	0	0.002	0	0	0	0.005	0	0	0	0
OTU859	0.637	6.597	0.386169	0.623696	NotSig	Bacteria	Firmicutes	Clostridia	Clostridiales	Ruminococcaceae	Unassigned	0.006	0.004	0	0.005	0.009	0.005	0.005	0	0.013	0.01	0.005	0.01	0.011	0.002	0.002	0	0	0.005	0.006	0.002	0.007	0.005
OTU1203	0.691	7.026	0.386627	0.623696	NotSig	Bacteria	Firmicutes	Clostridia	Clostridiales	Ruminococcaceae	Unassigned	0.01	0.007	0.002	0.015	0	0.002	0.013	0.008	0.032	0.016	0.002	0.014	0.014	0.002	0.005	0	0.008	0	0.02	0.013	0.002	0.002
OTU29	-0.72	11.983	0.38732	0.623696	NotSig	Bacteria	Bacteroidetes	Bacteroidia	Bacteroidales	Prevotellaceae	Prevotella	0.335	0.545	0.725	0.642	0.434	0.002	0.081	0.167	0.034	0.844	0.05	0.368	0.249	0.061	0.506	0.036	0.231	0.234	3.873	0.047	0.077	0.141
OTU337	1.131	5.668	0.387378	0.623696	NotSig	Bacteria	Unassigned	Unassigned	Unassigned	Unassigned	Unassigned	0.001	0	0	0.005	0.004	0	0	0	0	0	0	0	0	0	0	0	0.003	0	0	0	0	0
OTU937	0.996	6.091	0.387491	0.623696	NotSig	Bacteria	Firmicutes	Clostridia	Clostridiales	Unassigned	Unassigned	0.003	0.002	0	0.01	0	0	0.004	0	0.013	0.004	0	0	0.002	0	0	0	0	0	0.009	0.002	0.002	0
OTU707	0.502	13.081	0.389215	0.625894	NotSig	Bacteria	Firmicutes	Clostridia	Clostridiales	Ruminococcaceae	Unassigned	1.08	0.697	1.5	0.85	0.775	1.061	1.004	0.517	0.413	1.591	2.332	0.758	0.537	0.85	0.41	0.472	0.661	0.703	1.237	1.254	0.286	0.557
OTU185	0.864	6.232	0.390083	0.626341	NotSig	Bacteria	Unassigned	Unassigned	Unassigned	Unassigned	Unassigned	0.004	0.002	0.005	0.002	0.002	0	0	0.008	0.013	0.002	0.002	0.004	0	0.016	0.002	0	0	0	0	0.002	0	0
OTU1568	-1.011	5.642	0.390854	0.626341	NotSig	Bacteria	Firmicutes	Clostridia	Clostridiales	Ruminococcaceae	Clostridium_III	0	0.001	0	0	0.002	0	0	0	0	0	0	0	0.002	0	0.002	0	0	0	0.003	0	0	0
OTU1428	0.57	7.059	0.390872	0.626341	NotSig	Bacteria	Firmicutes	Clostridia	Clostridiales	Lachnospiraceae	Howardella	0.012	0.007	0.005	0.007	0.009	0.007	0.011	0.018	0.006	0.024	0.027	0.002	0.011	0.005	0	0.007	0.018	0.005	0.014	0.002	0.002	0.007
OTU752	0.561	11.255	0.3912	0.626341	NotSig	Bacteria	Actinobacteria	Actinobacteria	Coriobacteriales	Coriobacteriaceae	Unassigned	0.306	0.193	0.313	0.32	0.261	0.185	0.195	0.145	0.22	1.09	0.166	0.163	0.224	0.237	0.017	0.032	0.122	0.221	0.088	0.568	0.135	0.284
OTU1724	0.594	10.509	0.391284	0.626341	NotSig	Bacteria	Firmicutes	Clostridia	Clostridiales	Unassigned	Unassigned	0.187	0.126	0.521	0.167	0.108	0.047	0.342	0.19	0.043	0.225	0.047	0.181	0.269	0.088	0.022	0.014	0.08	0.028	0.469	0.019	0.052	0.214
OTU1263	0.924	7.21	0.393599	0.62947	NotSig	Bacteria	Firmicutes	Clostridia	Clostridiales	Ruminococcaceae	Unassigned	0.012	0.006	0	0.005	0.002	0.066	0.023	0.003	0.015	0.004	0	0	0.002	0	0	0.007	0.003	0	0	0.009	0.032	0.012
OTU1002	0.86	5.733	0.394161	0.629793	NotSig	Bacteria	Firmicutes	Unassigned	Unassigned	Unassigned	Unassigned	0.001	0	0	0.002	0	0.002	0	0.003	0.002	0	0	0.002	0	0	0	0	0	0	0	0.002	0	0.002
OTU1181	-0.798	5.755	0.394977	0.63052	NotSig	Bacteria	Firmicutes	Clostridia	Clostridiales	Ruminococcaceae	Unassigned	0.001	0.001	0	0.002	0	0	0.002	0	0	0.002	0	0	0	0.002	0	0.002	0.003	0	0	0.002	0	0.002
OTU797	-0.709	7.084	0.395545	0.630852	NotSig	Bacteria	Firmicutes	Clostridia	Clostridiales	Ruminococcaceae	Unassigned	0.008	0.011	0.002	0.002	0	0	0	0.036	0.006	0.028	0.002	0	0.005	0.011	0.007	0.002	0.026	0.018	0.014	0.011	0.01	0.009
OTU1297	1.264	6.079	0.39859	0.635128	NotSig	Bacteria	Firmicutes	Clostridia	Clostridiales	Unassigned	Unassigned	0.003	0.001	0	0.005	0	0	0.007	0	0	0	0	0.022	0.011	0	0	0	0	0	0	0	0	0.002
OTU994	-0.973	5.625	0.400285	0.636831	NotSig	Bacteria	Firmicutes	Clostridia	Clostridiales	Unassigned	Unassigned	0	0.001	0	0.002	0	0	0	0	0	0	0	0	0.002	0	0	0	0	0	0	0.002	0	0.002
OTU411	0.751	9.175	0.400388	0.636831	NotSig	Bacteria	Bacteroidetes	Bacteroidia	Bacteroidales	Unassigned	Unassigned	0.07	0.044	0.112	0.097	0.254	0.021	0.007	0.013	0.002	0.132	0.052	0.012	0.245	0	0.007	0.014	0.01	0.003	0.023	0.004	0.007	0.131
OTU1133	-0.853	5.901	0.400786	0.636886	NotSig	Bacteria	Firmicutes	Clostridia	Clostridiales	Ruminococcaceae	Unassigned	0.001	0.002	0	0.002	0	0	0.004	0	0.002	0	0.002	0	0.009	0	0.002	0	0	0	0	0.002	0	0.007
OTU344	1.014	5.735	0.402378	0.638395	NotSig	Bacteria	Unassigned	Unassigned	Unassigned	Unassigned	Unassigned	0.001	0	0	0	0.002	0.005	0	0	0	0	0	0.004	0.002	0	0	0	0	0	0	0	0	0.002
OTU1208	-0.81	6.675	0.402467	0.638395	NotSig	Bacteria	Firmicutes	Clostridia	Clostridiales	Lachnospiraceae	Unassigned	0.005	0.007	0.007	0.002	0.004	0	0	0.015	0	0	0.015	0.002	0	0.002	0.022	0	0.005	0.005	0.028	0.002	0	0.007
OTU1746	-0.97	5.635	0.40289	0.638488	NotSig	Bacteria	Bacteroidetes	Bacteroidia	Bacteroidales	Porphyromonadaceae	Unassigned	0	0.001	0	0	0	0	0	0	0.002	0	0	0	0	0	0	0	0	0.005	0	0	0	0.002
OTU683	-0.815	7.873	0.403985	0.639337	NotSig	Bacteria	Bacteroidetes	Bacteroidia	Bacteroidales	Porphyromonadaceae	Unassigned	0.012	0.023	0.022	0.007	0.022	0.054	0.009	0	0.006	0.002	0.002	0	0.023	0.05	0.081	0	0.005	0.013	0	0	0.025	0.031
OTU34	0.687	11.984	0.404158	0.639337	NotSig	Bacteria	Bacteroidetes	Bacteroidia	Bacteroidales	Prevotellaceae	Prevotella	0.533	0.274	0.115	3.382	0.741	0.349	0.041	0.18	0.088	0.179	0.092	0.167	0.195	0.676	1.226	0.052	0.158	0.122	0.028	0.017	0.149	0.12
OTU1461	0.873	6.582	0.405211	0.640423	NotSig	Bacteria	Firmicutes	Clostridia	Clostridiales	Lachnospiraceae	Anaerostipes	0.007	0.004	0	0.031	0	0.002	0.016	0	0.009	0.012	0	0	0.002	0	0	0.002	0.005	0.003	0.014	0.009	0	0
OTU1353	1.186	5.764	0.406039	0.641032	NotSig	Bacteria	Unassigned	Unassigned	Unassigned	Unassigned	Unassigned	0.001	0	0	0.002	0	0	0	0	0.009	0	0	0	0.002	0	0	0	0	0	0	0.002	0	0
OTU760	0.968	6.08	0.406329	0.641032	NotSig	Bacteria	Tenericutes	Mollicutes	Anaeroplasmatales	Anaeroplasmataceae	Anaeroplasma	0.003	0.001	0	0.005	0	0.007	0	0	0.011	0.002	0	0.002	0	0	0	0	0.003	0.008	0	0	0	0.005
OTU781	-0.697	6.331	0.406956	0.641442	NotSig	Bacteria	Firmicutes	Clostridia	Clostridiales	Lachnospiraceae	Clostridium_XlVb	0.003	0.005	0.012	0.002	0.002	0	0.002	0	0.002	0.004	0.002	0.002	0.002	0	0.002	0	0.008	0.003	0.026	0.002	0.005	0
OTU946	1.107	5.763	0.407385	0.641539	NotSig	Bacteria	Unassigned	Unassigned	Unassigned	Unassigned	Unassigned	0.001	0.001	0	0	0	0	0.009	0	0	0.004	0	0.002	0	0	0	0	0	0	0.006	0	0	0
OTU1022	-0.949	5.622	0.408653	0.642835	NotSig	Bacteria	Firmicutes	Clostridia	Clostridiales	Ruminococcaceae	Unassigned	0	0.001	0	0.002	0	0	0	0	0	0	0	0	0.005	0	0	0	0	0	0	0.002	0	0
OTU712	0.643	10.074	0.408943	0.642835	NotSig	Bacteria	Firmicutes	Clostridia	Clostridiales	Ruminococcaceae	Unassigned	0.135	0.089	0.053	0.111	0.072	0	0.186	0.041	0.122	0.213	0.287	0.27	0.26	0.014	0.027	0.005	0.013	0.025	0.162	0.043	0.022	0.322
OTU1413	0.671	6.807	0.410161	0.644171	NotSig	Bacteria	Firmicutes	Clostridia	Clostridiales	Ruminococcaceae	Unassigned	0.008	0.005	0.007	0.01	0	0	0.007	0.003	0.017	0.004	0.005	0.03	0.002	0.007	0	0.002	0.003	0.003	0.003	0.021	0.002	0.005
OTU1106	0.597	7.43	0.410866	0.644471	NotSig	Bacteria	Cyanobacteria/Chloroplast	Chloroplast	Unassigned	Chloroplast	Streptophyta	0.015	0.01	0.012	0.031	0.004	0	0.002	0.013	0.047	0.012	0.005	0.024	0.009	0.005	0.012	0.005	0.01	0.013	0.009	0.004	0.007	0.026
OTU1	0.746	13.075	0.41109	0.644471	NotSig	Bacteria	Firmicutes	Bacilli	Lactobacillales	Lactobacillaceae	Lactobacillus	0.98	0.59	0.151	0.869	0.186	0.009	0.02	0.063	3.797	0.01	0.439	4.255	0.487	0.147	0.523	0.173	0.086	0.175	0.1	2.237	1.096	0.874
OTU274	1.024	6.802	0.412078	0.645441	NotSig	Bacteria	Firmicutes	Bacilli	Lactobacillales	Lactobacillaceae	Lactobacillus	0.008	0.004	0.002	0.002	0.002	0	0	0	0.039	0	0	0.032	0	0.002	0.002	0	0	0	0	0.024	0.007	0.002
OTU434	0.889	7.485	0.412891	0.646136	NotSig	Bacteria	Bacteroidetes	Unassigned	Unassigned	Unassigned	Unassigned	0.017	0.009	0	0	0	0.002	0.016	0	0.034	0	0.012	0.103	0.002	0.009	0.002	0	0.036	0.025	0	0.009	0.005	0.005
OTU1228	-0.643	7.437	0.41335	0.646275	NotSig	Bacteria	Firmicutes	Clostridia	Clostridiales	Lachnospiraceae	Unassigned	0.011	0.016	0.038	0.017	0.004	0	0.005	0.013	0.002	0.01	0.015	0.008	0	0.009	0.017	0.009	0.01	0.013	0.085	0.002	0.012	0.002
OTU629	-0.654	9.112	0.413756	0.646331	NotSig	Bacteria	Bacteroidetes	Bacteroidia	Bacteroidales	Porphyromonadaceae	Unassigned	0.042	0.067	0.06	0.128	0.018	0	0.03	0.043	0.039	0.016	0.012	0.074	0.027	0.034	0.052	0.011	0.008	0.008	0.463	0.024	0.027	0.021
OTU293	0.599	10.121	0.414227	0.64649	NotSig	Bacteria	Unassigned	Unassigned	Unassigned	Unassigned	Unassigned	0.126	0.087	0.098	0.189	0.07	0.007	0.022	0.081	0.368	0.158	0.052	0.213	0.22	0.02	0.032	0.011	0.026	0.041	0.074	0.222	0.025	0.197
OTU772	0.658	11.59	0.415342	0.647653	NotSig	Bacteria	Firmicutes	Clostridia	Clostridiales	Unassigned	Unassigned	0.406	0.237	0.251	0.983	0.002	0.002	0.131	0.322	0.081	0.089	0.714	1.489	0.115	0.287	0.285	0.034	0.588	0.546	0.316	0.073	0.035	0.087
OTU796	0.606	11.547	0.416473	0.648095	NotSig	Bacteria	Firmicutes	Clostridia	Clostridiales	Ruminococcaceae	Unassigned	0.396	0.214	0.189	1.767	0.117	0.26	0.032	0.01	0.06	0.499	0.696	0.326	0.22	0.014	0.113	0.393	0.422	0.274	0.267	0.128	0.227	0.08
OTU294	0.871	7.735	0.416678	0.648095	NotSig	Bacteria	Firmicutes	Unassigned	Unassigned	Unassigned	Unassigned	0.023	0.012	0.005	0.107	0	0	0.002	0	0.034	0.018	0.04	0.03	0.018	0	0	0	0.003	0	0.011	0.053	0.002	0.028
OTU1650	-0.936	5.646	0.416767	0.648095	NotSig	Bacteria	Firmicutes	Clostridia	Clostridiales	Clostridiaceae_1	Clostridium_sensu_stricto	0	0.001	0	0	0	0.002	0	0	0	0	0	0	0	0	0	0	0	0.005	0.003	0	0	0
OTU328	-1.169	6.237	0.417109	0.648095	NotSig	Bacteria	Firmicutes	Unassigned	Unassigned	Unassigned	Unassigned	0.002	0.005	0	0	0	0	0	0	0	0.004	0.017	0	0.002	0.002	0	0	0.01	0.03	0	0	0	0
OTU123	0.785	8.01	0.419877	0.651313	NotSig	Bacteria	Firmicutes	Bacilli	Lactobacillales	Lactobacillaceae	Lactobacillus	0.031	0.015	0.081	0.002	0.009	0	0.002	0.084	0.002	0.041	0.092	0	0	0.005	0.01	0.018	0.026	0.066	0.003	0	0.01	0.009
OTU589	0.95	8.146	0.419926	0.651313	NotSig	Bacteria	Bacteroidetes	Bacteroidia	Bacteroidales	Unassigned	Unassigned	0.033	0.017	0.022	0.128	0.099	0.012	0	0.005	0	0.03	0.022	0.016	0.061	0	0	0	0	0	0	0.064	0	0.04
OTU528	-0.969	6.235	0.422399	0.654063	NotSig	Bacteria	Bacteroidetes	Bacteroidia	Bacteroidales	Prevotellaceae	Prevotella	0.002	0.004	0.007	0.007	0.007	0	0	0	0	0	0	0	0.005	0	0.007	0.002	0.003	0	0.026	0	0	0
OTU1266	-0.933	7.151	0.422643	0.654063	NotSig	Bacteria	Firmicutes	Clostridia	Clostridiales	Unassigned	Unassigned	0.008	0.012	0.002	0.005	0.002	0	0.005	0	0	0.002	0.062	0	0	0.068	0	0.025	0	0.003	0.003	0.002	0.02	0
OTU1071	0.579	10.935	0.422821	0.654063	NotSig	Bacteria	Firmicutes	Clostridia	Clostridiales	Unassigned	Unassigned	0.246	0.147	0.141	0.392	0.103	0.066	0.348	0.586	0.013	0.035	0.05	0.724	0.136	0.086	0.086	0.032	0.041	0.058	0.119	0.515	0.157	0.237
OTU643	-0.896	5.913	0.42402	0.655338	NotSig	Bacteria	Bacteroidetes	Unassigned	Unassigned	Unassigned	Unassigned	0.001	0.002	0	0	0	0	0.002	0	0	0	0.01	0	0.002	0.005	0	0	0	0.003	0.009	0.004	0	0
OTU1620	-0.899	7.366	0.424471	0.655455	NotSig	Bacteria	Firmicutes	Clostridia	Clostridiales	Clostridiaceae_1	Clostridium_sensu_stricto	0.008	0.014	0.005	0.002	0	0.002	0.002	0	0.028	0.026	0	0.014	0	0	0.002	0	0.008	0.008	0.011	0.109	0	0.002
OTU928	0.725	6.079	0.427484	0.659525	NotSig	Bacteria	Firmicutes	Clostridia	Clostridiales	Christensenellaceae	Christensenella	0.003	0.001	0.002	0.002	0.004	0.009	0	0	0.002	0.002	0.002	0.002	0	0	0	0.002	0	0.003	0	0.002	0.007	0
OTU1374	1.064	6.039	0.429021	0.661313	NotSig	Bacteria	Firmicutes	Clostridia	Clostridiales	Lachnospiraceae	Unassigned	0.003	0.001	0	0.002	0	0	0.009	0	0.002	0	0	0.016	0	0	0	0	0	0	0.006	0.006	0	0
OTU552	-0.883	5.706	0.429727	0.661818	NotSig	Bacteria	Bacteroidetes	Bacteroidia	Bacteroidales	Prevotellaceae	Prevotella	0	0.001	0.002	0.002	0	0	0	0	0	0	0	0	0.002	0.002	0.005	0	0	0	0	0	0	0
OTU203	-0.741	5.768	0.430206	0.661842	NotSig	Bacteria	Unassigned	Unassigned	Unassigned	Unassigned	Unassigned	0.001	0.001	0	0	0	0	0	0.003	0	0	0.002	0.002	0	0.002	0	0.002	0	0.003	0	0	0.002	0.002
OTU1443	0.607	6.868	0.430833	0.661842	NotSig	Bacteria	Firmicutes	Clostridia	Clostridiales	Lachnospiraceae	Unassigned	0.01	0.006	0.024	0.012	0.009	0	0.009	0.003	0.002	0.026	0.012	0.002	0.009	0.005	0	0	0.01	0.013	0.017	0	0.005	0.002
OTU1702	0.717	5.869	0.430879	0.661842	NotSig	Bacteria	Firmicutes	Clostridia	Clostridiales	Ruminococcaceae	Unassigned	0.002	0.001	0	0.005	0.002	0	0.005	0	0	0.002	0.005	0	0	0.002	0	0	0.003	0.003	0.003	0	0	0
OTU787	0.988	5.635	0.431595	0.66236	NotSig	Bacteria	Unassigned	Unassigned	Unassigned	Unassigned	Unassigned	0.001	0	0	0.002	0.002	0.002	0	0	0	0	0	0	0.002	0	0	0	0	0	0	0	0	0
OTU588	-0.885	5.619	0.43224	0.662767	NotSig	Bacteria	Bacteroidetes	Bacteroidia	Bacteroidales	Prevotellaceae	Prevotella	0	0.001	0	0	0	0	0	0.003	0	0	0	0	0.005	0	0	0	0	0	0	0	0	0.002
OTU1466	0.59	6.115	0.432691	0.662879	NotSig	Bacteria	Firmicutes	Clostridia	Clostridiales	Ruminococcaceae	Unassigned	0.003	0.002	0.002	0	0.002	0.002	0.007	0	0.002	0.004	0.007	0.004	0.002	0	0	0	0.003	0.003	0.003	0.004	0	0.005
OTU57	0.921	7.191	0.433561	0.663377	NotSig	Bacteria	Spirochaetes	Spirochaetia	Spirochaetales	Spirochaetaceae	Treponema	0.015	0.007	0.007	0	0.025	0	0.016	0.003	0	0.087	0.012	0	0.023	0	0.007	0	0	0	0	0.011	0	0.031
OTU1095	-0.765	9.001	0.434046	0.663377	NotSig	Bacteria	Actinobacteria	Actinobacteria	Coriobacteriales	Coriobacteriaceae	Senegalimassilia	0.039	0.052	0.002	0.022	0.002	0.012	0.203	0.101	0	0	0.05	0	0.005	0.038	0.015	0.107	0.041	0.114	0.02	0.004	0.174	0.005
OTU896	0.926	5.82	0.434155	0.663377	NotSig	Bacteria	Lentisphaerae	Oligosphaeria	Oligosphaerales	Oligosphaeraceae	Oligosphaera	0.002	0.001	0	0	0	0.005	0.009	0	0	0	0.002	0	0.002	0	0	0	0	0.003	0	0.002	0	0
OTU1541	0.944	5.639	0.43797	0.668622	NotSig	Bacteria	Actinobacteria	Actinobacteria	Coriobacteriales	Coriobacteriaceae	Collinsella	0.001	0	0	0	0	0	0.005	0.003	0	0	0	0	0	0	0	0	0	0.003	0	0	0	0
OTU483	-0.864	5.802	0.440063	0.671231	NotSig	Bacteria	Bacteroidetes	Bacteroidia	Bacteroidales	Unassigned	Unassigned	0.001	0.002	0	0	0	0	0.004	0	0	0.004	0	0	0.009	0	0	0	0.003	0.003	0	0	0	0.002
OTU1145	1.082	5.905	0.44046	0.67125	NotSig	Bacteria	Firmicutes	Clostridia	Clostridiales	Unassigned	Unassigned	0.002	0.001	0	0.015	0	0	0	0	0.004	0	0	0.004	0.007	0	0	0	0	0	0	0.002	0	0
OTU1102	-0.544	8.376	0.441147	0.671662	NotSig	Bacteria	Firmicutes	Clostridia	Clostridiales	Ruminococcaceae	Oscillibacter	0.025	0.036	0.065	0.007	0.025	0.023	0.007	0.03	0.002	0.053	0.03	0.01	0.063	0.097	0.007	0.025	0.041	0.02	0.028	0.002	0.01	0.061
OTU52	-0.541	9.287	0.441785	0.671662	NotSig	Bacteria	Spirochaetes	Spirochaetia	Spirochaetales	Spirochaetaceae	Treponema	0.048	0.068	0.019	0.08	0.103	0.033	0.004	0.053	0.019	0.026	0.027	0.113	0.084	0.029	0.039	0.007	0.018	0.071	0.031	0.186	0.065	0.146
OTU1536	-0.86	5.622	0.442267	0.671662	NotSig	Bacteria	Firmicutes	Clostridia	Clostridiales	Ruminococcaceae	Unassigned	0	0.001	0	0	0	0	0	0	0.002	0	0	0	0.005	0	0	0	0	0	0	0	0	0.002
OTU666	-0.86	5.622	0.442267	0.671662	NotSig	Bacteria	Bacteroidetes	Bacteroidia	Bacteroidales	Porphyromonadaceae	Unassigned	0	0.001	0	0	0	0	0	0	0.002	0	0	0	0.005	0	0	0	0	0	0	0	0	0.002
OTU975	1.232	5.677	0.442923	0.672074	NotSig	Bacteria	Firmicutes	Clostridia	Clostridiales	Eubacteriaceae	Eubacterium	0.001	0	0	0	0.009	0	0	0	0	0	0	0	0	0	0	0	0	0	0	0.002	0	0
OTU1279	0.489	7.149	0.444209	0.672868	NotSig	Bacteria	Firmicutes	Clostridia	Clostridiales	Lachnospiraceae	Unassigned	0.012	0.008	0.014	0.034	0.009	0.005	0.007	0	0.009	0.016	0.025	0.004	0.007	0.007	0.005	0.007	0.008	0.01	0.014	0.009	0.007	0.005
OTU1148	-0.659	5.823	0.444216	0.672868	NotSig	Bacteria	Firmicutes	Clostridia	Clostridiales	Unassigned	Unassigned	0.001	0.001	0	0	0	0	0.002	0.003	0.002	0	0.002	0	0.002	0.002	0	0.002	0	0	0.003	0.002	0.002	0
OTU1110	-0.547	9.18	0.444816	0.67287	NotSig	Bacteria	Firmicutes	Clostridia	Clostridiales	Ruminococcaceae	Unassigned	0.049	0.066	0.086	0.029	0.027	0.005	0.052	0.162	0.006	0.041	0.057	0.022	0.032	0.072	0.017	0.002	0.156	0.147	0.131	0.062	0.022	0.019
OTU504	-0.934	5.873	0.444987	0.67287	NotSig	Bacteria	Bacteroidetes	Bacteroidia	Bacteroidales	Prevotellaceae	Prevotella	0.001	0.002	0	0	0	0	0	0.005	0	0	0.005	0	0	0.011	0.002	0	0.003	0	0	0	0.002	0
OTU1477	0.624	6.237	0.445685	0.673343	NotSig	Bacteria	Firmicutes	Clostridia	Clostridiales	Ruminococcaceae	Clostridium_IV	0.004	0.002	0.002	0.01	0.002	0	0	0.008	0	0.014	0.002	0.004	0.009	0.002	0	0.002	0	0.003	0.003	0.002	0.002	0
OTU565	-0.739	5.926	0.449584	0.678646	NotSig	Bacteria	Bacteroidetes	Bacteroidia	Bacteroidales	Prevotellaceae	Prevotella	0.001	0.002	0.002	0.002	0.004	0	0	0.003	0	0	0	0	0.005	0	0.007	0	0.003	0	0.003	0	0	0.002
OTU1004	-0.832	5.706	0.451891	0.68154	NotSig	Bacteria	Unassigned	Unassigned	Unassigned	Unassigned	Unassigned	0	0.001	0.002	0	0.002	0	0	0	0	0	0	0	0	0	0	0	0	0.003	0.006	0	0.002	0
OTU866	0.797	6.867	0.452686	0.682151	NotSig	Bacteria	Firmicutes	Unassigned	Unassigned	Unassigned	Unassigned	0.008	0.005	0	0.005	0	0.021	0.005	0	0.036	0	0.007	0.004	0	0	0	0.005	0.021	0.013	0.003	0.006	0	0.002
OTU1730	0.493	6.975	0.453826	0.68328	NotSig	Bacteria	Firmicutes	Clostridia	Clostridiales	Unassigned	Unassigned	0.009	0.007	0.019	0.005	0.009	0.019	0.004	0.005	0.011	0.018	0.002	0.002	0.005	0.005	0.005	0.002	0.008	0.013	0.006	0.004	0.007	0.012
OTU1055	0.494	9.653	0.455808	0.685674	NotSig	Bacteria	Firmicutes	Clostridia	Clostridiales	Ruminococcaceae	Unassigned	0.09	0.067	0.079	0.056	0.094	0.061	0.136	0.03	0.122	0.177	0.05	0.099	0.149	0.045	0.029	0.009	0.01	0.038	0.085	0.062	0.015	0.23
OTU902	-0.862	5.858	0.458877	0.689696	NotSig	Bacteria	Firmicutes	Clostridia	Clostridiales	Ruminococcaceae	Unassigned	0.001	0.002	0.002	0	0	0	0	0	0.002	0	0	0.004	0.007	0.005	0	0	0	0	0	0.006	0	0
OTU964	0.711	5.826	0.46161	0.693208	NotSig	Bacteria	Firmicutes	Clostridia	Clostridiales	Unassigned	Unassigned	0.002	0.001	0.002	0	0.004	0	0	0	0.002	0.004	0.002	0	0	0	0	0.002	0.003	0	0	0	0.002	0
OTU793	-0.502	8.881	0.463863	0.695993	NotSig	Bacteria	Firmicutes	Clostridia	Clostridiales	Ruminococcaceae	Unassigned	0.036	0.052	0.026	0.051	0.011	0.087	0.007	0.038	0.017	0.051	0.069	0.002	0.07	0.086	0.005	0.018	0.08	0.053	0.028	0.028	0.062	0.085
OTU1304	0.905	6.778	0.465569	0.697954	NotSig	Bacteria	Unassigned	Unassigned	Unassigned	Unassigned	Unassigned	0.009	0.004	0.012	0	0	0.002	0.054	0	0.013	0.006	0.002	0	0	0.007	0	0	0	0	0	0.028	0.005	0
OTU1194	0.565	7.907	0.466088	0.698133	NotSig	Bacteria	Firmicutes	Clostridia	Clostridiales	Lachnospiraceae	Unassigned	0.027	0.015	0.074	0.107	0.011	0	0.011	0.015	0.006	0.004	0.035	0.004	0.005	0.023	0.007	0.018	0.023	0.01	0.04	0.006	0.017	0.002
OTU111	0.663	8.15	0.466914	0.698772	NotSig	Bacteria	Firmicutes	Negativicutes	Selenomonadales	Veillonellaceae	Selenomonas	0.033	0.019	0.105	0.002	0.011	0.028	0.043	0.01	0	0.073	0.05	0.004	0	0.07	0.025	0	0.034	0.046	0.003	0.002	0.002	0.005
OTU880	-0.613	6.628	0.467936	0.699703	NotSig	Bacteria	Firmicutes	Clostridia	Clostridiales	Ruminococcaceae	Unassigned	0.005	0.007	0.01	0.012	0.002	0.002	0.004	0.015	0	0.002	0	0	0.002	0.029	0.007	0	0.01	0.005	0.006	0	0.005	0.002
OTU1141	0.669	5.947	0.469318	0.701084	NotSig	Bacteria	Cyanobacteria/Chloroplast	Chloroplast	Unassigned	Chloroplast	Streptophyta	0.002	0.001	0.002	0.007	0	0	0	0.008	0.002	0.002	0	0.002	0	0	0	0	0	0.003	0.006	0	0.002	0.002
OTU853	0.552	8.11	0.469662	0.701084	NotSig	Bacteria	Firmicutes	Unassigned	Unassigned	Unassigned	Unassigned	0.029	0.017	0.017	0.068	0.018	0.054	0.029	0.005	0.004	0.02	0.077	0	0.011	0.016	0.005	0.043	0.01	0.008	0.034	0.009	0.027	0.005
OTU1522	0.981	5.841	0.470188	0.701271	NotSig	Bacteria	Firmicutes	Clostridia	Clostridiales	Ruminococcaceae	Unassigned	0.002	0.001	0	0.012	0.002	0	0	0	0.002	0	0	0.002	0	0	0	0	0	0	0.009	0	0	0
OTU941	0.662	5.937	0.470838	0.701541	NotSig	Bacteria	Firmicutes	Clostridia	Clostridiales	Ruminococcaceae	Unassigned	0.002	0.001	0.01	0.005	0.002	0	0.002	0	0	0	0	0.004	0.002	0	0	0	0.003	0	0	0.002	0.002	0.002
OTU1230	0.954	5.945	0.471172	0.701541	NotSig	Bacteria	Firmicutes	Clostridia	Clostridiales	Ruminococcaceae	Unassigned	0.002	0.001	0.002	0.005	0	0	0	0	0	0	0	0.016	0.002	0	0	0.002	0.005	0	0	0	0	0
OTU718	0.579	11.181	0.471812	0.701896	NotSig	Bacteria	Firmicutes	Clostridia	Clostridiales	Unassigned	Unassigned	0.297	0.161	0.187	0.002	0.085	0.44	0.723	0.048	0.004	0.648	0.828	0.004	0.127	0.158	0.076	0.354	0.163	0.135	0.117	0.308	0.08	0.094
OTU489	0.944	5.725	0.473874	0.704364	NotSig	Bacteria	Bacteroidetes	Bacteroidia	Bacteroidales	Bacteroidaceae	Bacteroides	0.001	0	0	0.005	0.004	0	0	0	0.002	0	0	0	0	0	0	0	0	0	0	0	0	0.005
OTU441	0.577	7.396	0.475075	0.705305	NotSig	Bacteria	Bacteroidetes	Bacteroidia	Bacteroidales	Prevotellaceae	Prevotella	0.015	0.01	0.024	0.031	0.029	0	0	0.005	0.023	0.016	0.007	0.016	0.009	0.027	0.002	0.002	0.031	0.018	0.003	0	0.002	0.007
OTU1146	-0.513	9.901	0.475626	0.705305	NotSig	Bacteria	Firmicutes	Clostridia	Clostridiales	Lachnospiraceae	Unassigned	0.082	0.11	0.187	0.104	0.13	0.021	0.072	0.104	0.002	0.053	0.074	0.068	0.041	0.194	0.034	0.043	0.355	0.14	0.208	0.006	0.065	0.014
OTU744	0.497	11.796	0.47595	0.705305	NotSig	Bacteria	Firmicutes	Clostridia	Clostridiales	Clostridiaceae_1	Clostridium_sensu_stricto	0.434	0.295	0.187	0.16	0.211	0.4	0.036	0.54	0.361	1.77	0.367	0.308	0.091	0.133	0.13	0.009	0.425	0.48	0.589	0.22	0.653	0.216
OTU180	1.246	6.197	0.476121	0.705305	NotSig	Bacteria	Unassigned	Unassigned	Unassigned	Unassigned	Unassigned	0.004	0.002	0	0.002	0	0	0	0	0	0	0	0.038	0	0	0	0	0	0	0.006	0	0	0.012
OTU832	0.672	8.678	0.480902	0.711784	NotSig	Bacteria	Firmicutes	Clostridia	Clostridiales	Unassigned	Unassigned	0.051	0.029	0.041	0.005	0.052	0.009	0.084	0.013	0.004	0.014	0.265	0.022	0.143	0	0	0.03	0.003	0.003	0	0.028	0.002	0.085
OTU1131	0.545	6.244	0.481501	0.712067	NotSig	Bacteria	Firmicutes	Clostridia	Clostridiales	Ruminococcaceae	Butyricicoccus	0.004	0.002	0	0.015	0.002	0	0.005	0.003	0.006	0.002	0	0.006	0	0.002	0.002	0	0.003	0.003	0.006	0.002	0.002	0.005
OTU1056	0.856	5.626	0.482006	0.712212	NotSig	Bacteria	Firmicutes	Clostridia	Clostridiales	Ruminococcaceae	Unassigned	0.001	0	0	0	0	0	0	0	0.004	0.002	0	0	0	0	0	0	0	0	0	0	0	0.002
OTU1259	-0.491	8.939	0.483478	0.713783	NotSig	Bacteria	Firmicutes	Clostridia	Clostridiales	Unassigned	Unassigned	0.04	0.055	0.019	0.046	0.02	0	0.032	0.025	0.021	0.022	0.116	0.101	0.036	0.097	0.017	0.025	0.062	0.061	0.151	0.009	0.015	0.077
OTU1199	-0.537	10.156	0.48394	0.713862	NotSig	Bacteria	Firmicutes	Clostridia	Clostridiales	Lachnospiraceae	Unassigned	0.09	0.121	0.091	0.017	0.007	0.246	0.002	0.183	0.004	0.045	0.186	0.117	0.045	0.24	0.064	0.12	0.098	0.142	0.023	0.297	0.075	0.103
OTU1627	0.846	5.624	0.484699	0.71438	NotSig	Bacteria	Firmicutes	Clostridia	Clostridiales	Lachnospiraceae	Unassigned	0.001	0	0	0.005	0	0	0	0.003	0	0	0	0	0	0	0	0	0	0	0	0	0	0.002
OTU480	1.108	6.546	0.485223	0.714526	NotSig	Bacteria	Bacteroidetes	Bacteroidia	Bacteroidales	Bacteroidaceae	Bacteroides	0.005	0.003	0	0.002	0	0.052	0	0	0	0	0	0	0.002	0	0	0.005	0	0	0	0.002	0.017	0
OTU170	-0.944	6.28	0.485616	0.714526	NotSig	Bacteria	Unassigned	Unassigned	Unassigned	Unassigned	Unassigned	0.002	0.004	0	0	0	0	0	0	0.017	0	0	0	0	0	0.002	0	0.013	0.008	0	0.002	0.015	0.002
OTU1284	-1.038	6.072	0.486153	0.714715	NotSig	Bacteria	Firmicutes	Clostridia	Clostridiales	Ruminococcaceae	Ruminococcus	0.001	0.003	0	0	0	0.009	0	0.003	0	0	0	0	0.014	0	0	0	0	0	0	0	0.01	0.009
OTU32	-0.479	12.279	0.488243	0.717183	NotSig	Bacteria	Bacteroidetes	Bacteroidia	Bacteroidales	Prevotellaceae	Prevotella	0.432	0.572	0.923	0.322	0.366	0.562	0.69	0.774	0.03	0.304	0.072	0.278	1.759	0.904	0.779	0.325	0.456	0.213	0.128	0.028	0.683	0.441
OTU1659	0.529	9.25	0.489317	0.718158	NotSig	Bacteria	Firmicutes	Clostridia	Clostridiales	Unassigned	Unassigned	0.066	0.046	0.012	0.036	0	0.028	0.095	0.003	0.212	0.12	0.121	0.028	0.134	0.029	0.015	0.039	0.023	0.018	0.034	0.051	0.042	0.077
OTU782	0.674	6.114	0.491638	0.720959	NotSig	Bacteria	Firmicutes	Clostridia	Clostridiales	Unassigned	Unassigned	0.003	0.002	0	0.005	0.004	0.012	0.002	0.003	0	0.002	0	0.002	0.011	0	0	0	0	0	0.003	0.002	0.002	0
OTU697	-0.526	7.843	0.492618	0.721124	NotSig	Bacteria	Fibrobacteres	Fibrobacteria	Fibrobacterales	Fibrobacteraceae	Fibrobacter	0.015	0.021	0.01	0.017	0.007	0.044	0.011	0.013	0.004	0.02	0.002	0.02	0.048	0	0.049	0.005	0.005	0.003	0.031	0.015	0.01	0.049
OTU1006	0.823	5.614	0.492949	0.721124	NotSig	Bacteria	Firmicutes	Clostridia	Clostridiales	Unassigned	Unassigned	0.001	0	0	0	0	0	0.002	0.003	0	0	0	0.002	0.002	0	0	0	0	0	0	0	0	0
OTU1074	0.667	8.909	0.493146	0.721124	NotSig	Bacteria	Firmicutes	Clostridia	Clostridiales	Ruminococcaceae	Unassigned	0.056	0.032	0.273	0.005	0.157	0.005	0.025	0.013	0.034	0.018	0.027	0.004	0.059	0.005	0.002	0.002	0	0.003	0.011	0.192	0	0.045
OTU1219	0.832	5.64	0.493401	0.721124	NotSig	Bacteria	Firmicutes	Clostridia	Clostridiales	Ruminococcaceae	Oscillibacter	0.001	0	0	0.002	0	0.002	0	0	0	0	0	0.002	0	0	0	0	0	0	0	0	0.002	0
OTU906	0.68	5.976	0.495162	0.722686	NotSig	Bacteria	Firmicutes	Clostridia	Clostridiales	Unassigned	Unassigned	0.002	0.001	0.002	0	0	0	0	0.003	0.004	0.006	0.01	0	0	0	0	0.002	0	0	0.006	0.002	0.002	0
OTU72	0.856	5.795	0.495296	0.722686	NotSig	Bacteria	Unassigned	Unassigned	Unassigned	Unassigned	Unassigned	0.002	0.001	0	0.005	0.004	0	0	0	0	0.004	0	0.002	0	0	0	0	0	0	0	0	0	0.007
OTU1049	0.862	5.7	0.496626	0.724022	NotSig	Bacteria	Firmicutes	Clostridia	Clostridiales	Unassigned	Unassigned	0.001	0	0	0.007	0	0	0.002	0	0	0	0	0.002	0.005	0	0	0	0	0	0	0	0	0
OTU315	0.648	6.964	0.498586	0.725789	NotSig	Bacteria	Unassigned	Unassigned	Unassigned	Unassigned	Unassigned	0.01	0.006	0	0.027	0	0	0	0.02	0.024	0.002	0.01	0.016	0.005	0.011	0	0.002	0	0	0.026	0.004	0.01	0.007
OTU1648	-0.765	6.2	0.498999	0.725789	NotSig	Bacteria	Firmicutes	Clostridia	Clostridiales	Lachnospiraceae	Unassigned	0.002	0.004	0.002	0	0	0.002	0.005	0.01	0	0.002	0	0	0.002	0.002	0	0	0	0	0.023	0	0.012	0
OTU109	-0.578	8.445	0.499084	0.725789	NotSig	Bacteria	Unassigned	Unassigned	Unassigned	Unassigned	Unassigned	0.027	0.035	0.01	0.068	0.007	0.002	0.002	0.089	0.023	0.006	0.055	0.008	0.023	0.05	0	0.002	0.005	0.003	0.02	0.137	0.062	0.052
OTU825	-0.556	7.656	0.500001	0.726519	NotSig	Bacteria	Firmicutes	Clostridia	Clostridiales	Ruminococcaceae	Unassigned	0.014	0.02	0.053	0.036	0.002	0	0.004	0.013	0.006	0.002	0.017	0.01	0.025	0.007	0.005	0.009	0.044	0.046	0.037	0	0	0.023
OTU1234	0.813	5.633	0.501325	0.727825	NotSig	Bacteria	Firmicutes	Clostridia	Clostridiales	Ruminococcaceae	Unassigned	0.001	0	0.002	0	0	0.002	0	0	0	0.002	0	0	0	0	0	0	0	0	0	0.002	0	0
OTU1308	-0.975	6.004	0.501932	0.727825	NotSig	Bacteria	Firmicutes	Clostridia	Clostridiales	Ruminococcaceae	Unassigned	0.001	0.003	0	0.005	0	0	0	0	0	0.002	0	0.006	0.016	0	0	0	0	0	0	0	0	0.014
OTU557	-0.865	5.724	0.502149	0.727825	NotSig	Bacteria	Bacteroidetes	Bacteroidia	Bacteroidales	Prevotellaceae	Prevotella	0	0.001	0	0	0.004	0	0	0	0	0	0	0	0	0	0.005	0	0.003	0	0	0	0	0.002
OTU159	-1.032	6.472	0.50286	0.727917	NotSig	Bacteria	Firmicutes	Bacilli	Lactobacillales	Lactobacillaceae	Lactobacillus	0.003	0.005	0	0.012	0	0	0	0	0.009	0.002	0	0.004	0	0	0.044	0	0	0.003	0	0	0	0
OTU1669	0.804	5.636	0.503046	0.727917	NotSig	Bacteria	Unassigned	Unassigned	Unassigned	Unassigned	Unassigned	0.001	0	0	0	0	0	0	0.008	0	0	0	0	0	0	0	0	0	0	0	0	0.002	0
OTU1441	-0.439	7.229	0.505535	0.730402	NotSig	Bacteria	Firmicutes	Clostridia	Clostridiales	Lachnospiraceae	Unassigned	0.01	0.013	0.017	0.005	0.007	0	0.018	0.005	0.004	0.018	0.022	0.004	0.014	0.029	0.002	0.002	0.026	0.008	0.017	0.011	0.01	0.007
OTU1117	0.495	7.124	0.505929	0.730402	NotSig	Bacteria	Firmicutes	Clostridia	Clostridiales	Unassigned	Unassigned	0.012	0.008	0.014	0.022	0.007	0.007	0.009	0.01	0.004	0.014	0	0.03	0.014	0	0.005	0	0	0.01	0.009	0.011	0.012	0.019
OTU1238	-0.56	5.929	0.5061	0.730402	NotSig	Bacteria	Firmicutes	Clostridia	Clostridiales	Ruminococcaceae	Oscillibacter	0.001	0.002	0.002	0	0.004	0	0.002	0	0	0.002	0	0.002	0.005	0	0.002	0	0.003	0.005	0	0.002	0.002	0
OTU391	0.545	10	0.506434	0.730402	NotSig	Bacteria	Bacteroidetes	Bacteroidia	Bacteroidales	Bacteroidaceae	Bacteroides	0.12	0.084	0.122	0.194	0.133	0.028	0.02	0.066	0.177	0.309	0.007	0.141	0.242	0.059	0	0.002	0.093	0.043	0.08	0.194	0	0.124
OTU1293	0.578	6.43	0.507589	0.731392	NotSig	Bacteria	Firmicutes	Clostridia	Clostridiales	Lachnospiraceae	Clostridium_XlVa	0.006	0.004	0.022	0.005	0.007	0	0.007	0	0	0.004	0.01	0.002	0.007	0	0	0	0.003	0.003	0.017	0	0.002	0.005
OTU1269	0.616	6.784	0.507957	0.731392	NotSig	Bacteria	Firmicutes	Clostridia	Clostridiales	Unassigned	Unassigned	0.008	0.006	0.002	0.007	0	0.005	0.013	0.003	0.023	0.018	0	0.008	0.018	0.005	0.002	0	0	0	0.023	0	0	0.009
OTU1339	-0.471	10.422	0.509175	0.732542	NotSig	Bacteria	Firmicutes	Clostridia	Clostridiales	Lachnospiraceae	Unassigned	0.123	0.146	0.265	0.114	0.112	0.002	0.183	0.304	0.039	0.126	0.052	0.032	0.027	0.325	0.165	0.109	0.14	0.254	0.091	0.026	0.309	0.019
OTU1652	-0.995	5.97	0.510053	0.733201	NotSig	Bacteria	Firmicutes	Clostridia	Clostridiales	Clostridiaceae_1	Clostridium_sensu_stricto	0.001	0.002	0	0.002	0	0	0	0	0.006	0.002	0	0	0	0.002	0	0	0	0	0	0.019	0	0
OTU476	0.844	6.207	0.510665	0.733478	NotSig	Bacteria	Bacteroidetes	Bacteroidia	Bacteroidales	Prevotellaceae	Prevotella	0.004	0.002	0.005	0.022	0.007	0	0.002	0	0	0	0	0.006	0	0	0	0	0	0	0.009	0.011	0	0
OTU1610	0.782	5.63	0.511763	0.734452	NotSig	Bacteria	Firmicutes	Clostridia	Clostridiales	Ruminococcaceae	Unassigned	0.001	0	0	0.005	0	0	0	0.003	0	0	0	0	0	0	0	0	0.003	0	0	0	0	0
OTU348	0.783	5.634	0.512785	0.735314	NotSig	Bacteria	Unassigned	Unassigned	Unassigned	Unassigned	Unassigned	0.001	0	0	0	0.004	0	0	0	0	0.002	0	0	0	0	0	0	0	0	0	0	0.002	0
OTU1456	0.719	6.972	0.514484	0.736749	NotSig	Bacteria	Firmicutes	Clostridia	Clostridiales	Ruminococcaceae	Clostridium_IV	0.011	0.006	0.014	0.051	0	0.009	0	0.018	0	0.004	0.002	0.012	0	0	0	0	0.026	0.025	0	0	0.007	0.002
OTU1673	0.656	8.318	0.514629	0.736749	NotSig	Bacteria	Actinobacteria	Actinobacteria	Unassigned	Unassigned	Unassigned	0.034	0.024	0.033	0.012	0.074	0	0.05	0.015	0.047	0.043	0	0.06	0.043	0.016	0	0	0	0	0.097	0.024	0	0.059
OTU693	1.026	6.273	0.51623	0.737942	NotSig	Bacteria	Bacteroidetes	Bacteroidia	Bacteroidales	Porphyromonadaceae	Unassigned	0.005	0.002	0	0.024	0	0	0	0	0	0.028	0	0	0.018	0	0	0	0	0	0	0.002	0	0.002
OTU1494	0.769	5.626	0.516306	0.737942	NotSig	Bacteria	Firmicutes	Clostridia	Clostridiales	Lachnospiraceae	Unassigned	0.001	0	0	0.005	0	0	0	0	0	0	0.002	0	0	0	0	0	0	0	0	0.002	0	0
OTU838	-0.504	7.339	0.517637	0.739239	NotSig	Bacteria	Firmicutes	Clostridia	Clostridiales	Ruminococcaceae	Unassigned	0.01	0.014	0.007	0.005	0.007	0	0	0.018	0.011	0.002	0.01	0.038	0.02	0.009	0.002	0.009	0.016	0.01	0.04	0	0.02	0.016
OTU1317	-0.768	5.596	0.51848	0.739505	NotSig	Bacteria	Firmicutes	Clostridia	Clostridiales	Ruminococcaceae	Unassigned	0	0.001	0	0	0	0	0.002	0	0	0	0	0	0	0	0	0	0.005	0	0	0	0	0
OTU860	0.563	6.745	0.518794	0.739505	NotSig	Bacteria	Firmicutes	Clostridia	Clostridiales	Unassigned	Unassigned	0.007	0.005	0.019	0.002	0.013	0.012	0.002	0.008	0.008	0.004	0	0.006	0.009	0	0	0	0	0.003	0.02	0.004	0	0.019
OTU385	0.507	11.558	0.519183	0.739505	NotSig	Bacteria	Bacteroidetes	Unassigned	Unassigned	Unassigned	Unassigned	0.331	0.241	0.179	0.048	0.139	1.351	0.812	0.477	0.006	0.02	0.243	0.03	0.385	0.486	0.251	0.1	0.22	0.16	0.028	0.06	0.548	0.171
OTU1401	0.846	8.494	0.519682	0.739505	NotSig	Bacteria	Firmicutes	Clostridia	Clostridiales	Lachnospiraceae	Unassigned	0.046	0.022	0	0.01	0	0	0.43	0	0.004	0	0.017	0.002	0	0.09	0.044	0	0.041	0.02	0.003	0	0.02	0
OTU536	-0.764	5.596	0.519938	0.739505	NotSig	Bacteria	Bacteroidetes	Bacteroidia	Bacteroidales	Bacteroidaceae	Bacteroides	0	0.001	0	0	0	0	0.002	0	0	0	0	0	0	0	0	0	0	0.003	0	0	0.002	0
OTU1475	-0.668	6.322	0.521952	0.740334	NotSig	Bacteria	Firmicutes	Clostridia	Clostridiales	Lachnospiraceae	Unassigned	0.003	0.004	0	0.002	0	0	0.005	0	0.002	0.008	0.002	0.008	0	0	0	0	0.01	0.023	0	0.006	0	0.005
OTU1500	0.864	6.043	0.52198	0.740334	NotSig	Bacteria	Firmicutes	Clostridia	Clostridiales	Lachnospiraceae	Unassigned	0.003	0.001	0.005	0	0.007	0	0	0	0	0	0.002	0.014	0.005	0	0	0	0	0	0	0.009	0	0
OTU986	0.75	5.606	0.522104	0.740334	NotSig	Bacteria	Firmicutes	Clostridia	Clostridiales	Unassigned	Unassigned	0.001	0	0.002	0	0	0	0.004	0	0	0	0	0	0.002	0	0	0	0	0	0	0	0	0
OTU1169	0.755	5.614	0.522215	0.740334	NotSig	Bacteria	Synergistetes	Synergistia	Synergistales	Synergistaceae	Unassigned	0.001	0	0	0	0.002	0	0.004	0	0	0	0	0	0	0	0	0	0	0	0	0	0	0.002
OTU93	-0.528	7.712	0.5246	0.743113	NotSig	Bacteria	Proteobacteria	Betaproteobacteria	Burkholderiales	Oxalobacteraceae	Unassigned	0.014	0.02	0.019	0	0.043	0.005	0.022	0.028	0	0.014	0.01	0.002	0.054	0.043	0.032	0.014	0	0.003	0.031	0.004	0.005	0.009
OTU1470	0.564	6.134	0.525389	0.743628	NotSig	Bacteria	Firmicutes	Clostridia	Clostridiales	Ruminococcaceae	Unassigned	0.003	0.002	0.002	0.007	0	0	0	0	0.004	0.006	0.005	0.008	0	0.002	0.005	0	0	0.005	0.003	0	0	0.005
OTU1404	0.679	7.396	0.52743	0.745304	NotSig	Bacteria	Firmicutes	Clostridia	Clostridiales	Ruminococcaceae	Unassigned	0.017	0.01	0.033	0.002	0.013	0	0.007	0.005	0.004	0.077	0	0.026	0	0.056	0	0	0.01	0.023	0	0	0.01	0
OTU1711	0.5	9.459	0.527633	0.745304	NotSig	Bacteria	Firmicutes	Clostridia	Clostridiales	Unassigned	Unassigned	0.084	0.061	0.136	0.223	0.036	0.002	0.054	0.015	0.083	0.185	0.037	0.07	0.165	0.002	0.017	0.002	0.018	0.01	0.236	0.013	0.022	0.127
OTU930	-0.745	5.872	0.528033	0.745304	NotSig	Bacteria	Firmicutes	Clostridia	Clostridiales	Ruminococcaceae	Unassigned	0.001	0.002	0	0	0	0	0.004	0	0	0	0.005	0.002	0.005	0	0	0	0	0	0	0	0.005	0.009
OTU721	0.528	12.063	0.528481	0.745304	NotSig	Bacteria	Proteobacteria	Gammaproteobacteria	Aeromonadales	Succinivibrionaceae	Succinivibrio	0.465	0.339	0.33	0.126	0.436	1.993	0.052	0.266	0.058	1.155	0.079	0.155	0.294	1.268	0.875	0.05	0.259	0.084	0.341	0	0.127	0.094
OTU465	-1.013	6.307	0.528705	0.745304	NotSig	Bacteria	Bacteroidetes	Bacteroidia	Bacteroidales	Porphyromonadaceae	Unassigned	0.002	0.005	0	0	0	0	0.002	0.023	0	0	0	0	0.005	0	0	0	0	0	0.045	0	0	0.005
OTU189	0.881	6.104	0.52933	0.745583	NotSig	Bacteria	Unassigned	Unassigned	Unassigned	Unassigned	Unassigned	0.004	0.001	0	0.027	0	0	0	0.008	0	0	0.002	0	0	0	0.005	0	0	0	0	0	0.005	0.005
OTU447	-0.691	6.508	0.531697	0.748314	NotSig	Bacteria	Bacteroidetes	Bacteroidia	Bacteroidales	Porphyromonadaceae	Unassigned	0.004	0.006	0.005	0	0	0	0.027	0	0	0	0.007	0	0	0.002	0.005	0	0.005	0.008	0.02	0.015	0.002	0
OTU1706	0.686	5.763	0.533012	0.749561	NotSig	Bacteria	Actinobacteria	Actinobacteria	Coriobacteriales	Coriobacteriaceae	Unassigned	0.001	0.001	0.002	0	0.004	0	0	0	0	0.004	0	0.002	0.002	0.005	0	0	0	0	0	0	0	0
OTU471	0.555	6.412	0.535591	0.752583	NotSig	Bacteria	Bacteroidetes	Bacteroidia	Bacteroidales	Bacteroidaceae	Bacteroides	0.005	0.004	0.007	0.007	0.011	0.005	0	0.008	0.004	0.006	0	0.002	0.018	0.005	0	0	0	0	0.009	0	0	0.005
OTU1411	-0.738	5.944	0.536144	0.752755	NotSig	Bacteria	Firmicutes	Clostridia	Clostridiales	Ruminococcaceae	Clostridium_IV	0.001	0.002	0	0	0	0	0.011	0	0	0.002	0	0	0.002	0	0	0	0	0	0.003	0.002	0.01	0.005
OTU1557	0.715	5.609	0.537881	0.753406	NotSig	Bacteria	Firmicutes	Clostridia	Clostridiales	Ruminococcaceae	Unassigned	0.001	0	0.002	0	0	0	0.004	0	0	0	0	0	0	0	0	0	0	0	0	0	0	0.002
OTU1147	-0.72	6.433	0.538121	0.753406	NotSig	Bacteria	Unassigned	Unassigned	Unassigned	Unassigned	Unassigned	0.003	0.005	0.002	0	0	0.009	0	0.01	0	0	0.01	0	0	0	0.002	0.009	0.01	0.018	0	0	0.007	0
OTU1415	-0.534	7.667	0.538364	0.753406	NotSig	Bacteria	Firmicutes	Clostridia	Clostridiales	Ruminococcaceae	Ruminococcus	0.013	0.017	0.055	0	0.011	0.012	0.022	0.003	0.011	0	0.002	0.016	0.005	0.014	0.047	0.018	0	0.005	0.045	0.002	0.03	0.005
OTU116	0.509	7.895	0.53894	0.753406	NotSig	Bacteria	Spirochaetes	Spirochaetia	Spirochaetales	Spirochaetaceae	Treponema	0.024	0.015	0.036	0.063	0.054	0.005	0.002	0	0.006	0.022	0.017	0.036	0.014	0.018	0.002	0	0.005	0.005	0.011	0.068	0.022	0.005
OTU1135	0.502	6.36	0.539496	0.753406	NotSig	Bacteria	Firmicutes	Clostridia	Clostridiales	Ruminococcaceae	Anaerofilum	0.004	0.003	0	0.01	0.002	0.002	0.014	0	0.006	0.002	0	0.008	0.005	0	0.002	0.005	0.005	0.005	0	0.002	0	0.005
OTU954	0.714	5.62	0.539594	0.753406	NotSig	Bacteria	Firmicutes	Clostridia	Clostridiales	Ruminococcaceae	Clostridium_IV	0.001	0	0.002	0	0	0	0.002	0	0	0	0.002	0	0	0	0	0	0	0	0	0.002	0	0
OTU152	0.816	6.662	0.539986	0.753406	NotSig	Bacteria	Chlamydiae	Chlamydiia	Chlamydiales	Chlamydiaceae	Chlamydia	0.007	0.003	0	0.027	0.002	0.016	0	0	0.002	0.024	0	0.004	0	0	0	0	0	0.003	0	0.032	0	0
OTU576	0.985	8.341	0.540101	0.753406	NotSig	Bacteria	Bacteroidetes	Bacteroidia	Bacteroidales	Porphyromonadaceae	Unassigned	0.043	0.016	0.328	0	0.018	0	0	0	0.002	0.081	0	0	0.002	0	0	0	0	0	0.009	0.152	0	0
OTU757	-0.516	7.568	0.541197	0.753406	NotSig	Bacteria	Actinobacteria	Actinobacteria	Coriobacteriales	Coriobacteriaceae	Olsenella	0.013	0.018	0.005	0.002	0.004	0.005	0.025	0.041	0	0.028	0.025	0	0.029	0.052	0.022	0	0.013	0.003	0.026	0	0.017	0.016
OTU406	-0.608	11.761	0.5415	0.753406	NotSig	Bacteria	Bacteroidetes	Unassigned	Unassigned	Unassigned	Unassigned	0.262	0.294	0.469	0.019	0.968	0.482	0.326	0.051	0.049	0.051	0.193	0.01	0.032	0.05	0.005	1.952	0.008	0.003	0.017	0.03	0.825	0.023
OTU1196	0.42	9.828	0.542112	0.753406	NotSig	Bacteria	Firmicutes	Clostridia	Clostridiales	Ruminococcaceae	Oscillibacter	0.1	0.071	0.115	0.232	0.101	0.166	0.054	0.091	0.081	0.104	0.03	0.022	0.054	0.002	0.071	0.023	0.246	0.114	0.028	0.073	0.055	0.045
OTU867	0.523	7.138	0.542558	0.753406	NotSig	Bacteria	Firmicutes	Clostridia	Clostridiales	Lachnospiraceae	Unassigned	0.012	0.007	0.031	0.002	0.009	0	0.02	0.01	0	0.016	0.01	0.026	0.005	0.002	0.015	0	0	0	0.011	0.015	0.022	0.002
OTU885	0.492	6.146	0.542934	0.753406	NotSig	Bacteria	Firmicutes	Clostridia	Clostridiales	Unassigned	Unassigned	0.003	0.002	0.005	0	0.002	0	0.009	0.003	0.004	0	0.005	0.004	0.002	0	0.005	0.002	0.003	0	0.003	0.004	0	0
OTU179	-0.619	6.072	0.543301	0.753406	NotSig	Bacteria	Proteobacteria	Betaproteobacteria	Burkholderiales	Sutterellaceae	Parasutterella	0.002	0.003	0	0.002	0.002	0.007	0	0.005	0	0	0	0	0.007	0.009	0	0	0.005	0.003	0	0	0.005	0
OTU1459	-0.8	6.941	0.543473	0.753406	NotSig	Bacteria	Firmicutes	Clostridia	Clostridiales	Eubacteriaceae	Eubacterium	0.007	0.007	0.007	0.007	0.007	0	0	0.003	0	0	0.042	0	0	0	0.005	0.052	0	0	0	0.002	0.01	0
OTU1098	0.808	8.109	0.543619	0.753406	NotSig	Bacteria	Firmicutes	Clostridia	Clostridiales	Unassigned	Unassigned	0.03	0.018	0	0.007	0	0	0.054	0.003	0.069	0.112	0	0.054	0.066	0	0	0	0	0	0	0.051	0	0.059
OTU1367	0.453	9.997	0.543935	0.753406	NotSig	Bacteria	Firmicutes	Clostridia	Clostridiales	Ruminococcaceae	Unassigned	0.109	0.079	0.146	0.053	0.072	0.311	0.036	0.008	0.077	0.231	0.05	0.105	0.1	0.018	0.012	0.018	0.029	0.025	0.02	0.325	0.105	0.134
OTU1289	0.421	6.518	0.544464	0.753541	NotSig	Bacteria	Firmicutes	Clostridia	Clostridiales	Ruminococcaceae	Clostridium_III	0.006	0.004	0.007	0.012	0.002	0	0.004	0.005	0.008	0.006	0.002	0.01	0.002	0.005	0	0.005	0.005	0.008	0.011	0.002	0	0.002
OTU1206	0.701	5.623	0.545146	0.753888	NotSig	Bacteria	Firmicutes	Clostridia	Clostridiales	Ruminococcaceae	Unassigned	0.001	0	0	0.002	0	0	0	0	0	0.002	0	0.002	0	0	0	0	0	0	0	0	0.002	0
OTU583	0.457	9.017	0.546482	0.755138	NotSig	Bacteria	Bacteroidetes	Bacteroidia	Bacteroidales	Porphyromonadaceae	Unassigned	0.054	0.043	0.088	0.024	0.22	0.044	0.059	0.036	0.021	0.032	0	0.016	0.127	0.045	0.005	0.005	0.086	0.025	0.02	0.015	0.03	0.07
OTU2	-0.37	14.482	0.547306	0.755259	NotSig	Bacteria	Firmicutes	Negativicutes	Selenomonadales	Acidaminococcaceae	Phascolarctobacterium	2.043	2.447	1.944	4.324	1.251	3.644	1.108	3.27	0.762	1.796	1.197	1.133	2.774	2.628	1.189	2.894	3.46	5.235	1.251	3.064	0.715	1.263
OTU767	0.75	5.697	0.547433	0.755259	NotSig	Bacteria	Actinobacteria	Actinobacteria	Actinomycetales	Corynebacteriaceae	Corynebacterium	0.001	0	0	0	0.002	0	0.005	0	0	0	0.002	0	0	0	0	0	0	0	0	0	0	0.005
OTU1315	-0.694	7.324	0.548519	0.756161	NotSig	Bacteria	Firmicutes	Clostridia	Clostridiales	Unassigned	Unassigned	0.01	0.015	0	0.015	0	0	0.013	0	0.002	0.041	0	0.026	0.018	0.054	0	0	0	0	0	0.021	0.025	0.031
OTU1660	-0.666	5.875	0.551949	0.760289	NotSig	Bacteria	Firmicutes	Clostridia	Clostridiales	Lachnospiraceae	Unassigned	0.001	0.002	0	0	0	0	0.002	0	0	0	0.002	0.006	0.002	0	0.005	0	0	0	0.009	0	0	0.002
OTU1227	-0.69	5.602	0.553	0.760847	NotSig	Bacteria	Firmicutes	Clostridia	Clostridiales	Ruminococcaceae	Unassigned	0	0.001	0	0	0	0	0	0	0	0	0	0.002	0	0	0	0	0.005	0	0	0	0	0
OTU933	-0.552	6.071	0.553224	0.760847	NotSig	Bacteria	Firmicutes	Clostridia	Clostridiales	Unassigned	Unassigned	0.002	0.003	0.002	0.002	0	0	0.005	0	0.002	0	0.002	0.004	0.007	0	0	0	0	0.01	0	0.004	0	0.007
OTU1094	-0.414	8.85	0.555415	0.763259	NotSig	Bacteria	Candidatus_Saccharibacteria	Unassigned	Unassigned	Unassigned	Saccharibacteria_genera_incertae_sedis	0.037	0.05	0.012	0.022	0.011	0.026	0.016	0.112	0.041	0.026	0.079	0.03	0.082	0.077	0.007	0.009	0.016	0.008	0.02	0.032	0.077	0.174
OTU410	0.624	9.466	0.55676	0.764506	NotSig	Bacteria	Bacteroidetes	Bacteroidia	Bacteroidales	Prevotellaceae	Unassigned	0.065	0.048	0.002	0.002	0	0.557	0.004	0.061	0	0.008	0.017	0	0.023	0.131	0.002	0.082	0.023	0.023	0.014	0.019	0.132	0.035
OTU1312	-0.67	5.682	0.558557	0.766371	NotSig	Bacteria	Firmicutes	Clostridia	Clostridiales	Ruminococcaceae	Unassigned	0	0.001	0	0	0	0	0	0	0.002	0	0	0.002	0.005	0	0	0	0	0	0	0	0	0.005
OTU1515	0.532	6.006	0.559231	0.766695	NotSig	Bacteria	Firmicutes	Clostridia	Clostridiales	Ruminococcaceae	Unassigned	0.003	0.001	0.005	0.012	0.002	0	0	0	0.002	0.002	0.002	0	0.002	0	0	0.002	0.005	0.003	0	0.002	0	0
OTU1680	0.629	7.582	0.561808	0.769624	NotSig	Bacteria	Firmicutes	Clostridia	Clostridiales	Unassigned	Unassigned	0.019	0.012	0	0.015	0	0.012	0.009	0.005	0.026	0.101	0	0.02	0.043	0.007	0.002	0	0	0	0	0.019	0	0.052
OTU806	-0.464	8.914	0.565078	0.773498	NotSig	Bacteria	Firmicutes	Clostridia	Clostridiales	Unassigned	Unassigned	0.039	0.052	0.014	0.024	0	0	0.034	0.084	0.064	0.012	0.109	0.048	0.014	0.203	0.034	0.025	0.016	0.013	0.125	0.013	0.067	0.009
OTU1695	-0.358	7.192	0.567025	0.775555	NotSig	Bacteria	Firmicutes	Clostridia	Clostridiales	Unassigned	Unassigned	0.01	0.012	0.002	0.015	0.004	0.005	0.018	0.01	0.004	0.02	0.012	0.006	0.02	0.007	0.007	0.011	0.003	0.01	0.031	0.006	0.005	0.014
OTU1416	-0.427	8.566	0.568542	0.777023	NotSig	Bacteria	Firmicutes	Clostridia	Clostridiales	Lachnospiraceae	Lachnospiracea_incertae_sedis	0.03	0.038	0.019	0.019	0.007	0.016	0.043	0.03	0.034	0.047	0.027	0.052	0.032	0.005	0	0	0.016	0.058	0.034	0.088	0.08	0.073
OTU642	0.801	6.058	0.570154	0.778617	NotSig	Bacteria	Bacteroidetes	Bacteroidia	Bacteroidales	Porphyromonadaceae	Butyricimonas	0.003	0.001	0	0.002	0	0.009	0	0	0	0	0	0.014	0	0	0	0.007	0.003	0.003	0	0	0	0
OTU1093	-0.392	9.679	0.57109	0.778884	NotSig	Bacteria	Firmicutes	Clostridia	Clostridiales	Ruminococcaceae	Oscillibacter	0.071	0.086	0.294	0.075	0.108	0.037	0.009	0.038	0.039	0.028	0.057	0.024	0.197	0.016	0.076	0.048	0.023	0.03	0.06	0.147	0.08	0.186
OTU132	-0.93	9.52	0.571633	0.778884	NotSig	Bacteria	Firmicutes	Negativicutes	Selenomonadales	Veillonellaceae	Mitsuokella	0.05	0.058	0	0	0	0.131	0.013	0	0	0	0.357	0.002	0	0	0.002	0.563	0	0.003	0	0	0.01	0
OTU826	0.373	8.31	0.571687	0.778884	NotSig	Bacteria	Firmicutes	Unassigned	Unassigned	Unassigned	Unassigned	0.033	0.022	0.069	0.005	0.045	0.012	0.038	0.018	0.024	0.035	0.057	0.022	0.025	0.007	0.034	0.007	0.026	0.025	0.014	0.058	0.007	0.019
OTU376	0.431	7.523	0.57317	0.780297	NotSig	Bacteria	Bacteroidetes	Bacteroidia	Bacteroidales	Prevotellaceae	Alloprevotella	0.018	0.011	0.019	0	0.016	0.002	0.014	0.018	0.006	0.067	0.025	0.01	0.005	0.002	0.01	0.011	0.034	0.025	0	0.013	0.005	0.005
OTU28	-0.457	11.152	0.575457	0.782267	NotSig	Bacteria	Bacteroidetes	Bacteroidia	Bacteroidales	Prevotellaceae	Prevotella	0.211	0.232	0.124	0.375	0.133	0.009	0.325	0.665	0.054	0.367	0.02	0.034	0.265	0.027	0.985	0.025	0.454	0.35	0.023	0.024	0.015	0.155
OTU120	-0.61	6.738	0.575512	0.782267	NotSig	Bacteria	Unassigned	Unassigned	Unassigned	Unassigned	Unassigned	0.005	0.008	0.002	0.002	0.002	0	0	0.03	0.004	0	0.007	0.004	0.002	0.059	0.002	0.005	0	0	0.011	0	0	0
OTU1341	0.719	5.694	0.576318	0.782754	NotSig	Bacteria	Unassigned	Unassigned	Unassigned	Unassigned	Unassigned	0.001	0	0.002	0	0.002	0	0	0	0.004	0	0	0	0	0.005	0	0	0	0	0	0	0	0
OTU1313	-0.638	5.609	0.577581	0.78386	NotSig	Bacteria	Firmicutes	Clostridia	Clostridiales	Unassigned	Unassigned	0	0	0	0	0	0	0	0	0.002	0	0	0	0	0.002	0.002	0	0	0	0	0	0	0
OTU1210	-0.626	7.473	0.578764	0.784857	NotSig	Bacteria	Firmicutes	Unassigned	Unassigned	Unassigned	Unassigned	0.011	0.018	0.038	0	0.02	0.007	0.036	0	0	0	0.005	0.004	0.005	0.063	0.007	0	0.003	0	0.1	0	0	0.005
OTU1550	-0.621	5.595	0.580909	0.787154	NotSig	Bacteria	Firmicutes	Clostridia	Clostridiales	Unassigned	Unassigned	0	0	0	0	0	0	0	0	0	0	0	0.002	0	0.002	0	0	0	0	0	0.002	0	0
OTU86	-0.619	5.595	0.581857	0.787387	NotSig	Bacteria	Unassigned	Unassigned	Unassigned	Unassigned	Unassigned	0	0	0	0.002	0	0	0	0	0	0	0	0	0	0	0	0	0	0.003	0	0	0	0.002
OTU1410	0.427	7.08	0.582378	0.787387	NotSig	Bacteria	Firmicutes	Clostridia	Clostridiales	Ruminococcaceae	Unassigned	0.011	0.008	0.007	0.034	0.002	0.012	0.007	0.003	0.013	0	0.022	0.008	0.02	0.002	0.002	0.002	0	0.003	0.031	0.009	0.002	0.009
OTU481	0.484	6.616	0.582567	0.787387	NotSig	Bacteria	Bacteroidetes	Bacteroidia	Bacteroidales	Prevotellaceae	Prevotella	0.007	0.004	0.005	0.046	0.007	0.002	0.005	0.003	0	0.002	0	0	0.005	0.007	0.005	0	0.013	0.005	0.006	0	0.002	0.002
OTU1237	-0.583	5.658	0.58315	0.787387	NotSig	Bacteria	Firmicutes	Clostridia	Clostridiales	Eubacteriaceae	Eubacterium	0	0.001	0.002	0	0	0	0.002	0	0	0	0	0	0	0	0	0	0	0.003	0	0	0.002	0.002
OTU914	0.709	5.691	0.583895	0.787387	NotSig	Bacteria	Firmicutes	Clostridia	Clostridiales	Unassigned	Unassigned	0.001	0	0.007	0	0	0.002	0	0	0	0	0	0	0.002	0	0	0	0	0	0	0	0	0.002
OTU841	-0.806	7.756	0.584234	0.787387	NotSig	Bacteria	Firmicutes	Clostridia	Clostridiales	Ruminococcaceae	Unassigned	0.013	0.024	0	0.019	0	0	0	0.041	0	0	0	0.07	0.077	0	0	0	0	0	0.009	0.047	0	0.103
OTU1318	0.685	5.681	0.584234	0.787387	NotSig	Bacteria	Firmicutes	Clostridia	Clostridiales	Unassigned	Unassigned	0.001	0	0	0.005	0	0	0	0	0.002	0	0	0.002	0.005	0	0	0	0	0	0	0	0	0
OTU1567	-0.439	7.127	0.584871	0.787638	NotSig	Bacteria	Firmicutes	Clostridia	Clostridiales	Lachnospiraceae	Unassigned	0.009	0.012	0.029	0.019	0.009	0	0.014	0.003	0.002	0.004	0.007	0.002	0.002	0.002	0.002	0.002	0.018	0.01	0.057	0.011	0.01	0
OTU1178	0.841	5.732	0.588307	0.791655	NotSig	Bacteria	Firmicutes	Clostridia	Clostridiales	Lachnospiraceae	Unassigned	0.001	0	0	0	0	0	0.002	0	0.008	0	0	0	0	0	0	0	0	0	0	0.004	0	0
OTU213	0.76	5.895	0.589242	0.792304	NotSig	Bacteria	Unassigned	Unassigned	Unassigned	Unassigned	Unassigned	0.002	0.001	0.002	0.007	0.002	0	0	0	0	0	0	0.008	0	0	0	0	0	0	0	0.009	0	0
OTU689	-0.591	5.58	0.590439	0.79299	NotSig	Bacteria	Bacteroidetes	Bacteroidia	Bacteroidales	Porphyromonadaceae	Unassigned	0	0	0	0	0	0	0	0	0	0.002	0	0	0.005	0	0	0	0	0	0	0	0	0
OTU1545	0.593	5.608	0.59066	0.79299	NotSig	Bacteria	Firmicutes	Clostridia	Clostridiales	Ruminococcaceae	Unassigned	0.001	0	0	0	0	0	0.005	0	0	0	0	0	0	0	0	0	0.003	0	0	0	0	0
OTU140	-0.464	7.207	0.591151	0.793041	NotSig	Bacteria	Firmicutes	Unassigned	Unassigned	Unassigned	Unassigned	0.009	0.011	0.002	0.036	0	0.007	0	0.003	0.009	0.004	0.01	0.018	0.011	0	0.007	0.007	0.005	0.01	0	0.038	0.002	0.031
OTU801	0.352	11.329	0.591786	0.793283	NotSig	Bacteria	Firmicutes	Clostridia	Clostridiales	Lachnospiraceae	Unassigned	0.292	0.234	0.789	0.317	0.344	0.044	0.106	0.195	0.477	0.351	0.139	0.161	0.174	0.224	0.064	0.009	0.246	0.345	0.589	0.218	0.159	0.315
OTU539	0.835	5.85	0.592635	0.793813	NotSig	Bacteria	Bacteroidetes	Bacteroidia	Bacteroidales	Prevotellaceae	Prevotella	0.002	0.001	0	0.017	0.002	0	0	0	0	0	0	0	0	0.002	0.005	0	0	0	0	0	0	0
OTU223	0.689	5.827	0.593704	0.794636	NotSig	Bacteria	Unassigned	Unassigned	Unassigned	Unassigned	Unassigned	0.002	0.001	0	0	0	0	0.011	0	0	0.004	0	0.002	0.005	0	0	0	0	0	0	0	0	0.005
OTU474	-0.586	5.888	0.595334	0.796201	NotSig	Bacteria	Bacteroidetes	Unassigned	Unassigned	Unassigned	Unassigned	0.001	0.002	0	0.002	0	0.002	0	0	0	0	0	0.006	0.005	0	0	0	0	0	0.003	0.002	0	0.009
OTU1487	-0.59	5.896	0.595784	0.796201	NotSig	Bacteria	Firmicutes	Clostridia	Clostridiales	Lachnospiraceae	Unassigned	0.001	0.002	0	0	0	0	0	0	0	0.008	0.002	0.002	0.007	0.005	0	0.002	0	0	0.006	0	0	0
OTU192	-0.561	5.666	0.597404	0.797756	NotSig	Bacteria	Unassigned	Unassigned	Unassigned	Unassigned	Unassigned	0	0.001	0	0	0	0	0	0	0.002	0.002	0	0	0	0	0	0	0.003	0.003	0.003	0	0	0
OTU1212	-0.58	7.485	0.598779	0.798982	NotSig	Bacteria	Firmicutes	Clostridia	Clostridiales	Unassigned	Unassigned	0.013	0.014	0.002	0	0	0	0.011	0	0	0.022	0.094	0	0.005	0.005	0.017	0.034	0.016	0.018	0	0	0.035	0.009
OTU486	-0.57	5.601	0.603566	0.804755	NotSig	Bacteria	Bacteroidetes	Bacteroidia	Bacteroidales	Prevotellaceae	Prevotella	0	0	0	0	0.002	0	0	0	0	0	0	0	0	0.002	0	0	0.003	0	0	0	0	0
OTU1077	-0.61	5.66	0.604837	0.805835	NotSig	Bacteria	Firmicutes	Clostridia	Clostridiales	Unassigned	Unassigned	0	0.001	0	0.002	0	0	0.002	0	0	0	0	0	0	0.002	0	0	0	0	0	0	0.005	0
OTU698	-0.592	5.709	0.606817	0.806941	NotSig	Bacteria	Actinobacteria	Actinobacteria	Actinomycetales	Corynebacteriaceae	Corynebacterium	0.001	0.001	0	0	0	0	0.002	0	0	0.004	0	0	0	0	0	0	0	0	0.003	0.004	0	0.002
OTU1581	0.578	5.691	0.607057	0.806941	NotSig	Bacteria	Firmicutes	Clostridia	Clostridiales	Ruminococcaceae	Unassigned	0.001	0	0	0.002	0.002	0	0	0	0	0	0.005	0	0	0	0	0	0	0	0	0.002	0	0.002
OTU1468	-0.384	6.303	0.607383	0.806941	NotSig	Bacteria	Firmicutes	Clostridia	Clostridiales	Ruminococcaceae	Clostridium_IV	0.003	0.004	0.014	0.002	0.002	0.002	0	0.003	0	0.006	0	0.002	0.005	0.002	0.002	0.002	0.008	0.005	0.006	0.002	0	0.007
OTU849	0.48	6.888	0.607514	0.806941	NotSig	Bacteria	Firmicutes	Clostridia	Clostridiales	Unassigned	Unassigned	0.009	0.006	0.002	0.015	0.02	0	0.014	0.005	0.006	0.008	0	0.018	0.005	0	0	0	0	0.003	0.011	0	0.03	0.014
OTU558	-0.553	5.588	0.609261	0.808265	NotSig	Bacteria	Bacteroidetes	Bacteroidia	Bacteroidales	Prevotellaceae	Prevotella	0	0	0.002	0	0	0	0	0	0	0	0	0	0.002	0	0	0	0	0	0	0	0	0.002
OTU356	-0.615	5.716	0.609595	0.808265	NotSig	Bacteria	Unassigned	Unassigned	Unassigned	Unassigned	Unassigned	0	0.001	0	0	0	0.005	0	0	0	0	0	0	0.002	0	0	0	0	0	0	0	0.005	0.002
OTU780	-0.396	6.406	0.610061	0.808265	NotSig	Bacteria	Firmicutes	Clostridia	Clostridiales	Unassigned	Unassigned	0.003	0.005	0.005	0.005	0.002	0.014	0.002	0	0	0.006	0	0	0.007	0.009	0.002	0.002	0.003	0	0.006	0.004	0.005	0.007
OTU1065	0.4	6.221	0.61036	0.808265	NotSig	Bacteria	Firmicutes	Clostridia	Clostridiales	Ruminococcaceae	Unassigned	0.004	0.002	0.002	0.01	0	0	0.005	0.003	0	0.002	0.005	0.01	0.005	0.002	0.002	0.005	0	0	0	0.004	0.002	0.002
OTU204	-0.541	5.94	0.611823	0.809588	NotSig	Bacteria	Unassigned	Unassigned	Unassigned	Unassigned	Unassigned	0.001	0.002	0	0	0	0	0	0.008	0	0	0	0.006	0.002	0	0	0.002	0	0	0.006	0.004	0.002	0.002
OTU461	0.481	7.133	0.616173	0.814728	NotSig	Bacteria	Bacteroidetes	Bacteroidia	Bacteroidales	Prevotellaceae	Unassigned	0.012	0.009	0.022	0.039	0.002	0	0.004	0.015	0	0.008	0.002	0.032	0.054	0.016	0	0	0	0.003	0	0.004	0.002	0.009
OTU870	-0.479	6.035	0.617698	0.815513	NotSig	Bacteria	Firmicutes	Clostridia	Unassigned	Unassigned	Unassigned	0.002	0.002	0	0.002	0	0.005	0.004	0	0.002	0.004	0	0	0.005	0	0	0.002	0	0.003	0	0.011	0	0.002
OTU883	0.372	6.458	0.617889	0.815513	NotSig	Bacteria	Firmicutes	Clostridia	Clostridiales	Ruminococcaceae	Unassigned	0.005	0.004	0	0.015	0.007	0	0.009	0.003	0.008	0.004	0.002	0.004	0.007	0.005	0	0	0.005	0.005	0.003	0.009	0	0.005
OTU451	0.489	7.576	0.61842	0.815513	NotSig	Bacteria	Bacteroidetes	Bacteroidia	Bacteroidales	Porphyromonadaceae	Unassigned	0.016	0.013	0.005	0.027	0.09	0.009	0.005	0.003	0.008	0.006	0	0.012	0.009	0	0	0	0	0.003	0.057	0.038	0.002	0.016
OTU814	-0.427	8.183	0.618633	0.815513	NotSig	Bacteria	Firmicutes	Clostridia	Clostridiales	Unassigned	Unassigned	0.019	0.027	0.005	0.015	0	0.068	0.014	0.023	0.03	0.034	0	0.006	0.041	0.018	0	0.011	0.008	0.005	0.017	0.062	0.095	0.014
OTU258	-0.528	5.585	0.619831	0.816477	NotSig	Bacteria	Spirochaetes	Spirochaetia	Spirochaetales	Spirochaetaceae	Unassigned	0	0	0	0	0	0	0	0	0	0	0	0.002	0.005	0	0	0	0	0	0	0	0	0
OTU789	0.383	11.041	0.621651	0.818258	NotSig	Bacteria	Firmicutes	Clostridia	Clostridiales	Ruminococcaceae	Unassigned	0.23	0.18	0.531	0	0.281	0.307	0.289	0.269	0.331	0.179	0.084	0.034	0.208	0.432	0.172	0.005	0.018	0.018	0.239	0.361	0.167	0.176
OTU1261	0.49	8.206	0.626643	0.823439	NotSig	Bacteria	Unassigned	Unassigned	Unassigned	Unassigned	Unassigned	0.031	0.019	0.01	0.029	0.029	0	0.097	0.008	0.045	0.018	0.077	0	0.007	0	0.002	0	0	0.003	0.009	0.118	0.042	0.007
OTU940	-0.504	5.952	0.626942	0.823439	NotSig	Bacteria	Firmicutes	Clostridia	Clostridiales	Unassigned	Unassigned	0.001	0.002	0.002	0.005	0.002	0	0.005	0	0	0	0	0	0.007	0.002	0	0	0.005	0.008	0	0	0	0
OTU164	0.836	6.068	0.627001	0.823439	NotSig	Bacteria	Unassigned	Unassigned	Unassigned	Unassigned	Unassigned	0.003	0.001	0	0.002	0	0	0	0.005	0	0	0	0.022	0	0	0	0	0	0	0	0.013	0	0
OTU1463	0.549	6.222	0.628481	0.824576	NotSig	Bacteria	Firmicutes	Clostridia	Clostridiales	Unassigned	Unassigned	0.004	0.003	0.005	0	0.002	0	0.025	0.005	0	0	0	0.002	0.007	0	0.002	0	0	0.003	0.014	0	0	0
OTU75	-0.334	11.937	0.629277	0.824576	NotSig	Bacteria	Bacteroidetes	Bacteroidia	Bacteroidales	Unassigned	Unassigned	0.352	0.371	0.572	0.136	0.207	0.108	1.131	0.266	0.577	0.045	0.203	0.28	0.095	0.366	1.204	0.37	0.21	0.262	0.159	0.282	0.638	0.129
OTU1360	0.498	9.016	0.629282	0.824576	NotSig	Bacteria	Firmicutes	Clostridia	Clostridiales	Lachnospiraceae	Unassigned	0.056	0.042	0.029	0.031	0.009	0	0.007	0	0.051	0.093	0.025	0.32	0.061	0	0	0	0.031	0.041	0.117	0.071	0	0.101
OTU510	-0.493	5.801	0.630136	0.825077	NotSig	Bacteria	Bacteroidetes	Bacteroidia	Bacteroidales	Prevotellaceae	Prevotella	0.001	0.001	0.002	0	0.002	0	0	0.003	0	0	0.002	0	0.002	0.009	0	0	0	0	0.003	0	0	0
OTU784	-0.585	5.681	0.630691	0.825185	NotSig	Bacteria	Firmicutes	Clostridia	Unassigned	Unassigned	Unassigned	0.001	0.001	0	0	0	0	0	0.005	0	0	0	0	0	0	0.002	0	0.003	0	0	0.002	0	0
OTU1597	0.61	8.283	0.631658	0.825833	NotSig	Bacteria	Firmicutes	Clostridia	Clostridiales	Lachnospiraceae	Unassigned	0.034	0.024	0.007	0.007	0	0	0.172	0	0.041	0.041	0	0.07	0.011	0	0	0.002	0	0	0.222	0.004	0	0.005
OTU1608	0.296	9.351	0.634317	0.827544	NotSig	Bacteria	Actinobacteria	Actinobacteria	Coriobacteriales	Coriobacteriaceae	Unassigned	0.069	0.054	0.017	0.07	0.038	0.059	0.106	0.056	0.062	0.101	0.055	0.127	0.057	0.038	0.037	0.005	0.029	0.061	0.065	0.109	0.065	0.077
OTU753	0.317	10.893	0.634848	0.827544	NotSig	Bacteria	Firmicutes	Clostridia	Clostridiales	Ruminococcaceae	Unassigned	0.223	0.177	0.069	0.213	0.018	0.183	0.545	0.081	0.088	0.501	0.292	0.243	0.294	0.269	0.098	0.023	0.052	0.046	0.409	0.103	0.1	0.376
OTU427	0.476	8.696	0.634918	0.827544	NotSig	Bacteria	Bacteroidetes	Bacteroidia	Bacteroidales	Prevotellaceae	Prevotella	0.043	0.033	0.033	0.104	0.029	0	0.005	0.015	0.131	0.067	0.02	0.02	0.154	0.043	0.034	0	0	0	0	0.024	0	0.077
OTU1186	-0.55	5.662	0.634954	0.827544	NotSig	Bacteria	Firmicutes	Clostridia	Clostridiales	Ruminococcaceae	Unassigned	0	0.001	0	0	0.002	0	0.002	0	0	0	0	0	0	0.002	0	0	0.005	0	0	0	0	0
OTU917	-0.483	5.78	0.635334	0.827544	NotSig	Bacteria	Firmicutes	Clostridia	Clostridiales	Unassigned	Unassigned	0.001	0.001	0	0.002	0	0	0.004	0	0.002	0	0	0	0	0	0	0	0	0.005	0	0.002	0.002	0.002
OTU343	0.604	5.606	0.636422	0.828343	NotSig	Bacteria	Unassigned	Unassigned	Unassigned	Unassigned	Unassigned	0	0	0	0	0	0.002	0	0	0.002	0	0	0	0	0.002	0	0	0	0	0	0	0	0
OTU184	-0.495	5.687	0.641384	0.834181	NotSig	Bacteria	Unassigned	Unassigned	Unassigned	Unassigned	Unassigned	0	0.001	0	0	0	0.002	0	0.003	0	0	0	0	0.002	0	0	0.002	0	0	0	0	0.002	0
OTU1119	-0.491	6.566	0.642522	0.83504	NotSig	Bacteria	Firmicutes	Clostridia	Clostridiales	Ruminococcaceae	Oscillibacter	0.005	0.006	0.005	0.029	0.004	0	0.004	0.003	0	0.002	0	0	0	0	0.005	0	0.018	0.018	0.014	0	0.005	0
OTU1486	0.605	5.815	0.643217	0.835322	NotSig	Bacteria	Actinobacteria	Actinobacteria	Coriobacteriales	Coriobacteriaceae	Unassigned	0.002	0.001	0	0	0	0	0.002	0	0.002	0.012	0	0	0.005	0	0	0	0	0	0	0	0	0.005
OTU349	-0.473	5.59	0.644658	0.836301	NotSig	Bacteria	Unassigned	Unassigned	Unassigned	Unassigned	Unassigned	0	0	0	0	0	0	0	0	0.002	0	0	0	0.005	0	0	0	0	0	0	0	0	0
OTU809	0.382	8.926	0.644928	0.836301	NotSig	Bacteria	Firmicutes	Clostridia	Clostridiales	Unassigned	Unassigned	0.055	0.041	0.012	0.077	0.007	0.021	0.163	0	0.017	0.108	0.067	0.078	0.1	0.029	0	0.011	0.005	0.005	0.023	0.056	0.01	0.169
OTU581	-0.468	6.055	0.647127	0.838531	NotSig	Bacteria	Bacteroidetes	Bacteroidia	Bacteroidales	Prevotellaceae	Prevotella	0.002	0.003	0	0.005	0.004	0	0.002	0	0	0.008	0	0	0	0	0.005	0	0.005	0.005	0.009	0	0	0.002
OTU951	-0.362	5.977	0.649519	0.841007	NotSig	Bacteria	Firmicutes	Clostridia	Clostridiales	Ruminococcaceae	Unassigned	0.002	0.002	0.002	0.002	0	0	0.002	0	0	0.004	0.007	0	0.002	0.005	0	0	0	0.003	0.006	0.002	0.002	0.002
OTU1717	-0.463	5.673	0.651111	0.842444	NotSig	Bacteria	Firmicutes	Clostridia	Clostridiales	Ruminococcaceae	Unassigned	0	0.001	0	0	0	0.002	0	0	0	0	0.002	0	0	0	0	0	0.003	0.003	0	0	0	0.002
OTU1691	-0.322	6.386	0.651892	0.842831	NotSig	Bacteria	Firmicutes	Clostridia	Clostridiales	Ruminococcaceae	Unassigned	0.003	0.004	0.005	0.005	0.002	0.005	0.005	0.003	0.004	0	0	0.006	0.005	0.007	0.002	0	0.008	0.005	0.003	0.011	0	0.002
OTU1373	0.57	5.621	0.653214	0.84309	NotSig	Bacteria	Firmicutes	Clostridia	Clostridiales	Lachnospiraceae	Clostridium_XlVa	0	0	0	0	0	0.005	0	0	0	0	0	0	0	0	0	0	0	0	0	0	0.002	0
OTU1709	-0.541	5.96	0.653783	0.84309	NotSig	Bacteria	Firmicutes	Clostridia	Clostridiales	Unassigned	Unassigned	0.001	0.002	0	0.002	0	0	0	0.003	0.002	0.008	0	0	0.005	0	0	0	0	0	0	0.013	0	0.002
OTU1743	0.497	5.704	0.653843	0.84309	NotSig	Archaea	Euryarchaeota	Thermoplasmata	Unassigned	Unassigned	Unassigned	0.001	0.001	0.002	0.005	0.002	0	0	0	0	0	0	0	0	0	0.002	0	0	0	0.003	0	0	0
OTU1402	0.37	7.432	0.654021	0.84309	NotSig	Bacteria	Firmicutes	Clostridia	Clostridiales	Unassigned	Unassigned	0.015	0.011	0.026	0.012	0.038	0.012	0.005	0.038	0	0.01	0.007	0.002	0.005	0	0.002	0	0.026	0.028	0.009	0.009	0.03	0.002
OTU470	-0.486	6.889	0.655764	0.84432	NotSig	Bacteria	Bacteroidetes	Unassigned	Unassigned	Unassigned	Unassigned	0.006	0.008	0	0.005	0	0.028	0.004	0	0	0	0.022	0	0	0.016	0.007	0.009	0.021	0.015	0	0.002	0.01	0
OTU681	0.324	7.091	0.655942	0.84432	NotSig	Bacteria	Bacteroidetes	Bacteroidia	Bacteroidales	Porphyromonadaceae	Unassigned	0.011	0.008	0.014	0.005	0.002	0.007	0.023	0.003	0.006	0.016	0.02	0.014	0.018	0.014	0	0.007	0	0	0.009	0.017	0.002	0.014
OTU1513	0.548	5.599	0.659345	0.848076	NotSig	Bacteria	Proteobacteria	Alphaproteobacteria	Rhodospirillales	Unassigned	Unassigned	0	0	0	0	0	0	0	0	0.004	0	0	0	0	0.002	0	0	0	0	0	0	0	0
OTU463	-0.45	6.386	0.662615	0.851602	NotSig	Bacteria	Bacteroidetes	Bacteroidia	Bacteroidales	Rikenellaceae	Alistipes	0.004	0.005	0	0.002	0	0.002	0.023	0	0	0	0.007	0	0	0.014	0.005	0	0.013	0.003	0.003	0.002	0	0.007
OTU746	0.31	10.433	0.663334	0.851602	NotSig	Bacteria	Firmicutes	Clostridia	Clostridiales	Unassigned	Unassigned	0.155	0.119	0.053	0.182	0.072	0.002	0.156	0.074	0.212	0.309	0.131	0.354	0.097	0.009	0.133	0.011	0.213	0.335	0.085	0.06	0.08	0.171
OTU561	0.481	6.621	0.663765	0.851602	NotSig	Bacteria	Bacteroidetes	Bacteroidia	Bacteroidales	Prevotellaceae	Prevotella	0.007	0.004	0.007	0.027	0.029	0	0	0	0	0	0.002	0	0.014	0.007	0.012	0.002	0	0	0.003	0.002	0	0.002
OTU748	0.318	14.062	0.664035	0.851602	NotSig	Bacteria	Firmicutes	Clostridia	Clostridiales	Peptostreptococcaceae	Unassigned	1.898	1.46	1.284	1.38	0.714	0.049	1.23	1.119	4.725	4.742	0.558	3.174	0.639	1.875	0.459	0.073	0.461	0.995	1.22	6.216	1.039	1.625
OTU1390	0.325	9.744	0.665776	0.853209	NotSig	Bacteria	Firmicutes	Clostridia	Clostridiales	Lachnospiraceae	Unassigned	0.098	0.081	0.036	0.08	0.018	0.037	0.106	0.089	0.103	0.445	0.027	0.038	0.31	0.12	0.01	0.009	0.005	0.008	0.117	0.034	0.03	0.164
OTU390	-0.323	11.914	0.666572	0.853603	NotSig	Bacteria	Bacteroidetes	Bacteroidia	Bacteroidales	Porphyromonadaceae	Unassigned	0.383	0.44	0.615	0.327	0.445	0.026	0.036	0.332	0.002	1.622	0.235	0.189	0.947	0.465	0.253	0.02	0.194	0.168	0.429	0.415	0.69	0.822
OTU1663	-0.488	5.662	0.668162	0.855013	NotSig	Bacteria	Firmicutes	Clostridia	Clostridiales	Lachnospiraceae	Unassigned	0	0.001	0	0	0	0	0	0.003	0	0	0	0.002	0	0	0	0	0	0	0	0	0.002	0.005
OTU1096	0.272	8.609	0.670072	0.856636	NotSig	Bacteria	Firmicutes	Unassigned	Unassigned	Unassigned	Unassigned	0.041	0.03	0.093	0.031	0.022	0.014	0.032	0.061	0.026	0.008	0.097	0.026	0.036	0.043	0.01	0.03	0.036	0.028	0.009	0.019	0.065	0.026
OTU938	-0.566	5.746	0.670411	0.856636	NotSig	Bacteria	Firmicutes	Clostridia	Clostridiales	Lachnospiraceae	Clostridium_XlVb	0.001	0.001	0	0	0.004	0	0	0	0	0.002	0	0	0	0.009	0	0	0	0.003	0	0	0	0
OTU55	0.842	8.327	0.671028	0.856798	NotSig	Bacteria	Spirochaetes	Spirochaetia	Spirochaetales	Spirochaetaceae	Treponema	0.036	0.017	0.158	0	0.2	0	0	0	0	0	0	0	0	0	0	0	0	0	0	0.169	0	0
OTU915	0.357	6.788	0.673888	0.859273	NotSig	Bacteria	Firmicutes	Clostridia	Clostridiales	Unassigned	Unassigned	0.008	0.006	0	0.024	0	0	0.007	0	0.013	0.002	0.007	0.022	0.009	0.009	0	0	0.008	0.01	0.009	0.004	0.002	0.009
OTU1543	-0.556	5.805	0.67395	0.859273	NotSig	Bacteria	Firmicutes	Clostridia	Clostridiales	Ruminococcaceae	Unassigned	0.001	0.001	0	0	0	0	0.009	0	0	0	0	0	0.007	0.002	0.002	0	0	0	0	0	0.002	0
OTU1082	0.451	5.729	0.674563	0.859429	NotSig	Bacteria	Firmicutes	Clostridia	Clostridiales	Ruminococcaceae	Unassigned	0.001	0.001	0.002	0.002	0	0	0	0	0.002	0.004	0	0	0.005	0	0	0	0	0	0	0	0	0.002
OTU823	-0.27	9.228	0.675609	0.859683	NotSig	Bacteria	Firmicutes	Clostridia	Clostridiales	Ruminococcaceae	Unassigned	0.053	0.066	0.088	0.053	0.097	0.028	0.048	0.089	0.019	0.045	0.037	0.026	0.156	0.09	0.007	0.014	0.065	0.074	0.148	0.019	0.012	0.077
OTU1681	0.358	7.956	0.676134	0.859683	NotSig	Bacteria	Firmicutes	Clostridia	Clostridiales	Ruminococcaceae	Unassigned	0.023	0.019	0.002	0.102	0.002	0.021	0.002	0.003	0.034	0.008	0.005	0.052	0.025	0.038	0	0	0.01	0.008	0.048	0.019	0.005	0.04
OTU69	-0.61	5.965	0.676719	0.859683	NotSig	Bacteria	Unassigned	Unassigned	Unassigned	Unassigned	Unassigned	0.002	0.002	0	0	0	0	0.005	0.003	0	0	0.007	0	0.007	0	0	0	0	0	0	0	0.015	0
OTU1372	0.515	5.614	0.67673	0.859683	NotSig	Bacteria	Firmicutes	Clostridia	Clostridiales	Unassigned	Unassigned	0	0	0	0	0	0.002	0	0	0.002	0	0	0	0	0	0	0	0	0	0	0	0.002	0
OTU965	0.483	5.878	0.678104	0.860449	NotSig	Bacteria	Firmicutes	Clostridia	Clostridiales	Unassigned	Unassigned	0.002	0.001	0.002	0.002	0	0.002	0	0.003	0.002	0.006	0	0	0	0	0	0	0	0	0	0	0	0.012
OTU1447	-0.672	7.367	0.678317	0.860449	NotSig	Bacteria	Firmicutes	Clostridia	Clostridiales	Lachnospiraceae	Unassigned	0.009	0.013	0	0	0	0	0.065	0.005	0.021	0	0	0.004	0	0	0	0.002	0	0	0	0.124	0	0
OTU491	-0.635	5.718	0.679415	0.860659	NotSig	Bacteria	Bacteroidetes	Unassigned	Unassigned	Unassigned	Unassigned	0.001	0.001	0	0.002	0	0	0.004	0	0	0	0	0	0	0	0	0	0	0	0	0.009	0	0
OTU1089	-0.306	11.001	0.679966	0.860659	NotSig	Bacteria	Firmicutes	Clostridia	Clostridiales	Lachnospiraceae	Roseburia	0.207	0.208	0.23	0.131	0.043	0.047	0.294	0.35	0.006	0.175	0.771	0.026	0.034	0.427	0.403	0.095	0.083	0.31	0.191	0.038	0.473	0.028
OTU1472	0.434	6.072	0.680479	0.860659	NotSig	Bacteria	Firmicutes	Clostridia	Clostridiales	Lachnospiraceae	Unassigned	0.003	0.002	0	0.005	0	0	0.002	0.003	0.002	0.004	0	0.012	0.002	0	0	0	0	0	0	0.009	0	0.007
OTU248	0.704	5.928	0.680763	0.860659	NotSig	Bacteria	Firmicutes	Unassigned	Unassigned	Unassigned	Unassigned	0.002	0.001	0	0	0	0.016	0	0	0	0	0	0	0.005	0	0	0	0.005	0	0.003	0	0	0
OTU51	0.612	9.336	0.680945	0.860659	NotSig	Bacteria	Spirochaetes	Spirochaetia	Spirochaetales	Spirochaetaceae	Treponema	0.059	0.055	0	0.007	0	0.028	0.002	0	0.46	0	0.062	0.034	0.211	0.005	0	0	0	0	0	0	0	0.333
OTU1457	-0.322	6.847	0.681837	0.861165	NotSig	Bacteria	Firmicutes	Clostridia	Clostridiales	Lachnospiraceae	Unassigned	0.007	0.008	0.007	0.01	0.004	0	0.002	0	0.008	0.006	0.027	0.004	0.014	0.009	0	0.005	0.003	0	0.028	0.002	0.015	0.007
OTU1107	0.307	7.672	0.686402	0.866005	NotSig	Bacteria	Firmicutes	Clostridia	Clostridiales	Ruminococcaceae	Oscillibacter	0.018	0.014	0.026	0.022	0.009	0	0.004	0.023	0.028	0.022	0.015	0.034	0.011	0	0.007	0.007	0.057	0.028	0.02	0.002	0.005	0.005
OTU743	0.284	10.173	0.68666	0.866005	NotSig	Bacteria	Firmicutes	Clostridia	Clostridiales	Clostridiaceae_1	Clostridium_sensu_stricto	0.125	0.096	0.098	0.075	0.083	0.061	0.013	0.036	0.203	0.471	0.047	0.161	0.029	0.023	0.057	0.025	0.2	0.109	0.145	0.271	0.05	0.052
OTU103	-0.504	8.433	0.690089	0.869701	NotSig	Bacteria	Unassigned	Unassigned	Unassigned	Unassigned	Unassigned	0.025	0.031	0.005	0.036	0.007	0	0	0.018	0.015	0	0.005	0.165	0.009	0	0	0	0	0.003	0.006	0.276	0	0.019
OTU40	-0.272	10.966	0.690709	0.869856	NotSig	Bacteria	Bacteroidetes	Bacteroidia	Bacteroidales	Prevotellaceae	Prevotella	0.187	0.222	0.103	0.746	0.191	0.098	0.111	0.165	0.182	0.091	0.136	0.046	0.387	0.129	0.037	0.043	0.583	0.434	0.136	0.207	0.012	0.254
OTU1419	-0.293	6.305	0.69124	0.869898	NotSig	Bacteria	Firmicutes	Clostridia	Clostridiales	Unassigned	Unassigned	0.003	0.004	0.005	0	0.002	0.007	0.004	0.003	0.002	0.004	0.002	0.002	0.002	0.005	0.005	0	0.003	0	0	0.004	0.012	0.005
OTU1739	0.265	11.178	0.69519	0.87424	NotSig	Archaea	Euryarchaeota	Methanobacteria	Methanobacteriales	Methanobacteriaceae	Methanobrevibacter	0.25	0.214	0.177	0.259	0.42	0.07	0.041	0.142	0.299	0.242	0.27	0.577	0.36	0.264	0.093	0.009	0.062	0.03	0.478	0.299	0.336	0.207
OTU1050	0.348	10.16	0.697238	0.876183	NotSig	Bacteria	Firmicutes	Clostridia	Unassigned	Unassigned	Unassigned	0.113	0.097	0.022	0.271	0.002	0.016	0.052	0.003	0.531	0.045	0.057	0.135	0.032	0.05	0.042	0	0.057	0.036	0.395	0.323	0.022	0.016
OTU20	-0.341	10.101	0.698088	0.876622	NotSig	Bacteria	Firmicutes	Negativicutes	Selenomonadales	Veillonellaceae	Anaerovibrio	0.106	0.122	0.251	0.208	0.02	0.019	0.02	0.015	0.038	0.422	0.04	0.026	0.007	0.011	0.243	0.005	0.01	0.023	0.819	0.009	0.067	0.026
OTU1054	0.609	5.737	0.700931	0.877752	NotSig	Bacteria	Firmicutes	Clostridia	Clostridiales	Ruminococcaceae	Unassigned	0.001	0.001	0	0.007	0	0	0	0.005	0	0	0	0	0.007	0	0	0	0	0	0	0	0	0
OTU95	0.385	8.494	0.701239	0.877752	NotSig	Bacteria	Spirochaetes	Spirochaetia	Spirochaetales	Spirochaetaceae	Treponema	0.034	0.023	0.033	0.005	0.092	0.068	0	0.068	0.039	0.01	0.02	0	0.011	0.005	0.145	0	0	0.003	0.011	0.002	0.04	0.012
OTU329	-0.35	6.306	0.701927	0.877752	NotSig	Bacteria	Unassigned	Unassigned	Unassigned	Unassigned	Unassigned	0.003	0.004	0.007	0.01	0.002	0	0	0.005	0	0	0	0.008	0.005	0	0.007	0.002	0	0	0.009	0.009	0.002	0.002
OTU1633	-0.485	6	0.70196	0.877752	NotSig	Bacteria	Firmicutes	Clostridia	Clostridiales	Lachnospiraceae	Unassigned	0.002	0.002	0.002	0	0.009	0	0.002	0	0	0	0	0.002	0	0	0.002	0	0	0	0.02	0.002	0	0
OTU275	0.452	5.591	0.701978	0.877752	NotSig	Bacteria	Unassigned	Unassigned	Unassigned	Unassigned	Unassigned	0	0	0	0.005	0	0	0	0	0	0	0	0	0	0	0	0	0	0	0	0	0	0.002
OTU877	0.26	6.564	0.702453	0.877752	NotSig	Bacteria	Firmicutes	Clostridia	Clostridiales	Ruminococcaceae	Unassigned	0.006	0.004	0.014	0.002	0.002	0.002	0.009	0.008	0.006	0.004	0.002	0.006	0.005	0.002	0.005	0.009	0.005	0.005	0.006	0.004	0	0
OTU1150	0.463	6.577	0.702503	0.877752	NotSig	Bacteria	Firmicutes	Clostridia	Clostridiales	Ruminococcaceae	Oscillibacter	0.006	0.005	0.012	0.022	0.016	0	0.002	0	0.006	0	0.005	0	0	0	0.002	0	0	0.005	0.04	0	0	0
OTU727	0.467	6.85	0.703721	0.878141	NotSig	Bacteria	Firmicutes	Clostridia	Clostridiales	Unassigned	Unassigned	0.01	0.006	0	0	0	0	0	0.028	0	0.02	0.05	0	0.007	0	0.007	0	0.008	0.003	0	0	0.025	0.007
OTU1474	-0.255	8.026	0.703819	0.878141	NotSig	Bacteria	Firmicutes	Clostridia	Clostridiales	Lachnospiraceae	Blautia	0.021	0.023	0.005	0.012	0	0.023	0.022	0.036	0.013	0.024	0.052	0.022	0.016	0.02	0.02	0.002	0.013	0.043	0.02	0.03	0.03	0.04
OTU521	0.439	6.758	0.705714	0.879878	NotSig	Bacteria	Bacteroidetes	Bacteroidia	Bacteroidales	Prevotellaceae	Prevotella	0.007	0.006	0.005	0.027	0.043	0	0	0	0	0	0	0	0.011	0.009	0.005	0	0.005	0	0.02	0	0.002	0.005
OTU177	0.452	5.851	0.706315	0.879999	NotSig	Bacteria	Unassigned	Unassigned	Unassigned	Unassigned	Unassigned	0.002	0.001	0	0.002	0	0	0	0.005	0.002	0	0	0.006	0	0	0	0	0	0	0	0.004	0.005	0
OTU1506	0.443	5.59	0.707231	0.880513	NotSig	Bacteria	Firmicutes	Clostridia	Clostridiales	Ruminococcaceae	Unassigned	0	0	0	0	0.002	0	0	0	0	0.002	0	0	0	0	0	0	0	0	0	0	0	0.002
OTU419	-0.312	9.145	0.709678	0.882931	NotSig	Bacteria	Bacteroidetes	Bacteroidia	Bacteroidales	Porphyromonadaceae	Parabacteroides	0.049	0.057	0.033	0.005	0.09	0.075	0.027	0.01	0	0.077	0.171	0	0.034	0.108	0.042	0.016	0.117	0.104	0.006	0.013	0.12	0.009
OTU372	0.486	11.333	0.710835	0.883035	NotSig	Bacteria	Bacteroidetes	Bacteroidia	Bacteroidales	Bacteroidaceae	Bacteroides	0.23	0.158	0.01	0	0.004	2.223	0	0.051	0	0	0.012	0	0.036	0.018	0.02	0.813	0.047	0.099	0	0.25	0.284	0.016
OTU1112	0.243	7.597	0.711117	0.883035	NotSig	Bacteria	Firmicutes	Clostridia	Clostridiales	Ruminococcaceae	Unassigned	0.018	0.013	0.055	0.012	0.018	0	0.025	0.005	0.009	0.012	0.03	0.01	0.005	0.011	0.012	0.009	0.018	0.015	0.014	0.011	0.025	0.009
OTU1589	0.45	5.886	0.711277	0.883035	NotSig	Bacteria	Firmicutes	Clostridia	Clostridiales	Lachnospiraceae	Unassigned	0.002	0.001	0	0.005	0	0	0	0	0	0	0.01	0.004	0	0	0	0.005	0.003	0.003	0	0	0	0
OTU1612	0.429	5.597	0.712932	0.88446	NotSig	Bacteria	Firmicutes	Clostridia	Clostridiales	Lachnospiraceae	Clostridium_XlVa	0	0	0.002	0	0	0	0	0.003	0	0	0	0	0	0	0	0	0	0	0.003	0	0	0
OTU739	0.255	12.17	0.713595	0.884656	NotSig	Bacteria	Firmicutes	Clostridia	Clostridiales	Ruminococcaceae	Clostridium_IV	0.526	0.384	0.277	0.903	0.101	0.532	0.411	0.061	0.561	0.168	2.037	0.209	0.344	0.165	0.057	0.409	0.739	0.279	0.131	1.141	0.269	0.31
OTU855	0.258	6.76	0.715348	0.886201	NotSig	Bacteria	Firmicutes	Clostridia	Clostridiales	Unassigned	Unassigned	0.007	0.006	0.005	0.005	0.002	0.007	0.007	0.013	0.011	0.012	0.005	0.004	0.018	0.002	0	0.005	0.003	0.003	0	0.002	0.007	0.019
OTU545	0.471	5.663	0.716372	0.88684	NotSig	Bacteria	Bacteroidetes	Bacteroidia	Bacteroidales	Prevotellaceae	Prevotella	0.001	0	0.002	0	0.002	0.002	0	0	0	0	0	0	0.005	0	0	0	0	0	0	0	0	0
OTU1125	-0.253	6.677	0.72269	0.893855	NotSig	Bacteria	Firmicutes	Clostridia	Clostridiales	Ruminococcaceae	Unassigned	0.005	0.007	0.01	0.01	0.004	0.007	0.005	0.003	0.006	0	0.007	0.002	0.007	0.005	0	0.002	0.005	0.013	0.028	0.002	0.002	0.002
OTU1027	0.376	5.846	0.723877	0.893855	NotSig	Bacteria	Firmicutes	Clostridia	Clostridiales	Ruminococcaceae	Unassigned	0.001	0.001	0	0	0.002	0.002	0.005	0	0	0	0.005	0	0.002	0	0.005	0	0	0	0	0.002	0	0
OTU1020	0.408	5.616	0.724329	0.893855	NotSig	Bacteria	Firmicutes	Clostridia	Clostridiales	Ruminococcaceae	Unassigned	0	0	0	0	0	0.002	0	0	0	0	0	0.002	0	0	0.002	0	0	0	0	0	0	0
OTU429	-0.249	9.568	0.724434	0.893855	NotSig	Bacteria	Bacteroidetes	Bacteroidia	Bacteroidales	Porphyromonadaceae	Unassigned	0.072	0.083	0.062	0.208	0.072	0.019	0.068	0.041	0.021	0.187	0.002	0.038	0.254	0.221	0.034	0.016	0.106	0.061	0.028	0.021	0.022	0.068
OTU284	0.402	5.594	0.725333	0.893855	NotSig	Bacteria	Firmicutes	Bacilli	Lactobacillales	Streptococcaceae	Streptococcus	0	0	0	0	0	0	0	0	0	0	0	0.004	0	0	0	0	0	0	0.003	0	0	0
OTU47	-0.243	10.861	0.725343	0.893855	NotSig	Bacteria	Bacteroidetes	Bacteroidia	Bacteroidales	Porphyromonadaceae	Unassigned	0.175	0.205	0.069	0.235	0.027	0.157	0.726	0.056	0.16	0.061	0.146	0.109	0.14	0.316	0.209	0.011	0.267	0.165	0.651	0.132	0.037	0.117
OTU1005	0.401	5.594	0.725618	0.893855	NotSig	Bacteria	Firmicutes	Clostridia	Clostridiales	Ruminococcaceae	Unassigned	0	0	0	0	0	0	0	0	0	0	0.005	0	0	0	0	0	0	0	0.003	0	0	0
OTU1243	0.4	5.594	0.726228	0.893976	NotSig	Bacteria	Firmicutes	Clostridia	Clostridiales	Unassigned	Unassigned	0	0	0	0	0	0	0	0	0	0	0	0.004	0	0	0	0	0	0.003	0	0	0	0
OTU844	0.493	6.299	0.730189	0.897965	NotSig	Bacteria	Firmicutes	Clostridia	Unassigned	Unassigned	Unassigned	0.004	0.002	0.01	0.005	0.011	0	0	0	0	0.006	0	0.01	0	0	0	0	0	0	0	0.024	0	0
OTU664	0.391	5.595	0.730495	0.897965	NotSig	Bacteria	Bacteroidetes	Bacteroidia	Bacteroidales	Unassigned	Unassigned	0	0	0	0	0	0	0	0	0	0	0	0.004	0	0	0	0	0	0	0	0.002	0	0
OTU205	0.364	5.747	0.733198	0.900343	NotSig	Bacteria	Proteobacteria	Gammaproteobacteria	Oceanospirillales	Halomonadaceae	Halomonas	0.001	0.001	0	0	0	0	0	0.003	0	0.002	0.005	0.002	0.002	0	0	0	0	0	0	0	0.005	0
OTU182	0.39	6.098	0.733634	0.900343	NotSig	Bacteria	Unassigned	Unassigned	Unassigned	Unassigned	Unassigned	0.003	0.002	0	0.002	0	0	0	0	0.004	0.002	0.015	0.006	0	0	0	0	0	0	0	0.004	0.01	0.005
OTU477	-0.393	5.991	0.733976	0.900343	NotSig	Bacteria	Bacteroidetes	Bacteroidia	Bacteroidales	Bacteroidaceae	Bacteroides	0.002	0.002	0	0.012	0	0	0	0	0	0.004	0	0.002	0.005	0.009	0	0	0	0	0	0.004	0	0.005
OTU1601	0.379	5.596	0.737285	0.903769	NotSig	Bacteria	Firmicutes	Clostridia	Clostridiales	Clostridiaceae_1	Clostridium_sensu_stricto	0	0	0	0	0.002	0	0	0	0	0.002	0	0	0	0	0	0	0.003	0	0	0	0	0
OTU1394	0.228	7.895	0.740085	0.905464	NotSig	Bacteria	Actinobacteria	Actinobacteria	Unassigned	Unassigned	Unassigned	0.023	0.017	0.019	0.007	0.007	0.021	0.074	0.02	0.008	0.053	0.015	0.002	0.018	0.018	0.007	0.009	0.008	0.023	0.023	0.043	0.002	0.023
OTU644	-0.312	7.264	0.740103	0.905464	NotSig	Bacteria	Bacteroidetes	Unassigned	Unassigned	Unassigned	Unassigned	0.011	0.012	0.065	0.01	0.002	0	0.007	0.01	0.004	0	0.01	0.002	0.005	0.009	0	0.009	0	0	0.04	0.043	0.002	0.009
OTU1400	0.216	8.873	0.740222	0.905464	NotSig	Bacteria	Firmicutes	Clostridia	Clostridiales	Ruminococcaceae	Unassigned	0.048	0.04	0.091	0.063	0.027	0.077	0.036	0.046	0.008	0.041	0.052	0.036	0.045	0.038	0.022	0.005	0.135	0.063	0.031	0.03	0.01	0.019
OTU567	0.389	5.811	0.741719	0.90666	NotSig	Bacteria	Bacteroidetes	Bacteroidia	Bacteroidales	Prevotellaceae	Prevotella	0.001	0.001	0	0.007	0.002	0	0	0.005	0	0	0	0	0.005	0.002	0.002	0	0	0	0	0	0	0
OTU862	-0.251	7.372	0.743197	0.907383	NotSig	Bacteria	Firmicutes	Clostridia	Clostridiales	Unassigned	Unassigned	0.011	0.014	0.019	0.002	0.016	0	0.013	0.01	0.023	0.018	0.007	0.004	0.011	0	0.007	0	0.005	0.008	0.06	0.013	0.02	0.014
OTU336	-0.357	5.718	0.743348	0.907383	NotSig	Bacteria	Spirochaetes	Spirochaetia	Spirochaetales	Spirochaetaceae	Unassigned	0.001	0.001	0	0	0.004	0	0	0	0	0.002	0	0	0.002	0	0	0	0	0.003	0	0	0	0.005
OTU1370	-0.357	5.778	0.745357	0.9092	NotSig	Bacteria	Firmicutes	Clostridia	Clostridiales	Unassigned	Unassigned	0.001	0.001	0.005	0	0	0	0	0.003	0	0	0	0.002	0.002	0.002	0	0	0	0	0.009	0	0	0
OTU478	-0.573	6.411	0.746882	0.909445	NotSig	Bacteria	Bacteroidetes	Bacteroidia	Bacteroidales	Bacteroidaceae	Bacteroides	0.004	0.006	0	0.01	0	0	0	0	0	0.028	0	0	0	0	0	0	0.003	0	0.054	0	0	0
OTU291	-0.243	8.673	0.747024	0.909445	NotSig	Bacteria	Firmicutes	Negativicutes	Selenomonadales	Veillonellaceae	Unassigned	0.034	0.04	0.048	0.039	0.009	0.014	0.041	0	0.015	0.012	0.012	0.153	0.011	0.016	0.02	0.02	0.075	0.081	0.125	0.019	0.02	0.012
OTU398	-0.399	6.985	0.747118	0.909445	NotSig	Bacteria	Bacteroidetes	Unassigned	Unassigned	Unassigned	Unassigned	0.006	0.007	0.01	0	0.013	0.026	0.007	0	0.004	0.002	0.002	0	0	0.005	0	0.048	0	0	0	0	0.015	0
OTU1476	0.42	6.186	0.747649	0.909458	NotSig	Bacteria	Firmicutes	Clostridia	Clostridiales	Ruminococcaceae	Unassigned	0.004	0.002	0	0.029	0	0	0.004	0	0	0	0	0.004	0	0	0.002	0	0.005	0.01	0	0	0.005	0
OTU1046	0.35	5.589	0.749695	0.910684	NotSig	Bacteria	Firmicutes	Clostridia	Clostridiales	Lachnospiraceae	Clostridium_XlVb	0	0	0	0	0	0	0	0	0	0.002	0.002	0	0	0	0	0	0	0	0.003	0	0	0
OTU1675	-0.27	8.686	0.750272	0.910684	NotSig	Bacteria	Firmicutes	Clostridia	Clostridiales	Unassigned	Unassigned	0.034	0.036	0.029	0.022	0.016	0.023	0.025	0.01	0.045	0.063	0.022	0.08	0.032	0.005	0.012	0.007	0.005	0	0	0.237	0.022	0.042
OTU168	0.344	6.383	0.750673	0.910684	NotSig	Bacteria	Firmicutes	Bacilli	Lactobacillales	Leuconostocaceae	Weissella	0.005	0.003	0	0	0.002	0	0.002	0.003	0.002	0	0.03	0.01	0.002	0.002	0	0	0	0.005	0	0.019	0	0.002
OTU732	0.266	15.43	0.750741	0.910684	NotSig	Bacteria	Firmicutes	Clostridia	Clostridiales	Lachnospiraceae	Unassigned	4.804	4.084	2.903	0.922	3.622	0.803	4.483	4.513	7.188	1.855	4.57	17.177	7.366	0.014	6.383	0.034	0.275	0.46	9.437	6.026	0.142	10.705
OTU9	0.347	11.21	0.751621	0.910786	NotSig	Bacteria	Proteobacteria	Deltaproteobacteria	Desulfovibrionales	Desulfovibrionaceae	Desulfovibrio	0.301	0.174	0.007	0	0.007	0.016	0.004	1.92	0.002	0.11	0.942	0.002	0.014	0.269	0.118	0.495	0.223	0.315	0	0.002	0.291	0.016
OTU1558	-0.266	6.471	0.751867	0.910786	NotSig	Bacteria	Firmicutes	Clostridia	Clostridiales	Lachnospiraceae	Unassigned	0.004	0.005	0	0.002	0.004	0	0.002	0.003	0	0.024	0.002	0.006	0.007	0.002	0.002	0	0.008	0.003	0.014	0.011	0.002	0
OTU970	0.338	5.588	0.755401	0.914324	NotSig	Bacteria	Firmicutes	Unassigned	Unassigned	Unassigned	Unassigned	0	0	0	0	0	0	0.002	0	0	0	0	0.002	0	0	0	0	0	0	0.003	0	0	0
OTU889	-0.327	6.054	0.755834	0.914324	NotSig	Bacteria	Firmicutes	Clostridia	Clostridiales	Unassigned	Unassigned	0.002	0.002	0	0.002	0	0	0.002	0	0.004	0	0	0.01	0.002	0.005	0.002	0	0	0	0	0	0.01	0.005
OTU1611	0.336	5.588	0.756449	0.914435	NotSig	Bacteria	Firmicutes	Clostridia	Clostridiales	Lachnospiraceae	Unassigned	0	0	0	0	0	0	0.002	0	0	0	0.002	0	0	0	0	0	0	0.003	0	0	0	0
OTU835	-0.271	7.584	0.757992	0.915667	NotSig	Bacteria	Firmicutes	Clostridia	Clostridiales	Ruminococcaceae	Butyricicoccus	0.015	0.017	0.022	0.015	0.007	0.007	0.004	0.015	0.004	0.004	0.074	0	0	0.011	0	0	0.07	0.036	0.028	0.006	0.005	0.012
OTU1577	-0.408	5.743	0.758835	0.916052	NotSig	Bacteria	Firmicutes	Clostridia	Clostridiales	Ruminococcaceae	Unassigned	0.001	0.001	0	0	0	0	0.005	0	0	0	0	0.002	0.007	0	0	0	0	0	0	0	0	0.005
OTU1511	-0.286	7.308	0.760794	0.917206	NotSig	Bacteria	Firmicutes	Clostridia	Clostridiales	Lachnospiraceae	Unassigned	0.011	0.013	0.002	0.019	0	0.002	0	0	0.021	0.006	0.052	0.006	0.002	0.005	0.01	0	0.036	0.028	0.02	0.002	0.022	0
OTU425	-0.352	6.1	0.76084	0.917206	NotSig	Bacteria	Bacteroidetes	Unassigned	Unassigned	Unassigned	Unassigned	0.002	0.003	0	0	0	0.002	0.014	0.003	0.002	0	0	0	0.016	0.007	0	0	0	0	0.006	0	0	0.002
OTU110	-0.281	8.588	0.761917	0.917871	NotSig	Bacteria	Spirochaetes	Spirochaetia	Spirochaetales	Spirochaetaceae	Treponema	0.029	0.036	0.022	0.012	0.076	0.009	0.002	0.036	0.071	0.043	0	0.02	0.061	0.016	0.015	0	0.003	0	0.02	0.192	0.002	0.047
OTU1677	-0.26	7.854	0.764066	0.919291	NotSig	Bacteria	Actinobacteria	Actinobacteria	Coriobacteriales	Coriobacteriaceae	Unassigned	0.018	0.02	0.005	0.012	0	0.014	0.065	0.008	0	0	0.032	0.046	0.007	0.023	0.007	0.023	0.026	0.061	0.034	0	0.012	0.007
OTU932	-0.418	6.075	0.764148	0.919291	NotSig	Bacteria	Firmicutes	Clostridia	Clostridiales	Ruminococcaceae	Unassigned	0.002	0.002	0	0	0.002	0.012	0	0	0	0	0.002	0	0	0	0	0	0.005	0	0	0.006	0.012	0
OTU687	-0.321	9.774	0.765376	0.919937	NotSig	Bacteria	Bacteroidetes	Bacteroidia	Bacteroidales	Porphyromonadaceae	Unassigned	0.078	0.101	0.065	0.157	0.029	0.012	0.054	0	0.002	0.055	0.002	0.4	0.079	0.02	0	0	0.005	0.003	0.68	0.197	0	0.031
OTU139	-0.348	7.015	0.765737	0.919937	NotSig	Bacteria	Unassigned	Unassigned	Unassigned	Unassigned	Unassigned	0.009	0.008	0	0.005	0	0	0	0.008	0	0	0.059	0.014	0	0.014	0	0.039	0	0.008	0.003	0.002	0.002	0.009
OTU1679	0.269	7.193	0.766496	0.920217	NotSig	Bacteria	Firmicutes	Clostridia	Clostridiales	Unassigned	Unassigned	0.01	0.01	0.01	0.002	0.007	0	0.009	0.005	0.043	0.016	0	0.012	0.016	0.023	0	0	0	0	0.017	0.021	0.005	0.014
OTU1218	-0.173	10.387	0.768901	0.92247	NotSig	Bacteria	Actinobacteria	Actinobacteria	Coriobacteriales	Coriobacteriaceae	Unassigned	0.126	0.137	0.079	0.107	0.09	0.11	0.122	0.112	0.131	0.225	0.164	0.119	0.163	0.267	0.052	0.045	0.101	0.137	0.04	0.241	0.132	0.19
OTU715	-0.193	10.734	0.770806	0.924121	NotSig	Bacteria	Firmicutes	Clostridia	Clostridiales	Ruminococcaceae	Oscillibacter	0.166	0.186	0.27	0.119	0.146	0.061	0.108	0.249	0.073	0.156	0.27	0.213	0.102	0.167	0.027	0.036	0.511	0.432	0.421	0.017	0.077	0.073
OTU759	0.277	6.075	0.771446	0.924255	NotSig	Bacteria	Actinobacteria	Actinobacteria	Actinomycetales	Corynebacteriaceae	Corynebacterium	0.002	0.002	0	0	0.007	0	0.005	0	0.006	0.004	0.002	0	0	0	0.002	0	0	0.003	0	0.006	0.002	0.005
OTU958	-0.263	6.12	0.772531	0.924431	NotSig	Bacteria	Firmicutes	Clostridia	Clostridiales	Unassigned	Unassigned	0.002	0.003	0	0.002	0.004	0	0.005	0	0	0.012	0	0	0.009	0.005	0.002	0	0.005	0	0.003	0.002	0	0.002
OTU178	-0.354	6.014	0.772651	0.924431	NotSig	Bacteria	Unassigned	Unassigned	Unassigned	Unassigned	Unassigned	0.002	0.002	0.012	0.002	0	0	0	0.005	0	0	0	0	0	0	0.005	0	0	0	0.006	0	0.002	0.009
OTU1291	-0.244	7.78	0.775466	0.926097	NotSig	Bacteria	Firmicutes	Clostridia	Clostridiales	Lachnospiraceae	Blautia	0.018	0.019	0	0	0	0.007	0.014	0.01	0.002	0.039	0.089	0.02	0.002	0.014	0.032	0.002	0.016	0.033	0.028	0.002	0.027	0.031
OTU1164	-0.265	7.182	0.775611	0.926097	NotSig	Bacteria	Firmicutes	Clostridia	Clostridiales	Unassigned	Unassigned	0.009	0.011	0	0.024	0.011	0.023	0	0.02	0.004	0.002	0	0.004	0.002	0.002	0.032	0	0.008	0.015	0.028	0.002	0	0.016
OTU414	0.237	9.759	0.775633	0.926097	NotSig	Bacteria	Bacteroidetes	Bacteroidia	Bacteroidales	Prevotellaceae	Prevotella	0.09	0.07	0.067	0.249	0.031	0.117	0.018	0.033	0.09	0.085	0.05	0.159	0.043	0	0.01	0	0.039	0.058	0.026	0.389	0.105	0.026
OTU1376	0.266	8.591	0.777188	0.927223	NotSig	Bacteria	Firmicutes	Clostridia	Clostridiales	Lachnospiraceae	Unassigned	0.04	0.031	0.033	0.002	0.031	0.002	0.03	0.018	0.043	0.177	0.02	0.04	0.093	0.016	0.027	0	0	0	0	0.083	0.002	0.092
OTU1025	0.404	5.818	0.777637	0.927223	NotSig	Bacteria	Firmicutes	Clostridia	Clostridiales	Unassigned	Unassigned	0.001	0.001	0	0	0	0.009	0	0	0	0	0.002	0	0	0.005	0	0	0.003	0.003	0	0	0	0
OTU187	-0.429	6.516	0.778783	0.927507	NotSig	Bacteria	Proteobacteria	Deltaproteobacteria	Desulfovibrionales	Desulfovibrionaceae	Desulfovibrio	0.003	0.005	0	0	0	0.028	0	0	0	0	0.005	0	0	0.027	0.002	0.014	0	0	0	0	0.005	0
OTU1333	0.238	9.814	0.778936	0.927507	NotSig	Bacteria	Firmicutes	Clostridia	Clostridiales	Ruminococcaceae	Gemmiger	0.102	0.085	0.27	0.063	0.081	0	0.197	0.089	0.019	0.039	0.119	0.145	0.115	0.486	0.012	0	0.01	0.008	0.045	0.092	0.005	0.077
OTU1244	-0.262	7.722	0.781463	0.929732	NotSig	Bacteria	Firmicutes	Clostridia	Clostridiales	Lachnospiraceae	Unassigned	0.017	0.019	0	0.044	0.002	0	0.02	0.003	0.006	0.081	0.007	0.01	0.023	0.002	0.027	0	0	0	0.034	0.011	0.025	0.063
OTU735	-0.202	12.254	0.781869	0.929732	NotSig	Bacteria	Firmicutes	Clostridia	Clostridiales	Clostridiaceae_1	Clostridium_sensu_stricto	0.466	0.507	0.519	0.237	0.173	0.141	0.416	0.147	0.817	1.163	0.513	0.533	0.048	0.129	0.13	0.023	0.454	0.394	1.521	1.996	0.184	0.195
OTU267	0.21	7.444	0.783117	0.930584	NotSig	Bacteria	Firmicutes	Negativicutes	Selenomonadales	Acidaminococcaceae	Phascolarctobacterium	0.014	0.012	0.019	0.031	0.007	0.023	0.007	0.036	0.008	0.004	0.005	0.004	0.016	0.009	0	0	0.016	0.033	0.014	0.026	0	0.009
OTU840	-0.333	7.282	0.786228	0.933646	NotSig	Bacteria	Firmicutes	Clostridia	Clostridiales	Ruminococcaceae	Unassigned	0.008	0.014	0	0	0	0.009	0.005	0	0.058	0.002	0.005	0	0.007	0.047	0	0	0	0.015	0.054	0	0	0.016
OTU1607	0.268	6.352	0.787482	0.9345	NotSig	Bacteria	Firmicutes	Clostridia	Clostridiales	Lachnospiraceae	Unassigned	0.004	0.003	0.005	0	0.013	0	0.002	0	0.004	0.006	0	0.01	0.002	0.016	0.007	0	0	0	0.006	0	0	0.002
OTU886	-0.296	6.108	0.789115	0.935322	NotSig	Bacteria	Firmicutes	Clostridia	Clostridiales	Ruminococcaceae	Unassigned	0.002	0.002	0	0.002	0	0	0.009	0.008	0.002	0.002	0	0	0.005	0	0.012	0	0	0	0.003	0.004	0	0
OTU1576	0.321	5.649	0.790806	0.935322	NotSig	Bacteria	Firmicutes	Clostridia	Clostridiales	Unassigned	Unassigned	0.001	0	0.005	0	0	0	0	0	0	0	0.002	0	0.002	0	0	0	0	0	0	0	0	0.002
OTU113	0.364	7.922	0.791303	0.935322	NotSig	Bacteria	Spirochaetes	Spirochaetia	Spirochaetales	Spirochaetaceae	Treponema	0.024	0.015	0.002	0.01	0.027	0.014	0.002	0	0	0.093	0.037	0.054	0	0	0	0	0	0	0	0.147	0	0
OTU755	-0.186	8.288	0.791482	0.935322	NotSig	Bacteria	Actinobacteria	Actinobacteria	Coriobacteriales	Coriobacteriaceae	Unassigned	0.028	0.028	0.007	0.019	0.004	0.012	0.045	0.066	0.011	0.065	0.042	0.006	0.027	0.032	0.002	0.032	0.018	0.02	0.003	0.028	0.045	0.068
OTU1101	0.171	9.161	0.791778	0.935322	NotSig	Bacteria	Firmicutes	Clostridia	Clostridiales	Ruminococcaceae	Oscillibacter	0.058	0.049	0.074	0.027	0.061	0.03	0.045	0.028	0.058	0.14	0.032	0.082	0.02	0.023	0.017	0.039	0.031	0.033	0.193	0.06	0.062	0.014
OTU626	-0.216	9.391	0.792865	0.935322	NotSig	Bacteria	Firmicutes	Erysipelotrichia	Erysipelotrichales	Erysipelotrichaceae	Unassigned	0.057	0.065	0.062	0.063	0.016	0.014	0.013	0.053	0.173	0.081	0.055	0.042	0.038	0.077	0.005	0	0.065	0.043	0.04	0.323	0	0.056
OTU1048	0.216	8.83	0.793143	0.935322	NotSig	Bacteria	Firmicutes	Clostridia	Clostridiales	Ruminococcaceae	Unassigned	0.048	0.04	0.019	0.007	0.011	0.012	0.133	0.061	0.051	0.152	0.012	0.018	0.134	0.036	0.002	0.005	0	0.003	0.009	0.077	0.027	0.108
OTU361	-0.19	6.177	0.793156	0.935322	NotSig	Bacteria	Firmicutes	Clostridia	Unassigned	Unassigned	Unassigned	0.003	0.003	0.002	0.005	0	0.005	0	0	0	0.004	0.007	0.004	0.002	0.002	0.002	0	0.005	0.003	0.003	0.004	0.002	0.005
OTU141	0.25	6.752	0.79322	0.935322	NotSig	Bacteria	Unassigned	Unassigned	Unassigned	Unassigned	Unassigned	0.007	0.006	0.002	0.017	0.004	0	0	0.028	0	0	0	0.022	0.002	0	0.005	0	0.003	0.013	0.011	0.009	0.007	0.007
OTU165	0.428	5.938	0.793526	0.935322	NotSig	Bacteria	Proteobacteria	Deltaproteobacteria	Desulfovibrionales	Desulfovibrionaceae	Desulfovibrio	0.002	0.001	0.002	0	0.011	0	0.005	0	0	0	0	0	0	0	0	0.009	0	0	0	0	0	0
OTU1451	0.209	8.526	0.79774	0.939266	NotSig	Bacteria	Firmicutes	Clostridia	Clostridiales	Unassigned	Unassigned	0.034	0.031	0.048	0.022	0.011	0	0.004	0.018	0.105	0.083	0.007	0.044	0.057	0.025	0.039	0	0.008	0.015	0.088	0.041	0.002	0.035
OTU1422	0.185	7.096	0.797946	0.939266	NotSig	Bacteria	Firmicutes	Clostridia	Clostridiales	Ruminococcaceae	Unassigned	0.01	0.008	0.017	0.002	0.018	0.007	0.022	0.003	0.002	0.008	0.02	0.006	0.014	0	0.002	0.005	0.008	0.005	0	0.015	0.02	0.014
OTU277	0.174	11.669	0.801373	0.942064	NotSig	Bacteria	Firmicutes	Negativicutes	Selenomonadales	Acidaminococcaceae	Phascolarctobacterium	0.378	0.319	1.074	0.165	0.315	0.028	0.143	0.731	0.068	0.719	0.213	0.326	0.419	0.481	0.364	0.054	0.233	0.162	1.149	0.064	0.05	0.209
OTU229	-0.279	5.741	0.801401	0.942064	NotSig	Bacteria	Unassigned	Unassigned	Unassigned	Unassigned	Unassigned	0.001	0.001	0	0	0.002	0.002	0	0	0.002	0	0	0	0.002	0	0	0	0	0.008	0	0	0	0
OTU848	0.193	7.369	0.802919	0.943213	NotSig	Bacteria	Unassigned	Unassigned	Unassigned	Unassigned	Unassigned	0.014	0.012	0.01	0.019	0.004	0	0.036	0.01	0	0.037	0.005	0.022	0.011	0.011	0.005	0.002	0.003	0	0.031	0.009	0.015	0.031
OTU1170	0.344	5.849	0.803544	0.943314	NotSig	Bacteria	Firmicutes	Unassigned	Unassigned	Unassigned	Unassigned	0.001	0.001	0	0	0.009	0	0.005	0	0	0	0	0	0.007	0	0	0	0	0	0	0	0.002	0.002
OTU665	0.451	5.742	0.805698	0.944805	NotSig	Bacteria	Unassigned	Unassigned	Unassigned	Unassigned	Unassigned	0.001	0	0	0	0	0	0	0	0	0	0.012	0	0	0	0	0.005	0	0	0	0	0	0
OTU1229	0.19	8.392	0.806266	0.944805	NotSig	Bacteria	Firmicutes	Clostridia	Clostridiales	Ruminococcaceae	Unassigned	0.032	0.027	0.014	0.022	0.007	0.007	0.022	0.013	0.064	0.085	0.04	0.046	0.041	0.007	0.01	0.007	0.008	0.003	0.057	0.094	0	0.045
OTU121	0.209	8.802	0.806644	0.944805	NotSig	Bacteria	Firmicutes	Bacilli	Bacillales	Staphylococcaceae	Staphylococcus	0.048	0.036	0.017	0.029	0	0	0.152	0.028	0.009	0.032	0.126	0.091	0.027	0.059	0.007	0.002	0.003	0.005	0.037	0.15	0.022	0.052
OTU183	0.289	5.64	0.806976	0.944805	NotSig	Bacteria	Proteobacteria	Deltaproteobacteria	Desulfovibrionales	Desulfovibrionaceae	Desulfovibrio	0.001	0	0	0	0.002	0	0.002	0	0	0.002	0	0	0.005	0	0	0	0	0	0	0	0	0
OTU1063	-0.228	7.152	0.813184	0.950745	NotSig	Bacteria	Firmicutes	Clostridia	Clostridiales	Ruminococcaceae	Unassigned	0.01	0.01	0	0.007	0	0.014	0.002	0.005	0	0.053	0.015	0.002	0.002	0.061	0	0.014	0.003	0	0.003	0.004	0.01	0.007
OTU956	0.247	5.872	0.813642	0.950745	NotSig	Bacteria	Firmicutes	Clostridia	Clostridiales	Unassigned	Unassigned	0.002	0.001	0.002	0	0.007	0	0.002	0	0	0	0.002	0.002	0	0.002	0	0	0	0	0.009	0	0.002	0
OTU122	0.203	9.02	0.813681	0.950745	NotSig	Bacteria	Unassigned	Unassigned	Unassigned	Unassigned	Unassigned	0.053	0.043	0.012	0.053	0.022	0.007	0	0.117	0.021	0.01	0.03	0.253	0.036	0.018	0	0.027	0.018	0.048	0.003	0.132	0.02	0.122
OTU1586	-0.32	5.639	0.814395	0.950944	NotSig	Bacteria	Firmicutes	Clostridia	Clostridiales	Lachnospiraceae	Unassigned	0	0	0	0	0	0	0	0	0	0.002	0.002	0	0	0	0	0.002	0.003	0	0	0	0	0
OTU923	0.175	10.6	0.817483	0.953913	NotSig	Bacteria	Firmicutes	Clostridia	Clostridiales	Lachnospiraceae	Unassigned	0.179	0.154	0.524	0.14	0.171	0.016	0.056	0.005	0.053	0.708	0.064	0.056	0.122	0.108	0.037	0.005	0.098	0.112	0.714	0.079	0.14	0.124
OTU679	-0.264	8.902	0.818602	0.954581	NotSig	Bacteria	Bacteroidetes	Bacteroidia	Bacteroidales	Porphyromonadaceae	Unassigned	0.046	0.047	0	0	0	0	0.195	0.03	0.002	0.018	0.218	0	0.007	0.21	0.039	0.011	0.036	0.028	0.011	0	0.127	0
OTU1636	-0.266	5.936	0.820191	0.955796	NotSig	Bacteria	Firmicutes	Clostridia	Clostridiales	Lachnospiraceae	Unassigned	0.001	0.002	0.002	0	0	0	0	0.003	0	0	0	0.01	0.009	0	0.002	0	0	0	0.006	0	0	0.002
OTU237	0.28	5.68	0.822238	0.956869	NotSig	Bacteria	Unassigned	Unassigned	Unassigned	Unassigned	Unassigned	0.001	0	0.002	0	0	0.002	0	0.003	0	0	0	0	0	0	0	0	0	0	0	0	0.005	0
OTU1294	0.177	7.01	0.822859	0.956869	NotSig	Bacteria	Actinobacteria	Actinobacteria	Coriobacteriales	Coriobacteriaceae	Unassigned	0.009	0.008	0.002	0.005	0.004	0.009	0.004	0.008	0.009	0.045	0.007	0	0.014	0.002	0.002	0.002	0	0.01	0.02	0.011	0	0.021
OTU91	-0.252	9.704	0.82353	0.956869	NotSig	Bacteria	Spirochaetes	Spirochaetia	Spirochaetales	Spirochaetaceae	Treponema	0.075	0.094	0.002	0.228	0.011	0.101	0.004	0	0	0.069	0.079	0.253	0.387	0	0.064	0	0	0	0.014	0.013	0.067	0.397
OTU1609	0.191	5.592	0.823822	0.956869	NotSig	Bacteria	Firmicutes	Clostridia	Clostridiales	Ruminococcaceae	Unassigned	0	0	0	0	0	0	0.002	0	0	0.002	0	0	0	0	0.002	0	0	0	0	0	0	0
OTU1436	0.227	6.727	0.823892	0.956869	NotSig	Bacteria	Firmicutes	Clostridia	Clostridiales	Ruminococcaceae	Unassigned	0.006	0.005	0	0.002	0.007	0	0.005	0.003	0.021	0.008	0.005	0.012	0.005	0	0	0	0	0	0.003	0.028	0	0.019
OTU1425	0.186	7.317	0.824396	0.956869	NotSig	Bacteria	Firmicutes	Clostridia	Clostridiales	Lachnospiraceae	Clostridium_XlVa	0.013	0.011	0.043	0.015	0.027	0.002	0.011	0	0.002	0.002	0.015	0.014	0.002	0.002	0.005	0	0.041	0.005	0.02	0.013	0.017	0
OTU779	0.17	7.743	0.825655	0.957297	NotSig	Bacteria	Firmicutes	Clostridia	Clostridiales	Unassigned	Unassigned	0.018	0.016	0.005	0.017	0.009	0.012	0.007	0.051	0.028	0.022	0.005	0.026	0.014	0.011	0.002	0.002	0.044	0	0.017	0.038	0	0.031
OTU680	0.202	7.385	0.826306	0.957297	NotSig	Bacteria	Bacteroidetes	Bacteroidia	Bacteroidales	Porphyromonadaceae	Unassigned	0.013	0.012	0.005	0.031	0.011	0	0.014	0.028	0.038	0	0	0.002	0.002	0.032	0.005	0	0.018	0.023	0.009	0.002	0.025	0
OTU1177	0.249	5.81	0.826804	0.957297	NotSig	Bacteria	Firmicutes	Clostridia	Clostridiales	Ruminococcaceae	Unassigned	0.001	0.001	0.002	0	0	0.002	0.004	0	0	0	0.005	0	0	0	0	0	0	0.005	0	0.004	0	0
OTU404	0.163	9.268	0.827034	0.957297	NotSig	Bacteria	Bacteroidetes	Unassigned	Unassigned	Unassigned	Unassigned	0.056	0.053	0.038	0.031	0.038	0.234	0.032	0.058	0	0.02	0.035	0.074	0.156	0.079	0.079	0.043	0.021	0.033	0.02	0.011	0.03	0.059
OTU1533	-0.18	6.038	0.827787	0.957297	NotSig	Bacteria	Firmicutes	Clostridia	Clostridiales	Lachnospiraceae	Unassigned	0.002	0.002	0	0.002	0	0.005	0.002	0.003	0	0.002	0.002	0.004	0	0	0	0	0.005	0.005	0.009	0.002	0	0.002
OTU1320	0.245	5.938	0.828051	0.957297	NotSig	Bacteria	Unassigned	Unassigned	Unassigned	Unassigned	Unassigned	0.002	0.001	0.007	0	0	0	0	0	0	0.004	0.002	0.006	0.007	0	0.005	0	0	0	0	0	0.002	0
OTU16	-0.144	12.104	0.828933	0.957683	NotSig	Bacteria	Unassigned	Unassigned	Unassigned	Unassigned	Unassigned	0.459	0.438	0.21	1.361	0.146	0.014	0.03	0.695	0.321	0.589	0.84	0.384	0.367	0.662	0.364	0.379	0.575	0.604	0.168	0.333	0.473	0.458
OTU846	0.21	7.278	0.830057	0.957798	NotSig	Bacteria	Firmicutes	Clostridia	Clostridiales	Unassigned	Unassigned	0.013	0.01	0	0.005	0.002	0	0.07	0.028	0.009	0.006	0.007	0.002	0.016	0.005	0.005	0	0	0	0.009	0	0.042	0.028
OTU1154	0.256	5.88	0.830972	0.957798	NotSig	Bacteria	Synergistetes	Synergistia	Synergistales	Synergistaceae	Pyramidobacter	0.002	0.001	0	0.002	0	0	0.013	0	0	0.002	0	0	0.005	0	0.005	0	0	0	0.003	0	0	0
OTU1464	0.225	6.355	0.83098	0.957798	NotSig	Bacteria	Firmicutes	Clostridia	Clostridiales	Ruminococcaceae	Unassigned	0.004	0.004	0.007	0	0.004	0	0.014	0	0.009	0	0.005	0	0.007	0	0	0.002	0	0	0.006	0.002	0	0.019
OTU210	0.255	5.665	0.831224	0.957798	NotSig	Bacteria	Unassigned	Unassigned	Unassigned	Unassigned	Unassigned	0.001	0	0	0	0	0	0	0	0.002	0	0	0.004	0	0	0	0	0	0	0.003	0.002	0	0
OTU1299	0.36	6.098	0.831773	0.957799	NotSig	Bacteria	Firmicutes	Clostridia	Clostridiales	Unassigned	Unassigned	0.003	0.002	0	0.01	0	0	0	0	0	0	0	0.018	0.014	0	0	0	0	0	0	0	0	0.009
OTU984	0.155	7.728	0.832338	0.957819	NotSig	Bacteria	Firmicutes	Clostridia	Clostridiales	Lachnospiraceae	Unassigned	0.018	0.016	0.036	0.01	0.061	0.014	0.014	0.008	0	0.018	0.007	0.012	0.018	0.009	0.015	0.011	0.034	0.013	0.037	0.009	0.01	0
OTU1641	0.203	6.45	0.833646	0.958674	NotSig	Bacteria	Firmicutes	Clostridia	Clostridiales	Lachnospiraceae	Unassigned	0.005	0.004	0.002	0	0	0	0.004	0.003	0	0.037	0.005	0.002	0.018	0	0.002	0	0	0.003	0.003	0.002	0.002	0.012
OTU1571	-0.18	5.822	0.834178	0.958674	NotSig	Bacteria	Firmicutes	Clostridia	Clostridiales	Lachnospiraceae	Unassigned	0.001	0.001	0	0	0.002	0	0.002	0.003	0.002	0	0.002	0	0.002	0	0.002	0	0	0.003	0.003	0.002	0	0
OTU1130	-0.2	6.07	0.836736	0.960981	NotSig	Bacteria	Firmicutes	Unassigned	Unassigned	Unassigned	Unassigned	0.002	0.002	0	0	0	0.005	0.009	0.008	0	0	0	0	0.007	0	0.002	0	0.005	0.003	0	0.002	0.002	0.002
OTU1031	0.19	9.437	0.840669	0.964865	NotSig	Bacteria	Firmicutes	Clostridia	Clostridiales	Ruminococcaceae	Unassigned	0.076	0.068	0.122	0.012	0.054	0.002	0.351	0.041	0.017	0.059	0.015	0.086	0.048	0.043	0.039	0	0	0	0.503	0.021	0.005	0.021
OTU750	-0.293	5.571	0.841907	0.965652	NotSig	Bacteria	Actinobacteria	Actinobacteria	Actinomycetales	Actinomycetaceae	Trueperella	0	0	0	0	0	0	0	0	0	0.002	0	0	0	0	0	0.002	0	0	0	0	0	0
OTU1200	-0.28	5.566	0.845432	0.968542	NotSig	Bacteria	Firmicutes	Clostridia	Clostridiales	Lachnospiraceae	Unassigned	0	0	0	0	0	0	0.002	0	0	0	0	0	0	0	0.002	0	0	0	0	0	0	0
OTU1655	0.239	6.47	0.845535	0.968542	NotSig	Bacteria	Firmicutes	Clostridia	Clostridiales	Clostridiaceae_1	Clostridium_sensu_stricto	0.004	0.004	0.005	0.005	0	0	0	0.003	0.021	0.01	0	0.002	0	0	0	0	0	0.005	0.003	0.028	0	0
OTU1193	-0.159	7.795	0.849683	0.972657	NotSig	Bacteria	Firmicutes	Clostridia	Clostridiales	Lachnospiraceae	Unassigned	0.016	0.02	0.019	0.012	0	0.005	0.005	0.013	0.036	0.004	0.007	0.062	0.007	0.007	0.007	0	0.065	0.043	0.057	0.004	0.002	0.005
OTU988	-0.25	5.643	0.850599	0.973067	NotSig	Bacteria	Firmicutes	Clostridia	Clostridiales	Lachnospiraceae	Clostridium_XlVb	0	0	0	0.005	0	0	0	0	0	0	0	0	0	0	0.002	0	0	0	0	0	0.002	0
OTU78	-0.265	5.567	0.852621	0.974742	NotSig	Bacteria	Proteobacteria	Deltaproteobacteria	Desulfovibrionales	Desulfovibrionaceae	Desulfovibrio	0	0	0	0	0	0	0	0	0	0.002	0	0	0	0	0.002	0	0	0	0	0	0	0
OTU1602	0.212	5.661	0.853535	0.97515	NotSig	Bacteria	Firmicutes	Clostridia	Clostridiales	Ruminococcaceae	Clostridium_IV	0.001	0.001	0	0.002	0	0	0	0	0	0	0	0.004	0	0	0	0	0.003	0.003	0	0	0	0
OTU1302	0.176	6.236	0.855934	0.977252	NotSig	Bacteria	Firmicutes	Clostridia	Clostridiales	Unassigned	Unassigned	0.003	0.003	0	0	0	0	0.002	0.01	0.008	0.01	0	0.004	0.009	0.002	0	0	0.003	0	0.003	0.002	0	0.012
OTU959	0.228	5.758	0.856933	0.977754	NotSig	Bacteria	Firmicutes	Clostridia	Clostridiales	Unassigned	Unassigned	0.001	0.001	0	0	0	0	0.009	0	0	0.002	0	0	0	0.002	0.005	0	0	0	0	0	0	0
OTU1718	-0.178	5.672	0.859952	0.980558	NotSig	Bacteria	Actinobacteria	Actinobacteria	Coriobacteriales	Coriobacteriaceae	Unassigned	0.001	0.001	0	0	0	0	0.002	0	0	0.002	0	0.002	0.002	0	0	0	0	0	0.003	0	0	0.002
OTU214	-0.231	5.651	0.861414	0.981419	NotSig	Bacteria	Unassigned	Unassigned	Unassigned	Unassigned	Unassigned	0	0	0	0	0.002	0	0	0	0	0	0	0.002	0	0	0	0.002	0	0	0	0	0.002	0
OTU1038	0.148	7.057	0.861829	0.981419	NotSig	Bacteria	Firmicutes	Clostridia	Clostridiales	Ruminococcaceae	Ruminococcus	0.01	0.008	0.007	0	0.002	0.007	0.014	0.028	0.008	0	0.015	0.016	0.002	0.009	0	0	0.008	0.005	0.023	0.03	0	0.007
OTU585	0.263	6.66	0.863932	0.983126	NotSig	Bacteria	Bacteroidetes	Bacteroidia	Bacteroidales	Prevotellaceae	Prevotella	0.007	0.006	0	0	0	0	0	0.005	0	0.067	0	0	0.045	0	0.002	0	0	0.005	0	0	0	0.005
OTU1551	-0.188	5.681	0.864733	0.983126	NotSig	Bacteria	Firmicutes	Clostridia	Clostridiales	Ruminococcaceae	Unassigned	0.001	0.001	0	0	0.002	0	0.004	0	0	0	0	0	0.002	0	0	0	0	0.003	0	0.002	0	0
OTU657	0.235	6.054	0.865948	0.983126	NotSig	Bacteria	Bacteroidetes	Bacteroidia	Bacteroidales	Porphyromonadaceae	Unassigned	0.002	0.002	0.005	0.002	0.011	0	0	0	0	0.006	0	0	0.002	0	0	0	0	0	0	0.015	0	0
OTU997	-0.215	5.627	0.866051	0.983126	NotSig	Bacteria	Firmicutes	Unassigned	Unassigned	Unassigned	Unassigned	0	0.001	0.002	0	0	0	0	0	0	0.002	0	0	0	0	0	0	0.003	0.003	0	0	0	0
OTU1424	-0.193	6.613	0.866141	0.983126	NotSig	Bacteria	Firmicutes	Clostridia	Clostridiales	Lachnospiraceae	Unassigned	0.005	0.005	0	0	0	0	0.002	0.02	0.006	0	0.027	0	0	0.009	0.01	0.009	0.003	0.003	0.02	0	0	0
OTU1409	0.143	6.683	0.86809	0.984464	NotSig	Bacteria	Firmicutes	Clostridia	Clostridiales	Lachnospiraceae	Unassigned	0.007	0.006	0.007	0.024	0.002	0	0.004	0.013	0.002	0.008	0.002	0.006	0.007	0	0	0	0	0	0.006	0.011	0.007	0.026
OTU437	0.13	7.452	0.868613	0.984464	NotSig	Bacteria	Bacteroidetes	Unassigned	Unassigned	Unassigned	Unassigned	0.014	0.012	0.007	0.005	0.029	0.014	0.025	0.025	0.002	0.018	0.007	0.008	0.05	0	0.015	0.009	0	0	0.011	0.015	0.002	0.021
OTU1469	-0.116	6.764	0.869009	0.984464	NotSig	Bacteria	Firmicutes	Clostridia	Clostridiales	Lachnospiraceae	Unassigned	0.006	0.007	0.002	0.007	0.004	0	0.005	0	0.011	0.01	0.012	0.01	0.005	0.009	0	0	0.008	0.013	0.014	0.009	0.007	0.005
OTU493	-0.185	12.882	0.871285	0.986153	NotSig	Bacteria	Bacteroidetes	Bacteroidia	Bacteroidales	Unassigned	Unassigned	0.818	0.936	0.041	0.436	0.009	0.002	0.778	0.436	0.006	5.552	0.05	0.867	5.208	0.077	0.007	0	0.021	0.02	0.35	0.034	0	3.647
OTU874	-0.198	6.107	0.871841	0.986153	NotSig	Bacteria	Firmicutes	Clostridia	Clostridiales	Ruminococcaceae	Unassigned	0.002	0.002	0	0.012	0	0.005	0.002	0.003	0	0	0	0.002	0	0	0	0.009	0.003	0.01	0	0	0	0
OTU1113	-0.183	7.752	0.872275	0.986153	NotSig	Bacteria	Firmicutes	Clostridia	Clostridiales	Ruminococcaceae	Ruminococcus	0.017	0.019	0	0.012	0	0	0	0.043	0.026	0.043	0.01	0.032	0.061	0	0.034	0	0	0	0	0.011	0.005	0.075
OTU950	-0.133	6.121	0.872756	0.986153	NotSig	Bacteria	Firmicutes	Clostridia	Clostridiales	Ruminococcaceae	Unassigned	0.002	0.003	0.005	0	0.002	0	0	0.005	0.002	0	0.005	0.006	0.002	0	0	0	0.003	0	0.006	0.004	0.002	0.009
OTU1192	0.212	5.662	0.873814	0.98671	NotSig	Bacteria	Firmicutes	Clostridia	Clostridiales	Ruminococcaceae	Unassigned	0.001	0.001	0	0.007	0	0	0	0	0	0	0	0	0	0	0	0	0.003	0.003	0	0	0	0
OTU688	-0.205	5.558	0.876301	0.98888	NotSig	Bacteria	Bacteroidetes	Bacteroidia	Bacteroidales	Porphyromonadaceae	Unassigned	0	0	0	0	0	0	0.002	0	0	0	0	0	0	0	0	0	0.003	0	0	0	0	0
OTU1301	-0.191	6.381	0.877362	0.989438	NotSig	Bacteria	Firmicutes	Clostridia	Clostridiales	Unassigned	Unassigned	0.003	0.005	0.002	0	0	0	0.005	0	0.011	0	0	0.014	0.009	0	0	0	0	0.003	0.031	0	0	0.005
OTU1431	-0.142	6.646	0.878068	0.989596	NotSig	Bacteria	Firmicutes	Clostridia	Clostridiales	Lachnospiraceae	Unassigned	0.006	0.006	0.014	0	0	0	0.005	0.003	0	0.01	0.022	0.006	0.011	0.002	0	0	0	0	0.014	0.011	0.012	0.009
OTU622	0.112	10.834	0.879364	0.990417	NotSig	Bacteria	Unassigned	Unassigned	Unassigned	Unassigned	Unassigned	0.196	0.18	0.067	0.153	0.058	0	0.022	0.337	0.246	0.402	0.263	0.408	0.356	0.192	0.034	0.014	0.174	0.109	0.276	0.299	0.057	0.291
OTU733	-0.107	15.481	0.881808	0.99097	NotSig	Bacteria	Firmicutes	Clostridia	Clostridiales	Clostridiaceae_1	Clostridium_sensu_stricto	4.515	4.416	4.656	2.491	2.406	0.356	6.051	2.078	9.209	11.635	1.653	4.611	1.105	3.328	1.327	0.345	1.635	3.108	3.273	23.126	3.664	3.248
OTU197	-0.139	6.709	0.882501	0.99097	NotSig	Bacteria	Proteobacteria	Deltaproteobacteria	Desulfovibrionales	Desulfovibrionaceae	Desulfovibrio	0.006	0.006	0.002	0.005	0.011	0.009	0.023	0	0	0.004	0	0.002	0.009	0.002	0.022	0.005	0.013	0	0	0	0.002	0.002
OTU1505	0.127	5.909	0.883048	0.99097	NotSig	Bacteria	Firmicutes	Clostridia	Clostridiales	Lachnospiraceae	Unassigned	0.002	0.001	0	0	0	0	0.002	0.003	0.002	0.004	0.005	0.002	0	0.002	0	0	0.005	0	0	0.004	0	0.002
OTU1614	-0.19	5.559	0.88356	0.99097	NotSig	Bacteria	Proteobacteria	Alphaproteobacteria	Rhizobiales	Unassigned	Unassigned	0	0	0	0	0	0	0	0	0	0.002	0	0	0	0	0	0	0.003	0	0	0	0	0
OTU1359	-0.198	5.573	0.883652	0.99097	NotSig	Bacteria	Firmicutes	Clostridia	Clostridiales	Unassigned	Unassigned	0	0	0.002	0	0	0	0	0	0	0	0	0	0	0	0.002	0	0	0	0	0	0	0
OTU1358	-0.198	5.573	0.883705	0.99097	NotSig	Bacteria	Firmicutes	Unassigned	Unassigned	Unassigned	Unassigned	0	0	0	0.002	0	0	0	0	0	0	0	0	0	0	0.002	0	0	0	0	0	0	0
OTU71	-0.24	6.302	0.883823	0.99097	NotSig	Bacteria	Firmicutes	Bacilli	Lactobacillales	Enterococcaceae	Enterococcus	0.003	0.003	0	0.002	0.025	0	0	0	0	0	0	0.002	0	0	0	0	0	0	0	0.004	0.03	0
OTU554	-0.13	9.033	0.885653	0.992104	NotSig	Bacteria	Bacteroidetes	Bacteroidia	Bacteroidales	Porphyromonadaceae	Unassigned	0.051	0.055	0.036	0.017	0.018	0	0.251	0.084	0.023	0.061	0.022	0	0.023	0.386	0.002	0.002	0.008	0.01	0.057	0.019	0.012	0.031
OTU850	0.105	7.602	0.885969	0.992104	NotSig	Bacteria	Firmicutes	Clostridia	Clostridiales	Ruminococcaceae	Unassigned	0.017	0.015	0.019	0	0.007	0.002	0.016	0.023	0.006	0.071	0.012	0.016	0.034	0.009	0.005	0.005	0.016	0.013	0.014	0	0.025	0.031
OTU556	-0.181	5.644	0.886958	0.992576	NotSig	Bacteria	Bacteroidetes	Bacteroidia	Bacteroidales	Prevotellaceae	Prevotella	0.001	0	0	0	0	0	0	0.005	0	0	0	0	0	0	0.002	0	0	0.003	0	0	0	0
OTU162	0.119	5.818	0.888897	0.994108	NotSig	Bacteria	Unassigned	Unassigned	Unassigned	Unassigned	Unassigned	0.001	0.001	0	0.002	0	0	0.005	0	0.002	0	0	0.002	0	0	0.002	0.002	0	0	0.003	0.002	0	0
OTU1334	-0.164	5.632	0.893831	0.997939	NotSig	Bacteria	Firmicutes	Clostridia	Clostridiales	Ruminococcaceae	Unassigned	0	0.001	0	0.002	0	0	0	0	0	0	0.002	0	0	0	0	0	0.003	0.003	0	0	0	0
OTU435	0.114	8.014	0.894134	0.997939	NotSig	Bacteria	Bacteroidetes	Bacteroidia	Bacteroidales	Unassigned	Unassigned	0.025	0.02	0.017	0.136	0.031	0.002	0.034	0.015	0	0.014	0	0	0.054	0.038	0.032	0.007	0.013	0.003	0.006	0.011	0.017	0.023
OTU1277	-0.135	6.646	0.894444	0.997939	NotSig	Bacteria	Firmicutes	Clostridia	Clostridiales	Unassigned	Unassigned	0.006	0.006	0.002	0	0	0	0	0	0	0.004	0.055	0.002	0.002	0.007	0.015	0	0.003	0.005	0.011	0.002	0.002	0.009
OTU911	-0.157	5.876	0.895107	0.997939	NotSig	Bacteria	Firmicutes	Clostridia	Clostridiales	Ruminococcaceae	Unassigned	0.001	0.001	0	0	0.002	0	0.007	0	0	0.002	0	0.002	0	0	0	0	0	0	0	0.009	0.002	0.002
OTU1693	-0.112	6.96	0.895177	0.997939	NotSig	Bacteria	Firmicutes	Clostridia	Clostridiales	Unassigned	Unassigned	0.007	0.008	0.002	0.007	0.013	0.021	0.023	0.003	0	0	0	0.004	0.002	0.016	0.007	0.002	0.008	0.02	0.006	0.002	0.017	0
OTU375	0.099	9.427	0.896644	0.998938	NotSig	Bacteria	Bacteroidetes	Unassigned	Unassigned	Unassigned	Unassigned	0.062	0.066	0.017	0.039	0.018	0.009	0.048	0.091	0.261	0.035	0.017	0.08	0.213	0.081	0.005	0.002	0.034	0.036	0.023	0.122	0.04	0.101
OTU952	-0.118	5.673	0.898077	0.999897	NotSig	Bacteria	Firmicutes	Clostridia	Clostridiales	Ruminococcaceae	Unassigned	0.001	0.001	0	0.002	0	0	0	0	0	0.002	0.002	0	0.002	0.002	0	0	0	0	0	0	0	0.002
OTU325	-0.138	7.088	0.899565	1	NotSig	Bacteria	Firmicutes	Negativicutes	Selenomonadales	Veillonellaceae	Unassigned	0.01	0.011	0.01	0.063	0	0	0.005	0	0.002	0.004	0.012	0.004	0.005	0.005	0.002	0	0	0	0.094	0	0.002	0.002
OTU1540	-0.147	5.603	0.899723	1	NotSig	Bacteria	Firmicutes	Clostridia	Clostridiales	Lachnospiraceae	Butyrivibrio	0	0	0	0	0	0	0.004	0	0	0	0	0	0.005	0	0	0	0	0	0	0	0	0
OTU995	-0.144	5.621	0.902529	1	NotSig	Bacteria	Firmicutes	Clostridia	Clostridiales	Ruminococcaceae	Unassigned	0	0	0	0	0	0	0.002	0.003	0	0	0	0	0	0.002	0	0	0	0.003	0	0	0	0
OTU475	0.137	6.262	0.904429	1	NotSig	Bacteria	Bacteroidetes	Bacteroidia	Bacteroidales	Rikenellaceae	Alistipes	0.003	0.003	0.007	0.002	0.011	0	0	0	0.004	0	0	0.008	0.002	0	0.002	0	0	0	0.02	0	0.007	0
OTU1072	-0.141	5.552	0.904531	1	NotSig	Bacteria	Firmicutes	Unassigned	Unassigned	Unassigned	Unassigned	0	0	0	0	0	0	0.002	0	0	0	0	0	0	0	0	0	0	0	0	0	0	0.002
OTU231	0.113	5.726	0.905122	1	NotSig	Bacteria	Proteobacteria	Betaproteobacteria	Unassigned	Unassigned	Unassigned	0.001	0.001	0	0	0	0.002	0.002	0	0	0.002	0.002	0	0	0.002	0	0.002	0	0	0	0	0	0.002
OTU1547	0.131	5.828	0.905256	1	NotSig	Bacteria	Firmicutes	Clostridia	Clostridiales	Ruminococcaceae	Unassigned	0.001	0.001	0	0	0	0	0.002	0	0.002	0	0.01	0	0	0	0	0.005	0	0	0	0.002	0	0.002
OTU1129	-0.142	5.634	0.905383	1	NotSig	Bacteria	Firmicutes	Clostridia	Clostridiales	Ruminococcaceae	Oscillibacter	0	0.001	0	0	0	0	0	0.003	0	0	0	0.002	0	0	0	0	0.003	0.003	0	0	0	0
OTU1661	-0.076	10.908	0.905551	1	NotSig	Bacteria	Firmicutes	Clostridia	Clostridiales	Lachnospiraceae	Clostridium_XlVa	0.196	0.19	0.175	0.189	0.117	0.012	0.224	0.2	0.122	0.29	0.211	0.424	0.226	0.097	0.287	0.014	0.104	0.099	0.259	0.209	0.254	0.352
OTU1017	0.104	9.806	0.905831	1	NotSig	Bacteria	Firmicutes	Clostridia	Clostridiales	Ruminococcaceae	Unassigned	0.092	0.09	0.215	0.148	0.11	0.012	0.014	0	0.021	0.024	0.042	0.338	0.283	0.007	0.005	0.011	0.008	0.008	0.108	0.092	0.01	0.371
OTU1090	0.081	9.374	0.906377	1	NotSig	Bacteria	Firmicutes	Clostridia	Clostridiales	Ruminococcaceae	Unassigned	0.068	0.061	0.115	0.068	0.038	0.005	0.039	0.013	0.064	0.238	0.005	0.099	0.05	0.054	0.022	0.02	0.096	0.066	0.162	0.071	0.04	0.033
OTU873	-0.094	6.531	0.907217	1	NotSig	Bacteria	Firmicutes	Clostridia	Clostridiales	Ruminococcaceae	Unassigned	0.005	0.005	0.002	0.01	0.002	0.002	0	0.008	0.004	0.012	0.002	0.006	0.005	0.007	0.007	0.005	0	0	0.011	0	0.012	0
OTU145	-0.155	6.587	0.909366	1	NotSig	Bacteria	Unassigned	Unassigned	Unassigned	Unassigned	Unassigned	0.006	0.005	0.002	0.048	0.004	0	0	0	0	0	0	0	0.002	0	0	0.002	0	0	0	0.032	0.002	0.009
OTU1159	0.095	5.884	0.909778	1	NotSig	Bacteria	Unassigned	Unassigned	Unassigned	Unassigned	Unassigned	0.002	0.001	0.002	0.002	0.002	0	0	0	0	0.004	0	0.004	0	0.002	0	0.005	0.003	0	0	0	0.002	0
OTU108	0.127	8.599	0.910304	1	NotSig	Bacteria	Unassigned	Unassigned	Unassigned	Unassigned	Unassigned	0.036	0.032	0.005	0.019	0.018	0.002	0	0.015	0.011	0	0.02	0.268	0.036	0	0	0.005	0	0.01	0.006	0.141	0	0.124
OTU54	-0.133	8.964	0.91078	1	NotSig	Bacteria	Spirochaetes	Spirochaetia	Spirochaetales	Spirochaetaceae	Treponema	0.045	0.047	0.05	0.022	0.038	0.047	0	0.005	0	0.018	0.097	0.169	0.102	0	0.005	0	0	0	0	0.209	0	0.157
OTU692	-0.111	5.674	0.911333	1	NotSig	Bacteria	Bacteroidetes	Bacteroidia	Bacteroidales	Porphyromonadaceae	Unassigned	0.001	0.001	0	0.002	0	0	0	0	0	0.002	0	0.002	0.002	0	0	0	0	0	0	0	0	0.005
OTU1217	-0.126	5.553	0.911835	1	NotSig	Bacteria	Firmicutes	Clostridia	Clostridiales	Unassigned	Unassigned	0	0	0	0	0	0	0	0	0	0.002	0	0	0	0	0	0	0	0	0	0	0	0.002
OTU266	-0.127	5.632	0.913009	1	NotSig	Bacteria	Deferribacteres	Deferribacteres	Deferribacterales	Deferribacteraceae	Mucispirillum	0.001	0.001	0	0	0	0	0	0.003	0	0	0.002	0	0	0	0	0	0	0.005	0	0	0	0
OTU1454	0.093	6.996	0.914046	1	NotSig	Bacteria	Firmicutes	Clostridia	Clostridiales	Lachnospiraceae	Unassigned	0.009	0.008	0.014	0.007	0.016	0	0.002	0.048	0	0.002	0.005	0	0.005	0.023	0.005	0.002	0.01	0.008	0.014	0.002	0.012	0
OTU1532	-0.192	5.858	0.914077	1	NotSig	Bacteria	Firmicutes	Clostridia	Clostridiales	Ruminococcaceae	Unassigned	0.001	0.002	0	0	0	0	0	0	0	0.014	0	0	0.011	0	0	0	0	0	0	0	0	0.005
OTU498	-0.166	5.722	0.915662	1	NotSig	Bacteria	Bacteroidetes	Bacteroidia	Bacteroidales	Porphyromonadaceae	Porphyromonas	0.001	0.001	0	0	0	0	0	0	0.006	0	0	0	0	0	0.005	0	0	0	0	0	0	0.002
OTU1619	0.128	5.669	0.916316	1	NotSig	Bacteria	Firmicutes	Clostridia	Clostridiales	Lachnospiraceae	Unassigned	0.001	0.001	0	0	0	0	0	0	0	0	0	0.006	0	0	0.002	0	0	0	0.003	0	0	0
OTU939	-0.103	5.69	0.91863	1	NotSig	Bacteria	Firmicutes	Clostridia	Clostridiales	Unassigned	Unassigned	0.001	0.001	0	0.005	0	0	0	0.003	0	0	0	0	0.002	0	0	0	0	0.003	0.003	0	0	0
OTU1288	-0.139	6.633	0.919493	1	NotSig	Bacteria	Firmicutes	Clostridia	Clostridiales	Unassigned	Unassigned	0.006	0.005	0.002	0.056	0	0	0	0	0	0	0.002	0	0	0.009	0.005	0	0.003	0.003	0	0	0.035	0
OTU1604	0.135	6.052	0.919579	1	NotSig	Bacteria	Firmicutes	Clostridia	Clostridiales	Clostridiaceae_1	Clostridium_sensu_stricto	0.002	0.002	0	0	0	0	0	0	0.004	0.016	0	0.004	0	0	0	0	0	0	0.003	0.011	0.005	0
OTU875	0.106	6.015	0.920713	1	NotSig	Bacteria	Firmicutes	Clostridia	Clostridiales	Unassigned	Unassigned	0.002	0.002	0.002	0.002	0.007	0	0	0	0	0.004	0.005	0.002	0.009	0.005	0	0	0	0	0	0	0	0.007
OTU1188	-0.105	5.549	0.920835	1	NotSig	Bacteria	Firmicutes	Clostridia	Clostridiales	Unassigned	Unassigned	0	0	0	0	0	0	0.002	0	0	0	0	0	0.002	0	0	0	0	0	0	0	0	0
OTU1118	-0.094	6.483	0.921173	1	NotSig	Bacteria	Firmicutes	Clostridia	Clostridiales	Unassigned	Unassigned	0.005	0.004	0.014	0.002	0.002	0.005	0	0.008	0	0.016	0	0	0.009	0	0	0.007	0	0	0.003	0.006	0.005	0.014
OTU273	-0.108	5.563	0.921209	1	NotSig	Bacteria	Firmicutes	Bacilli	Lactobacillales	Aerococcaceae	Aerococcus	0	0	0	0	0	0	0	0	0	0	0	0.002	0	0	0	0	0	0.003	0	0	0	0
OTU1041	-0.107	5.563	0.922051	1	NotSig	Bacteria	Firmicutes	Clostridia	Clostridiales	Ruminococcaceae	Unassigned	0	0	0	0	0	0	0	0	0	0	0	0.002	0	0	0	0	0	0	0.003	0	0	0
OTU878	-0.12	6.064	0.922769	1	NotSig	Bacteria	Firmicutes	Clostridia	Clostridiales	Unassigned	Unassigned	0.002	0.002	0.002	0.002	0	0	0.005	0	0	0.002	0.007	0.004	0	0.025	0	0	0	0	0	0	0	0
OTU1021	-0.11	5.588	0.922779	1	NotSig	Bacteria	Firmicutes	Clostridia	Clostridiales	Unassigned	Unassigned	0	0	0	0	0	0.002	0	0	0	0	0	0	0	0	0	0.002	0	0	0	0	0	0
OTU1161	-0.103	6.139	0.927199	1	NotSig	Bacteria	Firmicutes	Clostridia	Clostridiales	Clostridiales_Incertae_Sedis_XIII	Mogibacterium	0.003	0.002	0.002	0	0	0.005	0	0.003	0	0	0.017	0	0	0.007	0	0.007	0.003	0.005	0	0	0.002	0
OTU298	-0.09	5.55	0.928158	1	NotSig	Bacteria	Proteobacteria	Betaproteobacteria	Burkholderiales	Unassigned	Unassigned	0	0	0	0	0	0	0	0	0	0.002	0	0	0.002	0	0	0	0	0	0	0	0	0
OTU1386	-0.074	9.085	0.928802	1	NotSig	Bacteria	Firmicutes	Clostridia	Clostridiales	Clostridiaceae_1	Clostridium_sensu_stricto	0.054	0.05	0.026	0.012	0.007	0.052	0.014	0.015	0.002	0.311	0.077	0.026	0.007	0.018	0.022	0	0.07	0.096	0.065	0.028	0.182	0.016
OTU271	-0.093	5.629	0.931155	1	NotSig	Bacteria	Proteobacteria	Betaproteobacteria	Neisseriales	Neisseriaceae	Neisseria	0	0	0.002	0	0	0	0	0.003	0	0	0	0	0	0.002	0	0	0.003	0	0	0	0	0
OTU1647	-0.094	7.417	0.932189	1	NotSig	Bacteria	Firmicutes	Clostridia	Clostridiales	Lachnospiraceae	Unassigned	0.015	0.012	0	0.005	0	0	0.011	0.013	0	0.004	0.112	0.002	0	0.029	0	0.016	0.023	0.023	0.009	0	0.025	0
OTU637	-0.07	8.274	0.932669	1	NotSig	Bacteria	Bacteroidetes	Unassigned	Unassigned	Unassigned	Unassigned	0.027	0.026	0.014	0.07	0.022	0.035	0.018	0.02	0	0.014	0.01	0.062	0.014	0.059	0.02	0	0.031	0.003	0	0.071	0.055	0.007
OTU843	-0.077	6.947	0.933488	1	NotSig	Bacteria	Firmicutes	Clostridia	Clostridiales	Unassigned	Unassigned	0.007	0.008	0	0.017	0	0	0.011	0	0.026	0	0.007	0.012	0.011	0.016	0.017	0.002	0.008	0.008	0.009	0	0	0.009
OTU1189	0.056	7.547	0.934898	1	NotSig	Bacteria	Firmicutes	Clostridia	Clostridiales	Ruminococcaceae	Unassigned	0.015	0.014	0.019	0.005	0.002	0.019	0.041	0.01	0.013	0.016	0.015	0.01	0.02	0.041	0.002	0.016	0.01	0.008	0.023	0	0.007	0.014
OTU1059	-0.077	5.565	0.935411	1	NotSig	Bacteria	Firmicutes	Clostridia	Clostridiales	Unassigned	Unassigned	0	0	0	0	0	0	0	0.003	0	0	0	0	0	0	0	0	0	0	0.003	0	0	0
OTU745	-0.057	9.419	0.936982	1	NotSig	Bacteria	Firmicutes	Clostridia	Clostridiales	Lachnospiraceae	Unassigned	0.07	0.064	0.012	0.022	0.004	0.014	0.075	0.041	0.073	0.195	0.253	0.008	0.034	0.07	0.044	0.009	0.049	0.056	0.08	0.073	0.167	0.061
OTU433	0.064	7.859	0.938394	1	NotSig	Bacteria	Bacteroidetes	Unassigned	Unassigned	Unassigned	Unassigned	0.018	0.018	0.007	0.012	0.007	0.044	0.014	0.003	0.039	0.022	0.005	0.022	0.014	0.009	0.025	0.02	0	0	0.097	0.004	0.007	0.005
OTU360	-0.08	5.682	0.940276	1	NotSig	Bacteria	Actinobacteria	Actinobacteria	Actinomycetales	Actinomycetaceae	Actinomyces	0.001	0.001	0.002	0	0	0	0	0	0.002	0.002	0	0	0	0	0	0	0	0	0	0	0	0.007
OTU118	-0.071	8.227	0.942317	1	NotSig	Bacteria	Spirochaetes	Spirochaetia	Spirochaetales	Spirochaetaceae	Treponema	0.023	0.024	0.036	0.007	0.045	0.016	0	0.003	0.068	0.008	0.002	0.042	0.011	0.005	0	0	0.005	0	0.014	0.152	0.03	0.023
OTU1489	-0.072	6.016	0.943197	1	NotSig	Bacteria	Firmicutes	Clostridia	Clostridiales	Ruminococcaceae	Unassigned	0.002	0.002	0	0	0	0.007	0.007	0.003	0	0	0	0.002	0.005	0	0	0	0	0.005	0	0	0.002	0.009
OTU898	0.09	6.01	0.943322	1	NotSig	Bacteria	Firmicutes	Clostridia	Clostridiales	Unassigned	Unassigned	0.002	0.002	0	0.005	0	0	0.005	0	0.006	0	0	0.004	0.005	0.014	0	0	0	0	0	0	0	0.002
OTU768	0.065	6.386	0.94431	1	NotSig	Bacteria	Actinobacteria	Actinobacteria	Actinomycetales	Corynebacteriaceae	Corynebacterium	0.004	0.004	0.005	0.002	0.013	0.002	0.009	0.003	0	0.002	0	0.004	0.005	0.002	0	0	0	0	0	0.019	0.002	0.007
OTU972	-0.054	5.568	0.945671	1	NotSig	Bacteria	Firmicutes	Clostridia	Clostridiales	Unassigned	Unassigned	0	0	0	0	0	0	0	0	0.002	0	0	0	0	0	0	0	0	0.003	0	0	0	0
OTU1040	-0.06	8.865	0.94664	1	NotSig	Bacteria	Firmicutes	Unassigned	Unassigned	Unassigned	Unassigned	0.041	0.043	0.012	0.005	0.009	0.005	0.065	0.008	0.139	0.018	0.144	0.006	0.023	0.016	0	0.023	0.228	0.104	0.006	0.002	0.015	0.014
OTU1047	-0.068	5.99	0.947447	1	NotSig	Bacteria	Firmicutes	Clostridia	Clostridiales	Ruminococcaceae	Unassigned	0.002	0.002	0.002	0	0.002	0	0.002	0	0	0.002	0.01	0.002	0	0	0	0	0	0	0	0.002	0.007	0.009
OTU503	-0.048	10.622	0.947815	1	NotSig	Bacteria	Bacteroidetes	Unassigned	Unassigned	Unassigned	Unassigned	0.142	0.171	0.036	0.073	0.031	0.541	0.066	0.304	0.096	0.193	0.067	0.01	0.691	0.075	0.027	0.043	0.114	0.135	0.131	0.068	0.04	0.383
OTU1527	0.055	6.456	0.948869	1	NotSig	Bacteria	Firmicutes	Clostridia	Clostridiales	Lachnospiraceae	Unassigned	0.005	0.004	0.002	0.017	0	0.002	0	0	0.004	0.006	0.017	0	0.002	0.005	0	0.002	0.01	0.01	0.009	0.002	0.002	0
OTU1138	0.041	5.771	0.952477	1	NotSig	Bacteria	Firmicutes	Clostridia	Clostridiales	Unassigned	Unassigned	0.001	0.001	0.002	0	0.002	0	0.005	0	0	0	0	0	0	0	0.002	0.005	0	0	0	0	0	0
OTU1165	-0.04	10.015	0.952555	1	NotSig	Bacteria	Firmicutes	Clostridia	Clostridiales	Lachnospiraceae	Coprococcus	0.109	0.107	0.031	0.109	0.038	0.044	0.219	0.061	0.038	0.276	0.245	0.032	0.177	0.086	0.039	0.002	0.057	0.053	0.259	0.056	0.172	0.167
OTU96	0.099	6.054	0.953237	1	NotSig	Bacteria	Unassigned	Unassigned	Unassigned	Unassigned	Unassigned	0.003	0.002	0	0	0	0	0	0.025	0	0	0	0	0	0	0	0.009	0	0	0	0	0.002	0.005
OTU858	0.049	6.53	0.954531	1	NotSig	Bacteria	Unassigned	Unassigned	Unassigned	Unassigned	Unassigned	0.005	0.005	0.005	0.017	0.002	0	0.009	0.008	0.004	0.002	0.002	0.004	0.005	0	0	0	0.008	0.003	0.026	0	0	0.012
OTU1485	-0.047	6.786	0.9581	1	NotSig	Bacteria	Firmicutes	Clostridia	Clostridiales	Lachnospiraceae	Unassigned	0.007	0.007	0.036	0.002	0.009	0	0.002	0.005	0.002	0.008	0.005	0.002	0.002	0.002	0.007	0	0	0.003	0.026	0	0.025	0.002
OTU310	-0.022	5.56	0.960066	1	NotSig	Bacteria	Proteobacteria	Gammaproteobacteria	Pseudomonadales	Moraxellaceae	Moraxella	0	0	0	0	0	0	0	0.003	0	0	0	0	0	0.002	0	0	0	0	0	0	0	0
OTU70	-0.068	5.799	0.960545	1	NotSig	Bacteria	Firmicutes	Unassigned	Unassigned	Unassigned	Unassigned	0.001	0.001	0.005	0.002	0	0	0	0	0	0.002	0	0.002	0	0	0.005	0	0	0	0	0.002	0.002	0
OTU1504	0.044	6.069	0.96217	1	NotSig	Bacteria	Firmicutes	Clostridia	Clostridiales	Ruminococcaceae	Clostridium_IV	0.003	0.002	0	0.002	0	0	0.004	0	0	0.008	0.007	0.004	0.002	0	0	0	0.005	0	0.006	0.009	0	0
OTU479	0.045	5.887	0.965042	1	NotSig	Bacteria	Bacteroidetes	Bacteroidia	Bacteroidales	Bacteroidaceae	Bacteroides	0.002	0.001	0	0.002	0	0	0	0.008	0	0.002	0.002	0.002	0.002	0.005	0	0.002	0	0	0	0	0	0.005
OTU1664	0.038	6.363	0.965466	1	NotSig	Bacteria	Unassigned	Unassigned	Unassigned	Unassigned	Unassigned	0.004	0.004	0	0.002	0	0	0.023	0	0	0.01	0.002	0.004	0.009	0.005	0.002	0.002	0.003	0	0.011	0	0	0.007
OTU19	0.03	10.239	0.968932	1	NotSig	Bacteria	Firmicutes	Erysipelotrichia	Erysipelotrichales	Erysipelotrichaceae	Unassigned	0.129	0.124	0.072	0.23	0.016	0.047	0.02	0.543	0.083	0.242	0.007	0.028	0.109	0.312	0.007	0.009	0.117	0.084	0.313	0.145	0.015	0.127
OTU869	0.025	9.236	0.968956	1	NotSig	Bacteria	Firmicutes	Clostridia	Clostridiales	Ruminococcaceae	Unassigned	0.059	0.052	0.062	0.077	0.027	0.066	0.1	0.018	0.032	0.12	0.037	0.052	0.07	0.014	0.02	0.077	0.018	0.013	0.102	0.051	0.097	0.061
OTU1283	0.035	6.585	0.970966	1	NotSig	Bacteria	Firmicutes	Clostridia	Clostridiales	Ruminococcaceae	Unassigned	0.006	0.005	0.012	0.007	0	0	0	0.033	0	0	0.002	0.004	0.002	0.02	0	0.007	0.005	0.003	0.009	0.002	0	0.002
OTU672	-0.039	5.681	0.971214	1	NotSig	Bacteria	Bacteroidetes	Bacteroidia	Bacteroidales	Porphyromonadaceae	Unassigned	0.001	0.001	0	0.007	0	0	0	0	0	0	0	0	0.005	0	0	0	0	0	0.003	0	0	0
OTU1366	0.002	5.558	0.971406	1	NotSig	Bacteria	Firmicutes	Clostridia	Clostridiales	Ruminococcaceae	Unassigned	0	0	0	0	0	0	0	0.003	0	0	0	0	0.002	0	0	0	0	0	0	0	0	0
OTU1629	-0.046	6.311	0.971809	1	NotSig	Bacteria	Firmicutes	Clostridia	Clostridiales	Lachnospiraceae	Unassigned	0.003	0.004	0	0	0	0	0	0.01	0.002	0	0	0.022	0.005	0	0	0	0	0	0.023	0.006	0	0.005
OTU1183	0.028	7.669	0.972777	1	NotSig	Bacteria	Firmicutes	Clostridia	Clostridiales	Lachnospiraceae	Unassigned	0.018	0.017	0.014	0.002	0.007	0.002	0.013	0.003	0.017	0.104	0.01	0.004	0.036	0.02	0	0	0.013	0.008	0.028	0.002	0.02	0.045
OTU647	-0.066	5.888	0.97292	1	NotSig	Bacteria	Bacteroidetes	Bacteroidia	Bacteroidales	Prevotellaceae	Prevotella	0.001	0.002	0	0	0	0	0.011	0	0	0	0	0.004	0	0	0	0	0	0	0.017	0	0	0
OTU1363	-0.039	5.708	0.973504	1	NotSig	Bacteria	Firmicutes	Clostridia	Clostridiales	Clostridiales_Incertae_Sedis_XIII	Unassigned	0.001	0.001	0	0	0	0	0	0	0.006	0	0	0	0	0	0	0	0	0	0.006	0.002	0	0
OTU1393	0.029	7.9	0.973905	1	NotSig	Bacteria	Firmicutes	Clostridia	Clostridiales	Unassigned	Unassigned	0.022	0.02	0.029	0	0.034	0	0.018	0.003	0.004	0.012	0.114	0.008	0.038	0.032	0.002	0	0.01	0.028	0.011	0	0.042	0.04
OTU1166	0.041	5.853	0.974036	1	NotSig	Bacteria	Firmicutes	Clostridia	Clostridiales	Ruminococcaceae	Unassigned	0.001	0.001	0	0	0.004	0	0	0	0.004	0.004	0	0	0	0	0	0	0.005	0.005	0	0.002	0	0
OTU1471	0.024	6.888	0.976376	1	NotSig	Bacteria	Firmicutes	Clostridia	Clostridiales	Ruminococcaceae	Unassigned	0.008	0.008	0.012	0.005	0.007	0.002	0.002	0.005	0.011	0.008	0.025	0.002	0.02	0.005	0.002	0.007	0	0	0.009	0	0.002	0.031
OTU961	0.026	5.838	0.98102	1	NotSig	Bacteria	Firmicutes	Clostridia	Clostridiales	Unassigned	Unassigned	0.001	0.001	0	0.005	0.004	0	0.002	0	0	0.002	0	0	0	0	0.002	0	0	0.003	0	0	0	0.007
OTU97	0.023	8.361	0.982414	1	NotSig	Bacteria	Firmicutes	Unassigned	Unassigned	Unassigned	Unassigned	0.028	0.028	0.007	0.041	0	0.014	0.002	0.025	0.081	0.049	0.002	0.054	0.075	0.002	0	0	0.003	0	0.011	0.122	0	0.07
OTU1748	0.028	5.561	0.982523	1	NotSig	Bacteria	Firmicutes	Clostridia	Clostridiales	Ruminococcaceae	Unassigned	0	0	0	0	0	0	0	0	0.002	0	0	0	0.002	0	0	0	0	0	0	0	0	0
OTU805	-0.02	11.3	0.982682	1	NotSig	Bacteria	Firmicutes	Clostridia	Clostridiales	Unassigned	Unassigned	0.233	0.244	0.218	0.153	0.27	0.878	0.344	0.043	0.021	0.061	0.312	0.034	0.673	0	0.071	0.272	0.008	0.008	0	0.167	0.533	0.707
OTU708	-0.012	11.706	0.985658	1	NotSig	Bacteria	Firmicutes	Clostridia	Clostridiales	Ruminococcaceae	Unassigned	0.361	0.336	0.215	0.317	0.083	0.002	0.593	0.332	0.222	0.438	0.791	0.618	0.269	0.644	0.236	0.234	0.124	0.069	1.061	0.169	0.286	0.265
OTU1252	-0.012	8.835	0.988899	1	NotSig	Bacteria	Actinobacteria	Actinobacteria	Coriobacteriales	Coriobacteriaceae	Slackia	0.047	0.039	0.007	0.002	0.002	0.005	0.273	0.01	0.004	0.039	0.131	0	0.009	0.059	0.015	0.066	0.047	0.084	0.06	0.004	0.03	0.019
OTU1057	0.028	5.634	0.993019	1	NotSig	Bacteria	Firmicutes	Unassigned	Unassigned	Unassigned	Unassigned	0	0	0.002	0	0	0.002	0	0	0	0	0	0	0	0	0	0	0	0	0	0	0	0.005
OTU1001	0.008	5.851	0.994239	1	NotSig	Bacteria	Firmicutes	Clostridia	Clostridiales	Unassigned	Unassigned	0.001	0.001	0	0.002	0.002	0.007	0	0	0	0	0	0	0	0	0.002	0	0	0.003	0.003	0	0	0.005
OTU436	0.005	8.296	0.994484	1	NotSig	Bacteria	Bacteroidetes	Unassigned	Unassigned	Unassigned	Unassigned	0.027	0.026	0.031	0.053	0.07	0.021	0.013	0.013	0.023	0.018	0.017	0.014	0.066	0.011	0.032	0.016	0.047	0.023	0.006	0.017	0.017	0.028
OTU854	0.005	7.724	0.994524	1	NotSig	Bacteria	Firmicutes	Clostridia	Clostridiales	Ruminococcaceae	Unassigned	0.017	0.017	0.007	0.044	0.013	0.014	0.002	0.008	0.024	0.028	0.027	0.006	0.029	0.027	0.002	0.005	0.008	0.025	0.009	0.019	0.01	0.038
OTU456	-0.008	6.437	0.994751	1	NotSig	Bacteria	Bacteroidetes	Unassigned	Unassigned	Unassigned	Unassigned	0.004	0.005	0	0	0.002	0	0	0	0.011	0	0.027	0.002	0.032	0	0	0	0	0	0	0	0	0.016
OTU1389	-0.005	8.647	0.995042	1	NotSig	Bacteria	Firmicutes	Clostridia	Clostridiales	Lachnospiraceae	Unassigned	0.038	0.037	0.026	0	0.029	0.023	0.022	0.02	0.034	0.215	0.002	0.008	0.043	0.027	0.005	0	0.052	0.058	0.04	0.053	0.012	0.082
OTU1412	-0.006	6.834	0.995233	1	NotSig	Bacteria	Firmicutes	Clostridia	Clostridiales	Ruminococcaceae	Clostridium_IV	0.007	0.006	0.005	0.002	0.004	0.014	0	0	0.009	0.002	0.015	0.014	0.002	0.002	0	0.007	0	0.005	0	0.043	0	0
OTU1319	0.007	5.827	0.995269	1	NotSig	Bacteria	Firmicutes	Clostridia	Clostridiales	Lachnospiraceae	Unassigned	0.001	0.001	0	0	0	0.002	0.002	0.003	0	0.006	0	0	0.002	0	0	0	0	0.003	0.009	0	0	0
OTU1517	-0.005	8.115	0.99579	1	NotSig	Bacteria	Firmicutes	Clostridia	Clostridiales	Lachnospiraceae	Unassigned	0.023	0.023	0.002	0.002	0.007	0.005	0.005	0.028	0.032	0.004	0.012	0.129	0.027	0	0.057	0	0	0.003	0.065	0.021	0	0.059
OTU527	-0.007	5.922	0.996881	1	NotSig	Bacteria	Bacteroidetes	Bacteroidia	Bacteroidales	Prevotellaceae	Prevotella	0.002	0.001	0.005	0.005	0.007	0	0	0	0	0	0	0	0	0.007	0.007	0	0	0	0	0	0	0
OTU222	0.068	5.57	0.998637	1	NotSig	Bacteria	Proteobacteria	Betaproteobacteria	Burkholderiales	Unassigned	Unassigned	0	0	0	0	0	0.002	0	0	0	0	0	0	0	0.002	0	0	0	0	0	0	0	0
OTU1037	0	5.493	1	1	NotSig	Bacteria	Firmicutes	Unassigned	Unassigned	Unassigned	Unassigned	0	0	0	0	0	0	0	0	0	0	0	0	0	0	0	0	0	0	0	0	0	0
OTU1039	0	5.493	1	1	NotSig	Bacteria	Firmicutes	Clostridia	Clostridiales	Ruminococcaceae	Unassigned	0	0	0	0	0	0	0	0	0	0	0	0	0	0	0	0	0	0	0	0	0	0
OTU1053	0	5.493	1	1	NotSig	Bacteria	Fusobacteria	Fusobacteriia	Fusobacteriales	Fusobacteriaceae	Fusobacterium	0	0	0	0	0	0	0	0	0	0	0	0	0	0	0	0	0	0	0	0	0	0
OTU1064	0	5.493	1	1	NotSig	Bacteria	Firmicutes	Clostridia	Clostridiales	Lachnospiraceae	Unassigned	0	0	0	0	0	0	0	0	0	0	0	0	0	0	0	0	0	0	0	0	0	0
OTU1066	0	5.493	1	1	NotSig	Bacteria	Unassigned	Unassigned	Unassigned	Unassigned	Unassigned	0	0	0	0	0	0	0	0	0	0	0	0	0	0	0	0	0	0	0	0	0	0
OTU1076	0	5.493	1	1	NotSig	Bacteria	Firmicutes	Clostridia	Clostridiales	Unassigned	Unassigned	0	0	0	0	0	0	0	0	0	0	0	0	0	0	0	0	0	0	0	0	0	0
OTU1171	0	5.493	1	1	NotSig	Bacteria	Firmicutes	Clostridia	Clostridiales	Ruminococcaceae	Unassigned	0	0	0	0	0	0	0	0	0	0	0	0	0	0	0	0	0	0	0	0	0	0
OTU1209	0	5.493	1	1	NotSig	Bacteria	Firmicutes	Unassigned	Unassigned	Unassigned	Unassigned	0	0	0	0	0	0	0	0	0	0	0	0	0	0	0	0	0	0	0	0	0	0
OTU1214	0	5.493	1	1	NotSig	Bacteria	Firmicutes	Clostridia	Clostridiales	Unassigned	Unassigned	0	0	0	0	0	0	0	0	0	0	0	0	0	0	0	0	0	0	0	0	0	0
OTU1215	0	5.493	1	1	NotSig	Bacteria	Firmicutes	Clostridia	Clostridiales	Ruminococcaceae	Unassigned	0	0	0	0	0	0	0	0	0	0	0	0	0	0	0	0	0	0	0	0	0	0
OTU1231	0	5.493	1	1	NotSig	Bacteria	Firmicutes	Clostridia	Clostridiales	Unassigned	Unassigned	0	0	0	0	0	0	0	0	0	0	0	0	0	0	0	0	0	0	0	0	0	0
OTU1326	0	5.493	1	1	NotSig	Bacteria	Unassigned	Unassigned	Unassigned	Unassigned	Unassigned	0	0	0	0	0	0	0	0	0	0	0	0	0	0	0	0	0	0	0	0	0	0
OTU1329	0	5.493	1	1	NotSig	Bacteria	Unassigned	Unassigned	Unassigned	Unassigned	Unassigned	0	0	0	0	0	0	0	0	0	0	0	0	0	0	0	0	0	0	0	0	0	0
OTU1337	0	5.493	1	1	NotSig	Bacteria	Firmicutes	Clostridia	Clostridiales	Unassigned	Unassigned	0	0	0	0	0	0	0	0	0	0	0	0	0	0	0	0	0	0	0	0	0	0
OTU1338	0	5.493	1	1	NotSig	Bacteria	Unassigned	Unassigned	Unassigned	Unassigned	Unassigned	0	0	0	0	0	0	0	0	0	0	0	0	0	0	0	0	0	0	0	0	0	0
OTU1345	0	5.493	1	1	NotSig	Bacteria	Firmicutes	Clostridia	Clostridiales	Unassigned	Unassigned	0	0	0	0	0	0	0	0	0	0	0	0	0	0	0	0	0	0	0	0	0	0
OTU1346	0	5.493	1	1	NotSig	Bacteria	Proteobacteria	Epsilonproteobacteria	Campylobacterales	Campylobacteraceae	Campylobacter	0	0	0	0	0	0	0	0	0	0	0	0	0	0	0	0	0	0	0	0	0	0
OTU1465	0	5.493	1	1	NotSig	Bacteria	Firmicutes	Clostridia	Clostridiales	Ruminococcaceae	Unassigned	0	0	0	0	0	0	0	0	0	0	0	0	0	0	0	0	0	0	0	0	0	0
OTU1537	0	5.493	1	1	NotSig	Bacteria	Proteobacteria	Alphaproteobacteria	Unassigned	Unassigned	Unassigned	0	0	0	0	0	0	0	0	0	0	0	0	0	0	0	0	0	0	0	0	0	0
OTU1554	0	5.493	1	1	NotSig	Bacteria	Firmicutes	Clostridia	Clostridiales	Ruminococcaceae	Clostridium_IV	0	0	0	0	0	0	0	0	0	0	0	0	0	0	0	0	0	0	0	0	0	0
OTU1570	0	5.493	1	1	NotSig	Bacteria	Proteobacteria	Alphaproteobacteria	Unassigned	Unassigned	Unassigned	0	0	0	0	0	0	0	0	0	0	0	0	0	0	0	0	0	0	0	0	0	0
OTU1580	0	5.493	1	1	NotSig	Bacteria	Proteobacteria	Alphaproteobacteria	Unassigned	Unassigned	Unassigned	0	0	0	0	0	0	0	0	0	0	0	0	0	0	0	0	0	0	0	0	0	0
OTU1587	0	5.493	1	1	NotSig	Bacteria	Firmicutes	Clostridia	Clostridiales	Lachnospiraceae	Unassigned	0	0	0	0	0	0	0	0	0	0	0	0	0	0	0	0	0	0	0	0	0	0
OTU1593	0	5.493	1	1	NotSig	Bacteria	Proteobacteria	Alphaproteobacteria	Unassigned	Unassigned	Unassigned	0	0	0	0	0	0	0	0	0	0	0	0	0	0	0	0	0	0	0	0	0	0
OTU1596	0	5.493	1	1	NotSig	Bacteria	Proteobacteria	Unassigned	Unassigned	Unassigned	Unassigned	0	0	0	0	0	0	0	0	0	0	0	0	0	0	0	0	0	0	0	0	0	0
OTU1615	0	5.493	1	1	NotSig	Bacteria	Firmicutes	Clostridia	Clostridiales	Lachnospiraceae	Unassigned	0	0	0	0	0	0	0	0	0	0	0	0	0	0	0	0	0	0	0	0	0	0
OTU1624	0	5.493	1	1	NotSig	Bacteria	Firmicutes	Clostridia	Clostridiales	Lachnospiraceae	Unassigned	0	0	0	0	0	0	0	0	0	0	0	0	0	0	0	0	0	0	0	0	0	0
OTU1625	0	5.493	1	1	NotSig	Bacteria	Firmicutes	Unassigned	Unassigned	Unassigned	Unassigned	0	0	0	0	0	0	0	0	0	0	0	0	0	0	0	0	0	0	0	0	0	0
OTU1626	0	5.493	1	1	NotSig	Bacteria	Firmicutes	Clostridia	Clostridiales	Lachnospiraceae	Unassigned	0	0	0	0	0	0	0	0	0	0	0	0	0	0	0	0	0	0	0	0	0	0
OTU1637	0	5.493	1	1	NotSig	Bacteria	Firmicutes	Clostridia	Clostridiales	Lachnospiraceae	Unassigned	0	0	0	0	0	0	0	0	0	0	0	0	0	0	0	0	0	0	0	0	0	0
OTU1662	0	5.493	1	1	NotSig	Bacteria	Unassigned	Unassigned	Unassigned	Unassigned	Unassigned	0	0	0	0	0	0	0	0	0	0	0	0	0	0	0	0	0	0	0	0	0	0
OTU1666	0	5.493	1	1	NotSig	Bacteria	Firmicutes	Clostridia	Clostridiales	Lachnospiraceae	Clostridium_XlVa	0	0	0	0	0	0	0	0	0	0	0	0	0	0	0	0	0	0	0	0	0	0
OTU1733	0	5.493	1	1	NotSig	Bacteria	Firmicutes	Clostridia	Clostridiales	Peptoniphilaceae	Peptoniphilus	0	0	0	0	0	0	0	0	0	0	0	0	0	0	0	0	0	0	0	0	0	0
OTU1735	0	5.493	1	1	NotSig	Bacteria	Firmicutes	Clostridia	Clostridiales	Clostridiales_Incertae_Sedis_XI	Finegoldia	0	0	0	0	0	0	0	0	0	0	0	0	0	0	0	0	0	0	0	0	0	0
OTU175	0	5.493	1	1	NotSig	Bacteria	Firmicutes	Bacilli	Lactobacillales	Lactobacillaceae	Lactobacillus	0	0	0	0	0	0	0	0	0	0	0	0	0	0	0	0	0	0	0	0	0	0
OTU176	0	5.493	1	1	NotSig	Bacteria	Unassigned	Unassigned	Unassigned	Unassigned	Unassigned	0	0	0	0	0	0	0	0	0	0	0	0	0	0	0	0	0	0	0	0	0	0
OTU188	0	5.493	1	1	NotSig	Bacteria	Unassigned	Unassigned	Unassigned	Unassigned	Unassigned	0	0	0	0	0	0	0	0	0	0	0	0	0	0	0	0	0	0	0	0	0	0
OTU215	0	5.493	1	1	NotSig	Bacteria	Unassigned	Unassigned	Unassigned	Unassigned	Unassigned	0	0	0	0	0	0	0	0	0	0	0	0	0	0	0	0	0	0	0	0	0	0
OTU216	0	5.493	1	1	NotSig	Bacteria	Unassigned	Unassigned	Unassigned	Unassigned	Unassigned	0	0	0	0	0	0	0	0	0	0	0	0	0	0	0	0	0	0	0	0	0	0
OTU221	0	5.493	1	1	NotSig	Bacteria	Unassigned	Unassigned	Unassigned	Unassigned	Unassigned	0	0	0	0	0	0	0	0	0	0	0	0	0	0	0	0	0	0	0	0	0	0
OTU235	0	5.493	1	1	NotSig	Bacteria	Unassigned	Unassigned	Unassigned	Unassigned	Unassigned	0	0	0	0	0	0	0	0	0	0	0	0	0	0	0	0	0	0	0	0	0	0
OTU241	0	5.493	1	1	NotSig	Bacteria	Firmicutes	Unassigned	Unassigned	Unassigned	Unassigned	0	0	0	0	0	0	0	0	0	0	0	0	0	0	0	0	0	0	0	0	0	0
OTU244	0	5.493	1	1	NotSig	Bacteria	Unassigned	Unassigned	Unassigned	Unassigned	Unassigned	0	0	0	0	0	0	0	0	0	0	0	0	0	0	0	0	0	0	0	0	0	0
OTU246	0	5.493	1	1	NotSig	Bacteria	Unassigned	Unassigned	Unassigned	Unassigned	Unassigned	0	0	0	0	0	0	0	0	0	0	0	0	0	0	0	0	0	0	0	0	0	0
OTU251	0	5.493	1	1	NotSig	Bacteria	Unassigned	Unassigned	Unassigned	Unassigned	Unassigned	0	0	0	0	0	0	0	0	0	0	0	0	0	0	0	0	0	0	0	0	0	0
OTU252	0	5.493	1	1	NotSig	Bacteria	Firmicutes	Unassigned	Unassigned	Unassigned	Unassigned	0	0	0	0	0	0	0	0	0	0	0	0	0	0	0	0	0	0	0	0	0	0
OTU265	0	5.493	1	1	NotSig	Bacteria	Proteobacteria	Betaproteobacteria	Burkholderiales	Unassigned	Unassigned	0	0	0	0	0	0	0	0	0	0	0	0	0	0	0	0	0	0	0	0	0	0
OTU283	0	5.493	1	1	NotSig	Bacteria	Unassigned	Unassigned	Unassigned	Unassigned	Unassigned	0	0	0	0	0	0	0	0	0	0	0	0	0	0	0	0	0	0	0	0	0	0
OTU286	0	5.493	1	1	NotSig	Bacteria	Firmicutes	Unassigned	Unassigned	Unassigned	Unassigned	0	0	0	0	0	0	0	0	0	0	0	0	0	0	0	0	0	0	0	0	0	0
OTU288	0	5.493	1	1	NotSig	Bacteria	Unassigned	Unassigned	Unassigned	Unassigned	Unassigned	0	0	0	0	0	0	0	0	0	0	0	0	0	0	0	0	0	0	0	0	0	0
OTU289	0	5.493	1	1	NotSig	Bacteria	Unassigned	Unassigned	Unassigned	Unassigned	Unassigned	0	0	0	0	0	0	0	0	0	0	0	0	0	0	0	0	0	0	0	0	0	0
OTU296	0	5.493	1	1	NotSig	Bacteria	Unassigned	Unassigned	Unassigned	Unassigned	Unassigned	0	0	0	0	0	0	0	0	0	0	0	0	0	0	0	0	0	0	0	0	0	0
OTU311	0	5.493	1	1	NotSig	Bacteria	Firmicutes	Bacilli	Lactobacillales	Lactobacillaceae	Lactobacillus	0	0	0	0	0	0	0	0	0	0	0	0	0	0	0	0	0	0	0	0	0	0
OTU324	0	5.493	1	1	NotSig	Bacteria	Firmicutes	Unassigned	Unassigned	Unassigned	Unassigned	0	0	0	0	0	0	0	0	0	0	0	0	0	0	0	0	0	0	0	0	0	0
OTU326	0	5.493	1	1	NotSig	Bacteria	Firmicutes	Negativicutes	Selenomonadales	Veillonellaceae	Schwartzia	0	0	0	0	0	0	0	0	0	0	0	0	0	0	0	0	0	0	0	0	0	0
OTU357	0	5.493	1	1	NotSig	Bacteria	Tenericutes	Mollicutes	Unassigned	Unassigned	Unassigned	0	0	0	0	0	0	0	0	0	0	0	0	0	0	0	0	0	0	0	0	0	0
OTU495	0	5.493	1	1	NotSig	Bacteria	Bacteroidetes	Unassigned	Unassigned	Unassigned	Unassigned	0	0	0	0	0	0	0	0	0	0	0	0	0	0	0	0	0	0	0	0	0	0
OTU507	0	5.493	1	1	NotSig	Bacteria	Bacteroidetes	Bacteroidia	Bacteroidales	Porphyromonadaceae	Unassigned	0	0	0	0	0	0	0	0	0	0	0	0	0	0	0	0	0	0	0	0	0	0
OTU520	0	5.493	1	1	NotSig	Bacteria	Bacteroidetes	Bacteroidia	Bacteroidales	Porphyromonadaceae	Unassigned	0	0	0	0	0	0	0	0	0	0	0	0	0	0	0	0	0	0	0	0	0	0
OTU538	0	5.493	1	1	NotSig	Bacteria	Bacteroidetes	Bacteroidia	Bacteroidales	Prevotellaceae	Prevotella	0	0	0	0	0	0	0	0	0	0	0	0	0	0	0	0	0	0	0	0	0	0
OTU546	0	5.493	1	1	NotSig	Bacteria	Bacteroidetes	Bacteroidia	Bacteroidales	Prevotellaceae	Prevotella	0	0	0	0	0	0	0	0	0	0	0	0	0	0	0	0	0	0	0	0	0	0
OTU555	0	5.493	1	1	NotSig	Bacteria	Bacteroidetes	Bacteroidia	Bacteroidales	Prevotellaceae	Prevotella	0	0	0	0	0	0	0	0	0	0	0	0	0	0	0	0	0	0	0	0	0	0
OTU559	0	5.493	1	1	NotSig	Bacteria	Bacteroidetes	Bacteroidia	Bacteroidales	Prevotellaceae	Prevotella	0	0	0	0	0	0	0	0	0	0	0	0	0	0	0	0	0	0	0	0	0	0
OTU560	0	5.493	1	1	NotSig	Bacteria	Bacteroidetes	Unassigned	Unassigned	Unassigned	Unassigned	0	0	0	0	0	0	0	0	0	0	0	0	0	0	0	0	0	0	0	0	0	0
OTU564	0	5.493	1	1	NotSig	Bacteria	Bacteroidetes	Bacteroidia	Bacteroidales	Prevotellaceae	Prevotella	0	0	0	0	0	0	0	0	0	0	0	0	0	0	0	0	0	0	0	0	0	0
OTU571	0	5.493	1	1	NotSig	Bacteria	Bacteroidetes	Bacteroidia	Bacteroidales	Prevotellaceae	Prevotella	0	0	0	0	0	0	0	0	0	0	0	0	0	0	0	0	0	0	0	0	0	0
OTU608	0	5.493	1	1	NotSig	Bacteria	Bacteroidetes	Bacteroidia	Bacteroidales	Bacteroidaceae	Bacteroides	0	0	0	0	0	0	0	0	0	0	0	0	0	0	0	0	0	0	0	0	0	0
OTU609	0	5.493	1	1	NotSig	Bacteria	Bacteroidetes	Bacteroidia	Bacteroidales	Prevotellaceae	Prevotella	0	0	0	0	0	0	0	0	0	0	0	0	0	0	0	0	0	0	0	0	0	0
OTU610	0	5.493	1	1	NotSig	Bacteria	Bacteroidetes	Bacteroidia	Bacteroidales	Porphyromonadaceae	Proteiniphilum	0	0	0	0	0	0	0	0	0	0	0	0	0	0	0	0	0	0	0	0	0	0
OTU611	0	5.493	1	1	NotSig	Bacteria	Bacteroidetes	Flavobacteriia	Flavobacteriales	Flavobacteriaceae	Unassigned	0	0	0	0	0	0	0	0	0	0	0	0	0	0	0	0	0	0	0	0	0	0
OTU614	0	5.493	1	1	NotSig	Bacteria	Bacteroidetes	Bacteroidia	Bacteroidales	Porphyromonadaceae	Porphyromonas	0	0	0	0	0	0	0	0	0	0	0	0	0	0	0	0	0	0	0	0	0	0
OTU652	0	5.493	1	1	NotSig	Bacteria	Bacteroidetes	Unassigned	Unassigned	Unassigned	Unassigned	0	0	0	0	0	0	0	0	0	0	0	0	0	0	0	0	0	0	0	0	0	0
OTU662	0	5.493	1	1	NotSig	Bacteria	Bacteroidetes	Bacteroidia	Bacteroidales	Porphyromonadaceae	Butyricimonas	0	0	0	0	0	0	0	0	0	0	0	0	0	0	0	0	0	0	0	0	0	0
OTU691	0	5.493	1	1	NotSig	Bacteria	Bacteroidetes	Bacteroidia	Bacteroidales	Porphyromonadaceae	Unassigned	0	0	0	0	0	0	0	0	0	0	0	0	0	0	0	0	0	0	0	0	0	0
OTU694	0	5.493	1	1	NotSig	Bacteria	Bacteroidetes	Bacteroidia	Bacteroidales	Porphyromonadaceae	Unassigned	0	0	0	0	0	0	0	0	0	0	0	0	0	0	0	0	0	0	0	0	0	0
OTU695	0	5.493	1	1	NotSig	Bacteria	Bacteroidetes	Unassigned	Unassigned	Unassigned	Unassigned	0	0	0	0	0	0	0	0	0	0	0	0	0	0	0	0	0	0	0	0	0	0
OTU701	0	5.493	1	1	NotSig	Bacteria	Proteobacteria	Betaproteobacteria	Unassigned	Unassigned	Unassigned	0	0	0	0	0	0	0	0	0	0	0	0	0	0	0	0	0	0	0	0	0	0
OTU704	0	5.493	1	1	NotSig	Bacteria	Deinococcus-Thermus	Deinococci	Deinococcales	Deinococcaceae	Deinococcus	0	0	0	0	0	0	0	0	0	0	0	0	0	0	0	0	0	0	0	0	0	0
OTU706	0	5.493	1	1	NotSig	Bacteria	Planctomycetes	Planctomycetia	Planctomycetales	Planctomycetaceae	Aquisphaera	0	0	0	0	0	0	0	0	0	0	0	0	0	0	0	0	0	0	0	0	0	0
OTU729	0	5.493	1	1	NotSig	Bacteria	Actinobacteria	Actinobacteria	Bifidobacteriales	Bifidobacteriaceae	Bifidobacterium	0	0	0	0	0	0	0	0	0	0	0	0	0	0	0	0	0	0	0	0	0	0
OTU912	0	5.493	1	1	NotSig	Bacteria	Firmicutes	Unassigned	Unassigned	Unassigned	Unassigned	0	0	0	0	0	0	0	0	0	0	0	0	0	0	0	0	0	0	0	0	0	0
OTU948	0	5.493	1	1	NotSig	Bacteria	Firmicutes	Clostridia	Clostridiales	Unassigned	Unassigned	0	0	0	0	0	0	0	0	0	0	0	0	0	0	0	0	0	0	0	0	0	0
OTU962	0	5.493	1	1	NotSig	Bacteria	Firmicutes	Unassigned	Unassigned	Unassigned	Unassigned	0	0	0	0	0	0	0	0	0	0	0	0	0	0	0	0	0	0	0	0	0	0
OTU977	0	5.493	1	1	NotSig	Bacteria	Firmicutes	Clostridia	Clostridiales	Ruminococcaceae	Unassigned	0	0	0	0	0	0	0	0	0	0	0	0	0	0	0	0	0	0	0	0	0	0
OTU985	0	5.493	1	1	NotSig	Bacteria	Firmicutes	Clostridia	Clostridiales	Eubacteriaceae	Unassigned	0	0	0	0	0	0	0	0	0	0	0	0	0	0	0	0	0	0	0	0	0	0
