# Supplementary material for: Impact of Phellinus gilvus mycelia on growth, immunity and fecal microbiota in weaned piglets
Source: PeerJ. 2020 Apr 28;8:e9067. doi: 10.7717/peerj.9067 (PMC7194088; doi:10.7717/peerj.9067)
Supplement: File S7 [file peerj-08-9067-s007.xlsx]

## Sheet: Sheet1
														C	C	C	C	C	C	C	C	C	C	SH	SH	SH	SH	SH	SH	SH	SH	SH	SH
OTUID	logFC	logCPM	PValue	FDR	level	Kindom	Phylum	Class	Order	Family	Genus	MeanA	MeanB	WK1	WK2	WK3	WK4	WK5	WK6	WK7	WK8	WK9	WK10	JS1	JS2	JS3	JS4	JS5	JS6	JS7	JS8	JS9	JS10
OTU638	-5.497	7.275	1.09e-06	0.00190089	Depleted	Bacteria	Bacteroidetes	Bacteroidia	Bacteroidales	Porphyromonadaceae	Unassigned	0	0.022	0	0	0	0	0.002	0	0	0	0	0	0.068	0.014	0.037	0.003	0.005	0.018	0	0.01	0.053	0.007
OTU1111	5.866	7.662	7.03e-06	0.00614037	Enriched	Bacteria	Unassigned	Unassigned	Unassigned	Unassigned	Unassigned	0.034	0	0.115	0.01	0.036	0	0.029	0.132	0.011	0.002	0.002	0	0.003	0	0	0	0	0	0	0	0	0
OTU39	9.754	10.323	1.2e-05	0.00697416	Enriched	Bacteria	Proteobacteria	Gammaproteobacteria	Pseudomonadales	Moraxellaceae	Acinetobacter	0.223	0	0	0.017	2.213	0	0	0	0	0	0	0	0	0	0	0	0	0	0	0	0	0
OTU131	8.422	9.064	3.55e-05	0.0116287	Enriched	Bacteria	Firmicutes	Bacilli	Bacillales	Planococcaceae	Kurthia	0.09	0	0	0.09	0.813	0	0	0	0	0	0	0	0	0	0	0	0	0	0	0	0	0
OTU422	8.721	9.341	4.02e-05	0.0116287	Enriched	Bacteria	Bacteroidetes	Flavobacteriia	Flavobacteriales	Flavobacteriaceae	Unassigned	0.109	0	0	0.002	1.085	0	0	0	0	0	0	0	0	0	0	0	0	0	0	0	0	0
OTU324	-6.159	7.192	4.96e-05	0.0116287	Depleted	Bacteria	Firmicutes	Unassigned	Unassigned	Unassigned	Unassigned	0	0.019	0	0	0	0	0	0	0	0	0	0	0.011	0	0	0.128	0.003	0	0	0.047	0	0.002
OTU649	-6.77	7.646	5.16e-05	0.0116287	Depleted	Bacteria	Bacteroidetes	Bacteroidia	Bacteroidales	Porphyromonadaceae	Unassigned	0	0.034	0	0	0	0	0	0	0	0	0	0	0	0.259	0.003	0	0	0	0	0	0.075	0.002
OTU678	-6.308	8.896	5.32e-05	0.0116287	Depleted	Bacteria	Bacteroidetes	Bacteroidia	Bacteroidales	Porphyromonadaceae	Unassigned	0.001	0.095	0	0	0	0	0.005	0	0	0	0.002	0	0.025	0	0.003	0.005	0.005	0.906	0	0.006	0	0.002
OTU1182	-5.393	8.627	6.86e-05	0.0128715	Depleted	Bacteria	Firmicutes	Clostridia	Clostridiales	Lachnospiraceae	Unassigned	0.001	0.066	0	0	0	0	0.005	0	0.004	0.004	0	0	0.005	0	0.132	0.003	0.246	0.011	0.243	0	0	0.016
OTU99	8.031	8.71	8.04e-05	0.0128715	Enriched	Bacteria	Proteobacteria	Betaproteobacteria	Burkholderiales	Comamonadaceae	Comamonas	0.067	0	0	0.005	0.67	0	0	0	0	0	0	0	0	0	0	0	0	0	0	0	0	0
OTU1493	-6.45	7.405	8.22e-05	0.0128715	Depleted	Bacteria	Firmicutes	Clostridia	Clostridiales	Ruminococcaceae	Ruminococcus	0	0.024	0	0	0	0	0	0	0	0	0	0	0.008	0	0	0.005	0	0	0	0.006	0	0.22
OTU1268	-6.799	8.328	8.84e-05	0.0128715	Depleted	Bacteria	Firmicutes	Clostridia	Clostridiales	Unassigned	Unassigned	0	0.049	0	0	0	0	0	0	0	0	0	0.002	0	0.003	0	0	0.145	0.018	0.323	0	0	0
OTU701	-6.557	7.479	0.00011427	0.0145848	Depleted	Bacteria	Proteobacteria	Betaproteobacteria	Unassigned	Unassigned	Unassigned	0	0.027	0	0	0	0	0	0	0	0	0	0	0	0.04	0	0	0.211	0	0.021	0	0	0
OTU172	4.514	6.275	0.000116812	0.0145848	Enriched	Bacteria	Firmicutes	Bacilli	Lactobacillales	Streptococcaceae	Streptococcus	0.007	0	0.022	0.002	0.002	0.014	0	0.008	0.008	0.01	0	0	0	0	0	0	0	0	0	0	0	0
OTU160	-6.216	7.229	0.000168289	0.0193104	Depleted	Bacteria	Unassigned	Unassigned	Unassigned	Unassigned	Unassigned	0	0.02	0	0	0	0	0	0	0	0	0	0	0	0.043	0	0	0.071	0	0.087	0	0	0
OTU326	-6.276	7.282	0.000176755	0.0193104	Depleted	Bacteria	Firmicutes	Negativicutes	Selenomonadales	Veillonellaceae	Schwartzia	0	0.024	0	0	0	0	0	0	0	0	0	0	0	0	0	0	0.022	0.196	0.019	0	0	0
OTU453	7.318	8.091	0.000195576	0.0201098	Enriched	Bacteria	Bacteroidetes	Flavobacteriia	Flavobacteriales	Flavobacteriaceae	Empedobacter	0.041	0	0	0.01	0.402	0	0	0	0	0	0	0	0	0	0	0	0	0	0	0	0	0
OTU1418	-3.276	7.11	0.000217661	0.0211373	Depleted	Bacteria	Firmicutes	Clostridia	Clostridiales	Lachnospiraceae	Lachnospiracea_incertae_sedis	0.002	0.016	0	0.01	0.002	0	0	0	0	0.002	0.002	0	0.014	0.006	0.005	0.021	0.008	0.025	0.019	0.028	0.027	0.005
OTU62	7.066	7.884	0.000257053	0.0236489	Enriched	Bacteria	Proteobacteria	Gammaproteobacteria	Pseudomonadales	Moraxellaceae	Acinetobacter	0.035	0	0	0.015	0.333	0	0	0	0	0	0	0	0	0	0	0	0	0	0	0	0	0
OTU58	7.38	8.865	0.000359167	0.0313912	Enriched	Bacteria	Proteobacteria	Gammaproteobacteria	Pseudomonadales	Moraxellaceae	Acinetobacter	0.076	0	0	0.002	0.755	0	0	0	0	0	0	0	0	0	0	0	0	0.002	0	0	0	0
OTU1280	-3.321	7.216	0.000394216	0.0320836	Depleted	Bacteria	Firmicutes	Clostridia	Clostridiales	Unassigned	Unassigned	0.002	0.02	0	0.005	0	0	0.004	0.003	0.002	0.002	0	0.002	0.115	0.006	0.011	0.003	0.019	0.002	0.005	0.004	0.007	0.027
OTU84	4.442	11.366	0.000431	0.0320836	Enriched	Bacteria	Spirochaetes	Spirochaetia	Spirochaetales	Spirochaetaceae	Treponema	0.459	0.025	0.043	0.153	0.175	2.909	0	0	0.124	0.96	0.119	0.103	0.117	0.095	0	0.013	0	0	0	0.01	0.009	0.002
OTU1253	7.125	10.374	0.000445191	0.0320836	Enriched	Bacteria	Firmicutes	Clostridia	Clostridiales	Ruminococcaceae	Ruminococcus	0.261	0.001	0	0.01	0	0	2.575	0	0	0	0	0.03	0	0	0	0.008	0	0	0	0	0.007	0
OTU250	5.064	8.843	0.000448963	0.0320836	Enriched	Bacteria	Spirochaetes	Spirochaetia	Spirochaetales	Spirochaetaceae	Treponema	0.08	0.002	0.086	0.109	0.072	0.056	0	0	0	0	0	0.481	0.003	0	0	0.003	0.003	0	0	0.01	0	0
OTU425	-3.796	7.818	0.000458862	0.0320836	Depleted	Bacteria	Bacteroidetes	Unassigned	Unassigned	Unassigned	Unassigned	0.002	0.035	0	0	0	0.002	0.014	0.003	0.002	0	0	0	0.106	0.012	0.063	0.102	0.014	0.007	0	0.038	0.004	0.002
OTU731	7.062	9.125	0.000604931	0.04067	Enriched	Bacteria	Verrucomicrobia	Verrucomicrobiae	Verrucomicrobiales	Verrucomicrobiaceae	Akkermansia	0.1	0	0	0.046	0	0	0	0	0	0	0	0.949	0	0	0	0	0	0	0	0	0	0.005
OTU710	-3.153	12.087	0.000669373	0.0433357	Depleted	Bacteria	Firmicutes	Clostridia	Clostridiales	Lachnospiraceae	Clostridium_XlVa	0.093	0.72	0.199	0.019	0.09	0	0.169	0.048	0.03	0.227	0.027	0.117	0.09	0.081	0.224	0.149	3.308	0.207	2.881	0.107	0.027	0.127
OTU856	2.921	9.915	0.000826352	0.051588	Enriched	Bacteria	Firmicutes	Unassigned	Unassigned	Unassigned	Unassigned	0.171	0.019	0.636	0.053	0.422	0.005	0.12	0.17	0.077	0.037	0.01	0.181	0.008	0.017	0.003	0.037	0	0.014	0.002	0.042	0.049	0.02
OTU17	-3.237	10.632	0.000921493	0.0544247	Depleted	Bacteria	Firmicutes	Negativicutes	Selenomonadales	Veillonellaceae	Unassigned	0.031	0.284	0.01	0.029	0.004	0.007	0.081	0.013	0.008	0.138	0.015	0.01	0.112	0.34	0.053	0	1.763	0.095	0.208	0.002	0.007	0.261
OTU65	6.106	7.159	0.000934063	0.0544247	Enriched	Bacteria	Proteobacteria	Gammaproteobacteria	Pseudomonadales	Moraxellaceae	Acinetobacter	0.018	0	0	0.012	0.166	0	0	0	0	0	0	0	0	0	0	0	0	0	0	0	0	0
OTU1458	6.196	7.223	0.000977125	0.0550973	Enriched	Bacteria	Firmicutes	Clostridia	Clostridiales	Lachnospiraceae	Unassigned	0.021	0	0	0	0	0	0	0.003	0	0	0.211	0	0	0	0	0	0	0	0	0	0	0
OTU960	3.826	6.023	0.0013226	0.072247	Enriched	Bacteria	Firmicutes	Clostridia	Unassigned	Unassigned	Unassigned	0.004	0	0.002	0.002	0.009	0.014	0.004	0	0	0	0.005	0	0	0	0	0	0	0	0	0	0	0
OTU1134	-4.399	6.217	0.00139865	0.0740859	Depleted	Bacteria	Firmicutes	Clostridia	Clostridiales	Ruminococcaceae	Unassigned	0	0.006	0	0	0	0	0	0	0	0	0	0	0	0.037	0	0.008	0.003	0	0	0.012	0	0
OTU551	-4.347	6.197	0.00145165	0.0745912	Depleted	Bacteria	Bacteroidetes	Bacteroidia	Bacteroidales	Prevotellaceae	Prevotella	0	0.006	0	0	0	0	0	0	0	0	0	0	0.033	0	0.018	0	0	0.007	0	0	0.002	0
OTU1267	-4.708	7.608	0.00149353	0.0745912	Depleted	Bacteria	Firmicutes	Clostridia	Clostridiales	Unassigned	Unassigned	0.001	0.029	0	0	0	0	0	0	0	0	0	0.008	0	0.086	0	0.003	0.096	0	0.096	0.004	0	0.002
OTU1482	-3.841	6.016	0.00172417	0.082728	Depleted	Bacteria	Firmicutes	Clostridia	Clostridiales	Ruminococcaceae	Ruminococcus	0	0.004	0	0	0	0	0	0	0	0	0	0	0.011	0	0.003	0	0	0.023	0	0.002	0	0.002
OTU1588	-3.762	7.453	0.00179153	0.082728	Depleted	Bacteria	Firmicutes	Clostridia	Clostridiales	Lachnospiraceae	Unassigned	0.002	0.023	0	0.002	0	0	0	0.003	0	0	0.005	0.006	0	0.006	0.008	0	0.115	0.002	0.089	0.004	0.002	0.002
OTU166	-3.211	7.574	0.00179843	0.082728	Depleted	Bacteria	Proteobacteria	Gammaproteobacteria	Pasteurellales	Pasteurellaceae	Unassigned	0.003	0.028	0	0.002	0	0	0	0.013	0.006	0.004	0	0.002	0.066	0.107	0.011	0.008	0.038	0.007	0.033	0	0.013	0
OTU833	2.356	10.2	0.00188255	0.0843767	Enriched	Bacteria	Firmicutes	Unassigned	Unassigned	Unassigned	Unassigned	0.199	0.034	0.639	0.215	0.218	0.319	0.056	0.061	0.041	0.067	0.347	0.024	0.003	0.043	0.005	0.047	0.019	0.074	0.023	0.075	0.029	0.025
OTU872	4.375	7.008	0.0022831	0.09747	Enriched	Bacteria	Firmicutes	Clostridia	Clostridiales	Unassigned	Unassigned	0.016	0.001	0	0.044	0	0.068	0.002	0	0.004	0	0.04	0	0	0	0.003	0	0.003	0	0	0	0	0
OTU466	-5.745	6.916	0.00232302	0.09747	Depleted	Bacteria	Bacteroidetes	Bacteroidia	Bacteroidales	Prevotellaceae	Prevotella	0	0.016	0	0	0	0	0	0	0	0	0	0	0.164	0	0	0	0	0	0	0	0	0
OTU200	5.969	7.065	0.00235846	0.09747	Enriched	Bacteria	Proteobacteria	Betaproteobacteria	Neisseriales	Neisseriaceae	Vitreoscilla	0.016	0	0	0	0.16	0	0	0	0	0	0	0	0	0	0	0	0	0	0	0	0	0
OTU464	-5.721	6.901	0.00239772	0.09747	Depleted	Bacteria	Bacteroidetes	Bacteroidia	Bacteroidales	Prevotellaceae	Prevotella	0	0.016	0	0	0	0	0	0	0	0	0	0	0.161	0	0	0	0	0	0	0	0	0
OTU1026	-2.421	8.165	0.00274278	0.108963	Depleted	Bacteria	Firmicutes	Clostridia	Clostridiales	Lachnospiraceae	Clostridium_XlVa	0.008	0.045	0.014	0.01	0	0	0.009	0.02	0.004	0.012	0.005	0.006	0.005	0.222	0.082	0.021	0.036	0.018	0.023	0.018	0.011	0.011
OTU194	5.73	6.91	0.00318554	0.12374	Enriched	Bacteria	Proteobacteria	Betaproteobacteria	Burkholderiales	Comamonadaceae	Comamonas	0.013	0	0	0	0.135	0	0	0	0	0	0	0	0	0	0	0	0	0	0	0	0	0
OTU173	4.919	7.006	0.00328428	0.123974	Enriched	Bacteria	Firmicutes	Erysipelotrichia	Erysipelotrichales	Erysipelotrichaceae	Sharpea	0.017	0	0	0	0	0	0.002	0.005	0	0	0.159	0.002	0	0	0	0	0	0	0	0	0.002	0
OTU228	5.117	6.556	0.0033334	0.123974	Enriched	Bacteria	Firmicutes	Bacilli	Bacillales	Bacillaceae_1	Bacillus	0.009	0	0	0.017	0.074	0	0	0	0	0	0	0	0	0	0	0	0	0	0	0	0	0
OTU66	5.633	6.849	0.00361109	0.131504	Enriched	Bacteria	Proteobacteria	Gammaproteobacteria	Pseudomonadales	Moraxellaceae	Acinetobacter	0.013	0	0	0	0.126	0	0	0	0	0	0	0	0	0	0	0	0	0	0	0	0	0
OTU132	4.816	8.277	0.00408301	0.144146	Enriched	Bacteria	Firmicutes	Negativicutes	Selenomonadales	Veillonellaceae	Mitsuokella	0.05	0.002	0	0	0	0.131	0.013	0	0	0	0.357	0.002	0	0	0	0	0	0.009	0	0	0	0.007
OTU803	3.438	10.792	0.00412316	0.144146	Enriched	Bacteria	Firmicutes	Clostridia	Clostridiales	Unassigned	Unassigned	0.325	0.028	1.299	0.116	1.629	0.016	0.005	0.003	0.002	0.006	0.005	0.169	0.003	0.063	0	0.063	0	0.043	0	0.055	0.049	0
OTU815	2.649	8.476	0.00433533	0.148273	Enriched	Bacteria	Firmicutes	Unassigned	Unassigned	Unassigned	Unassigned	0.051	0.007	0.033	0.027	0.025	0.037	0.054	0.013	0.229	0.041	0.017	0.034	0	0	0	0.01	0	0.014	0	0.008	0.035	0.007
OTU671	-2.984	9.004	0.00442521	0.148273	Depleted	Bacteria	Bacteroidetes	Bacteroidia	Bacteroidales	Unassigned	Unassigned	0.011	0.092	0.012	0.022	0	0.002	0.032	0	0	0.026	0	0.016	0.265	0.501	0.013	0.029	0.003	0.005	0.002	0.016	0.084	0.005
OTU1683	2.352	7.697	0.00449569	0.148273	Enriched	Bacteria	Firmicutes	Clostridia	Clostridiales	Ruminococcaceae	Unassigned	0.027	0.005	0.055	0.002	0.016	0.094	0.025	0.008	0.008	0.032	0.02	0.012	0.019	0.003	0	0.003	0	0.011	0.005	0.002	0.002	0.007
OTU1274	3.863	7.514	0.00478943	0.153785	Enriched	Bacteria	Firmicutes	Clostridia	Clostridiales	Unassigned	Unassigned	0.027	0.002	0.024	0	0.009	0	0.007	0	0.023	0.016	0.188	0	0	0.003	0	0	0	0.014	0	0	0	0
OTU467	5.385	6.702	0.00491214	0.153785	Enriched	Bacteria	Bacteroidetes	Flavobacteriia	Flavobacteriales	Flavobacteriaceae	Flavobacterium	0.011	0	0	0	0.106	0	0	0	0	0	0	0	0	0	0	0	0	0	0	0	0	0
OTU230	-3.607	6.218	0.00504223	0.153785	Depleted	Bacteria	Proteobacteria	Betaproteobacteria	Burkholderiales	Sutterellaceae	Sutterella	0	0.006	0	0	0	0	0.002	0	0	0	0	0	0.014	0.017	0.026	0	0	0	0.002	0	0.002	0
OTU171	5.354	6.684	0.0050957	0.153785	Enriched	Bacteria	Proteobacteria	Betaproteobacteria	Burkholderiales	Comamonadaceae	Unassigned	0.01	0	0	0	0.103	0	0	0	0	0	0	0	0	0	0	0	0	0	0	0	0	0
OTU804	2.222	10.064	0.00517387	0.153785	Enriched	Bacteria	Firmicutes	Unassigned	Unassigned	Unassigned	Unassigned	0.16	0.034	0.108	0.08	0.049	0.016	0.013	0.074	0.89	0.043	0.206	0.117	0.057	0.009	0.024	0.044	0.027	0.009	0.03	0.061	0.011	0.064
OTU730	4.401	6.224	0.00519068	0.153785	Enriched	Bacteria	Actinobacteria	Actinobacteria	Actinomycetales	Corynebacteriaceae	Corynebacterium	0.005	0	0.002	0.007	0.045	0	0	0	0	0	0	0	0	0	0	0	0	0	0	0	0	0
OTU766	4.227	9.422	0.00581402	0.169382	Enriched	Bacteria	Actinobacteria	Actinobacteria	Coriobacteriales	Coriobacteriaceae	Olsenella	0.125	0.005	0	0.005	0	0	0.014	0.013	0.002	0	1.194	0.022	0	0.003	0	0	0	0.005	0	0	0.042	0.005
OTU739	2.036	11.674	0.00612263	0.175448	Enriched	Bacteria	Firmicutes	Clostridia	Clostridiales	Ruminococcaceae	Clostridium_IV	0.526	0.12	0.277	0.903	0.101	0.532	0.411	0.061	0.561	0.168	2.037	0.209	0.011	0.017	0.129	0.068	0.202	0.223	0.159	0.057	0.241	0.088
OTU1392	-3.6	6.933	0.00649654	0.179723	Depleted	Bacteria	Firmicutes	Clostridia	Clostridiales	Lachnospiraceae	Unassigned	0.001	0.013	0	0	0.007	0	0	0	0.002	0	0	0	0	0.009	0.003	0.055	0.011	0	0.005	0.047	0	0
OTU982	-3.265	5.859	0.00650606	0.179723	Depleted	Bacteria	Elusimicrobia	Elusimicrobia	Elusimicrobiales	Elusimicrobiaceae	Elusimicrobium	0	0.003	0	0	0	0	0	0	0	0	0	0	0.008	0.014	0	0.003	0	0	0	0.002	0	0
OTU965	2.774	5.761	0.00674148	0.179723	Enriched	Bacteria	Firmicutes	Clostridia	Clostridiales	Unassigned	Unassigned	0.002	0	0.002	0.002	0	0.002	0	0.003	0.002	0.006	0	0	0	0	0	0	0	0	0	0	0	0
OTU919	4.033	6.09	0.0067875	0.179723	Enriched	Bacteria	Firmicutes	Clostridia	Clostridiales	Ruminococcaceae	Unassigned	0.004	0	0	0.012	0	0	0	0	0.008	0	0	0.024	0	0	0	0	0	0	0	0	0	0
OTU1087	2.833	8.575	0.00687744	0.179723	Enriched	Bacteria	Unassigned	Unassigned	Unassigned	Unassigned	Unassigned	0.064	0.008	0.359	0.007	0.195	0	0.029	0	0	0.008	0.012	0.03	0.022	0.006	0.003	0.008	0.011	0	0.002	0.008	0.015	0.002
OTU1646	-2.697	6.116	0.00688869	0.179723	Depleted	Bacteria	Firmicutes	Clostridia	Clostridiales	Lachnospiraceae	Unassigned	0	0.004	0	0	0	0	0.002	0	0	0	0.002	0	0.005	0.006	0.008	0	0.008	0.002	0.012	0	0	0.002
OTU1255	-2.397	9.75	0.00761164	0.195664	Depleted	Bacteria	Firmicutes	Clostridia	Clostridiales	Unassigned	Unassigned	0.027	0.124	0	0.015	0.009	0.007	0.018	0.112	0.013	0.03	0.012	0.05	0.068	0.058	0.042	0.295	0.005	0.038	0.007	0.398	0.002	0.327
OTU1449	4.159	6.919	0.00818724	0.20659	NotSig	Bacteria	Proteobacteria	Unassigned	Unassigned	Unassigned	Unassigned	0.014	0	0.007	0.029	0.016	0	0	0	0	0	0	0.093	0	0	0	0	0	0	0	0.004	0	0
OTU808	2.156	9.134	0.00842556	0.20659	NotSig	Bacteria	Firmicutes	Clostridia	Clostridiales	Unassigned	Unassigned	0.087	0.018	0.273	0.053	0.218	0.089	0.009	0.01	0.011	0.002	0.169	0.036	0.011	0.032	0.008	0.021	0.005	0.009	0.002	0.024	0.042	0.023
OTU962	-3.13	5.828	0.00859963	0.20659	NotSig	Bacteria	Firmicutes	Unassigned	Unassigned	Unassigned	Unassigned	0	0.002	0	0	0	0	0	0	0	0	0	0	0	0.017	0	0.003	0	0	0	0.002	0.002	0
OTU559	-3.017	5.805	0.00864442	0.20659	NotSig	Bacteria	Bacteroidetes	Bacteroidia	Bacteroidales	Prevotellaceae	Prevotella	0	0.002	0	0	0	0	0	0	0	0	0	0	0.011	0	0	0.005	0	0	0	0.002	0.002	0
OTU149	-4.815	6.886	0.0086882	0.20659	NotSig	Bacteria	Firmicutes	Negativicutes	Selenomonadales	Veillonellaceae	Megamonas	0	0.014	0	0	0	0	0	0	0	0	0.002	0	0	0.003	0	0	0	0	0	0	0	0.136
OTU845	-3.122	6.623	0.00897728	0.20659	NotSig	Bacteria	Firmicutes	Clostridia	Clostridiales	Ruminococcaceae	Butyricicoccus	0.001	0.01	0	0	0	0	0	0.005	0.002	0.002	0	0	0	0	0.021	0	0.005	0.047	0.021	0.002	0	0.002
OTU820	-3.25	8.148	0.00902964	0.20659	NotSig	Bacteria	Firmicutes	Clostridia	Clostridiales	Unassigned	Unassigned	0.004	0.039	0	0	0.002	0	0.004	0.005	0.013	0.014	0.005	0	0.003	0	0.016	0	0.098	0.034	0.239	0.002	0	0
OTU725	2.03	10.897	0.00924867	0.20659	NotSig	Bacteria	Firmicutes	Clostridia	Clostridiales	Unassigned	Unassigned	0.31	0.073	0.117	0.16	0.072	0.112	0.276	0.096	0.058	0.361	1.841	0.01	0.041	0.196	0.063	0.018	0.109	0.088	0.124	0.047	0.035	0.011
OTU480	4.489	6.254	0.00928	0.20659	NotSig	Bacteria	Bacteroidetes	Bacteroidia	Bacteroidales	Bacteroidaceae	Bacteroides	0.005	0	0	0.002	0	0.052	0	0	0	0	0	0	0	0	0	0	0	0	0	0	0	0
OTU176	-4.68	6.348	0.00929513	0.20659	NotSig	Bacteria	Unassigned	Unassigned	Unassigned	Unassigned	Unassigned	0	0.008	0	0	0	0	0	0	0	0	0	0	0	0	0	0	0	0.079	0	0	0	0
OTU660	3.751	6.353	0.00933673	0.20659	NotSig	Bacteria	Bacteroidetes	Unassigned	Unassigned	Unassigned	Unassigned	0.007	0	0.017	0.007	0.031	0	0	0	0	0	0	0.014	0	0	0	0.003	0	0	0	0	0	0
OTU724	2.211	12.593	0.0095584	0.208851	NotSig	Bacteria	Actinobacteria	Actinobacteria	Coriobacteriales	Coriobacteriaceae	Collinsella	0.964	0.213	0.041	0.259	0.04	4.527	1.47	0.72	0.124	1.539	0.865	0.056	0.128	0.006	0.084	0.044	0.186	0.701	0.297	0.083	0.175	0.426
OTU295	-2.238	10.309	0.00979407	0.211358	NotSig	Bacteria	Fibrobacteres	Fibrobacteria	Fibrobacterales	Fibrobacteraceae	Fibrobacter	0.043	0.179	0.012	0.102	0.031	0.066	0.013	0.036	0.028	0.067	0.01	0.068	0.194	0.084	0.132	0.16	0.003	0.043	0.002	0.162	1.004	0.005
OTU1700	4.239	6.162	0.0105951	0.225857	NotSig	Bacteria	Firmicutes	Clostridia	Clostridiales	Peptoniphilaceae	Unassigned	0.005	0	0	0.036	0.018	0	0	0	0	0	0	0	0	0	0	0	0	0	0	0	0	0
OTU836	-3.46	6.583	0.0112169	0.2259	NotSig	Bacteria	Firmicutes	Clostridia	Clostridiales	Ruminococcaceae	Unassigned	0.001	0.011	0.002	0.002	0	0	0.002	0	0	0	0	0	0	0.066	0	0	0.027	0.002	0.009	0	0	0
OTU162	-2.647	6.595	0.0112417	0.2259	NotSig	Bacteria	Unassigned	Unassigned	Unassigned	Unassigned	Unassigned	0.001	0.009	0	0.002	0	0	0.005	0	0.002	0	0	0.002	0.033	0.029	0	0.016	0.003	0	0.002	0.008	0.004	0
OTU220	3.821	6.017	0.0113031	0.2259	NotSig	Bacteria	Firmicutes	Bacilli	Lactobacillales	Aerococcaceae	Unassigned	0.004	0	0	0.007	0.027	0	0.002	0	0	0	0	0	0	0	0	0	0	0	0	0	0	0
OTU83	2.516	10.558	0.0113899	0.2259	NotSig	Bacteria	Spirochaetes	Spirochaetia	Spirochaetales	Spirochaetaceae	Treponema	0.25	0.045	0.32	0.01	1.029	0.002	0.007	0.705	0.098	0.26	0.067	0	0.008	0.014	0.095	0.034	0.003	0.164	0.002	0.018	0.002	0.113
OTU1364	-4.02	6.077	0.0114945	0.2259	NotSig	Bacteria	Firmicutes	Clostridia	Clostridiales	Unassigned	Unassigned	0	0.004	0	0	0	0	0	0	0	0	0	0	0	0	0	0	0	0	0	0	0.009	0.032
OTU107	-2.907	9.284	0.0115187	0.2259	NotSig	Bacteria	Firmicutes	Bacilli	Lactobacillales	Lactobacillaceae	Lactobacillus	0.015	0.115	0.012	0.077	0	0	0.002	0.008	0.006	0.002	0.035	0.006	0	0.13	0.963	0.003	0.005	0.016	0.012	0.004	0	0.018
OTU77	4.187	6.141	0.0116291	0.2259	NotSig	Bacteria	Proteobacteria	Gammaproteobacteria	Xanthomonadales	Xanthomonadaceae	Wohlfahrtiimonas	0.005	0	0	0.017	0.031	0	0	0	0	0	0	0	0	0	0	0	0	0	0	0	0	0
OTU449	-4.369	7.194	0.011631	0.2259	NotSig	Bacteria	Bacteroidetes	Bacteroidia	Bacteroidales	Porphyromonadaceae	Unassigned	0.001	0.024	0.002	0	0.002	0	0	0.003	0	0	0	0	0	0.233	0	0	0	0	0	0	0.002	0
OTU842	-3.174	5.838	0.012391	0.238016	NotSig	Bacteria	Firmicutes	Clostridia	Clostridiales	Unassigned	Unassigned	0	0.002	0	0	0	0	0	0	0	0	0	0	0	0	0.008	0	0	0.011	0.005	0	0	0
OTU1473	2.092	6.13	0.0128858	0.244831	NotSig	Bacteria	Firmicutes	Clostridia	Clostridiales	Eubacteriaceae	Anaerofustis	0.004	0.001	0.005	0.005	0	0.005	0.005	0.005	0.004	0.002	0.007	0.004	0	0	0	0.003	0	0	0	0	0	0.005
OTU726	-1.952	9.437	0.0133677	0.251256	NotSig	Bacteria	Firmicutes	Clostridia	Clostridiales	Unassigned	Unassigned	0.027	0.102	0.007	0.061	0.011	0	0.005	0.028	0.032	0.026	0.04	0.062	0.093	0.014	0.106	0.005	0.057	0.221	0.117	0.016	0.08	0.311
OTU247	-3.162	5.836	0.0135398	0.251783	NotSig	Bacteria	Unassigned	Unassigned	Unassigned	Unassigned	Unassigned	0	0.002	0	0	0	0	0	0	0	0	0	0	0	0	0	0.005	0	0.005	0	0.01	0	0
OTU1467	-3.016	6.558	0.0138172	0.254236	NotSig	Bacteria	Firmicutes	Clostridia	Clostridiales	Lachnospiraceae	Unassigned	0.001	0.009	0.005	0	0.002	0	0	0	0	0	0	0.002	0	0.009	0.011	0	0.019	0	0.009	0	0	0.041
OTU48	-3.194	13.802	0.0140506	0.255838	NotSig	Bacteria	Bacteroidetes	Bacteroidia	Bacteroidales	Prevotellaceae	Prevotella	0.28	2.219	0.624	0.012	1.272	0.063	0.005	0.084	0	0	0.637	0.099	2.801	0.17	0	6.571	0.003	0.228	0	7.358	5.051	0.005
OTU1262	-2.514	9.454	0.0144329	0.25727	NotSig	Bacteria	Firmicutes	Clostridia	Clostridiales	Eubacteriaceae	Eubacterium	0.02	0.116	0	0.002	0	0	0.138	0.025	0.004	0.016	0.01	0.004	0.008	0.285	0.042	0.071	0.011	0.541	0.026	0.17	0.002	0.007
OTU544	-3.093	5.82	0.0145061	0.25727	NotSig	Bacteria	Bacteroidetes	Bacteroidia	Bacteroidales	Prevotellaceae	Prevotella	0	0.002	0	0	0	0	0	0	0	0	0	0	0.011	0	0.011	0	0	0.002	0	0	0	0
OTU807	1.864	9.049	0.014831	0.25727	NotSig	Bacteria	Unassigned	Unassigned	Unassigned	Unassigned	Unassigned	0.074	0.019	0.081	0.077	0.027	0.288	0.07	0.033	0.041	0.026	0.082	0.014	0.019	0.012	0	0.026	0.046	0.009	0.012	0.04	0.022	0.005
OTU948	-3.85	6.016	0.0149161	0.25727	NotSig	Bacteria	Firmicutes	Clostridia	Clostridiales	Unassigned	Unassigned	0	0.004	0	0	0	0	0	0	0	0	0	0	0	0	0	0	0.019	0	0.016	0	0	0
OTU811	1.98	8.962	0.0149599	0.25727	NotSig	Bacteria	Firmicutes	Unassigned	Unassigned	Unassigned	Unassigned	0.076	0.017	0.146	0.005	0.047	0.009	0.038	0.058	0.051	0.104	0.287	0.016	0.057	0.009	0.008	0.013	0.003	0.023	0	0.038	0.018	0.005
OTU1570	-3.125	5.827	0.0150123	0.25727	NotSig	Bacteria	Proteobacteria	Alphaproteobacteria	Unassigned	Unassigned	Unassigned	0	0.002	0	0	0	0	0	0	0	0	0	0	0.005	0.003	0	0.016	0	0	0	0	0	0
OTU87	-2.222	9.736	0.0153142	0.257457	NotSig	Bacteria	Unassigned	Unassigned	Unassigned	Unassigned	Unassigned	0.03	0.135	0.05	0.029	0.054	0.002	0	0.056	0.002	0.014	0.072	0.018	0.016	0.233	0.008	0.05	0.005	0.241	0.03	0.049	0.004	0.717
OTU1155	4.031	6.09	0.0153694	0.257457	NotSig	Bacteria	Firmicutes	Clostridia	Clostridiales	Lachnospiraceae	Unassigned	0.005	0	0	0.046	0	0	0	0	0	0	0	0.004	0	0	0	0	0	0	0	0	0	0
OTU1411	-2.764	6.705	0.0156238	0.257457	NotSig	Bacteria	Firmicutes	Clostridia	Clostridiales	Ruminococcaceae	Clostridium_IV	0.001	0.01	0	0	0	0	0.011	0	0	0.002	0	0	0.016	0	0	0.01	0.025	0.005	0.028	0.01	0	0.005
OTU209	3.972	6.067	0.0157566	0.257457	NotSig	Bacteria	Firmicutes	Bacilli	Bacillales	Planococcaceae	Lysinibacillus	0.004	0	0	0.031	0.013	0	0	0	0	0	0	0	0	0	0	0	0	0	0	0	0	0
OTU124	-3.081	7.153	0.0158028	0.257457	NotSig	Bacteria	Proteobacteria	Betaproteobacteria	Burkholderiales	Sutterellaceae	Parasutterella	0.002	0.019	0.002	0	0	0	0.009	0.003	0	0	0.005	0	0.019	0	0.032	0.01	0	0.124	0	0.006	0	0
OTU1439	-2.269	10.483	0.0159069	0.257457	NotSig	Bacteria	Firmicutes	Clostridia	Clostridiales	Clostridiaceae_1	Clostridium_sensu_stricto	0.05	0.224	0	0.082	0.031	0.002	0.03	0.003	0.011	0.189	0.097	0.056	0.197	0.014	0.195	0.003	0.941	0.052	0.449	0.004	0.02	0.367
OTU1664	3.091	6.076	0.0161817	0.258929	NotSig	Bacteria	Unassigned	Unassigned	Unassigned	Unassigned	Unassigned	0.004	0	0	0.002	0	0	0.023	0	0	0.01	0.002	0.004	0	0	0	0	0	0.002	0	0	0	0
OTU188	-4.311	6.178	0.0162942	0.258929	NotSig	Bacteria	Unassigned	Unassigned	Unassigned	Unassigned	Unassigned	0	0.004	0	0	0	0	0	0	0	0	0	0	0	0	0	0	0	0	0	0	0.044	0
OTU1346	-2.833	5.769	0.0172836	0.272178	NotSig	Bacteria	Proteobacteria	Epsilonproteobacteria	Campylobacterales	Campylobacteraceae	Campylobacter	0	0.002	0	0	0	0	0	0	0	0	0	0	0	0.009	0	0.005	0	0	0	0.004	0	0
OTU1428	1.791	6.87	0.0178401	0.278432	NotSig	Bacteria	Firmicutes	Clostridia	Clostridiales	Lachnospiraceae	Howardella	0.012	0.003	0.005	0.007	0.009	0.007	0.011	0.018	0.006	0.024	0.027	0.002	0.003	0.006	0	0	0.003	0.002	0.005	0	0.007	0.005
OTU656	3.118	5.832	0.018964	0.293355	NotSig	Bacteria	Bacteroidetes	Bacteroidia	Bacteroidales	Unassigned	Unassigned	0.002	0	0.005	0	0.009	0	0	0	0	0	0	0.008	0	0	0	0	0	0	0	0	0	0
OTU1712	2.524	5.716	0.0197126	0.300958	NotSig	Bacteria	Firmicutes	Clostridia	Clostridiales	Unassigned	Unassigned	0.001	0	0	0.002	0	0	0.004	0	0.002	0.006	0	0	0	0	0	0	0	0	0	0	0	0
OTU1556	-3.67	5.966	0.0200743	0.300958	NotSig	Bacteria	Firmicutes	Clostridia	Clostridiales	Lachnospiraceae	Unassigned	0	0.004	0	0	0	0	0	0	0	0	0	0	0	0.037	0	0	0.003	0	0	0	0	0
OTU742	-1.861	10.425	0.020156	0.300958	NotSig	Bacteria	Firmicutes	Clostridia	Clostridiales	Lachnospiraceae	Unassigned	0.06	0.233	0.124	0.017	0.128	0	0.057	0.076	0.015	0.118	0.042	0.024	0.281	1.04	0.514	0.089	0.17	0.029	0.016	0.046	0.02	0.127
OTU216	-3.586	5.942	0.0202046	0.300958	NotSig	Bacteria	Unassigned	Unassigned	Unassigned	Unassigned	Unassigned	0	0.004	0	0	0	0	0	0	0	0	0	0	0	0.032	0	0	0	0	0	0	0.004	0
OTU1544	-2.82	5.766	0.0203164	0.300958	NotSig	Bacteria	Firmicutes	Clostridia	Clostridiales	Ruminococcaceae	Unassigned	0	0.002	0	0	0	0	0	0	0	0	0	0	0	0.014	0	0	0	0	0	0.002	0.002	0
OTU67	-3.856	6.664	0.0208253	0.305115	NotSig	Bacteria	Unassigned	Unassigned	Unassigned	Unassigned	Unassigned	0	0.009	0	0	0.004	0	0	0	0	0	0	0	0	0	0	0.01	0	0	0	0.008	0.071	0
OTU1309	-2.728	5.751	0.0210452	0.305115	NotSig	Bacteria	Unassigned	Unassigned	Unassigned	Unassigned	Unassigned	0	0.001	0	0	0	0	0	0	0	0	0	0	0	0	0	0.003	0	0	0.005	0.006	0	0
OTU1265	-3.546	8.749	0.0214161	0.305115	NotSig	Bacteria	Proteobacteria	Epsilonproteobacteria	Campylobacterales	Campylobacteraceae	Campylobacter	0.006	0.086	0	0.005	0.004	0	0.018	0	0	0.012	0	0.02	0.003	0.856	0	0.003	0	0	0	0	0.002	0
OTU1433	2.835	8.165	0.02145	0.305115	NotSig	Bacteria	Firmicutes	Clostridia	Clostridiales	Lachnospiraceae	Unassigned	0.049	0.006	0.007	0.467	0.002	0	0	0.01	0	0	0.002	0	0.005	0.017	0.013	0.003	0.003	0	0.002	0.004	0.004	0.007
OTU1266	-2.976	8.607	0.0215605	0.305115	NotSig	Bacteria	Firmicutes	Clostridia	Clostridiales	Unassigned	Unassigned	0.008	0.063	0.002	0.005	0.002	0	0.005	0	0	0.002	0.062	0	0	0	0.39	0.005	0.098	0	0.124	0	0.007	0.007
OTU1405	3.457	8.366	0.0221531	0.305115	NotSig	Bacteria	Firmicutes	Clostridia	Clostridiales	Lachnospiraceae	Clostridium_XlVa	0.058	0.004	0.399	0	0.106	0	0	0	0.073	0	0	0	0.008	0	0	0	0.003	0	0.002	0	0.009	0.02
OTU639	-2.79	7.979	0.0222178	0.305115	NotSig	Bacteria	Bacteroidetes	Bacteroidia	Bacteroidales	Porphyromonadaceae	Unassigned	0.006	0.038	0.01	0.041	0.002	0	0	0	0	0	0	0.004	0.052	0.009	0.195	0.058	0	0.023	0	0.042	0.002	0
OTU365	-2.02	9.717	0.022596	0.305115	NotSig	Bacteria	Bacteroidetes	Bacteroidia	Bacteroidales	Prevotellaceae	Alloprevotella	0.035	0.134	0.179	0.063	0.013	0	0.005	0.008	0.021	0	0.055	0.01	0.478	0.228	0.011	0.021	0.265	0.155	0.101	0.038	0.009	0.036
OTU406	2.222	10.715	0.0228319	0.305115	NotSig	Bacteria	Bacteroidetes	Unassigned	Unassigned	Unassigned	Unassigned	0.262	0.05	0.469	0.019	0.968	0.482	0.326	0.051	0.049	0.051	0.193	0.01	0.025	0.035	0	0.078	0	0.011	0	0.089	0.25	0.009
OTU1630	-2.331	6.268	0.0229335	0.305115	NotSig	Bacteria	Firmicutes	Clostridia	Clostridiales	Lachnospiraceae	Unassigned	0.001	0.005	0.002	0	0	0	0.002	0.005	0	0	0	0	0	0.006	0	0.003	0.016	0	0.012	0.002	0.002	0.011
OTU1137	2.245	6.331	0.0229672	0.305115	NotSig	Bacteria	Unassigned	Unassigned	Unassigned	Unassigned	Unassigned	0.006	0.001	0.01	0.002	0.013	0	0.022	0.003	0.004	0.002	0	0.004	0	0	0	0.003	0	0	0	0.004	0	0.002
OTU1716	-2.679	5.742	0.0230431	0.305115	NotSig	Bacteria	Firmicutes	Clostridia	Clostridiales	Ruminococcaceae	Unassigned	0	0.001	0	0	0	0	0	0	0	0	0	0	0	0.003	0	0.003	0	0	0	0	0.009	0
OTU769	2.941	5.795	0.0230971	0.305115	NotSig	Bacteria	Actinobacteria	Actinobacteria	Actinomycetales	Micrococcaceae	Kocuria	0.002	0	0	0	0	0	0.013	0	0	0.002	0.005	0	0	0	0	0	0	0	0	0	0	0
OTU1401	3.217	8.207	0.0232886	0.305115	NotSig	Bacteria	Firmicutes	Clostridia	Clostridiales	Lachnospiraceae	Unassigned	0.046	0.005	0	0.01	0	0	0.43	0	0.004	0	0.017	0.002	0.019	0	0.005	0	0	0.002	0	0.002	0	0.018
OTU655	3.216	7.143	0.0233648	0.305115	NotSig	Bacteria	Bacteroidetes	Bacteroidia	Bacteroidales	Porphyromonadaceae	Butyricimonas	0.015	0.002	0.002	0	0.002	0.143	0.002	0	0	0.002	0.002	0	0	0	0	0.008	0	0.007	0	0	0.002	0
OTU254	4.195	6.141	0.0234921	0.305115	NotSig	Bacteria	Proteobacteria	Betaproteobacteria	Burkholderiales	Comamonadaceae	Comamonas	0.004	0	0	0	0.045	0	0	0	0	0	0	0	0	0	0	0	0	0	0	0	0	0
OTU1350	-3.416	5.894	0.023732	0.305115	NotSig	Bacteria	Firmicutes	Clostridia	Clostridiales	Unassigned	Unassigned	0	0.002	0	0	0	0	0	0	0	0	0	0	0	0	0	0	0.005	0	0.019	0	0	0
OTU558	-2.473	5.881	0.023963	0.305115	NotSig	Bacteria	Bacteroidetes	Bacteroidia	Bacteroidales	Prevotellaceae	Prevotella	0	0.003	0.002	0	0	0	0	0	0	0	0	0	0.008	0.006	0.005	0	0.005	0.002	0	0	0	0
OTU1002	2.281	5.688	0.0240833	0.305115	NotSig	Bacteria	Firmicutes	Unassigned	Unassigned	Unassigned	Unassigned	0.001	0	0	0.002	0	0.002	0	0.003	0.002	0	0	0.002	0	0	0	0	0	0	0	0	0	0
OTU1560	-2.637	8.746	0.024088	0.305115	NotSig	Bacteria	Firmicutes	Clostridia	Clostridiales	Lachnospiraceae	Clostridium_XlVa	0.011	0.058	0.05	0.007	0.038	0	0.002	0	0.002	0.006	0	0.006	0	0.052	0.003	0.241	0	0.014	0.002	0.245	0.027	0
OTU137	-3.893	7.593	0.0243376	0.306059	NotSig	Bacteria	Proteobacteria	Betaproteobacteria	Unassigned	Unassigned	Unassigned	0.002	0.024	0.002	0	0.002	0	0	0.013	0	0	0	0	0	0	0	0.123	0	0	0	0.117	0	0
OTU1151	-3.992	6.068	0.0253366	0.316346	NotSig	Bacteria	Unassigned	Unassigned	Unassigned	Unassigned	Unassigned	0	0.005	0	0	0	0	0	0	0	0	0	0	0	0.052	0	0	0	0	0	0	0	0
OTU1445	-2.266	6.884	0.0255422	0.316651	NotSig	Bacteria	Firmicutes	Clostridia	Clostridiales	Lachnospiraceae	Unassigned	0.003	0.013	0.01	0.002	0.002	0	0.004	0	0	0	0.007	0	0	0.003	0.008	0	0.022	0.068	0.016	0.002	0.004	0.002
OTU1698	3.657	5.971	0.0257505	0.316985	NotSig	Bacteria	Firmicutes	Clostridia	Clostridiales	Ruminococcaceae	Unassigned	0.003	0	0	0.002	0	0	0	0	0	0	0	0.03	0	0	0	0	0	0	0	0	0	0
OTU281	4.125	6.115	0.0260199	0.318061	NotSig	Bacteria	Proteobacteria	Gammaproteobacteria	Unassigned	Unassigned	Unassigned	0.004	0	0	0	0.043	0	0	0	0	0	0	0	0	0	0	0	0	0	0	0	0	0
OTU1074	2.009	8.542	0.0272791	0.330243	NotSig	Bacteria	Firmicutes	Clostridia	Clostridiales	Ruminococcaceae	Unassigned	0.056	0.014	0.273	0.005	0.157	0.005	0.025	0.013	0.034	0.018	0.027	0.004	0.016	0.063	0	0	0.027	0.002	0.005	0.01	0.004	0.007
OTU1631	-2.952	6.043	0.0273943	0.330243	NotSig	Bacteria	Firmicutes	Clostridia	Clostridiales	Ruminococcaceae	Unassigned	0	0.004	0	0	0	0.002	0	0	0	0	0	0	0	0.003	0	0	0.014	0.009	0.012	0	0	0
OTU1590	2.259	7.769	0.0281998	0.331067	NotSig	Bacteria	Firmicutes	Clostridia	Clostridiales	Clostridiaceae_1	Clostridium_sensu_stricto	0.027	0.006	0.014	0.027	0.043	0.016	0	0	0.09	0.012	0.01	0.06	0.011	0.006	0	0.003	0	0	0	0	0.018	0.018
OTU912	-3.915	6.043	0.0283451	0.331067	NotSig	Bacteria	Firmicutes	Unassigned	Unassigned	Unassigned	Unassigned	0	0.005	0	0	0	0	0	0	0	0	0	0	0	0.049	0	0	0	0	0	0	0	0
OTU341	3.417	5.902	0.0286262	0.331067	NotSig	Bacteria	Firmicutes	Erysipelotrichia	Erysipelotrichales	Erysipelotrichaceae	Erysipelothrix	0.003	0	0	0.012	0.016	0	0	0	0	0	0	0	0	0	0	0	0	0	0	0	0	0
OTU1299	3.387	5.897	0.0289442	0.331067	NotSig	Bacteria	Firmicutes	Clostridia	Clostridiales	Unassigned	Unassigned	0.003	0	0	0.01	0	0	0	0	0	0	0	0.018	0	0	0	0	0	0	0	0	0	0
OTU242	-2.44	5.87	0.029086	0.331067	NotSig	Bacteria	Unassigned	Unassigned	Unassigned	Unassigned	Unassigned	0	0.002	0	0	0	0	0	0	0	0.002	0	0	0.005	0.003	0	0	0.008	0	0.005	0.002	0	0
OTU234	2.697	5.75	0.0290884	0.331067	NotSig	Bacteria	Unassigned	Unassigned	Unassigned	Unassigned	Unassigned	0.002	0	0	0	0	0	0	0.01	0.002	0	0	0.004	0	0	0	0	0	0	0	0	0	0
OTU615	2.687	5.748	0.0292458	0.331067	NotSig	Bacteria	Bacteroidetes	Bacteroidia	Bacteroidales	Prevotellaceae	Prevotella	0.002	0	0.002	0	0	0	0	0	0	0	0.01	0.004	0	0	0	0	0	0	0	0	0	0
OTU1038	-1.903	8.115	0.0292875	0.331067	NotSig	Bacteria	Firmicutes	Clostridia	Clostridiales	Ruminococcaceae	Ruminococcus	0.01	0.037	0.007	0	0.002	0.007	0.014	0.028	0.008	0	0.015	0.016	0.041	0.012	0.063	0.003	0.077	0.052	0.073	0.002	0	0.048
OTU1446	-2.368	5.692	0.0293385	0.331067	NotSig	Bacteria	Firmicutes	Clostridia	Clostridiales	Ruminococcaceae	Unassigned	0	0.001	0	0	0	0	0	0	0	0	0	0	0	0.003	0	0.008	0	0.002	0	0	0	0
OTU69	2.629	5.738	0.0296338	0.331067	NotSig	Bacteria	Unassigned	Unassigned	Unassigned	Unassigned	Unassigned	0.002	0	0	0	0	0	0.005	0.003	0	0	0.007	0	0	0	0	0	0	0	0	0	0	0
OTU1586	-2.243	5.982	0.0299491	0.331067	NotSig	Bacteria	Firmicutes	Clostridia	Clostridiales	Lachnospiraceae	Unassigned	0	0.003	0	0	0	0	0	0	0	0.002	0.002	0	0	0.006	0	0.005	0.003	0.002	0.009	0	0.004	0
OTU339	3.386	5.896	0.030208	0.331067	NotSig	Bacteria	Unassigned	Unassigned	Unassigned	Unassigned	Unassigned	0.003	0	0	0.005	0	0	0	0	0	0	0	0.022	0	0	0	0	0	0	0	0	0	0
OTU822	1.562	7.294	0.0302614	0.331067	NotSig	Bacteria	Firmicutes	Clostridia	Clostridiales	Unassigned	Unassigned	0.017	0.005	0.005	0.007	0.004	0.016	0.022	0.005	0.024	0.016	0.037	0.028	0.005	0	0.003	0.003	0.008	0.009	0.002	0.008	0.004	0.009
OTU549	-2.973	5.796	0.030502	0.331067	NotSig	Bacteria	Bacteroidetes	Bacteroidia	Bacteroidales	Prevotellaceae	Prevotella	0	0.002	0	0	0	0	0	0	0	0	0	0	0.014	0	0.008	0	0	0	0	0	0	0
OTU154	3.679	6.817	0.0305335	0.331067	NotSig	Bacteria	Unassigned	Unassigned	Unassigned	Unassigned	Unassigned	0.013	0.001	0	0	0.002	0	0	0.132	0	0	0	0	0	0.003	0	0.003	0	0	0	0	0	0.002
OTU921	-3.024	5.806	0.0306384	0.331067	NotSig	Bacteria	Firmicutes	Clostridia	Clostridiales	Unassigned	Unassigned	0	0.002	0	0	0	0	0	0	0	0	0	0	0.016	0	0	0	0	0	0	0	0.004	0
OTU235	-2.96	5.794	0.0306824	0.331067	NotSig	Bacteria	Unassigned	Unassigned	Unassigned	Unassigned	Unassigned	0	0.002	0	0	0	0	0	0	0	0	0	0	0.005	0	0	0	0	0.016	0	0	0	0
OTU1414	2.118	7.728	0.0311969	0.33252	NotSig	Bacteria	Firmicutes	Clostridia	Clostridiales	Lachnospiraceae	Unassigned	0.03	0.006	0.012	0.174	0.004	0	0.032	0.015	0.009	0.002	0.047	0.002	0.003	0	0.034	0	0.008	0.005	0.002	0.002	0	0.009
OTU1085	2.276	5.687	0.0311976	0.33252	NotSig	Bacteria	Firmicutes	Clostridia	Clostridiales	Unassigned	Unassigned	0.001	0	0	0	0	0.005	0.002	0.003	0	0.002	0	0	0	0	0	0	0	0	0	0	0	0
OTU1173	-2.018	8.033	0.0316267	0.335052	NotSig	Bacteria	Firmicutes	Clostridia	Clostridiales	Lachnospiraceae	Unassigned	0.008	0.032	0.012	0	0.009	0	0.004	0.008	0.006	0	0.012	0.034	0.025	0.02	0.011	0	0.071	0.002	0.147	0.01	0.011	0.023
OTU1116	-3.901	7.067	0.0320006	0.33697	NotSig	Bacteria	Synergistetes	Synergistia	Synergistales	Synergistaceae	Pyramidobacter	0.001	0.02	0	0	0	0	0.002	0.005	0	0	0	0.002	0	0.205	0	0	0	0	0	0	0	0
OTU1450	2.588	5.73	0.0327998	0.343318	NotSig	Bacteria	Firmicutes	Clostridia	Clostridiales	Lachnospiraceae	Unassigned	0.002	0	0.012	0.002	0.002	0	0	0	0	0	0	0	0	0	0	0	0	0	0	0	0	0
OTU839	1.833	7.449	0.0337475	0.351135	NotSig	Bacteria	Firmicutes	Clostridia	Clostridiales	Unassigned	Unassigned	0.019	0.005	0.005	0.015	0.002	0.066	0.016	0	0.041	0.022	0.005	0.02	0.005	0	0.011	0	0.008	0.007	0	0.006	0.009	0.007
OTU582	1.704	12.279	0.0343823	0.355623	NotSig	Bacteria	Bacteroidetes	Bacteroidia	Bacteroidales	Porphyromonadaceae	Unassigned	0.695	0.227	0.17	0.392	0.04	4.452	0.097	0.72	0.111	0.343	0.305	0.318	0.298	0.061	0.67	0.233	0.093	0.255	0.019	0.329	0.248	0.064
OTU1127	3.002	6.266	0.0349652	0.357888	NotSig	Bacteria	Firmicutes	Clostridia	Clostridiales	Unassigned	Unassigned	0.006	0.001	0	0.002	0	0	0.047	0.008	0	0.002	0	0	0	0.003	0	0	0	0.002	0	0	0	0
OTU454	-2.242	9.931	0.0353311	0.357888	NotSig	Bacteria	Bacteroidetes	Bacteroidia	Bacteroidales	Bacteroidaceae	Bacteroides	0.036	0.171	0.033	0.08	0.004	0	0	0.028	0.023	0.181	0	0.008	0.063	1.158	0.024	0.28	0.019	0.002	0.002	0.148	0.009	0.002
OTU488	-2.642	7.042	0.035385	0.357888	NotSig	Bacteria	Bacteroidetes	Bacteroidia	Bacteroidales	Porphyromonadaceae	Unassigned	0.002	0.018	0.002	0.002	0	0.002	0.002	0.005	0.006	0	0	0.002	0.014	0.161	0.003	0	0.003	0	0	0	0	0
OTU1308	2.409	5.702	0.035885	0.357888	NotSig	Bacteria	Firmicutes	Clostridia	Clostridiales	Ruminococcaceae	Unassigned	0.001	0	0	0.005	0	0	0	0	0	0.002	0	0.006	0	0	0	0	0	0	0	0	0	0
OTU580	-2.78	5.76	0.0359487	0.357888	NotSig	Bacteria	Bacteroidetes	Bacteroidia	Bacteroidales	Prevotellaceae	Prevotella	0	0.002	0	0	0	0	0	0	0	0	0	0	0	0	0.003	0	0	0.016	0	0	0	0
OTU105	1.989	9.3	0.0359989	0.357888	NotSig	Bacteria	Spirochaetes	Spirochaetia	Spirochaetales	Spirochaetaceae	Treponema	0.085	0.023	0.017	0.015	0.027	0.557	0.007	0.066	0.019	0	0.015	0.123	0.044	0.026	0.024	0.065	0.005	0.014	0.005	0.046	0	0.002
OTU484	3.892	6.036	0.0360581	0.357888	NotSig	Bacteria	Bacteroidetes	Bacteroidia	Bacteroidales	Bacteroidaceae	Bacteroides	0.004	0	0	0	0.036	0	0	0	0	0	0	0	0	0	0	0	0	0	0	0	0	0
OTU1108	2.102	9.592	0.0363999	0.357888	NotSig	Bacteria	Firmicutes	Clostridia	Clostridiales	Ruminococcaceae	Ruminococcus	0.106	0.028	0.002	0.034	0.002	0.827	0.005	0.081	0.011	0.071	0.017	0.01	0.025	0.006	0	0.003	0.027	0.146	0.047	0.004	0.011	0.009
OTU1506	-2.677	6.11	0.036444	0.357888	NotSig	Bacteria	Firmicutes	Clostridia	Clostridiales	Ruminococcaceae	Unassigned	0	0.004	0	0	0.002	0	0	0	0	0.002	0	0	0	0.017	0	0.016	0	0	0	0.004	0.007	0
OTU496	-2.793	5.761	0.0366799	0.357901	NotSig	Bacteria	Bacteroidetes	Bacteroidia	Bacteroidales	Bacteroidaceae	Bacteroides	0	0.002	0	0	0	0	0	0	0	0	0	0	0	0.017	0	0	0	0	0	0	0.002	0
OTU1390	1.541	9.386	0.0368548	0.357901	NotSig	Bacteria	Firmicutes	Clostridia	Clostridiales	Lachnospiraceae	Unassigned	0.098	0.031	0.036	0.08	0.018	0.037	0.106	0.089	0.103	0.445	0.027	0.038	0.025	0.026	0.066	0.063	0.019	0.025	0	0.051	0.015	0.023
OTU518	2.448	5.709	0.037252	0.35976	NotSig	Bacteria	Bacteroidetes	Unassigned	Unassigned	Unassigned	Unassigned	0.001	0	0	0	0	0.002	0.002	0	0	0	0	0.008	0	0	0	0	0	0	0	0	0	0
OTU1514	-3.195	6.112	0.0375039	0.360202	NotSig	Bacteria	Firmicutes	Clostridia	Clostridiales	Lachnospiraceae	Unassigned	0	0.004	0	0	0.002	0	0	0	0	0	0	0	0	0	0	0.018	0	0	0	0.018	0.002	0
OTU412	3.038	8.393	0.0378894	0.360733	NotSig	Bacteria	Bacteroidetes	Bacteroidia	Bacteroidales	Bacteroidaceae	Bacteroides	0.05	0.007	0.002	0.068	0	0	0	0	0.105	0	0.002	0.326	0	0	0	0	0.011	0.05	0.002	0	0	0.002
OTU1329	-2.665	5.739	0.0379742	0.360733	NotSig	Bacteria	Unassigned	Unassigned	Unassigned	Unassigned	Unassigned	0	0.001	0	0	0	0	0	0	0	0	0	0	0	0	0	0.01	0	0	0	0.004	0	0
OTU1327	-3.655	5.963	0.0384267	0.360733	NotSig	Bacteria	Firmicutes	Clostridia	Clostridiales	Ruminococcaceae	Clostridium_IV	0	0.004	0	0	0	0	0	0	0	0	0	0	0	0.04	0	0	0	0	0	0	0	0
OTU1451	-1.619	9.522	0.038609	0.360733	NotSig	Bacteria	Firmicutes	Clostridia	Clostridiales	Unassigned	Unassigned	0.034	0.098	0.048	0.022	0.011	0	0.004	0.018	0.105	0.083	0.007	0.044	0.087	0.11	0.013	0.089	0.131	0.041	0.199	0.142	0.011	0.152
OTU1564	-2.624	5.732	0.0386517	0.360733	NotSig	Bacteria	Firmicutes	Clostridia	Clostridiales	Ruminococcaceae	Unassigned	0	0.001	0	0	0	0	0	0	0	0	0	0	0	0	0	0	0	0	0	0	0.004	0.009
OTU812	2.241	9.17	0.0387974	0.360733	NotSig	Bacteria	Firmicutes	Unassigned	Unassigned	Unassigned	Unassigned	0.08	0.021	0.005	0.012	0.009	0.016	0.075	0.018	0.531	0.004	0.084	0.048	0.003	0.182	0	0.008	0	0	0	0.004	0.011	0.005
OTU1494	-3.129	6.468	0.0399275	0.3646	NotSig	Bacteria	Firmicutes	Clostridia	Clostridiales	Lachnospiraceae	Unassigned	0.001	0.007	0	0.005	0	0	0	0	0	0	0.002	0	0	0.014	0	0.037	0	0	0	0.024	0	0
OTU128	-1.838	8.121	0.0399747	0.3646	NotSig	Bacteria	Unassigned	Unassigned	Unassigned	Unassigned	Unassigned	0.01	0.037	0.007	0.015	0.002	0	0.025	0.003	0.036	0.008	0	0.004	0.098	0.032	0.008	0.141	0.027	0.007	0.007	0.032	0.02	0
OTU1722	3.104	5.827	0.0400476	0.3646	NotSig	Bacteria	Firmicutes	Clostridia	Clostridiales	Unassigned	Unassigned	0.002	0	0	0.002	0.018	0	0	0	0	0	0	0	0	0	0	0	0	0	0	0	0	0
OTU1725	3.104	5.827	0.0400476	0.3646	NotSig	Bacteria	Firmicutes	Clostridia	Clostridiales	Clostridiales_Incertae_Sedis_XI	Unassigned	0.002	0	0	0.002	0.018	0	0	0	0	0	0	0	0	0	0	0	0	0	0	0	0	0
OTU1008	3.805	6.008	0.0404924	0.364849	NotSig	Bacteria	Firmicutes	Clostridia	Clostridiales	Lachnospiraceae	Cellulosilyticum	0.003	0	0	0	0.034	0	0	0	0	0	0	0	0	0	0	0	0	0	0	0	0	0
OTU485	3.805	6.008	0.0404924	0.364849	NotSig	Bacteria	Bacteroidetes	Bacteroidia	Bacteroidales	Prevotellaceae	Prevotella	0.003	0	0	0	0.034	0	0	0	0	0	0	0	0	0	0	0	0	0	0	0	0	0
OTU14	1.567	12.331	0.0409091	0.366714	NotSig	Bacteria	Spirochaetes	Spirochaetia	Spirochaetales	Spirochaetaceae	Treponema	0.703	0.274	0.325	0.194	0.27	4.412	0.147	0.436	0.188	0.457	0.344	0.255	0.461	0.648	0.269	0.102	0.049	0.448	0.037	0.081	0.091	0.549
OTU262	2.902	5.787	0.0415892	0.369365	NotSig	Bacteria	Firmicutes	Bacilli	Lactobacillales	Aerococcaceae	Globicatella	0.002	0	0	0.007	0.011	0	0	0	0	0	0	0	0	0	0	0	0	0	0	0	0	0
OTU85	2.926	5.791	0.0419649	0.369365	NotSig	Bacteria	Proteobacteria	Gammaproteobacteria	Pseudomonadales	Pseudomonadaceae	Unassigned	0.002	0	0	0.005	0.013	0	0	0	0	0	0	0	0	0	0	0	0	0	0	0	0	0
OTU981	-2.56	5.722	0.0419728	0.369365	NotSig	Bacteria	Unassigned	Unassigned	Unassigned	Unassigned	Unassigned	0	0.002	0	0	0	0	0	0	0	0	0	0	0	0.014	0	0	0	0.002	0	0	0	0
OTU524	-2.397	6.695	0.0422114	0.369365	NotSig	Bacteria	Bacteroidetes	Bacteroidia	Bacteroidales	Unassigned	Unassigned	0.002	0.01	0.002	0	0.002	0	0.004	0	0.006	0	0	0.002	0.06	0.009	0	0.005	0	0	0	0.002	0.024	0
OTU1051	-2.258	5.68	0.0436467	0.369365	NotSig	Bacteria	Firmicutes	Clostridia	Clostridiales	Unassigned	Unassigned	0	0.001	0	0	0	0	0	0	0	0	0	0	0	0	0	0	0	0	0.002	0.006	0	0
OTU712	1.601	9.854	0.0438948	0.369365	NotSig	Bacteria	Firmicutes	Clostridia	Clostridiales	Ruminococcaceae	Unassigned	0.135	0.046	0.053	0.111	0.072	0	0.186	0.041	0.122	0.213	0.287	0.27	0.096	0.15	0.055	0.078	0.011	0.005	0.005	0.042	0.004	0.016
OTU1483	2.081	6.372	0.044163	0.369365	NotSig	Bacteria	Firmicutes	Clostridia	Clostridiales	Unassigned	Unassigned	0.007	0.001	0.014	0.022	0.007	0.007	0.002	0.008	0	0	0.002	0.004	0	0.012	0	0	0	0	0	0	0.002	0
OTU785	2.917	5.789	0.0442433	0.369365	NotSig	Bacteria	Actinobacteria	Actinobacteria	Coriobacteriales	Coriobacteriaceae	Unassigned	0.002	0	0	0	0	0	0	0	0	0	0.017	0.002	0	0	0	0	0	0	0	0	0	0
OTU353	-2.433	5.703	0.0444167	0.369365	NotSig	Bacteria	Firmicutes	Unassigned	Unassigned	Unassigned	Unassigned	0	0.001	0	0	0	0	0	0	0	0	0	0	0	0	0	0	0	0	0.005	0	0	0.007
OTU837	-2.854	7.047	0.0447207	0.369365	NotSig	Bacteria	Firmicutes	Clostridia	Clostridiales	Ruminococcaceae	Unassigned	0.002	0.014	0	0.017	0	0	0	0.003	0	0.002	0	0	0	0	0.003	0	0	0	0.002	0.002	0.038	0.098
OTU713	1.551	10.335	0.0449877	0.369365	NotSig	Bacteria	Firmicutes	Unassigned	Unassigned	Unassigned	Unassigned	0.174	0.058	0.024	0.056	0.011	0.063	0.079	0.099	0.976	0.138	0.084	0.207	0.033	0.026	0.021	0.092	0.036	0.011	0.077	0.091	0.066	0.125
OTU1596	-2.395	5.697	0.0451583	0.369365	NotSig	Bacteria	Proteobacteria	Unassigned	Unassigned	Unassigned	Unassigned	0	0.001	0	0	0	0	0	0	0	0	0	0	0.005	0.009	0	0	0	0	0	0	0	0
OTU1546	-2.227	5.675	0.0451782	0.369365	NotSig	Bacteria	Firmicutes	Clostridia	Clostridiales	Ruminococcaceae	Unassigned	0	0.001	0	0	0	0	0	0	0	0	0	0	0	0	0	0.003	0.003	0	0.005	0	0	0
OTU428	-1.635	8.636	0.045991	0.369365	NotSig	Bacteria	Bacteroidetes	Bacteroidia	Bacteroidales	Prevotellaceae	Unassigned	0.018	0.053	0.005	0.085	0.022	0	0.004	0.015	0.004	0.028	0.02	0.002	0.055	0.012	0.024	0.018	0.246	0.023	0.063	0.01	0.022	0.054
OTU1258	-2.518	8.932	0.0460263	0.369365	NotSig	Bacteria	Firmicutes	Clostridia	Clostridiales	Unassigned	Unassigned	0.013	0.065	0	0.01	0	0	0.038	0	0.036	0.002	0.002	0.038	0	0	0.063	0.225	0	0	0.002	0.253	0.104	0.002
OTU133	2.804	6.569	0.0469315	0.369365	NotSig	Bacteria	Firmicutes	Negativicutes	Selenomonadales	Acidaminococcaceae	Acidaminococcus	0.008	0.001	0	0.002	0	0.056	0	0.013	0	0	0.01	0	0.003	0	0	0	0	0	0	0	0.004	0.002
OTU1338	-2.187	5.669	0.047192	0.369365	NotSig	Bacteria	Unassigned	Unassigned	Unassigned	Unassigned	Unassigned	0	0.001	0	0	0	0	0	0	0	0	0	0	0.005	0	0	0.003	0	0	0	0.002	0	0
OTU1644	-2.606	6.645	0.0474676	0.369365	NotSig	Bacteria	Firmicutes	Clostridia	Clostridiales	Lachnospiraceae	Unassigned	0.001	0.009	0	0	0	0	0	0.005	0.002	0	0.002	0.004	0	0	0.003	0	0.014	0	0.049	0	0	0.02
OTU1587	-2.176	5.668	0.0477508	0.369365	NotSig	Bacteria	Firmicutes	Clostridia	Clostridiales	Lachnospiraceae	Unassigned	0	0.001	0	0	0	0	0	0	0	0	0	0	0	0	0	0.008	0	0	0	0.002	0	0
OTU1170	2.652	5.741	0.0479126	0.369365	NotSig	Bacteria	Firmicutes	Unassigned	Unassigned	Unassigned	Unassigned	0.001	0	0	0	0.009	0	0.005	0	0	0	0	0	0	0	0	0	0	0	0	0	0	0
OTU283	-2.171	5.667	0.0480168	0.369365	NotSig	Bacteria	Unassigned	Unassigned	Unassigned	Unassigned	Unassigned	0	0.001	0	0	0	0	0	0	0	0	0	0	0.011	0	0	0	0	0	0	0	0	0
OTU1715	2.672	5.745	0.0481972	0.369365	NotSig	Bacteria	Firmicutes	Clostridia	Clostridiales	Clostridiales_Incertae_Sedis_XI	Helcococcus	0.002	0	0	0.012	0.004	0	0	0	0	0	0	0	0	0	0	0	0	0	0	0	0	0
OTU542	3.613	5.952	0.0482928	0.369365	NotSig	Bacteria	Bacteroidetes	Flavobacteriia	Flavobacteriales	Flavobacteriaceae	Cloacibacterium	0.003	0	0	0	0.029	0	0	0	0	0	0	0	0	0	0	0	0	0	0	0	0	0
OTU971	-2.166	5.666	0.0483118	0.369365	NotSig	Bacteria	Firmicutes	Unassigned	Unassigned	Unassigned	Unassigned	0	0.001	0	0	0	0	0	0	0	0	0	0	0	0.006	0	0.003	0	0	0.002	0	0	0
OTU1498	3.369	6.479	0.0487097	0.369365	NotSig	Bacteria	Firmicutes	Clostridia	Clostridiales	Lachnospiraceae	Unassigned	0.008	0	0	0	0	0	0.075	0	0	0	0	0.006	0	0	0	0.003	0	0	0	0.002	0	0
OTU398	2.149	6.432	0.0487825	0.369365	NotSig	Bacteria	Bacteroidetes	Unassigned	Unassigned	Unassigned	Unassigned	0.006	0.001	0.01	0	0.013	0.026	0.007	0	0.004	0.002	0.002	0	0	0.003	0	0	0	0	0	0.002	0.007	0
OTU555	-2.154	5.664	0.0489168	0.369365	NotSig	Bacteria	Bacteroidetes	Bacteroidia	Bacteroidales	Prevotellaceae	Prevotella	0	0.001	0	0	0	0	0	0	0	0	0	0	0.005	0.003	0	0.003	0	0	0	0	0	0
OTU1573	-3.339	5.879	0.0491332	0.369365	NotSig	Bacteria	Firmicutes	Clostridia	Clostridiales	Ruminococcaceae	Clostridium_IV	0	0.003	0	0	0	0	0	0	0	0	0	0	0	0.032	0	0	0	0	0	0	0	0
OTU1553	-2.281	5.68	0.0500863	0.369365	NotSig	Bacteria	Firmicutes	Clostridia	Clostridiales	Lachnospiraceae	Unassigned	0	0.001	0	0	0	0	0	0	0	0	0	0	0	0	0	0	0.003	0.009	0	0	0	0
OTU345	-2.281	5.68	0.0500863	0.369365	NotSig	Bacteria	Unassigned	Unassigned	Unassigned	Unassigned	Unassigned	0	0.001	0	0	0	0	0	0	0	0	0	0	0	0	0	0	0.003	0.009	0	0	0	0
OTU882	2.328	6.384	0.0502742	0.369365	NotSig	Bacteria	Firmicutes	Clostridia	Clostridiales	Unassigned	Unassigned	0.007	0.001	0.002	0.002	0.004	0	0.039	0.01	0.002	0	0.002	0.002	0	0	0	0	0	0	0	0	0.009	0
OTU342	2.634	5.739	0.050311	0.369365	NotSig	Bacteria	Firmicutes	Negativicutes	Selenomonadales	Veillonellaceae	Schwartzia	0.002	0	0	0	0	0	0.013	0	0	0	0.002	0	0	0	0	0	0	0	0	0	0	0
OTU661	-2.129	5.661	0.0503294	0.369365	NotSig	Bacteria	Bacteroidetes	Bacteroidia	Bacteroidales	Unassigned	Unassigned	0	0.001	0	0	0	0	0	0	0	0	0	0	0.003	0	0	0	0.003	0.002	0	0	0	0.002
OTU268	-2.568	5.909	0.0503814	0.369365	NotSig	Bacteria	Proteobacteria	Gammaproteobacteria	Pasteurellales	Pasteurellaceae	Actinobacillus	0	0.003	0	0	0	0	0	0	0	0	0	0.002	0.003	0.023	0.003	0	0.003	0	0	0	0	0
OTU525	-2.124	5.66	0.050514	0.369365	NotSig	Bacteria	Bacteroidetes	Bacteroidia	Bacteroidales	Bacteroidaceae	Bacteroides	0	0.001	0	0	0	0	0	0	0	0	0	0	0	0.012	0	0	0	0	0	0	0	0
OTU211	-2.121	5.66	0.0506565	0.369365	NotSig	Bacteria	Unassigned	Unassigned	Unassigned	Unassigned	Unassigned	0	0.001	0	0	0	0	0	0	0	0	0	0	0	0.009	0	0	0	0	0	0	0	0.002
OTU469	-2.499	7.042	0.0507089	0.369365	NotSig	Bacteria	Bacteroidetes	Bacteroidia	Bacteroidales	Bacteroidaceae	Bacteroides	0.002	0.018	0	0.007	0.007	0	0.002	0	0.004	0	0	0.004	0.003	0.158	0.003	0.005	0	0	0	0	0.007	0
OTU1322	-2.253	5.676	0.0507405	0.369365	NotSig	Bacteria	Firmicutes	Clostridia	Clostridiales	Eubacteriaceae	Eubacterium	0	0.001	0	0	0	0	0	0	0	0	0	0	0	0	0	0	0	0.009	0	0	0	0.002
OTU1000	-2.116	5.659	0.0509426	0.369365	NotSig	Bacteria	Firmicutes	Clostridia	Clostridiales	Unassigned	Unassigned	0	0.001	0	0	0	0	0	0	0	0	0	0	0	0.003	0	0	0	0	0	0	0	0.007
OTU1624	-2.115	5.659	0.0510061	0.369365	NotSig	Bacteria	Firmicutes	Clostridia	Clostridiales	Lachnospiraceae	Unassigned	0	0.001	0	0	0	0	0	0	0	0	0	0	0	0	0.011	0	0	0	0	0	0	0
OTU999	-2.115	5.659	0.0510061	0.369365	NotSig	Bacteria	Firmicutes	Unassigned	Unassigned	Unassigned	Unassigned	0	0.001	0	0	0	0	0	0	0	0	0	0	0	0	0.011	0	0	0	0	0	0	0
OTU570	-1.947	6.815	0.0510438	0.369365	NotSig	Bacteria	Bacteroidetes	Bacteroidia	Bacteroidales	Prevotellaceae	Prevotella	0.003	0.011	0.002	0.002	0.002	0.005	0.005	0.003	0.006	0	0	0	0	0	0.04	0.034	0.005	0.009	0	0.018	0	0.002
OTU286	-2.113	5.659	0.0510861	0.369365	NotSig	Bacteria	Firmicutes	Unassigned	Unassigned	Unassigned	Unassigned	0	0.001	0	0	0	0	0	0	0	0	0	0	0	0	0	0	0	0	0	0	0	0.009
OTU1369	-2.17	11.139	0.0511457	0.369365	NotSig	Bacteria	Firmicutes	Clostridia	Clostridiales	Lachnospiraceae	Unassigned	0.089	0.342	0.318	0.034	0.022	0	0.005	0.284	0.008	0.039	0.097	0.078	0.071	0.029	0.008	0	2.116	0.016	1.116	0.002	0	0.059
OTU350	2.645	5.74	0.0511619	0.369365	NotSig	Bacteria	Firmicutes	Erysipelotrichia	Erysipelotrichales	Erysipelotrichaceae	Erysipelothrix	0.002	0	0	0.015	0.002	0	0	0	0	0	0	0	0	0	0	0	0	0	0	0	0	0
OTU520	-3.288	5.864	0.0514025	0.369365	NotSig	Bacteria	Bacteroidetes	Bacteroidia	Bacteroidales	Porphyromonadaceae	Unassigned	0	0.003	0	0	0	0	0	0	0	0	0	0	0.027	0	0	0	0	0	0	0	0	0
OTU1189	1.543	7.172	0.0518851	0.369365	NotSig	Bacteria	Firmicutes	Clostridia	Clostridiales	Ruminococcaceae	Unassigned	0.015	0.005	0.019	0.005	0.002	0.019	0.041	0.01	0.013	0.016	0.015	0.01	0	0.003	0.011	0.005	0	0.005	0	0	0.013	0.011
OTU827	-2.103	8.733	0.0520963	0.369365	NotSig	Bacteria	Firmicutes	Clostridia	Clostridiales	Unassigned	Unassigned	0.014	0.055	0.012	0.015	0.004	0.005	0.004	0	0.026	0.008	0	0.066	0	0.037	0	0.01	0.161	0	0.311	0.014	0.018	0.002
OTU873	1.707	6.23	0.0521017	0.369365	NotSig	Bacteria	Firmicutes	Clostridia	Clostridiales	Ruminococcaceae	Unassigned	0.005	0.001	0.002	0.01	0.002	0.002	0	0.008	0.004	0.012	0.002	0.006	0	0.009	0.003	0.003	0	0	0	0	0	0
OTU219	3.479	5.921	0.0523679	0.369365	NotSig	Bacteria	Unassigned	Unassigned	Unassigned	Unassigned	Unassigned	0.003	0	0	0	0	0	0	0	0	0	0	0.028	0	0	0	0	0	0	0	0	0	0
OTU1582	3.507	5.923	0.0523934	0.369365	NotSig	Bacteria	Proteobacteria	Epsilonproteobacteria	Campylobacterales	Campylobacteraceae	Arcobacter	0.003	0	0	0	0.027	0	0	0	0	0	0	0	0	0	0	0	0	0	0	0	0	0
OTU541	3.507	5.923	0.0523934	0.369365	NotSig	Bacteria	Bacteroidetes	Bacteroidia	Bacteroidales	Porphyromonadaceae	Unassigned	0.003	0	0	0	0.027	0	0	0	0	0	0	0	0	0	0	0	0	0	0	0	0	0
OTU1185	-1.425	9.497	0.0526208	0.369365	NotSig	Bacteria	Firmicutes	Clostridia	Clostridiales	Lachnospiraceae	Unassigned	0.038	0.098	0.029	0.104	0.038	0.009	0.013	0.015	0.036	0.055	0.064	0.02	0.03	0.061	0.145	0.013	0.085	0.047	0.077	0.014	0.029	0.481
OTU516	2.524	5.721	0.052809	0.369365	NotSig	Bacteria	Bacteroidetes	Bacteroidia	Bacteroidales	Bacteroidaceae	Bacteroides	0.001	0	0	0.007	0.007	0	0	0	0	0	0	0	0	0	0	0	0	0	0	0	0	0
OTU645	-2.307	7.294	0.0528268	0.369365	NotSig	Bacteria	Bacteroidetes	Bacteroidia	Bacteroidales	Prevotellaceae	Unassigned	0.004	0.019	0.007	0	0.018	0	0.004	0	0	0	0.002	0.004	0.106	0.006	0	0.026	0	0	0	0.004	0.002	0.05
OTU1312	-2.291	5.998	0.0530824	0.369674	NotSig	Bacteria	Firmicutes	Clostridia	Clostridiales	Ruminococcaceae	Unassigned	0	0.003	0	0	0	0	0	0	0.002	0	0	0.002	0	0.003	0	0	0.008	0	0.014	0.002	0	0.002
OTU1537	-3.216	5.849	0.0537533	0.371798	NotSig	Bacteria	Proteobacteria	Alphaproteobacteria	Unassigned	Unassigned	Unassigned	0	0.003	0	0	0	0	0	0	0	0	0	0	0	0.029	0	0	0	0	0	0	0	0
OTU1045	-2.398	7.977	0.0542927	0.371798	NotSig	Bacteria	Firmicutes	Clostridia	Clostridiales	Ruminococcaceae	Unassigned	0.006	0.034	0.01	0.002	0.016	0	0	0	0	0.002	0.015	0.02	0.096	0	0	0.005	0.128	0	0.098	0.008	0	0
OTU1030	2.471	5.712	0.0547872	0.371798	NotSig	Bacteria	Firmicutes	Unassigned	Unassigned	Unassigned	Unassigned	0.001	0	0	0	0	0	0.004	0.01	0	0	0	0	0	0	0	0	0	0	0	0	0	0
OTU158	3.17	6.794	0.0549585	0.371798	NotSig	Bacteria	Unassigned	Unassigned	Unassigned	Unassigned	Unassigned	0.012	0.001	0	0.007	0	0	0	0	0.004	0	0	0.105	0	0	0	0.003	0	0	0	0.006	0	0
OTU98	-2.916	7.016	0.0555985	0.371798	NotSig	Bacteria	Spirochaetes	Spirochaetia	Spirochaetales	Spirochaetaceae	Treponema	0.002	0.013	0	0	0.004	0	0	0	0	0.014	0	0	0	0	0	0.034	0	0.002	0	0.024	0.069	0
OTU934	3.354	5.893	0.056468	0.371798	NotSig	Bacteria	Firmicutes	Clostridia	Clostridiales	Ruminococcaceae	Unassigned	0.003	0	0	0	0	0	0.027	0	0	0	0	0	0	0	0	0	0	0	0	0	0	0
OTU1704	3.392	5.893	0.0570608	0.371798	NotSig	Bacteria	Firmicutes	Clostridia	Clostridiales	Unassigned	Unassigned	0.002	0	0	0	0.025	0	0	0	0	0	0	0	0	0	0	0	0	0	0	0	0	0
OTU193	3.392	5.893	0.0570608	0.371798	NotSig	Bacteria	Firmicutes	Bacilli	Lactobacillales	Unassigned	Unassigned	0.002	0	0	0	0.025	0	0	0	0	0	0	0	0	0	0	0	0	0	0	0	0	0
OTU317	3.392	5.893	0.0570608	0.371798	NotSig	Bacteria	Proteobacteria	Betaproteobacteria	Burkholderiales	Comamonadaceae	Unassigned	0.002	0	0	0	0.025	0	0	0	0	0	0	0	0	0	0	0	0	0	0	0	0	0
OTU1353	2.456	5.71	0.0575628	0.371798	NotSig	Bacteria	Unassigned	Unassigned	Unassigned	Unassigned	Unassigned	0.001	0	0	0.002	0	0	0	0	0.009	0	0	0	0	0	0	0	0	0	0	0	0	0
OTU662	-3.082	5.819	0.0580908	0.371798	NotSig	Bacteria	Bacteroidetes	Bacteroidia	Bacteroidales	Porphyromonadaceae	Butyricimonas	0	0.003	0	0	0	0	0	0	0	0	0	0	0	0.026	0	0	0	0	0	0	0	0
OTU805	1.684	10.672	0.0582678	0.371798	NotSig	Bacteria	Firmicutes	Clostridia	Clostridiales	Unassigned	Unassigned	0.233	0.082	0.218	0.153	0.27	0.878	0.344	0.043	0.021	0.061	0.312	0.034	0.005	0.352	0	0.016	0.011	0.324	0.019	0.02	0.073	0.002
OTU121	1.872	8.424	0.058296	0.371798	NotSig	Bacteria	Firmicutes	Bacilli	Bacillales	Staphylococcaceae	Staphylococcus	0.048	0.013	0.017	0.029	0	0	0.152	0.028	0.009	0.032	0.126	0.091	0.014	0	0.013	0.008	0.003	0.02	0.002	0	0	0.068
OTU157	-2.641	6.523	0.0585089	0.371798	NotSig	Bacteria	Unassigned	Unassigned	Unassigned	Unassigned	Unassigned	0.001	0.009	0	0	0	0	0.004	0.008	0	0	0	0	0.005	0	0.003	0	0	0.077	0.002	0	0	0.002
OTU191	2.488	6.098	0.0585145	0.371798	NotSig	Bacteria	Unassigned	Unassigned	Unassigned	Unassigned	Unassigned	0.004	0	0	0.017	0.004	0	0	0	0.002	0.002	0	0.016	0	0	0	0	0	0	0	0	0	0.005
OTU688	-2.172	5.808	0.0593571	0.371798	NotSig	Bacteria	Bacteroidetes	Bacteroidia	Bacteroidales	Porphyromonadaceae	Unassigned	0	0.002	0	0	0	0	0.002	0	0	0	0	0	0.003	0	0	0	0	0.007	0	0	0.004	0.005
OTU1297	2.87	6.004	0.0594523	0.371798	NotSig	Bacteria	Firmicutes	Clostridia	Clostridiales	Unassigned	Unassigned	0.003	0	0	0.005	0	0	0.007	0	0	0	0	0.022	0	0	0	0	0	0.002	0	0	0	0
OTU391	-1.491	11.136	0.0602854	0.371798	NotSig	Bacteria	Bacteroidetes	Bacteroidia	Bacteroidales	Bacteroidaceae	Bacteroides	0.12	0.354	0.122	0.194	0.133	0.028	0.02	0.066	0.177	0.309	0.007	0.141	0.199	1.879	0.298	0.552	0.063	0.005	0.014	0.23	0.148	0.152
OTU848	1.863	7.037	0.0604896	0.371798	NotSig	Bacteria	Unassigned	Unassigned	Unassigned	Unassigned	Unassigned	0.014	0.004	0.01	0.019	0.004	0	0.036	0.01	0	0.037	0.005	0.022	0.008	0	0	0	0.003	0.009	0	0	0	0.016
OTU968	1.952	5.82	0.0605513	0.371798	NotSig	Bacteria	Firmicutes	Clostridia	Clostridiales	Unassigned	Unassigned	0.002	0	0.002	0.002	0.004	0.002	0	0	0.002	0	0.005	0	0	0	0	0	0	0	0	0	0.002	0
OTU1505	1.891	5.794	0.0605517	0.371798	NotSig	Bacteria	Firmicutes	Clostridia	Clostridiales	Lachnospiraceae	Unassigned	0.002	0	0	0	0	0	0.002	0.003	0.002	0.004	0.005	0.002	0	0	0	0	0	0	0	0	0	0.002
OTU705	2.296	6.691	0.0607136	0.371798	NotSig	Bacteria	Actinobacteria	Actinobacteria	Actinomycetales	Corynebacteriaceae	Corynebacterium	0.01	0.002	0	0.01	0.025	0	0.05	0	0	0.008	0.005	0	0.011	0	0.003	0	0.003	0	0	0	0	0.002
OTU855	1.38	6.55	0.0610479	0.371798	NotSig	Bacteria	Firmicutes	Clostridia	Clostridiales	Unassigned	Unassigned	0.007	0.003	0.005	0.005	0.002	0.007	0.007	0.013	0.011	0.012	0.005	0.004	0.003	0.009	0	0.005	0.003	0	0.002	0	0.004	0
OTU372	3.336	10.556	0.0610692	0.371798	NotSig	Bacteria	Bacteroidetes	Bacteroidia	Bacteroidales	Bacteroidaceae	Bacteroides	0.23	0.029	0.01	0	0.004	2.223	0	0.051	0	0	0.012	0	0	0.014	0	0	0	0.279	0	0	0	0
OTU1603	-2.284	6.569	0.0613898	0.371798	NotSig	Bacteria	Firmicutes	Clostridia	Clostridiales	Lachnospiraceae	Unassigned	0.001	0.008	0	0	0	0	0.004	0.003	0.002	0	0.005	0.002	0	0	0.003	0	0.019	0	0.033	0	0	0.023
OTU540	2.324	5.691	0.0615655	0.371798	NotSig	Bacteria	Bacteroidetes	Bacteroidia	Bacteroidales	Porphyromonadaceae	Unassigned	0.001	0	0	0.005	0.007	0	0	0	0	0	0	0	0	0	0	0	0	0	0	0	0	0
OTU1634	-2.969	5.792	0.0619729	0.371798	NotSig	Bacteria	Firmicutes	Clostridia	Clostridiales	Lachnospiraceae	Unassigned	0	0.002	0	0	0	0	0	0	0	0	0	0	0	0	0	0	0	0	0.016	0	0	0
OTU1303	-1.341	8.592	0.0620567	0.371798	NotSig	Bacteria	Firmicutes	Clostridia	Clostridiales	Lachnospiraceae	Unassigned	0.02	0.048	0.026	0.019	0.007	0.012	0.038	0.015	0.006	0.028	0.032	0.018	0.052	0.006	0.04	0.008	0.071	0.11	0.124	0.004	0.018	0.048
OTU1534	3.268	5.862	0.0624175	0.371798	NotSig	Bacteria	Firmicutes	Clostridia	Clostridiales	Clostridiaceae_1	Proteiniclasticum	0.002	0	0	0	0.022	0	0	0	0	0	0	0	0	0	0	0	0	0	0	0	0	0
OTU1714	3.268	5.862	0.0624175	0.371798	NotSig	Bacteria	Firmicutes	Clostridia	Clostridiales	Unassigned	Unassigned	0.002	0	0	0	0.022	0	0	0	0	0	0	0	0	0	0	0	0	0	0	0	0	0
OTU492	3.268	5.862	0.0624175	0.371798	NotSig	Bacteria	Bacteroidetes	Flavobacteriia	Flavobacteriales	Flavobacteriaceae	Flavobacterium	0.002	0	0	0	0.022	0	0	0	0	0	0	0	0	0	0	0	0	0	0	0	0	0
OTU502	3.268	5.862	0.0624175	0.371798	NotSig	Bacteria	Bacteroidetes	Flavobacteriia	Flavobacteriales	Flavobacteriaceae	Chryseobacterium	0.002	0	0	0	0.022	0	0	0	0	0	0	0	0	0	0	0	0	0	0	0	0	0
OTU1198	2.117	5.666	0.0625284	0.371798	NotSig	Bacteria	Candidatus_Saccharibacteria	Unassigned	Unassigned	Unassigned	Saccharibacteria_genera_incertae_sedis	0.001	0	0	0	0.009	0	0	0	0	0	0	0	0	0	0	0	0	0	0	0	0	0
OTU1240	2.117	5.666	0.0625284	0.371798	NotSig	Bacteria	Candidatus_Saccharibacteria	Unassigned	Unassigned	Unassigned	Saccharibacteria_genera_incertae_sedis	0.001	0	0	0	0.009	0	0	0	0	0	0	0	0	0	0	0	0	0	0	0	0	0
OTU1721	2.117	5.666	0.0625284	0.371798	NotSig	Bacteria	Firmicutes	Clostridia	Clostridiales	Clostridiales_Incertae_Sedis_XI	Tissierella	0.001	0	0	0	0.009	0	0	0	0	0	0	0	0	0	0	0	0	0	0	0	0	0
OTU279	2.117	5.666	0.0625284	0.371798	NotSig	Bacteria	Proteobacteria	Betaproteobacteria	Burkholderiales	Comamonadaceae	Unassigned	0.001	0	0	0	0.009	0	0	0	0	0	0	0	0	0	0	0	0	0	0	0	0	0
OTU282	2.117	5.666	0.0625284	0.371798	NotSig	Bacteria	Firmicutes	Negativicutes	Selenomonadales	Veillonellaceae	Veillonella	0.001	0	0	0	0.009	0	0	0	0	0	0	0	0	0	0	0	0	0	0	0	0	0
OTU321	2.117	5.666	0.0625284	0.371798	NotSig	Bacteria	Proteobacteria	Betaproteobacteria	Burkholderiales	Comamonadaceae	Brachymonas	0.001	0	0	0	0.009	0	0	0	0	0	0	0	0	0	0	0	0	0	0	0	0	0
OTU501	2.117	5.666	0.0625284	0.371798	NotSig	Bacteria	Bacteroidetes	Bacteroidia	Bacteroidales	Porphyromonadaceae	Unassigned	0.001	0	0	0	0.009	0	0	0	0	0	0	0	0	0	0	0	0	0	0	0	0	0
OTU618	2.117	5.666	0.0625284	0.371798	NotSig	Bacteria	Bacteroidetes	Flavobacteriia	Flavobacteriales	Flavobacteriaceae	Chryseobacterium	0.001	0	0	0	0.009	0	0	0	0	0	0	0	0	0	0	0	0	0	0	0	0	0
OTU975	2.117	5.666	0.0625284	0.371798	NotSig	Bacteria	Firmicutes	Clostridia	Clostridiales	Eubacteriaceae	Eubacterium	0.001	0	0	0	0.009	0	0	0	0	0	0	0	0	0	0	0	0	0	0	0	0	0
OTU693	3.206	6.135	0.0625319	0.371798	NotSig	Bacteria	Bacteroidetes	Bacteroidia	Bacteroidales	Porphyromonadaceae	Unassigned	0.005	0	0	0.024	0	0	0	0	0	0.028	0	0	0	0	0.003	0	0	0	0	0	0	0
OTU351	2.118	5.666	0.0625335	0.371798	NotSig	Bacteria	Unassigned	Unassigned	Unassigned	Unassigned	Unassigned	0.001	0	0	0	0	0.005	0	0	0.002	0	0.002	0	0	0	0	0	0	0	0	0	0	0
OTU535	-1.97	5.897	0.0628242	0.37226	NotSig	Bacteria	Bacteroidetes	Bacteroidia	Bacteroidales	Prevotellaceae	Prevotella	0	0.002	0.002	0	0	0	0	0	0	0.002	0	0	0.008	0.003	0.003	0	0	0.007	0	0.004	0	0
OTU959	2.263	5.681	0.0633799	0.373868	NotSig	Bacteria	Firmicutes	Clostridia	Clostridiales	Unassigned	Unassigned	0.001	0	0	0	0	0	0.009	0	0	0.002	0	0	0	0	0	0	0	0	0	0	0	0
OTU371	-1.314	12.656	0.0635234	0.373868	NotSig	Bacteria	Bacteroidetes	Bacteroidia	Bacteroidales	Prevotellaceae	Prevotella	0.387	0.977	0.43	0.269	0.247	0.087	0.185	0.695	0.049	0.483	1.133	0.292	3.399	0.562	2.216	0.222	0.976	1.327	0.126	0.182	0.228	0.528
OTU631	-1.785	7.068	0.0644497	0.374256	NotSig	Bacteria	Bacteroidetes	Bacteroidia	Bacteroidales	Unassigned	Unassigned	0.004	0.014	0.01	0.007	0.002	0	0	0.003	0	0.004	0.01	0.006	0.025	0	0	0.01	0.003	0.074	0.002	0.016	0	0.011
OTU506	-2.634	6.126	0.0646911	0.374256	NotSig	Bacteria	Bacteroidetes	Bacteroidia	Bacteroidales	Prevotellaceae	Prevotella	0.001	0.005	0	0	0	0	0	0.003	0	0	0.002	0	0.022	0	0.008	0	0	0.018	0	0	0	0
OTU1248	2.084	5.661	0.0647595	0.374256	NotSig	Bacteria	Candidatus_Saccharibacteria	Unassigned	Unassigned	Unassigned	Saccharibacteria_genera_incertae_sedis	0.001	0	0	0.002	0.007	0	0	0	0	0	0	0	0	0	0	0	0	0	0	0	0	0
OTU263	2.084	5.661	0.0647595	0.374256	NotSig	Bacteria	Firmicutes	Bacilli	Lactobacillales	Unassigned	Unassigned	0.001	0	0	0.002	0.007	0	0	0	0	0	0	0	0	0	0	0	0	0	0	0	0	0
OTU775	2.081	5.661	0.0649509	0.374256	NotSig	Bacteria	Actinobacteria	Actinobacteria	Actinomycetales	Dermabacteraceae	Brachybacterium	0.001	0	0	0	0.004	0	0	0.003	0.002	0	0	0	0	0	0	0	0	0	0	0	0	0
OTU42	1.379	9.053	0.065167	0.374256	NotSig	Bacteria	Proteobacteria	Unassigned	Unassigned	Unassigned	Unassigned	0.071	0.027	0.1	0.174	0.117	0.068	0.072	0.02	0.051	0.002	0.01	0.101	0.071	0.026	0.045	0.018	0.008	0.027	0.002	0.018	0.049	0.005
OTU1453	1.807	7.358	0.0652835	0.374256	NotSig	Bacteria	Firmicutes	Clostridia	Clostridiales	Lachnospiraceae	Unassigned	0.021	0.005	0.098	0	0.018	0.005	0.009	0.033	0	0.045	0	0	0	0.009	0.003	0.003	0.003	0.002	0.005	0.002	0.015	0.007
OTU890	2.064	5.658	0.0660545	0.374256	NotSig	Bacteria	Firmicutes	Clostridia	Clostridiales	Unassigned	Unassigned	0.001	0	0	0.002	0	0	0	0	0	0	0.007	0	0	0	0	0	0	0	0	0	0	0
OTU1616	2.061	5.658	0.0662703	0.374256	NotSig	Bacteria	Actinobacteria	Actinobacteria	Coriobacteriales	Coriobacteriaceae	Unassigned	0.001	0	0	0	0	0	0	0.003	0	0	0.005	0.002	0	0	0	0	0	0	0	0	0	0
OTU922	-2.176	5.816	0.066277	0.374256	NotSig	Bacteria	Elusimicrobia	Elusimicrobia	Elusimicrobiales	Elusimicrobiaceae	Elusimicrobium	0	0.002	0.002	0	0	0	0	0	0	0	0	0	0.003	0.012	0.005	0.003	0	0	0	0	0	0
OTU1316	-2.769	5.758	0.0665062	0.374256	NotSig	Bacteria	Unassigned	Unassigned	Unassigned	Unassigned	Unassigned	0	0.002	0	0	0	0	0	0	0	0	0	0	0	0.02	0	0	0	0	0	0	0	0
OTU1647	2.265	7.018	0.0666143	0.374256	NotSig	Bacteria	Firmicutes	Clostridia	Clostridiales	Lachnospiraceae	Unassigned	0.015	0.003	0	0.005	0	0	0.011	0.013	0	0.004	0.112	0.002	0	0	0.011	0	0	0.002	0.007	0	0	0.007
OTU385	1.528	11.207	0.0668214	0.374256	NotSig	Bacteria	Bacteroidetes	Unassigned	Unassigned	Unassigned	Unassigned	0.331	0.127	0.179	0.048	0.139	1.351	0.812	0.477	0.006	0.02	0.243	0.03	0.066	0.196	0.264	0.105	0.016	0.417	0.002	0.053	0.084	0.068
OTU329	-1.78	6.848	0.0669367	0.374256	NotSig	Bacteria	Unassigned	Unassigned	Unassigned	Unassigned	Unassigned	0.003	0.01	0.007	0.01	0.002	0	0	0.005	0	0	0	0.008	0	0.014	0.003	0.003	0.025	0	0.035	0.01	0.007	0.005
OTU1668	2.05	5.656	0.0670578	0.374256	NotSig	Bacteria	Firmicutes	Clostridia	Clostridiales	Unassigned	Unassigned	0.001	0	0	0.005	0.004	0	0	0	0	0	0	0	0	0	0	0	0	0	0	0	0	0
OTU992	2.219	5.676	0.0673852	0.374256	NotSig	Bacteria	Unassigned	Unassigned	Unassigned	Unassigned	Unassigned	0.001	0	0	0.002	0	0	0	0	0	0	0	0.008	0	0	0	0	0	0	0	0	0	0
OTU1040	1.76	8.309	0.0673859	0.374256	NotSig	Bacteria	Firmicutes	Unassigned	Unassigned	Unassigned	Unassigned	0.041	0.012	0.012	0.005	0.009	0.005	0.065	0.008	0.139	0.018	0.144	0.006	0.008	0.006	0.005	0	0.011	0	0.012	0	0.002	0.075
OTU1178	2.213	5.675	0.0676106	0.374256	NotSig	Bacteria	Firmicutes	Clostridia	Clostridiales	Lachnospiraceae	Unassigned	0.001	0	0	0	0	0	0.002	0	0.008	0	0	0	0	0	0	0	0	0	0	0	0	0
OTU486	-3.173	6.112	0.0680712	0.374256	NotSig	Bacteria	Bacteroidetes	Bacteroidia	Bacteroidales	Prevotellaceae	Prevotella	0	0.005	0	0	0.002	0	0	0	0	0	0	0	0	0	0.047	0	0	0.002	0	0	0	0
OTU788	1.208	12.832	0.068226	0.374256	NotSig	Bacteria	Firmicutes	Unassigned	Unassigned	Unassigned	Unassigned	1.013	0.405	1.081	0.552	0.661	0.199	1.382	0.556	2.522	1.013	1.353	0.815	0.224	0.412	0.23	0.392	0.2	0.16	0.199	0.297	1.362	0.576
OTU1242	1.393	11.358	0.0683059	0.374256	NotSig	Bacteria	Firmicutes	Unassigned	Unassigned	Unassigned	Unassigned	0.381	0.13	1.253	0.111	0.75	0.012	0.145	0.058	0.881	0.079	0.379	0.141	0.025	0.202	0.029	0.204	0.027	0.086	0.103	0.245	0.254	0.127
OTU1423	-2.146	7.415	0.0683131	0.374256	NotSig	Bacteria	Firmicutes	Clostridia	Clostridiales	Ruminococcaceae	Unassigned	0.004	0.018	0.002	0.002	0.002	0.019	0.002	0.005	0.002	0.002	0	0.006	0	0	0	0.086	0.008	0	0.002	0.081	0	0
OTU1323	3.131	5.832	0.0685137	0.374256	NotSig	Bacteria	Firmicutes	Clostridia	Clostridiales	Clostridiales_Incertae_Sedis_XI	Unassigned	0.002	0	0	0	0.02	0	0	0	0	0	0	0	0	0	0	0	0	0	0	0	0	0
OTU472	-1.654	8.15	0.0692947	0.375099	NotSig	Bacteria	Bacteroidetes	Bacteroidia	Bacteroidales	Porphyromonadaceae	Unassigned	0.012	0.041	0.01	0.041	0.016	0	0.007	0.003	0.011	0.018	0	0.014	0.035	0.297	0	0.024	0.008	0.007	0.012	0.014	0.004	0.011
OTU1720	2.02	5.653	0.0693148	0.375099	NotSig	Bacteria	Firmicutes	Clostridia	Clostridiales	Ruminococcaceae	Anaerotruncus	0.001	0	0.002	0	0.002	0.002	0	0	0	0.002	0	0	0	0	0	0	0	0	0	0	0	0
OTU708	-1.479	12.697	0.069903	0.375099	NotSig	Bacteria	Firmicutes	Clostridia	Clostridiales	Ruminococcaceae	Unassigned	0.361	0.915	0.215	0.317	0.083	0.002	0.593	0.332	0.222	0.438	0.791	0.618	0.844	0.231	0.274	0.078	3.182	0.39	3.452	0.063	0.04	0.599
OTU641	-2.002	6.537	0.0704512	0.375099	NotSig	Bacteria	Bacteroidetes	Bacteroidia	Bacteroidales	Unassigned	Unassigned	0.002	0.008	0	0.005	0	0	0	0	0.004	0	0.002	0.006	0.016	0	0	0.003	0	0.043	0.002	0.008	0	0.007
OTU431	1.875	7.705	0.0704947	0.375099	NotSig	Bacteria	Bacteroidetes	Unassigned	Unassigned	Unassigned	Unassigned	0.024	0.007	0.007	0	0.004	0.124	0.09	0.005	0	0.004	0.007	0	0.022	0.014	0.011	0.005	0.008	0.009	0	0.002	0.002	0
OTU818	1.378	8.757	0.0707147	0.375099	NotSig	Bacteria	Unassigned	Unassigned	Unassigned	Unassigned	Unassigned	0.056	0.021	0.134	0.017	0.099	0.061	0.091	0.01	0.073	0.049	0.01	0.02	0.005	0.037	0.003	0.018	0.033	0.007	0	0.022	0.029	0.052
OTU674	-1.894	5.636	0.0709949	0.375099	NotSig	Bacteria	Bacteroidetes	Bacteroidia	Bacteroidales	Prevotellaceae	Prevotella	0	0.001	0	0	0	0	0	0	0	0	0	0	0	0	0	0.003	0	0	0	0.002	0.002	0
OTU575	-1.893	5.636	0.0710758	0.375099	NotSig	Bacteria	Bacteroidetes	Bacteroidia	Bacteroidales	Prevotellaceae	Prevotella	0	0.001	0	0	0	0	0	0	0	0	0	0	0.003	0	0	0	0.005	0	0	0	0	0
OTU1167	1.341	10.398	0.0711468	0.375099	NotSig	Bacteria	Firmicutes	Clostridia	Clostridiales	Ruminococcaceae	Unassigned	0.181	0.076	0.194	0.048	0.29	0.6	0.1	0.023	0.056	0.148	0.332	0.016	0.022	0.182	0.047	0.013	0.087	0.192	0.077	0.01	0.088	0.039
OTU313	1.988	5.648	0.0713712	0.375099	NotSig	Bacteria	Unassigned	Unassigned	Unassigned	Unassigned	Unassigned	0.001	0	0	0	0	0	0	0	0.004	0	0	0.004	0	0	0	0	0	0	0	0	0	0
OTU246	-1.886	5.635	0.0715495	0.375099	NotSig	Bacteria	Unassigned	Unassigned	Unassigned	Unassigned	Unassigned	0	0.001	0	0	0	0	0	0	0	0	0	0	0	0	0.003	0	0.003	0	0.002	0	0	0
OTU1007	1.98	5.647	0.0719796	0.375099	NotSig	Bacteria	Unassigned	Unassigned	Unassigned	Unassigned	Unassigned	0.001	0	0	0.007	0	0	0	0	0	0	0	0.002	0	0	0	0	0	0	0	0	0	0
OTU657	2.302	5.883	0.0722504	0.375099	NotSig	Bacteria	Bacteroidetes	Bacteroidia	Bacteroidales	Porphyromonadaceae	Unassigned	0.002	0	0.005	0.002	0.011	0	0	0	0	0.006	0	0	0.003	0	0	0	0	0	0	0	0	0
OTU1326	-2.582	5.726	0.072384	0.375099	NotSig	Bacteria	Unassigned	Unassigned	Unassigned	Unassigned	Unassigned	0	0.002	0	0	0	0	0	0	0	0	0	0	0	0.017	0	0	0	0	0	0	0	0
OTU1555	-2.582	5.726	0.072384	0.375099	NotSig	Bacteria	Firmicutes	Clostridia	Clostridiales	Ruminococcaceae	Unassigned	0	0.002	0	0	0	0	0	0	0	0	0	0	0	0.017	0	0	0	0	0	0	0	0
OTU548	-1.938	6.239	0.0725299	0.375099	NotSig	Bacteria	Bacteroidetes	Bacteroidia	Bacteroidales	Prevotellaceae	Prevotella	0.001	0.005	0.002	0.005	0.002	0	0	0	0	0	0	0.002	0.035	0.003	0.005	0.003	0	0.005	0	0.002	0	0
OTU1571	-1.766	6.199	0.0727149	0.375099	NotSig	Bacteria	Firmicutes	Clostridia	Clostridiales	Lachnospiraceae	Unassigned	0.001	0.004	0	0	0.002	0	0.002	0.003	0.002	0	0.002	0	0.003	0.003	0	0	0.014	0	0.012	0.002	0	0.009
OTU1710	2.98	5.8	0.0731249	0.375099	NotSig	Bacteria	Firmicutes	Clostridia	Clostridiales	Clostridiales_Incertae_Sedis_XI	Unassigned	0.002	0	0	0	0.018	0	0	0	0	0	0	0	0	0	0	0	0	0	0	0	0	0
OTU278	2.98	5.8	0.0731249	0.375099	NotSig	Bacteria	Proteobacteria	Gammaproteobacteria	Xanthomonadales	Xanthomonadaceae	Stenotrophomonas	0.002	0	0	0	0.018	0	0	0	0	0	0	0	0	0	0	0	0	0	0	0	0	0
OTU519	2.98	5.8	0.0731249	0.375099	NotSig	Bacteria	Bacteroidetes	Bacteroidia	Bacteroidales	Porphyromonadaceae	Unassigned	0.002	0	0	0	0.018	0	0	0	0	0	0	0	0	0	0	0	0	0	0	0	0	0
OTU1176	-1.863	5.632	0.0731832	0.375099	NotSig	Bacteria	Firmicutes	Clostridia	Clostridiales	Ruminococcaceae	Oscillibacter	0	0.001	0	0	0	0	0	0	0	0	0	0	0	0.003	0	0.003	0	0	0	0.002	0	0
OTU1626	-1.853	5.631	0.0739407	0.375099	NotSig	Bacteria	Firmicutes	Clostridia	Clostridiales	Lachnospiraceae	Unassigned	0	0.001	0	0	0	0	0	0	0	0	0	0	0	0	0.005	0	0	0	0.002	0	0	0
OTU21	-1.634	10.295	0.0739939	0.375099	NotSig	Bacteria	Planctomycetes	Planctomycetia	Planctomycetales	Planctomycetaceae	Unassigned	0.056	0.154	0.038	0.022	0.061	0.162	0.063	0.01	0.054	0.004	0.112	0.038	0.025	0.078	0	0.071	0.036	0.005	0.026	0.093	1.177	0.036
OTU1033	-2.06	13.764	0.0740958	0.375099	NotSig	Bacteria	Firmicutes	Clostridia	Clostridiales	Ruminococcaceae	Unassigned	0.555	2.1	1.772	0.123	1.341	0	0.018	0.005	0.019	0.01	0.731	1.535	4.933	0.012	0.003	0.366	7.103	0.05	8.104	0.414	0.004	0.014
OTU1562	2.942	5.793	0.0741657	0.375099	NotSig	Bacteria	Firmicutes	Clostridia	Clostridiales	Lachnospiraceae	Unassigned	0.002	0	0	0	0	0	0	0	0	0	0.02	0	0	0	0	0	0	0	0	0	0	0
OTU1292	1.364	6.78	0.0745836	0.375099	NotSig	Bacteria	Firmicutes	Clostridia	Clostridiales	Lachnospiraceae	Unassigned	0.009	0.003	0.002	0.01	0.004	0.005	0.005	0.008	0.023	0.002	0.012	0.02	0	0.006	0	0.005	0.008	0.007	0	0.004	0.002	0.002
OTU1081	1.944	5.642	0.07465	0.375099	NotSig	Bacteria	Firmicutes	Clostridia	Clostridiales	Unassigned	Unassigned	0.001	0	0	0.002	0	0	0.002	0	0	0	0	0.004	0	0	0	0	0	0	0	0	0	0
OTU1010	-1.842	5.629	0.0746961	0.375099	NotSig	Bacteria	Unassigned	Unassigned	Unassigned	Unassigned	Unassigned	0	0.001	0	0	0	0	0	0	0	0	0	0	0.005	0	0.003	0	0	0	0	0	0	0
OTU1345	-1.831	5.628	0.0755014	0.375099	NotSig	Bacteria	Firmicutes	Clostridia	Clostridiales	Unassigned	Unassigned	0	0.001	0	0	0	0	0	0	0	0	0	0	0.003	0.006	0	0	0	0	0	0	0	0
OTU401	-2.641	7.983	0.0756341	0.375099	NotSig	Bacteria	Bacteroidetes	Bacteroidia	Bacteroidales	Porphyromonadaceae	Unassigned	0.006	0.038	0	0	0	0.002	0	0.043	0	0	0.012	0	0.014	0.003	0.005	0	0	0.225	0	0	0	0.134
OTU248	2.915	5.785	0.0758223	0.375099	NotSig	Bacteria	Firmicutes	Unassigned	Unassigned	Unassigned	Unassigned	0.002	0	0	0	0	0.016	0	0	0	0	0	0	0	0	0	0	0	0	0	0	0	0
OTU272	-1.826	5.627	0.0758887	0.375099	NotSig	Bacteria	Proteobacteria	Betaproteobacteria	Burkholderiales	Unassigned	Unassigned	0	0.001	0	0	0	0	0	0	0	0	0	0	0.003	0	0.005	0	0	0	0	0	0	0
OTU663	1.879	6.909	0.075961	0.375099	NotSig	Bacteria	Bacteroidetes	Bacteroidia	Bacteroidales	Porphyromonadaceae	Unassigned	0.011	0.003	0.005	0.007	0	0	0.009	0.005	0.077	0.002	0.002	0.002	0.008	0	0	0	0.003	0.007	0.007	0	0.004	0
OTU1037	-1.825	5.627	0.075964	0.375099	NotSig	Bacteria	Firmicutes	Unassigned	Unassigned	Unassigned	Unassigned	0	0.001	0	0	0	0	0	0	0	0	0	0	0	0.006	0	0.003	0	0	0	0	0	0
OTU1252	2.014	8.371	0.0764249	0.375426	NotSig	Bacteria	Actinobacteria	Actinobacteria	Coriobacteriales	Coriobacteriaceae	Slackia	0.047	0.011	0.007	0.002	0.002	0.005	0.273	0.01	0.004	0.039	0.131	0	0	0	0	0	0.005	0.011	0.016	0	0.007	0.066
OTU290	-1.818	5.626	0.0765077	0.375426	NotSig	Bacteria	Unassigned	Unassigned	Unassigned	Unassigned	Unassigned	0	0.001	0	0	0	0	0	0	0	0	0	0	0	0.009	0	0	0	0	0	0	0	0
OTU1572	-1.809	5.625	0.0771582	0.375426	NotSig	Bacteria	Firmicutes	Clostridia	Clostridiales	Unassigned	Unassigned	0	0.001	0	0	0	0	0	0	0	0	0	0	0	0	0.003	0	0	0	0	0	0	0.005
OTU749	-1.809	5.625	0.07719	0.375426	NotSig	Bacteria	Actinobacteria	Actinobacteria	Coriobacteriales	Coriobacteriaceae	Olsenella	0	0.001	0	0	0	0	0	0	0	0	0	0	0	0	0	0	0	0	0	0	0	0.007
OTU756	-1.809	5.625	0.07719	0.375426	NotSig	Bacteria	Actinobacteria	Actinobacteria	Coriobacteriales	Coriobacteriaceae	Unassigned	0	0.001	0	0	0	0	0	0	0	0	0	0	0	0	0	0	0	0	0	0	0	0.007
OTU1201	-1.808	5.625	0.0773189	0.375426	NotSig	Bacteria	Unassigned	Unassigned	Unassigned	Unassigned	Unassigned	0	0.001	0	0	0	0	0	0	0	0	0	0	0.005	0	0	0	0	0.002	0	0	0	0
OTU264	2.812	5.768	0.0787844	0.379381	NotSig	Bacteria	Proteobacteria	Gammaproteobacteria	Aeromonadales	Aeromonadaceae	Aeromonas	0.002	0	0	0	0.016	0	0	0	0	0	0	0	0	0	0	0	0	0	0	0	0	0
OTU280	2.812	5.768	0.0787844	0.379381	NotSig	Bacteria	Proteobacteria	Betaproteobacteria	Burkholderiales	Comamonadaceae	Unassigned	0.002	0	0	0	0.016	0	0	0	0	0	0	0	0	0	0	0	0	0	0	0	0	0
OTU509	2.812	5.768	0.0787844	0.379381	NotSig	Bacteria	Bacteroidetes	Bacteroidia	Bacteroidales	Porphyromonadaceae	Unassigned	0.002	0	0	0	0.016	0	0	0	0	0	0	0	0	0	0	0	0	0	0	0	0	0
OTU493	1.675	12.273	0.079653	0.382381	NotSig	Bacteria	Bacteroidetes	Bacteroidia	Bacteroidales	Unassigned	Unassigned	0.818	0.243	0.041	0.436	0.009	0.002	0.778	0.436	0.006	5.552	0.05	0.867	0.134	0.135	1.216	0.013	0.424	0.063	0.087	0.014	0.274	0.073
OTU1577	1.878	5.633	0.079845	0.382381	NotSig	Bacteria	Firmicutes	Clostridia	Clostridiales	Ruminococcaceae	Unassigned	0.001	0	0	0	0	0	0.005	0	0	0	0	0.002	0	0	0	0	0	0	0	0	0	0
OTU1113	-2.195	8.98	0.0806149	0.384136	NotSig	Bacteria	Firmicutes	Clostridia	Clostridiales	Ruminococcaceae	Ruminococcus	0.017	0.076	0	0.012	0	0	0	0.043	0.026	0.043	0.01	0.032	0	0	0.084	0.013	0	0.122	0	0.016	0	0.522
OTU244	-2.355	5.692	0.080651	0.384136	NotSig	Bacteria	Unassigned	Unassigned	Unassigned	Unassigned	Unassigned	0	0.001	0	0	0	0	0	0	0	0	0	0	0	0	0	0	0	0	0	0	0	0.011
OTU866	1.875	6.635	0.0820468	0.388641	NotSig	Bacteria	Firmicutes	Unassigned	Unassigned	Unassigned	Unassigned	0.008	0.002	0	0.005	0	0.021	0.005	0	0.036	0	0.007	0.004	0	0	0.003	0	0.003	0.007	0.002	0	0	0.007
OTU129	2.279	6.602	0.0824042	0.388641	NotSig	Bacteria	Unassigned	Unassigned	Unassigned	Unassigned	Unassigned	0.009	0.001	0	0	0	0	0	0.013	0.008	0	0.062	0.006	0	0.003	0	0.003	0	0	0	0.004	0.004	0
OTU781	-1.561	6.657	0.0824484	0.388641	NotSig	Bacteria	Firmicutes	Clostridia	Clostridiales	Lachnospiraceae	Clostridium_XlVb	0.003	0.008	0.012	0.002	0.002	0	0.002	0	0.002	0.004	0.002	0.002	0.008	0.003	0.013	0.003	0.03	0	0.021	0.004	0	0
OTU1332	1.845	5.629	0.0824861	0.388641	NotSig	Bacteria	Actinobacteria	Actinobacteria	Coriobacteriales	Coriobacteriaceae	Unassigned	0.001	0	0	0	0	0	0.007	0	0	0	0	0	0	0	0	0	0	0	0	0	0	0
OTU1656	2.694	5.99	0.0845319	0.39657	NotSig	Bacteria	Firmicutes	Clostridia	Clostridiales	Clostridiaceae_1	Clostridium_sensu_stricto	0.003	0	0.007	0	0.022	0	0	0	0.002	0	0	0	0	0	0	0	0.003	0	0	0	0	0
OTU1550	-2.421	5.874	0.0850731	0.39657	NotSig	Bacteria	Firmicutes	Clostridia	Clostridiales	Unassigned	Unassigned	0	0.002	0	0	0	0	0	0	0	0	0	0.002	0	0	0	0.008	0	0	0	0.01	0.002	0
OTU142	-2.494	7.785	0.0850882	0.39657	NotSig	Bacteria	Unassigned	Unassigned	Unassigned	Unassigned	Unassigned	0.005	0.026	0.005	0.005	0.016	0.002	0	0	0	0	0	0.022	0	0	0	0.071	0	0	0	0.028	0.159	0
OTU159	-1.751	6.763	0.0857578	0.39657	NotSig	Bacteria	Firmicutes	Bacilli	Lactobacillales	Lactobacillaceae	Lactobacillus	0.003	0.01	0	0.012	0	0	0	0	0.009	0.002	0	0.004	0	0.017	0.029	0.005	0.008	0.014	0.016	0.01	0	0
OTU1583	2.621	5.734	0.0859727	0.39657	NotSig	Bacteria	Firmicutes	Clostridia	Clostridiales	Clostridiaceae_1	Unassigned	0.001	0	0	0	0.013	0	0	0	0	0	0	0	0	0	0	0	0	0	0	0	0	0
OTU308	2.621	5.734	0.0859727	0.39657	NotSig	Bacteria	Proteobacteria	Betaproteobacteria	Burkholderiales	Comamonadaceae	Unassigned	0.001	0	0	0	0.013	0	0	0	0	0	0	0	0	0	0	0	0	0	0	0	0	0
OTU508	2.621	5.734	0.0859727	0.39657	NotSig	Bacteria	Bacteroidetes	Bacteroidia	Bacteroidales	Porphyromonadaceae	Unassigned	0.001	0	0	0	0.013	0	0	0	0	0	0	0	0	0	0	0	0	0	0	0	0	0
OTU1368	-1.357	11.045	0.085984	0.39657	NotSig	Bacteria	Firmicutes	Clostridia	Clostridiales	Ruminococcaceae	Unassigned	0.117	0.322	0.026	0.087	0.011	0.082	0.353	0.041	0.049	0.03	0.273	0.219	0.541	0.723	0.955	0.044	0.077	0.056	0.028	0.03	0.035	0.728
OTU1417	1.172	7.633	0.0870911	0.399824	NotSig	Bacteria	Firmicutes	Clostridia	Clostridiales	Ruminococcaceae	Unassigned	0.022	0.009	0.026	0.056	0.016	0.002	0.022	0.005	0.047	0.028	0.012	0.006	0.014	0.009	0.011	0.008	0.011	0.007	0.002	0.01	0.011	0.009
OTU1516	1.938	6.081	0.0871469	0.399824	NotSig	Bacteria	Firmicutes	Clostridia	Clostridiales	Ruminococcaceae	Unassigned	0.004	0.001	0.005	0.017	0	0	0	0	0.009	0	0.005	0.002	0.003	0.003	0	0	0	0	0	0	0	0.002
OTU1540	-2.354	5.979	0.0883048	0.404075	NotSig	Bacteria	Firmicutes	Clostridia	Clostridiales	Lachnospiraceae	Butyrivibrio	0	0.003	0	0	0	0	0.004	0	0	0	0	0	0.003	0	0.021	0	0	0	0	0	0.002	0.007
OTU669	1.863	5.639	0.0885578	0.404175	NotSig	Bacteria	Bacteroidetes	Bacteroidia	Bacteroidales	Porphyromonadaceae	Odoribacter	0.001	0	0	0	0	0.007	0	0	0	0	0	0	0	0	0	0	0	0	0	0	0	0
OTU1036	1.517	8.936	0.0889744	0.404475	NotSig	Bacteria	Firmicutes	Unassigned	Unassigned	Unassigned	Unassigned	0.068	0.02	0.045	0.206	0.029	0.119	0.016	0.025	0.009	0.022	0.203	0.006	0.008	0.012	0	0.003	0	0.034	0.009	0.004	0.117	0.018
OTU363	1.208	12.391	0.0891299	0.404475	NotSig	Bacteria	Bacteroidetes	Unassigned	Unassigned	Unassigned	Unassigned	0.694	0.316	0.237	0.533	0.465	2.862	0.122	0.424	1.127	0.4	0.436	0.336	0.087	0.971	0.145	0.314	0.271	0.187	0.409	0.257	0.476	0.039
OTU1333	-1.458	10.849	0.089357	0.404475	NotSig	Bacteria	Firmicutes	Clostridia	Clostridiales	Ruminococcaceae	Gemmiger	0.102	0.255	0.27	0.063	0.081	0	0.197	0.089	0.019	0.039	0.119	0.145	0.025	0.314	0.042	0.037	0.938	0.135	0.8	0.01	0.002	0.247
OTU832	1.541	8.564	0.0895656	0.404475	NotSig	Bacteria	Firmicutes	Clostridia	Clostridiales	Unassigned	Unassigned	0.051	0.016	0.041	0.005	0.052	0.009	0.084	0.013	0.004	0.014	0.265	0.022	0.008	0.049	0	0.037	0	0.002	0.002	0.026	0.035	0.002
OTU117	-1.668	7.326	0.0897806	0.404475	NotSig	Bacteria	Firmicutes	Bacilli	Lactobacillales	Lactobacillaceae	Lactobacillus	0.006	0.018	0	0.015	0	0	0.002	0.003	0.004	0	0.027	0.006	0	0.003	0.063	0.031	0.008	0.007	0.007	0.02	0	0.036
OTU650	-3.039	6.812	0.0912547	0.409601	NotSig	Bacteria	Bacteroidetes	Bacteroidia	Bacteroidales	Porphyromonadaceae	Butyricimonas	0.001	0.015	0	0.002	0.004	0.005	0	0	0	0	0	0	0	0.147	0	0	0	0	0	0	0	0
OTU1018	-1.716	11.373	0.0914135	0.409601	NotSig	Bacteria	Firmicutes	Clostridia	Clostridiales	Lachnospiraceae	Unassigned	0.124	0.373	0.151	0	0.146	0	0.283	0.246	0.137	0.069	0.193	0.018	0.035	0.043	0.15	0	1.244	0.074	1.417	0.008	0.002	0.751
OTU376	-1.39	8.454	0.0932228	0.409601	NotSig	Bacteria	Bacteroidetes	Bacteroidia	Bacteroidales	Prevotellaceae	Alloprevotella	0.018	0.045	0.019	0	0.016	0.002	0.014	0.018	0.006	0.067	0.025	0.01	0.049	0.084	0.042	0.026	0.142	0.007	0.033	0.002	0.064	0
OTU261	1.804	5.631	0.0936639	0.409601	NotSig	Bacteria	Firmicutes	Unassigned	Unassigned	Unassigned	Unassigned	0.001	0	0	0.002	0	0.005	0	0	0	0	0	0	0	0	0	0	0	0	0	0	0	0
OTU696	1.804	5.631	0.0936639	0.409601	NotSig	Bacteria	Bacteroidetes	Bacteroidia	Bacteroidales	Porphyromonadaceae	Unassigned	0.001	0	0	0.002	0	0.005	0	0	0	0	0	0	0	0	0	0	0	0	0	0	0	0
OTU1197	1.802	5.63	0.0937302	0.409601	NotSig	Bacteria	Firmicutes	Unassigned	Unassigned	Unassigned	Unassigned	0.001	0	0	0	0.007	0	0	0	0	0	0	0	0	0	0	0	0	0	0	0	0	0
OTU320	1.802	5.63	0.0937302	0.409601	NotSig	Bacteria	Proteobacteria	Betaproteobacteria	Burkholderiales	Alcaligenaceae	Unassigned	0.001	0	0	0	0.007	0	0	0	0	0	0	0	0	0	0	0	0	0	0	0	0	0
OTU322	1.802	5.63	0.0937302	0.409601	NotSig	Bacteria	Proteobacteria	Betaproteobacteria	Burkholderiales	Comamonadaceae	Lampropedia	0.001	0	0	0	0.007	0	0	0	0	0	0	0	0	0	0	0	0	0	0	0	0	0
OTU543	1.802	5.63	0.0937302	0.409601	NotSig	Bacteria	Bacteroidetes	Bacteroidia	Bacteroidales	Porphyromonadaceae	Unassigned	0.001	0	0	0	0.007	0	0	0	0	0	0	0	0	0	0	0	0	0	0	0	0	0
OTU617	1.802	5.63	0.0937302	0.409601	NotSig	Bacteria	Bacteroidetes	Flavobacteriia	Flavobacteriales	Flavobacteriaceae	Unassigned	0.001	0	0	0	0.007	0	0	0	0	0	0	0	0	0	0	0	0	0	0	0	0	0
OTU670	1.802	5.63	0.0937302	0.409601	NotSig	Bacteria	Bacteroidetes	Bacteroidia	Bacteroidales	Bacteroidaceae	Anaerorhabdus	0.001	0	0	0	0.007	0	0	0	0	0	0	0	0	0	0	0	0	0	0	0	0	0
OTU677	1.802	5.63	0.0937302	0.409601	NotSig	Bacteria	Bacteroidetes	Bacteroidia	Bacteroidales	Porphyromonadaceae	Unassigned	0.001	0	0	0	0.007	0	0	0	0	0	0	0	0	0	0	0	0	0	0	0	0	0
OTU291	-1.496	9.431	0.0940056	0.40978	NotSig	Bacteria	Firmicutes	Negativicutes	Selenomonadales	Veillonellaceae	Unassigned	0.034	0.106	0.048	0.039	0.009	0.014	0.041	0	0.015	0.012	0.012	0.153	0.025	0.571	0.069	0.008	0.279	0.025	0.023	0	0.011	0.052
OTU15	-1.158	13.077	0.0947262	0.411421	NotSig	Bacteria	Unassigned	Unassigned	Unassigned	Unassigned	Unassigned	0.53	1.182	0.796	0.266	1.119	0.728	0.197	0.076	0.163	0.203	1.294	0.457	0.691	3.968	0.158	0.837	0.276	1.357	0.751	1.375	1.214	1.197
OTU1352	1.79	5.629	0.0949088	0.411421	NotSig	Bacteria	Firmicutes	Clostridia	Clostridiales	Ruminococcaceae	Unassigned	0.001	0	0	0	0.002	0.002	0	0	0.002	0	0	0	0	0	0	0	0	0	0	0	0	0
OTU1344	2.4	5.701	0.0955589	0.411421	NotSig	Bacteria	Candidatus_Saccharibacteria	Unassigned	Unassigned	Unassigned	Saccharibacteria_genera_incertae_sedis	0.001	0	0	0	0.011	0	0	0	0	0	0	0	0	0	0	0	0	0	0	0	0	0
OTU309	2.4	5.701	0.0955589	0.411421	NotSig	Bacteria	Proteobacteria	Betaproteobacteria	Burkholderiales	Alcaligenaceae	Paenalcaligenes	0.001	0	0	0	0.011	0	0	0	0	0	0	0	0	0	0	0	0	0	0	0	0	0
OTU384	2.4	5.701	0.0955589	0.411421	NotSig	Bacteria	Bacteroidetes	Bacteroidia	Bacteroidales	Porphyromonadaceae	Unassigned	0.001	0	0	0	0.011	0	0	0	0	0	0	0	0	0	0	0	0	0	0	0	0	0
OTU1669	1.775	5.627	0.0961321	0.412872	NotSig	Bacteria	Unassigned	Unassigned	Unassigned	Unassigned	Unassigned	0.001	0	0	0	0	0	0	0.008	0	0	0	0	0	0	0	0	0	0	0	0	0	0
OTU665	2.366	5.696	0.0968634	0.413825	NotSig	Bacteria	Unassigned	Unassigned	Unassigned	Unassigned	Unassigned	0.001	0	0	0	0	0	0	0	0	0	0.012	0	0	0	0	0	0	0	0	0	0	0
OTU207	-2.317	5.87	0.0971767	0.413825	NotSig	Bacteria	Unassigned	Unassigned	Unassigned	Unassigned	Unassigned	0	0.002	0	0	0.002	0	0	0	0	0	0	0	0	0	0.003	0	0	0.005	0	0	0	0.016
OTU382	1.763	5.626	0.0972163	0.413825	NotSig	Bacteria	Bacteroidetes	Bacteroidia	Bacteroidales	Prevotellaceae	Prevotella	0.001	0	0	0.002	0.004	0	0	0	0	0	0	0	0	0	0	0	0	0	0	0	0	0
OTU71	2.625	5.975	0.097581	0.413825	NotSig	Bacteria	Firmicutes	Bacilli	Lactobacillales	Enterococcaceae	Enterococcus	0.003	0	0	0.002	0.025	0	0	0	0	0	0	0.002	0	0	0	0	0	0	0	0.002	0	0
OTU757	1.585	7.025	0.0978034	0.413825	NotSig	Bacteria	Actinobacteria	Actinobacteria	Coriobacteriales	Coriobacteriaceae	Olsenella	0.013	0.004	0.005	0.002	0.004	0.005	0.025	0.041	0	0.028	0.025	0	0	0	0.003	0	0.008	0.018	0.002	0.006	0.002	0
OTU642	-2.688	7.278	0.0981283	0.413825	NotSig	Bacteria	Bacteroidetes	Bacteroidia	Bacteroidales	Porphyromonadaceae	Butyricimonas	0.003	0.023	0	0.002	0	0.009	0	0	0	0	0	0.014	0	0.222	0.008	0	0	0.002	0	0	0	0
OTU462	-1.586	7.279	0.0985109	0.413825	NotSig	Bacteria	Bacteroidetes	Bacteroidia	Bacteroidales	Porphyromonadaceae	Unassigned	0.006	0.016	0	0.034	0	0	0.002	0.008	0.006	0	0.002	0.006	0.005	0	0	0.01	0.033	0.045	0.007	0.02	0.029	0.007
OTU1651	-1.633	6.037	0.0986396	0.413825	NotSig	Bacteria	Firmicutes	Clostridia	Clostridiales	Lachnospiraceae	Unassigned	0.001	0.003	0.005	0	0.002	0	0.002	0	0	0	0	0	0	0	0.005	0.003	0.008	0.009	0.002	0.004	0	0
OTU1124	-1.955	7.057	0.0986682	0.413825	NotSig	Bacteria	Firmicutes	Clostridia	Clostridiales	Unassigned	Unassigned	0.004	0.015	0.007	0.019	0.009	0	0	0	0	0.002	0	0	0	0.069	0.013	0.037	0.027	0	0	0.006	0.002	0
OTU903	1.745	5.623	0.0989625	0.413825	NotSig	Bacteria	Firmicutes	Clostridia	Clostridiales	Ruminococcaceae	Pseudoflavonifractor	0.001	0	0	0.005	0	0.002	0	0	0	0	0	0	0	0	0	0	0	0	0	0	0	0
OTU1688	1.598	6.321	0.0992359	0.413825	NotSig	Bacteria	Firmicutes	Clostridia	Clostridiales	Ruminococcaceae	Unassigned	0.006	0.001	0.005	0.024	0.007	0	0	0.005	0.004	0	0.005	0.006	0	0	0.003	0	0.005	0	0	0.004	0	0.002
OTU1277	-2.038	7.669	0.099335	0.413825	NotSig	Bacteria	Firmicutes	Clostridia	Clostridiales	Unassigned	Unassigned	0.006	0.025	0.002	0	0	0	0	0	0	0.004	0.055	0.002	0	0	0.069	0.013	0.038	0.043	0.084	0.002	0	0.002
OTU1278	-1.361	6.885	0.0994317	0.413825	NotSig	Bacteria	Unassigned	Unassigned	Unassigned	Unassigned	Unassigned	0.004	0.01	0.002	0.017	0	0	0.014	0	0	0.004	0.002	0.002	0.035	0.006	0.005	0.016	0.005	0.002	0.005	0.012	0.007	0.011
OTU439	1.725	8.092	0.100334	0.41659	NotSig	Bacteria	Bacteroidetes	Unassigned	Unassigned	Unassigned	Unassigned	0.037	0.01	0.007	0.23	0.04	0.016	0	0	0.06	0	0	0.012	0.025	0.017	0.005	0.008	0.005	0	0.014	0.01	0.015	0
OTU1503	-2.573	6.21	0.100815	0.416744	NotSig	Bacteria	Firmicutes	Clostridia	Clostridiales	Ruminococcaceae	Unassigned	0.001	0.004	0.002	0	0	0	0.002	0	0	0	0.002	0	0	0.003	0	0	0	0	0	0	0.04	0
OTU938	1.726	5.621	0.100848	0.416744	NotSig	Bacteria	Firmicutes	Clostridia	Clostridiales	Lachnospiraceae	Clostridium_XlVb	0.001	0	0	0	0.004	0	0	0	0	0.002	0	0	0	0	0	0	0	0	0	0	0	0
OTU1610	1.715	5.62	0.101622	0.418884	NotSig	Bacteria	Firmicutes	Clostridia	Clostridiales	Ruminococcaceae	Unassigned	0.001	0	0	0.005	0	0	0	0.003	0	0	0	0	0	0	0	0	0	0	0	0	0	0
OTU461	-1.687	8.176	0.102473	0.418884	NotSig	Bacteria	Bacteroidetes	Bacteroidia	Bacteroidales	Prevotellaceae	Unassigned	0.012	0.04	0.022	0.039	0.002	0	0.004	0.015	0	0.008	0.002	0.032	0.038	0.006	0.277	0	0.036	0	0.009	0	0.007	0.032
OTU1276	-1.839	7.215	0.102685	0.418884	NotSig	Bacteria	Firmicutes	Clostridia	Clostridiales	Ruminococcaceae	Unassigned	0.004	0.015	0.012	0.005	0.004	0.005	0.002	0.005	0.008	0	0	0.004	0	0.037	0	0.008	0	0	0	0.008	0.093	0
OTU690	1.702	5.618	0.102786	0.418884	NotSig	Bacteria	Bacteroidetes	Bacteroidia	Bacteroidales	Porphyromonadaceae	Unassigned	0.001	0	0	0	0	0	0	0	0.006	0	0	0	0	0	0	0	0	0	0	0	0	0
OTU1306	1.463	6.279	0.102857	0.418884	NotSig	Bacteria	Firmicutes	Clostridia	Clostridiales	Lachnospiraceae	Unassigned	0.005	0.002	0.007	0.005	0.002	0.007	0	0	0.004	0.002	0.02	0.002	0	0.003	0.003	0	0.005	0	0.002	0.002	0	0
OTU853	1.536	7.882	0.102878	0.418884	NotSig	Bacteria	Firmicutes	Unassigned	Unassigned	Unassigned	Unassigned	0.029	0.009	0.017	0.068	0.018	0.054	0.029	0.005	0.004	0.02	0.077	0	0	0.003	0	0.008	0.005	0.016	0.051	0.002	0	0.002
OTU1235	2.214	5.676	0.103044	0.418884	NotSig	Bacteria	Firmicutes	Clostridia	Clostridiales	Lachnospiraceae	Unassigned	0.001	0	0	0	0	0	0	0	0	0	0	0.01	0	0	0	0	0	0	0	0	0	0
OTU1360	-1.673	10.258	0.104013	0.419642	NotSig	Bacteria	Firmicutes	Clostridia	Clostridiales	Lachnospiraceae	Unassigned	0.056	0.167	0.029	0.031	0.009	0	0.007	0	0.051	0.093	0.025	0.32	0.008	0.084	0.037	0.024	0.645	0.005	0.709	0.008	0	0.152
OTU723	1.687	5.616	0.104359	0.419642	NotSig	Bacteria	Tenericutes	Mollicutes	Anaeroplasmatales	Anaeroplasmataceae	Anaeroplasma	0.001	0	0.005	0	0.002	0	0	0	0	0	0	0	0	0	0	0	0	0	0	0	0	0
OTU1192	1.684	5.616	0.104443	0.419642	NotSig	Bacteria	Firmicutes	Clostridia	Clostridiales	Ruminococcaceae	Unassigned	0.001	0	0	0.007	0	0	0	0	0	0	0	0	0	0	0	0	0	0	0	0	0	0
OTU1533	1.518	5.866	0.104525	0.419642	NotSig	Bacteria	Firmicutes	Clostridia	Clostridiales	Lachnospiraceae	Unassigned	0.002	0.001	0	0.002	0	0.005	0.002	0.003	0	0.002	0.002	0.004	0.003	0	0	0.003	0	0	0	0	0	0
OTU57	2.053	7.052	0.10455	0.419642	NotSig	Bacteria	Spirochaetes	Spirochaetia	Spirochaetales	Spirochaetaceae	Treponema	0.015	0.003	0.007	0	0.025	0	0.016	0.003	0	0.087	0.012	0	0	0	0	0.005	0	0	0	0.004	0.018	0
OTU148	-1.448	7.841	0.104942	0.419642	NotSig	Bacteria	Unassigned	Unassigned	Unassigned	Unassigned	Unassigned	0.01	0.026	0.002	0.019	0.002	0	0	0.02	0.004	0.01	0.035	0.01	0.003	0.017	0.021	0.024	0	0.016	0.005	0.028	0.009	0.138
OTU1576	1.679	5.615	0.105051	0.419642	NotSig	Bacteria	Firmicutes	Clostridia	Clostridiales	Unassigned	Unassigned	0.001	0	0.005	0	0	0	0	0	0	0	0.002	0	0	0	0	0	0	0	0	0	0	0
OTU1250	1.358	9.259	0.105545	0.419642	NotSig	Bacteria	Firmicutes	Unassigned	Unassigned	Unassigned	Unassigned	0.079	0.031	0.024	0.012	0.034	0.073	0.33	0.015	0.203	0.026	0.057	0.018	0	0.118	0.024	0.008	0.03	0.002	0.03	0.006	0.084	0.011
OTU823	1.005	8.745	0.10561	0.419642	NotSig	Bacteria	Firmicutes	Clostridia	Clostridiales	Ruminococcaceae	Unassigned	0.053	0.025	0.088	0.053	0.097	0.028	0.048	0.089	0.019	0.045	0.037	0.026	0.011	0.04	0.042	0.016	0.022	0.027	0.028	0.016	0.015	0.036
OTU1006	1.674	5.615	0.105631	0.419642	NotSig	Bacteria	Firmicutes	Clostridia	Clostridiales	Unassigned	Unassigned	0.001	0	0	0	0	0	0.002	0.003	0	0	0	0.002	0	0	0	0	0	0	0	0	0	0
OTU1367	1.211	9.698	0.106858	0.422986	NotSig	Bacteria	Firmicutes	Clostridia	Clostridiales	Ruminococcaceae	Unassigned	0.109	0.041	0.146	0.053	0.072	0.311	0.036	0.008	0.077	0.231	0.05	0.105	0.022	0.02	0.011	0.063	0.008	0.018	0.044	0.103	0.111	0.009
OTU1056	1.658	5.613	0.107124	0.422986	NotSig	Bacteria	Firmicutes	Clostridia	Clostridiales	Ruminococcaceae	Unassigned	0.001	0	0	0	0	0	0	0	0.004	0.002	0	0	0	0	0	0	0	0	0	0	0	0
OTU684	1.657	5.613	0.107198	0.422986	NotSig	Bacteria	Bacteroidetes	Bacteroidia	Bacteroidales	Porphyromonadaceae	Unassigned	0.001	0	0	0	0	0	0.002	0	0.004	0	0	0	0	0	0	0	0	0	0	0	0	0
OTU1269	-1.336	7.543	0.108928	0.4285	NotSig	Bacteria	Firmicutes	Clostridia	Clostridiales	Unassigned	Unassigned	0.008	0.02	0.002	0.007	0	0.005	0.013	0.003	0.023	0.018	0	0.008	0	0.066	0.016	0.034	0.025	0.002	0.009	0.032	0.013	0.005
OTU888	-1.618	6.747	0.109086	0.4285	NotSig	Bacteria	Firmicutes	Clostridia	Clostridiales	Ruminococcaceae	Unassigned	0.003	0.009	0	0.002	0	0.002	0.009	0	0.008	0	0.002	0.004	0	0.009	0	0.003	0.005	0.005	0	0.012	0.002	0.054
OTU139	-2.172	8.134	0.110339	0.432075	NotSig	Bacteria	Unassigned	Unassigned	Unassigned	Unassigned	Unassigned	0.009	0.04	0	0.005	0	0	0	0.008	0	0	0.059	0.014	0.003	0	0.013	0	0	0.201	0.005	0	0.002	0.179
OTU841	-2.144	8.629	0.110614	0.432075	NotSig	Bacteria	Firmicutes	Clostridia	Clostridiales	Ruminococcaceae	Unassigned	0.013	0.052	0	0.019	0	0	0	0.041	0	0	0	0.07	0	0	0	0.102	0.167	0.014	0.131	0.083	0	0.025
OTU721	1.345	11.73	0.110738	0.432075	NotSig	Bacteria	Proteobacteria	Gammaproteobacteria	Aeromonadales	Succinivibrionaceae	Succinivibrio	0.465	0.203	0.33	0.126	0.436	1.993	0.052	0.266	0.058	1.155	0.079	0.155	1.097	0.164	0.293	0.068	0.036	0.05	0.002	0.026	0.018	0.274
OTU904	1.491	6.164	0.112054	0.436235	NotSig	Bacteria	Firmicutes	Clostridia	Clostridiales	Unassigned	Unassigned	0.004	0.001	0.01	0.005	0.002	0.002	0	0	0.002	0.002	0.015	0.004	0.003	0	0	0	0	0.005	0	0	0.004	0
OTU491	1.606	5.607	0.112326	0.436326	NotSig	Bacteria	Bacteroidetes	Unassigned	Unassigned	Unassigned	Unassigned	0.001	0	0	0.002	0	0	0.004	0	0	0	0	0	0	0	0	0	0	0	0	0	0	0
OTU1726	1.566	5.602	0.116419	0.445693	NotSig	Bacteria	Actinobacteria	Actinobacteria	Coriobacteriales	Coriobacteriaceae	Unassigned	0.001	0	0	0	0	0	0.005	0	0	0	0	0	0	0	0	0	0	0	0	0	0	0
OTU378	1.566	5.602	0.116419	0.445693	NotSig	Bacteria	Bacteroidetes	Bacteroidia	Bacteroidales	Prevotellaceae	Prevotella	0.001	0	0	0	0	0	0.005	0	0	0	0	0	0	0	0	0	0	0	0	0	0	0
OTU1407	-2.05	6.914	0.116736	0.445693	NotSig	Bacteria	Firmicutes	Clostridia	Clostridiales	Lachnospiraceae	Unassigned	0.003	0.013	0	0	0	0	0.014	0.01	0	0.004	0	0	0.025	0	0.069	0	0	0.009	0	0	0.002	0.027
OTU824	-2.66	7.462	0.116743	0.445693	NotSig	Bacteria	Firmicutes	Clostridia	Clostridiales	Unassigned	Unassigned	0.003	0.025	0	0	0	0	0	0	0	0	0.035	0	0	0	0	0	0.016	0.212	0.014	0	0	0.005
OTU1635	-1.574	6.809	0.11679	0.445693	NotSig	Bacteria	Firmicutes	Clostridia	Clostridiales	Lachnospiraceae	Roseburia	0.004	0.009	0.022	0.005	0	0	0.002	0.003	0	0.002	0	0.004	0	0.003	0.011	0	0.008	0.007	0.047	0	0.004	0.014
OTU1400	1.063	8.585	0.117131	0.445693	NotSig	Bacteria	Firmicutes	Clostridia	Clostridiales	Ruminococcaceae	Unassigned	0.048	0.023	0.091	0.063	0.027	0.077	0.036	0.046	0.008	0.041	0.052	0.036	0.076	0.02	0.042	0.013	0.025	0.023	0.005	0.01	0.002	0.014
OTU138	2.089	7.343	0.117641	0.445693	NotSig	Bacteria	Spirochaetes	Spirochaetia	Spirochaetales	Spirochaetaceae	Treponema	0.017	0.004	0.005	0.007	0.002	0.148	0.005	0	0	0	0.002	0	0.003	0.02	0	0	0	0.002	0	0	0.018	0
OTU764	1.926	5.813	0.117648	0.445693	NotSig	Bacteria	Tenericutes	Mollicutes	Unassigned	Unassigned	Unassigned	0.002	0	0	0.01	0	0.005	0	0	0.002	0	0	0.002	0	0	0	0	0	0	0	0	0.002	0
OTU1214	-1.523	5.602	0.117812	0.445693	NotSig	Bacteria	Firmicutes	Clostridia	Clostridiales	Unassigned	Unassigned	0	0	0	0	0	0	0	0	0	0	0	0	0	0	0	0	0	0	0.005	0	0	0
OTU1215	-1.523	5.602	0.117812	0.445693	NotSig	Bacteria	Firmicutes	Clostridia	Clostridiales	Ruminococcaceae	Unassigned	0	0	0	0	0	0	0	0	0	0	0	0	0	0	0	0	0	0	0.005	0	0	0
OTU1282	-1.523	5.602	0.117812	0.445693	NotSig	Bacteria	Unassigned	Unassigned	Unassigned	Unassigned	Unassigned	0	0	0	0	0	0	0	0	0	0	0	0	0	0	0	0	0	0	0.005	0	0	0
OTU1524	2.791	5.996	0.117984	0.445693	NotSig	Bacteria	Proteobacteria	Alphaproteobacteria	Unassigned	Unassigned	Unassigned	0.003	0	0	0	0	0	0	0.003	0	0	0.032	0	0	0	0.003	0	0	0	0	0	0	0
OTU1465	-1.517	5.601	0.118307	0.445693	NotSig	Bacteria	Firmicutes	Clostridia	Clostridiales	Ruminococcaceae	Unassigned	0	0	0	0	0	0	0	0	0	0	0	0	0	0	0	0	0	0	0	0.004	0	0
OTU296	-1.517	5.601	0.118307	0.445693	NotSig	Bacteria	Unassigned	Unassigned	Unassigned	Unassigned	Unassigned	0	0	0	0	0	0	0	0	0	0	0	0	0	0	0	0	0	0	0	0.004	0	0
OTU1599	-2.527	5.898	0.118916	0.445951	NotSig	Bacteria	Firmicutes	Clostridia	Clostridiales	Lachnospiraceae	Clostridium_XlVa	0	0.002	0	0	0	0	0	0	0	0	0	0.002	0	0	0	0.016	0	0	0	0.008	0	0
OTU269	-2.017	5.793	0.119	0.445951	NotSig	Bacteria	Verrucomicrobia	Unassigned	Unassigned	Unassigned	Unassigned	0	0.002	0	0	0	0	0	0	0	0	0	0.002	0	0.009	0	0.008	0	0	0	0.002	0	0
OTU35	1.472	11.141	0.119172	0.445951	NotSig	Bacteria	Bacteroidetes	Bacteroidia	Bacteroidales	Prevotellaceae	Prevotella	0.336	0.123	0.033	0.019	0.038	0.101	1.052	1.126	0.008	0.004	0.976	0.002	0.137	0.069	0.032	0.084	0.022	0.699	0.002	0.097	0.062	0.023
OTU1637	-1.5	5.599	0.120062	0.445951	NotSig	Bacteria	Firmicutes	Clostridia	Clostridiales	Lachnospiraceae	Unassigned	0	0	0	0	0	0	0	0	0	0	0	0	0	0	0	0	0	0	0	0	0.004	0
OTU584	-1.5	5.599	0.120062	0.445951	NotSig	Bacteria	Bacteroidetes	Bacteroidia	Bacteroidales	Prevotellaceae	Prevotella	0	0	0	0	0	0	0	0	0	0	0	0	0	0	0	0	0	0	0	0	0.004	0
OTU1628	-1.5	5.599	0.120062	0.445951	NotSig	Bacteria	Firmicutes	Clostridia	Clostridiales	Lachnospiraceae	Unassigned	0	0.001	0	0	0	0	0	0	0	0	0	0	0	0	0	0	0.005	0	0	0	0	0
OTU1633	-2.057	6.494	0.120337	0.445951	NotSig	Bacteria	Firmicutes	Clostridia	Clostridiales	Lachnospiraceae	Unassigned	0.002	0.007	0.002	0	0.009	0	0.002	0	0	0	0	0.002	0.003	0	0	0	0.041	0	0.023	0.002	0	0
OTU416	-1.261	8.217	0.121262	0.445951	NotSig	Bacteria	Bacteroidetes	Unassigned	Unassigned	Unassigned	Unassigned	0.015	0.039	0.012	0.051	0.013	0.021	0.02	0.003	0	0.018	0.017	0	0.044	0.187	0.024	0.047	0.014	0.018	0.002	0.022	0.022	0.007
OTU123	1.714	7.857	0.121764	0.445951	NotSig	Bacteria	Firmicutes	Bacilli	Lactobacillales	Lactobacillaceae	Lactobacillus	0.031	0.008	0.081	0.002	0.009	0	0.002	0.084	0.002	0.041	0.092	0	0.019	0	0.003	0.01	0	0	0	0.018	0	0.029
OTU1187	-1.481	5.597	0.121997	0.445951	NotSig	Bacteria	Firmicutes	Clostridia	Clostridiales	Unassigned	Unassigned	0	0	0	0	0	0	0	0	0	0	0	0	0	0	0	0.003	0	0	0	0.002	0	0
OTU1209	-1.481	5.597	0.121997	0.445951	NotSig	Bacteria	Firmicutes	Unassigned	Unassigned	Unassigned	Unassigned	0	0	0	0	0	0	0	0	0	0	0	0	0	0	0	0.003	0	0	0	0.002	0	0
OTU440	-1.646	6.395	0.122288	0.445951	NotSig	Bacteria	Bacteroidetes	Bacteroidia	Bacteroidales	Porphyromonadaceae	Unassigned	0.002	0.006	0	0	0	0	0.004	0.008	0	0.002	0.005	0	0	0	0.016	0	0	0.007	0.002	0.002	0.007	0.025
OTU257	-1.475	5.596	0.122646	0.445951	NotSig	Bacteria	Unassigned	Unassigned	Unassigned	Unassigned	Unassigned	0	0.001	0	0	0	0	0	0	0	0	0	0	0	0.003	0	0	0	0	0.002	0	0	0
OTU387	-2.363	7.319	0.122755	0.445951	NotSig	Bacteria	Bacteroidetes	Bacteroidia	Bacteroidales	Prevotellaceae	Prevotella	0.004	0.021	0	0	0	0	0.016	0	0	0	0.02	0	0.06	0	0	0	0	0.113	0	0.006	0	0.027
OTU985	-1.472	5.596	0.122884	0.445951	NotSig	Bacteria	Firmicutes	Clostridia	Clostridiales	Eubacteriaceae	Unassigned	0	0	0	0	0	0	0	0	0	0	0	0	0	0	0	0.003	0	0	0	0	0.002	0
OTU334	1.533	6.539	0.123272	0.445951	NotSig	Bacteria	Spirochaetes	Spirochaetia	Spirochaetales	Spirochaetaceae	Unassigned	0.007	0.002	0	0.007	0.011	0.03	0.004	0.003	0.006	0.004	0	0.002	0.011	0.003	0	0.005	0	0	0	0	0.004	0
OTU737	-1.097	13.573	0.124036	0.445951	NotSig	Bacteria	Firmicutes	Clostridia	Clostridiales	Ruminococcaceae	Unassigned	0.798	1.638	0.665	0.3	0.306	1.173	1.121	1.41	0.295	1.939	0.634	0.133	0.748	0.602	0.367	0.356	6.294	2.934	2.503	0.18	0.586	1.81
OTU265	-1.459	5.595	0.124189	0.445951	NotSig	Bacteria	Proteobacteria	Betaproteobacteria	Burkholderiales	Unassigned	Unassigned	0	0.001	0	0	0	0	0	0	0	0	0	0	0.005	0	0	0	0	0	0	0	0	0
OTU352	-1.459	5.595	0.124189	0.445951	NotSig	Bacteria	Unassigned	Unassigned	Unassigned	Unassigned	Unassigned	0	0.001	0	0	0	0	0	0	0	0	0	0	0.005	0	0	0	0	0	0	0	0	0
OTU546	-1.459	5.595	0.124189	0.445951	NotSig	Bacteria	Bacteroidetes	Bacteroidia	Bacteroidales	Prevotellaceae	Prevotella	0	0.001	0	0	0	0	0	0	0	0	0	0	0.005	0	0	0	0	0	0	0	0	0
OTU978	-1.451	5.594	0.12496	0.445951	NotSig	Bacteria	Firmicutes	Unassigned	Unassigned	Unassigned	Unassigned	0	0.001	0	0	0	0	0	0	0	0	0	0	0.003	0	0	0.003	0	0	0	0	0	0
OTU870	-1.478	6.323	0.12542	0.445951	NotSig	Bacteria	Firmicutes	Clostridia	Unassigned	Unassigned	Unassigned	0.002	0.005	0	0.002	0	0.005	0.004	0	0.002	0.004	0	0	0	0.006	0.003	0.003	0.005	0.002	0	0.004	0.024	0
OTU571	-1.444	5.593	0.125733	0.445951	NotSig	Bacteria	Bacteroidetes	Bacteroidia	Bacteroidales	Prevotellaceae	Prevotella	0	0.001	0	0	0	0	0	0	0	0	0	0	0	0	0	0.005	0	0	0	0	0	0
OTU1539	-1.625	5.852	0.126009	0.445951	NotSig	Bacteria	Firmicutes	Clostridia	Clostridiales	Lachnospiraceae	Unassigned	0	0.002	0	0	0	0	0	0	0.002	0	0.002	0	0.003	0	0.011	0	0.003	0.002	0	0.002	0	0
OTU897	-1.749	6.385	0.126616	0.445951	NotSig	Bacteria	Unassigned	Unassigned	Unassigned	Unassigned	Unassigned	0.002	0.007	0.002	0.002	0.004	0.005	0.002	0	0	0	0	0	0.005	0.055	0.003	0.003	0	0	0	0	0	0.005
OTU225	1.767	7.933	0.126917	0.445951	NotSig	Bacteria	Firmicutes	Negativicutes	Selenomonadales	Veillonellaceae	Megasphaera	0.031	0.009	0.01	0	0.02	0.044	0.013	0.091	0	0.002	0.129	0.002	0	0	0.024	0	0	0.041	0	0	0.002	0.027
OTU1304	-1.726	7.898	0.127072	0.445951	NotSig	Bacteria	Unassigned	Unassigned	Unassigned	Unassigned	Unassigned	0.009	0.028	0.012	0	0	0.002	0.054	0	0.013	0.006	0.002	0	0	0.04	0	0.003	0.055	0.009	0.133	0	0.002	0.036
OTU1012	-1.427	5.591	0.127559	0.445951	NotSig	Bacteria	Firmicutes	Clostridia	Clostridiales	Unassigned	Unassigned	0	0.001	0	0	0	0	0	0	0	0	0	0	0	0.006	0	0	0	0	0	0	0	0
OTU1013	-1.427	5.591	0.127559	0.445951	NotSig	Bacteria	Firmicutes	Clostridia	Clostridiales	Ruminococcaceae	Unassigned	0	0.001	0	0	0	0	0	0	0	0	0	0	0	0.006	0	0	0	0	0	0	0	0
OTU288	-1.427	5.591	0.127559	0.445951	NotSig	Bacteria	Unassigned	Unassigned	Unassigned	Unassigned	Unassigned	0	0.001	0	0	0	0	0	0	0	0	0	0	0	0.006	0	0	0	0	0	0	0	0
OTU289	-1.427	5.591	0.127559	0.445951	NotSig	Bacteria	Unassigned	Unassigned	Unassigned	Unassigned	Unassigned	0	0.001	0	0	0	0	0	0	0	0	0	0	0	0.006	0	0	0	0	0	0	0	0
OTU347	-1.427	5.591	0.127559	0.445951	NotSig	Bacteria	Unassigned	Unassigned	Unassigned	Unassigned	Unassigned	0	0.001	0	0	0	0	0	0	0	0	0	0	0	0.006	0	0	0	0	0	0	0	0
OTU560	-1.427	5.591	0.127559	0.445951	NotSig	Bacteria	Bacteroidetes	Unassigned	Unassigned	Unassigned	Unassigned	0	0.001	0	0	0	0	0	0	0	0	0	0	0	0.006	0	0	0	0	0	0	0	0
OTU944	-1.424	5.591	0.127889	0.445951	NotSig	Bacteria	Firmicutes	Clostridia	Clostridiales	Unassigned	Unassigned	0	0.001	0	0	0	0	0	0	0	0	0	0	0	0.003	0.003	0	0	0	0	0	0	0
OTU287	-1.423	5.591	0.127942	0.445951	NotSig	Bacteria	Unassigned	Unassigned	Unassigned	Unassigned	Unassigned	0	0.001	0	0	0	0	0	0	0	0	0	0	0	0.003	0	0	0	0	0	0	0	0.002
OTU1625	-1.421	5.59	0.128219	0.445951	NotSig	Bacteria	Firmicutes	Unassigned	Unassigned	Unassigned	Unassigned	0	0.001	0	0	0	0	0	0	0	0	0	0	0	0	0.005	0	0	0	0	0	0	0
OTU564	-1.421	5.59	0.128219	0.445951	NotSig	Bacteria	Bacteroidetes	Bacteroidia	Bacteroidales	Prevotellaceae	Prevotella	0	0.001	0	0	0	0	0	0	0	0	0	0	0	0	0.005	0	0	0	0	0	0	0
OTU1579	-1.42	5.59	0.128326	0.445951	NotSig	Bacteria	Firmicutes	Clostridia	Clostridiales	Ruminococcaceae	Ruminococcus	0	0	0	0	0	0	0	0	0	0	0	0	0	0	0	0	0	0	0	0	0	0.005
OTU215	-1.42	5.59	0.128326	0.445951	NotSig	Bacteria	Unassigned	Unassigned	Unassigned	Unassigned	Unassigned	0	0	0	0	0	0	0	0	0	0	0	0	0	0	0	0	0	0	0	0	0	0.005
OTU50	-1.859	8.408	0.128589	0.445981	NotSig	Bacteria	Bacteroidetes	Bacteroidia	Bacteroidales	Unassigned	Unassigned	0.013	0.049	0	0	0	0	0.011	0	0	0.051	0.067	0.004	0.052	0	0.024	0	0.003	0.237	0.005	0.002	0.004	0.161
OTU420	1.512	9.219	0.129084	0.446809	NotSig	Bacteria	Bacteroidetes	Bacteroidia	Bacteroidales	Prevotellaceae	Prevotella	0.083	0.03	0.108	0.259	0.389	0	0.013	0.008	0.015	0.022	0	0.018	0.003	0.049	0.171	0.003	0.003	0.002	0.002	0.008	0.042	0.016
OTU703	1.303	11.145	0.130124	0.449519	NotSig	Bacteria	Actinobacteria	Actinobacteria	Coriobacteriales	Coriobacteriaceae	Olsenella	0.314	0.135	0.033	0.349	0.009	1.023	0.113	1.045	0.043	0.317	0.196	0.012	0.033	0.006	0.077	0.021	0.068	0.872	0.103	0.022	0.031	0.116
OTU816	1.071	8.984	0.130731	0.449582	NotSig	Bacteria	Firmicutes	Clostridia	Clostridiales	Ruminococcaceae	Unassigned	0.065	0.03	0.115	0.092	0.029	0.019	0.17	0.023	0.068	0.041	0.052	0.044	0.027	0.026	0.055	0.01	0.123	0.005	0.028	0.006	0.011	0.009
OTU597	-1.934	5.789	0.131179	0.449582	NotSig	Bacteria	Bacteroidetes	Bacteroidia	Bacteroidales	Prevotellaceae	Prevotella	0	0.002	0	0	0	0	0	0.003	0	0	0	0	0.008	0	0.008	0	0	0.002	0	0	0	0
OTU526	-1.904	6.56	0.131211	0.449582	NotSig	Bacteria	Bacteroidetes	Bacteroidia	Bacteroidales	Prevotellaceae	Prevotella	0.002	0.009	0.002	0.01	0.004	0	0	0	0	0.004	0	0	0.003	0	0.074	0	0.003	0.002	0	0	0.004	0
OTU1459	2.022	6.387	0.131355	0.449582	NotSig	Bacteria	Firmicutes	Clostridia	Clostridiales	Eubacteriaceae	Eubacterium	0.007	0.001	0.007	0.007	0.007	0	0	0.003	0	0	0.042	0	0	0	0	0	0	0.011	0	0	0.002	0
OTU1356	-1.579	6.951	0.131428	0.449582	NotSig	Bacteria	Firmicutes	Clostridia	Clostridiales	Unassigned	Unassigned	0.004	0.011	0	0.005	0	0	0.005	0.003	0	0	0.025	0.002	0.005	0.003	0.003	0	0.005	0.018	0.035	0	0.002	0.041
OTU405	-1.698	12.161	0.132362	0.451893	NotSig	Bacteria	Bacteroidetes	Unassigned	Unassigned	Unassigned	Unassigned	0.2	0.588	0.139	0.07	1.292	0.089	0.047	0.003	0.086	0	0.062	0.213	0.057	0.046	0	2.607	0.044	0.032	0.014	2.881	0.197	0
OTU881	1.351	6.37	0.132988	0.453144	NotSig	Bacteria	Firmicutes	Clostridia	Clostridiales	Unassigned	Unassigned	0.005	0.002	0	0.002	0.002	0.005	0	0.003	0.013	0.02	0.005	0.004	0	0.006	0.003	0	0	0.005	0	0.002	0.004	0
OTU653	3.051	6.249	0.13345	0.453834	NotSig	Bacteria	Bacteroidetes	Bacteroidia	Bacteroidales	Porphyromonadaceae	Unassigned	0.005	0	0	0	0	0	0	0	0.049	0	0	0	0	0	0	0	0	0.005	0	0	0	0
OTU1117	1.154	6.983	0.134576	0.456257	NotSig	Bacteria	Firmicutes	Clostridia	Clostridiales	Unassigned	Unassigned	0.012	0.005	0.014	0.022	0.007	0.007	0.009	0.01	0.004	0.014	0	0.03	0.008	0.017	0.005	0.003	0.005	0.007	0	0.006	0	0
OTU31	-1.077	11.885	0.134685	0.456257	NotSig	Bacteria	Bacteroidetes	Bacteroidia	Bacteroidales	Prevotellaceae	Prevotella	0.254	0.546	0.299	0.107	0.13	0.08	0.654	0.403	0.039	0.477	0.255	0.095	0.341	0.553	2.369	0.191	0.612	0.951	0.04	0.202	0.15	0.05
OTU931	-1.542	5.819	0.135184	0.457062	NotSig	Bacteria	Firmicutes	Clostridia	Clostridiales	Ruminococcaceae	Unassigned	0	0.002	0	0.002	0	0	0	0	0	0.002	0	0	0.003	0.009	0.003	0	0	0	0	0.002	0.002	0
OTU574	-1.784	6.243	0.13668	0.458444	NotSig	Bacteria	Bacteroidetes	Bacteroidia	Bacteroidales	Prevotellaceae	Prevotella	0.001	0.005	0.007	0	0	0	0	0.003	0	0.004	0	0	0.011	0.003	0.032	0.005	0	0	0	0	0.002	0
OTU274	1.884	6.63	0.136842	0.458444	NotSig	Bacteria	Firmicutes	Bacilli	Lactobacillales	Lactobacillaceae	Lactobacillus	0.008	0.002	0.002	0.002	0.002	0	0	0	0.039	0	0	0.032	0	0	0	0	0	0	0.002	0.004	0.007	0.005
OTU402	1.361	9.647	0.136956	0.458444	NotSig	Bacteria	Bacteroidetes	Bacteroidia	Bacteroidales	Bacteroidaceae	Bacteroides	0.101	0.044	0.105	0.058	0.24	0.548	0.004	0.008	0	0.008	0.032	0.002	0.049	0.084	0.106	0.034	0.082	0.014	0.007	0.014	0.046	0.005
OTU111	1.461	7.967	0.137023	0.458444	NotSig	Bacteria	Firmicutes	Negativicutes	Selenomonadales	Veillonellaceae	Selenomonas	0.033	0.011	0.105	0.002	0.011	0.028	0.043	0.01	0	0.073	0.05	0.004	0.014	0.006	0.018	0.003	0.005	0	0	0	0	0.064
OTU233	-1.338	5.582	0.137428	0.458444	NotSig	Bacteria	Unassigned	Unassigned	Unassigned	Unassigned	Unassigned	0	0	0	0	0	0	0	0	0	0	0	0	0	0	0	0	0	0.005	0	0	0	0
OTU514	-1.338	5.582	0.137428	0.458444	NotSig	Bacteria	Bacteroidetes	Bacteroidia	Bacteroidales	Prevotellaceae	Prevotella	0	0	0	0	0	0	0	0	0	0	0	0	0	0	0	0	0	0.005	0	0	0	0
OTU913	-1.338	5.582	0.137428	0.458444	NotSig	Bacteria	Firmicutes	Unassigned	Unassigned	Unassigned	Unassigned	0	0	0	0	0	0	0	0	0	0	0	0	0	0	0	0	0	0.005	0	0	0	0
OTU635	-1.389	7.748	0.137973	0.459383	NotSig	Bacteria	Bacteroidetes	Unassigned	Unassigned	Unassigned	Unassigned	0.01	0.024	0.036	0	0.004	0	0.018	0.008	0	0	0.035	0	0.035	0	0.026	0.024	0.011	0.054	0.028	0.03	0.004	0.027
OTU367	-1.274	8.326	0.139318	0.462687	NotSig	Bacteria	Bacteroidetes	Bacteroidia	Bacteroidales	Prevotellaceae	Unassigned	0.017	0.04	0.007	0.019	0.013	0.016	0	0.015	0	0.079	0.015	0.004	0.025	0.104	0.024	0.01	0.142	0.005	0.063	0.002	0.018	0.007
OTU867	-1.159	7.887	0.139494	0.462687	NotSig	Bacteria	Firmicutes	Clostridia	Clostridiales	Lachnospiraceae	Unassigned	0.012	0.026	0.031	0.002	0.009	0	0.02	0.01	0	0.016	0.01	0.026	0.008	0.058	0.026	0.047	0.014	0.005	0.002	0.053	0.018	0.025
OTU44	1.09	15.786	0.140779	0.466064	NotSig	Bacteria	Bacteroidetes	Bacteroidia	Bacteroidales	Porphyromonadaceae	Unassigned	7.47	3.569	5.716	2.331	2.59	7.516	19.521	3.138	21.903	1.648	9.117	1.215	5.102	0.856	0.528	0.465	1.537	14.104	3.391	1.122	6.1	2.481
OTU1295	-1.659	6.248	0.141244	0.46672	NotSig	Bacteria	Firmicutes	Clostridia	Clostridiales	Lachnospiraceae	Unassigned	0.001	0.005	0.002	0	0	0	0.002	0.01	0	0	0	0	0.014	0	0.005	0.003	0	0.025	0	0.002	0	0.002
OTU18	1.979	7.428	0.141544	0.466827	NotSig	Bacteria	Firmicutes	Negativicutes	Selenomonadales	Veillonellaceae	Unassigned	0.021	0.005	0.055	0.012	0.002	0	0	0	0	0	0	0.141	0.003	0	0	0.016	0	0.005	0	0.01	0	0.014
OTU483	-1.756	6.033	0.141938	0.467245	NotSig	Bacteria	Bacteroidetes	Bacteroidia	Bacteroidales	Unassigned	Unassigned	0.001	0.004	0	0	0	0	0.004	0	0	0.004	0	0	0.016	0.012	0	0	0.003	0	0	0	0.002	0.002
OTU874	1.653	5.894	0.143228	0.469907	NotSig	Bacteria	Firmicutes	Clostridia	Clostridiales	Ruminococcaceae	Unassigned	0.002	0.001	0	0.012	0	0.005	0.002	0.003	0	0	0	0.002	0	0.003	0	0	0	0	0	0	0.002	0
OTU594	-1.917	5.924	0.143284	0.469907	NotSig	Bacteria	Bacteroidetes	Bacteroidia	Bacteroidales	Prevotellaceae	Prevotella	0.001	0.003	0	0	0	0	0	0.005	0	0	0	0	0.005	0	0.011	0.003	0	0.009	0	0	0	0
OTU109	-1.248	8.895	0.144895	0.474302	NotSig	Bacteria	Unassigned	Unassigned	Unassigned	Unassigned	Unassigned	0.027	0.063	0.01	0.068	0.007	0.002	0.002	0.089	0.023	0.006	0.055	0.008	0.011	0.017	0.04	0.005	0.011	0.329	0.089	0.004	0.009	0.111
OTU489	-1.69	6.179	0.146156	0.477535	NotSig	Bacteria	Bacteroidetes	Bacteroidia	Bacteroidales	Bacteroidaceae	Bacteroides	0.001	0.004	0	0.005	0.004	0	0	0	0.002	0	0	0	0	0.02	0.003	0.01	0	0	0	0.008	0	0.002
OTU471	-1.303	7.042	0.147173	0.477602	NotSig	Bacteria	Bacteroidetes	Bacteroidia	Bacteroidales	Bacteroidaceae	Bacteroides	0.005	0.012	0.007	0.007	0.011	0.005	0	0.008	0.004	0.006	0	0.002	0.008	0.02	0.029	0.031	0.003	0	0	0.028	0.002	0
OTU966	1.674	5.766	0.147582	0.477602	NotSig	Bacteria	Firmicutes	Clostridia	Clostridiales	Ruminococcaceae	Unassigned	0.001	0	0	0	0.002	0	0.005	0	0	0	0.002	0.004	0	0	0	0	0	0	0	0	0.002	0
OTU1373	1.45	5.6	0.147732	0.477602	NotSig	Bacteria	Firmicutes	Clostridia	Clostridiales	Lachnospiraceae	Clostridium_XlVa	0	0	0	0	0	0.005	0	0	0	0	0	0	0	0	0	0	0	0	0	0	0	0
OTU407	1.45	5.6	0.147732	0.477602	NotSig	Bacteria	Bacteroidetes	Unassigned	Unassigned	Unassigned	Unassigned	0	0	0	0	0	0.005	0	0	0	0	0	0	0	0	0	0	0	0	0	0	0	0
OTU1313	-1.792	5.757	0.147756	0.477602	NotSig	Bacteria	Firmicutes	Clostridia	Clostridiales	Unassigned	Unassigned	0	0.002	0	0	0	0	0	0	0.002	0	0	0	0	0.009	0	0.005	0	0	0	0	0	0.002
OTU862	-1.185	7.829	0.148383	0.477602	NotSig	Bacteria	Firmicutes	Clostridia	Clostridiales	Unassigned	Unassigned	0.011	0.025	0.019	0.002	0.016	0	0.013	0.01	0.023	0.018	0.007	0.004	0	0	0.026	0.008	0.071	0.02	0.033	0.008	0.013	0.066
OTU789	1.121	10.742	0.149119	0.477602	NotSig	Bacteria	Firmicutes	Clostridia	Clostridiales	Ruminococcaceae	Unassigned	0.23	0.1	0.531	0	0.281	0.307	0.289	0.269	0.331	0.179	0.084	0.034	0.117	0.017	0.103	0.018	0.025	0.178	0.009	0.065	0.257	0.211
OTU1077	-1.958	5.897	0.149316	0.477602	NotSig	Bacteria	Firmicutes	Clostridia	Clostridiales	Unassigned	Unassigned	0	0.003	0	0.002	0	0	0.002	0	0	0	0	0	0.003	0	0	0	0	0.02	0	0	0.002	0
OTU1701	-1.528	6.155	0.14961	0.477602	NotSig	Bacteria	Actinobacteria	Actinobacteria	Coriobacteriales	Coriobacteriaceae	Unassigned	0.001	0.004	0	0	0.004	0	0	0	0	0	0.007	0	0.005	0.006	0	0.003	0.003	0	0	0.008	0.009	0.002
OTU364	1.126	13.893	0.150107	0.477602	NotSig	Bacteria	Bacteroidetes	Bacteroidia	Bacteroidales	Porphyromonadaceae	Unassigned	1.917	0.987	0.646	1.39	1.168	11.598	1.836	0.72	0.351	0.67	0.037	0.758	2.615	1.945	1.451	1.109	0.303	0.59	0.082	0.697	0.913	0.166
OTU863	1.502	6.541	0.150326	0.477602	NotSig	Bacteria	Unassigned	Unassigned	Unassigned	Unassigned	Unassigned	0.007	0.002	0.005	0	0	0.005	0.018	0.005	0.009	0	0.027	0.002	0	0.009	0	0	0.003	0	0.002	0	0.009	0
OTU1270	-1.09	10.663	0.151724	0.477602	NotSig	Bacteria	Firmicutes	Clostridia	Clostridiales	Unassigned	Unassigned	0.106	0.2	0.045	0.114	0.007	0.007	0.043	0.211	0.013	0.061	0.491	0.066	0.087	0.164	0.103	0.06	0.301	0.171	0.695	0.125	0.046	0.252
OTU29	-1.181	12.307	0.1529	0.477602	NotSig	Bacteria	Bacteroidetes	Bacteroidia	Bacteroidales	Prevotellaceae	Prevotella	0.335	0.648	0.725	0.642	0.434	0.002	0.081	0.167	0.034	0.844	0.05	0.368	1.313	0.026	0.393	2.136	0.227	0.221	0.054	1.767	0.263	0.084
OTU222	-2.32	5.884	0.15296	0.477602	NotSig	Bacteria	Proteobacteria	Betaproteobacteria	Burkholderiales	Unassigned	Unassigned	0	0.003	0	0	0	0.002	0	0	0	0	0	0	0	0.023	0	0.005	0	0	0	0	0	0
OTU145	-1.822	7.324	0.153167	0.477602	NotSig	Bacteria	Unassigned	Unassigned	Unassigned	Unassigned	Unassigned	0.006	0.018	0.002	0.048	0.004	0	0	0	0	0	0	0	0	0.009	0.003	0.003	0.008	0.056	0.009	0	0	0.095
OTU100	1.402	5.594	0.153281	0.477602	NotSig	Bacteria	Proteobacteria	Deltaproteobacteria	Desulfovibrionales	Desulfovibrionaceae	Unassigned	0	0	0	0	0.004	0	0	0	0	0	0	0	0	0	0	0	0	0	0	0	0	0
OTU1083	1.402	5.594	0.153281	0.477602	NotSig	Bacteria	Firmicutes	Clostridia	Clostridiales	Clostridiaceae_1	Clostridium_sensu_stricto	0	0	0	0	0.004	0	0	0	0	0	0	0	0	0	0	0	0	0	0	0	0	0
OTU1084	1.402	5.594	0.153281	0.477602	NotSig	Bacteria	Firmicutes	Clostridia	Clostridiales	Ruminococcaceae	Unassigned	0	0	0	0	0.004	0	0	0	0	0	0	0	0	0	0	0	0	0	0	0	0	0
OTU1247	1.402	5.594	0.153281	0.477602	NotSig	Bacteria	Firmicutes	Clostridia	Clostridiales	Ruminococcaceae	Unassigned	0	0	0	0	0.004	0	0	0	0	0	0	0	0	0	0	0	0	0	0	0	0	0
OTU1737	1.402	5.594	0.153281	0.477602	NotSig	Bacteria	Firmicutes	Clostridia	Clostridiales	Lachnospiraceae	Unassigned	0	0	0	0	0.004	0	0	0	0	0	0	0	0	0	0	0	0	0	0	0	0	0
OTU318	1.402	5.594	0.153281	0.477602	NotSig	Bacteria	Proteobacteria	Deltaproteobacteria	Desulfovibrionales	Desulfovibrionaceae	Desulfovibrio	0	0	0	0	0.004	0	0	0	0	0	0	0	0	0	0	0	0	0	0	0	0	0
OTU319	1.402	5.594	0.153281	0.477602	NotSig	Bacteria	Unassigned	Unassigned	Unassigned	Unassigned	Unassigned	0	0	0	0	0.004	0	0	0	0	0	0	0	0	0	0	0	0	0	0	0	0	0
OTU323	1.402	5.594	0.153281	0.477602	NotSig	Bacteria	Proteobacteria	Betaproteobacteria	Rhodocyclales	Rhodocyclaceae	Zoogloea	0	0	0	0	0.004	0	0	0	0	0	0	0	0	0	0	0	0	0	0	0	0	0
OTU616	1.402	5.594	0.153281	0.477602	NotSig	Bacteria	Bacteroidetes	Sphingobacteriia	Sphingobacteriales	Chitinophagaceae	Unassigned	0	0	0	0	0.004	0	0	0	0	0	0	0	0	0	0	0	0	0	0	0	0	0
OTU619	1.402	5.594	0.153281	0.477602	NotSig	Bacteria	Bacteroidetes	Flavobacteriia	Flavobacteriales	Flavobacteriaceae	Chryseobacterium	0	0	0	0	0.004	0	0	0	0	0	0	0	0	0	0	0	0	0	0	0	0	0
OTU620	1.402	5.594	0.153281	0.477602	NotSig	Bacteria	Bacteroidetes	Bacteroidia	Bacteroidales	Porphyromonadaceae	Paludibacter	0	0	0	0	0.004	0	0	0	0	0	0	0	0	0	0	0	0	0	0	0	0	0
OTU636	-1.408	7.969	0.154424	0.478077	NotSig	Bacteria	Bacteroidetes	Bacteroidia	Bacteroidales	Prevotellaceae	Unassigned	0.012	0.032	0.045	0.017	0.004	0.016	0	0.008	0.011	0.01	0.005	0.002	0.126	0	0.161	0.016	0.005	0.005	0	0.01	0	0.002
OTU1372	1.386	5.593	0.155263	0.478077	NotSig	Bacteria	Firmicutes	Clostridia	Clostridiales	Unassigned	Unassigned	0	0	0	0	0	0.002	0	0	0.002	0	0	0	0	0	0	0	0	0	0	0	0	0
OTU1092	1.384	5.592	0.15536	0.478077	NotSig	Bacteria	Firmicutes	Clostridia	Clostridiales	Unassigned	Unassigned	0	0	0	0	0	0	0	0	0	0	0.005	0	0	0	0	0	0	0	0	0	0	0
OTU1671	1.384	5.592	0.15536	0.478077	NotSig	Bacteria	Firmicutes	Clostridia	Clostridiales	Clostridiaceae_1	Clostridium_sensu_stricto	0	0	0	0	0	0	0	0	0	0	0.005	0	0	0	0	0	0	0	0	0	0	0
OTU1672	1.384	5.592	0.15536	0.478077	NotSig	Bacteria	Firmicutes	Clostridia	Clostridiales	Unassigned	Unassigned	0	0	0	0	0	0	0	0	0	0	0.005	0	0	0	0	0	0	0	0	0	0	0
OTU500	1.382	5.592	0.155602	0.478077	NotSig	Bacteria	Bacteroidetes	Bacteroidia	Bacteroidales	Porphyromonadaceae	Unassigned	0.001	0	0	0	0	0	0	0.003	0	0	0.002	0	0	0	0	0	0	0	0	0	0	0
OTU102	1.38	5.592	0.155844	0.478077	NotSig	Bacteria	Proteobacteria	Gammaproteobacteria	Pseudomonadales	Moraxellaceae	Moraxella	0.001	0	0	0	0	0	0	0.005	0	0	0	0	0	0	0	0	0	0	0	0	0	0
OTU784	1.38	5.592	0.155844	0.478077	NotSig	Bacteria	Firmicutes	Clostridia	Unassigned	Unassigned	Unassigned	0.001	0	0	0	0	0	0	0.005	0	0	0	0	0	0	0	0	0	0	0	0	0	0
OTU369	-1.407	9.747	0.155895	0.478077	NotSig	Bacteria	Bacteroidetes	Bacteroidia	Bacteroidales	Prevotellaceae	Prevotella	0.047	0.128	0.007	0	0.004	0.016	0.004	0.307	0	0.11	0.02	0.004	0.453	0.158	0.098	0.042	0.016	0.426	0.007	0.069	0.004	0.002
OTU130	-1.438	7.232	0.156491	0.478758	NotSig	Bacteria	Firmicutes	Negativicutes	Selenomonadales	Veillonellaceae	Veillonella	0.006	0.017	0.041	0	0	0	0.004	0	0	0.002	0.017	0	0.016	0.092	0.032	0.005	0.011	0.007	0.002	0.004	0.002	0.002
OTU1199	-1.38	10.706	0.156965	0.478758	NotSig	Bacteria	Firmicutes	Clostridia	Clostridiales	Lachnospiraceae	Unassigned	0.09	0.246	0.091	0.017	0.007	0.246	0.002	0.183	0.004	0.045	0.186	0.117	0.382	0	0.047	0	0.301	1.282	0.285	0.004	0.009	0.15
OTU1354	-1.2	7.838	0.157079	0.478758	NotSig	Bacteria	Firmicutes	Clostridia	Clostridiales	Lachnospiraceae	Unassigned	0.012	0.025	0.01	0.034	0.002	0.005	0.034	0.005	0.002	0	0.012	0.012	0.033	0.006	0	0.063	0.06	0.02	0.023	0.018	0.027	0
OTU577	1.644	9.048	0.15727	0.478758	NotSig	Bacteria	Bacteroidetes	Bacteroidia	Bacteroidales	Prevotellaceae	Unassigned	0.084	0.023	0.072	0.721	0.011	0.016	0	0.01	0	0	0.002	0.008	0	0.037	0.021	0	0.098	0.002	0.037	0	0.022	0.011
OTU1163	1.651	5.746	0.157486	0.478758	NotSig	Bacteria	Firmicutes	Clostridia	Clostridiales	Ruminococcaceae	Unassigned	0.001	0	0	0.007	0	0.002	0	0.003	0.002	0	0	0	0	0	0	0	0	0.002	0	0	0	0
OTU27	1.027	12.435	0.158395	0.479825	NotSig	Bacteria	Bacteroidetes	Unassigned	Unassigned	Unassigned	Unassigned	0.799	0.385	0.143	3.779	0.049	0.087	0.554	0.883	0.21	0.826	0.233	1.225	0.743	0.643	0.963	0.167	0.252	0.394	0.136	0.121	0.06	0.374
OTU1690	1.203	6.198	0.15886	0.479825	NotSig	Bacteria	Firmicutes	Clostridia	Clostridiales	Ruminococcaceae	Unassigned	0.004	0.001	0.01	0.007	0	0.002	0.002	0.003	0.006	0.006	0	0.006	0	0	0.003	0	0.003	0	0.005	0	0.004	0
OTU1713	1.926	5.804	0.158931	0.479825	NotSig	Bacteria	Firmicutes	Clostridia	Clostridiales	Ruminococcaceae	Unassigned	0.002	0	0	0.012	0	0	0	0	0.002	0	0.005	0	0	0	0	0.003	0	0	0	0	0	0
OTU1736	1.356	5.589	0.158935	0.479825	NotSig	Bacteria	Firmicutes	Clostridia	Clostridiales	Clostridiales_Incertae_Sedis_XI	Helcococcus	0	0	0	0.002	0.002	0	0	0	0	0	0	0	0	0	0	0	0	0	0	0	0	0
OTU125	1.347	5.588	0.159986	0.480124	NotSig	Bacteria	Firmicutes	Negativicutes	Selenomonadales	Veillonellaceae	Megasphaera	0	0	0	0.002	0	0	0	0	0	0	0.002	0	0	0	0	0	0	0	0	0	0	0
OTU800	1.345	5.588	0.16023	0.480124	NotSig	Bacteria	Firmicutes	Unassigned	Unassigned	Unassigned	Unassigned	0	0	0	0.002	0	0	0	0.003	0	0	0	0	0	0	0	0	0	0	0	0	0	0
OTU754	2.306	7.409	0.160241	0.480124	NotSig	Bacteria	Actinobacteria	Actinobacteria	Coriobacteriales	Coriobacteriaceae	Olsenella	0.021	0.004	0	0.002	0	0	0.002	0.005	0	0	0.206	0	0	0	0	0	0	0.02	0	0	0.018	0
OTU312	1.344	5.588	0.16028	0.480124	NotSig	Bacteria	Firmicutes	Bacilli	Lactobacillales	Lactobacillaceae	Lactobacillus	0	0	0	0	0	0	0	0	0	0	0.002	0.002	0	0	0	0	0	0	0	0	0	0
OTU1502	-1.15	9.805	0.160407	0.480124	NotSig	Bacteria	Firmicutes	Clostridia	Clostridiales	Lachnospiraceae	Blautia	0.055	0.117	0.026	0.015	0.004	0.002	0.111	0.081	0.015	0.099	0.171	0.028	0.052	0.003	0.053	0.013	0.112	0.388	0.182	0.012	0.029	0.324
OTU1004	1.334	5.587	0.161791	0.483356	NotSig	Bacteria	Unassigned	Unassigned	Unassigned	Unassigned	Unassigned	0	0	0.002	0	0.002	0	0	0	0	0	0	0	0	0	0	0	0	0	0	0	0	0
OTU1362	-1.225	7.165	0.16204	0.483356	NotSig	Bacteria	Firmicutes	Clostridia	Clostridiales	Lachnospiraceae	Blautia	0.006	0.014	0.002	0.022	0.004	0	0.009	0.005	0	0.002	0.015	0.002	0.019	0.003	0.005	0.005	0.014	0.056	0.023	0	0	0.016
OTU1670	1.323	5.586	0.162907	0.483961	NotSig	Bacteria	Firmicutes	Clostridia	Clostridiales	Lachnospiraceae	Unassigned	0	0	0	0	0	0	0	0	0.004	0	0	0	0	0	0	0	0	0	0	0	0	0
OTU271	1.323	5.586	0.163094	0.483961	NotSig	Bacteria	Proteobacteria	Betaproteobacteria	Neisseriales	Neisseriaceae	Neisseria	0	0	0.002	0	0	0	0	0.003	0	0	0	0	0	0	0	0	0	0	0	0	0	0
OTU327	1.93	6.09	0.164087	0.483961	NotSig	Bacteria	Firmicutes	Negativicutes	Selenomonadales	Acidaminococcaceae	Succiniclasticum	0.004	0.001	0.007	0	0.004	0	0	0.028	0	0	0	0	0	0	0.003	0.003	0	0	0	0.002	0	0
OTU1251	1.786	5.937	0.164092	0.483961	NotSig	Bacteria	Firmicutes	Clostridia	Clostridiales	Ruminococcaceae	Unassigned	0.002	0	0.002	0	0	0.014	0	0	0	0.006	0	0.002	0	0	0	0	0.003	0	0	0.002	0	0
OTU1241	1.309	5.584	0.164656	0.483961	NotSig	Bacteria	Firmicutes	Clostridia	Clostridiales	Unassigned	Unassigned	0	0	0	0.005	0	0	0	0	0	0	0	0	0	0	0	0	0	0	0	0	0	0
OTU1665	1.307	5.584	0.164954	0.483961	NotSig	Bacteria	Firmicutes	Clostridia	Clostridiales	Unassigned	Unassigned	0	0	0	0.002	0	0	0	0	0	0	0	0.002	0	0	0	0	0	0	0	0	0	0
OTU947	1.384	5.933	0.165009	0.483961	NotSig	Bacteria	Firmicutes	Clostridia	Clostridiales	Unassigned	Unassigned	0.003	0.001	0.005	0.012	0.002	0	0	0.003	0	0.002	0.002	0	0.003	0.003	0	0	0	0.002	0	0	0	0
OTU1243	1.305	5.584	0.165251	0.483961	NotSig	Bacteria	Firmicutes	Clostridia	Clostridiales	Unassigned	Unassigned	0	0	0	0	0	0	0	0	0	0	0	0.004	0	0	0	0	0	0	0	0	0	0
OTU452	1.305	5.584	0.165251	0.483961	NotSig	Bacteria	Bacteroidetes	Bacteroidia	Bacteroidales	Prevotellaceae	Prevotella	0	0	0	0	0	0	0	0	0	0	0	0.004	0	0	0	0	0	0	0	0	0	0
OTU664	1.305	5.584	0.165251	0.483961	NotSig	Bacteria	Bacteroidetes	Bacteroidia	Bacteroidales	Unassigned	Unassigned	0	0	0	0	0	0	0	0	0	0	0	0.004	0	0	0	0	0	0	0	0	0	0
OTU1034	1.237	9.734	0.165289	0.483961	NotSig	Bacteria	Firmicutes	Clostridia	Clostridiales	Lachnospiraceae	Unassigned	0.121	0.05	0.079	0.571	0.009	0.054	0.004	0.013	0.154	0.187	0.01	0.131	0.011	0.216	0.092	0.003	0.027	0	0.014	0.002	0.088	0.05
OTU1195	-2.14	8.562	0.165605	0.484077	NotSig	Bacteria	Firmicutes	Clostridia	Clostridiales	Lachnospiraceae	Unassigned	0.013	0.045	0.029	0.005	0	0	0	0	0	0	0.067	0.028	0	0	0	0.18	0	0	0	0.224	0.049	0
OTU1028	1.298	5.583	0.166402	0.485555	NotSig	Bacteria	Unassigned	Unassigned	Unassigned	Unassigned	Unassigned	0	0	0	0	0	0	0.002	0.003	0	0	0	0	0	0	0	0	0	0	0	0	0	0
OTU943	1.294	5.583	0.166667	0.485555	NotSig	Bacteria	Firmicutes	Clostridia	Clostridiales	Ruminococcaceae	Unassigned	0	0	0.002	0	0	0	0	0	0.002	0	0	0	0	0	0	0	0	0	0	0	0	0
OTU1702	1.449	5.852	0.167216	0.485748	NotSig	Bacteria	Firmicutes	Clostridia	Clostridiales	Ruminococcaceae	Unassigned	0.002	0	0	0.005	0.002	0	0.005	0	0	0.002	0.005	0	0	0	0	0.003	0	0	0	0	0.002	0
OTU1654	-1.673	6.065	0.16748	0.485748	NotSig	Bacteria	Firmicutes	Clostridia	Clostridiales	Lachnospiraceae	Unassigned	0.001	0.003	0	0	0	0	0	0	0	0	0.002	0.006	0	0.003	0.005	0	0.005	0	0.014	0	0	0.005
OTU924	-1.658	6.064	0.167847	0.485748	NotSig	Bacteria	Firmicutes	Clostridia	Clostridiales	Unassigned	Unassigned	0.001	0.003	0	0.002	0.002	0	0	0	0	0	0	0.004	0	0.009	0	0.008	0	0	0	0.01	0.004	0
OTU1287	-1.96	7.16	0.168561	0.485748	NotSig	Bacteria	Unassigned	Unassigned	Unassigned	Unassigned	Unassigned	0.004	0.014	0	0.005	0	0	0.025	0	0	0	0.007	0.002	0.003	0	0	0	0.055	0	0.082	0	0	0.002
OTU155	-2.179	6.249	0.169551	0.485748	NotSig	Bacteria	Proteobacteria	Betaproteobacteria	Burkholderiales	Unassigned	Unassigned	0.001	0.006	0	0	0	0	0	0.005	0	0	0.002	0.002	0	0	0.055	0	0	0.002	0	0	0	0
OTU1177	1.559	5.744	0.16974	0.485748	NotSig	Bacteria	Firmicutes	Clostridia	Clostridiales	Ruminococcaceae	Unassigned	0.001	0	0.002	0	0	0.002	0.004	0	0	0	0.005	0	0	0	0	0.003	0	0	0	0	0	0
OTU1046	-1.56	5.831	0.169884	0.485748	NotSig	Bacteria	Firmicutes	Clostridia	Clostridiales	Lachnospiraceae	Clostridium_XlVb	0	0.002	0	0	0	0	0	0	0	0.002	0.002	0	0.003	0	0	0	0.008	0.002	0.005	0	0	0
OTU1094	-1.002	9.233	0.169957	0.485748	NotSig	Bacteria	Candidatus_Saccharibacteria	Unassigned	Unassigned	Unassigned	Saccharibacteria_genera_incertae_sedis	0.037	0.076	0.012	0.022	0.011	0.026	0.016	0.112	0.041	0.026	0.079	0.03	0.019	0.098	0.108	0.018	0.005	0.151	0.056	0.02	0.02	0.263
OTU565	-1.816	6.223	0.170263	0.485748	NotSig	Bacteria	Bacteroidetes	Bacteroidia	Bacteroidales	Prevotellaceae	Prevotella	0.001	0.005	0.002	0.002	0.004	0	0	0.003	0	0	0	0	0.033	0.003	0.016	0	0	0	0	0	0	0
OTU1486	1.803	5.764	0.170379	0.485748	NotSig	Bacteria	Actinobacteria	Actinobacteria	Coriobacteriales	Coriobacteriaceae	Unassigned	0.002	0	0	0	0	0	0.002	0	0.002	0.012	0	0	0	0	0	0	0	0.002	0	0	0	0
OTU1528	1.265	5.58	0.170458	0.485748	NotSig	Bacteria	Firmicutes	Clostridia	Clostridiales	Ruminococcaceae	Clostridium_IV	0	0	0.005	0	0	0	0	0	0	0	0	0	0	0	0	0	0	0	0	0	0	0
OTU1080	1.263	5.58	0.170889	0.485748	NotSig	Bacteria	Firmicutes	Clostridia	Clostridiales	Unassigned	Unassigned	0	0	0	0.002	0	0	0.002	0	0	0	0	0	0	0	0	0	0	0	0	0	0	0
OTU1245	1.263	5.58	0.170889	0.485748	NotSig	Bacteria	Firmicutes	Clostridia	Clostridiales	Ruminococcaceae	Unassigned	0	0	0	0.002	0	0	0.002	0	0	0	0	0	0	0	0	0	0	0	0	0	0	0
OTU1594	1.263	5.58	0.170889	0.485748	NotSig	Bacteria	Firmicutes	Clostridia	Clostridiales	Eubacteriaceae	Anaerofustis	0	0	0	0.002	0	0	0.002	0	0	0	0	0	0	0	0	0	0	0	0	0	0	0
OTU1432	-1.217	7.339	0.171161	0.485748	NotSig	Bacteria	Firmicutes	Clostridia	Clostridiales	Unassigned	Unassigned	0.007	0.017	0	0.002	0.002	0.002	0.018	0.005	0.017	0.012	0.005	0.004	0.041	0.037	0.005	0.047	0.003	0	0	0.028	0.002	0.002
OTU53	-1.758	9.132	0.171748	0.485748	NotSig	Bacteria	Spirochaetes	Spirochaetia	Spirochaetales	Spirochaetaceae	Treponema	0.024	0.068	0.005	0.002	0.013	0	0.151	0	0.006	0	0.01	0.048	0.005	0	0	0.238	0	0.002	0	0.172	0.265	0
OTU681	-1.193	7.793	0.171848	0.485748	NotSig	Bacteria	Bacteroidetes	Bacteroidia	Bacteroidales	Porphyromonadaceae	Unassigned	0.011	0.027	0.014	0.005	0.002	0.007	0.023	0.003	0.006	0.016	0.02	0.014	0.014	0.17	0.008	0.008	0	0.016	0	0	0.027	0.032
OTU1374	-1.326	6.652	0.171946	0.485748	NotSig	Bacteria	Firmicutes	Clostridia	Clostridiales	Lachnospiraceae	Unassigned	0.003	0.008	0	0.002	0	0	0.009	0	0.002	0	0	0.016	0.003	0.003	0.008	0.021	0.014	0	0.002	0.018	0.002	0.005
OTU437	0.969	7.242	0.17216	0.485748	NotSig	Bacteria	Bacteroidetes	Unassigned	Unassigned	Unassigned	Unassigned	0.014	0.007	0.007	0.005	0.029	0.014	0.025	0.025	0.002	0.018	0.007	0.008	0.011	0.006	0.005	0.018	0.005	0.005	0	0.008	0.009	0.002
OTU113	1.628	7.64	0.17229	0.485748	NotSig	Bacteria	Spirochaetes	Spirochaetia	Spirochaetales	Spirochaetaceae	Treponema	0.024	0.007	0.002	0.01	0.027	0.014	0.002	0	0	0.093	0.037	0.054	0.03	0	0	0	0	0	0	0.002	0.035	0
OTU236	-1.66	5.73	0.173903	0.487054	NotSig	Bacteria	Unassigned	Unassigned	Unassigned	Unassigned	Unassigned	0	0.001	0.002	0	0	0	0	0	0	0	0	0	0.008	0.003	0	0	0	0	0	0.002	0	0
OTU135	-1.969	6.948	0.17515	0.487054	NotSig	Bacteria	Unassigned	Unassigned	Unassigned	Unassigned	Unassigned	0.003	0.012	0.002	0	0	0	0	0	0	0	0.007	0.02	0	0	0.011	0.008	0	0	0	0	0.007	0.098
OTU375	0.969	9.048	0.175182	0.487054	NotSig	Bacteria	Bacteroidetes	Unassigned	Unassigned	Unassigned	Unassigned	0.062	0.033	0.017	0.039	0.018	0.009	0.048	0.091	0.261	0.035	0.017	0.08	0.038	0.02	0.092	0.021	0.019	0.05	0.037	0.026	0.013	0.011
OTU970	-1.698	5.843	0.175294	0.487054	NotSig	Bacteria	Firmicutes	Unassigned	Unassigned	Unassigned	Unassigned	0	0.002	0	0	0	0	0.002	0	0	0	0	0.002	0.008	0.009	0.005	0	0	0	0	0	0	0
OTU195	1.894	6.235	0.175511	0.487054	NotSig	Bacteria	Firmicutes	Negativicutes	Selenomonadales	Veillonellaceae	Mitsuokella	0.005	0.001	0	0	0	0.012	0.009	0	0	0	0.025	0.002	0	0	0	0	0	0.009	0	0	0	0.002
OTU1075	1.117	9.041	0.175654	0.487054	NotSig	Bacteria	Firmicutes	Clostridia	Clostridiales	Unassigned	Unassigned	0.066	0.026	0.091	0.063	0.067	0.014	0.115	0.01	0.193	0.037	0.059	0.006	0	0.052	0.003	0.026	0.003	0.014	0.005	0.103	0.04	0.018
OTU1284	-2.123	6.406	0.176	0.487054	NotSig	Bacteria	Firmicutes	Clostridia	Clostridiales	Ruminococcaceae	Ruminococcus	0.001	0.007	0	0	0	0.009	0	0.003	0	0	0	0	0	0	0.034	0	0	0.005	0	0	0	0.029
OTU940	-1.264	6.17	0.176111	0.487054	NotSig	Bacteria	Firmicutes	Clostridia	Clostridiales	Unassigned	Unassigned	0.001	0.004	0.002	0.005	0.002	0	0.005	0	0	0	0	0	0.003	0.014	0	0.003	0.005	0	0.002	0.004	0.007	0
OTU1314	-1.672	5.739	0.176317	0.487054	NotSig	Bacteria	Unassigned	Unassigned	Unassigned	Unassigned	Unassigned	0	0.001	0	0.002	0	0	0	0	0	0	0	0	0	0	0.003	0	0.008	0	0	0.002	0	0
OTU1091	1.218	5.575	0.176966	0.487054	NotSig	Bacteria	Unassigned	Unassigned	Unassigned	Unassigned	Unassigned	0	0	0	0	0	0	0	0	0	0.004	0	0	0	0	0	0	0	0	0	0	0	0
OTU1549	-1.784	5.873	0.176997	0.487054	NotSig	Bacteria	Firmicutes	Clostridia	Clostridiales	Lachnospiraceae	Unassigned	0	0.002	0	0	0	0	0.002	0	0	0	0.002	0	0.003	0	0	0	0.011	0	0.007	0	0	0
OTU1609	1.217	5.575	0.177089	0.487054	NotSig	Bacteria	Firmicutes	Clostridia	Clostridiales	Ruminococcaceae	Unassigned	0	0	0	0	0	0	0.002	0	0	0.002	0	0	0	0	0	0	0	0	0	0	0	0
OTU101	1.216	5.575	0.177212	0.487054	NotSig	Bacteria	Firmicutes	Bacilli	Bacillales	Bacillaceae_2	Unassigned	0	0	0	0	0	0	0.004	0	0	0	0	0	0	0	0	0	0	0	0	0	0	0
OTU1086	1.216	5.575	0.177212	0.487054	NotSig	Bacteria	Firmicutes	Clostridia	Clostridiales	Ruminococcaceae	Unassigned	0	0	0	0	0	0	0.004	0	0	0	0	0	0	0	0	0	0	0	0	0	0	0
OTU1088	1.216	5.575	0.177212	0.487054	NotSig	Bacteria	Firmicutes	Clostridia	Clostridiales	Ruminococcaceae	Unassigned	0	0	0	0	0	0	0.004	0	0	0	0	0	0	0	0	0	0	0	0	0	0	0
OTU1249	1.216	5.575	0.177212	0.487054	NotSig	Bacteria	Firmicutes	Clostridia	Clostridiales	Unassigned	Unassigned	0	0	0	0	0	0	0.004	0	0	0	0	0	0	0	0	0	0	0	0	0	0	0
OTU1536	-1.62	5.732	0.177938	0.488283	NotSig	Bacteria	Firmicutes	Clostridia	Clostridiales	Ruminococcaceae	Unassigned	0	0.001	0	0	0	0	0	0	0.002	0	0	0	0	0.006	0	0.003	0	0	0	0	0.004	0
OTU255	1.223	12.121	0.179467	0.49104	NotSig	Bacteria	Firmicutes	Erysipelotrichia	Erysipelotrichales	Erysipelotrichaceae	Catenibacterium	0.603	0.27	0.677	0.392	0.344	2.295	0.097	0.289	0.008	0.227	1.678	0.026	0.035	0.006	0.037	0.008	0.068	1.48	0.065	0.012	0.356	0.63
OTU314	2.372	6.426	0.179535	0.49104	NotSig	Bacteria	Unassigned	Unassigned	Unassigned	Unassigned	Unassigned	0.007	0.001	0	0.002	0	0	0	0	0	0	0	0.064	0	0	0	0	0.003	0	0.007	0	0	0
OTU762	2.444	6.116	0.179786	0.49104	NotSig	Bacteria	Actinobacteria	Actinobacteria	Coriobacteriales	Coriobacteriaceae	Olsenella	0.004	0	0	0	0	0	0	0	0	0	0.032	0.01	0	0	0	0	0	0	0	0	0.004	0
OTU180	2.103	6.142	0.181264	0.494305	NotSig	Bacteria	Unassigned	Unassigned	Unassigned	Unassigned	Unassigned	0.004	0.001	0	0.002	0	0	0	0	0	0	0	0.038	0	0	0.003	0	0	0	0.002	0	0	0.002
OTU914	-1.877	6.116	0.181808	0.494343	NotSig	Bacteria	Firmicutes	Clostridia	Clostridiales	Unassigned	Unassigned	0.001	0.005	0.007	0	0	0.002	0	0	0	0	0	0	0.003	0.037	0	0	0.003	0	0	0	0.002	0
OTU1357	-1.4	8.415	0.181847	0.494343	NotSig	Bacteria	Firmicutes	Clostridia	Clostridiales	Unassigned	Unassigned	0.017	0.042	0.002	0.019	0.002	0	0.011	0.033	0	0	0.102	0	0.005	0.009	0.026	0.018	0.019	0.038	0.058	0.004	0	0.24
OTU1050	1.109	9.815	0.182235	0.494343	NotSig	Bacteria	Firmicutes	Clostridia	Unassigned	Unassigned	Unassigned	0.113	0.05	0.022	0.271	0.002	0.016	0.052	0.003	0.531	0.045	0.057	0.135	0.057	0.052	0.003	0.094	0.066	0.011	0.075	0.097	0.022	0.025
OTU1659	-1.082	10.083	0.182409	0.494343	NotSig	Bacteria	Firmicutes	Clostridia	Clostridiales	Unassigned	Unassigned	0.066	0.126	0.012	0.036	0	0.028	0.095	0.003	0.212	0.12	0.121	0.028	0.052	0.061	0.037	0.089	0.232	0.056	0.192	0.146	0.383	0.011
OTU167	-1.472	6.582	0.185061	0.500753	NotSig	Bacteria	Unassigned	Unassigned	Unassigned	Unassigned	Unassigned	0.003	0.007	0.01	0.01	0.002	0	0	0.003	0	0	0	0.004	0.005	0	0	0.003	0.003	0.002	0.009	0	0	0.05
OTU1256	-1.304	8.87	0.185441	0.501007	NotSig	Bacteria	Firmicutes	Clostridia	Clostridiales	Unassigned	Unassigned	0.025	0.058	0	0	0	0	0.005	0.099	0	0.026	0.114	0.01	0.03	0.009	0.058	0.058	0.011	0.059	0.019	0.061	0.027	0.249
OTU579	-1.692	5.851	0.186996	0.504429	NotSig	Bacteria	Bacteroidetes	Bacteroidia	Bacteroidales	Prevotellaceae	Prevotella	0	0.002	0	0	0	0	0	0.003	0	0.002	0	0	0.005	0	0.003	0	0	0.014	0	0	0	0
OTU37	-1.206	10.287	0.188156	0.506776	NotSig	Bacteria	Bacteroidetes	Unassigned	Unassigned	Unassigned	Unassigned	0.075	0.18	0.053	0.245	0.135	0.049	0.143	0.003	0.024	0.022	0.005	0.07	0.3	0.565	0.224	0.52	0	0.027	0	0.146	0.015	0.005
OTU1048	-1.134	9.606	0.190506	0.512315	NotSig	Bacteria	Firmicutes	Clostridia	Clostridiales	Ruminococcaceae	Unassigned	0.048	0.086	0.019	0.007	0.011	0.012	0.133	0.061	0.051	0.152	0.012	0.018	0.074	0.014	0.016	0.183	0.005	0.045	0	0.295	0.223	0.009
OTU1307	2.115	6.029	0.191542	0.514004	NotSig	Bacteria	Firmicutes	Clostridia	Clostridiales	Ruminococcaceae	Unassigned	0.003	0	0	0.01	0	0	0	0	0	0.002	0	0.022	0	0	0	0	0	0	0.005	0	0	0
OTU770	1.143	6.935	0.191722	0.514004	NotSig	Bacteria	Actinobacteria	Actinobacteria	Actinomycetales	Micrococcaceae	Rothia	0.011	0.004	0.005	0	0.002	0	0.016	0.005	0.013	0.024	0.007	0.034	0.005	0.003	0	0.003	0.005	0	0.007	0.01	0	0.009
OTU1216	-1.4	5.704	0.192096	0.514218	NotSig	Bacteria	Firmicutes	Clostridia	Clostridiales	Lachnospiraceae	Unassigned	0	0.001	0	0.002	0	0	0	0	0	0	0	0	0	0	0	0	0.003	0	0.002	0.002	0	0.002
OTU918	1.131	5.988	0.195351	0.522131	NotSig	Bacteria	Firmicutes	Clostridia	Unassigned	Unassigned	Unassigned	0.003	0.001	0	0	0.002	0.002	0.005	0.005	0.002	0.006	0.002	0	0	0	0	0.003	0	0.002	0.002	0.002	0	0
OTU1567	-0.929	7.37	0.196798	0.525195	NotSig	Bacteria	Firmicutes	Clostridia	Clostridiales	Lachnospiraceae	Unassigned	0.009	0.016	0.029	0.019	0.009	0	0.014	0.003	0.002	0.004	0.007	0.002	0.008	0.035	0.018	0.016	0.019	0.038	0.009	0.012	0.002	0.007
OTU1409	-0.992	7.138	0.198217	0.527432	NotSig	Bacteria	Firmicutes	Clostridia	Clostridiales	Lachnospiraceae	Unassigned	0.007	0.013	0.007	0.024	0.002	0	0.004	0.013	0.002	0.008	0.002	0.006	0.005	0.049	0.016	0.005	0.014	0.002	0.009	0.018	0	0.011
OTU979	1.601	6.114	0.19824	0.527432	NotSig	Bacteria	Firmicutes	Clostridia	Clostridiales	Ruminococcaceae	Intestinimonas	0.004	0.001	0.007	0.012	0.002	0.014	0.002	0	0	0	0	0	0	0.006	0	0	0	0	0	0	0.004	0
OTU79	-1.437	10.802	0.198721	0.527911	NotSig	Bacteria	Firmicutes	Negativicutes	Selenomonadales	Veillonellaceae	Unassigned	0.097	0.274	0.062	0	0.011	0.124	0	0.693	0	0.024	0.047	0.01	2.118	0	0.082	0.029	0.014	0.315	0.007	0.012	0.024	0.138
OTU821	-1.781	8.363	0.199232	0.528463	NotSig	Bacteria	Firmicutes	Clostridia	Clostridiales	Unassigned	Unassigned	0.012	0.038	0	0.012	0	0	0.002	0	0.008	0.004	0.002	0.097	0	0	0.011	0.175	0	0	0	0.186	0.004	0
OTU450	-1.805	7	0.201028	0.531857	NotSig	Bacteria	Bacteroidetes	Bacteroidia	Bacteroidales	Prevotellaceae	Prevotella	0.004	0.015	0	0.017	0.011	0	0	0	0	0.002	0	0.006	0	0.009	0.132	0	0	0	0	0	0.002	0.002
OTU831	-1.945	7.794	0.20112	0.531857	NotSig	Bacteria	Firmicutes	Clostridia	Clostridiales	Lachnospiraceae	Pseudobutyrivibrio	0.006	0.026	0	0	0	0	0	0	0.06	0	0.002	0	0	0	0.005	0	0.085	0.011	0.119	0	0	0.039
OTU1508	2.273	6.356	0.201488	0.532026	NotSig	Bacteria	Firmicutes	Clostridia	Clostridiales	Clostridiaceae_1	Clostridium_sensu_stricto	0.005	0.001	0	0	0	0.054	0	0	0	0	0	0	0	0.003	0	0	0.003	0	0.005	0	0	0
OTU1693	1.205	6.644	0.20326	0.535229	NotSig	Bacteria	Firmicutes	Clostridia	Clostridiales	Unassigned	Unassigned	0.007	0.003	0.002	0.007	0.013	0.021	0.023	0.003	0	0	0	0.004	0.005	0.009	0.003	0	0	0.005	0	0	0.007	0.005
OTU103	-1.431	9.003	0.203313	0.535229	NotSig	Bacteria	Unassigned	Unassigned	Unassigned	Unassigned	Unassigned	0.025	0.08	0.005	0.036	0.007	0	0	0.018	0.015	0	0.005	0.165	0.044	0.692	0.008	0.01	0.003	0.011	0.023	0.012	0	0
OTU759	-1.447	6.57	0.204577	0.537563	NotSig	Bacteria	Actinobacteria	Actinobacteria	Actinomycetales	Corynebacteriaceae	Corynebacterium	0.002	0.007	0	0	0.007	0	0.005	0	0.006	0.004	0.002	0	0.055	0	0.003	0	0	0	0.005	0.006	0	0.007
OTU857	-1.464	6.054	0.204815	0.537563	NotSig	Bacteria	Firmicutes	Clostridia	Clostridiales	Unassigned	Unassigned	0.001	0.004	0	0	0	0.005	0	0.003	0	0	0.002	0	0.005	0.023	0	0.003	0	0.002	0	0.002	0	0
OTU366	1.563	9.003	0.205361	0.537734	NotSig	Bacteria	Bacteroidetes	Bacteroidia	Bacteroidales	Prevotellaceae	Unassigned	0.062	0.021	0.01	0.015	0.002	0.527	0	0.013	0.019	0.035	0	0	0	0.029	0.005	0.01	0	0.011	0	0.006	0.146	0
OTU1120	1.156	6.796	0.205496	0.537734	NotSig	Bacteria	Firmicutes	Clostridia	Clostridiales	Unassigned	Unassigned	0.009	0.004	0.019	0.002	0.013	0.005	0.002	0.005	0.011	0	0.005	0.028	0.014	0.012	0	0.013	0	0.002	0	0.002	0	0
OTU1063	1.265	6.797	0.206023	0.53798	NotSig	Bacteria	Firmicutes	Clostridia	Clostridiales	Ruminococcaceae	Unassigned	0.01	0.004	0	0.007	0	0.014	0.002	0.005	0	0.053	0.015	0.002	0	0.014	0	0.003	0	0.002	0	0.006	0.004	0.007
OTU755	0.908	7.958	0.206615	0.53798	NotSig	Bacteria	Actinobacteria	Actinobacteria	Coriobacteriales	Coriobacteriaceae	Unassigned	0.028	0.013	0.007	0.019	0.004	0.012	0.045	0.066	0.011	0.065	0.042	0.006	0.035	0.003	0.011	0.013	0.005	0.016	0.005	0.024	0.009	0.014
OTU1149	2.046	7.971	0.206762	0.53798	NotSig	Bacteria	Firmicutes	Clostridia	Clostridiales	Ruminococcaceae	Ruminococcus	0.034	0.009	0.153	0	0.101	0.082	0.002	0	0	0	0	0	0	0	0	0	0	0.081	0	0	0.004	0
OTU118	1.106	7.772	0.206821	0.53798	NotSig	Bacteria	Spirochaetes	Spirochaetia	Spirochaetales	Spirochaetaceae	Treponema	0.023	0.011	0.036	0.007	0.045	0.016	0	0.003	0.068	0.008	0.002	0.042	0.011	0.02	0.003	0.026	0.008	0.009	0	0.024	0.004	0
OTU438	1.337	7.645	0.208413	0.541315	NotSig	Bacteria	Bacteroidetes	Bacteroidia	Bacteroidales	Prevotellaceae	Prevotella	0.025	0.009	0.005	0.191	0.002	0	0	0	0.026	0.006	0.002	0.012	0.005	0.006	0.055	0.003	0.008	0.009	0	0.004	0.002	0
OTU1289	0.919	6.435	0.209508	0.543352	NotSig	Bacteria	Firmicutes	Clostridia	Clostridiales	Ruminococcaceae	Clostridium_III	0.006	0.003	0.007	0.012	0.002	0	0.004	0.005	0.008	0.006	0.002	0.01	0.003	0.003	0.003	0.005	0.005	0	0	0.002	0	0.007
OTU1300	-1.624	6.256	0.210671	0.545559	NotSig	Bacteria	Firmicutes	Clostridia	Clostridiales	Ruminococcaceae	Ruminococcus	0.001	0.005	0	0	0	0	0.002	0.005	0	0	0.007	0	0.008	0	0.003	0	0	0.034	0	0	0	0.007
OTU338	-1.5	6.223	0.211602	0.54716	NotSig	Bacteria	Unassigned	Unassigned	Unassigned	Unassigned	Unassigned	0.001	0.005	0	0	0	0	0	0.008	0	0	0.005	0.002	0	0.006	0	0	0.003	0.029	0.002	0	0	0.007
OTU459	1.124	7.038	0.212542	0.548392	NotSig	Bacteria	Bacteroidetes	Bacteroidia	Bacteroidales	Prevotellaceae	Prevotella	0.012	0.005	0.031	0.019	0.027	0	0.016	0	0.002	0.006	0	0.022	0.005	0.003	0	0.003	0.016	0.002	0.009	0.008	0.002	0
OTU883	-1.097	6.976	0.212706	0.548392	NotSig	Bacteria	Firmicutes	Clostridia	Clostridiales	Ruminococcaceae	Unassigned	0.005	0.011	0	0.015	0.007	0	0.009	0.003	0.008	0.004	0.002	0.004	0.03	0.003	0.011	0.026	0.011	0	0	0.022	0.004	0
OTU791	2.521	5.944	0.213459	0.549522	NotSig	Bacteria	Actinobacteria	Actinobacteria	Coriobacteriales	Coriobacteriaceae	Olsenella	0.003	0	0	0	0	0	0	0	0	0	0.03	0	0	0	0	0	0	0	0	0	0.002	0
OTU1153	-2.317	6.135	0.213908	0.549869	NotSig	Bacteria	Firmicutes	Clostridia	Clostridiales	Unassigned	Unassigned	0.001	0.005	0	0.002	0	0	0	0	0	0	0	0.004	0	0.052	0	0	0	0	0	0	0	0
OTU1379	0.856	9.412	0.215247	0.5525	NotSig	Bacteria	Firmicutes	Clostridia	Clostridiales	Ruminococcaceae	Unassigned	0.085	0.042	0.048	0.121	0.029	0.005	0.065	0.015	0.141	0.278	0.099	0.054	0.027	0.02	0.026	0.06	0.041	0.025	0.08	0.044	0.031	0.07
OTU1685	1.241	6.947	0.217477	0.557404	NotSig	Bacteria	Firmicutes	Clostridia	Clostridiales	Unassigned	Unassigned	0.01	0.004	0.005	0.005	0.004	0.005	0	0	0.066	0.004	0	0.012	0	0.006	0.003	0.003	0.008	0	0.014	0.006	0	0.002
OTU1339	-1.012	10.793	0.219973	0.562976	NotSig	Bacteria	Firmicutes	Clostridia	Clostridiales	Lachnospiraceae	Unassigned	0.123	0.227	0.265	0.114	0.112	0.002	0.183	0.304	0.039	0.126	0.052	0.032	0.087	0.081	0.121	0.008	0.224	0.185	0.241	0.014	0.002	1.311
OTU474	-1.361	6.077	0.221642	0.566124	NotSig	Bacteria	Bacteroidetes	Unassigned	Unassigned	Unassigned	Unassigned	0.001	0.003	0	0.002	0	0.002	0	0	0	0	0	0.006	0.005	0	0.008	0.01	0	0	0	0.006	0	0.002
OTU285	-1.593	7.778	0.221851	0.566124	NotSig	Bacteria	Firmicutes	Erysipelotrichia	Erysipelotrichales	Erysipelotrichaceae	Clostridium_XVIII	0.008	0.025	0	0	0	0	0.034	0.003	0.034	0.012	0	0	0.003	0	0.005	0	0.016	0.009	0.021	0	0	0.2
OTU1585	-1.331	5.794	0.222455	0.566443	NotSig	Bacteria	Proteobacteria	Unassigned	Unassigned	Unassigned	Unassigned	0	0.002	0	0.002	0	0	0	0	0.002	0	0	0	0	0.006	0.003	0	0.003	0	0	0	0.004	0
OTU1561	1.118	7.526	0.22281	0.566443	NotSig	Bacteria	Firmicutes	Clostridia	Clostridiales	Lachnospiraceae	Clostridium_XlVa	0.02	0.008	0.005	0	0.004	0	0.093	0.058	0	0.008	0.025	0.004	0.011	0.014	0.011	0.003	0.003	0.009	0	0.012	0.009	0.014
OTU144	-1.448	7.618	0.222948	0.566443	NotSig	Bacteria	Unassigned	Unassigned	Unassigned	Unassigned	Unassigned	0.008	0.023	0.005	0	0	0	0.041	0	0.004	0.02	0.005	0.008	0.106	0.02	0	0.068	0	0	0	0.03	0	0.002
OTU717	0.745	14.759	0.224254	0.568935	NotSig	Bacteria	Firmicutes	Clostridia	Clostridiales	Ruminococcaceae	Unassigned	3.437	1.98	3.862	1.726	1.535	8.066	4.995	2.851	3.904	4.09	1.586	1.752	1.526	2.158	1.216	2.774	2.305	1.674	1.733	2.927	1.287	2.198
OTU1403	1.306	7.358	0.224861	0.569154	NotSig	Bacteria	Firmicutes	Clostridia	Clostridiales	Lachnospiraceae	Unassigned	0.018	0.007	0.024	0.002	0.011	0	0.002	0.02	0	0.006	0.109	0.004	0.011	0	0.011	0.003	0	0.041	0	0	0.007	0
OTU1535	-1.392	5.689	0.224992	0.569154	NotSig	Bacteria	Firmicutes	Clostridia	Clostridiales	Ruminococcaceae	Unassigned	0	0.001	0	0	0	0	0.002	0	0	0	0	0	0	0	0	0	0	0.002	0	0	0.004	0.002
OTU846	1.12	7.109	0.226357	0.57111	NotSig	Bacteria	Firmicutes	Clostridia	Clostridiales	Unassigned	Unassigned	0.013	0.006	0	0.005	0.002	0	0.07	0.028	0.009	0.006	0.007	0.002	0.025	0.003	0.011	0.005	0.003	0	0.002	0.002	0	0.009
OTU562	-1.383	5.687	0.226418	0.57111	NotSig	Bacteria	Bacteroidetes	Bacteroidia	Bacteroidales	Prevotellaceae	Prevotella	0	0.001	0	0	0	0	0	0	0	0.002	0	0	0.003	0.006	0.003	0	0	0	0	0	0	0
OTU445	-1.128	10.671	0.227116	0.572044	NotSig	Bacteria	Bacteroidetes	Bacteroidia	Bacteroidales	Prevotellaceae	Prevotella	0.103	0.235	0.194	0.107	0.294	0	0.323	0.013	0.015	0.063	0.012	0.008	0.325	1.072	0.166	0.492	0.019	0.025	0	0.222	0.018	0.011
OTU185	-1.227	6.816	0.227545	0.572299	NotSig	Bacteria	Unassigned	Unassigned	Unassigned	Unassigned	Unassigned	0.004	0.009	0.005	0.002	0.002	0	0	0.008	0.013	0.002	0.002	0.004	0	0.009	0	0	0.019	0.007	0.047	0	0	0.007
OTU473	-2.032	6.355	0.228535	0.573964	NotSig	Bacteria	Bacteroidetes	Unassigned	Unassigned	Unassigned	Unassigned	0.001	0.005	0	0	0	0	0	0	0	0	0	0.012	0	0.009	0	0.021	0	0	0	0.024	0	0
OTU917	-1.219	5.933	0.2311	0.57887	NotSig	Bacteria	Firmicutes	Clostridia	Clostridiales	Unassigned	Unassigned	0.001	0.002	0	0.002	0	0	0.004	0	0.002	0	0	0	0	0.006	0.005	0.003	0	0	0.005	0	0.004	0
OTU1388	0.938	8.522	0.231151	0.57887	NotSig	Bacteria	Proteobacteria	Gammaproteobacteria	Aeromonadales	Succinivibrionaceae	Succinivibrio	0.043	0.024	0.036	0.039	0.074	0.07	0.011	0.01	0.011	0.114	0.007	0.054	0.044	0.101	0.008	0.034	0.008	0.009	0	0.002	0.007	0.029
OTU595	1.891	5.933	0.231602	0.579171	NotSig	Bacteria	Firmicutes	Unassigned	Unassigned	Unassigned	Unassigned	0.003	0.001	0	0	0	0	0	0.003	0	0	0.02	0.004	0	0.006	0	0	0	0	0	0	0	0
OTU6	-1.293	11.35	0.23366	0.582376	NotSig	Bacteria	Firmicutes	Negativicutes	Selenomonadales	Veillonellaceae	Selenomonas	0.16	0.406	0.206	0.002	0.034	0.002	0.009	1.065	0.002	0.171	0.084	0.026	0.576	0.009	1.549	0	0.055	1.841	0.005	0.016	0.004	0.007
OTU397	-0.873	9.551	0.234556	0.582376	NotSig	Bacteria	Bacteroidetes	Bacteroidia	Bacteroidales	Prevotellaceae	Prevotella	0.052	0.092	0.072	0.044	0.011	0.007	0.138	0.005	0.023	0.065	0.012	0.141	0.068	0.014	0.314	0.144	0.082	0.083	0.014	0.097	0.035	0.07
OTU1207	-1.075	9.467	0.234609	0.582376	NotSig	Bacteria	Firmicutes	Clostridia	Clostridiales	Unassigned	Unassigned	0.046	0.092	0.093	0	0.034	0	0.004	0.193	0.013	0.102	0.02	0.002	0.082	0.049	0.398	0.029	0.087	0.034	0.117	0.04	0	0.086
OTU1747	1.524	5.745	0.234685	0.582376	NotSig	Bacteria	Firmicutes	Clostridia	Clostridiales	Unassigned	Unassigned	0.001	0	0	0.002	0	0	0	0	0	0	0.002	0.008	0	0	0	0	0.003	0	0	0	0	0
OTU957	1.843	5.802	0.234722	0.582376	NotSig	Bacteria	Firmicutes	Clostridia	Clostridiales	Unassigned	Unassigned	0.002	0	0	0	0	0	0	0	0.009	0	0	0.006	0	0	0	0	0	0	0	0.002	0	0
OTU879	-1.213	6.307	0.234883	0.582376	NotSig	Bacteria	Firmicutes	Clostridia	Clostridiales	Unassigned	Unassigned	0.002	0.005	0	0.01	0.004	0	0.002	0	0.002	0.002	0	0	0.005	0.035	0.005	0	0	0.005	0	0.002	0.002	0
OTU1381	0.814	9.251	0.235578	0.583271	NotSig	Bacteria	Actinobacteria	Actinobacteria	Unassigned	Unassigned	Unassigned	0.074	0.037	0.031	0.031	0.045	0.016	0.178	0.053	0.054	0.148	0.151	0.032	0.033	0.017	0.018	0.044	0.005	0.027	0.033	0.069	0.075	0.045
OTU61	1.639	7.037	0.238129	0.588126	NotSig	Bacteria	Unassigned	Unassigned	Unassigned	Unassigned	Unassigned	0.014	0.004	0.084	0	0.054	0	0.004	0	0	0	0	0	0	0.02	0	0.01	0.003	0	0	0.002	0.007	0
OTU1636	-1.448	6.243	0.23838	0.588126	NotSig	Bacteria	Firmicutes	Clostridia	Clostridiales	Lachnospiraceae	Unassigned	0.001	0.004	0.002	0	0	0	0	0.003	0	0	0	0.01	0	0.003	0	0	0.019	0	0.014	0.002	0	0.005
OTU1044	-1.422	6.051	0.238548	0.588126	NotSig	Bacteria	Firmicutes	Clostridia	Clostridiales	Lachnospiraceae	Unassigned	0.001	0.003	0	0	0	0	0.002	0	0.004	0.004	0	0	0.011	0	0.003	0	0.011	0	0.007	0	0	0
OTU38	-0.98	12.267	0.239242	0.588722	NotSig	Bacteria	Bacteroidetes	Bacteroidia	Bacteroidales	Prevotellaceae	Unassigned	0.344	0.66	0.387	0.908	0.607	0.061	0.009	0.472	0.133	0.173	0.429	0.259	4.3	0.323	0.024	0.625	0.252	0.052	0.04	0.542	0.431	0.014
OTU792	-1.128	5.944	0.239662	0.588722	NotSig	Bacteria	Firmicutes	Clostridia	Clostridiales	Lachnospiraceae	Clostridium_XlVb	0.001	0.002	0	0.002	0	0	0	0	0	0	0.005	0.002	0.005	0.006	0	0	0.003	0.002	0	0.002	0.004	0
OTU852	1.224	7.64	0.241254	0.588722	NotSig	Bacteria	Firmicutes	Clostridia	Clostridiales	Ruminococcaceae	Unassigned	0.022	0.011	0.048	0.015	0.065	0.033	0.004	0	0.015	0.02	0.002	0.014	0	0.095	0.003	0.003	0	0.002	0	0.004	0	0
OTU1071	-0.937	11.777	0.241415	0.588722	NotSig	Bacteria	Firmicutes	Clostridia	Clostridiales	Unassigned	Unassigned	0.246	0.41	0.141	0.392	0.103	0.066	0.348	0.586	0.013	0.035	0.05	0.724	0.464	0.063	0.021	0.209	1.017	0.052	1.539	0.321	0.356	0.054
OTU673	-0.944	5.561	0.242817	0.588722	NotSig	Bacteria	Bacteroidetes	Bacteroidia	Bacteroidales	Porphyromonadaceae	Unassigned	0	0	0	0	0	0	0	0	0	0	0	0	0	0	0	0	0	0	0.002	0	0	0
OTU183	-1.447	5.897	0.242947	0.588722	NotSig	Bacteria	Proteobacteria	Deltaproteobacteria	Desulfovibrionales	Desulfovibrionaceae	Desulfovibrio	0.001	0.003	0	0	0.002	0	0.002	0	0	0.002	0	0	0	0.017	0.003	0.005	0	0	0	0	0	0
OTU1419	-0.906	6.496	0.24301	0.588722	NotSig	Bacteria	Firmicutes	Clostridia	Clostridiales	Unassigned	Unassigned	0.003	0.006	0.005	0	0.002	0.007	0.004	0.003	0.002	0.004	0.002	0.002	0	0.006	0	0.008	0	0.025	0.007	0.004	0.004	0.005
OTU1171	-0.941	5.561	0.243245	0.588722	NotSig	Bacteria	Firmicutes	Clostridia	Clostridiales	Ruminococcaceae	Unassigned	0	0	0	0	0	0	0	0	0	0	0	0	0	0	0	0	0	0	0	0.002	0	0
OTU1239	-0.941	5.561	0.243245	0.588722	NotSig	Bacteria	Firmicutes	Clostridia	Clostridiales	Ruminococcaceae	Oscillibacter	0	0	0	0	0	0	0	0	0	0	0	0	0	0	0	0	0	0	0	0.002	0	0
OTU358	-0.941	5.561	0.243245	0.588722	NotSig	Bacteria	Firmicutes	Unassigned	Unassigned	Unassigned	Unassigned	0	0	0	0	0	0	0	0	0	0	0	0	0	0	0	0	0	0	0	0.002	0	0
OTU1052	-0.931	5.559	0.24476	0.588722	NotSig	Bacteria	Firmicutes	Unassigned	Unassigned	Unassigned	Unassigned	0	0	0	0	0	0	0	0	0	0	0	0	0	0	0	0	0	0	0	0	0.002	0
OTU1053	-0.931	5.559	0.24476	0.588722	NotSig	Bacteria	Fusobacteria	Fusobacteriia	Fusobacteriales	Fusobacteriaceae	Fusobacterium	0	0	0	0	0	0	0	0	0	0	0	0	0	0	0	0	0	0	0	0	0.002	0
OTU1429	-1.402	6.849	0.244925	0.588722	NotSig	Bacteria	Firmicutes	Clostridia	Clostridiales	Lachnospiraceae	Fusicatenibacter	0.004	0.011	0	0	0	0	0	0.008	0	0.004	0.027	0	0	0.003	0.021	0	0.003	0.052	0.002	0.002	0	0.025
OTU1461	-1.117	7.269	0.245066	0.588722	NotSig	Bacteria	Firmicutes	Clostridia	Clostridiales	Lachnospiraceae	Anaerostipes	0.007	0.014	0	0.031	0	0.002	0.016	0	0.009	0.012	0	0	0	0.003	0.005	0.003	0.016	0.025	0.03	0.004	0.038	0.014
OTU716	0.765	11.928	0.245108	0.588722	NotSig	Bacteria	Firmicutes	Clostridia	Clostridiales	Ruminococcaceae	Unassigned	0.5	0.282	0.799	0.063	0.276	0.201	0.434	0.322	0.374	0.325	1.794	0.412	0.139	0.311	0.142	0.107	0.325	0.611	0.428	0.152	0.122	0.481
OTU984	-0.901	8.233	0.24539	0.588722	NotSig	Bacteria	Firmicutes	Clostridia	Clostridiales	Lachnospiraceae	Unassigned	0.018	0.035	0.036	0.01	0.061	0.014	0.014	0.008	0	0.018	0.007	0.012	0.057	0.012	0.069	0.063	0.101	0.018	0.005	0.008	0.011	0.005
OTU1298	-1.345	6.327	0.245809	0.588722	NotSig	Bacteria	Unassigned	Unassigned	Unassigned	Unassigned	Unassigned	0.002	0.005	0	0	0	0	0.009	0.003	0.002	0	0.005	0	0	0	0	0.003	0.005	0.036	0.005	0	0	0.005
OTU1511	1.121	6.945	0.24596	0.588722	NotSig	Bacteria	Firmicutes	Clostridia	Clostridiales	Lachnospiraceae	Unassigned	0.011	0.005	0.002	0.019	0	0.002	0	0	0.021	0.006	0.052	0.006	0.016	0.006	0.008	0.008	0	0	0	0.006	0.002	0.002
OTU793	0.941	8.3	0.246387	0.588722	NotSig	Bacteria	Firmicutes	Clostridia	Clostridiales	Ruminococcaceae	Unassigned	0.036	0.018	0.026	0.051	0.011	0.087	0.007	0.038	0.017	0.051	0.069	0.002	0.005	0.006	0.003	0.003	0.044	0.063	0.035	0	0.007	0.018
OTU651	-1.103	6.349	0.24792	0.588722	NotSig	Bacteria	Bacteroidetes	Bacteroidia	Bacteroidales	Porphyromonadaceae	Unassigned	0.002	0.005	0.005	0	0	0	0	0.008	0	0	0.002	0.008	0.011	0	0.013	0.008	0	0.005	0.005	0.006	0.002	0
OTU1462	1.336	6.537	0.247993	0.588722	NotSig	Bacteria	Firmicutes	Unassigned	Unassigned	Unassigned	Unassigned	0.007	0.003	0.024	0.005	0.007	0.019	0.009	0	0	0	0.007	0	0	0.012	0	0.003	0	0	0	0	0.011	0
OTU1032	-0.906	5.557	0.248333	0.588722	NotSig	Bacteria	Firmicutes	Clostridia	Clostridiales	Unassigned	Unassigned	0	0	0	0	0	0	0	0	0	0	0	0	0.003	0	0	0	0	0	0	0	0	0
OTU1066	-0.906	5.557	0.248333	0.588722	NotSig	Bacteria	Unassigned	Unassigned	Unassigned	Unassigned	Unassigned	0	0	0	0	0	0	0	0	0	0	0	0	0.003	0	0	0	0	0	0	0	0	0
OTU495	-0.897	5.556	0.249672	0.588722	NotSig	Bacteria	Bacteroidetes	Unassigned	Unassigned	Unassigned	Unassigned	0	0	0	0	0	0	0	0	0	0	0	0	0	0	0	0.003	0	0	0	0	0	0
OTU538	-0.897	5.556	0.249672	0.588722	NotSig	Bacteria	Bacteroidetes	Bacteroidia	Bacteroidales	Prevotellaceae	Prevotella	0	0	0	0	0	0	0	0	0	0	0	0	0	0	0	0.003	0	0	0	0	0	0
OTU1039	-0.886	5.555	0.251259	0.588722	NotSig	Bacteria	Firmicutes	Clostridia	Clostridiales	Ruminococcaceae	Unassigned	0	0	0	0	0	0	0	0	0	0	0	0	0	0.003	0	0	0	0	0	0	0	0
OTU1205	-0.886	5.555	0.251259	0.588722	NotSig	Bacteria	Firmicutes	Unassigned	Unassigned	Unassigned	Unassigned	0	0	0	0	0	0	0	0	0	0	0	0	0	0.003	0	0	0	0	0	0	0	0
OTU1727	-0.886	5.555	0.251259	0.588722	NotSig	Bacteria	Firmicutes	Clostridia	Clostridiales	Ruminococcaceae	Anaerotruncus	0	0	0	0	0	0	0	0	0	0	0	0	0	0.003	0	0	0	0	0	0	0	0
OTU175	-0.886	5.555	0.251259	0.588722	NotSig	Bacteria	Firmicutes	Bacilli	Lactobacillales	Lactobacillaceae	Lactobacillus	0	0	0	0	0	0	0	0	0	0	0	0	0	0.003	0	0	0	0	0	0	0	0
OTU221	-0.886	5.555	0.251259	0.588722	NotSig	Bacteria	Unassigned	Unassigned	Unassigned	Unassigned	Unassigned	0	0	0	0	0	0	0	0	0	0	0	0	0	0.003	0	0	0	0	0	0	0	0
OTU704	-0.886	5.555	0.251259	0.588722	NotSig	Bacteria	Deinococcus-Thermus	Deinococci	Deinococcales	Deinococcaceae	Deinococcus	0	0	0	0	0	0	0	0	0	0	0	0	0	0.003	0	0	0	0	0	0	0	0
OTU568	-0.882	5.555	0.251832	0.588722	NotSig	Bacteria	Bacteroidetes	Bacteroidia	Bacteroidales	Prevotellaceae	Prevotella	0	0	0	0	0	0	0	0	0	0	0	0	0	0	0.003	0	0	0	0	0	0	0
OTU599	-0.882	5.555	0.251832	0.588722	NotSig	Bacteria	Bacteroidetes	Bacteroidia	Bacteroidales	Prevotellaceae	Prevotella	0	0	0	0	0	0	0	0	0	0	0	0	0	0	0.003	0	0	0	0	0	0	0
OTU88	-0.882	5.555	0.251832	0.588722	NotSig	Bacteria	Firmicutes	Unassigned	Unassigned	Unassigned	Unassigned	0	0	0	0	0	0	0	0	0	0	0	0	0	0	0.003	0	0	0	0	0	0	0
OTU1035	-0.881	5.555	0.251925	0.588722	NotSig	Bacteria	Firmicutes	Clostridia	Unassigned	Unassigned	Unassigned	0	0	0	0	0	0	0	0	0	0	0	0	0	0	0	0	0	0	0	0	0	0.002
OTU1204	-0.881	5.555	0.251925	0.588722	NotSig	Bacteria	Firmicutes	Clostridia	Clostridiales	Unassigned	Unassigned	0	0	0	0	0	0	0	0	0	0	0	0	0	0	0	0	0	0	0	0	0	0.002
OTU1617	-0.881	5.555	0.251925	0.588722	NotSig	Bacteria	Firmicutes	Clostridia	Clostridiales	Lachnospiraceae	Unassigned	0	0	0	0	0	0	0	0	0	0	0	0	0	0	0	0	0	0	0	0	0	0.002
OTU303	-0.881	5.555	0.251925	0.588722	NotSig	Bacteria	Firmicutes	Negativicutes	Selenomonadales	Veillonellaceae	Megasphaera	0	0	0	0	0	0	0	0	0	0	0	0	0	0	0	0	0	0	0	0	0	0.002
OTU607	-0.881	5.555	0.251925	0.588722	NotSig	Bacteria	Bacteroidetes	Bacteroidia	Bacteroidales	Prevotellaceae	Prevotella	0	0	0	0	0	0	0	0	0	0	0	0	0	0	0	0	0	0	0	0	0	0.002
OTU190	-1.533	6.04	0.252509	0.589301	NotSig	Bacteria	Unassigned	Unassigned	Unassigned	Unassigned	Unassigned	0.001	0.003	0	0.005	0	0	0	0	0	0	0.005	0	0	0	0	0	0	0.023	0	0.004	0.002	0.002
OTU1254	0.975	8.077	0.25503	0.59439	NotSig	Bacteria	Firmicutes	Clostridia	Clostridiales	Ruminococcaceae	Unassigned	0.031	0.015	0.002	0.024	0	0.014	0.02	0.018	0.032	0.083	0.114	0.002	0.014	0	0.04	0.008	0.003	0.043	0.016	0.004	0.002	0.025
OTU593	-1.367	6.023	0.256039	0.595393	NotSig	Bacteria	Bacteroidetes	Bacteroidia	Bacteroidales	Prevotellaceae	Prevotella	0.001	0.003	0.005	0	0	0	0	0	0	0.006	0	0	0.016	0.003	0.008	0	0.003	0.002	0	0	0	0
OTU844	-1.215	6.834	0.256142	0.595393	NotSig	Bacteria	Firmicutes	Clostridia	Unassigned	Unassigned	Unassigned	0.004	0.008	0.01	0.005	0.011	0	0	0	0	0.006	0	0.01	0	0.009	0	0.013	0.011	0	0.023	0.026	0.002	0
OTU203	-1.652	5.974	0.256636	0.595749	NotSig	Bacteria	Unassigned	Unassigned	Unassigned	Unassigned	Unassigned	0.001	0.003	0	0	0	0	0	0.003	0	0	0.002	0.002	0	0	0	0	0	0.007	0	0	0	0.02
OTU532	-1.459	6.456	0.257359	0.596111	NotSig	Bacteria	Bacteroidetes	Bacteroidia	Bacteroidales	Prevotellaceae	Prevotella	0.002	0.007	0.002	0	0	0.002	0	0.015	0	0	0.002	0	0.014	0	0.005	0	0	0.045	0	0	0	0.005
OTU621	1.587	6.082	0.257618	0.596111	NotSig	Bacteria	Bacteroidetes	Bacteroidia	Bacteroidales	Porphyromonadaceae	Unassigned	0.003	0.001	0	0	0	0.021	0.002	0	0.008	0	0	0	0.003	0	0	0	0	0.005	0.002	0	0	0
OTU1260	-1.035	7.986	0.257815	0.596111	NotSig	Bacteria	Firmicutes	Clostridia	Clostridiales	Eubacteriaceae	Eubacterium	0.014	0.027	0.017	0.007	0.013	0	0.029	0.005	0.009	0.061	0	0.002	0.025	0	0.008	0.005	0.03	0.032	0.065	0.008	0	0.095
OTU490	-0.831	5.551	0.259858	0.598461	NotSig	Bacteria	Bacteroidetes	Bacteroidia	Bacteroidales	Porphyromonadaceae	Barnesiella	0	0	0	0	0	0	0	0	0	0	0	0	0	0	0	0	0	0.002	0	0	0	0
OTU530	-0.831	5.551	0.259858	0.598461	NotSig	Bacteria	Bacteroidetes	Bacteroidia	Bacteroidales	Porphyromonadaceae	Unassigned	0	0	0	0	0	0	0	0	0	0	0	0	0	0	0	0	0	0.002	0	0	0	0
OTU596	-0.831	5.551	0.259858	0.598461	NotSig	Bacteria	Bacteroidetes	Bacteroidia	Bacteroidales	Prevotellaceae	Prevotella	0	0	0	0	0	0	0	0	0	0	0	0	0	0	0	0	0	0.002	0	0	0	0
OTU1454	-0.955	7.467	0.26086	0.599978	NotSig	Bacteria	Firmicutes	Clostridia	Clostridiales	Lachnospiraceae	Unassigned	0.009	0.018	0.014	0.007	0.016	0	0.002	0.048	0	0.002	0.005	0	0.022	0.037	0.018	0.013	0.027	0.032	0	0.012	0.007	0.014
OTU1520	2.212	5.88	0.261926	0.601574	NotSig	Bacteria	Firmicutes	Clostridia	Clostridiales	Ruminococcaceae	Clostridium_IV	0.003	0	0	0.027	0	0	0	0	0	0	0	0	0	0	0	0	0	0	0.002	0	0	0
OTU1598	-0.986	7.474	0.262242	0.601574	NotSig	Bacteria	Firmicutes	Clostridia	Clostridiales	Lachnospiraceae	Clostridium_XlVa	0.009	0.019	0.012	0.031	0.007	0.002	0	0.018	0	0	0.01	0.014	0.008	0.014	0.084	0.005	0.005	0.034	0	0.002	0.02	0.014
OTU996	-1.282	13.115	0.264149	0.605155	NotSig	Bacteria	Firmicutes	Clostridia	Clostridiales	Lachnospiraceae	Unassigned	0.491	1.044	0.014	0.165	0.004	0	0.194	0.066	1.166	0.004	0.04	3.259	0.041	0.026	0.15	4.16	0.208	0.002	0.227	5.594	0.004	0.027
OTU1236	-1.101	5.761	0.265593	0.606781	NotSig	Bacteria	Firmicutes	Clostridia	Clostridiales	Ruminococcaceae	Unassigned	0	0.001	0.002	0	0	0	0	0	0	0	0.002	0	0	0.003	0.003	0	0.003	0	0	0.002	0	0.002
OTU1058	1.447	6.264	0.265842	0.606781	NotSig	Bacteria	Firmicutes	Clostridia	Clostridiales	Lachnospiraceae	Clostridium_XlVa	0.005	0.001	0.002	0	0.002	0	0	0.043	0	0.002	0	0	0.003	0	0.003	0.005	0	0	0	0.004	0	0
OTU23	-0.955	11.831	0.265901	0.606781	NotSig	Bacteria	Bacteroidetes	Bacteroidia	Bacteroidales	Prevotellaceae	Prevotella	0.255	0.505	0.165	0.051	0.254	0	0.03	0.634	0.008	0.447	0.652	0.312	1.231	0.778	1.989	0.212	0.046	0.034	0.026	0.125	0.506	0.104
OTU404	0.86	8.965	0.266252	0.606792	NotSig	Bacteria	Bacteroidetes	Unassigned	Unassigned	Unassigned	Unassigned	0.056	0.033	0.038	0.031	0.038	0.234	0.032	0.058	0	0.02	0.035	0.074	0.098	0.009	0.034	0.024	0.022	0.083	0.014	0.028	0.002	0.016
OTU809	0.839	8.841	0.26814	0.610298	NotSig	Bacteria	Firmicutes	Clostridia	Clostridiales	Unassigned	Unassigned	0.055	0.028	0.012	0.077	0.007	0.021	0.163	0	0.017	0.108	0.067	0.078	0.005	0.029	0.011	0.021	0.057	0.034	0.056	0.034	0.018	0.014
OTU1384	-0.962	9.181	0.268681	0.610735	NotSig	Bacteria	Firmicutes	Clostridia	Clostridiales	Lachnospiraceae	Unassigned	0.038	0.07	0.086	0.024	0.076	0.002	0.011	0.005	0.024	0.071	0.025	0.052	0	0.19	0	0.026	0.216	0.02	0.175	0.014	0.049	0.005
OTU70	-0.943	5.956	0.270818	0.614792	NotSig	Bacteria	Firmicutes	Unassigned	Unassigned	Unassigned	Unassigned	0.001	0.002	0.005	0.002	0	0	0	0	0	0.002	0	0.002	0	0.003	0.003	0.005	0	0.002	0.005	0.002	0.002	0
OTU1558	1.003	6.25	0.271914	0.616015	NotSig	Bacteria	Firmicutes	Clostridia	Clostridiales	Lachnospiraceae	Unassigned	0.004	0.002	0	0.002	0.004	0	0.002	0.003	0	0.024	0.002	0.006	0.003	0	0.003	0.003	0.003	0.002	0	0	0	0.007
OTU417	-0.923	9.648	0.272062	0.616015	NotSig	Bacteria	Bacteroidetes	Unassigned	Unassigned	Unassigned	Unassigned	0.05	0.103	0.043	0.015	0.034	0.211	0.004	0.028	0.004	0.089	0.007	0.07	0.126	0.447	0.034	0.191	0.005	0.032	0.007	0.158	0.022	0.007
OTU1109	-1.329	5.779	0.273366	0.618167	NotSig	Bacteria	Firmicutes	Clostridia	Clostridiales	Unassigned	Unassigned	0	0.002	0	0	0	0	0.002	0	0	0	0	0.002	0	0.012	0	0	0	0.002	0	0.002	0	0
OTU270	-1.433	5.713	0.274955	0.620958	NotSig	Bacteria	Unassigned	Unassigned	Unassigned	Unassigned	Unassigned	0	0.001	0	0	0	0	0	0	0	0	0.002	0	0	0	0	0	0	0.007	0	0	0	0.005
OTU915	1.109	6.646	0.275637	0.621696	NotSig	Bacteria	Firmicutes	Clostridia	Clostridiales	Unassigned	Unassigned	0.008	0.003	0	0.024	0	0	0.007	0	0.013	0.002	0.007	0.022	0.016	0	0	0.003	0.008	0	0.002	0	0.002	0.002
OTU1331	1.712	5.919	0.276791	0.623277	NotSig	Bacteria	Unassigned	Unassigned	Unassigned	Unassigned	Unassigned	0.002	0	0	0	0	0	0.007	0	0	0	0.017	0	0	0	0	0	0.003	0	0	0	0.002	0
OTU7	1.12	14.296	0.277052	0.623277	NotSig	Bacteria	Firmicutes	Negativicutes	Selenomonadales	Veillonellaceae	Megasphaera	2.808	1.346	0.701	0.065	0.503	3.403	2.449	14.943	0.004	0.185	5.564	0.266	0.167	0.014	5.474	0.031	0.011	3.405	0.005	0.038	0.283	4.03
OTU835	-1.02	8.043	0.278229	0.625122	NotSig	Bacteria	Firmicutes	Clostridia	Clostridiales	Ruminococcaceae	Butyricicoccus	0.015	0.028	0.022	0.015	0.007	0.007	0.004	0.015	0.004	0.004	0.074	0	0.025	0	0.005	0	0.085	0.005	0.063	0.002	0.004	0.091
OTU430	-1.84	8.494	0.279636	0.627334	NotSig	Bacteria	Bacteroidetes	Bacteroidia	Bacteroidales	Unassigned	Unassigned	0.014	0.04	0	0.073	0	0	0	0	0	0.002	0.007	0.062	0	0	0	0	0	0.002	0	0	0.403	0
OTU1406	0.738	9.895	0.279932	0.627334	NotSig	Bacteria	Firmicutes	Clostridia	Clostridiales	Lachnospiraceae	Dorea	0.11	0.066	0.077	0.077	0.058	0.412	0.025	0.043	0.06	0.177	0.092	0.078	0.033	0.112	0.029	0.029	0.15	0.054	0.131	0.022	0.062	0.041
OTU849	1.013	6.794	0.281822	0.630761	NotSig	Bacteria	Firmicutes	Clostridia	Clostridiales	Unassigned	Unassigned	0.009	0.005	0.002	0.015	0.02	0	0.014	0.005	0.006	0.008	0	0.018	0.014	0.023	0	0	0	0	0	0.002	0.004	0.002
OTU396	0.786	9.881	0.282242	0.630894	NotSig	Bacteria	Bacteroidetes	Unassigned	Unassigned	Unassigned	Unassigned	0.112	0.07	0.019	0.189	0.049	0.232	0.03	0.086	0.148	0.177	0.015	0.175	0.063	0.305	0.05	0.016	0.016	0.083	0.012	0.02	0.113	0.018
OTU798	-1.113	6.276	0.283267	0.63223	NotSig	Bacteria	Firmicutes	Clostridia	Clostridiales	Lachnospiraceae	Unassigned	0.002	0.005	0	0	0	0	0.002	0.01	0.002	0.004	0	0.002	0.008	0	0.021	0	0	0.009	0	0.002	0	0.007
OTU1272	-1.78	6.14	0.283893	0.63223	NotSig	Bacteria	Firmicutes	Clostridia	Clostridiales	Unassigned	Unassigned	0.001	0.004	0	0	0	0	0.007	0.003	0	0	0	0	0	0	0.021	0	0	0	0	0	0	0.02
OTU802	0.884	5.56	0.285407	0.63223	NotSig	Bacteria	Firmicutes	Clostridia	Clostridiales	Unassigned	Unassigned	0	0	0	0	0	0.002	0	0	0	0	0	0	0	0	0	0	0	0	0	0	0	0
OTU810	-1.163	9.336	0.285836	0.63223	NotSig	Bacteria	Proteobacteria	Gammaproteobacteria	Aeromonadales	Succinivibrionaceae	Succinivibrio	0.036	0.09	0	0.002	0.007	0.133	0.03	0.02	0.004	0.037	0.114	0.008	0.816	0.006	0.008	0.044	0.008	0.002	0	0.002	0	0.014
OTU1172	1.185	6.316	0.286004	0.63223	NotSig	Bacteria	Firmicutes	Clostridia	Clostridiales	Ruminococcaceae	Oscillibacter	0.005	0.002	0.017	0.005	0.013	0	0.011	0	0	0	0.005	0	0.008	0	0.003	0.003	0	0	0	0	0	0.007
OTU184	-1.301	5.81	0.287524	0.63223	NotSig	Bacteria	Unassigned	Unassigned	Unassigned	Unassigned	Unassigned	0	0.002	0	0	0	0.002	0	0.003	0	0	0	0	0.005	0	0.003	0	0	0.009	0	0	0	0
OTU487	1.582	5.743	0.288211	0.63223	NotSig	Bacteria	Bacteroidetes	Bacteroidia	Bacteroidales	Bacteroidaceae	Bacteroides	0.001	0	0	0	0.002	0.009	0	0	0	0	0	0	0	0	0	0	0	0	0	0	0	0.002
OTU1049	-1.635	6.122	0.28849	0.63223	NotSig	Bacteria	Firmicutes	Clostridia	Clostridiales	Unassigned	Unassigned	0.001	0.003	0	0.007	0	0	0.002	0	0	0	0	0.002	0	0	0	0.008	0	0	0	0.022	0	0
OTU1070	0.855	5.557	0.289755	0.63223	NotSig	Bacteria	Firmicutes	Clostridia	Clostridiales	Unassigned	Unassigned	0	0	0	0	0.002	0	0	0	0	0	0	0	0	0	0	0	0	0	0	0	0	0
OTU1719	0.855	5.557	0.289755	0.63223	NotSig	Bacteria	Firmicutes	Clostridia	Clostridiales	Clostridiales_Incertae_Sedis_XI	Helcococcus	0	0	0	0	0.002	0	0	0	0	0	0	0	0	0	0	0	0	0	0	0	0	0
OTU1734	0.855	5.557	0.289755	0.63223	NotSig	Bacteria	Firmicutes	Clostridia	Clostridiales	Unassigned	Unassigned	0	0	0	0	0.002	0	0	0	0	0	0	0	0	0	0	0	0	0	0	0	0	0
OTU517	0.855	5.557	0.289755	0.63223	NotSig	Bacteria	Bacteroidetes	Flavobacteriia	Flavobacteriales	Cryomorphaceae	Unassigned	0	0	0	0	0.002	0	0	0	0	0	0	0	0	0	0	0	0	0	0	0	0	0
OTU1627	-1.456	5.919	0.289861	0.63223	NotSig	Bacteria	Firmicutes	Clostridia	Clostridiales	Lachnospiraceae	Unassigned	0.001	0.002	0	0.005	0	0	0	0.003	0	0	0	0	0	0	0	0.01	0	0.011	0.002	0	0	0
OTU78	-1.318	5.677	0.290081	0.63223	NotSig	Bacteria	Proteobacteria	Deltaproteobacteria	Desulfovibrionales	Desulfovibrionaceae	Desulfovibrio	0	0.001	0	0	0	0	0	0	0	0.002	0	0	0	0.006	0	0	0	0.005	0	0	0	0
OTU647	-1.805	6.371	0.290586	0.63223	NotSig	Bacteria	Bacteroidetes	Bacteroidia	Bacteroidales	Prevotellaceae	Prevotella	0.001	0.006	0	0	0	0	0.011	0	0	0	0	0.004	0.049	0	0.016	0	0	0	0	0	0	0
OTU208	2.017	5.836	0.291119	0.63223	NotSig	Bacteria	Unassigned	Unassigned	Unassigned	Unassigned	Unassigned	0.002	0	0	0	0	0	0.02	0	0	0	0	0	0	0	0	0	0	0	0	0	0.002	0
OTU60	-0.793	8.111	0.291277	0.63223	NotSig	Bacteria	Firmicutes	Clostridia	Clostridiales	Unassigned	Unassigned	0.018	0.03	0.024	0.039	0.007	0	0.041	0.01	0.006	0.002	0.012	0.036	0.03	0.081	0.016	0.047	0.068	0.007	0.028	0.008	0.013	0.007
OTU199	0.845	5.556	0.291392	0.63223	NotSig	Bacteria	Firmicutes	Negativicutes	Selenomonadales	Veillonellaceae	Megasphaera	0	0	0	0	0	0	0	0	0	0	0.002	0	0	0	0	0	0	0	0	0	0	0
OTU795	0.845	5.556	0.291392	0.63223	NotSig	Bacteria	Actinobacteria	Actinobacteria	Coriobacteriales	Coriobacteriaceae	Unassigned	0	0	0	0	0	0	0	0	0	0	0.002	0	0	0	0	0	0	0	0	0	0	0
OTU1059	0.842	5.556	0.291774	0.63223	NotSig	Bacteria	Firmicutes	Clostridia	Clostridiales	Unassigned	Unassigned	0	0	0	0	0	0	0	0.003	0	0	0	0	0	0	0	0	0	0	0	0	0	0
OTU1335	0.842	5.556	0.291774	0.63223	NotSig	Bacteria	Synergistetes	Synergistia	Synergistales	Synergistaceae	Cloacibacillus	0	0	0	0	0	0	0	0.003	0	0	0	0	0	0	0	0	0	0	0	0	0	0
OTU1366	0.842	5.556	0.291774	0.63223	NotSig	Bacteria	Firmicutes	Clostridia	Clostridiales	Ruminococcaceae	Unassigned	0	0	0	0	0	0	0	0.003	0	0	0	0	0	0	0	0	0	0	0	0	0	0
OTU307	0.842	5.556	0.291774	0.63223	NotSig	Bacteria	Unassigned	Unassigned	Unassigned	Unassigned	Unassigned	0	0	0	0	0	0	0	0.003	0	0	0	0	0	0	0	0	0	0	0	0	0	0
OTU310	0.842	5.556	0.291774	0.63223	NotSig	Bacteria	Proteobacteria	Gammaproteobacteria	Pseudomonadales	Moraxellaceae	Moraxella	0	0	0	0	0	0	0	0.003	0	0	0	0	0	0	0	0	0	0	0	0	0	0
OTU623	1.023	8.459	0.291882	0.63223	NotSig	Bacteria	Bacteroidetes	Bacteroidia	Bacteroidales	Unassigned	Unassigned	0.044	0.02	0.024	0	0.02	0.002	0.005	0.368	0	0.01	0.002	0.004	0.027	0.003	0.013	0.008	0.011	0.088	0.019	0.018	0.004	0.011
OTU1460	-1.143	6.868	0.292738	0.632919	NotSig	Bacteria	Firmicutes	Clostridia	Clostridiales	Ruminococcaceae	Unassigned	0.004	0.01	0	0	0.007	0	0.004	0	0.013	0.014	0.005	0	0.014	0	0.034	0	0.005	0.002	0.033	0	0	0.009
OTU510	1.147	5.69	0.292924	0.632919	NotSig	Bacteria	Bacteroidetes	Bacteroidia	Bacteroidales	Prevotellaceae	Prevotella	0.001	0	0.002	0	0.002	0	0	0.003	0	0	0.002	0	0	0.003	0	0	0	0	0	0	0	0
OTU277	-0.72	12.182	0.295074	0.634074	NotSig	Bacteria	Firmicutes	Negativicutes	Selenomonadales	Acidaminococcaceae	Phascolarctobacterium	0.378	0.592	1.074	0.165	0.315	0.028	0.143	0.731	0.068	0.719	0.213	0.326	0.42	0.585	0.797	0.826	1.687	0.694	0.18	0.301	0.046	0.379
OTU878	-1.095	6.373	0.295608	0.634074	NotSig	Bacteria	Firmicutes	Clostridia	Clostridiales	Unassigned	Unassigned	0.002	0.005	0.002	0.002	0	0	0.005	0	0	0.002	0.007	0.004	0	0	0.003	0.003	0.005	0.009	0.028	0	0	0
OTU1443	0.791	6.865	0.297224	0.634074	NotSig	Bacteria	Firmicutes	Clostridia	Clostridiales	Lachnospiraceae	Unassigned	0.01	0.005	0.024	0.012	0.009	0	0.009	0.003	0.002	0.026	0.012	0.002	0	0.009	0.013	0.005	0.005	0.009	0.002	0.004	0.004	0
OTU226	0.808	5.553	0.297364	0.634074	NotSig	Bacteria	Unassigned	Unassigned	Unassigned	Unassigned	Unassigned	0	0	0	0	0	0	0	0	0.002	0	0	0	0	0	0	0	0	0	0	0	0	0
OTU349	0.808	5.553	0.297364	0.634074	NotSig	Bacteria	Unassigned	Unassigned	Unassigned	Unassigned	Unassigned	0	0	0	0	0	0	0	0	0.002	0	0	0	0	0	0	0	0	0	0	0	0	0
OTU477	-1.211	6.221	0.298731	0.634074	NotSig	Bacteria	Bacteroidetes	Bacteroidia	Bacteroidales	Bacteroidaceae	Bacteroides	0.002	0.005	0	0.012	0	0	0	0	0	0.004	0	0.002	0.005	0.02	0.011	0.005	0	0	0	0.004	0	0
OTU1068	0.799	5.552	0.298755	0.634074	NotSig	Bacteria	Unassigned	Unassigned	Unassigned	Unassigned	Unassigned	0	0	0	0.002	0	0	0	0	0	0	0	0	0	0	0	0	0	0	0	0	0	0
OTU1591	0.799	5.552	0.298755	0.634074	NotSig	Bacteria	Proteobacteria	Unassigned	Unassigned	Unassigned	Unassigned	0	0	0	0.002	0	0	0	0	0	0	0	0	0	0	0	0	0	0	0	0	0	0
OTU249	0.799	5.552	0.298755	0.634074	NotSig	Bacteria	Proteobacteria	Gammaproteobacteria	Legionellales	Coxiellaceae	Diplorickettsia	0	0	0	0.002	0	0	0	0	0	0	0	0	0	0	0	0	0	0	0	0	0	0
OTU306	0.799	5.552	0.298755	0.634074	NotSig	Bacteria	Firmicutes	Bacilli	Bacillales	Staphylococcaceae	Jeotgalicoccus	0	0	0	0.002	0	0	0	0	0	0	0	0	0	0	0	0	0	0	0	0	0	0
OTU603	0.799	5.552	0.298755	0.634074	NotSig	Bacteria	Bacteroidetes	Bacteroidia	Bacteroidales	Prevotellaceae	Prevotella	0	0	0	0.002	0	0	0	0	0	0	0	0	0	0	0	0	0	0	0	0	0	0
OTU668	0.799	5.552	0.298755	0.634074	NotSig	Bacteria	Bacteroidetes	Bacteroidia	Bacteroidales	Porphyromonadaceae	Unassigned	0	0	0	0.002	0	0	0	0	0	0	0	0	0	0	0	0	0	0	0	0	0	0
OTU1227	0.797	5.552	0.299228	0.634074	NotSig	Bacteria	Firmicutes	Clostridia	Clostridiales	Ruminococcaceae	Unassigned	0	0	0	0	0	0	0	0	0	0	0	0.002	0	0	0	0	0	0	0	0	0	0
OTU273	0.797	5.552	0.299228	0.634074	NotSig	Bacteria	Firmicutes	Bacilli	Lactobacillales	Aerococcaceae	Aerococcus	0	0	0	0	0	0	0	0	0	0	0	0.002	0	0	0	0	0	0	0	0	0	0
OTU276	0.797	5.552	0.299228	0.634074	NotSig	Bacteria	Unassigned	Unassigned	Unassigned	Unassigned	Unassigned	0	0	0	0	0	0	0	0	0	0	0	0.002	0	0	0	0	0	0	0	0	0	0
OTU1275	-1.018	8.614	0.299263	0.634074	NotSig	Bacteria	Firmicutes	Clostridia	Clostridiales	Unassigned	Unassigned	0.024	0.044	0	0	0.004	0	0.022	0.008	0.023	0.079	0.102	0	0.066	0.003	0.016	0.042	0.03	0.097	0.126	0.044	0	0.018
OTU494	-1.107	13.012	0.300343	0.635124	NotSig	Bacteria	Bacteroidetes	Unassigned	Unassigned	Unassigned	Unassigned	0.556	1.027	0.187	3.295	0.717	0.002	0.066	0	0.208	0.061	0.005	1.022	0.262	0.075	0.121	6.229	0.096	0.011	0.026	3.329	0.1	0.023
OTU1165	-0.719	10.48	0.300485	0.635124	NotSig	Bacteria	Firmicutes	Clostridia	Clostridiales	Lachnospiraceae	Coprococcus	0.109	0.171	0.031	0.109	0.038	0.044	0.219	0.061	0.038	0.276	0.245	0.032	0.044	0.213	0.082	0.029	0.391	0.306	0.267	0.024	0.155	0.195
OTU1592	0.772	5.55	0.303383	0.638933	NotSig	Bacteria	Firmicutes	Clostridia	Clostridiales	Lachnospiraceae	Unassigned	0	0	0.002	0	0	0	0	0	0	0	0	0	0	0	0	0	0	0	0	0	0	0
OTU460	0.772	5.55	0.303383	0.638933	NotSig	Bacteria	Bacteroidetes	Bacteroidia	Bacteroidales	Prevotellaceae	Prevotella	0	0	0.002	0	0	0	0	0	0	0	0	0	0	0	0	0	0	0	0	0	0	0
OTU976	0.772	5.55	0.303383	0.638933	NotSig	Bacteria	Firmicutes	Clostridia	Clostridiales	Unassigned	Unassigned	0	0	0.002	0	0	0	0	0	0	0	0	0	0	0	0	0	0	0	0	0	0	0
OTU994	-1.33	5.691	0.304316	0.640125	NotSig	Bacteria	Firmicutes	Clostridia	Clostridiales	Unassigned	Unassigned	0	0.001	0	0.002	0	0	0	0	0	0	0	0	0	0.009	0	0.003	0	0	0	0	0	0
OTU1522	-1.032	6.199	0.306268	0.641985	NotSig	Bacteria	Firmicutes	Clostridia	Clostridiales	Ruminococcaceae	Unassigned	0.002	0.004	0	0.012	0.002	0	0	0	0.002	0	0	0.002	0.005	0.006	0.005	0.008	0.005	0	0	0.008	0	0
OTU481	1.163	6.506	0.306297	0.641985	NotSig	Bacteria	Bacteroidetes	Bacteroidia	Bacteroidales	Prevotellaceae	Prevotella	0.007	0.003	0.005	0.046	0.007	0.002	0.005	0.003	0	0.002	0	0	0.008	0	0.016	0.005	0	0	0	0	0	0
OTU1158	1.958	5.827	0.306606	0.641985	NotSig	Bacteria	Firmicutes	Clostridia	Clostridiales	Unassigned	Unassigned	0.002	0	0	0.022	0	0	0	0	0	0	0	0	0	0	0	0	0	0	0.002	0	0	0
OTU348	-1.25	5.88	0.307581	0.641985	NotSig	Bacteria	Unassigned	Unassigned	Unassigned	Unassigned	Unassigned	0.001	0.002	0	0	0.004	0	0	0	0	0.002	0	0	0.003	0.014	0.003	0	0	0	0.002	0	0	0
OTU1581	1.223	5.688	0.307905	0.641985	NotSig	Bacteria	Firmicutes	Clostridia	Clostridiales	Ruminococcaceae	Unassigned	0.001	0	0	0.002	0.002	0	0	0	0	0	0.005	0	0	0	0	0	0	0.002	0	0	0	0
OTU298	0.743	5.547	0.308603	0.641985	NotSig	Bacteria	Proteobacteria	Betaproteobacteria	Burkholderiales	Unassigned	Unassigned	0	0	0	0	0	0	0	0	0	0.002	0	0	0	0	0	0	0	0	0	0	0	0
OTU400	0.743	5.547	0.308603	0.641985	NotSig	Bacteria	Bacteroidetes	Bacteroidia	Bacteroidales	Prevotellaceae	Prevotella	0	0	0	0	0	0	0	0	0	0.002	0	0	0	0	0	0	0	0	0	0	0	0
OTU227	0.742	5.547	0.308801	0.641985	NotSig	Bacteria	Firmicutes	Bacilli	Lactobacillales	Lactobacillaceae	Lactobacillus	0	0	0	0	0	0	0.002	0	0	0	0	0	0	0	0	0	0	0	0	0	0	0
OTU536	0.742	5.547	0.308801	0.641985	NotSig	Bacteria	Bacteroidetes	Bacteroidia	Bacteroidales	Bacteroidaceae	Bacteroides	0	0	0	0	0	0	0.002	0	0	0	0	0	0	0	0	0	0	0	0	0	0	0
OTU980	1.078	5.678	0.309009	0.641985	NotSig	Bacteria	Firmicutes	Clostridia	Clostridiales	Unassigned	Unassigned	0.001	0	0.002	0.002	0	0	0.002	0	0	0	0.002	0	0	0.003	0	0	0	0	0	0	0	0
OTU373	-1.127	10.193	0.309601	0.641985	NotSig	Bacteria	Bacteroidetes	Bacteroidia	Bacteroidales	Prevotellaceae	Prevotella	0.076	0.152	0.041	0.007	0.047	0	0.167	0.008	0.004	0.455	0.005	0.03	0.172	0.006	0	0.008	1.107	0.005	0.215	0.002	0.009	0
OTU896	-1.352	6.275	0.309607	0.641985	NotSig	Bacteria	Lentisphaerae	Oligosphaeria	Oligosphaerales	Oligosphaeraceae	Oligosphaera	0.002	0.005	0	0	0	0.005	0.009	0	0	0	0.002	0	0.025	0.023	0	0.003	0	0	0	0.002	0	0
OTU1660	-1.4	6.068	0.311095	0.644306	NotSig	Bacteria	Firmicutes	Clostridia	Clostridiales	Lachnospiraceae	Unassigned	0.001	0.003	0	0	0	0	0.002	0	0	0	0.002	0.006	0	0	0	0.003	0.019	0	0.009	0	0	0
OTU1464	-1.087	6.79	0.311773	0.644945	NotSig	Bacteria	Firmicutes	Clostridia	Clostridiales	Ruminococcaceae	Unassigned	0.004	0.008	0.007	0	0.004	0	0.014	0	0.009	0	0.005	0	0.005	0	0.011	0.008	0.008	0	0	0.038	0	0.007
OTU1488	1.161	6.405	0.312539	0.645766	NotSig	Bacteria	Firmicutes	Clostridia	Clostridiales	Lachnospiraceae	Unassigned	0.006	0.002	0.029	0	0.018	0.002	0	0.003	0.002	0	0.002	0.002	0	0	0	0.016	0	0	0	0.004	0.002	0
OTU932	1.379	5.845	0.313198	0.646364	NotSig	Bacteria	Firmicutes	Clostridia	Clostridiales	Ruminococcaceae	Unassigned	0.002	0	0	0	0.002	0.012	0	0	0	0	0.002	0	0	0.003	0	0	0	0	0	0.002	0	0
OTU1100	-1.242	6.347	0.313792	0.646826	NotSig	Bacteria	Firmicutes	Unassigned	Unassigned	Unassigned	Unassigned	0.002	0.005	0.007	0.007	0.002	0	0.005	0	0	0	0	0	0	0	0.005	0	0	0.041	0	0.002	0	0.007
OTU1060	-0.78	9.307	0.314275	0.647058	NotSig	Bacteria	Firmicutes	Clostridia	Clostridiales	Lachnospiraceae	Unassigned	0.047	0.074	0.031	0.211	0.018	0.002	0.034	0.063	0.011	0.039	0.022	0.038	0.025	0.026	0.198	0.01	0.164	0.032	0.154	0.004	0.009	0.118
OTU916	1.085	6.082	0.314913	0.647609	NotSig	Bacteria	Firmicutes	Clostridia	Clostridiales	Ruminococcaceae	Unassigned	0.003	0.001	0.01	0	0.013	0	0	0	0.002	0.004	0.002	0	0	0.003	0	0.003	0.003	0	0.005	0	0	0
OTU1355	0.77	9.347	0.318075	0.653344	NotSig	Bacteria	Firmicutes	Clostridia	Clostridiales	Ruminococcaceae	Unassigned	0.081	0.045	0.096	0.213	0.124	0	0.061	0.038	0.017	0.083	0.04	0.135	0.019	0.061	0.066	0.003	0.079	0.018	0.023	0.012	0.007	0.166
OTU1574	-1.608	5.721	0.318787	0.654037	NotSig	Bacteria	Synergistetes	Synergistia	Synergistales	Synergistaceae	Cloacibacillus	0	0.001	0.002	0	0	0	0	0	0	0	0	0	0	0.014	0	0	0	0	0	0	0	0
OTU16	-0.764	12.518	0.319539	0.654812	NotSig	Bacteria	Unassigned	Unassigned	Unassigned	Unassigned	Unassigned	0.459	0.698	0.21	1.361	0.146	0.014	0.03	0.695	0.321	0.589	0.84	0.384	0.167	0.251	0.259	0.076	0.837	0.358	1.195	0.141	0.33	3.372
OTU925	0.853	6.476	0.320285	0.655572	NotSig	Bacteria	Unassigned	Unassigned	Unassigned	Unassigned	Unassigned	0.006	0.003	0.005	0.01	0.004	0	0	0.013	0.013	0.002	0	0.01	0.011	0.006	0.003	0.003	0	0.002	0	0.004	0.002	0
OTU1440	-1.056	6.526	0.321065	0.656252	NotSig	Bacteria	Firmicutes	Clostridia	Clostridiales	Lachnospiraceae	Unassigned	0.003	0.006	0	0	0	0	0	0.013	0	0.014	0.005	0	0.008	0	0.013	0	0.011	0	0.009	0.002	0.007	0.011
OTU1496	0.97	6.683	0.321368	0.656252	NotSig	Bacteria	Proteobacteria	Epsilonproteobacteria	Campylobacterales	Helicobacteraceae	Helicobacter	0.007	0.003	0.002	0.002	0.002	0.009	0	0.003	0.026	0.018	0	0.01	0	0.006	0	0	0	0.005	0	0.002	0.015	0.007
OTU720	-0.699	12.842	0.324028	0.660236	NotSig	Bacteria	Firmicutes	Clostridia	Clostridiales	Lachnospiraceae	Clostridium_XlVa	0.615	0.895	1.126	2.45	0.368	0.035	0.547	0.764	0.056	0.286	0.295	0.225	0.805	0.643	0.781	0.533	2.483	0.336	0.819	0.469	0.111	1.966
OTU732	-0.711	15.972	0.324075	0.660236	NotSig	Bacteria	Firmicutes	Clostridia	Clostridiales	Lachnospiraceae	Unassigned	4.804	7.29	2.903	0.922	3.622	0.803	4.483	4.513	7.188	1.855	4.57	17.177	2.681	4.187	3.477	1.396	11.344	1.154	22.764	1.9	11.503	12.498
OTU512	-1.19	6.468	0.324782	0.660527	NotSig	Bacteria	Bacteroidetes	Bacteroidia	Bacteroidales	Prevotellaceae	Prevotella	0.003	0.007	0.002	0.007	0.013	0	0	0	0	0	0	0.002	0.008	0.003	0.042	0	0	0.011	0	0	0.002	0
OTU1194	0.746	7.874	0.324973	0.660527	NotSig	Bacteria	Firmicutes	Clostridia	Clostridiales	Lachnospiraceae	Unassigned	0.027	0.014	0.074	0.107	0.011	0	0.011	0.015	0.006	0.004	0.035	0.004	0.011	0.009	0.024	0.01	0.03	0.011	0.014	0.006	0.009	0.016
OTU1619	-1.547	5.927	0.325583	0.660594	NotSig	Bacteria	Firmicutes	Clostridia	Clostridiales	Lachnospiraceae	Unassigned	0.001	0.002	0	0	0	0	0	0	0	0	0	0.006	0	0	0.005	0	0	0	0	0	0.002	0.016
OTU667	0.864	6.323	0.325762	0.660594	NotSig	Bacteria	Bacteroidetes	Unassigned	Unassigned	Unassigned	Unassigned	0.004	0.002	0.002	0.002	0.004	0.002	0.007	0.003	0.017	0	0.005	0	0.003	0.003	0	0	0	0.011	0.002	0.002	0	0.002
OTU1196	0.68	9.708	0.326543	0.661411	NotSig	Bacteria	Firmicutes	Clostridia	Clostridiales	Ruminococcaceae	Oscillibacter	0.1	0.06	0.115	0.232	0.101	0.166	0.054	0.091	0.081	0.104	0.03	0.022	0.076	0.161	0.047	0.063	0.046	0.007	0.002	0.099	0.062	0.032
OTU1434	1.623	5.996	0.327172	0.661918	NotSig	Bacteria	Unassigned	Unassigned	Unassigned	Unassigned	Unassigned	0.003	0.001	0	0	0	0	0	0.023	0	0.008	0	0	0.003	0.006	0	0	0	0	0	0	0	0
OTU719	0.661	11.965	0.328222	0.663274	NotSig	Bacteria	Firmicutes	Clostridia	Clostridiales	Ruminococcaceae	Unassigned	0.458	0.298	0.287	0.15	0.088	1.644	0.455	0.142	0.781	0.337	0.297	0.4	0.197	0.611	0.05	0.254	0.377	0.444	0.145	0.433	0.268	0.206
OTU1140	-1.453	6.041	0.329828	0.66575	NotSig	Bacteria	Firmicutes	Clostridia	Clostridiales	Unassigned	Unassigned	0.001	0.003	0	0	0	0	0	0	0	0	0.01	0	0.019	0	0	0.005	0.003	0	0	0.004	0	0
OTU1424	-1.238	7.105	0.330979	0.667302	NotSig	Bacteria	Firmicutes	Clostridia	Clostridiales	Lachnospiraceae	Unassigned	0.005	0.014	0	0	0	0	0.002	0.02	0.006	0	0.027	0	0.022	0	0.018	0	0.003	0.07	0	0	0	0.027
OTU1677	0.96	7.504	0.332111	0.667718	NotSig	Bacteria	Actinobacteria	Actinobacteria	Coriobacteriales	Coriobacteriaceae	Unassigned	0.018	0.009	0.005	0.012	0	0.014	0.065	0.008	0	0	0.032	0.046	0.008	0.003	0.045	0	0	0.009	0	0.002	0.013	0.014
OTU1321	-1.295	6.13	0.332247	0.667718	NotSig	Bacteria	Unassigned	Unassigned	Unassigned	Unassigned	Unassigned	0.001	0.004	0.002	0	0.004	0	0.002	0	0.002	0	0	0.002	0	0.04	0	0	0	0	0	0	0	0.002
OTU1232	0.734	7.259	0.332331	0.667718	NotSig	Bacteria	Firmicutes	Clostridia	Clostridiales	Ruminococcaceae	Unassigned	0.014	0.008	0.01	0.031	0.004	0.012	0.023	0.003	0.009	0.024	0.007	0.016	0.019	0.023	0.013	0.008	0	0	0	0.008	0.009	0.002
OTU1475	0.973	6.048	0.336215	0.674747	NotSig	Bacteria	Firmicutes	Clostridia	Clostridiales	Lachnospiraceae	Unassigned	0.003	0.001	0	0.002	0	0	0.005	0	0.002	0.008	0.002	0.008	0.005	0	0	0.003	0	0	0	0.004	0	0
OTU1605	-0.898	6.289	0.337043	0.675632	NotSig	Bacteria	Firmicutes	Clostridia	Clostridiales	Lachnospiraceae	Unassigned	0.002	0.004	0.002	0.005	0	0	0	0	0.002	0.01	0	0.004	0	0.009	0.003	0.003	0.016	0.002	0	0.008	0	0.002
OTU1608	0.591	9.264	0.338183	0.676834	NotSig	Bacteria	Actinobacteria	Actinobacteria	Coriobacteriales	Coriobacteriaceae	Unassigned	0.069	0.045	0.017	0.07	0.038	0.059	0.106	0.056	0.062	0.101	0.055	0.127	0.041	0.084	0.024	0.029	0.049	0.043	0.073	0.026	0.042	0.036
OTU1513	-1.131	5.766	0.338417	0.676834	NotSig	Bacteria	Proteobacteria	Alphaproteobacteria	Rhodospirillales	Unassigned	Unassigned	0	0.001	0	0	0	0	0	0	0.004	0	0	0	0	0.003	0	0.003	0	0	0	0.002	0.004	0
OTU1728	0.863	6.868	0.340088	0.679399	NotSig	Bacteria	Firmicutes	Clostridia	Clostridiales	Ruminococcaceae	Unassigned	0.01	0.005	0.007	0.056	0.009	0	0.002	0.003	0.002	0.006	0	0.016	0	0.017	0.008	0.005	0	0.002	0	0.008	0.004	0.005
OTU899	-1.037	6.207	0.340962	0.680367	NotSig	Bacteria	Firmicutes	Clostridia	Clostridiales	Unassigned	Unassigned	0.002	0.003	0	0.007	0.004	0	0	0	0	0	0	0.006	0.003	0	0.005	0.008	0	0	0	0.012	0.004	0.002
OTU843	1.026	6.66	0.342576	0.682808	NotSig	Bacteria	Firmicutes	Clostridia	Clostridiales	Unassigned	Unassigned	0.007	0.004	0	0.017	0	0	0.011	0	0.026	0	0.007	0.012	0.008	0	0.005	0	0.005	0.009	0	0	0	0.009
OTU213	1.155	5.878	0.343258	0.683389	NotSig	Bacteria	Unassigned	Unassigned	Unassigned	Unassigned	Unassigned	0.002	0.001	0.002	0.007	0.002	0	0	0	0	0	0	0.008	0	0	0	0	0	0.002	0	0	0	0.005
OTU192	-1.072	5.743	0.344413	0.684907	NotSig	Bacteria	Unassigned	Unassigned	Unassigned	Unassigned	Unassigned	0	0.001	0	0	0	0	0	0	0.002	0.002	0	0	0.005	0.003	0	0	0	0.005	0	0	0	0
OTU746	0.693	10.311	0.345152	0.685597	NotSig	Bacteria	Firmicutes	Clostridia	Clostridiales	Unassigned	Unassigned	0.155	0.084	0.053	0.182	0.072	0.002	0.156	0.074	0.212	0.309	0.131	0.354	0.079	0.02	0.063	0.044	0.06	0.038	0.068	0.038	0.396	0.034
OTU1145	-1.107	6.334	0.346242	0.686982	NotSig	Bacteria	Firmicutes	Clostridia	Clostridiales	Unassigned	Unassigned	0.002	0.005	0	0.015	0	0	0	0	0.004	0	0	0.004	0.003	0.003	0	0.021	0.003	0	0	0.014	0	0.002
OTU1224	1.268	5.691	0.347489	0.688452	NotSig	Bacteria	Firmicutes	Negativicutes	Selenomonadales	Veillonellaceae	Megasphaera	0.001	0	0	0	0	0	0	0.005	0	0	0.005	0	0	0	0	0	0	0.002	0	0	0	0
OTU534	-0.742	10.475	0.34777	0.688452	NotSig	Bacteria	Bacteroidetes	Bacteroidia	Bacteroidales	Prevotellaceae	Prevotella	0.109	0.186	0.115	0.085	0.052	0.061	0.038	0.411	0.006	0.102	0.208	0.012	0.644	0.184	0.171	0.005	0.12	0.561	0.014	0.008	0.088	0.066
OTU253	1.079	5.678	0.348172	0.688467	NotSig	Bacteria	Firmicutes	Clostridia	Clostridiales	Syntrophomonadaceae	Syntrophomonas	0.001	0	0.002	0.005	0	0	0	0	0	0	0	0.002	0	0.003	0	0	0	0	0	0	0	0
OTU52	-0.733	9.414	0.349156	0.688918	NotSig	Bacteria	Spirochaetes	Spirochaetia	Spirochaetales	Spirochaetaceae	Treponema	0.048	0.078	0.019	0.08	0.103	0.033	0.004	0.053	0.019	0.026	0.027	0.113	0.033	0.291	0.008	0.042	0.008	0.077	0.016	0.057	0.243	0.005
OTU1738	1.107	6.401	0.349188	0.688918	NotSig	Bacteria	Firmicutes	Clostridia	Clostridiales	Clostridiales_Incertae_Sedis_XI	Anaerococcus	0.006	0.002	0.005	0.036	0.009	0	0.002	0	0	0	0.005	0.002	0	0	0.013	0	0	0.002	0	0	0	0.009
OTU10	0.732	9.139	0.350561	0.690846	NotSig	Bacteria	Spirochaetes	Spirochaetia	Spirochaetales	Spirochaetaceae	Treponema	0.067	0.041	0.053	0.148	0.063	0.117	0	0.056	0.041	0.138	0.042	0.008	0.052	0.11	0.005	0.039	0.005	0.124	0.005	0.042	0.018	0.007
OTU1341	1.083	5.688	0.352606	0.694094	NotSig	Bacteria	Unassigned	Unassigned	Unassigned	Unassigned	Unassigned	0.001	0	0.002	0	0.002	0	0	0	0.004	0	0	0	0	0	0	0	0	0	0	0	0.002	0
OTU1019	-0.676	9.8	0.354017	0.695635	NotSig	Bacteria	Firmicutes	Clostridia	Clostridiales	Lachnospiraceae	Unassigned	0.069	0.106	0.175	0.012	0.099	0.005	0.029	0.063	0.009	0.134	0.099	0.068	0.074	0.285	0.079	0.112	0.252	0.034	0.023	0.113	0.004	0.088
OTU682	-0.668	7.114	0.354461	0.695635	NotSig	Bacteria	Bacteroidetes	Bacteroidia	Bacteroidales	Porphyromonadaceae	Unassigned	0.008	0.011	0.019	0.017	0.002	0.002	0.004	0.003	0.002	0.016	0.005	0.008	0.011	0.003	0.013	0.01	0.014	0.005	0	0.008	0.02	0.027
OTU429	-0.681	9.84	0.354583	0.695635	NotSig	Bacteria	Bacteroidetes	Bacteroidia	Bacteroidales	Porphyromonadaceae	Unassigned	0.072	0.117	0.062	0.208	0.072	0.019	0.068	0.041	0.021	0.187	0.002	0.038	0.134	0.568	0.055	0.089	0.107	0.097	0.03	0.049	0.038	0.007
OTU409	-0.933	10.383	0.355445	0.696117	NotSig	Bacteria	Bacteroidetes	Bacteroidia	Bacteroidales	Prevotellaceae	Prevotella	0.085	0.185	0.005	0.017	0.011	0.375	0.063	0.304	0	0.043	0.022	0.01	0.936	0.012	0.72	0.021	0.063	0.068	0	0.01	0.004	0.02
OTU1431	-0.761	6.936	0.35595	0.696117	NotSig	Bacteria	Firmicutes	Clostridia	Clostridiales	Lachnospiraceae	Unassigned	0.006	0.009	0.014	0	0	0	0.005	0.003	0	0.01	0.022	0.006	0.011	0.012	0.008	0.005	0.016	0.007	0.014	0.016	0	0.005
OTU1017	0.747	9.553	0.356023	0.696117	NotSig	Bacteria	Firmicutes	Clostridia	Clostridiales	Ruminococcaceae	Unassigned	0.092	0.053	0.215	0.148	0.11	0.012	0.014	0	0.021	0.024	0.042	0.338	0.022	0.187	0.016	0.052	0.123	0.011	0.035	0.042	0.042	0.005
OTU458	-0.763	7.993	0.357234	0.697028	NotSig	Bacteria	Bacteroidetes	Bacteroidia	Bacteroidales	Prevotellaceae	Prevotella	0.016	0.029	0.017	0.015	0.016	0.042	0.005	0.028	0	0.022	0.01	0.002	0.104	0.058	0.069	0.005	0.011	0.016	0	0.008	0.013	0.002
OTU1706	0.996	5.77	0.357287	0.697028	NotSig	Bacteria	Actinobacteria	Actinobacteria	Coriobacteriales	Coriobacteriaceae	Unassigned	0.001	0	0.002	0	0.004	0	0	0	0	0.004	0	0.002	0	0	0	0	0	0.002	0.002	0	0	0
OTU1531	-0.942	6.612	0.357989	0.697064	NotSig	Bacteria	Firmicutes	Clostridia	Clostridiales	Lachnospiraceae	Unassigned	0.004	0.007	0.017	0	0.007	0	0.002	0	0	0.008	0.005	0	0.008	0.009	0.011	0	0.027	0	0.012	0	0	0.005
OTU1526	1.266	6.034	0.358102	0.697064	NotSig	Bacteria	Firmicutes	Clostridia	Clostridiales	Ruminococcaceae	Unassigned	0.003	0.001	0.002	0	0	0.012	0	0	0	0.002	0.012	0	0	0	0	0	0	0	0	0	0.007	0.002
OTU1325	-1.381	5.684	0.358531	0.697122	NotSig	Bacteria	Firmicutes	Clostridia	Clostridiales	Lachnospiraceae	Unassigned	0	0.001	0	0	0	0	0.002	0	0	0	0	0	0	0	0	0	0	0	0	0	0	0.009
OTU687	0.889	9.288	0.359029	0.697314	NotSig	Bacteria	Bacteroidetes	Bacteroidia	Bacteroidales	Porphyromonadaceae	Unassigned	0.078	0.042	0.065	0.157	0.029	0.012	0.054	0	0.002	0.055	0.002	0.4	0.025	0.196	0.053	0.005	0.011	0.002	0	0.006	0.119	0.002
OTU1391	-0.711	8.371	0.359549	0.69755	NotSig	Bacteria	Firmicutes	Clostridia	Clostridiales	Lachnospiraceae	Coprococcus	0.022	0.038	0.022	0.044	0.016	0	0.014	0.008	0.045	0.022	0.042	0.01	0.033	0.046	0.121	0.003	0.016	0.045	0.007	0.004	0.004	0.098
OTU1387	-0.763	8.617	0.361362	0.700289	NotSig	Bacteria	Firmicutes	Clostridia	Clostridiales	Clostridiaceae_1	Clostridium_sensu_stricto	0.025	0.04	0.017	0.012	0.031	0.063	0.007	0.018	0.015	0.051	0.022	0.016	0.014	0.043	0.005	0.154	0	0.011	0.002	0.133	0.031	0.002
OTU1415	-0.793	7.772	0.363791	0.702602	NotSig	Bacteria	Firmicutes	Clostridia	Clostridiales	Ruminococcaceae	Ruminococcus	0.013	0.022	0.055	0	0.011	0.012	0.022	0.003	0.011	0	0.002	0.016	0.011	0.003	0.013	0.003	0.025	0.052	0.009	0	0.022	0.082
OTU539	1.367	5.831	0.364345	0.702602	NotSig	Bacteria	Bacteroidetes	Bacteroidia	Bacteroidales	Prevotellaceae	Prevotella	0.002	0.001	0	0.017	0.002	0	0	0	0	0	0	0	0.003	0	0.003	0	0	0	0	0	0	0
OTU499	0.575	9.086	0.364364	0.702602	NotSig	Bacteria	Bacteroidetes	Unassigned	Unassigned	Unassigned	Unassigned	0.061	0.04	0.057	0.034	0.025	0.047	0.036	0.099	0.047	0.136	0.02	0.113	0.055	0.055	0.053	0.071	0.033	0.038	0.021	0.047	0.009	0.02
OTU114	-0.636	7.823	0.365006	0.702602	NotSig	Bacteria	Firmicutes	Clostridia	Clostridiales	Peptococcaceae_1	Peptococcus	0.015	0.021	0.012	0.012	0.004	0.005	0.009	0.018	0.009	0.043	0.03	0.006	0.005	0.026	0.008	0.01	0.038	0.016	0.07	0.012	0.009	0.014
OTU572	-1.282	5.796	0.365032	0.702602	NotSig	Bacteria	Bacteroidetes	Bacteroidia	Bacteroidales	Prevotellaceae	Prevotella	0	0.002	0	0.002	0.002	0	0	0	0	0	0	0	0.014	0	0	0.003	0	0	0	0	0	0
OTU738	-0.695	13.358	0.365292	0.702602	NotSig	Bacteria	Firmicutes	Clostridia	Clostridiales	Lachnospiraceae	Unassigned	0.835	1.346	0.6	1.029	0.299	0.089	0.739	0.746	0.43	0.664	3.442	0.312	1.07	0.599	5.456	0.034	1.947	1.174	1.63	0.024	0.102	1.426
OTU865	-1.024	7.673	0.365369	0.702602	NotSig	Bacteria	Firmicutes	Clostridia	Clostridiales	Ruminococcaceae	Unassigned	0.011	0.023	0	0.056	0	0	0.004	0.03	0	0	0.002	0.02	0	0.04	0.103	0	0.025	0	0.012	0.002	0.004	0.041
OTU119	-1.299	8.999	0.366024	0.702954	NotSig	Bacteria	Unassigned	Unassigned	Unassigned	Unassigned	Unassigned	0.03	0.06	0.165	0.007	0.016	0	0	0	0	0	0	0.109	0.011	0	0	0.005	0.252	0	0.325	0.006	0	0
OTU1595	-1.11	5.657	0.366584	0.702954	NotSig	Bacteria	Unassigned	Unassigned	Unassigned	Unassigned	Unassigned	0	0.001	0	0	0	0	0.002	0	0	0	0	0	0.005	0	0	0.003	0	0	0	0	0	0
OTU146	-0.952	6.973	0.366966	0.702954	NotSig	Bacteria	Unassigned	Unassigned	Unassigned	Unassigned	Unassigned	0.005	0.01	0.007	0.007	0.004	0	0	0.008	0.008	0	0	0.02	0.005	0.006	0.013	0	0	0	0.005	0.008	0	0.066
OTU1472	-0.881	6.409	0.367161	0.702954	NotSig	Bacteria	Firmicutes	Clostridia	Clostridiales	Lachnospiraceae	Unassigned	0.003	0.005	0	0.005	0	0	0.002	0.003	0.002	0.004	0	0.012	0.019	0	0.008	0.003	0	0	0.014	0.002	0.004	0
OTU715	-0.574	10.989	0.368876	0.705466	NotSig	Bacteria	Firmicutes	Clostridia	Clostridiales	Ruminococcaceae	Oscillibacter	0.166	0.226	0.27	0.119	0.146	0.061	0.108	0.249	0.073	0.156	0.27	0.213	0.139	0.291	0.359	0.413	0.153	0.101	0.068	0.55	0.051	0.138
OTU735	-0.595	12.487	0.370763	0.708299	NotSig	Bacteria	Firmicutes	Clostridia	Clostridiales	Clostridiaceae_1	Clostridium_sensu_stricto	0.466	0.645	0.519	0.237	0.173	0.141	0.416	0.147	0.817	1.163	0.513	0.533	0.374	0.305	0.227	0.332	0.601	0.293	1.102	0.299	0.663	2.254
OTU1435	-1.125	6.401	0.37138	0.708703	NotSig	Bacteria	Firmicutes	Clostridia	Clostridiales	Ruminococcaceae	Clostridium_IV	0.002	0.005	0	0	0	0	0	0.023	0.002	0	0	0	0	0.012	0.008	0	0.005	0	0.007	0	0.018	0.002
OTU895	-1.225	6.514	0.371848	0.708823	NotSig	Bacteria	Unassigned	Unassigned	Unassigned	Unassigned	Unassigned	0.003	0.006	0	0.01	0	0	0.005	0	0	0	0	0.012	0	0.014	0	0.005	0	0	0	0.002	0.038	0
OTU178	-1.132	6.209	0.372517	0.709325	NotSig	Bacteria	Unassigned	Unassigned	Unassigned	Unassigned	Unassigned	0.002	0.005	0.012	0.002	0	0	0	0.005	0	0	0	0	0.008	0.026	0.005	0	0	0.007	0	0	0	0
OTU1343	-1.097	5.667	0.374308	0.710598	NotSig	Bacteria	Firmicutes	Clostridia	Clostridiales	Eubacteriaceae	Eubacterium	0	0.001	0	0.002	0	0	0	0	0	0	0	0	0	0	0	0.003	0.003	0	0.002	0	0	0
OTU1133	-0.974	5.966	0.374347	0.710598	NotSig	Bacteria	Firmicutes	Clostridia	Clostridiales	Ruminococcaceae	Unassigned	0.001	0.002	0	0.002	0	0	0.004	0	0.002	0	0.002	0	0	0.003	0	0.01	0	0	0.002	0.006	0	0
OTU1504	0.831	6.007	0.374406	0.710598	NotSig	Bacteria	Firmicutes	Clostridia	Clostridiales	Ruminococcaceae	Clostridium_IV	0.003	0.001	0	0.002	0	0	0.004	0	0	0.008	0.007	0.004	0	0	0.003	0	0	0.002	0.002	0.002	0.002	0
OTU1310	-1.093	5.666	0.375363	0.711642	NotSig	Bacteria	Firmicutes	Clostridia	Clostridiales	Ruminococcaceae	Clostridium_IV	0	0.001	0	0.002	0	0	0	0	0	0	0	0	0.003	0	0	0	0.005	0	0	0	0	0
OTU1456	0.872	6.95	0.377834	0.715551	NotSig	Bacteria	Firmicutes	Clostridia	Clostridiales	Ruminococcaceae	Clostridium_IV	0.011	0.006	0.014	0.051	0	0.009	0	0.018	0	0.004	0.002	0.012	0.019	0.003	0.011	0	0.005	0.018	0.002	0	0	0
OTU1283	0.987	6.417	0.379103	0.716676	NotSig	Bacteria	Firmicutes	Clostridia	Clostridiales	Ruminococcaceae	Unassigned	0.006	0.002	0.012	0.007	0	0	0	0.033	0	0	0.002	0.004	0	0.003	0	0.008	0	0	0	0.002	0.009	0.002
OTU1404	-0.889	8.073	0.379248	0.716676	NotSig	Bacteria	Firmicutes	Clostridia	Clostridiales	Ruminococcaceae	Unassigned	0.017	0.028	0.033	0.002	0.013	0	0.007	0.005	0.004	0.077	0	0.026	0.008	0.006	0.05	0	0.101	0.002	0.077	0	0	0.039
OTU141	-0.972	7.245	0.38041	0.717633	NotSig	Bacteria	Unassigned	Unassigned	Unassigned	Unassigned	Unassigned	0.007	0.014	0.002	0.017	0.004	0	0	0.028	0	0	0	0.022	0.008	0	0.003	0	0.003	0.081	0.014	0.006	0	0.029
OTU415	1.053	7.79	0.380576	0.717633	NotSig	Bacteria	Bacteroidetes	Bacteroidia	Bacteroidales	Prevotellaceae	Prevotella	0.025	0.012	0	0.015	0	0.012	0.036	0.157	0.002	0	0.027	0	0.027	0	0	0.013	0	0.068	0	0.004	0	0.009
OTU468	-0.807	8.852	0.381411	0.717828	NotSig	Bacteria	Bacteroidetes	Bacteroidia	Bacteroidales	Porphyromonadaceae	Parabacteroides	0.033	0.06	0.033	0.165	0.047	0	0	0.018	0.017	0.02	0	0.026	0.087	0.369	0.008	0.047	0.036	0.005	0.005	0.018	0.015	0.007
OTU168	0.989	6.343	0.382632	0.717828	NotSig	Bacteria	Firmicutes	Bacilli	Lactobacillales	Leuconostocaceae	Weissella	0.005	0.002	0	0	0.002	0	0.002	0.003	0.002	0	0.03	0.01	0.003	0	0	0.003	0	0	0	0.006	0	0.009
OTU626	0.679	8.982	0.382639	0.717828	NotSig	Bacteria	Firmicutes	Erysipelotrichia	Erysipelotrichales	Erysipelotrichaceae	Unassigned	0.057	0.035	0.062	0.063	0.016	0.014	0.013	0.053	0.173	0.081	0.055	0.042	0	0.02	0.021	0.005	0.044	0.056	0.056	0.004	0.004	0.136
OTU1402	-0.725	7.911	0.382709	0.717828	NotSig	Bacteria	Firmicutes	Clostridia	Clostridiales	Unassigned	Unassigned	0.015	0.023	0.026	0.012	0.038	0.012	0.005	0.038	0	0.01	0.007	0.002	0	0.063	0.003	0.052	0.008	0.007	0.012	0.059	0.015	0.009
OTU1065	-0.9	6.605	0.383497	0.717828	NotSig	Bacteria	Firmicutes	Clostridia	Clostridiales	Ruminococcaceae	Unassigned	0.004	0.006	0.002	0.01	0	0	0.005	0.003	0	0.002	0.005	0.01	0.003	0	0	0	0.016	0	0.028	0.002	0.011	0
OTU1566	1.127	5.899	0.383519	0.717828	NotSig	Bacteria	Synergistetes	Synergistia	Synergistales	Synergistaceae	Cloacibacillus	0.002	0.001	0.002	0	0.004	0.012	0	0	0	0	0	0	0	0.003	0	0.003	0	0	0	0	0.002	0
OTU413	0.615	9.514	0.383666	0.717828	NotSig	Bacteria	Bacteroidetes	Bacteroidia	Bacteroidales	Prevotellaceae	Prevotella	0.084	0.056	0.022	0.194	0.067	0.054	0.102	0.101	0.085	0.061	0.042	0.117	0.191	0.135	0.047	0.024	0.011	0.034	0.005	0.014	0.093	0.009
OTU1746	-1.068	5.665	0.383964	0.717828	NotSig	Bacteria	Bacteroidetes	Bacteroidia	Bacteroidales	Porphyromonadaceae	Unassigned	0	0.001	0	0	0	0	0	0	0.002	0	0	0	0.005	0	0	0	0	0	0	0	0.002	0
OTU63	0.764	6.722	0.38509	0.719165	NotSig	Bacteria	Firmicutes	Clostridia	Unassigned	Unassigned	Unassigned	0.007	0.004	0.002	0.007	0.004	0.009	0.002	0.008	0.004	0	0.01	0.028	0	0.009	0	0.013	0	0.002	0.002	0.012	0.002	0
OTU1183	-0.805	8.097	0.38576	0.719647	NotSig	Bacteria	Firmicutes	Clostridia	Clostridiales	Lachnospiraceae	Unassigned	0.018	0.027	0.014	0.002	0.007	0.002	0.013	0.003	0.017	0.104	0.01	0.004	0.016	0.017	0	0.005	0.09	0.025	0.115	0.004	0	0.002
OTU686	-0.894	5.822	0.386335	0.719951	NotSig	Bacteria	Bacteroidetes	Bacteroidia	Bacteroidales	Porphyromonadaceae	Unassigned	0.001	0.002	0	0	0.002	0.002	0.002	0	0	0	0	0	0	0.003	0	0.005	0.005	0.002	0	0	0	0
OTU830	1.315	6.69	0.388896	0.723951	NotSig	Bacteria	Firmicutes	Clostridia	Clostridiales	Unassigned	Unassigned	0.009	0.003	0	0.005	0	0	0.056	0	0	0	0.025	0	0.003	0	0.003	0	0	0.029	0	0	0	0
OTU522	-1.05	5.663	0.389509	0.724292	NotSig	Bacteria	Bacteroidetes	Bacteroidia	Bacteroidales	Bacteroidaceae	Bacteroides	0	0.001	0	0	0	0	0	0	0.002	0	0	0	0.008	0	0	0	0	0	0	0	0	0
OTU654	-0.945	6.389	0.390404	0.724292	NotSig	Bacteria	Bacteroidetes	Unassigned	Unassigned	Unassigned	Unassigned	0.003	0.006	0	0.007	0.002	0	0	0.005	0	0.006	0	0.006	0.008	0.04	0	0	0.005	0.002	0	0.002	0	0
OTU1611	-1.428	5.804	0.390634	0.724292	NotSig	Bacteria	Firmicutes	Clostridia	Clostridiales	Lachnospiraceae	Unassigned	0	0.002	0	0	0	0	0.002	0	0	0	0.002	0	0	0	0	0	0.016	0	0	0	0	0
OTU829	1.18	7.818	0.390941	0.724292	NotSig	Bacteria	Firmicutes	Clostridia	Clostridiales	Unassigned	Unassigned	0.026	0.011	0	0.002	0	0	0.014	0.003	0	0.041	0.201	0	0.005	0	0.003	0	0	0	0	0.002	0.002	0.093
OTU186	-1.068	5.915	0.391597	0.724292	NotSig	Bacteria	Spirochaetes	Spirochaetia	Spirochaetales	Spirochaetaceae	Treponema	0.001	0.002	0	0	0	0	0.004	0	0	0	0.005	0	0.008	0	0	0.003	0	0	0	0.002	0.007	0
OTU1396	0.686	7.982	0.392112	0.724292	NotSig	Bacteria	Firmicutes	Clostridia	Clostridiales	Ruminococcaceae	Unassigned	0.027	0.017	0.017	0.085	0.018	0.009	0.043	0.008	0.004	0.055	0	0.034	0.035	0.081	0.005	0.01	0.003	0.005	0.002	0.01	0.013	0.005
OTU1563	-1.048	5.67	0.39225	0.724292	NotSig	Bacteria	Firmicutes	Clostridia	Clostridiales	Ruminococcaceae	Unassigned	0	0.001	0	0	0	0	0	0	0	0	0.002	0	0.003	0	0	0	0.005	0	0	0	0	0
OTU1103	0.648	9.179	0.392394	0.724292	NotSig	Bacteria	Firmicutes	Clostridia	Clostridiales	Ruminococcaceae	Oscillibacter	0.065	0.039	0.077	0.024	0.061	0.049	0.208	0.018	0.118	0.016	0.012	0.062	0.008	0.115	0.003	0.044	0.019	0.009	0.009	0.044	0.119	0.023
OTU196	1.236	5.906	0.394817	0.727997	NotSig	Bacteria	Unassigned	Unassigned	Unassigned	Unassigned	Unassigned	0.002	0.001	0	0	0	0	0	0	0.002	0	0	0.018	0	0	0.003	0	0	0.002	0.002	0	0	0
OTU1499	0.839	6.084	0.395679	0.728817	NotSig	Bacteria	Firmicutes	Clostridia	Clostridiales	Ruminococcaceae	Unassigned	0.003	0.002	0.002	0.01	0	0.002	0.007	0	0.002	0.002	0.005	0	0	0.012	0	0	0	0	0	0.002	0.002	0
OTU1	0.789	13.002	0.397491	0.731384	NotSig	Bacteria	Firmicutes	Bacilli	Lactobacillales	Lactobacillaceae	Lactobacillus	0.98	0.544	0.151	0.869	0.186	0.009	0.02	0.063	3.797	0.01	0.439	4.255	0.003	0.043	0.952	0.248	0.238	0.14	0.957	0.443	1.194	1.222
OTU408	-0.78	10.871	0.398151	0.731661	NotSig	Bacteria	Bacteroidetes	Bacteroidia	Bacteroidales	Porphyromonadaceae	Unassigned	0.14	0.269	0.098	0.259	0.164	0.002	0.319	0.19	0.135	0.211	0	0.024	0.289	2.089	0.063	0.089	0.052	0.002	0.002	0.038	0.035	0.034
OTU1427	-1.128	7.254	0.3989	0.731661	NotSig	Bacteria	Firmicutes	Clostridia	Clostridiales	Lachnospiraceae	Coprococcus	0.007	0.016	0	0.027	0	0	0.007	0.023	0	0	0.015	0	0.016	0	0.021	0	0	0.106	0	0	0	0.018
OTU1422	0.64	7.01	0.399179	0.731661	NotSig	Bacteria	Firmicutes	Clostridia	Clostridiales	Ruminococcaceae	Unassigned	0.01	0.006	0.017	0.002	0.018	0.007	0.022	0.003	0.002	0.008	0.02	0.006	0.005	0.012	0	0.003	0	0.014	0.005	0.004	0.018	0.002
OTU1691	-0.629	6.491	0.399382	0.731661	NotSig	Bacteria	Firmicutes	Clostridia	Clostridiales	Ruminococcaceae	Unassigned	0.003	0.005	0.005	0.005	0.002	0.005	0.005	0.003	0.004	0	0	0.006	0.005	0.017	0	0.005	0.003	0.009	0.002	0.008	0.004	0
OTU22	-1.185	14.471	0.40038	0.731661	NotSig	Bacteria	Spirochaetes	Spirochaetia	Spirochaetales	Spirochaetaceae	Treponema	1.336	2.611	3.004	0.068	9.735	0.056	0.009	0	0.019	0.02	0.171	0.282	0.177	0	0	10.893	0	0.009	0	14.278	0.75	0.002
OTU470	1.338	6.457	0.400844	0.731661	NotSig	Bacteria	Bacteroidetes	Unassigned	Unassigned	Unassigned	Unassigned	0.006	0.002	0	0.005	0	0.028	0.004	0	0	0	0.022	0	0	0	0	0	0	0.025	0	0	0	0
OTU942	-0.755	9.125	0.401005	0.731661	NotSig	Bacteria	Firmicutes	Clostridia	Clostridiales	Ruminococcaceae	Unassigned	0.038	0.062	0.053	0.012	0.061	0	0.013	0.005	0.019	0.012	0.047	0.161	0.147	0.009	0.003	0.013	0.213	0.011	0.199	0.012	0.002	0.007
OTU566	-1.013	5.656	0.40117	0.731661	NotSig	Bacteria	Bacteroidetes	Bacteroidia	Bacteroidales	Prevotellaceae	Prevotella	0	0.001	0	0	0	0	0	0	0	0	0	0.002	0	0	0.008	0	0	0	0	0	0	0
OTU49	0.651	13.253	0.401409	0.731661	NotSig	Bacteria	Bacteroidetes	Bacteroidia	Bacteroidales	Porphyromonadaceae	Unassigned	1.286	0.683	0.866	6.294	0.281	0.473	0.629	0.429	0.554	1.352	0.283	1.704	0.598	0.3	0.876	1.875	0.107	0.101	0.012	2.286	0.506	0.166
OTU854	-0.64	8.036	0.402268	0.731776	NotSig	Bacteria	Firmicutes	Clostridia	Clostridiales	Ruminococcaceae	Unassigned	0.017	0.024	0.007	0.044	0.013	0.014	0.002	0.008	0.024	0.028	0.027	0.006	0.005	0.037	0.005	0.071	0.016	0.007	0.016	0.071	0.011	0.002
OTU1487	-0.929	6.006	0.402309	0.731776	NotSig	Bacteria	Firmicutes	Clostridia	Clostridiales	Lachnospiraceae	Unassigned	0.001	0.003	0	0	0	0	0	0	0	0.008	0.002	0.002	0.005	0	0.008	0.003	0.008	0	0	0.002	0	0
OTU868	-1.271	7.225	0.403417	0.733027	NotSig	Bacteria	Firmicutes	Clostridia	Clostridiales	Unassigned	Unassigned	0.006	0.016	0.002	0	0	0	0	0.005	0	0	0.055	0	0.019	0	0.003	0	0	0.137	0	0	0	0.005
OTU1264	1.741	8.012	0.406056	0.737057	NotSig	Bacteria	Firmicutes	Clostridia	Clostridiales	Ruminococcaceae	Ruminococcus	0.028	0.011	0	0	0	0.283	0	0	0	0	0	0	0	0	0	0	0	0.108	0	0	0	0
OTU1090	0.602	9.173	0.407928	0.739688	NotSig	Bacteria	Firmicutes	Clostridia	Clostridiales	Ruminococcaceae	Unassigned	0.068	0.041	0.115	0.068	0.038	0.005	0.039	0.013	0.064	0.238	0.005	0.099	0.049	0.009	0.053	0.063	0.049	0.061	0.047	0.057	0.015	0.005
OTU898	0.916	5.922	0.409234	0.741283	NotSig	Bacteria	Firmicutes	Clostridia	Clostridiales	Unassigned	Unassigned	0.002	0.001	0	0.005	0	0	0.005	0	0.006	0	0	0.004	0	0	0	0	0	0.005	0.002	0	0	0.002
OTU368	-0.707	9.4	0.40983	0.741283	NotSig	Bacteria	Bacteroidetes	Bacteroidia	Bacteroidales	Prevotellaceae	Unassigned	0.049	0.085	0	0.15	0.018	0.103	0.016	0.124	0.03	0.01	0.03	0.004	0.057	0.231	0.396	0.005	0.025	0.038	0.009	0.012	0.075	0.005
OTU1478	0.671	7.026	0.41008	0.741283	NotSig	Bacteria	Firmicutes	Clostridia	Clostridiales	Lachnospiraceae	Unassigned	0.011	0.007	0.005	0.041	0.004	0	0.002	0	0.008	0.012	0.027	0.012	0.005	0.023	0.003	0.005	0.011	0.007	0.009	0.002	0	0.002
OTU1463	0.883	6.223	0.411281	0.741283	NotSig	Bacteria	Firmicutes	Clostridia	Clostridiales	Unassigned	Unassigned	0.004	0.002	0.005	0	0.002	0	0.025	0.005	0	0	0	0.002	0.008	0	0.005	0	0	0.002	0	0.002	0	0.002
OTU1740	0.867	7.119	0.411557	0.741283	NotSig	Archaea	Euryarchaeota	Methanobacteria	Methanobacteriales	Methanobacteriaceae	Methanobrevibacter	0.012	0.007	0.029	0.002	0.043	0.03	0	0	0.008	0.006	0	0	0	0.02	0.011	0	0.011	0.007	0.014	0	0.004	0
OTU3	-0.758	11.9	0.411678	0.741283	NotSig	Bacteria	Firmicutes	Negativicutes	Selenomonadales	Veillonellaceae	Unassigned	0.295	0.483	0.263	0.007	0.128	0.07	0.599	1.659	0.002	0.016	0.191	0.014	0.964	0.012	0.206	0.094	1.08	1.456	0.788	0.061	0.002	0.168
OTU1320	0.977	5.881	0.412195	0.741283	NotSig	Bacteria	Unassigned	Unassigned	Unassigned	Unassigned	Unassigned	0.002	0.001	0.007	0	0	0	0	0	0	0.004	0.002	0.006	0	0	0	0	0.003	0	0	0	0.004	0
OTU826	0.601	8.26	0.4125	0.741283	NotSig	Bacteria	Firmicutes	Unassigned	Unassigned	Unassigned	Unassigned	0.033	0.02	0.069	0.005	0.045	0.012	0.038	0.018	0.024	0.035	0.057	0.022	0.104	0.017	0.008	0.01	0.008	0.005	0.005	0.032	0.009	0.007
OTU1107	-0.745	8.142	0.412625	0.741283	NotSig	Bacteria	Firmicutes	Clostridia	Clostridiales	Ruminococcaceae	Oscillibacter	0.018	0.034	0.026	0.022	0.009	0	0.004	0.023	0.028	0.022	0.015	0.034	0.03	0.158	0.103	0.013	0.019	0	0.002	0.01	0	0
OTU1073	0.644	9.63	0.413533	0.741632	NotSig	Bacteria	Firmicutes	Clostridia	Clostridiales	Ruminococcaceae	Oscillibacter	0.093	0.056	0.184	0.097	0.126	0.124	0.007	0.051	0.049	0.091	0.025	0.175	0.041	0.029	0.185	0.115	0.014	0	0.002	0.135	0.018	0.02
OTU969	1.023	5.884	0.413668	0.741632	NotSig	Bacteria	Firmicutes	Clostridia	Clostridiales	Ruminococcaceae	Unassigned	0.002	0.001	0	0.005	0	0	0	0	0	0.002	0	0.012	0	0	0.003	0	0	0	0	0.002	0.002	0
OTU1484	0.85	6.345	0.414518	0.742394	NotSig	Bacteria	Firmicutes	Clostridia	Clostridiales	Ruminococcaceae	Unassigned	0.005	0.003	0.002	0.012	0.004	0.009	0.013	0.003	0	0.004	0	0	0	0.014	0.008	0	0.005	0	0	0	0	0
OTU55	1.48	8.138	0.415398	0.743209	NotSig	Bacteria	Spirochaetes	Spirochaetia	Spirochaetales	Spirochaetaceae	Treponema	0.036	0.011	0.158	0	0.2	0	0	0	0	0	0	0	0	0	0.029	0	0	0	0	0	0.08	0
OTU751	-0.536	10.473	0.416224	0.743747	NotSig	Bacteria	Firmicutes	Clostridia	Clostridiales	Unassigned	Unassigned	0.117	0.157	0.134	0.133	0.049	0.126	0.156	0.231	0.047	0.158	0.025	0.107	0.06	0.271	0.066	0.081	0.079	0.088	0.054	0.073	0.365	0.431
OTU239	-1.154	7.459	0.41655	0.743747	NotSig	Bacteria	Firmicutes	Bacilli	Lactobacillales	Lactobacillaceae	Lactobacillus	0.008	0.015	0.002	0.005	0.002	0	0	0	0.008	0	0.002	0.058	0	0	0	0	0.008	0	0.002	0	0.139	0
OTU736	0.776	13.397	0.417917	0.744288	NotSig	Bacteria	Firmicutes	Clostridia	Clostridiales	Ruminococcaceae	Ruminococcus	1.361	0.72	3.595	0.015	6.978	0.002	0.185	0.933	0.054	0.091	1.747	0.008	0.358	1.196	0.003	1.506	0.29	0.552	0.269	2.414	0.243	0.367
OTU1263	-0.871	7.832	0.418309	0.744288	NotSig	Bacteria	Firmicutes	Clostridia	Clostridiales	Ruminococcaceae	Unassigned	0.012	0.022	0	0.005	0.002	0.066	0.023	0.003	0.015	0.004	0	0	0.016	0.04	0.003	0.029	0	0.005	0	0.018	0.106	0
OTU1130	-1.077	6.33	0.418883	0.744288	NotSig	Bacteria	Firmicutes	Unassigned	Unassigned	Unassigned	Unassigned	0.002	0.006	0	0	0	0.005	0.009	0.008	0	0	0	0	0.005	0.04	0.008	0	0	0	0	0	0.002	0
OTU643	-1.097	6.023	0.418897	0.744288	NotSig	Bacteria	Bacteroidetes	Unassigned	Unassigned	Unassigned	Unassigned	0.001	0.003	0	0	0	0	0.002	0	0	0	0.01	0	0	0	0	0	0.011	0.002	0	0	0.002	0.011
OTU1568	-0.97	5.663	0.418982	0.744288	NotSig	Bacteria	Firmicutes	Clostridia	Clostridiales	Ruminococcaceae	Clostridium_III	0	0.001	0	0	0.002	0	0	0	0	0	0	0	0.003	0	0	0	0	0.002	0	0	0.002	0
OTU68	-1.54	6.59	0.419974	0.745294	NotSig	Bacteria	Spirochaetes	Spirochaetia	Spirochaetales	Spirochaetaceae	Treponema	0.002	0.006	0	0	0.022	0	0	0	0	0	0	0	0	0	0	0.029	0	0	0	0.036	0	0
OTU503	0.588	10.304	0.420406	0.745303	NotSig	Bacteria	Bacteroidetes	Unassigned	Unassigned	Unassigned	Unassigned	0.142	0.103	0.036	0.073	0.031	0.541	0.066	0.304	0.096	0.193	0.067	0.01	0.098	0.363	0.1	0.016	0.077	0.095	0.07	0.016	0.042	0.156
OTU1578	1.014	5.892	0.422121	0.746913	NotSig	Bacteria	Proteobacteria	Epsilonproteobacteria	Campylobacterales	Helicobacteraceae	Helicobacter	0.002	0.001	0	0.002	0	0	0	0	0.011	0.002	0	0.002	0	0	0	0	0	0	0	0.002	0.004	0
OTU1694	0.922	6.384	0.422445	0.746913	NotSig	Bacteria	Firmicutes	Clostridia	Clostridiales	Ruminococcaceae	Unassigned	0.005	0.002	0.019	0.007	0	0.005	0	0	0	0	0	0.022	0	0	0.005	0	0	0.002	0	0.006	0.004	0.005
OTU212	0.932	7.096	0.422596	0.746913	NotSig	Bacteria	Unassigned	Unassigned	Unassigned	Unassigned	Unassigned	0.012	0.006	0	0.017	0.002	0	0	0.023	0.015	0	0	0.062	0	0.003	0.008	0.003	0	0.018	0	0.002	0	0.029
OTU127	-0.694	7.467	0.423111	0.747069	NotSig	Bacteria	Unassigned	Unassigned	Unassigned	Unassigned	Unassigned	0.01	0.017	0.005	0.012	0.025	0.002	0.016	0	0.015	0.018	0	0.006	0.049	0	0.018	0.058	0.011	0.005	0	0.012	0.011	0.002
OTU1675	0.592	8.335	0.424707	0.747898	NotSig	Bacteria	Firmicutes	Clostridia	Clostridiales	Unassigned	Unassigned	0.034	0.019	0.029	0.022	0.016	0.023	0.025	0.01	0.045	0.063	0.022	0.08	0.011	0.009	0	0.042	0.016	0.011	0.019	0.067	0.013	0.005
OTU1105	-0.553	8.605	0.425115	0.747898	NotSig	Bacteria	Firmicutes	Clostridia	Clostridiales	Ruminococcaceae	Butyricicoccus	0.029	0.04	0.017	0.08	0.029	0	0.013	0.015	0.004	0.043	0.047	0.046	0.035	0.014	0.034	0.039	0.055	0.079	0.051	0.022	0.033	0.039
OTU1358	-0.944	5.648	0.425124	0.747898	NotSig	Bacteria	Firmicutes	Unassigned	Unassigned	Unassigned	Unassigned	0	0.001	0	0.002	0	0	0	0	0	0	0	0	0	0.003	0	0	0	0.005	0	0	0	0
OTU964	0.779	5.837	0.425862	0.747898	NotSig	Bacteria	Firmicutes	Clostridia	Clostridiales	Unassigned	Unassigned	0.002	0.001	0.002	0	0.004	0	0	0	0.002	0.004	0.002	0	0	0.003	0	0.003	0	0	0	0.002	0	0
OTU8	-0.611	11.863	0.425874	0.747898	NotSig	Bacteria	Unassigned	Unassigned	Unassigned	Unassigned	Unassigned	0.291	0.404	0.445	0.186	0.195	0.033	0.149	0.18	0.862	0.311	0.037	0.509	0.527	0.112	0.005	0.617	0.519	0.133	0.529	0.346	1.23	0.02
OTU997	-0.893	5.717	0.426451	0.747898	NotSig	Bacteria	Firmicutes	Unassigned	Unassigned	Unassigned	Unassigned	0	0.001	0.002	0	0	0	0	0	0	0.002	0	0	0	0.006	0.003	0	0	0	0	0	0.002	0
OTU1638	0.561	12.499	0.426575	0.747898	NotSig	Bacteria	Firmicutes	Clostridia	Clostridiales	Clostridiaceae_1	Clostridium_sensu_stricto	0.688	0.428	0.631	0.491	0.213	0.03	0.5	0.302	2.036	1.429	0.201	1.046	0.412	0.478	0.103	0.251	0.153	0.228	0.29	0.338	1.382	0.644
OTU1142	-0.83	6.247	0.427042	0.747966	NotSig	Bacteria	Firmicutes	Clostridia	Clostridiales	Unassigned	Unassigned	0.002	0.004	0	0.005	0.002	0.009	0.002	0	0	0	0	0.002	0.005	0.006	0	0.005	0	0	0	0.01	0.009	0
OTU1442	-0.591	6.827	0.428813	0.749051	NotSig	Bacteria	Firmicutes	Clostridia	Clostridiales	Ruminococcaceae	Unassigned	0.005	0.008	0.007	0.007	0.007	0.002	0.018	0	0.002	0	0.005	0.006	0.003	0.009	0.003	0.016	0.025	0.002	0.009	0.004	0.007	0.005
OTU1444	0.557	6.998	0.428994	0.749051	NotSig	Bacteria	Firmicutes	Clostridia	Clostridiales	Ruminococcaceae	Unassigned	0.01	0.006	0.005	0.007	0.004	0.021	0.005	0.003	0.009	0.026	0.007	0.01	0.003	0	0.003	0.013	0.005	0.018	0.009	0.004	0.004	0.005
OTU1613	-0.898	5.915	0.429191	0.749051	NotSig	Bacteria	Firmicutes	Clostridia	Clostridiales	Lachnospiraceae	Unassigned	0.001	0.002	0	0	0	0	0	0.003	0	0	0.007	0	0	0	0.008	0	0.005	0.002	0	0.002	0	0.002
OTU1681	0.687	7.834	0.429376	0.749051	NotSig	Bacteria	Firmicutes	Clostridia	Clostridiales	Ruminococcaceae	Unassigned	0.023	0.014	0.002	0.102	0.002	0.021	0.002	0.003	0.034	0.008	0.005	0.052	0.019	0.014	0.016	0.031	0.044	0.007	0.009	0.004	0	0
OTU89	-0.701	8.145	0.430031	0.749446	NotSig	Bacteria	Firmicutes	Bacilli	Lactobacillales	Streptococcaceae	Streptococcus	0.02	0.027	0.074	0.031	0.004	0.012	0.004	0	0	0.006	0.01	0.054	0.03	0	0.018	0.097	0.011	0.005	0.016	0.065	0.004	0.027
OTU1208	-0.686	6.688	0.431524	0.751299	NotSig	Bacteria	Firmicutes	Clostridia	Clostridiales	Lachnospiraceae	Unassigned	0.005	0.007	0.007	0.002	0.004	0	0	0.015	0	0	0.015	0.002	0.008	0.012	0.005	0	0.008	0.005	0.016	0.006	0	0.009
OTU920	-0.777	5.997	0.432867	0.752424	NotSig	Bacteria	Firmicutes	Clostridia	Clostridiales	Ruminococcaceae	Unassigned	0.001	0.002	0.002	0.002	0	0.002	0.004	0	0	0	0	0.002	0.003	0	0.003	0	0	0	0.002	0.002	0.011	0
OTU446	1.109	7.86	0.433031	0.752424	NotSig	Bacteria	Bacteroidetes	Bacteroidia	Bacteroidales	Porphyromonadaceae	Parabacteroides	0.022	0.013	0	0.002	0.002	0.199	0	0	0	0	0.002	0.018	0	0.072	0	0.029	0	0.007	0	0.018	0	0
OTU573	1.246	5.7	0.43447	0.754175	NotSig	Bacteria	Bacteroidetes	Bacteroidia	Bacteroidales	Prevotellaceae	Prevotella	0.001	0	0.012	0	0	0	0	0	0	0	0	0	0	0	0	0.003	0	0	0	0	0	0
OTU448	0.917	7.168	0.435488	0.754623	NotSig	Bacteria	Bacteroidetes	Bacteroidia	Bacteroidales	Prevotellaceae	Prevotella	0.013	0.007	0.012	0.056	0.061	0	0.002	0.003	0	0	0	0	0.025	0.02	0.008	0.01	0.003	0	0	0	0.007	0
OTU1179	-0.863	6.935	0.435592	0.754623	NotSig	Bacteria	Firmicutes	Clostridia	Clostridiales	Lachnospiraceae	Unassigned	0.006	0.01	0	0.002	0	0	0.009	0.028	0.002	0	0.015	0	0.008	0	0	0	0.033	0.005	0.014	0	0.009	0.027
OTU780	-0.917	6.577	0.436057	0.75468	NotSig	Bacteria	Firmicutes	Clostridia	Clostridiales	Unassigned	Unassigned	0.003	0.008	0.005	0.005	0.002	0.014	0.002	0	0	0.006	0	0	0.016	0.055	0	0	0	0	0.002	0	0.002	0
OTU293	0.543	10.11	0.436698	0.754691	NotSig	Bacteria	Unassigned	Unassigned	Unassigned	Unassigned	Unassigned	0.126	0.083	0.098	0.189	0.07	0.007	0.022	0.081	0.368	0.158	0.052	0.213	0.025	0.144	0.016	0.042	0.09	0.068	0.101	0.075	0.086	0.179
OTU1230	0.96	5.968	0.437078	0.754691	NotSig	Bacteria	Firmicutes	Clostridia	Clostridiales	Ruminococcaceae	Unassigned	0.002	0.001	0.002	0.005	0	0	0	0	0	0	0	0.016	0	0.003	0	0	0.003	0	0.002	0	0.002	0
OTU952	-0.741	5.788	0.437358	0.754691	NotSig	Bacteria	Firmicutes	Clostridia	Clostridiales	Ruminococcaceae	Unassigned	0.001	0.001	0	0.002	0	0	0	0	0	0.002	0.002	0	0.003	0	0.003	0	0.003	0	0	0.002	0	0.002
OTU344	0.939	5.757	0.439374	0.756192	NotSig	Bacteria	Unassigned	Unassigned	Unassigned	Unassigned	Unassigned	0.001	0	0	0	0.002	0.005	0	0	0	0	0	0.004	0	0	0	0.003	0	0.002	0	0	0	0
OTU436	0.616	8.066	0.440382	0.756192	NotSig	Bacteria	Bacteroidetes	Unassigned	Unassigned	Unassigned	Unassigned	0.027	0.019	0.031	0.053	0.07	0.021	0.013	0.013	0.023	0.018	0.017	0.014	0.087	0.052	0.011	0.016	0	0.016	0	0.002	0.007	0.002
OTU165	-0.924	6.234	0.440418	0.756192	NotSig	Bacteria	Proteobacteria	Deltaproteobacteria	Desulfovibrionales	Desulfovibrionaceae	Desulfovibrio	0.002	0.004	0.002	0	0.011	0	0.005	0	0	0	0	0	0	0.023	0	0.003	0.003	0.009	0	0	0	0.007
OTU108	-0.849	9.127	0.440697	0.756192	NotSig	Bacteria	Unassigned	Unassigned	Unassigned	Unassigned	Unassigned	0.036	0.064	0.005	0.019	0.018	0.002	0	0.015	0.011	0	0.02	0.268	0	0.017	0.04	0.016	0.003	0.005	0.007	0.018	0	0.54
OTU1438	-0.922	7.112	0.440755	0.756192	NotSig	Bacteria	Firmicutes	Clostridia	Clostridiales	Ruminococcaceae	Unassigned	0.007	0.01	0.007	0.031	0.002	0.002	0	0	0	0	0	0.024	0.005	0	0	0.034	0.003	0.002	0.007	0.051	0	0
OTU292	-0.763	6.427	0.44122	0.756192	NotSig	Bacteria	Unassigned	Unassigned	Unassigned	Unassigned	Unassigned	0.003	0.005	0.007	0.002	0.007	0	0	0.013	0	0	0	0.002	0.003	0.02	0	0.003	0.003	0.002	0.014	0.006	0	0
OTU1152	-0.989	5.738	0.441256	0.756192	NotSig	Bacteria	Firmicutes	Clostridia	Clostridiales	Unassigned	Unassigned	0	0.001	0	0	0	0	0.002	0.003	0	0	0	0	0	0	0	0	0	0.009	0	0	0.002	0
OTU533	-1.115	5.676	0.441944	0.756629	NotSig	Bacteria	Bacteroidetes	Bacteroidia	Bacteroidales	Prevotellaceae	Prevotella	0	0.001	0	0	0	0	0	0.003	0	0	0	0	0	0	0	0	0	0.009	0	0	0	0
OTU302	-0.899	5.651	0.443201	0.757586	NotSig	Bacteria	Firmicutes	Negativicutes	Selenomonadales	Veillonellaceae	Unassigned	0	0.001	0	0	0	0	0	0.003	0	0	0	0	0	0	0.003	0	0	0.005	0	0	0	0
OTU590	-1.111	5.677	0.44337	0.757586	NotSig	Bacteria	Bacteroidetes	Bacteroidia	Bacteroidales	Prevotellaceae	Prevotella	0	0.001	0	0	0	0	0	0	0	0	0.002	0	0	0	0	0	0	0.009	0	0	0	0
OTU381	1.297	6.1	0.444573	0.7589	NotSig	Bacteria	Bacteroidetes	Bacteroidia	Bacteroidales	Porphyromonadaceae	Parabacteroides	0.003	0.001	0	0	0	0.016	0	0.003	0	0.014	0	0	0	0.014	0	0	0	0	0	0	0	0
OTU395	-0.781	9.386	0.445057	0.758986	NotSig	Bacteria	Unassigned	Unassigned	Unassigned	Unassigned	Unassigned	0.048	0.077	0.002	0.002	0	0	0.05	0.119	0.006	0.022	0.27	0.004	0.131	0.003	0.016	0	0.063	0.11	0.159	0.008	0.002	0.277
OTU424	-1.085	8.592	0.445929	0.759732	NotSig	Bacteria	Bacteroidetes	Bacteroidia	Bacteroidales	Unassigned	Unassigned	0.023	0.05	0.017	0.087	0.02	0	0.023	0	0	0	0	0.08	0	0.305	0	0.126	0	0	0	0.067	0	0
OTU758	1.345	7.959	0.446749	0.760387	NotSig	Bacteria	Actinobacteria	Actinobacteria	Coriobacteriales	Coriobacteriaceae	Olsenella	0.03	0.009	0	0	0	0	0	0.003	0	0.002	0.278	0.018	0	0	0	0	0	0	0	0	0.093	0
OTU1395	-0.663	8.158	0.448044	0.761849	NotSig	Bacteria	Firmicutes	Clostridia	Clostridiales	Unassigned	Unassigned	0.018	0.029	0.007	0.022	0.004	0	0.007	0.036	0.073	0.028	0.002	0.004	0.011	0.075	0.005	0.078	0.005	0.027	0	0.063	0.002	0.023
OTU189	1.074	6.112	0.449225	0.763114	NotSig	Bacteria	Unassigned	Unassigned	Unassigned	Unassigned	Unassigned	0.004	0.001	0	0.027	0	0	0	0.008	0	0	0.002	0	0	0.003	0	0	0	0.002	0	0	0	0.009
OTU592	-0.795	7.212	0.450608	0.764721	NotSig	Bacteria	Bacteroidetes	Bacteroidia	Bacteroidales	Porphyromonadaceae	Unassigned	0.008	0.013	0.017	0.019	0.007	0	0	0	0.011	0	0.022	0.002	0.008	0.009	0.003	0	0	0.007	0.002	0	0.011	0.088
OTU1181	-0.866	5.791	0.451753	0.765393	NotSig	Bacteria	Firmicutes	Clostridia	Clostridiales	Ruminococcaceae	Unassigned	0.001	0.001	0	0.002	0	0	0.002	0	0	0.002	0	0	0	0	0	0	0.008	0	0.002	0	0.002	0
OTU9	0.974	11.109	0.452393	0.765393	NotSig	Bacteria	Proteobacteria	Deltaproteobacteria	Desulfovibrionales	Desulfovibrionaceae	Desulfovibrio	0.301	0.162	0.007	0	0.007	0.016	0.004	1.92	0.002	0.11	0.942	0.002	0.448	0	0	0.021	0.008	1.127	0	0.01	0	0.002
OTU1507	1.07	5.769	0.453497	0.765393	NotSig	Bacteria	Firmicutes	Clostridia	Clostridiales	Unassigned	Unassigned	0.001	0	0	0	0	0.009	0	0	0	0	0.002	0	0	0	0.003	0	0	0.002	0	0	0	0
OTU553	1.258	5.8	0.453663	0.765393	NotSig	Bacteria	Bacteroidetes	Bacteroidia	Bacteroidales	Porphyromonadaceae	Unassigned	0.001	0	0	0	0	0	0	0	0.013	0	0	0	0.003	0	0	0	0	0.002	0	0	0	0
OTU1351	0.956	5.658	0.454046	0.765393	NotSig	Bacteria	Firmicutes	Clostridia	Clostridiales	Ruminococcaceae	Unassigned	0.001	0	0.002	0	0	0.005	0	0	0	0	0	0	0	0	0	0	0	0.002	0	0	0	0
OTU629	-0.608	9.098	0.454136	0.765393	NotSig	Bacteria	Bacteroidetes	Bacteroidia	Bacteroidales	Porphyromonadaceae	Unassigned	0.042	0.06	0.06	0.128	0.018	0	0.03	0.043	0.039	0.016	0.012	0.074	0.082	0	0.05	0.05	0.033	0.205	0.087	0.059	0	0.036
OTU683	-0.813	7.818	0.454477	0.765393	NotSig	Bacteria	Bacteroidetes	Bacteroidia	Bacteroidales	Porphyromonadaceae	Unassigned	0.012	0.022	0.022	0.007	0.022	0.054	0.009	0	0.006	0.002	0.002	0	0	0.017	0.087	0	0.003	0.005	0	0	0.104	0.005
OTU523	-0.75	6.659	0.454942	0.765393	NotSig	Bacteria	Bacteroidetes	Bacteroidia	Bacteroidales	Prevotellaceae	Prevotella	0.004	0.008	0.01	0.005	0.013	0	0	0.013	0	0	0	0.002	0.014	0.009	0.037	0.005	0	0.005	0	0.004	0.002	0
OTU43	-0.941	6.016	0.455042	0.765393	NotSig	Bacteria	Proteobacteria	Unassigned	Unassigned	Unassigned	Unassigned	0.001	0.003	0	0	0.002	0	0	0	0	0.008	0.002	0	0.003	0	0.021	0	0	0.002	0	0	0	0.002
OTU197	-0.695	6.935	0.455383	0.765393	NotSig	Bacteria	Proteobacteria	Deltaproteobacteria	Desulfovibrionales	Desulfovibrionaceae	Desulfovibrio	0.006	0.01	0.002	0.005	0.011	0.009	0.023	0	0	0.004	0	0.002	0.027	0.014	0.011	0.042	0.003	0.002	0	0.002	0	0.002
OTU1174	0.93	5.672	0.456284	0.766172	NotSig	Bacteria	Firmicutes	Clostridia	Clostridiales	Ruminococcaceae	Unassigned	0.001	0	0	0	0	0	0.005	0	0	0	0	0.002	0	0	0	0	0	0	0	0.002	0	0
OTU1707	0.946	5.657	0.456836	0.766362	NotSig	Bacteria	Firmicutes	Negativicutes	Selenomonadales	Veillonellaceae	Megasphaera	0.001	0	0	0	0	0	0	0.005	0	0	0.002	0	0	0	0	0	0	0.002	0	0	0	0
OTU550	-0.805	6.005	0.458825	0.768877	NotSig	Bacteria	Bacteroidetes	Bacteroidia	Bacteroidales	Prevotellaceae	Prevotella	0.001	0.003	0.005	0.007	0.002	0	0	0	0	0	0	0	0.008	0	0.008	0.005	0	0.002	0	0	0.002	0
OTU1095	0.747	8.44	0.459215	0.768877	NotSig	Bacteria	Actinobacteria	Actinobacteria	Coriobacteriales	Coriobacteriaceae	Senegalimassilia	0.039	0.021	0.002	0.022	0.002	0.012	0.203	0.101	0	0	0.05	0	0.014	0.003	0.011	0.013	0	0.016	0.005	0.028	0.015	0.107
OTU556	-1.143	5.782	0.462266	0.773246	NotSig	Bacteria	Bacteroidetes	Bacteroidia	Bacteroidales	Prevotellaceae	Prevotella	0.001	0.001	0	0	0	0	0	0.005	0	0	0	0	0.008	0	0	0	0	0.007	0	0	0	0
OTU1131	0.657	6.247	0.464594	0.776395	NotSig	Bacteria	Firmicutes	Clostridia	Clostridiales	Ruminococcaceae	Butyricicoccus	0.004	0.002	0	0.015	0.002	0	0.005	0.003	0.006	0.002	0	0.006	0.003	0	0	0.005	0.003	0	0	0	0.007	0.005
OTU1290	-0.843	7.045	0.465192	0.77641	NotSig	Bacteria	Unassigned	Unassigned	Unassigned	Unassigned	Unassigned	0.006	0.011	0.012	0.015	0.002	0	0	0	0.024	0	0	0.008	0	0.032	0.021	0.013	0	0	0	0.016	0.027	0
OTU1559	0.858	5.766	0.465915	0.77641	NotSig	Bacteria	Firmicutes	Clostridia	Clostridiales	Ruminococcaceae	Unassigned	0.001	0	0.005	0	0	0	0.005	0.003	0	0	0	0	0	0	0	0	0	0	0.002	0	0.002	0
OTU625	-0.631	10.674	0.465935	0.77641	NotSig	Bacteria	Bacteroidetes	Bacteroidia	Bacteroidales	Prevotellaceae	Prevotella	0.132	0.188	0.344	0.203	0.236	0	0.099	0.003	0.167	0.211	0.005	0.048	0.005	0.657	0.069	0.397	0.044	0.009	0.021	0.356	0.219	0.102
OTU482	-1.252	6.375	0.466552	0.776556	NotSig	Bacteria	Bacteroidetes	Bacteroidia	Bacteroidales	Prevotellaceae	Prevotella	0.002	0.005	0	0.01	0	0	0	0	0	0	0	0.012	0	0	0	0.037	0	0	0	0.014	0	0
OTU419	0.73	8.769	0.46719	0.776556	NotSig	Bacteria	Bacteroidetes	Bacteroidia	Bacteroidales	Porphyromonadaceae	Parabacteroides	0.049	0.032	0.033	0.005	0.09	0.075	0.027	0.01	0	0.077	0.171	0	0.035	0.086	0.156	0.008	0	0	0	0.012	0.02	0.002
OTU330	-1.263	6.289	0.467355	0.776556	NotSig	Bacteria	Unassigned	Unassigned	Unassigned	Unassigned	Unassigned	0.002	0.005	0	0	0	0	0	0	0	0.006	0	0.012	0	0	0.003	0	0	0	0	0	0	0.043
OTU206	1.393	6.598	0.468439	0.777617	NotSig	Bacteria	Firmicutes	Negativicutes	Selenomonadales	Veillonellaceae	Dialister	0.008	0.002	0	0	0	0	0	0	0	0	0.067	0.01	0	0	0	0	0	0	0	0	0.022	0
OTU1676	-0.547	9.57	0.469389	0.777867	NotSig	Bacteria	Actinobacteria	Actinobacteria	Coriobacteriales	Coriobacteriaceae	Unassigned	0.061	0.076	0.067	0.039	0.031	0	0.109	0.053	0.049	0.162	0.025	0.074	0.003	0.029	0.026	0.11	0.104	0.047	0.143	0.188	0.013	0.095
OTU527	-0.824	6.091	0.469479	0.777867	NotSig	Bacteria	Bacteroidetes	Bacteroidia	Bacteroidales	Prevotellaceae	Prevotella	0.002	0.003	0.005	0.005	0.007	0	0	0	0	0	0	0	0.005	0.017	0.003	0.005	0	0	0	0.002	0	0
OTU1730	0.516	6.954	0.473136	0.783184	NotSig	Bacteria	Firmicutes	Clostridia	Clostridiales	Unassigned	Unassigned	0.009	0.006	0.019	0.005	0.009	0.019	0.004	0.005	0.011	0.018	0.002	0.002	0.003	0.009	0.003	0.005	0	0.007	0.002	0.004	0.011	0.018
OTU214	-0.799	5.726	0.474317	0.784395	NotSig	Bacteria	Unassigned	Unassigned	Unassigned	Unassigned	Unassigned	0	0.001	0	0	0.002	0	0	0	0	0	0	0.002	0.003	0.006	0	0.003	0	0	0	0	0	0
OTU1648	-0.734	6.228	0.475253	0.785201	NotSig	Bacteria	Firmicutes	Clostridia	Clostridiales	Lachnospiraceae	Unassigned	0.002	0.004	0.002	0	0	0.002	0.005	0.01	0	0.002	0	0	0.008	0.003	0.005	0	0.011	0	0	0	0	0.011
OTU182	-0.785	6.424	0.476614	0.786498	NotSig	Bacteria	Unassigned	Unassigned	Unassigned	Unassigned	Unassigned	0.003	0.005	0	0.002	0	0	0	0	0.004	0.002	0.015	0.006	0	0.02	0	0.008	0	0	0.002	0.014	0.004	0
OTU1629	-0.885	6.586	0.476938	0.786498	NotSig	Bacteria	Firmicutes	Clostridia	Clostridiales	Lachnospiraceae	Unassigned	0.003	0.006	0	0	0	0	0	0.01	0.002	0	0	0.022	0	0	0.003	0	0.011	0	0.028	0.002	0.002	0.014
OTU423	0.894	5.662	0.478242	0.787905	NotSig	Bacteria	Bacteroidetes	Bacteroidia	Bacteroidales	Prevotellaceae	Prevotella	0.001	0	0	0	0	0	0	0	0	0	0.007	0	0	0.003	0	0	0	0	0	0	0	0
OTU1604	-0.883	6.314	0.479695	0.788351	NotSig	Bacteria	Firmicutes	Clostridia	Clostridiales	Clostridiaceae_1	Clostridium_sensu_stricto	0.002	0.004	0	0	0	0	0	0	0.004	0.016	0	0.004	0.003	0.003	0	0.003	0	0	0.012	0	0	0.023
OTU1517	-0.611	8.415	0.479761	0.788351	NotSig	Bacteria	Firmicutes	Clostridia	Clostridiales	Lachnospiraceae	Unassigned	0.023	0.033	0.002	0.002	0.007	0.005	0.005	0.028	0.032	0.004	0.012	0.129	0.011	0.003	0.008	0.005	0.074	0.005	0.096	0.01	0.049	0.066
OTU923	0.543	10.462	0.479981	0.788351	NotSig	Bacteria	Firmicutes	Clostridia	Clostridiales	Lachnospiraceae	Unassigned	0.179	0.112	0.524	0.14	0.171	0.016	0.056	0.005	0.053	0.708	0.064	0.056	0.472	0.069	0.021	0.068	0.068	0.054	0.012	0.091	0.053	0.206
OTU782	0.68	6.127	0.480317	0.788351	NotSig	Bacteria	Firmicutes	Clostridia	Clostridiales	Unassigned	Unassigned	0.003	0.002	0	0.005	0.004	0.012	0.002	0.003	0	0.002	0	0.002	0.005	0.009	0	0	0	0	0	0.002	0.002	0
OTU1121	0.575	6.314	0.480961	0.788667	NotSig	Bacteria	Firmicutes	Clostridia	Clostridiales	Clostridiales_Incertae_Sedis_XIII	Mogibacterium	0.004	0.003	0.002	0.002	0.002	0	0.009	0.01	0.006	0.008	0.002	0	0.005	0	0.003	0	0	0.009	0.002	0.002	0.004	0
OTU411	0.596	9.256	0.481654	0.788693	NotSig	Bacteria	Bacteroidetes	Bacteroidia	Bacteroidales	Unassigned	Unassigned	0.07	0.051	0.112	0.097	0.254	0.021	0.007	0.013	0.002	0.132	0.052	0.012	0.06	0.334	0.042	0.005	0.014	0.025	0.014	0.01	0.007	0.002
OTU531	-1.066	5.84	0.481879	0.788693	NotSig	Bacteria	Bacteroidetes	Bacteroidia	Bacteroidales	Prevotellaceae	Prevotella	0.001	0.002	0.002	0	0	0	0	0.003	0	0	0	0.002	0	0	0	0	0	0.018	0	0	0	0
OTU1377	0.876	5.649	0.483114	0.78984	NotSig	Bacteria	Firmicutes	Clostridia	Clostridiales	Unassigned	Unassigned	0.001	0	0	0	0	0	0	0.005	0	0.002	0	0	0	0	0	0	0	0.002	0	0	0	0
OTU1569	0.734	5.742	0.483483	0.78984	NotSig	Bacteria	Firmicutes	Clostridia	Clostridiales	Ruminococcaceae	Clostridium_IV	0.001	0.001	0	0.002	0	0	0.004	0.003	0	0	0	0.002	0.003	0	0	0	0.003	0	0	0	0	0
OTU552	-0.898	5.726	0.484399	0.790597	NotSig	Bacteria	Bacteroidetes	Bacteroidia	Bacteroidales	Prevotellaceae	Prevotella	0	0.001	0.002	0.002	0	0	0	0	0	0	0	0	0.008	0	0	0	0	0	0	0	0.002	0
OTU1543	-1.116	5.949	0.485286	0.791306	NotSig	Bacteria	Firmicutes	Clostridia	Clostridiales	Ruminococcaceae	Unassigned	0.001	0.002	0	0	0	0	0.009	0	0	0	0	0	0	0.009	0	0	0	0.005	0	0	0	0.011
OTU906	0.763	6.001	0.487047	0.793437	NotSig	Bacteria	Firmicutes	Clostridia	Clostridiales	Unassigned	Unassigned	0.002	0.001	0.002	0	0	0	0	0.003	0.004	0.006	0.01	0	0.003	0	0	0.005	0	0	0	0	0.004	0
OTU871	0.871	5.668	0.48819	0.794559	NotSig	Bacteria	Firmicutes	Clostridia	Clostridiales	Ruminococcaceae	Unassigned	0.001	0	0	0	0.007	0	0	0	0	0	0	0	0	0	0	0	0	0	0	0	0.002	0
OTU33	-0.56	12.924	0.489463	0.79589	NotSig	Bacteria	Bacteroidetes	Bacteroidia	Bacteroidales	Prevotellaceae	Prevotella	0.648	0.909	0.861	1.525	1.759	0.073	0.547	0.096	0.154	0.692	0.129	0.64	1.048	3	0.678	0.745	0.038	0.14	0.002	0.631	2.692	0.12
OTU1340	0.856	5.646	0.490499	0.796122	NotSig	Bacteria	Firmicutes	Clostridia	Clostridiales	Unassigned	Unassigned	0.001	0	0.005	0	0.002	0	0	0	0	0	0	0	0	0	0	0	0	0.002	0	0	0	0
OTU1234	0.858	5.647	0.490664	0.796122	NotSig	Bacteria	Firmicutes	Clostridia	Clostridiales	Ruminococcaceae	Unassigned	0.001	0	0.002	0	0	0.002	0	0	0	0.002	0	0	0	0	0	0	0	0.002	0	0	0	0
OTU1082	0.712	5.738	0.49149	0.796122	NotSig	Bacteria	Firmicutes	Clostridia	Clostridiales	Ruminococcaceae	Unassigned	0.001	0	0.002	0.002	0	0	0	0	0.002	0.004	0	0	0.003	0	0	0	0	0	0	0	0.002	0
OTU1375	-0.573	9.615	0.492079	0.796122	NotSig	Bacteria	Firmicutes	Clostridia	Clostridiales	Lachnospiraceae	Lachnospiracea_incertae_sedis	0.063	0.093	0.103	0.085	0.076	0.012	0.036	0.251	0.026	0	0.015	0.022	0.041	0.04	0.026	0.003	0.06	0.534	0.058	0.006	0.024	0.138
OTU360	-0.771	5.781	0.492155	0.796122	NotSig	Bacteria	Actinobacteria	Actinobacteria	Actinomycetales	Actinomycetaceae	Actinomyces	0.001	0.001	0.002	0	0	0	0	0	0.002	0.002	0	0	0	0	0	0	0	0.002	0	0	0.007	0.002
OTU889	-0.863	6.195	0.492339	0.796122	NotSig	Bacteria	Firmicutes	Clostridia	Clostridiales	Unassigned	Unassigned	0.002	0.003	0	0.002	0	0	0.002	0	0.004	0	0	0.01	0	0	0.003	0.003	0	0.002	0	0	0.024	0
OTU433	-0.545	8.088	0.493382	0.796151	NotSig	Bacteria	Bacteroidetes	Unassigned	Unassigned	Unassigned	Unassigned	0.018	0.027	0.007	0.012	0.007	0.044	0.014	0.003	0.039	0.022	0.005	0.022	0.123	0.046	0.003	0.021	0	0.011	0.007	0.016	0.038	0.009
OTU734	1.064	5.998	0.494109	0.796151	NotSig	Bacteria	Verrucomicrobia	Verrucomicrobiae	Verrucomicrobiales	Verrucomicrobiaceae	Akkermansia	0.003	0.001	0.031	0	0	0	0	0	0	0	0	0	0	0	0	0.003	0.003	0	0.002	0.002	0	0
OTU760	-0.741	6.414	0.49494	0.796151	NotSig	Bacteria	Tenericutes	Mollicutes	Anaeroplasmatales	Anaeroplasmataceae	Anaeroplasma	0.003	0.005	0	0.005	0	0.007	0	0	0.011	0.002	0	0.002	0.005	0.026	0	0.008	0	0	0	0.004	0.009	0
OTU875	-0.655	6.219	0.495502	0.796151	NotSig	Bacteria	Firmicutes	Clostridia	Clostridiales	Unassigned	Unassigned	0.002	0.004	0.002	0.002	0.007	0	0	0	0	0.004	0.005	0.002	0.014	0	0	0.008	0	0.011	0	0.002	0.002	0
OTU343	-0.752	5.726	0.495546	0.796151	NotSig	Bacteria	Unassigned	Unassigned	Unassigned	Unassigned	Unassigned	0	0.001	0	0	0	0.002	0	0	0.002	0	0	0	0	0.003	0.003	0	0	0	0	0	0	0.005
OTU237	0.851	5.661	0.495762	0.796151	NotSig	Bacteria	Unassigned	Unassigned	Unassigned	Unassigned	Unassigned	0.001	0	0.002	0	0	0.002	0	0.003	0	0	0	0	0.003	0	0	0	0	0	0	0	0	0
OTU644	0.551	6.978	0.495977	0.796151	NotSig	Bacteria	Bacteroidetes	Unassigned	Unassigned	Unassigned	Unassigned	0.011	0.006	0.065	0.01	0.002	0	0.007	0.01	0.004	0	0.01	0.002	0	0.009	0.008	0.003	0.008	0.007	0.007	0.006	0.004	0.011
OTU90	0.848	5.658	0.496181	0.796151	NotSig	Bacteria	Spirochaetes	Spirochaetia	Spirochaetales	Spirochaetaceae	Treponema	0.001	0	0.002	0	0.004	0	0	0	0	0	0	0	0	0	0	0.003	0	0	0	0	0	0
OTU456	-0.865	6.763	0.496456	0.796151	NotSig	Bacteria	Bacteroidetes	Unassigned	Unassigned	Unassigned	Unassigned	0.004	0.009	0	0	0.002	0	0	0	0.011	0	0.027	0.002	0	0.063	0	0.016	0	0.005	0	0.002	0.007	0
OTU1229	0.489	8.298	0.497179	0.79658	NotSig	Bacteria	Firmicutes	Clostridia	Clostridiales	Ruminococcaceae	Unassigned	0.032	0.022	0.014	0.022	0.007	0.007	0.022	0.013	0.064	0.085	0.04	0.046	0.033	0.043	0.008	0.005	0.022	0.016	0.068	0.006	0.009	0.009
OTU332	-1.082	5.938	0.498819	0.798476	NotSig	Bacteria	Firmicutes	Erysipelotrichia	Erysipelotrichales	Erysipelotrichaceae	Unassigned	0.001	0.002	0	0	0	0	0	0	0	0.002	0.007	0	0	0	0	0	0	0.011	0	0	0	0.011
OTU834	0.532	8.402	0.500017	0.799661	NotSig	Bacteria	Firmicutes	Clostridia	Clostridiales	Unassigned	Unassigned	0.033	0.023	0.022	0.005	0.052	0.119	0.007	0.003	0.019	0.081	0.01	0.016	0.101	0.012	0.005	0.024	0.003	0.014	0.014	0.022	0.029	0.011
OTU1097	0.479	9.452	0.501662	0.800273	NotSig	Bacteria	Unassigned	Unassigned	Unassigned	Unassigned	Unassigned	0.079	0.05	0.043	0.136	0.137	0.033	0.018	0.043	0.056	0.242	0.072	0.012	0.008	0.032	0.008	0.099	0.077	0.038	0.037	0.075	0.111	0.016
OTU1481	0.558	6.602	0.501922	0.800273	NotSig	Bacteria	Firmicutes	Clostridia	Clostridiales	Lachnospiraceae	Unassigned	0.006	0.004	0.007	0.005	0.007	0	0.007	0.005	0.006	0.01	0	0.016	0.003	0	0.008	0.003	0	0	0	0.008	0.011	0.005
OTU1143	-0.654	6.041	0.502217	0.800273	NotSig	Bacteria	Firmicutes	Clostridia	Clostridiales	Ruminococcaceae	Oscillibacter	0.002	0.003	0.005	0	0.002	0.002	0.002	0	0	0.002	0.002	0	0.005	0	0.008	0	0.011	0	0	0	0	0.002
OTU1147	0.793	6.13	0.502641	0.800273	NotSig	Bacteria	Unassigned	Unassigned	Unassigned	Unassigned	Unassigned	0.003	0.002	0.002	0	0	0.009	0	0.01	0	0	0.01	0	0	0	0.003	0	0.003	0.007	0.005	0	0	0
OTU1093	-0.485	9.709	0.502724	0.800273	NotSig	Bacteria	Firmicutes	Clostridia	Clostridiales	Ruminococcaceae	Oscillibacter	0.071	0.088	0.294	0.075	0.108	0.037	0.009	0.038	0.039	0.028	0.057	0.024	0.005	0.026	0.14	0.123	0.197	0.047	0.122	0.109	0.009	0.107
OTU169	0.895	6.16	0.5036	0.800273	NotSig	Bacteria	Unassigned	Unassigned	Unassigned	Unassigned	Unassigned	0.003	0.002	0.002	0	0.002	0.002	0	0	0	0	0	0.026	0	0	0	0	0	0.002	0	0.004	0	0.009
OTU1420	0.7	7.262	0.504213	0.800273	NotSig	Bacteria	Firmicutes	Clostridia	Clostridiales	Lachnospiraceae	Unassigned	0.013	0.01	0	0.002	0.004	0.035	0.002	0.023	0.013	0.026	0.002	0.022	0.003	0.084	0.005	0	0	0	0	0	0.002	0.002
OTU414	-0.512	10.121	0.504789	0.800273	NotSig	Bacteria	Bacteroidetes	Bacteroidia	Bacteroidales	Prevotellaceae	Prevotella	0.09	0.119	0.067	0.249	0.031	0.117	0.018	0.033	0.09	0.085	0.05	0.159	0.123	0.156	0.219	0.01	0.077	0.016	0.012	0.012	0.546	0.02
OTU1099	-0.748	6.264	0.504981	0.800273	NotSig	Bacteria	Firmicutes	Clostridia	Clostridiales	Eubacteriaceae	Pseudoramibacter	0.002	0.004	0.002	0	0.004	0	0.002	0	0	0	0.012	0.002	0.008	0	0.016	0	0	0.014	0	0.004	0	0
OTU1144	-0.745	6.213	0.505427	0.800273	NotSig	Bacteria	Firmicutes	Clostridia	Clostridiales	Unassigned	Unassigned	0.002	0.003	0.002	0.002	0	0.002	0.005	0	0	0	0	0.008	0.003	0	0	0.013	0	0	0	0.006	0.011	0
OTU377	-0.541	10.227	0.505436	0.800273	NotSig	Bacteria	Bacteroidetes	Bacteroidia	Bacteroidales	Prevotellaceae	Unassigned	0.093	0.154	0.041	0.056	0.052	0.239	0.034	0.32	0.023	0.006	0.079	0.078	0.063	0.585	0.654	0.013	0.06	0.061	0.016	0.01	0.064	0.009
OTU1380	-0.512	9.427	0.506163	0.800699	NotSig	Bacteria	Firmicutes	Clostridia	Clostridiales	Lachnospiraceae	Unassigned	0.055	0.075	0.01	0.075	0.009	0.028	0.075	0.16	0.004	0.016	0.169	0.008	0.15	0.006	0.082	0.018	0.186	0.038	0.108	0.02	0.029	0.109
OTU1020	-0.878	5.745	0.507194	0.801605	NotSig	Bacteria	Firmicutes	Clostridia	Clostridiales	Ruminococcaceae	Unassigned	0	0.001	0	0	0	0.002	0	0	0	0	0	0.002	0	0	0	0	0.003	0	0.007	0	0	0
OTU722	-0.483	12.403	0.50999	0.804676	NotSig	Bacteria	Firmicutes	Clostridia	Clostridiales	Ruminococcaceae	Unassigned	0.456	0.579	0.108	0.123	0.213	0.183	2.594	0.375	0.101	0.217	0.221	0.424	0.284	0.236	0.393	0.688	0.684	0.789	0.246	0.651	1.776	0.043
OTU1281	0.662	7.198	0.51105	0.804676	NotSig	Bacteria	Firmicutes	Clostridia	Clostridiales	Unassigned	Unassigned	0.012	0.007	0	0.002	0	0.019	0.065	0.013	0.004	0.006	0.007	0.008	0	0.014	0.003	0.003	0	0.005	0	0.006	0.04	0
OTU1219	0.812	5.661	0.511133	0.804676	NotSig	Bacteria	Firmicutes	Clostridia	Clostridiales	Ruminococcaceae	Oscillibacter	0.001	0	0	0.002	0	0.002	0	0	0	0	0	0.002	0	0	0	0	0	0	0	0	0.002	0
OTU1457	0.501	6.662	0.51134	0.804676	NotSig	Bacteria	Firmicutes	Clostridia	Clostridiales	Lachnospiraceae	Unassigned	0.007	0.004	0.007	0.01	0.004	0	0.002	0	0.008	0.006	0.027	0.004	0.003	0.009	0.003	0.005	0.003	0.002	0.007	0.006	0	0.007
OTU902	-0.715	5.855	0.51172	0.804676	NotSig	Bacteria	Firmicutes	Clostridia	Clostridiales	Ruminococcaceae	Unassigned	0.001	0.001	0.002	0	0	0	0	0	0.002	0	0	0.004	0.003	0	0	0.003	0	0	0.005	0	0.004	0
OTU210	0.805	5.65	0.511899	0.804676	NotSig	Bacteria	Unassigned	Unassigned	Unassigned	Unassigned	Unassigned	0.001	0	0	0	0	0	0	0	0.002	0	0	0.004	0	0	0	0	0	0	0	0	0	0.002
OTU1014	-0.677	6.1	0.513486	0.806042	NotSig	Bacteria	Firmicutes	Clostridia	Clostridiales	Unassigned	Unassigned	0.002	0.002	0.002	0.002	0.002	0	0.004	0	0.004	0	0.002	0	0	0.006	0	0.003	0	0	0	0.014	0	0.002
OTU1136	0.576	6.617	0.513691	0.806042	NotSig	Bacteria	Firmicutes	Clostridia	Clostridiales	Ruminococcaceae	Unassigned	0.006	0.004	0.01	0.005	0	0	0	0.003	0.017	0.002	0.02	0.008	0	0.006	0	0.008	0.005	0	0.007	0.006	0.002	0.005
OTU1620	-0.627	7.217	0.515661	0.808409	NotSig	Bacteria	Firmicutes	Clostridia	Clostridiales	Clostridiaceae_1	Clostridium_sensu_stricto	0.008	0.012	0.005	0.002	0	0.002	0.002	0	0.028	0.026	0	0.014	0.014	0.009	0	0	0.011	0.007	0.021	0	0.02	0.039
OTU432	-0.735	7.386	0.517746	0.810951	NotSig	Bacteria	Bacteroidetes	Bacteroidia	Bacteroidales	Porphyromonadaceae	Unassigned	0.009	0.016	0	0.007	0.004	0	0.036	0.005	0	0.004	0.035	0.002	0.066	0	0	0	0.005	0.081	0.007	0.004	0	0
OTU1098	-0.847	8.851	0.519082	0.811676	NotSig	Bacteria	Firmicutes	Clostridia	Clostridiales	Unassigned	Unassigned	0.03	0.045	0	0.007	0	0	0.054	0.003	0.069	0.112	0	0.054	0	0.017	0	0.152	0	0	0	0.237	0	0.043
OTU894	0.812	6.33	0.519478	0.811676	NotSig	Bacteria	Firmicutes	Clostridia	Clostridiales	Unassigned	Unassigned	0.005	0.003	0	0.034	0.004	0	0	0	0.002	0	0	0.008	0.003	0.009	0.013	0	0	0	0	0.002	0	0
OTU331	0.808	7.265	0.519936	0.811676	NotSig	Bacteria	Unassigned	Unassigned	Unassigned	Unassigned	Unassigned	0.014	0.007	0	0.034	0	0	0	0.041	0.006	0.008	0.007	0.048	0	0	0.003	0	0	0.002	0	0.002	0	0.068
OTU1159	-0.531	6.003	0.520067	0.811676	NotSig	Bacteria	Unassigned	Unassigned	Unassigned	Unassigned	Unassigned	0.002	0.002	0.002	0.002	0.002	0	0	0	0	0.004	0	0.004	0.003	0.003	0	0.003	0	0.002	0.005	0.002	0	0.005
OTU1378	0.475	9.73	0.523956	0.817016	NotSig	Bacteria	Firmicutes	Clostridia	Clostridiales	Ruminococcaceae	Unassigned	0.096	0.065	0.019	0.027	0.007	0.129	0.195	0.058	0.021	0.227	0.253	0.022	0.049	0.009	0.032	0.031	0.128	0.183	0.124	0.049	0.022	0.025
OTU1279	0.434	7.199	0.524586	0.817155	NotSig	Bacteria	Firmicutes	Clostridia	Clostridiales	Lachnospiraceae	Unassigned	0.012	0.008	0.014	0.034	0.009	0.005	0.007	0	0.009	0.016	0.025	0.004	0.011	0.012	0.003	0.01	0.011	0.009	0.014	0.002	0.009	0.005
OTU201	-0.698	5.733	0.52498	0.817155	NotSig	Bacteria	Deferribacteres	Deferribacteres	Deferribacterales	Deferribacteraceae	Mucispirillum	0	0.001	0	0	0	0.005	0	0	0	0	0	0	0	0	0.003	0	0	0.002	0	0	0.002	0.002
OTU768	0.534	6.317	0.525691	0.817486	NotSig	Bacteria	Actinobacteria	Actinobacteria	Actinomycetales	Corynebacteriaceae	Corynebacterium	0.004	0.003	0.005	0.002	0.013	0.002	0.009	0.003	0	0.002	0	0.004	0.005	0	0	0.008	0	0.002	0.002	0.002	0	0.007
OTU1545	-0.896	5.779	0.526128	0.817486	NotSig	Bacteria	Firmicutes	Clostridia	Clostridiales	Ruminococcaceae	Unassigned	0.001	0.001	0	0	0	0	0.005	0	0	0	0	0	0	0.003	0	0.003	0	0	0	0	0.007	0
OTU1655	0.776	6.341	0.529486	0.820252	NotSig	Bacteria	Firmicutes	Clostridia	Clostridiales	Clostridiaceae_1	Clostridium_sensu_stricto	0.004	0.002	0.005	0.005	0	0	0	0.003	0.021	0.01	0	0.002	0	0	0	0	0	0	0	0	0.011	0.011
OTU392	0.523	11.409	0.530079	0.820252	NotSig	Bacteria	Bacteroidetes	Bacteroidia	Bacteroidales	Prevotellaceae	Prevotella	0.317	0.22	0.665	0.327	1.406	0	0.215	0.18	0.169	0.043	0.069	0.095	0.205	0.326	0.375	0.685	0.049	0.104	0.005	0.315	0.133	0.009
OTU76	-0.468	8.825	0.530352	0.820252	NotSig	Bacteria	Spirochaetes	Spirochaetia	Spirochaetales	Spirochaetaceae	Treponema	0.034	0.049	0.026	0.036	0.067	0.026	0.013	0.02	0.028	0.014	0.072	0.038	0.112	0.17	0.042	0.034	0.003	0.011	0	0.055	0.044	0.016
OTU1723	0.762	5.658	0.531134	0.820252	NotSig	Bacteria	Firmicutes	Clostridia	Clostridiales	Ruminococcaceae	Unassigned	0.001	0	0	0	0	0	0	0.005	0	0.002	0	0	0	0	0	0	0	0	0.002	0	0	0
OTU819	0.487	7.873	0.532404	0.820252	NotSig	Bacteria	Unassigned	Unassigned	Unassigned	Unassigned	Unassigned	0.023	0.014	0.012	0	0.004	0.009	0.05	0.025	0.015	0.075	0.032	0.006	0.011	0.012	0.003	0.018	0.005	0.011	0.005	0.012	0.06	0.007
OTU1363	0.757	5.657	0.532454	0.820252	NotSig	Bacteria	Firmicutes	Clostridia	Clostridiales	Clostridiales_Incertae_Sedis_XIII	Unassigned	0.001	0	0	0	0	0	0	0	0.006	0	0	0	0	0	0	0	0	0	0.002	0	0	0
OTU675	0.809	6.387	0.533062	0.820252	NotSig	Bacteria	Bacteroidetes	Bacteroidia	Bacteroidales	Porphyromonadaceae	Unassigned	0.005	0.003	0	0.002	0.002	0	0	0.003	0.026	0	0.012	0	0.003	0	0	0	0	0.02	0.005	0	0	0
OTU537	-0.833	5.837	0.533246	0.820252	NotSig	Bacteria	Bacteroidetes	Bacteroidia	Bacteroidales	Prevotellaceae	Prevotella	0.001	0.001	0	0	0	0	0	0	0	0.008	0	0	0.005	0	0.003	0	0.003	0	0	0.004	0	0
OTU1523	-0.894	5.911	0.533315	0.820252	NotSig	Bacteria	Unassigned	Unassigned	Unassigned	Unassigned	Unassigned	0.001	0.002	0.002	0	0.007	0	0	0	0	0	0	0	0	0.017	0	0.003	0	0	0	0.002	0	0
OTU628	0.677	8.787	0.533543	0.820252	NotSig	Bacteria	Bacteroidetes	Unassigned	Unassigned	Unassigned	Unassigned	0.05	0.034	0	0.194	0.007	0	0.014	0	0.062	0.004	0.002	0.215	0	0.124	0.156	0.018	0.016	0.009	0.002	0.012	0.002	0
OTU743	-0.472	10.547	0.533601	0.820252	NotSig	Bacteria	Firmicutes	Clostridia	Clostridiales	Clostridiaceae_1	Clostridium_sensu_stricto	0.125	0.152	0.098	0.075	0.083	0.061	0.013	0.036	0.203	0.471	0.047	0.161	0.093	0.043	0.018	0.037	0.153	0.063	0.758	0.032	0.066	0.259
OTU122	-0.533	9.418	0.533817	0.820252	NotSig	Bacteria	Unassigned	Unassigned	Unassigned	Unassigned	Unassigned	0.053	0.076	0.012	0.053	0.022	0.007	0	0.117	0.021	0.01	0.03	0.253	0.011	0.084	0.021	0.05	0.003	0.216	0.021	0.053	0.011	0.293
OTU136	0.671	8.14	0.534009	0.820252	NotSig	Bacteria	Unassigned	Unassigned	Unassigned	Unassigned	Unassigned	0.029	0.017	0.002	0.056	0.002	0.047	0	0	0.008	0.002	0.01	0.159	0	0.006	0	0.008	0	0.009	0.014	0.016	0.002	0.116
OTU1101	-0.424	9.462	0.534963	0.82035	NotSig	Bacteria	Firmicutes	Clostridia	Clostridiales	Ruminococcaceae	Oscillibacter	0.058	0.077	0.074	0.027	0.061	0.03	0.045	0.028	0.058	0.14	0.032	0.082	0.022	0.233	0.156	0.102	0.063	0.005	0.014	0.099	0.038	0.041
OTU1602	0.75	5.654	0.535064	0.82035	NotSig	Bacteria	Firmicutes	Clostridia	Clostridiales	Ruminococcaceae	Clostridium_IV	0.001	0	0	0.002	0	0	0	0	0	0	0	0.004	0	0	0	0	0.003	0	0	0	0	0
OTU1527	0.55	6.391	0.535677	0.82035	NotSig	Bacteria	Firmicutes	Clostridia	Clostridiales	Lachnospiraceae	Unassigned	0.005	0.003	0.002	0.017	0	0.002	0	0	0.004	0.006	0.017	0	0.003	0.009	0.003	0	0.008	0.002	0.002	0.002	0.002	0
OTU946	0.797	5.829	0.536561	0.82035	NotSig	Bacteria	Unassigned	Unassigned	Unassigned	Unassigned	Unassigned	0.001	0.001	0	0	0	0	0.009	0	0	0.004	0	0.002	0.003	0.006	0	0	0	0	0	0	0	0
OTU727	0.996	6.835	0.536665	0.82035	NotSig	Bacteria	Firmicutes	Clostridia	Clostridiales	Unassigned	Unassigned	0.01	0.005	0	0	0	0	0	0.028	0	0.02	0.05	0	0	0	0.034	0	0	0	0	0	0	0.014
OTU773	0.743	5.643	0.536888	0.82035	NotSig	Bacteria	Actinobacteria	Actinobacteria	Actinomycetales	Micrococcaceae	Unassigned	0.001	0	0.002	0	0	0	0.002	0	0	0	0	0.002	0	0	0.003	0	0	0	0	0	0	0
OTU1237	-0.891	5.713	0.538193	0.821106	NotSig	Bacteria	Firmicutes	Clostridia	Clostridiales	Eubacteriaceae	Eubacterium	0	0.001	0.002	0	0	0	0.002	0	0	0	0	0	0	0.012	0	0	0	0	0	0	0	0
OTU1509	-0.68	6.423	0.538451	0.821106	NotSig	Bacteria	Firmicutes	Clostridia	Clostridiales	Ruminococcaceae	Faecalibacterium	0.003	0.006	0	0.002	0.002	0	0.013	0	0.006	0	0.002	0.004	0	0.026	0.021	0	0.003	0	0	0	0	0.007
OTU1597	0.784	8.284	0.539153	0.821106	NotSig	Bacteria	Firmicutes	Clostridia	Clostridiales	Lachnospiraceae	Unassigned	0.034	0.023	0.007	0.007	0	0	0.172	0	0.041	0.041	0	0.07	0	0.179	0.021	0	0	0.014	0	0	0	0.016
OTU692	0.738	5.647	0.539262	0.821106	NotSig	Bacteria	Bacteroidetes	Bacteroidia	Bacteroidales	Porphyromonadaceae	Unassigned	0.001	0	0	0.002	0	0	0	0	0	0.002	0	0.002	0.003	0	0	0	0	0	0	0	0	0
OTU443	0.545	9.006	0.54072	0.821903	NotSig	Bacteria	Bacteroidetes	Bacteroidia	Bacteroidales	Porphyromonadaceae	Unassigned	0.063	0.041	0.033	0.412	0.009	0.002	0.027	0.028	0.021	0.093	0	0.002	0.035	0.118	0.037	0.003	0.128	0.047	0.019	0.002	0.011	0.007
OTU900	0.944	6.167	0.540968	0.821903	NotSig	Bacteria	Firmicutes	Clostridia	Clostridiales	Ruminococcaceae	Unassigned	0.004	0.002	0	0	0	0	0.03	0	0	0	0.005	0	0.005	0	0	0	0	0.007	0.005	0	0	0
OTU325	0.722	6.872	0.541196	0.821903	NotSig	Bacteria	Firmicutes	Negativicutes	Selenomonadales	Veillonellaceae	Unassigned	0.01	0.005	0.01	0.063	0	0	0.005	0	0.002	0.004	0.012	0.004	0.022	0	0.005	0	0	0	0	0	0	0.027
OTU744	0.426	11.854	0.542009	0.822423	NotSig	Bacteria	Firmicutes	Clostridia	Clostridiales	Clostridiaceae_1	Clostridium_sensu_stricto	0.434	0.301	0.187	0.16	0.211	0.4	0.036	0.54	0.361	1.77	0.367	0.308	0.191	0.156	0.124	0.094	0.12	0.489	0.536	0.107	0.161	1.036
OTU1125	0.46	6.503	0.543348	0.82374	NotSig	Bacteria	Firmicutes	Clostridia	Clostridiales	Ruminococcaceae	Unassigned	0.005	0.004	0.01	0.01	0.004	0.007	0.005	0.003	0.006	0	0.007	0.002	0.011	0.012	0.003	0.008	0	0	0	0.002	0.002	0.002
OTU928	0.542	6.107	0.545116	0.823993	NotSig	Bacteria	Firmicutes	Clostridia	Clostridiales	Christensenellaceae	Christensenella	0.003	0.002	0.002	0.002	0.004	0.009	0	0	0.002	0.002	0.002	0.002	0	0.006	0	0.003	0	0	0.005	0	0.004	0
OTU447	-0.729	6.599	0.545865	0.823993	NotSig	Bacteria	Bacteroidetes	Bacteroidia	Bacteroidales	Porphyromonadaceae	Unassigned	0.004	0.007	0.005	0	0	0	0.027	0	0	0	0.007	0	0.003	0.014	0.008	0.003	0.008	0.036	0	0	0	0
OTU1217	-0.729	5.623	0.546098	0.823993	NotSig	Bacteria	Firmicutes	Clostridia	Clostridiales	Unassigned	Unassigned	0	0	0	0	0	0	0	0	0	0.002	0	0	0	0.003	0	0	0	0	0	0.002	0	0
OTU1614	-0.729	5.623	0.546098	0.823993	NotSig	Bacteria	Proteobacteria	Alphaproteobacteria	Rhizobiales	Unassigned	Unassigned	0	0	0	0	0	0	0	0	0	0.002	0	0	0	0.003	0	0	0	0	0	0.002	0	0
OTU96	-1.055	6.391	0.546262	0.823993	NotSig	Bacteria	Unassigned	Unassigned	Unassigned	Unassigned	Unassigned	0.003	0.005	0	0	0	0	0	0.025	0	0	0	0	0	0	0	0	0.003	0.014	0	0	0	0.036
OTU1703	0.692	5.912	0.546343	0.823993	NotSig	Bacteria	Firmicutes	Clostridia	Clostridiales	Unassigned	Unassigned	0.002	0.001	0	0	0	0	0.004	0	0.009	0.002	0	0.002	0.003	0	0	0	0	0	0.005	0	0	0.002
OTU1271	-0.62	7.447	0.547701	0.825328	NotSig	Bacteria	Firmicutes	Clostridia	Clostridiales	Unassigned	Unassigned	0.011	0.016	0	0.007	0	0	0.011	0.018	0.009	0.026	0.035	0	0.052	0.003	0.058	0	0.011	0.002	0.028	0.006	0	0
OTU451	0.541	7.566	0.548475	0.825783	NotSig	Bacteria	Bacteroidetes	Bacteroidia	Bacteroidales	Porphyromonadaceae	Unassigned	0.016	0.012	0.005	0.027	0.09	0.009	0.005	0.003	0.008	0.006	0	0.012	0.035	0.023	0.016	0.026	0	0.005	0	0.01	0.007	0
OTU1551	0.716	5.65	0.549918	0.826409	NotSig	Bacteria	Firmicutes	Clostridia	Clostridiales	Ruminococcaceae	Unassigned	0.001	0	0	0	0.002	0	0.004	0	0	0	0	0	0	0	0	0	0	0	0	0	0.002	0
OTU1200	-0.717	5.622	0.550524	0.826409	NotSig	Bacteria	Firmicutes	Clostridia	Clostridiales	Lachnospiraceae	Unassigned	0	0.001	0	0	0	0	0.002	0	0	0	0	0	0.005	0	0	0	0	0	0	0	0	0
OTU1497	-0.717	5.622	0.550524	0.826409	NotSig	Bacteria	Firmicutes	Clostridia	Clostridiales	Lachnospiraceae	Unassigned	0	0.001	0	0	0	0	0.002	0	0	0	0	0	0.005	0	0	0	0	0	0	0	0	0
OTU1718	0.708	5.642	0.551416	0.826409	NotSig	Bacteria	Actinobacteria	Actinobacteria	Coriobacteriales	Coriobacteriaceae	Unassigned	0.001	0	0	0	0	0	0.002	0	0	0.002	0	0.002	0	0	0	0.003	0	0	0	0	0	0
OTU796	0.435	11.664	0.55147	0.826409	NotSig	Bacteria	Firmicutes	Clostridia	Clostridiales	Ruminococcaceae	Unassigned	0.396	0.276	0.189	1.767	0.117	0.26	0.032	0.01	0.06	0.499	0.696	0.326	0.131	1.026	0.1	0.267	0.189	0.214	0.159	0.325	0.146	0.204
OTU1421	0.511	7.351	0.551727	0.826409	NotSig	Bacteria	Firmicutes	Clostridia	Clostridiales	Ruminococcaceae	Unassigned	0.015	0.01	0.005	0.029	0.007	0	0.016	0.071	0.004	0.002	0.01	0.004	0.008	0.006	0.026	0	0.008	0.038	0.002	0	0.004	0.009
OTU1557	0.705	5.639	0.552224	0.82642	NotSig	Bacteria	Firmicutes	Clostridia	Clostridiales	Ruminococcaceae	Unassigned	0.001	0	0.002	0	0	0	0.004	0	0	0	0	0	0	0	0.003	0	0	0	0	0	0	0
OTU266	-0.748	5.728	0.55268	0.82642	NotSig	Bacteria	Deferribacteres	Deferribacteres	Deferribacterales	Deferribacteraceae	Mucispirillum	0.001	0.001	0	0	0	0	0	0.003	0	0	0.002	0	0	0.009	0	0.003	0	0	0	0	0	0
OTU1641	-0.691	6.784	0.553403	0.826794	NotSig	Bacteria	Firmicutes	Clostridia	Clostridiales	Lachnospiraceae	Unassigned	0.005	0.008	0.002	0	0	0	0.004	0.003	0	0.037	0.005	0.002	0.003	0.009	0	0	0.03	0.002	0.033	0	0	0
OTU260	0.653	9.223	0.554596	0.827868	NotSig	Bacteria	Firmicutes	Negativicutes	Selenomonadales	Veillonellaceae	Megasphaera	0.067	0.045	0.014	0	0.022	0.136	0.077	0.185	0	0.01	0.221	0.008	0.003	0	0.124	0	0	0.146	0	0.002	0.013	0.161
OTU258	-0.712	5.631	0.555777	0.828923	NotSig	Bacteria	Spirochaetes	Spirochaetia	Spirochaetales	Spirochaetaceae	Unassigned	0	0	0	0	0	0	0	0	0	0	0	0.002	0	0	0	0	0	0	0	0.002	0.002	0
OTU335	-0.711	5.711	0.556778	0.829315	NotSig	Bacteria	Unassigned	Unassigned	Unassigned	Unassigned	Unassigned	0	0.001	0	0	0	0.002	0.002	0	0	0	0	0	0.003	0	0	0	0	0.007	0	0	0	0
OTU4	0.469	13.076	0.556988	0.829315	NotSig	Bacteria	Firmicutes	Bacilli	Lactobacillales	Lactobacillaceae	Lactobacillus	0.968	0.704	0.727	0.671	0.959	0.026	0.117	0.505	2.578	0.073	0.625	3.4	0.011	0.277	2.633	0.52	0.161	0.221	0.225	0.556	1.137	1.297
OTU361	0.53	6.079	0.558483	0.830833	NotSig	Bacteria	Firmicutes	Clostridia	Unassigned	Unassigned	Unassigned	0.003	0.002	0.002	0.005	0	0.005	0	0	0	0.004	0.007	0.004	0	0.009	0.003	0.003	0	0	0.002	0	0	0.002
OTU156	-0.646	6.676	0.559467	0.831589	NotSig	Bacteria	Proteobacteria	Gammaproteobacteria	Pasteurellales	Pasteurellaceae	Pasteurella	0.005	0.008	0.022	0	0	0	0	0.01	0.002	0.002	0	0.012	0.008	0.035	0.029	0.003	0	0	0.002	0	0	0.002
OTU476	0.652	6.261	0.560164	0.831918	NotSig	Bacteria	Bacteroidetes	Bacteroidia	Bacteroidales	Prevotellaceae	Prevotella	0.004	0.002	0.005	0.022	0.007	0	0.002	0	0	0	0	0.006	0.003	0	0	0.008	0	0	0	0.004	0.007	0
OTU340	0.554	5.81	0.561916	0.833366	NotSig	Bacteria	Spirochaetes	Spirochaetia	Spirochaetales	Spirochaetaceae	Unassigned	0.001	0.001	0.002	0.002	0	0	0	0	0.002	0.002	0.002	0.002	0.003	0	0	0	0	0	0	0.004	0	0
OTU646	-0.53	6.051	0.5624	0.833366	NotSig	Bacteria	Bacteroidetes	Bacteroidia	Bacteroidales	Porphyromonadaceae	Unassigned	0.002	0.002	0	0	0	0	0.004	0.003	0	0.006	0.005	0	0.003	0	0.003	0.003	0.003	0	0.002	0.002	0	0.009
OTU1305	0.772	6.384	0.56257	0.833366	NotSig	Bacteria	Firmicutes	Unassigned	Unassigned	Unassigned	Unassigned	0.005	0.003	0.007	0	0.013	0	0.022	0	0	0	0	0.006	0.022	0	0	0	0	0.005	0.002	0	0	0
OTU1072	-0.685	5.618	0.56312	0.833475	NotSig	Bacteria	Firmicutes	Unassigned	Unassigned	Unassigned	Unassigned	0	0.001	0	0	0	0	0.002	0	0	0	0	0	0	0.006	0	0	0	0	0	0	0	0
OTU1501	-0.678	5.617	0.565968	0.834552	NotSig	Bacteria	Firmicutes	Clostridia	Clostridiales	Unassigned	Unassigned	0	0	0	0	0	0	0.002	0	0	0	0	0	0	0	0	0	0	0	0	0	0	0.005
OTU46	0.435	12.724	0.566071	0.834552	NotSig	Bacteria	Bacteroidetes	Bacteroidia	Bacteroidales	Porphyromonadaceae	Unassigned	0.805	0.559	0.476	1.048	0.294	0.04	0.264	2.09	0.68	1.386	0.022	1.754	1.272	0.778	0.295	0.052	0.796	0.054	1.403	0.083	0.314	0.542
OTU1202	-0.677	5.617	0.566469	0.834552	NotSig	Bacteria	Firmicutes	Clostridia	Clostridiales	Unassigned	Unassigned	0	0	0	0	0	0	0	0	0	0.002	0	0	0	0	0	0	0	0	0	0	0	0.005
OTU1575	-0.563	13.379	0.56683	0.834552	NotSig	Bacteria	Firmicutes	Clostridia	Clostridiales	Lachnospiraceae	Clostridium_XlVa	0.881	1.174	3.511	0.179	4.431	0.009	0.158	0.17	0.023	0.104	0.027	0.197	0.025	3.095	0.013	3.117	0.055	0.37	0.056	3.063	1.904	0.043
OTU1317	-0.678	5.618	0.566843	0.834552	NotSig	Bacteria	Firmicutes	Clostridia	Clostridiales	Ruminococcaceae	Unassigned	0	0	0	0	0	0	0.002	0	0	0	0	0	0	0	0	0	0.003	0.002	0	0	0	0
OTU1708	-0.73	5.736	0.566935	0.834552	NotSig	Bacteria	Firmicutes	Clostridia	Clostridiales	Ruminococcaceae	Unassigned	0	0.001	0	0	0.002	0.002	0	0	0	0	0	0	0	0.009	0	0	0	0	0	0.002	0	0
OTU1359	-0.679	5.623	0.56719	0.834552	NotSig	Bacteria	Firmicutes	Clostridia	Clostridiales	Unassigned	Unassigned	0	0.001	0.002	0	0	0	0	0	0	0	0	0	0.003	0	0	0.003	0	0	0	0	0	0
OTU1184	-0.681	5.629	0.567899	0.834893	NotSig	Bacteria	Firmicutes	Clostridia	Clostridiales	Unassigned	Unassigned	0	0	0	0.002	0	0	0	0	0	0	0	0	0	0	0	0.003	0	0	0	0.002	0	0
OTU998	-0.68	5.628	0.568396	0.834921	NotSig	Bacteria	Firmicutes	Clostridia	Clostridiales	Ruminococcaceae	Unassigned	0	0	0	0.002	0	0	0	0	0	0	0	0	0.003	0	0	0	0	0	0	0	0.002	0
OTU393	-0.531	11.191	0.570067	0.835579	NotSig	Bacteria	Bacteroidetes	Bacteroidia	Bacteroidales	Prevotellaceae	Prevotella	0.205	0.293	1.081	0.007	0.236	0.192	0.025	0.297	0.032	0.032	0.146	0.004	0.117	0	0.177	0.005	0.104	2.08	0.023	0.022	0.086	0.313
OTU1041	-0.676	5.627	0.570102	0.835579	NotSig	Bacteria	Firmicutes	Clostridia	Clostridiales	Ruminococcaceae	Unassigned	0	0	0	0	0	0	0	0	0	0	0	0.002	0	0.003	0	0	0	0	0	0.002	0	0
OTU961	0.587	5.807	0.570278	0.835579	NotSig	Bacteria	Firmicutes	Clostridia	Clostridiales	Unassigned	Unassigned	0.001	0.001	0	0.005	0.004	0	0.002	0	0	0.002	0	0	0.003	0	0	0	0	0	0	0	0.002	0.002
OTU444	-0.57	7.713	0.572531	0.837695	NotSig	Bacteria	Bacteroidetes	Bacteroidia	Bacteroidales	Prevotellaceae	Prevotella	0.013	0.021	0.002	0.046	0.02	0	0	0	0.004	0.008	0	0.054	0.035	0	0.066	0.008	0.074	0.007	0.009	0.002	0.002	0.002
OTU1552	-0.511	9.744	0.572963	0.837695	NotSig	Bacteria	Firmicutes	Clostridia	Clostridiales	Ruminococcaceae	Gemmiger	0.071	0.091	0.012	0.005	0.013	0.007	0.077	0.208	0.002	0.223	0.161	0.004	0	0.009	0.04	0.024	0.191	0.083	0.189	0.004	0.042	0.331
OTU1244	0.475	7.507	0.573159	0.837695	NotSig	Bacteria	Firmicutes	Clostridia	Clostridiales	Lachnospiraceae	Unassigned	0.017	0.012	0	0.044	0.002	0	0.02	0.003	0.006	0.081	0.007	0.01	0.027	0.014	0.026	0.005	0.011	0.009	0	0.006	0.013	0.005
OTU1480	0.662	5.961	0.574174	0.838066	NotSig	Bacteria	Firmicutes	Clostridia	Clostridiales	Ruminococcaceae	Unassigned	0.002	0.001	0.005	0.002	0	0	0	0	0.006	0	0	0.008	0.008	0	0	0.003	0	0.002	0	0	0	0
OTU907	0.434	6.649	0.574378	0.838066	NotSig	Bacteria	Firmicutes	Clostridia	Clostridiales	Ruminococcaceae	Unassigned	0.006	0.004	0.002	0.01	0.011	0.005	0.004	0.01	0	0.006	0.017	0	0.003	0	0.003	0.013	0.005	0.002	0.009	0.002	0.002	0.005
OTU1618	-0.46	6.786	0.574852	0.838066	NotSig	Bacteria	Firmicutes	Clostridia	Clostridiales	Clostridiaceae_1	Clostridium_sensu_stricto	0.005	0.007	0.002	0.005	0.002	0	0.002	0	0.015	0.012	0.007	0.008	0.005	0.006	0	0.003	0.008	0.005	0.016	0	0.007	0.023
OTU876	0.544	6.383	0.576321	0.839059	NotSig	Bacteria	Firmicutes	Clostridia	Clostridiales	Unassigned	Unassigned	0.004	0.003	0.002	0.002	0	0	0	0.003	0.023	0.002	0.005	0.006	0	0	0	0.005	0	0.005	0	0.006	0.007	0.005
OTU1492	-0.954	6.099	0.576938	0.839059	NotSig	Bacteria	Firmicutes	Clostridia	Clostridiales	Lachnospiraceae	Unassigned	0.001	0.003	0	0.002	0	0	0	0	0	0	0	0.012	0	0	0	0.018	0	0	0	0.01	0	0
OTU12	0.472	12.187	0.577179	0.839059	NotSig	Bacteria	Proteobacteria	Deltaproteobacteria	Desulfovibrionales	Desulfovibrionaceae	Desulfovibrio	0.531	0.419	0.557	0.46	0.375	1.609	1.429	0.01	0.079	0.331	0.32	0.135	0.06	2.594	0.156	0.46	0.15	0.038	0	0.255	0.389	0.091
OTU585	0.908	6.573	0.577453	0.839059	NotSig	Bacteria	Bacteroidetes	Bacteroidia	Bacteroidales	Prevotellaceae	Prevotella	0.007	0.003	0	0	0	0	0	0.005	0	0.067	0	0	0	0	0.026	0	0	0.005	0	0.004	0	0
OTU986	0.646	5.644	0.578266	0.839543	NotSig	Bacteria	Firmicutes	Clostridia	Clostridiales	Unassigned	Unassigned	0.001	0	0.002	0	0	0	0.004	0	0	0	0	0	0	0	0	0	0	0	0	0.002	0	0
OTU80	0.574	7.13	0.579416	0.840178	NotSig	Bacteria	Firmicutes	Erysipelotrichia	Erysipelotrichales	Erysipelotrichaceae	Faecalitalea	0.012	0.008	0.01	0.01	0.009	0.012	0.002	0.018	0	0.006	0.052	0	0	0	0.011	0	0.003	0.059	0	0.002	0	0.007
OTU143	-0.583	7.811	0.579665	0.840178	NotSig	Bacteria	Firmicutes	Bacilli	Lactobacillales	Lactobacillaceae	Lactobacillus	0.015	0.023	0	0.041	0	0	0	0.008	0	0.002	0.035	0.062	0.003	0.029	0.106	0	0.033	0.043	0.009	0.002	0.004	0.005
OTU569	-0.559	6.303	0.580755	0.84092	NotSig	Bacteria	Bacteroidetes	Bacteroidia	Bacteroidales	Prevotellaceae	Prevotella	0.003	0.004	0.005	0.007	0.007	0	0	0.005	0	0.002	0.002	0	0.005	0.003	0.029	0.003	0	0.005	0	0	0	0
OTU163	-0.707	5.806	0.581139	0.84092	NotSig	Bacteria	Unassigned	Unassigned	Unassigned	Unassigned	Unassigned	0.001	0.001	0	0	0	0	0	0.008	0	0	0	0	0	0	0	0	0	0	0.002	0.002	0.004	0.002
OTU1336	-0.637	5.613	0.582572	0.842295	NotSig	Bacteria	Firmicutes	Clostridia	Clostridiales	Unassigned	Unassigned	0	0	0	0	0	0	0.002	0	0	0	0	0	0	0	0	0	0	0.002	0	0	0	0.002
OTU1210	0.515	7.08	0.584487	0.844366	NotSig	Bacteria	Firmicutes	Unassigned	Unassigned	Unassigned	Unassigned	0.011	0.007	0.038	0	0.02	0.007	0.036	0	0	0	0.005	0.004	0.008	0.012	0	0.005	0.019	0	0.007	0.006	0.011	0.002
OTU1679	0.427	7.118	0.585407	0.844997	NotSig	Bacteria	Firmicutes	Clostridia	Clostridiales	Unassigned	Unassigned	0.01	0.008	0.01	0.002	0.007	0	0.009	0.005	0.043	0.016	0	0.012	0.019	0.006	0	0.005	0.008	0.014	0.007	0.006	0.004	0.009
OTU1150	0.562	6.565	0.586663	0.845872	NotSig	Bacteria	Firmicutes	Clostridia	Clostridiales	Ruminococcaceae	Oscillibacter	0.006	0.004	0.012	0.022	0.016	0	0.002	0	0.006	0	0.005	0	0.008	0.012	0.016	0.005	0.003	0	0	0	0	0
OTU1692	0.449	6.415	0.587097	0.845872	NotSig	Bacteria	Firmicutes	Clostridia	Clostridiales	Ruminococcaceae	Unassigned	0.005	0.003	0.012	0.002	0.011	0.002	0.005	0	0	0.006	0	0.008	0.005	0	0.003	0.008	0.005	0.002	0	0.006	0.002	0
OTU463	-0.787	6.563	0.587604	0.845872	NotSig	Bacteria	Bacteroidetes	Bacteroidia	Bacteroidales	Rikenellaceae	Alistipes	0.004	0.007	0	0.002	0	0.002	0.023	0	0	0	0.007	0	0	0.069	0	0	0.003	0	0.002	0	0	0
OTU74	-0.895	6.711	0.587949	0.845872	NotSig	Bacteria	Spirochaetes	Spirochaetia	Spirochaetales	Spirochaetaceae	Treponema	0.004	0.007	0.005	0	0.031	0	0	0	0	0	0	0.002	0	0	0	0.044	0	0	0	0.026	0	0
OTU1110	-0.372	9.15	0.58901	0.846363	NotSig	Bacteria	Firmicutes	Clostridia	Clostridiales	Ruminococcaceae	Unassigned	0.049	0.059	0.086	0.029	0.027	0.005	0.052	0.162	0.006	0.041	0.057	0.022	0.052	0.069	0.058	0.042	0.046	0.029	0.016	0.024	0.055	0.195
OTU86	-0.627	5.623	0.589259	0.846363	NotSig	Bacteria	Unassigned	Unassigned	Unassigned	Unassigned	Unassigned	0	0.001	0	0.002	0	0	0	0	0	0	0	0	0	0.006	0	0	0	0	0	0	0	0
OTU1398	0.5	8.667	0.591584	0.849005	NotSig	Bacteria	Firmicutes	Clostridia	Clostridiales	Lachnospiraceae	Dorea	0.043	0.029	0.01	0.017	0.011	0.026	0.124	0.033	0.009	0.002	0.193	0.006	0	0	0.021	0.003	0.087	0.063	0.077	0	0.009	0.029
OTU1089	0.432	10.771	0.593003	0.849282	NotSig	Bacteria	Firmicutes	Clostridia	Clostridiales	Lachnospiraceae	Roseburia	0.207	0.151	0.23	0.131	0.043	0.047	0.294	0.35	0.006	0.175	0.771	0.026	0.238	0.084	0.332	0	0.235	0.259	0.122	0.006	0.011	0.227
OTU972	-0.619	5.623	0.593009	0.849282	NotSig	Bacteria	Firmicutes	Clostridia	Clostridiales	Unassigned	Unassigned	0	0.001	0	0	0	0	0	0	0.002	0	0	0	0	0.006	0	0	0	0	0	0	0	0
OTU1228	-0.452	7.38	0.593234	0.849282	NotSig	Bacteria	Firmicutes	Clostridia	Clostridiales	Lachnospiraceae	Unassigned	0.011	0.014	0.038	0.017	0.004	0	0.005	0.013	0.002	0.01	0.015	0.008	0.014	0.003	0.026	0	0.03	0.009	0.04	0	0	0.016
OTU697	0.421	7.454	0.594532	0.849521	NotSig	Bacteria	Fibrobacteres	Fibrobacteria	Fibrobacterales	Fibrobacteraceae	Fibrobacter	0.015	0.01	0.01	0.017	0.007	0.044	0.011	0.013	0.004	0.02	0.002	0.02	0	0.006	0.013	0.018	0.003	0.007	0	0.02	0.031	0.002
OTU1744	-0.618	5.631	0.59481	0.849521	NotSig	Archaea	Euryarchaeota	Thermoplasmata	Methanomassiliicoccales	Methanomassiliicoccaceae	Methanomassiliicoccus	0	0.001	0	0	0	0	0	0	0	0	0.002	0	0	0.003	0	0	0	0	0	0	0.002	0
OTU5	-0.473	11.167	0.595183	0.849521	NotSig	Bacteria	Firmicutes	Bacilli	Lactobacillales	Streptococcaceae	Streptococcus	0.206	0.271	0.744	0.128	0.081	0.009	0.005	0.114	0.006	0.026	0.679	0.268	0.194	0.017	1.042	0.031	0.087	0.119	0.075	0.022	0.004	1.12
OTU75	0.393	11.598	0.59572	0.849521	NotSig	Bacteria	Bacteroidetes	Bacteroidia	Bacteroidales	Unassigned	Unassigned	0.352	0.234	0.572	0.136	0.207	0.108	1.131	0.266	0.577	0.045	0.203	0.28	0.12	0.182	0.182	0.293	0.027	0.124	0.014	0.441	0.907	0.054
OTU1288	0.7	6.457	0.595831	0.849521	NotSig	Bacteria	Firmicutes	Clostridia	Clostridiales	Unassigned	Unassigned	0.006	0.003	0.002	0.056	0	0	0	0	0	0	0.002	0	0.003	0.009	0.011	0	0	0.005	0	0	0.007	0
OTU950	0.544	6.044	0.596774	0.84957	NotSig	Bacteria	Firmicutes	Clostridia	Clostridiales	Ruminococcaceae	Unassigned	0.002	0.001	0.005	0	0.002	0	0	0.005	0.002	0	0.005	0.006	0.005	0	0	0	0	0	0	0.006	0.002	0
OTU1328	0.709	5.838	0.596838	0.84957	NotSig	Bacteria	Unassigned	Unassigned	Unassigned	Unassigned	Unassigned	0.002	0.001	0.012	0	0.004	0	0	0	0	0	0	0	0	0	0	0.003	0	0	0.002	0.002	0	0
OTU1106	-0.43	7.794	0.598166	0.849931	NotSig	Bacteria	Cyanobacteria/Chloroplast	Chloroplast	Unassigned	Chloroplast	Streptophyta	0.015	0.018	0.012	0.031	0.004	0	0.002	0.013	0.047	0.012	0.005	0.024	0.005	0.006	0.008	0.008	0.036	0.011	0.047	0.032	0	0.032
OTU1689	0.535	6.588	0.59824	0.849931	NotSig	Bacteria	Firmicutes	Clostridia	Clostridiales	Ruminococcaceae	Unassigned	0.006	0.004	0.014	0.01	0	0.023	0.007	0	0	0.002	0.002	0.002	0	0.017	0	0.008	0.003	0	0	0.002	0.011	0
OTU877	-0.403	6.761	0.59858	0.849931	NotSig	Bacteria	Firmicutes	Clostridia	Clostridiales	Ruminococcaceae	Unassigned	0.006	0.007	0.014	0.002	0.002	0.002	0.009	0.008	0.006	0.004	0.002	0.006	0.003	0	0.018	0.008	0.003	0.018	0	0.014	0	0.007
OTU728	-0.403	12.303	0.599036	0.849931	NotSig	Bacteria	Firmicutes	Clostridia	Clostridiales	Unassigned	Unassigned	0.441	0.556	0.44	0.036	0.297	0.649	0.032	0.292	0.021	0.779	1.834	0.036	0.175	0.447	0.211	0.154	0.224	1.034	0.58	0.212	0.544	1.978
OTU1115	0.484	7.481	0.60044	0.851233	NotSig	Bacteria	Unassigned	Unassigned	Unassigned	Unassigned	Unassigned	0.015	0.009	0.014	0	0.007	0.009	0.009	0	0.041	0.006	0.059	0.006	0	0.009	0.005	0.005	0.011	0	0.019	0.026	0.02	0
OTU1361	-0.359	9.596	0.602552	0.852802	NotSig	Bacteria	Firmicutes	Clostridia	Clostridiales	Lachnospiraceae	Unassigned	0.066	0.079	0.172	0.056	0.029	0.035	0.029	0.043	0.122	0.059	0.064	0.052	0.022	0.043	0.09	0.039	0.252	0.052	0.22	0.022	0.011	0.041
OTU1711	0.394	9.516	0.603326	0.852802	NotSig	Bacteria	Firmicutes	Clostridia	Clostridiales	Unassigned	Unassigned	0.084	0.057	0.136	0.223	0.036	0.002	0.054	0.015	0.083	0.185	0.037	0.07	0.074	0.046	0.034	0.024	0.186	0.005	0.054	0.024	0.119	0.002
OTU1024	0.544	5.726	0.603759	0.852802	NotSig	Bacteria	Firmicutes	Clostridia	Clostridiales	Unassigned	Unassigned	0.001	0	0.002	0.002	0.002	0	0	0	0	0	0.002	0	0.003	0	0	0	0	0	0	0.002	0	0
OTU995	-0.569	5.694	0.603926	0.852802	NotSig	Bacteria	Firmicutes	Clostridia	Clostridiales	Ruminococcaceae	Unassigned	0	0.001	0	0	0	0	0.002	0.003	0	0	0	0	0	0.003	0	0	0.003	0	0	0	0.002	0
OTU956	-0.509	6.027	0.604816	0.852802	NotSig	Bacteria	Firmicutes	Clostridia	Clostridiales	Unassigned	Unassigned	0.002	0.002	0.002	0	0.007	0	0.002	0	0	0	0.002	0.002	0	0	0.008	0.003	0.003	0	0.007	0.002	0	0
OTU1477	0.481	6.303	0.604933	0.852802	NotSig	Bacteria	Firmicutes	Clostridia	Clostridiales	Ruminococcaceae	Clostridium_IV	0.004	0.003	0.002	0.01	0.002	0	0	0.008	0	0.014	0.002	0.004	0	0.014	0	0.003	0	0	0.002	0	0.004	0.005
OTU1218	0.359	10.165	0.604962	0.852802	NotSig	Bacteria	Actinobacteria	Actinobacteria	Coriobacteriales	Coriobacteriaceae	Unassigned	0.126	0.089	0.079	0.107	0.09	0.11	0.122	0.112	0.131	0.225	0.164	0.119	0.014	0.11	0.029	0.024	0.036	0.065	0.033	0.02	0.418	0.138
OTU1016	-0.583	5.618	0.607641	0.855887	NotSig	Bacteria	Unassigned	Unassigned	Unassigned	Unassigned	Unassigned	0	0.001	0	0.002	0	0	0	0	0	0	0	0	0	0.003	0	0	0	0.002	0	0	0	0
OTU1490	-0.388	6.555	0.611371	0.860448	NotSig	Bacteria	Firmicutes	Clostridia	Clostridiales	Ruminococcaceae	Acetivibrio	0.004	0.006	0.01	0.005	0.009	0.002	0.004	0.005	0.004	0	0.002	0.002	0.008	0.017	0.008	0.005	0.011	0	0	0	0.007	0.002
OTU1114	0.331	8.182	0.612079	0.860751	NotSig	Bacteria	Firmicutes	Clostridia	Clostridiales	Ruminococcaceae	Oscillibacter	0.029	0.022	0.091	0.029	0.036	0.009	0.014	0.015	0.026	0.016	0.012	0.038	0.011	0.032	0.026	0.029	0.005	0.043	0.012	0.02	0.027	0.011
OTU908	0.685	6.418	0.613592	0.861266	NotSig	Bacteria	Unassigned	Unassigned	Unassigned	Unassigned	Unassigned	0.005	0.002	0	0.015	0	0.002	0	0	0.008	0	0.005	0.02	0	0	0	0.005	0	0	0	0.018	0	0
OTU528	-0.707	6.177	0.613933	0.861266	NotSig	Bacteria	Bacteroidetes	Bacteroidia	Bacteroidales	Prevotellaceae	Prevotella	0.002	0.003	0.007	0.007	0.007	0	0	0	0	0	0	0	0	0	0.003	0.016	0	0	0	0.012	0	0
OTU1589	-0.628	6.114	0.614322	0.861266	NotSig	Bacteria	Firmicutes	Clostridia	Clostridiales	Lachnospiraceae	Unassigned	0.002	0.003	0	0.005	0	0	0	0	0	0	0.01	0.004	0.003	0	0	0	0.011	0.011	0.005	0	0	0
OTU776	-0.573	5.628	0.614415	0.861266	NotSig	Bacteria	Actinobacteria	Actinobacteria	Actinomycetales	Microbacteriaceae	Leucobacter	0	0	0	0	0.002	0	0	0	0	0	0	0	0	0	0	0	0	0.002	0	0.002	0	0
OTU97	0.426	8.171	0.61605	0.862865	NotSig	Bacteria	Firmicutes	Unassigned	Unassigned	Unassigned	Unassigned	0.028	0.019	0.007	0.041	0	0.014	0.002	0.025	0.081	0.049	0.002	0.054	0.003	0.029	0.013	0.021	0.033	0	0.037	0.036	0.002	0.018
OTU1221	-0.403	7.521	0.618127	0.865081	NotSig	Bacteria	Firmicutes	Clostridia	Clostridiales	Lachnospiraceae	Unassigned	0.013	0.015	0.005	0.031	0	0	0.007	0.013	0.002	0.028	0.03	0.012	0.011	0.003	0.011	0.003	0.016	0.007	0.016	0.002	0.027	0.054
OTU1399	-0.471	7.091	0.61883	0.865372	NotSig	Bacteria	Firmicutes	Clostridia	Clostridiales	Unassigned	Unassigned	0.008	0.011	0	0.017	0	0.002	0.03	0.005	0	0.002	0.005	0.016	0	0.009	0.066	0.016	0.003	0.005	0	0.008	0.002	0.005
OTU1161	0.644	6.061	0.621056	0.86779	NotSig	Bacteria	Firmicutes	Clostridia	Clostridiales	Clostridiales_Incertae_Sedis_XIII	Mogibacterium	0.003	0.002	0.002	0	0	0.005	0	0.003	0	0	0.017	0	0.003	0	0	0	0.003	0.011	0	0	0	0
OTU945	-0.644	6.454	0.62327	0.869772	NotSig	Bacteria	Lentisphaerae	Oligosphaeria	Oligosphaerales	Oligosphaeraceae	Oligosphaera	0.003	0.006	0.002	0.002	0.002	0	0.023	0.003	0	0	0	0	0.025	0.029	0	0	0.005	0	0	0	0	0
OTU1003	-0.452	7.757	0.623667	0.869772	NotSig	Bacteria	Firmicutes	Clostridia	Clostridiales	Ruminococcaceae	Unassigned	0.014	0.017	0	0.027	0.002	0	0.004	0.013	0.041	0.032	0	0.026	0.005	0.006	0	0.034	0.016	0.011	0.028	0.061	0.002	0.007
OTU1166	0.616	5.805	0.624409	0.869772	NotSig	Bacteria	Firmicutes	Clostridia	Clostridiales	Ruminococcaceae	Unassigned	0.001	0.001	0	0	0.004	0	0	0	0.004	0.004	0	0	0	0.003	0	0.005	0	0	0	0	0	0
OTU1632	-0.541	5.613	0.624904	0.869772	NotSig	Bacteria	Proteobacteria	Alphaproteobacteria	Unassigned	Unassigned	Unassigned	0	0	0	0	0	0	0	0	0	0	0	0.002	0	0	0	0	0	0.005	0	0	0	0
OTU1416	-0.333	8.549	0.625202	0.869772	NotSig	Bacteria	Firmicutes	Clostridia	Clostridiales	Lachnospiraceae	Lachnospiracea_incertae_sedis	0.03	0.035	0.019	0.019	0.007	0.016	0.043	0.03	0.034	0.047	0.027	0.052	0.025	0.017	0.011	0.021	0.016	0.052	0.007	0.018	0.066	0.12
OTU747	0.673	6.06	0.626265	0.869772	NotSig	Bacteria	Actinobacteria	Actinobacteria	Actinomycetales	Corynebacteriaceae	Corynebacterium	0.003	0.001	0	0	0	0	0.02	0	0	0	0.002	0.004	0	0	0	0.003	0	0	0	0.006	0	0.005
OTU164	-0.725	6.431	0.626322	0.869772	NotSig	Bacteria	Unassigned	Unassigned	Unassigned	Unassigned	Unassigned	0.003	0.005	0	0.002	0	0	0	0.005	0	0	0	0.022	0	0.003	0	0	0	0.038	0	0	0	0.014
OTU1123	-0.542	6.294	0.626455	0.869772	NotSig	Bacteria	Firmicutes	Clostridia	Clostridiales	Ruminococcaceae	Unassigned	0.003	0.004	0	0	0	0	0.002	0.01	0	0.006	0.01	0	0.011	0	0.016	0.003	0	0	0	0.004	0	0.007
OTU953	-0.623	5.912	0.627539	0.870586	NotSig	Bacteria	Firmicutes	Unassigned	Unassigned	Unassigned	Unassigned	0.001	0.002	0	0	0	0	0	0	0.008	0	0	0.002	0	0	0	0.003	0	0	0	0.006	0.002	0.005
OTU435	0.473	7.918	0.628046	0.870599	NotSig	Bacteria	Bacteroidetes	Bacteroidia	Bacteroidales	Unassigned	Unassigned	0.025	0.018	0.017	0.136	0.031	0.002	0.034	0.015	0	0.014	0	0	0.06	0.063	0.008	0.018	0.014	0.011	0	0.004	0.002	0
OTU147	-0.498	6.845	0.630273	0.872993	NotSig	Bacteria	Proteobacteria	Gammaproteobacteria	Pasteurellales	Pasteurellaceae	Unassigned	0.006	0.008	0.002	0.002	0	0	0.002	0.036	0	0.012	0.007	0	0.003	0.037	0.005	0.005	0	0	0.007	0.02	0	0.002
OTU47	-0.327	10.956	0.631113	0.873464	NotSig	Bacteria	Bacteroidetes	Bacteroidia	Bacteroidales	Porphyromonadaceae	Unassigned	0.175	0.214	0.069	0.235	0.027	0.157	0.726	0.056	0.16	0.061	0.146	0.109	0.363	0.101	0.145	0.047	0.457	0.248	0.075	0.101	0.241	0.358
OTU864	0.405	6.424	0.632594	0.874821	NotSig	Bacteria	Firmicutes	Clostridia	Clostridiales	Unassigned	Unassigned	0.005	0.003	0.005	0.01	0.004	0	0.005	0.003	0.015	0.002	0	0.002	0.003	0.003	0.013	0.005	0	0.005	0	0.006	0	0
OTU51	-0.699	9.838	0.633704	0.875664	NotSig	Bacteria	Spirochaetes	Spirochaetia	Spirochaetales	Spirochaetaceae	Treponema	0.059	0.09	0	0.007	0	0.028	0.002	0	0.46	0	0.062	0.034	0	0	0	0.29	0	0	0	0.329	0.279	0
OTU418	-0.426	9.101	0.635274	0.87714	NotSig	Bacteria	Bacteroidetes	Bacteroidia	Bacteroidales	Prevotellaceae	Prevotella	0.045	0.063	0.033	0.022	0.02	0.026	0.009	0.15	0.039	0.067	0.077	0.002	0.131	0.017	0.1	0.003	0	0.338	0	0.002	0.013	0.029
OTU1696	0.325	9.316	0.637315	0.878866	NotSig	Bacteria	Firmicutes	Clostridia	Clostridiales	Peptostreptococcaceae	Unassigned	0.067	0.049	0.022	0.087	0.018	0.026	0.041	0.023	0.107	0.185	0.02	0.143	0.041	0.032	0.024	0.052	0.011	0.032	0.03	0.055	0.093	0.12
OTU1129	-0.584	5.704	0.637691	0.878866	NotSig	Bacteria	Firmicutes	Clostridia	Clostridiales	Ruminococcaceae	Oscillibacter	0	0.001	0	0	0	0	0	0.003	0	0	0	0.002	0	0	0	0	0	0	0.005	0	0.002	0
OTU1286	0.565	5.983	0.638032	0.878866	NotSig	Bacteria	Unassigned	Unassigned	Unassigned	Unassigned	Unassigned	0.002	0.001	0	0.005	0	0	0.004	0	0	0.002	0.012	0	0	0	0.005	0	0	0.007	0	0	0	0.002
OTU45	-0.34	12.601	0.639885	0.880084	NotSig	Bacteria	Bacteroidetes	Bacteroidia	Bacteroidales	Unassigned	Unassigned	0.582	0.723	1.095	1.472	0.499	0.108	0.457	0.637	0.329	0.404	0.287	0.537	0.909	0.507	2.071	1.778	0.112	1.046	0.016	0.675	0.035	0.077
OTU1206	-0.506	5.75	0.640219	0.880084	NotSig	Bacteria	Firmicutes	Clostridia	Clostridiales	Ruminococcaceae	Unassigned	0.001	0.001	0	0.002	0	0	0	0	0	0.002	0	0.002	0.003	0	0.005	0	0	0	0	0.002	0	0
OTU1530	0.489	5.999	0.64046	0.880084	NotSig	Bacteria	Firmicutes	Clostridia	Clostridiales	Ruminococcaceae	Unassigned	0.002	0.001	0	0.002	0.002	0.002	0.013	0	0	0.002	0	0	0	0	0	0	0	0.005	0	0.004	0.002	0.002
OTU1031	0.446	9.401	0.641652	0.880084	NotSig	Bacteria	Firmicutes	Clostridia	Clostridiales	Ruminococcaceae	Unassigned	0.076	0.058	0.122	0.012	0.054	0.002	0.351	0.041	0.017	0.059	0.015	0.086	0.442	0.009	0.055	0	0.005	0.045	0.002	0	0.002	0.018
OTU521	0.585	6.741	0.642625	0.880084	NotSig	Bacteria	Bacteroidetes	Bacteroidia	Bacteroidales	Prevotellaceae	Prevotella	0.007	0.005	0.005	0.027	0.043	0	0	0	0	0	0	0	0.025	0.003	0.005	0.005	0	0	0	0.006	0.004	0
OTU2	-0.293	14.437	0.642775	0.880084	NotSig	Bacteria	Firmicutes	Negativicutes	Selenomonadales	Acidaminococcaceae	Phascolarctobacterium	2.043	2.358	1.944	4.324	1.251	3.644	1.108	3.27	0.762	1.796	1.197	1.133	2.179	2.179	1.251	0.852	3.915	2.274	2.381	0.433	4.678	3.44
OTU885	-0.376	6.353	0.642784	0.880084	NotSig	Bacteria	Firmicutes	Clostridia	Clostridiales	Unassigned	Unassigned	0.003	0.004	0.005	0	0.002	0	0.009	0.003	0.004	0	0.005	0.004	0	0.012	0.003	0	0	0.007	0.002	0.002	0.007	0.009
OTU1674	-0.326	9.503	0.642945	0.880084	NotSig	Bacteria	Actinobacteria	Actinobacteria	Coriobacteriales	Coriobacteriaceae	Unassigned	0.061	0.068	0.077	0.015	0.063	0.002	0.086	0.046	0.118	0.095	0.062	0.048	0.014	0.035	0.029	0.131	0.038	0.043	0.094	0.182	0.031	0.082
OTU1349	-0.346	9.283	0.645467	0.882845	NotSig	Bacteria	Firmicutes	Clostridia	Clostridiales	Ruminococcaceae	Clostridium_IV	0.056	0.071	0.108	0.196	0.022	0.002	0.034	0.033	0.008	0.049	0.027	0.078	0.052	0.196	0.256	0.01	0.055	0.027	0.007	0.01	0.024	0.068
OTU328	-0.783	6.218	0.650455	0.888009	NotSig	Bacteria	Firmicutes	Unassigned	Unassigned	Unassigned	Unassigned	0.002	0.004	0	0	0	0	0	0	0	0.004	0.017	0	0	0	0	0	0	0.005	0	0	0	0.032
OTU1186	-0.539	5.691	0.65145	0.888009	NotSig	Bacteria	Firmicutes	Clostridia	Clostridiales	Ruminococcaceae	Unassigned	0	0.001	0	0	0.002	0	0.002	0	0	0	0	0	0	0.006	0	0	0.003	0	0	0	0	0
OTU1157	0.575	6.116	0.651499	0.888009	NotSig	Bacteria	Firmicutes	Clostridia	Clostridiales	Unassigned	Unassigned	0.003	0.002	0.005	0	0.004	0.014	0	0	0	0	0	0.004	0	0.009	0	0	0	0.009	0	0.002	0	0
OTU1238	-0.387	5.926	0.651882	0.888009	NotSig	Bacteria	Firmicutes	Clostridia	Clostridiales	Ruminococcaceae	Oscillibacter	0.001	0.002	0.002	0	0.004	0	0.002	0	0	0.002	0	0.002	0	0.003	0.003	0.005	0	0	0	0.002	0.002	0.002
OTU927	-0.385	5.888	0.652299	0.888009	NotSig	Bacteria	Unassigned	Unassigned	Unassigned	Unassigned	Unassigned	0.001	0.001	0	0.002	0.002	0.002	0	0	0	0.002	0.002	0	0.003	0.003	0.003	0	0	0	0.002	0.002	0.002	0
OTU1169	-0.731	5.776	0.653013	0.888009	NotSig	Bacteria	Synergistetes	Synergistia	Synergistales	Synergistaceae	Unassigned	0.001	0.001	0	0	0.002	0	0.004	0	0	0	0	0	0	0.014	0	0	0	0	0	0	0	0
OTU161	-0.488	6.594	0.653372	0.888009	NotSig	Bacteria	Spirochaetes	Spirochaetia	Spirochaetales	Spirochaetaceae	Treponema	0.005	0.006	0	0.022	0	0.002	0.007	0	0	0.01	0	0.004	0.005	0	0	0.003	0	0.005	0.002	0.004	0	0.039
OTU370	-0.31	12.696	0.653649	0.888009	NotSig	Bacteria	Bacteroidetes	Bacteroidia	Bacteroidales	Prevotellaceae	Prevotella	0.591	0.732	0.734	0.896	0.694	0.323	0.253	0.386	0.809	0.073	0.352	1.39	0.808	0.447	1.559	0.455	2.586	0.068	0.297	0.368	0.613	0.12
OTU707	0.279	13.223	0.653948	0.888009	NotSig	Bacteria	Firmicutes	Clostridia	Clostridiales	Ruminococcaceae	Unassigned	1.08	0.803	1.5	0.85	0.775	1.061	1.004	0.517	0.413	1.591	2.332	0.758	1.037	0.233	0.182	0.991	1.017	0.59	1.357	0.883	0.765	0.977
OTU733	-0.295	15.583	0.654589	0.888009	NotSig	Bacteria	Firmicutes	Clostridia	Clostridiales	Clostridiaceae_1	Clostridium_sensu_stricto	4.515	5.057	4.656	2.491	2.406	0.356	6.051	2.078	9.209	11.635	1.653	4.611	4.892	5	1.266	3.852	2.808	3.279	6.89	4.37	8.882	9.33
OTU25	-0.454	10.389	0.654918	0.888009	NotSig	Bacteria	Bacteroidetes	Bacteroidia	Bacteroidales	Prevotellaceae	Prevotella	0.107	0.164	0.155	0.007	0.038	0.473	0.005	0.205	0.004	0.099	0.057	0.022	0.833	0.006	0.361	0	0.005	0.367	0.002	0	0.004	0.064
OTU1128	0.915	5.809	0.655338	0.888009	NotSig	Bacteria	Firmicutes	Clostridia	Clostridiales	Eubacteriaceae	Eubacterium	0.002	0.001	0	0	0	0	0	0.015	0	0	0	0	0	0	0	0	0	0.007	0	0	0	0
OTU806	-0.396	8.939	0.657182	0.889818	NotSig	Bacteria	Firmicutes	Clostridia	Clostridiales	Unassigned	Unassigned	0.039	0.048	0.014	0.024	0	0	0.034	0.084	0.064	0.012	0.109	0.048	0.038	0	0.011	0.003	0.077	0.05	0.124	0.002	0.027	0.15
OTU859	0.318	6.691	0.658744	0.891242	NotSig	Bacteria	Firmicutes	Clostridia	Clostridiales	Ruminococcaceae	Unassigned	0.006	0.005	0	0.005	0.009	0.005	0.005	0	0.013	0.01	0.005	0.01	0.011	0.006	0.008	0.003	0.005	0	0.007	0.004	0.002	0.005
OTU1104	-0.312	8.329	0.659446	0.891286	NotSig	Bacteria	Firmicutes	Clostridia	Clostridiales	Unassigned	Unassigned	0.024	0.031	0.026	0.012	0.031	0.026	0.054	0.008	0.047	0.03	0.01	0	0.016	0.072	0.021	0.031	0.068	0.009	0.028	0.026	0.018	0.016
OTU838	-0.434	7.334	0.659796	0.891286	NotSig	Bacteria	Firmicutes	Clostridia	Clostridiales	Ruminococcaceae	Unassigned	0.01	0.011	0.007	0.005	0.007	0	0	0.018	0.011	0.002	0.01	0.038	0	0	0	0	0.016	0.007	0.019	0.008	0.06	0.005
OTU1548	-0.474	5.832	0.661458	0.892559	NotSig	Bacteria	Firmicutes	Clostridia	Clostridiales	Ruminococcaceae	Clostridium_IV	0.001	0.001	0.002	0	0.002	0.002	0.002	0	0	0	0	0	0	0	0	0	0.005	0	0	0.004	0.002	0
OTU20	-0.382	10.145	0.662448	0.892559	NotSig	Bacteria	Firmicutes	Negativicutes	Selenomonadales	Veillonellaceae	Anaerovibrio	0.106	0.129	0.251	0.208	0.02	0.019	0.02	0.015	0.038	0.422	0.04	0.026	0.137	0.118	0.256	0.003	0.56	0.014	0.021	0	0.004	0.175
OTU1294	-0.317	7.216	0.66266	0.892559	NotSig	Bacteria	Actinobacteria	Actinobacteria	Coriobacteriales	Coriobacteriaceae	Unassigned	0.009	0.011	0.002	0.005	0.004	0.009	0.004	0.008	0.009	0.045	0.007	0	0.014	0.003	0.016	0.008	0.005	0.027	0.012	0.014	0.007	0.007
OTU598	0.549	5.622	0.663228	0.892559	NotSig	Bacteria	Bacteroidetes	Bacteroidia	Bacteroidales	Prevotellaceae	Prevotella	0.001	0	0	0	0	0	0	0.005	0	0	0	0	0	0	0	0	0	0.002	0	0	0	0
OTU1141	0.419	6.007	0.663463	0.892559	NotSig	Bacteria	Cyanobacteria/Chloroplast	Chloroplast	Unassigned	Chloroplast	Streptophyta	0.002	0.001	0.002	0.007	0	0	0	0.008	0.002	0.002	0	0.002	0	0.003	0	0	0	0.002	0.007	0.002	0	0
OTU1164	-0.4	7.226	0.664365	0.892559	NotSig	Bacteria	Firmicutes	Clostridia	Clostridiales	Unassigned	Unassigned	0.009	0.011	0	0.024	0.011	0.023	0	0.02	0.004	0.002	0	0.004	0.005	0.009	0	0.003	0.036	0.018	0.037	0.002	0.002	0.002
OTU1156	-0.568	5.945	0.664384	0.892559	NotSig	Bacteria	Firmicutes	Clostridia	Clostridiales	Ruminococcaceae	Unassigned	0.001	0.002	0.002	0.007	0	0	0	0	0	0.002	0	0.002	0.011	0	0.011	0	0	0	0	0	0	0
OTU901	0.312	6.366	0.665048	0.892559	NotSig	Bacteria	Firmicutes	Clostridia	Clostridiales	Ruminococcaceae	Unassigned	0.004	0.003	0	0.007	0.002	0.002	0.004	0.008	0.002	0.006	0.007	0.004	0.005	0.003	0.008	0.005	0	0.002	0	0.004	0.004	0
OTU1389	-0.341	8.834	0.665334	0.892559	NotSig	Bacteria	Firmicutes	Clostridia	Clostridiales	Lachnospiraceae	Unassigned	0.038	0.043	0.026	0	0.029	0.023	0.022	0.02	0.034	0.215	0.002	0.008	0.019	0.037	0.021	0.016	0.074	0.029	0.138	0.01	0.058	0.027
OTU676	0.544	5.636	0.668354	0.895923	NotSig	Bacteria	Bacteroidetes	Bacteroidia	Bacteroidales	Porphyromonadaceae	Unassigned	0	0	0	0	0	0.005	0	0	0	0	0	0	0.003	0	0	0	0	0	0	0	0	0
OTU1584	-0.485	5.674	0.670654	0.898317	NotSig	Bacteria	Proteobacteria	Alphaproteobacteria	Rhodospirillales	Rhodospirillaceae	Unassigned	0	0.001	0	0.002	0	0	0	0	0	0.002	0	0	0	0.003	0	0	0	0.005	0	0	0	0
OTU941	-0.463	6.147	0.672569	0.899566	NotSig	Bacteria	Firmicutes	Clostridia	Clostridiales	Ruminococcaceae	Unassigned	0.002	0.003	0.01	0.005	0.002	0	0.002	0	0	0	0	0.004	0	0	0.003	0	0.011	0	0.009	0.004	0	0
OTU1491	0.322	6.384	0.672616	0.899566	NotSig	Bacteria	Firmicutes	Clostridia	Clostridiales	Lachnospiraceae	Unassigned	0.004	0.003	0.007	0	0.004	0.002	0.005	0.005	0.006	0.004	0	0.008	0.008	0.003	0.003	0.008	0.003	0	0.007	0.002	0	0
OTU772	0.379	11.766	0.673541	0.899626	NotSig	Bacteria	Firmicutes	Clostridia	Clostridiales	Unassigned	Unassigned	0.406	0.286	0.251	0.983	0.002	0.002	0.131	0.322	0.081	0.089	0.714	1.489	0.259	0.196	0.106	0	0.845	0.056	0.784	0.006	0.159	0.445
OTU640	-0.4	8.318	0.673691	0.899626	NotSig	Bacteria	Bacteroidetes	Bacteroidia	Bacteroidales	Porphyromonadaceae	Unassigned	0.026	0.028	0.12	0.031	0.029	0	0.036	0.005	0	0.03	0.005	0.008	0.06	0.006	0.008	0.071	0	0.011	0	0.107	0.009	0.007
OTU179	-0.474	6.057	0.675266	0.901042	NotSig	Bacteria	Proteobacteria	Betaproteobacteria	Burkholderiales	Sutterellaceae	Parasutterella	0.002	0.003	0	0.002	0.002	0.007	0	0.005	0	0	0	0	0.008	0	0.011	0	0	0	0	0	0.002	0.005
OTU937	0.423	6.176	0.678355	0.903249	NotSig	Bacteria	Firmicutes	Clostridia	Clostridiales	Unassigned	Unassigned	0.003	0.002	0	0.01	0	0	0.004	0	0.013	0.004	0	0	0	0.009	0.003	0.005	0	0	0	0.002	0.002	0.002
OTU1717	-0.509	5.711	0.678398	0.903249	NotSig	Bacteria	Firmicutes	Clostridia	Clostridiales	Ruminococcaceae	Unassigned	0	0.001	0	0	0	0.002	0	0	0	0	0.002	0	0	0	0	0	0	0	0	0.004	0.002	0
OTU869	0.286	9.144	0.678885	0.903249	NotSig	Bacteria	Firmicutes	Clostridia	Clostridiales	Ruminococcaceae	Unassigned	0.059	0.045	0.062	0.077	0.027	0.066	0.1	0.018	0.032	0.12	0.037	0.052	0.041	0.098	0.003	0.013	0.022	0.05	0.028	0.012	0.15	0.034
OTU1370	0.516	5.716	0.679266	0.903249	NotSig	Bacteria	Firmicutes	Clostridia	Clostridiales	Unassigned	Unassigned	0.001	0.001	0.005	0	0	0	0	0.003	0	0	0	0.002	0.005	0	0	0	0	0	0	0	0	0
OTU356	0.519	5.638	0.679504	0.903249	NotSig	Bacteria	Unassigned	Unassigned	Unassigned	Unassigned	Unassigned	0	0	0	0	0	0.005	0	0	0	0	0	0	0	0	0	0	0	0	0	0	0.002	0
OTU1447	0.587	6.971	0.681979	0.905465	NotSig	Bacteria	Firmicutes	Clostridia	Clostridiales	Lachnospiraceae	Unassigned	0.009	0.006	0	0	0	0	0.065	0.005	0.021	0	0	0.004	0	0	0.04	0	0.011	0	0.014	0	0	0
OTU1408	0.32	7.189	0.682207	0.905465	NotSig	Bacteria	Unassigned	Unassigned	Unassigned	Unassigned	Unassigned	0.012	0.009	0.012	0.015	0	0	0.039	0.003	0.004	0.018	0.005	0.022	0.003	0.014	0.016	0.013	0.003	0.029	0.002	0.006	0.004	0.002
OTU152	0.497	6.741	0.683218	0.906119	NotSig	Bacteria	Chlamydiae	Chlamydiia	Chlamydiales	Chlamydiaceae	Chlamydia	0.007	0.004	0	0.027	0.002	0.016	0	0	0.002	0.024	0	0.004	0	0	0.003	0.003	0	0	0	0	0.035	0.002
OTU36	-0.395	11.275	0.684015	0.906307	NotSig	Bacteria	Bacteroidetes	Unassigned	Unassigned	Unassigned	Unassigned	0.218	0.28	0.019	0.017	0	0	0.766	0.492	0.28	0.581	0.01	0.016	0.434	0.052	1.039	0.706	0.025	0.027	0.014	0.39	0.011	0.107
OTU374	-0.493	10.447	0.685066	0.906307	NotSig	Bacteria	Bacteroidetes	Unassigned	Unassigned	Unassigned	Unassigned	0.118	0.141	0.108	0.605	0.319	0.044	0.02	0	0	0	0	0.084	0.014	0	0	0.79	0.041	0.007	0.023	0.491	0.049	0
OTU1005	0.502	5.627	0.68542	0.906307	NotSig	Bacteria	Firmicutes	Clostridia	Clostridiales	Ruminococcaceae	Unassigned	0	0	0	0	0	0	0	0	0	0	0.005	0	0	0	0.003	0	0	0	0	0	0	0
OTU1047	0.391	5.967	0.68555	0.906307	NotSig	Bacteria	Firmicutes	Clostridia	Clostridiales	Ruminococcaceae	Unassigned	0.002	0.002	0.002	0	0.002	0	0.002	0	0	0.002	0.01	0.002	0.003	0.003	0	0	0.003	0.007	0	0	0	0
OTU442	0.438	8.214	0.686329	0.906307	NotSig	Bacteria	Bacteroidetes	Bacteroidia	Bacteroidales	Prevotellaceae	Prevotella	0.031	0.019	0.002	0.14	0.011	0.019	0.002	0	0.024	0.114	0	0	0	0.037	0.005	0.005	0.008	0.002	0	0.008	0.122	0.002
OTU1043	-0.648	5.681	0.686654	0.906307	NotSig	Bacteria	Unassigned	Unassigned	Unassigned	Unassigned	Unassigned	0	0.001	0	0	0	0	0.004	0	0	0	0	0	0	0	0	0.008	0	0	0	0	0	0
OTU1682	0.622	6.706	0.687477	0.906307	NotSig	Bacteria	Actinobacteria	Actinobacteria	Coriobacteriales	Coriobacteriaceae	Unassigned	0.007	0.005	0	0	0.009	0	0	0.01	0	0.002	0.052	0	0	0	0	0	0	0.047	0	0.002	0	0
OTU718	0.342	11.364	0.687508	0.906307	NotSig	Bacteria	Firmicutes	Clostridia	Clostridiales	Unassigned	Unassigned	0.297	0.216	0.187	0.002	0.085	0.44	0.723	0.048	0.004	0.648	0.828	0.004	0.052	0.141	0.053	0.201	0.027	0.426	0.019	0.247	0.442	0.549
OTU315	-0.445	7.34	0.689013	0.907607	NotSig	Bacteria	Unassigned	Unassigned	Unassigned	Unassigned	Unassigned	0.01	0.013	0	0.027	0	0	0	0.02	0.024	0.002	0.01	0.016	0	0.037	0	0.018	0	0	0.016	0.016	0	0.043
OTU1667	0.643	5.916	0.690079	0.908327	NotSig	Bacteria	Firmicutes	Clostridia	Clostridiales	Unassigned	Unassigned	0.002	0.001	0	0.015	0	0	0.004	0	0	0	0	0.002	0	0	0	0	0.011	0	0	0	0	0
OTU1162	0.382	5.797	0.692422	0.910725	NotSig	Bacteria	Firmicutes	Clostridia	Clostridiales	Unassigned	Unassigned	0.001	0.001	0	0.002	0	0.002	0	0.003	0	0.002	0.002	0	0	0	0	0	0.003	0	0.002	0.002	0	0
OTU1301	-0.476	6.459	0.693164	0.911016	NotSig	Bacteria	Firmicutes	Clostridia	Clostridiales	Unassigned	Unassigned	0.003	0.005	0.002	0	0	0	0.005	0	0.011	0	0	0.014	0.003	0.006	0	0	0.033	0.002	0	0	0.007	0
OTU1257	0.346	8.672	0.694063	0.911512	NotSig	Bacteria	Firmicutes	Clostridia	Clostridiales	Ruminococcaceae	Unassigned	0.044	0.031	0.158	0.002	0.067	0.005	0.093	0.008	0.017	0.065	0	0.02	0.011	0.04	0.04	0.071	0.044	0.011	0.082	0.016	0	0
OTU1541	0.477	5.705	0.696535	0.913583	NotSig	Bacteria	Actinobacteria	Actinobacteria	Coriobacteriales	Coriobacteriaceae	Collinsella	0.001	0	0	0	0	0	0.005	0.003	0	0	0	0	0	0	0	0	0	0.002	0.002	0	0	0
OTU1397	0.385	8.166	0.696685	0.913583	NotSig	Bacteria	Firmicutes	Clostridia	Clostridiales	Lachnospiraceae	Unassigned	0.029	0.021	0.026	0.019	0	0	0.038	0.076	0.006	0.006	0.089	0.028	0.005	0	0.013	0.016	0	0.023	0.002	0.01	0	0.136
OTU28	0.286	10.842	0.697702	0.914031	NotSig	Bacteria	Bacteroidetes	Bacteroidia	Bacteroidales	Prevotellaceae	Prevotella	0.211	0.159	0.124	0.375	0.133	0.009	0.325	0.665	0.054	0.367	0.02	0.034	0.106	0.029	0.079	0.118	0.555	0.327	0.03	0.103	0.173	0.075
OTU740	0.301	11.1	0.698073	0.914031	NotSig	Bacteria	Firmicutes	Clostridia	Clostridiales	Unassigned	Unassigned	0.243	0.176	0.014	0.123	0.004	0.122	1.497	0.223	0.122	0.203	0.072	0.048	0.068	0.15	0.066	0.107	0.082	0.176	0.157	0.139	0.626	0.186
OTU601	0.875	5.993	0.699403	0.914961	NotSig	Bacteria	Bacteroidetes	Bacteroidia	Bacteroidales	Prevotellaceae	Prevotella	0.002	0.001	0	0	0	0	0	0	0	0	0.025	0	0	0	0.013	0	0	0	0	0	0	0
OTU394	-0.261	10.806	0.69983	0.914961	NotSig	Bacteria	Bacteroidetes	Bacteroidia	Bacteroidales	Porphyromonadaceae	Unassigned	0.168	0.202	0.069	0.298	0.079	0.117	0.194	0.193	0.081	0.544	0.005	0.097	0.308	0.631	0.185	0.23	0.139	0.21	0.061	0.119	0.088	0.045
OTU1001	0.508	5.807	0.70121	0.915596	NotSig	Bacteria	Firmicutes	Clostridia	Clostridiales	Unassigned	Unassigned	0.001	0.001	0	0.002	0.002	0.007	0	0	0	0	0	0	0	0	0	0.003	0	0	0	0	0.004	0
OTU1054	0.483	5.777	0.701608	0.915596	NotSig	Bacteria	Firmicutes	Clostridia	Clostridiales	Ruminococcaceae	Unassigned	0.001	0.001	0	0.007	0	0	0	0.005	0	0	0	0	0	0	0.003	0.003	0	0.002	0	0	0	0
OTU1334	0.465	5.623	0.701887	0.915596	NotSig	Bacteria	Firmicutes	Clostridia	Clostridiales	Ruminococcaceae	Unassigned	0	0	0	0.002	0	0	0	0	0	0	0.002	0	0	0	0.003	0	0	0	0	0	0	0
OTU974	0.469	5.711	0.703811	0.917421	NotSig	Bacteria	Firmicutes	Clostridia	Clostridiales	Unassigned	Unassigned	0.001	0.001	0.007	0	0	0	0	0	0	0	0	0.002	0	0.003	0	0	0	0	0	0	0.002	0
OTU205	-0.431	5.889	0.705688	0.919182	NotSig	Bacteria	Proteobacteria	Gammaproteobacteria	Oceanospirillales	Halomonadaceae	Halomonas	0.001	0.001	0	0	0	0	0	0.003	0	0.002	0.005	0.002	0	0	0	0	0	0	0.005	0	0.007	0.002
OTU92	-0.491	5.91	0.707128	0.920153	NotSig	Bacteria	Proteobacteria	Deltaproteobacteria	Desulfovibrionales	Desulfovibrionaceae	Desulfovibrio	0.001	0.002	0	0	0	0	0.009	0.003	0	0	0	0	0	0.012	0	0	0	0	0	0.002	0.002	0.002
OTU140	-0.403	7.195	0.707685	0.920153	NotSig	Bacteria	Firmicutes	Unassigned	Unassigned	Unassigned	Unassigned	0.009	0.011	0.002	0.036	0	0.007	0	0.003	0.009	0.004	0.01	0.018	0.003	0.003	0	0	0	0.014	0.009	0	0	0.084
OTU1057	0.452	5.626	0.708852	0.920153	NotSig	Bacteria	Firmicutes	Unassigned	Unassigned	Unassigned	Unassigned	0	0	0.002	0	0	0.002	0	0	0	0	0	0	0.003	0	0	0	0	0	0	0	0	0
OTU632	-0.368	8.451	0.709449	0.920153	NotSig	Bacteria	Bacteroidetes	Bacteroidia	Bacteroidales	Prevotellaceae	Unassigned	0.027	0.033	0.002	0.099	0	0.005	0	0.041	0.086	0.004	0.002	0.028	0.005	0.11	0.016	0.013	0.003	0.025	0	0.006	0.15	0.005
OTU1500	0.406	6.136	0.710293	0.920153	NotSig	Bacteria	Firmicutes	Clostridia	Clostridiales	Lachnospiraceae	Unassigned	0.003	0.002	0.005	0	0.007	0	0	0	0	0	0.002	0.014	0.005	0	0.003	0.003	0	0	0	0.004	0.004	0
OTU557	-0.431	5.697	0.710714	0.920153	NotSig	Bacteria	Bacteroidetes	Bacteroidia	Bacteroidales	Prevotellaceae	Prevotella	0	0.001	0	0	0.004	0	0	0	0	0	0	0	0.003	0	0	0	0	0.002	0	0	0.002	0
OTU1622	0.448	5.622	0.711146	0.920153	NotSig	Bacteria	Firmicutes	Clostridia	Clostridiales	Ruminococcaceae	Unassigned	0	0	0	0	0	0.002	0.002	0	0	0	0	0	0	0.003	0	0	0	0	0	0	0	0
OTU32	-0.273	12.174	0.711688	0.920153	NotSig	Bacteria	Bacteroidetes	Bacteroidia	Bacteroidales	Prevotellaceae	Prevotella	0.432	0.512	0.923	0.322	0.366	0.562	0.69	0.774	0.03	0.304	0.072	0.278	2.318	0.115	0.435	0.62	0.396	0.541	0.014	0.499	0.148	0.034
OTU578	0.288	8.919	0.711765	0.920153	NotSig	Bacteria	Bacteroidetes	Bacteroidia	Bacteroidales	Prevotellaceae	Prevotella	0.051	0.041	0.165	0.068	0.144	0.009	0.036	0.015	0.032	0.01	0.025	0.002	0.123	0.066	0.045	0.026	0.074	0.009	0.009	0.004	0.051	0.002
OTU1684	-0.462	7.243	0.71261	0.920153	NotSig	Bacteria	Firmicutes	Clostridia	Clostridiales	Ruminococcaceae	Unassigned	0.008	0.011	0.005	0.002	0.004	0.052	0.002	0	0.011	0.002	0	0.002	0	0.035	0	0	0	0	0	0.002	0.075	0
OTU851	-0.448	6.848	0.712634	0.920153	NotSig	Bacteria	Firmicutes	Clostridia	Clostridiales	Unassigned	Unassigned	0.006	0.009	0	0.01	0	0	0.029	0	0.002	0	0.005	0.014	0	0.075	0	0.003	0.003	0	0	0.004	0.007	0
OTU1146	-0.255	9.796	0.71275	0.920153	NotSig	Bacteria	Firmicutes	Clostridia	Clostridiales	Lachnospiraceae	Unassigned	0.082	0.098	0.187	0.104	0.13	0.021	0.072	0.104	0.002	0.053	0.074	0.068	0.101	0.138	0.216	0.112	0.071	0.216	0.016	0.036	0.007	0.07
OTU126	0.577	8.03	0.713923	0.920959	NotSig	Bacteria	Proteobacteria	Deltaproteobacteria	Desulfovibrionales	Desulfovibrionaceae	Desulfovibrio	0.026	0.019	0	0	0	0.019	0.235	0	0	0	0.007	0	0.003	0	0.174	0	0.003	0.014	0	0	0	0
OTU120	-0.363	6.697	0.714428	0.920959	NotSig	Bacteria	Unassigned	Unassigned	Unassigned	Unassigned	Unassigned	0.005	0.007	0.002	0.002	0.002	0	0	0.03	0.004	0	0.007	0.004	0.005	0.017	0.008	0	0	0.034	0.002	0.004	0	0
OTU1452	0.341	6.232	0.717308	0.92399	NotSig	Bacteria	Firmicutes	Clostridia	Clostridiales	Ruminococcaceae	Unassigned	0.003	0.003	0.002	0	0.007	0	0.007	0	0.002	0.008	0.007	0	0.008	0.006	0.003	0	0.003	0	0.007	0	0	0
OTU529	0.417	5.618	0.723815	0.930306	NotSig	Bacteria	Bacteroidetes	Bacteroidia	Bacteroidales	Prevotellaceae	Prevotella	0	0	0	0	0	0	0	0.003	0	0.002	0	0	0	0	0.003	0	0	0	0	0	0	0
OTU860	-0.287	6.992	0.724469	0.930306	NotSig	Bacteria	Firmicutes	Clostridia	Clostridiales	Unassigned	Unassigned	0.007	0.008	0.019	0.002	0.013	0.012	0.002	0.008	0.008	0.004	0	0.006	0.011	0	0	0.01	0.014	0.005	0.033	0.006	0.002	0.002
OTU892	-0.396	6.281	0.724753	0.930306	NotSig	Bacteria	Firmicutes	Unassigned	Unassigned	Unassigned	Unassigned	0.003	0.004	0	0.005	0	0.012	0.002	0	0.002	0.002	0	0.004	0.003	0.035	0	0	0.003	0	0.002	0	0	0
OTU1658	0.415	5.619	0.725136	0.930306	NotSig	Bacteria	Firmicutes	Clostridia	Clostridiales	Ruminococcaceae	Unassigned	0	0	0	0	0	0	0.002	0	0	0	0.002	0	0	0.003	0	0	0	0	0	0	0	0
OTU624	0.26	9.578	0.725338	0.930306	NotSig	Bacteria	Bacteroidetes	Bacteroidia	Bacteroidales	Porphyromonadaceae	Unassigned	0.077	0.071	0.022	0.024	0.067	0.18	0.16	0.074	0.015	0.081	0.136	0.014	0.049	0.363	0.071	0.058	0.038	0.025	0.005	0.026	0.066	0.009
OTU1601	0.414	5.621	0.72591	0.930306	NotSig	Bacteria	Firmicutes	Clostridia	Clostridiales	Clostridiaceae_1	Clostridium_sensu_stricto	0	0	0	0	0.002	0	0	0	0	0.002	0	0	0	0	0	0.003	0	0	0	0	0	0
OTU786	-0.564	11.203	0.72619	0.930306	NotSig	Bacteria	Firmicutes	Clostridia	Clostridiales	Ruminococcaceae	Unassigned	0.204	0.224	0	1.426	0	0.002	0	0	0	0	0.002	0.61	0	0	0.003	0.818	0	0	0.007	1.356	0.053	0
OTU630	0.493	6.716	0.726469	0.930306	NotSig	Bacteria	Unassigned	Unassigned	Unassigned	Unassigned	Unassigned	0.007	0.005	0	0	0	0	0.005	0.038	0	0	0.03	0	0.005	0	0.005	0	0	0.007	0	0	0	0.032
OTU229	-0.362	5.76	0.72786	0.931405	NotSig	Bacteria	Unassigned	Unassigned	Unassigned	Unassigned	Unassigned	0.001	0.001	0	0	0.002	0.002	0	0	0.002	0	0	0	0	0.006	0.003	0	0	0	0	0	0	0.002
OTU95	0.329	8.489	0.729428	0.931741	NotSig	Bacteria	Spirochaetes	Spirochaetia	Spirochaetales	Spirochaetaceae	Treponema	0.034	0.026	0.033	0.005	0.092	0.068	0	0.068	0.039	0.01	0.02	0	0.005	0.012	0.058	0.005	0	0.009	0	0.006	0.102	0.064
OTU115	-0.389	9.356	0.729998	0.931741	NotSig	Bacteria	Firmicutes	Negativicutes	Selenomonadales	Veillonellaceae	Allisonella	0.054	0.073	0	0.002	0	0.061	0.066	0.178	0	0.106	0.131	0	0.011	0.009	0.066	0	0.142	0.37	0.049	0	0	0.084
OTU581	-0.389	6.071	0.73011	0.931741	NotSig	Bacteria	Bacteroidetes	Bacteroidia	Bacteroidales	Prevotellaceae	Prevotella	0.002	0.003	0	0.005	0.004	0	0.002	0	0	0.008	0	0	0	0.012	0.008	0	0	0	0	0.002	0.004	0
OTU1623	0.401	5.617	0.73027	0.931741	NotSig	Bacteria	Firmicutes	Clostridia	Clostridiales	Ruminococcaceae	Clostridium_IV	0	0	0.002	0.002	0	0	0	0	0	0	0	0	0	0.003	0	0	0	0	0	0	0	0
OTU91	-0.382	9.795	0.730787	0.931741	NotSig	Bacteria	Spirochaetes	Spirochaetia	Spirochaetales	Spirochaetaceae	Treponema	0.075	0.088	0.002	0.228	0.011	0.101	0.004	0	0	0.069	0.079	0.253	0	0.231	0	0.146	0	0.011	0	0.117	0.327	0.05
OTU589	0.296	8.394	0.731986	0.932075	NotSig	Bacteria	Bacteroidetes	Bacteroidia	Bacteroidales	Unassigned	Unassigned	0.033	0.028	0.022	0.128	0.099	0.012	0	0.005	0	0.03	0.022	0.016	0.03	0.144	0.013	0.026	0.008	0.02	0.002	0.016	0.02	0.002
OTU30	0.241	12.311	0.732116	0.932075	NotSig	Bacteria	Bacteroidetes	Bacteroidia	Bacteroidales	Prevotellaceae	Prevotella	0.592	0.463	0.744	0.126	0.2	0.295	0.133	0.794	0.081	2.988	0.305	0.257	0.854	0.081	1.369	0.405	0.448	0.286	0.154	0.463	0.219	0.352
OTU797	-0.31	6.974	0.736001	0.934588	NotSig	Bacteria	Firmicutes	Clostridia	Clostridiales	Ruminococcaceae	Unassigned	0.008	0.009	0.002	0.002	0	0	0	0.036	0.006	0.028	0.002	0	0	0.003	0.011	0.016	0.014	0.014	0.002	0.014	0.002	0.011
OTU505	-0.3	11.913	0.736511	0.934588	NotSig	Bacteria	Bacteroidetes	Bacteroidia	Bacteroidales	Prevotellaceae	Prevotella	0.357	0.462	0.136	0.208	0.13	0.23	0.07	1.743	0.028	0.29	0.706	0.024	1.349	0.179	1.488	0.008	0.03	1.305	0	0.034	0.088	0.141
OTU801	0.221	11.363	0.73663	0.934588	NotSig	Bacteria	Firmicutes	Clostridia	Clostridiales	Lachnospiraceae	Unassigned	0.292	0.228	0.789	0.317	0.344	0.044	0.106	0.195	0.477	0.351	0.139	0.161	0.117	0.228	0.28	0.11	0.443	0.032	0.486	0.137	0.21	0.234
OTU1724	-0.216	10.905	0.737023	0.934588	NotSig	Bacteria	Firmicutes	Clostridia	Clostridiales	Unassigned	Unassigned	0.187	0.19	0.521	0.167	0.108	0.047	0.342	0.19	0.043	0.225	0.047	0.181	0.074	0.153	0.098	0.311	0.301	0.219	0.105	0.289	0.265	0.086
OTU1430	0.258	6.874	0.737113	0.934588	NotSig	Bacteria	Firmicutes	Clostridia	Clostridiales	Ruminococcaceae	Unassigned	0.008	0.007	0.01	0.005	0.007	0	0.007	0.023	0.008	0.006	0	0.016	0.005	0.003	0.003	0.005	0.008	0.029	0.002	0	0.004	0.007
OTU777	0.39	5.628	0.737626	0.934588	NotSig	Bacteria	Actinobacteria	Actinobacteria	Actinomycetales	Microbacteriaceae	Unassigned	0	0	0	0	0	0.002	0	0	0	0.002	0	0	0	0	0	0	0	0	0.002	0	0	0
OTU1122	0.516	6.914	0.737832	0.934588	NotSig	Bacteria	Unassigned	Unassigned	Unassigned	Unassigned	Unassigned	0.009	0.005	0.024	0	0.061	0	0	0	0	0	0.002	0	0	0	0	0.016	0	0	0	0.014	0.022	0
OTU1160	-0.371	5.878	0.738446	0.934688	NotSig	Bacteria	Firmicutes	Clostridia	Clostridiales	Ruminococcaceae	Unassigned	0.001	0.001	0.002	0	0.004	0	0	0.003	0	0.002	0	0	0	0	0.008	0	0	0	0	0.004	0	0.002
OTU850	0.241	7.607	0.739894	0.935843	NotSig	Bacteria	Firmicutes	Clostridia	Clostridiales	Ruminococcaceae	Unassigned	0.017	0.014	0.019	0	0.007	0.002	0.016	0.023	0.006	0.071	0.012	0.016	0.041	0.009	0.018	0.013	0.014	0.014	0.009	0.012	0.002	0.007
OTU1612	0.378	5.626	0.741527	0.937054	NotSig	Bacteria	Firmicutes	Clostridia	Clostridiales	Lachnospiraceae	Clostridium_XlVa	0	0	0.002	0	0	0	0	0.003	0	0	0	0	0	0	0	0	0	0	0.002	0	0	0
OTU297	0.376	5.623	0.741924	0.937054	NotSig	Bacteria	Firmicutes	Bacilli	Lactobacillales	Lactobacillaceae	Lactobacillus	0	0	0	0.002	0	0	0	0	0	0	0	0.002	0	0	0	0	0	0	0	0	0.002	0
OTU633	0.346	9.921	0.743997	0.938388	NotSig	Bacteria	Bacteroidetes	Bacteroidia	Bacteroidales	Prevotellaceae	Unassigned	0.105	0.09	0.251	0.056	0.467	0	0.217	0	0.008	0.004	0.04	0.004	0.131	0.571	0	0.071	0.014	0	0.007	0.02	0.084	0.005
OTU983	0.314	5.972	0.744054	0.938388	NotSig	Bacteria	Firmicutes	Clostridia	Clostridiales	Unassigned	Unassigned	0.002	0.002	0.002	0	0	0.002	0.002	0.003	0.006	0.002	0	0.002	0	0.012	0	0.003	0	0	0	0.002	0	0
OTU939	-0.432	5.755	0.746239	0.940465	NotSig	Bacteria	Firmicutes	Clostridia	Clostridiales	Unassigned	Unassigned	0.001	0.001	0	0.005	0	0	0	0.003	0	0	0	0	0.005	0.006	0	0	0	0	0	0	0	0
OTU547	-0.261	11.23	0.748446	0.942567	NotSig	Bacteria	Bacteroidetes	Bacteroidia	Bacteroidales	Prevotellaceae	Prevotella	0.218	0.273	0.273	0.385	0.771	0.005	0.145	0.203	0.13	0.158	0.04	0.07	1.518	0.291	0.259	0.251	0.019	0.171	0.005	0.115	0.1	0.007
OTU1223	0.466	5.953	0.750654	0.944668	NotSig	Bacteria	Firmicutes	Clostridia	Clostridiales	Ruminococcaceae	Unassigned	0.002	0.001	0	0	0	0	0.013	0	0	0.002	0.005	0	0	0.003	0	0	0	0	0	0	0.009	0
OTU1515	0.318	6.058	0.75156	0.945127	NotSig	Bacteria	Firmicutes	Clostridia	Clostridiales	Ruminococcaceae	Unassigned	0.003	0.002	0.005	0.012	0.002	0	0	0	0.002	0.002	0.002	0	0.003	0	0.003	0	0.011	0	0	0.002	0	0
OTU958	0.325	6.058	0.753008	0.945412	NotSig	Bacteria	Firmicutes	Clostridia	Clostridiales	Unassigned	Unassigned	0.002	0.002	0	0.002	0.004	0	0.005	0	0	0.012	0	0	0.003	0	0	0.005	0	0	0.002	0.004	0.002	0
OTU622	0.255	10.811	0.753072	0.945412	NotSig	Bacteria	Unassigned	Unassigned	Unassigned	Unassigned	Unassigned	0.196	0.158	0.067	0.153	0.058	0	0.022	0.337	0.246	0.402	0.263	0.408	0.014	0.009	0.071	0.065	0.148	0.383	0.164	0.046	0.022	0.655
OTU275	-0.504	5.687	0.753409	0.945412	NotSig	Bacteria	Unassigned	Unassigned	Unassigned	Unassigned	Unassigned	0	0.001	0	0.005	0	0	0	0	0	0	0	0	0	0.009	0	0	0	0	0	0	0	0
OTU911	0.372	5.847	0.75476	0.946428	NotSig	Bacteria	Firmicutes	Clostridia	Clostridiales	Ruminococcaceae	Unassigned	0.001	0.001	0	0	0.002	0	0.007	0	0	0.002	0	0.002	0	0.009	0	0	0	0	0.002	0	0	0
OTU1393	-0.288	8.148	0.756676	0.946864	NotSig	Bacteria	Firmicutes	Clostridia	Clostridiales	Unassigned	Unassigned	0.022	0.027	0.029	0	0.034	0	0.018	0.003	0.004	0.012	0.114	0.008	0.106	0.009	0.026	0.008	0.014	0.063	0.016	0.026	0	0
OTU1606	0.47	5.705	0.756691	0.946864	NotSig	Bacteria	Firmicutes	Clostridia	Clostridiales	Ruminococcaceae	Clostridium_IV	0.001	0	0	0	0	0.007	0	0	0	0	0	0	0	0	0	0	0	0.002	0	0	0.002	0
OTU1132	-0.302	6.539	0.756733	0.946864	NotSig	Bacteria	Firmicutes	Clostridia	Clostridiales	Lachnospiraceae	Cellulosilyticum	0.004	0.005	0	0.015	0.002	0	0	0	0.009	0.006	0.002	0.008	0.005	0.006	0.005	0	0.003	0	0	0	0.015	0.016
OTU891	-0.278	6.262	0.758043	0.947722	NotSig	Bacteria	Firmicutes	Clostridia	Clostridiales	Ruminococcaceae	Unassigned	0.003	0.003	0.005	0.005	0.004	0	0.002	0	0.002	0	0.005	0.006	0.003	0.003	0	0	0	0.018	0	0.004	0	0.007
OTU1607	-0.297	6.512	0.758503	0.947722	NotSig	Bacteria	Firmicutes	Clostridia	Clostridiales	Lachnospiraceae	Unassigned	0.004	0.005	0.005	0	0.013	0	0.002	0	0.004	0.006	0	0.01	0.003	0	0.008	0	0.019	0.009	0.009	0.002	0	0
OTU1468	0.274	6.163	0.759619	0.948265	NotSig	Bacteria	Firmicutes	Clostridia	Clostridiales	Ruminococcaceae	Clostridium_IV	0.003	0.003	0.014	0.002	0.002	0.002	0	0.003	0	0.006	0	0.002	0.003	0.006	0.008	0	0	0.007	0	0	0	0.002
OTU64	-0.297	6.049	0.760022	0.948265	NotSig	Bacteria	Firmicutes	Unassigned	Unassigned	Unassigned	Unassigned	0.002	0.002	0.002	0	0	0.002	0.005	0	0	0.006	0.002	0	0.005	0	0	0	0	0.002	0	0.006	0.004	0.002
OTU1510	-0.446	6.488	0.761026	0.948283	NotSig	Bacteria	Firmicutes	Clostridia	Clostridiales	Ruminococcaceae	Unassigned	0.004	0.006	0	0.029	0	0	0.005	0	0	0	0	0.006	0	0.04	0.008	0	0	0	0	0	0.009	0
OTU1015	0.391	5.691	0.761297	0.948283	NotSig	Bacteria	Firmicutes	Clostridia	Clostridiales	Unassigned	Unassigned	0.001	0.001	0	0	0.002	0	0	0.005	0	0	0	0	0	0.003	0	0	0	0.002	0	0	0	0
OTU497	-0.394	6.267	0.761664	0.948283	NotSig	Bacteria	Bacteroidetes	Bacteroidia	Bacteroidales	Bacteroidaceae	Bacteroides	0.003	0.004	0	0.012	0.009	0	0	0	0.002	0	0	0.004	0	0.009	0.021	0.01	0	0	0	0	0	0
OTU1680	0.251	7.728	0.764219	0.950786	NotSig	Bacteria	Firmicutes	Clostridia	Clostridiales	Unassigned	Unassigned	0.019	0.014	0	0.015	0	0.012	0.009	0.005	0.026	0.101	0	0.02	0.011	0.012	0.005	0.01	0.005	0.011	0.012	0.02	0.04	0.011
OTU1448	-0.279	9.719	0.76673	0.952762	NotSig	Bacteria	Firmicutes	Clostridia	Clostridiales	Lachnospiraceae	Clostridium_XlVa	0.073	0.089	0.17	0.024	0.031	0	0.014	0.003	0.043	0.006	0	0.443	0.063	0.265	0.224	0.105	0.005	0.007	0.005	0.103	0.104	0.011
OTU699	-0.67	5.972	0.766897	0.952762	NotSig	Bacteria	Fibrobacteres	Fibrobacteria	Fibrobacterales	Fibrobacteraceae	Fibrobacter	0.001	0.002	0	0	0	0	0	0	0	0	0	0.012	0	0	0	0	0	0	0	0	0.018	0
OTU813	0.303	7.641	0.769735	0.955609	NotSig	Bacteria	Firmicutes	Clostridia	Clostridiales	Lachnospiraceae	Unassigned	0.017	0.015	0.022	0.002	0.02	0.014	0	0.005	0	0	0.107	0.004	0.041	0.081	0.005	0.013	0	0	0.002	0.006	0.002	0.002
OTU1466	-0.219	6.321	0.770801	0.956253	NotSig	Bacteria	Firmicutes	Clostridia	Clostridiales	Ruminococcaceae	Unassigned	0.003	0.004	0.002	0	0.002	0.002	0.007	0	0.002	0.004	0.007	0.004	0.005	0.009	0.005	0.003	0	0.005	0	0.004	0.007	0
OTU1009	0.402	5.782	0.775391	0.961265	NotSig	Bacteria	Firmicutes	Clostridia	Clostridiales	Ruminococcaceae	Unassigned	0.001	0.001	0	0	0	0	0.011	0	0	0	0	0	0	0	0	0.003	0	0	0	0.002	0	0.002
OTU457	-0.358	6.825	0.77734	0.962365	NotSig	Bacteria	Bacteroidetes	Bacteroidia	Bacteroidales	Prevotellaceae	Prevotella	0.006	0.008	0	0.007	0	0.007	0.009	0.023	0	0	0.015	0	0.066	0	0	0.003	0	0	0	0.002	0.009	0
OTU1687	0.243	6.665	0.777379	0.962365	NotSig	Bacteria	Firmicutes	Clostridia	Clostridiales	Unassigned	Unassigned	0.006	0.005	0.007	0	0.004	0	0.013	0.008	0.006	0.024	0	0.002	0	0.014	0	0	0.005	0.005	0.007	0.004	0.011	0.002
OTU1211	-0.325	6.146	0.778129	0.962612	NotSig	Bacteria	Firmicutes	Clostridia	Clostridiales	Lachnospiraceae	Unassigned	0.002	0.003	0.002	0.012	0	0	0	0	0	0	0.01	0	0.005	0	0.003	0	0.005	0.009	0	0	0	0.007
OTU1489	-0.316	6.088	0.780609	0.964996	NotSig	Bacteria	Firmicutes	Clostridia	Clostridiales	Ruminococcaceae	Unassigned	0.002	0.003	0	0	0	0.007	0.007	0.003	0	0	0	0.002	0.005	0.009	0	0.008	0	0	0	0	0.004	0
OTU475	-0.325	6.377	0.784596	0.96924	NotSig	Bacteria	Bacteroidetes	Bacteroidia	Bacteroidales	Rikenellaceae	Alistipes	0.003	0.005	0.007	0.002	0.011	0	0	0	0.004	0	0	0.008	0.035	0.003	0	0	0	0.002	0	0	0	0.005
OTU1709	-0.302	5.949	0.78596	0.970239	NotSig	Bacteria	Firmicutes	Clostridia	Clostridiales	Unassigned	Unassigned	0.001	0.002	0	0.002	0	0	0	0.003	0.002	0.008	0	0	0.003	0	0	0.008	0	0	0.002	0.004	0	0
OTU1096	-0.195	8.86	0.786742	0.970518	NotSig	Bacteria	Firmicutes	Unassigned	Unassigned	Unassigned	Unassigned	0.041	0.042	0.093	0.031	0.022	0.014	0.032	0.061	0.026	0.008	0.097	0.026	0.011	0.11	0	0.063	0.038	0.011	0.03	0.085	0.027	0.05
OTU700	-0.253	9.888	0.788148	0.971567	NotSig	Bacteria	Firmicutes	Clostridia	Clostridiales	Lachnospiraceae	Unassigned	0.085	0.102	0.017	0.005	0.022	0.007	0.178	0.378	0.034	0.039	0.173	0	0.082	0.003	0.121	0.047	0	0.469	0.002	0.069	0.009	0.215
OTU1518	-0.286	5.941	0.791021	0.973286	NotSig	Bacteria	Firmicutes	Clostridia	Clostridiales	Unassigned	Unassigned	0.001	0.002	0.002	0.002	0	0	0.005	0	0	0.002	0.002	0	0.008	0.006	0	0	0.005	0	0	0	0	0
OTU232	0.462	5.808	0.791209	0.973286	NotSig	Bacteria	Unassigned	Unassigned	Unassigned	Unassigned	Unassigned	0.001	0.001	0	0	0.011	0	0	0	0	0	0	0	0	0	0	0	0.005	0	0.002	0	0	0
OTU787	0.303	5.699	0.791212	0.973286	NotSig	Bacteria	Unassigned	Unassigned	Unassigned	Unassigned	Unassigned	0.001	0.001	0	0.002	0.002	0.002	0	0	0	0	0	0	0	0.003	0	0	0	0	0	0	0.002	0
OTU1273	-0.263	7.088	0.79285	0.974529	NotSig	Bacteria	Firmicutes	Clostridia	Clostridiales	Unassigned	Unassigned	0.008	0.009	0.002	0.005	0.011	0	0	0.003	0.034	0.02	0.002	0.002	0.003	0.017	0	0.024	0.005	0.011	0	0.032	0	0
OTU637	0.215	8.171	0.79359	0.974529	NotSig	Bacteria	Bacteroidetes	Unassigned	Unassigned	Unassigned	Unassigned	0.027	0.022	0.014	0.07	0.022	0.035	0.018	0.02	0	0.014	0.01	0.062	0.016	0.017	0.013	0.097	0.008	0	0.002	0.047	0.004	0.009
OTU1673	0.213	8.493	0.794002	0.974529	NotSig	Bacteria	Actinobacteria	Actinobacteria	Unassigned	Unassigned	Unassigned	0.034	0.027	0.033	0.012	0.074	0	0.05	0.015	0.047	0.043	0	0.06	0.025	0.023	0.013	0.06	0.03	0.002	0.026	0.077	0.004	0.005
OTU389	-0.23	11.187	0.794934	0.974529	NotSig	Bacteria	Bacteroidetes	Unassigned	Unassigned	Unassigned	Unassigned	0.206	0.269	0.227	0.005	1.067	0.098	0.181	0.046	0.023	0.335	0.072	0.006	0.035	0.732	1.454	0.052	0.019	0.05	0.012	0.047	0.263	0.027
OTU1695	0.165	7.058	0.79501	0.974529	NotSig	Bacteria	Firmicutes	Clostridia	Clostridiales	Unassigned	Unassigned	0.01	0.008	0.002	0.015	0.004	0.005	0.018	0.01	0.004	0.02	0.012	0.006	0.014	0.006	0.005	0.008	0.008	0.009	0.005	0.004	0.015	0.007
OTU1410	0.191	7.174	0.795973	0.975025	NotSig	Bacteria	Firmicutes	Clostridia	Clostridiales	Ruminococcaceae	Unassigned	0.011	0.009	0.007	0.034	0.002	0.012	0.007	0.003	0.013	0	0.022	0.008	0.005	0.012	0.008	0.013	0.008	0.005	0.007	0.01	0	0.023
OTU104	0.198	8.309	0.798651	0.977621	NotSig	Bacteria	Firmicutes	Erysipelotrichia	Erysipelotrichales	Erysipelotrichaceae	Turicibacter	0.03	0.024	0.062	0.015	0.025	0	0.007	0.01	0.073	0.067	0.002	0.036	0.044	0.04	0.005	0.018	0.008	0.005	0.007	0.036	0.044	0.032
OTU40	-0.177	10.928	0.800035	0.97863	NotSig	Bacteria	Bacteroidetes	Bacteroidia	Bacteroidales	Prevotellaceae	Prevotella	0.187	0.198	0.103	0.746	0.191	0.098	0.111	0.165	0.182	0.091	0.136	0.046	0.18	0.291	0.343	0.298	0.019	0.178	0.005	0.249	0.334	0.084
OTU1547	-0.332	5.939	0.800669	0.978715	NotSig	Bacteria	Firmicutes	Clostridia	Clostridiales	Ruminococcaceae	Unassigned	0.001	0.002	0	0	0	0	0.002	0	0.002	0	0.01	0	0	0	0	0	0.011	0.005	0.002	0	0	0
OTU935	0.232	6.276	0.801225	0.978715	NotSig	Bacteria	Firmicutes	Clostridia	Clostridiales	Unassigned	Unassigned	0.003	0.003	0	0.007	0.007	0	0.002	0	0.009	0.002	0.002	0.004	0.003	0.012	0	0.01	0	0.005	0	0.002	0	0
OTU817	0.208	8.47	0.803132	0.980359	NotSig	Bacteria	Firmicutes	Clostridia	Clostridiales	Unassigned	Unassigned	0.037	0.028	0.148	0.002	0.009	0	0.025	0.03	0.006	0.091	0.055	0.006	0.016	0.006	0.058	0.01	0.019	0.002	0.016	0.03	0.007	0.111
OTU1699	0.335	5.711	0.804493	0.980809	NotSig	Bacteria	Firmicutes	Clostridia	Clostridiales	Ruminococcaceae	Unassigned	0.001	0	0	0.002	0	0	0	0	0	0.006	0	0	0	0	0	0	0	0	0.005	0	0	0
OTU778	0.193	10.185	0.804893	0.980809	NotSig	Bacteria	Firmicutes	Unassigned	Unassigned	Unassigned	Unassigned	0.126	0.11	0.459	0.107	0.258	0.035	0.081	0.018	0.09	0.034	0.067	0.109	0.022	0.651	0.013	0.154	0.011	0.016	0.009	0.119	0.082	0.027
OTU1474	-0.179	8.049	0.805184	0.980809	NotSig	Bacteria	Firmicutes	Clostridia	Clostridiales	Lachnospiraceae	Blautia	0.021	0.023	0.005	0.012	0	0.023	0.022	0.036	0.013	0.024	0.052	0.022	0.025	0.014	0.021	0.003	0.038	0.023	0.044	0.004	0.009	0.048
OTU1532	0.427	5.819	0.805903	0.981002	NotSig	Bacteria	Firmicutes	Clostridia	Clostridiales	Ruminococcaceae	Unassigned	0.001	0.001	0	0	0	0	0	0	0	0.014	0	0	0	0	0.003	0	0	0.007	0	0	0	0
OTU825	-0.222	7.524	0.807085	0.981757	NotSig	Bacteria	Firmicutes	Clostridia	Clostridiales	Ruminococcaceae	Unassigned	0.014	0.015	0.053	0.036	0.002	0	0.004	0.013	0.006	0.002	0.017	0.01	0.03	0	0.024	0.003	0.066	0	0.014	0.006	0.007	0
OTU1078	0.17	9.238	0.811207	0.985733	NotSig	Bacteria	Unassigned	Unassigned	Unassigned	Unassigned	Unassigned	0.06	0.047	0.067	0.092	0.036	0.03	0.061	0.018	0.154	0.079	0.01	0.048	0.005	0.061	0.024	0.086	0.03	0.029	0.037	0.144	0.046	0.007
OTU1102	-0.176	8.222	0.811957	0.985733	NotSig	Bacteria	Firmicutes	Clostridia	Clostridiales	Ruminococcaceae	Oscillibacter	0.025	0.027	0.065	0.007	0.025	0.023	0.007	0.03	0.002	0.053	0.03	0.01	0.044	0.003	0.005	0.013	0.082	0.059	0.016	0.004	0.02	0.025
OTU771	0.32	6.481	0.812482	0.985733	NotSig	Bacteria	Actinobacteria	Actinobacteria	Actinomycetales	Dietziaceae	Dietzia	0.005	0.004	0	0	0	0	0.045	0.003	0	0.002	0	0	0.027	0	0	0.003	0	0	0.005	0.002	0	0.002
OTU54	0.247	8.831	0.812609	0.985733	NotSig	Bacteria	Spirochaetes	Spirochaetia	Spirochaetales	Spirochaetaceae	Treponema	0.045	0.039	0.05	0.022	0.038	0.047	0	0.005	0	0.018	0.097	0.169	0.224	0.023	0	0.021	0	0.054	0	0.006	0.06	0
OTU403	-0.271	9.635	0.814309	0.987064	NotSig	Bacteria	Bacteroidetes	Bacteroidia	Bacteroidales	Prevotellaceae	Prevotella	0.072	0.097	0	0.237	0.009	0	0.016	0.015	0.148	0.25	0	0.04	0.016	0.862	0	0.008	0.008	0.007	0	0	0.044	0.02
OTU59	-0.173	7.029	0.815361	0.987064	NotSig	Bacteria	Firmicutes	Unassigned	Unassigned	Unassigned	Unassigned	0.008	0.008	0.005	0.002	0.007	0.007	0.004	0	0.017	0.008	0.007	0.02	0.003	0.003	0.003	0.008	0.005	0.011	0.009	0.02	0.015	0.002
OTU388	-0.187	10.059	0.815401	0.987064	NotSig	Bacteria	Bacteroidetes	Bacteroidia	Bacteroidales	Prevotellaceae	Prevotella	0.098	0.119	0.165	0.082	0.058	0.18	0.084	0.223	0.013	0.008	0.159	0.008	0.101	0.012	0.327	0.042	0.06	0.579	0.007	0.016	0.011	0.034
OTU386	-0.247	8.798	0.815983	0.987086	NotSig	Bacteria	Bacteroidetes	Bacteroidia	Bacteroidales	Prevotellaceae	Unassigned	0.035	0.049	0.007	0.005	0.025	0.141	0.007	0.142	0.011	0	0.005	0.006	0.038	0.193	0.222	0	0	0.011	0	0.006	0.02	0
OTU223	-0.295	6.015	0.816548	0.987086	NotSig	Bacteria	Unassigned	Unassigned	Unassigned	Unassigned	Unassigned	0.002	0.002	0	0	0	0	0.011	0	0	0.004	0	0.002	0	0	0	0.003	0.005	0	0	0.002	0.009	0
OTU1138	-0.234	5.831	0.817329	0.987348	NotSig	Bacteria	Firmicutes	Clostridia	Clostridiales	Unassigned	Unassigned	0.001	0.001	0.002	0	0.002	0	0.005	0	0	0	0	0	0.003	0.003	0	0.003	0.003	0	0	0	0	0.002
OTU648	-0.348	6.547	0.818481	0.988056	NotSig	Bacteria	Bacteroidetes	Bacteroidia	Bacteroidales	Unassigned	Unassigned	0.004	0.005	0	0.005	0	0	0	0	0	0	0	0.036	0	0	0.003	0.031	0	0	0	0.012	0.004	0
OTU783	0.35	5.975	0.819238	0.988287	NotSig	Bacteria	Unassigned	Unassigned	Unassigned	Unassigned	Unassigned	0.002	0.002	0	0	0.002	0.009	0	0	0.006	0	0	0	0	0.014	0	0	0	0	0	0	0.002	0
OTU13	0.202	14.246	0.820847	0.989545	NotSig	Bacteria	Firmicutes	Bacilli	Lactobacillales	Lactobacillaceae	Lactobacillus	2.101	1.874	1.545	4.808	1.62	0.035	0.013	3.559	4.03	0.112	0.466	4.82	0.06	0.441	12.347	1.885	0.388	0.025	0.435	1.747	0.184	1.225
OTU256	0.259	5.757	0.82334	0.991683	NotSig	Bacteria	Unassigned	Unassigned	Unassigned	Unassigned	Unassigned	0.001	0.001	0	0.002	0	0.002	0	0.005	0	0	0	0	0.003	0.003	0	0	0	0.002	0	0	0	0
OTU714	0.192	12.929	0.824205	0.991683	NotSig	Bacteria	Firmicutes	Clostridia	Clostridiales	Unassigned	Unassigned	0.86	0.663	1.985	0.898	1.193	0.511	0.975	0.127	0.252	0.104	1.675	0.875	0.016	1.475	0.032	1.987	0.019	0.153	0.005	1.953	0.964	0.02
OTU465	0.348	6.048	0.824322	0.991683	NotSig	Bacteria	Bacteroidetes	Bacteroidia	Bacteroidales	Porphyromonadaceae	Unassigned	0.002	0.002	0	0	0	0	0.002	0.023	0	0	0	0	0.011	0	0	0	0	0	0	0.002	0	0.005
OTU1394	0.175	7.971	0.82592	0.992544	NotSig	Bacteria	Actinobacteria	Actinobacteria	Unassigned	Unassigned	Unassigned	0.023	0.017	0.019	0.007	0.007	0.021	0.074	0.02	0.008	0.053	0.015	0.002	0.003	0	0.003	0.034	0.011	0.009	0.026	0.051	0.007	0.025
OTU1538	0.393	5.842	0.826174	0.992544	NotSig	Bacteria	Proteobacteria	Alphaproteobacteria	Unassigned	Unassigned	Unassigned	0.001	0.001	0	0.007	0	0	0	0	0	0	0.007	0	0	0.012	0	0	0	0	0	0	0	0
OTU1705	0.251	5.908	0.828784	0.9945	NotSig	Bacteria	Firmicutes	Clostridia	Clostridiales	Unassigned	Unassigned	0.002	0.001	0	0	0	0	0	0	0.006	0	0.007	0.002	0	0	0	0.003	0	0.002	0	0.004	0.002	0
OTU954	0.23	5.682	0.829143	0.9945	NotSig	Bacteria	Firmicutes	Clostridia	Clostridiales	Ruminococcaceae	Clostridium_IV	0.001	0.001	0.002	0	0	0	0.002	0	0	0	0.002	0	0	0	0.003	0.003	0	0	0	0	0	0
OTU1324	0.262	5.691	0.829508	0.9945	NotSig	Bacteria	Firmicutes	Clostridia	Clostridiales	Unassigned	Unassigned	0.001	0.001	0	0.002	0	0	0	0	0.002	0	0.002	0	0.005	0	0	0	0	0	0	0	0	0
OTU421	0.211	7.978	0.831125	0.99545	NotSig	Bacteria	Bacteroidetes	Unassigned	Unassigned	Unassigned	Unassigned	0.021	0.021	0.019	0	0.025	0.084	0.034	0.015	0	0.014	0.022	0	0.033	0.061	0.084	0	0	0.011	0.005	0	0.009	0.009
OTU177	-0.282	5.976	0.831645	0.99545	NotSig	Bacteria	Unassigned	Unassigned	Unassigned	Unassigned	Unassigned	0.002	0.002	0	0.002	0	0	0	0.005	0.002	0	0	0.006	0	0	0	0.003	0	0.018	0	0	0	0
OTU1739	-0.146	11.389	0.832639	0.99545	NotSig	Archaea	Euryarchaeota	Methanobacteria	Methanobacteriales	Methanobacteriaceae	Methanobrevibacter	0.25	0.256	0.177	0.259	0.42	0.07	0.041	0.142	0.299	0.242	0.27	0.577	0.066	0.075	0.053	0.105	0.519	0.32	0.779	0.085	0.334	0.227
OTU893	0.185	6.017	0.832753	0.99545	NotSig	Bacteria	Firmicutes	Clostridia	Clostridiales	Ruminococcaceae	Unassigned	0.002	0.002	0.002	0.002	0	0.007	0.002	0	0	0	0.005	0.002	0.003	0	0.005	0.003	0	0.002	0	0.002	0.002	0
OTU504	0.299	5.757	0.833229	0.99545	NotSig	Bacteria	Bacteroidetes	Bacteroidia	Bacteroidales	Prevotellaceae	Prevotella	0.001	0.001	0	0	0	0	0	0.005	0	0	0.005	0	0	0	0	0.005	0	0.002	0	0	0	0
OTU1525	-0.193	5.915	0.833718	0.99545	NotSig	Bacteria	Firmicutes	Clostridia	Clostridiales	Ruminococcaceae	Clostridium_IV	0.001	0.001	0.002	0	0.002	0.002	0	0.003	0	0.002	0	0.002	0	0	0	0	0	0.002	0.005	0.002	0.004	0
OTU567	-0.296	5.934	0.83628	0.996786	NotSig	Bacteria	Bacteroidetes	Bacteroidia	Bacteroidales	Prevotellaceae	Prevotella	0.001	0.002	0	0.007	0.002	0	0	0.005	0	0	0	0	0.011	0	0.008	0	0	0	0	0	0	0
OTU1376	-0.164	8.815	0.836982	0.996786	NotSig	Bacteria	Firmicutes	Clostridia	Clostridiales	Lachnospiraceae	Unassigned	0.04	0.044	0.033	0.002	0.031	0.002	0.03	0.018	0.043	0.177	0.02	0.04	0.055	0.098	0.034	0.024	0.022	0	0.035	0.01	0.004	0.156
OTU1426	-0.162	7.314	0.837124	0.996786	NotSig	Bacteria	Firmicutes	Unassigned	Unassigned	Unassigned	Unassigned	0.011	0.01	0.017	0	0.004	0.021	0.013	0.02	0.006	0.006	0.017	0.004	0.003	0.006	0	0.024	0.003	0.009	0.009	0.034	0.015	0.002
OTU82	0.262	5.759	0.837629	0.996786	NotSig	Bacteria	Proteobacteria	Deltaproteobacteria	Desulfovibrionales	Desulfovibrionaceae	Bilophila	0.001	0.001	0	0	0.002	0.005	0.002	0	0	0	0	0	0	0.006	0	0	0	0	0	0	0	0.002
OTU1061	-0.239	6.367	0.837688	0.996786	NotSig	Bacteria	Unassigned	Unassigned	Unassigned	Unassigned	Unassigned	0.004	0.004	0	0.01	0.004	0	0.004	0.015	0	0	0.002	0	0	0	0	0.008	0.019	0	0.009	0.002	0	0
OTU153	-0.227	6.979	0.838343	0.996887	NotSig	Bacteria	Firmicutes	Negativicutes	Selenomonadales	Veillonellaceae	Megasphaera	0.008	0.009	0.005	0	0.002	0.012	0.002	0.041	0	0	0.015	0	0.003	0	0.011	0	0	0.059	0	0.002	0.002	0.016
OTU336	0.246	5.694	0.8394	0.997066	NotSig	Bacteria	Spirochaetes	Spirochaetia	Spirochaetales	Spirochaetaceae	Unassigned	0.001	0	0	0	0.004	0	0	0	0	0.002	0	0	0.003	0	0	0	0	0	0	0	0.002	0
OTU1193	0.157	7.657	0.839634	0.997066	NotSig	Bacteria	Firmicutes	Clostridia	Clostridiales	Lachnospiraceae	Unassigned	0.016	0.014	0.019	0.012	0	0.005	0.005	0.013	0.036	0.004	0.007	0.062	0.003	0.009	0.024	0.029	0.014	0.009	0.009	0.034	0.002	0.007
OTU1470	-0.181	6.31	0.842955	1	NotSig	Bacteria	Firmicutes	Clostridia	Clostridiales	Ruminococcaceae	Unassigned	0.003	0.003	0.002	0.007	0	0	0	0	0.004	0.006	0.005	0.008	0.003	0	0	0.005	0.003	0.005	0	0.01	0.007	0
OTU1025	0.361	5.834	0.844919	1	NotSig	Bacteria	Firmicutes	Clostridia	Clostridiales	Unassigned	Unassigned	0.001	0.001	0	0	0	0.009	0	0	0	0	0.002	0	0	0	0.011	0	0	0	0	0	0	0
OTU711	0.13	13.179	0.845321	1	NotSig	Bacteria	Firmicutes	Clostridia	Clostridiales	Ruminococcaceae	Unassigned	0.988	0.788	1.189	1.847	0.649	1.253	0.448	0.515	1.238	1.441	0.758	0.545	0.322	0.389	0.137	1.122	0.301	0.913	0.36	1.223	2.793	0.322
OTU294	-0.186	8.146	0.845508	1	NotSig	Bacteria	Firmicutes	Unassigned	Unassigned	Unassigned	Unassigned	0.023	0.023	0.005	0.107	0	0	0.002	0	0.034	0.018	0.04	0.03	0	0.04	0.003	0.005	0.036	0.002	0.073	0.008	0.042	0.025
OTU680	-0.214	7.532	0.846063	1	NotSig	Bacteria	Bacteroidetes	Bacteroidia	Bacteroidales	Porphyromonadaceae	Unassigned	0.013	0.017	0.005	0.031	0.011	0	0.014	0.028	0.038	0	0	0.002	0	0.081	0.061	0.008	0	0	0	0.01	0.007	0
OTU955	-0.269	5.849	0.846823	1	NotSig	Bacteria	Firmicutes	Clostridia	Clostridiales	Unassigned	Unassigned	0.001	0.001	0	0	0	0	0	0	0.008	0.002	0	0	0	0	0.003	0	0.005	0	0.005	0	0	0
OTU659	-0.22	5.888	0.847332	1	NotSig	Bacteria	Firmicutes	Erysipelotrichia	Erysipelotrichales	Erysipelotrichaceae	Unassigned	0.001	0.002	0	0	0	0	0.002	0	0.004	0.002	0	0.004	0	0.012	0	0	0	0	0.002	0	0	0.002
OTU779	0.132	7.768	0.84769	1	NotSig	Bacteria	Firmicutes	Clostridia	Clostridiales	Unassigned	Unassigned	0.018	0.016	0.005	0.017	0.009	0.012	0.007	0.051	0.028	0.022	0.005	0.026	0.011	0.014	0.026	0.008	0.033	0.016	0.035	0.006	0.002	0.011
OTU554	0.174	8.986	0.849086	1	NotSig	Bacteria	Bacteroidetes	Bacteroidia	Bacteroidales	Porphyromonadaceae	Unassigned	0.051	0.044	0.036	0.017	0.018	0	0.251	0.084	0.023	0.061	0.022	0	0.057	0.017	0.158	0.013	0.008	0	0.002	0.018	0.011	0.159
OTU1386	0.156	9.045	0.849521	1	NotSig	Bacteria	Firmicutes	Clostridia	Clostridiales	Clostridiaceae_1	Clostridium_sensu_stricto	0.054	0.043	0.026	0.012	0.007	0.052	0.014	0.015	0.002	0.311	0.077	0.026	0.033	0.006	0.008	0.013	0.033	0.029	0.126	0.01	0.011	0.159
OTU1542	-0.324	5.812	0.850075	1	NotSig	Bacteria	Firmicutes	Clostridia	Clostridiales	Lachnospiraceae	Unassigned	0.001	0.001	0	0	0	0	0.002	0.008	0	0	0	0	0	0	0.013	0	0	0	0	0	0	0
OTU267	-0.132	7.576	0.850481	1	NotSig	Bacteria	Firmicutes	Negativicutes	Selenomonadales	Acidaminococcaceae	Phascolarctobacterium	0.014	0.015	0.019	0.031	0.007	0.023	0.007	0.036	0.008	0.004	0.005	0.004	0.016	0.014	0.003	0.008	0.019	0.02	0.005	0.004	0.035	0.023
OTU1413	-0.157	7.061	0.85405	1	NotSig	Bacteria	Firmicutes	Clostridia	Clostridiales	Ruminococcaceae	Unassigned	0.008	0.008	0.007	0.01	0	0	0.007	0.003	0.017	0.004	0.005	0.03	0	0.006	0	0.008	0.005	0.009	0.005	0.01	0.035	0.005
OTU1148	0.205	5.745	0.854105	1	NotSig	Bacteria	Firmicutes	Clostridia	Clostridiales	Unassigned	Unassigned	0.001	0.001	0	0	0	0	0.002	0.003	0.002	0	0.002	0	0	0	0	0	0	0.005	0	0.002	0	0
OTU300	-0.161	6.164	0.857377	1	NotSig	Bacteria	Firmicutes	Negativicutes	Selenomonadales	Acidaminococcaceae	Phascolarctobacterium	0.003	0.003	0.002	0.007	0.002	0.002	0	0.008	0.002	0.002	0	0	0	0.006	0	0	0	0.002	0	0.002	0.009	0.007
OTU479	-0.18	5.965	0.857612	1	NotSig	Bacteria	Bacteroidetes	Bacteroidia	Bacteroidales	Bacteroidaceae	Bacteroides	0.002	0.002	0	0.002	0	0	0	0.008	0	0.002	0.002	0.002	0	0.006	0	0.005	0	0	0	0.004	0.002	0
OTU511	0.205	5.689	0.859154	1	NotSig	Bacteria	Bacteroidetes	Unassigned	Unassigned	Unassigned	Unassigned	0.001	0	0	0.005	0	0	0	0	0	0	0	0.002	0	0	0	0.003	0	0	0	0.002	0	0
OTU1485	0.15	6.733	0.859307	1	NotSig	Bacteria	Firmicutes	Clostridia	Clostridiales	Lachnospiraceae	Unassigned	0.007	0.006	0.036	0.002	0.009	0	0.002	0.005	0.002	0.008	0.005	0.002	0.005	0.003	0.003	0	0.011	0.005	0.012	0	0	0.018
OTU679	0.206	8.861	0.859395	1	NotSig	Bacteria	Bacteroidetes	Bacteroidia	Bacteroidales	Porphyromonadaceae	Unassigned	0.046	0.041	0	0	0	0	0.195	0.03	0.002	0.018	0.218	0	0.03	0.003	0.103	0.003	0	0.176	0	0.014	0.013	0.07
OTU1067	0.134	9.741	0.86012	1	NotSig	Bacteria	Firmicutes	Clostridia	Clostridiales	Ruminococcaceae	Unassigned	0.091	0.077	0.242	0.194	0.171	0.009	0.09	0.033	0.032	0.079	0.032	0.028	0.098	0.222	0.021	0.123	0.049	0.009	0.002	0.038	0.199	0.009
OTU204	-0.287	5.93	0.860765	1	NotSig	Bacteria	Unassigned	Unassigned	Unassigned	Unassigned	Unassigned	0.001	0.002	0	0	0	0	0	0.008	0	0	0	0.006	0	0	0	0	0	0	0	0.002	0	0.014
OTU1293	0.159	6.56	0.861268	1	NotSig	Bacteria	Firmicutes	Clostridia	Clostridiales	Lachnospiraceae	Clostridium_XlVa	0.006	0.005	0.022	0.005	0.007	0	0.007	0	0	0.004	0.01	0.002	0.003	0.009	0.021	0	0	0.002	0	0	0.007	0.007
OTU1565	-0.226	5.709	0.861494	1	NotSig	Bacteria	Firmicutes	Clostridia	Clostridiales	Ruminococcaceae	Unassigned	0.001	0.001	0	0	0	0	0.004	0	0	0	0	0.002	0	0.003	0	0.005	0	0	0	0	0	0
OTU116	0.137	8.051	0.862688	1	NotSig	Bacteria	Spirochaetes	Spirochaetia	Spirochaetales	Spirochaetaceae	Treponema	0.024	0.022	0.036	0.063	0.054	0.005	0.002	0	0.006	0.022	0.017	0.036	0.076	0.012	0.016	0.024	0.008	0.025	0	0.008	0.013	0.034
OTU1365	0.139	9.423	0.863041	1	NotSig	Bacteria	Firmicutes	Clostridia	Clostridiales	Ruminococcaceae	Unassigned	0.066	0.058	0.014	0.097	0.018	0.007	0.111	0.003	0.233	0.057	0.015	0.103	0.052	0.069	0.05	0.11	0.014	0	0.009	0.097	0.071	0.107
OTU1023	-0.227	5.647	0.864118	1	NotSig	Bacteria	Unassigned	Unassigned	Unassigned	Unassigned	Unassigned	0	0.001	0	0	0	0	0	0	0	0.004	0	0	0	0	0	0.005	0	0	0	0	0	0
OTU1621	-0.223	5.651	0.86681	1	NotSig	Bacteria	Firmicutes	Clostridia	Clostridiales	Ruminococcaceae	Clostridium_IV	0	0.001	0.002	0	0	0	0.002	0	0	0	0	0	0	0.003	0	0	0	0	0	0	0.002	0
OTU799	0.11	10.393	0.869107	1	NotSig	Bacteria	Firmicutes	Clostridia	Clostridiales	Ruminococcaceae	Unassigned	0.137	0.12	0.132	0.087	0.103	0.112	0.563	0.058	0.077	0.067	0.146	0.028	0.022	0.262	0.082	0.123	0.128	0.052	0.044	0.141	0.201	0.15
OTU561	-0.203	6.835	0.86934	1	NotSig	Bacteria	Bacteroidetes	Bacteroidia	Bacteroidales	Prevotellaceae	Prevotella	0.007	0.008	0.007	0.027	0.029	0	0	0	0	0	0.002	0	0.022	0.026	0.021	0.005	0	0	0	0	0.007	0
OTU1261	-0.138	8.533	0.870089	1	NotSig	Bacteria	Unassigned	Unassigned	Unassigned	Unassigned	Unassigned	0.031	0.032	0.01	0.029	0.029	0	0.097	0.008	0.045	0.018	0.077	0	0.005	0.023	0.021	0.005	0.044	0.011	0.101	0.002	0.049	0.054
OTU243	0.263	5.682	0.870824	1	NotSig	Bacteria	Unassigned	Unassigned	Unassigned	Unassigned	Unassigned	0.001	0	0	0	0	0	0	0	0	0	0	0.006	0	0	0	0	0	0	0	0	0	0.005
OTU698	-0.205	5.699	0.870992	1	NotSig	Bacteria	Actinobacteria	Actinobacteria	Actinomycetales	Corynebacteriaceae	Corynebacterium	0.001	0.001	0	0	0	0	0.002	0	0	0.004	0	0	0	0	0	0	0	0.002	0	0	0	0.005
OTU1697	0.187	6.085	0.871634	1	NotSig	Bacteria	Firmicutes	Clostridia	Clostridiales	Ruminococcaceae	Unassigned	0.002	0.002	0.012	0	0.004	0.002	0	0	0.002	0	0	0.004	0	0.003	0	0.01	0	0	0	0.006	0	0
OTU1180	-0.186	5.725	0.873539	1	NotSig	Bacteria	Firmicutes	Clostridia	Clostridiales	Unassigned	Unassigned	0.001	0.001	0.002	0	0	0.002	0	0	0	0.002	0	0	0	0.003	0	0	0	0	0	0	0.004	0
OTU761	-0.232	5.787	0.873818	1	NotSig	Bacteria	Unassigned	Unassigned	Unassigned	Unassigned	Unassigned	0.001	0.001	0	0.002	0	0	0	0	0	0	0	0.006	0	0	0	0.005	0	0	0	0.004	0	0
OTU929	-0.262	5.928	0.874352	1	NotSig	Bacteria	Firmicutes	Clostridia	Clostridiales	Ruminococcaceae	Unassigned	0.001	0.002	0	0.002	0	0	0.007	0	0	0	0	0.004	0	0.02	0	0	0	0	0	0	0	0
OTU1315	-0.17	7.161	0.874915	1	NotSig	Bacteria	Firmicutes	Clostridia	Clostridiales	Unassigned	Unassigned	0.01	0.01	0	0.015	0	0	0.013	0	0.002	0.041	0	0.026	0.003	0.003	0.042	0	0.003	0	0.005	0.002	0.002	0.045
OTU26	-0.166	12.246	0.87525	1	NotSig	Bacteria	Bacteroidetes	Bacteroidia	Bacteroidales	Prevotellaceae	Prevotella	0.478	0.563	0.026	0.068	0.045	0.119	0.344	2.093	0.006	0.851	1.222	0.006	0.513	0.009	0.203	0.039	0	4.556	0	0.047	0.024	0.238
OTU217	-0.205	5.799	0.875573	1	NotSig	Bacteria	Unassigned	Unassigned	Unassigned	Unassigned	Unassigned	0.001	0.001	0	0.002	0	0.002	0	0	0	0	0	0.004	0	0	0	0	0	0	0	0.002	0.007	0
OTU1246	0.174	6.816	0.876697	1	NotSig	Bacteria	Firmicutes	Clostridia	Clostridiales	Lachnospiraceae	Unassigned	0.008	0.006	0.045	0	0.022	0	0	0	0	0.006	0	0.004	0.003	0.017	0.003	0.005	0.003	0.009	0	0.02	0	0
OTU905	-0.175	5.788	0.877217	1	NotSig	Bacteria	Firmicutes	Clostridia	Clostridiales	Ruminococcaceae	Unassigned	0.001	0.001	0	0.002	0	0	0	0	0	0.002	0.005	0	0	0	0	0	0.003	0	0.002	0	0	0.005
OTU1455	-0.251	6.797	0.877998	1	NotSig	Bacteria	Proteobacteria	Unassigned	Unassigned	Unassigned	Unassigned	0.006	0.009	0.012	0.007	0.022	0	0	0	0	0	0	0.018	0	0.086	0	0	0	0	0	0	0	0
OTU337	0.246	5.754	0.879034	1	NotSig	Bacteria	Unassigned	Unassigned	Unassigned	Unassigned	Unassigned	0.001	0.001	0	0.005	0.004	0	0	0	0	0	0	0	0	0.009	0	0	0	0	0	0	0	0
OTU110	-0.141	8.495	0.879692	1	NotSig	Bacteria	Spirochaetes	Spirochaetia	Spirochaetales	Spirochaetaceae	Treponema	0.029	0.03	0.022	0.012	0.076	0.009	0.002	0.036	0.071	0.043	0	0.02	0.03	0.032	0.005	0.094	0	0	0	0.091	0.04	0.007
OTU380	-0.203	5.588	0.88184	1	NotSig	Bacteria	Actinobacteria	Actinobacteria	Actinomycetales	Actinomycetaceae	Actinomyces	0	0	0	0	0	0	0.002	0	0	0	0	0	0	0	0	0	0	0	0.002	0	0	0
OTU1686	0.152	7.403	0.882142	1	NotSig	Bacteria	Firmicutes	Clostridia	Clostridiales	Ruminococcaceae	Unassigned	0.013	0.013	0.022	0.007	0.049	0.026	0.002	0	0.004	0.002	0	0.014	0.016	0.086	0.008	0.013	0	0	0	0.006	0.002	0
OTU455	0.129	8.159	0.882184	1	NotSig	Bacteria	Bacteroidetes	Bacteroidia	Bacteroidales	Prevotellaceae	Prevotella	0.026	0.023	0.002	0.15	0.027	0.028	0.018	0.013	0.019	0.004	0.002	0	0.035	0.055	0.026	0.026	0.005	0.007	0	0.012	0.06	0.002
OTU634	0.148	9.64	0.882926	1	NotSig	Bacteria	Bacteroidetes	Bacteroidia	Bacteroidales	Prevotellaceae	Unassigned	0.085	0.065	0.053	0.426	0.103	0	0.065	0	0.008	0.002	0.042	0.147	0.014	0.078	0.04	0.141	0	0.005	0	0.063	0.294	0.016
OTU1029	-0.2	5.588	0.883137	1	NotSig	Bacteria	Firmicutes	Unassigned	Unassigned	Unassigned	Unassigned	0	0	0	0	0	0	0.002	0	0	0	0	0	0	0	0	0	0	0	0	0.002	0	0
OTU1188	-0.2	5.588	0.883137	1	NotSig	Bacteria	Firmicutes	Clostridia	Clostridiales	Unassigned	Unassigned	0	0	0	0	0	0	0.002	0	0	0	0	0	0	0	0	0	0	0	0	0.002	0	0
OTU1437	0.198	5.739	0.883699	1	NotSig	Bacteria	Firmicutes	Clostridia	Clostridiales	Lachnospiraceae	Unassigned	0.001	0.001	0	0	0	0	0	0	0	0.004	0.005	0	0	0	0	0	0	0.002	0	0	0	0.005
OTU988	-0.19	5.661	0.884904	1	NotSig	Bacteria	Firmicutes	Clostridia	Clostridiales	Lachnospiraceae	Clostridium_XlVb	0	0	0	0.005	0	0	0	0	0	0	0	0	0	0	0	0	0	0	0	0	0.004	0
OTU858	-0.119	6.616	0.885003	1	NotSig	Bacteria	Unassigned	Unassigned	Unassigned	Unassigned	Unassigned	0.005	0.005	0.005	0.017	0.002	0	0.009	0.008	0.004	0.002	0.002	0.004	0.003	0.006	0.003	0.008	0	0.002	0.002	0.022	0.002	0
OTU1640	-0.15	5.724	0.885123	1	NotSig	Bacteria	Firmicutes	Clostridia	Clostridiales	Lachnospiraceae	Unassigned	0.001	0.001	0	0	0	0.002	0	0	0	0.002	0	0.002	0	0	0	0	0.003	0.002	0.002	0	0	0
OTU1302	0.139	6.271	0.885305	1	NotSig	Bacteria	Firmicutes	Clostridia	Clostridiales	Unassigned	Unassigned	0.003	0.003	0	0	0	0	0.002	0.01	0.008	0.01	0	0.004	0.011	0	0.008	0	0	0.002	0.002	0.004	0	0.002
OTU861	-0.142	6.744	0.886067	1	NotSig	Bacteria	Firmicutes	Clostridia	Clostridiales	Ruminococcaceae	Unassigned	0.006	0.006	0.029	0	0	0	0.005	0.008	0	0.002	0.015	0.006	0.003	0	0.018	0.003	0.025	0	0.012	0	0.002	0.002
OTU1175	-0.145	5.716	0.887211	1	NotSig	Bacteria	Firmicutes	Clostridia	Clostridiales	Unassigned	Unassigned	0.001	0.001	0	0	0	0	0	0.003	0	0.002	0	0.002	0	0	0	0	0	0.002	0	0.002	0	0.002
OTU515	-0.188	5.587	0.88824	1	NotSig	Bacteria	Bacteroidetes	Bacteroidia	Bacteroidales	Prevotellaceae	Prevotella	0	0	0	0	0	0	0	0	0	0.002	0	0	0	0	0	0	0.003	0	0	0	0	0
OTU753	-0.095	11.155	0.892853	1	NotSig	Bacteria	Firmicutes	Clostridia	Clostridiales	Ruminococcaceae	Unassigned	0.223	0.23	0.069	0.213	0.018	0.183	0.545	0.081	0.088	0.501	0.292	0.243	0.216	0.784	0.013	0.322	0.194	0.054	0.103	0.247	0.283	0.088
OTU576	0.177	8.58	0.89366	1	NotSig	Bacteria	Bacteroidetes	Bacteroidia	Bacteroidales	Porphyromonadaceae	Unassigned	0.043	0.031	0.328	0	0.018	0	0	0	0.002	0.081	0	0	0.008	0.043	0.003	0	0.194	0	0.061	0	0.002	0.002
OTU1055	-0.085	9.92	0.8937	1	NotSig	Bacteria	Firmicutes	Clostridia	Clostridiales	Ruminococcaceae	Unassigned	0.09	0.091	0.079	0.056	0.094	0.061	0.136	0.03	0.122	0.177	0.05	0.099	0.104	0.205	0.037	0.078	0.101	0.029	0.035	0.125	0.155	0.045
OTU112	0.213	10.146	0.894001	1	NotSig	Bacteria	Unassigned	Unassigned	Unassigned	Unassigned	Unassigned	0.124	0.086	0.002	0	0.002	0	0	1.147	0	0	0.084	0	0	0.012	0	0.369	0	0.036	0	0.439	0	0
OTU11	-0.101	10.224	0.896033	1	NotSig	Bacteria	Firmicutes	Erysipelotrichia	Erysipelotrichales	Erysipelotrichaceae	Holdemanella	0.116	0.117	0.024	0.162	0.009	0.049	0.013	0.117	0.064	0.166	0.535	0.02	0.055	0.012	0.087	0.018	0.142	0.318	0.236	0.018	0.049	0.236
OTU19	0.108	10.239	0.896525	1	NotSig	Bacteria	Firmicutes	Erysipelotrichia	Erysipelotrichales	Erysipelotrichaceae	Unassigned	0.129	0.105	0.072	0.23	0.016	0.047	0.02	0.543	0.083	0.242	0.007	0.028	0.025	0.003	0.058	0.191	0.093	0.225	0.215	0.174	0	0.064
OTU1743	0.154	5.751	0.89745	1	NotSig	Archaea	Euryarchaeota	Thermoplasmata	Unassigned	Unassigned	Unassigned	0.001	0.001	0.002	0.005	0.002	0	0	0	0	0	0	0	0.005	0.003	0	0	0	0	0	0	0	0
OTU1079	0.134	6.789	0.899406	1	NotSig	Bacteria	Firmicutes	Clostridia	Clostridiales	Ruminococcaceae	Unassigned	0.007	0.006	0.005	0.029	0.004	0	0.002	0.003	0.004	0	0.02	0.006	0.005	0	0	0	0.033	0.002	0.019	0	0	0
OTU202	0.193	5.813	0.901143	1	NotSig	Bacteria	Firmicutes	Bacilli	Lactobacillales	Lactobacillaceae	Lactobacillus	0.001	0.001	0	0	0	0	0.002	0	0	0	0.01	0	0	0	0.003	0	0	0	0	0	0	0.007
OTU1112	-0.094	7.755	0.901254	1	NotSig	Bacteria	Firmicutes	Clostridia	Clostridiales	Ruminococcaceae	Unassigned	0.018	0.019	0.055	0.012	0.018	0	0.025	0.005	0.009	0.012	0.03	0.01	0.014	0.098	0.016	0.01	0.014	0.016	0	0.004	0.013	0.009
OTU1476	-0.136	6.331	0.901491	1	NotSig	Bacteria	Firmicutes	Clostridia	Clostridiales	Ruminococcaceae	Unassigned	0.004	0.004	0	0.029	0	0	0.004	0	0	0	0	0.004	0.003	0.006	0.003	0.005	0.003	0.018	0	0.002	0	0
OTU1347	0.116	9.8	0.901817	1	NotSig	Bacteria	Firmicutes	Clostridia	Clostridiales	Unassigned	Unassigned	0.092	0.075	0.024	0.017	0.007	0	0.039	0.195	0	0.059	0.572	0.006	0.008	0.009	0.058	0.01	0.131	0.047	0.304	0.014	0.022	0.145
OTU245	-0.162	5.724	0.90201	1	NotSig	Bacteria	Unassigned	Unassigned	Unassigned	Unassigned	Unassigned	0.001	0.001	0	0	0	0	0	0	0.006	0	0	0	0	0.003	0	0.003	0	0	0	0.002	0	0
OTU284	-0.154	5.656	0.902927	1	NotSig	Bacteria	Firmicutes	Bacilli	Lactobacillales	Streptococcaceae	Streptococcus	0	0.001	0	0	0	0	0	0	0	0	0	0.004	0.005	0	0	0	0	0	0	0	0	0
OTU886	0.125	6.067	0.903206	1	NotSig	Bacteria	Firmicutes	Clostridia	Clostridiales	Ruminococcaceae	Unassigned	0.002	0.002	0	0.002	0	0	0.009	0.008	0.002	0.002	0	0	0	0.003	0.005	0.005	0	0	0	0.006	0	0
OTU1042	-0.15	5.649	0.904212	1	NotSig	Bacteria	Firmicutes	Unassigned	Unassigned	Unassigned	Unassigned	0	0	0	0	0	0	0	0	0.002	0.002	0	0	0	0	0.003	0	0	0	0	0	0	0.002
OTU1154	0.153	5.94	0.904518	1	NotSig	Bacteria	Synergistetes	Synergistia	Synergistales	Synergistaceae	Pyramidobacter	0.002	0.002	0	0.002	0	0	0.013	0	0	0.002	0	0	0.005	0.009	0	0.003	0	0	0	0	0	0
OTU1203	0.094	7.2	0.905307	1	NotSig	Bacteria	Firmicutes	Clostridia	Clostridiales	Ruminococcaceae	Unassigned	0.01	0.009	0.002	0.015	0	0.002	0.013	0.008	0.032	0.016	0.002	0.014	0.005	0.023	0	0.016	0	0.007	0.007	0.018	0.007	0.011
OTU362	-0.146	5.662	0.906047	1	NotSig	Bacteria	Actinobacteria	Actinobacteria	Actinomycetales	Corynebacteriaceae	Corynebacterium	0	0	0	0	0	0.002	0	0	0	0.002	0	0	0	0	0	0.003	0	0	0	0.002	0	0
OTU498	0.187	5.693	0.907097	1	NotSig	Bacteria	Bacteroidetes	Bacteroidia	Bacteroidales	Porphyromonadaceae	Porphyromonas	0.001	0	0	0	0	0	0	0	0.006	0	0	0	0	0	0	0	0	0	0	0	0.004	0
OTU231	0.111	5.758	0.907609	1	NotSig	Bacteria	Proteobacteria	Betaproteobacteria	Unassigned	Unassigned	Unassigned	0.001	0.001	0	0	0	0.002	0.002	0	0	0.002	0.002	0	0	0	0	0.003	0	0	0.002	0.002	0	0
OTU750	-0.143	5.583	0.907636	1	NotSig	Bacteria	Actinobacteria	Actinobacteria	Actinomycetales	Actinomycetaceae	Trueperella	0	0	0	0	0	0	0	0	0	0.002	0	0	0	0.003	0	0	0	0	0	0	0	0
OTU1212	-0.144	7.455	0.908111	1	NotSig	Bacteria	Firmicutes	Clostridia	Clostridiales	Unassigned	Unassigned	0.013	0.011	0.002	0	0	0	0.011	0	0	0.022	0.094	0	0	0	0.003	0.031	0.003	0.011	0.002	0.061	0.002	0
OTU689	-0.139	5.583	0.909328	1	NotSig	Bacteria	Bacteroidetes	Bacteroidia	Bacteroidales	Porphyromonadaceae	Unassigned	0	0	0	0	0	0	0	0	0	0.002	0	0	0	0	0.003	0	0	0	0	0	0	0
OTU238	-0.137	5.9	0.911671	1	NotSig	Bacteria	Unassigned	Unassigned	Unassigned	Unassigned	Unassigned	0.001	0.002	0	0.002	0	0	0	0	0	0	0.005	0.006	0	0.009	0	0	0	0	0	0.002	0	0.005
OTU1441	0.083	7.098	0.913014	1	NotSig	Bacteria	Firmicutes	Clostridia	Clostridiales	Lachnospiraceae	Unassigned	0.01	0.009	0.017	0.005	0.007	0	0.018	0.005	0.004	0.018	0.022	0.004	0.005	0.009	0.005	0	0.014	0.007	0.023	0.004	0	0.018
OTU1639	-0.134	5.591	0.913538	1	NotSig	Bacteria	Firmicutes	Clostridia	Clostridiales	Lachnospiraceae	Unassigned	0	0	0	0	0	0	0	0	0	0	0	0.002	0	0	0	0	0	0	0	0	0.002	0
OTU1022	-0.131	5.592	0.914837	1	NotSig	Bacteria	Firmicutes	Clostridia	Clostridiales	Ruminococcaceae	Unassigned	0	0	0	0.002	0	0	0	0	0	0	0	0	0	0	0	0	0	0	0	0	0.002	0
OTU987	-0.243	5.977	0.915311	1	NotSig	Bacteria	Firmicutes	Clostridia	Clostridiales	Ruminococcaceae	Clostridium_IV	0.002	0.002	0.019	0	0	0	0	0	0	0	0	0	0	0	0	0	0	0	0	0	0.015	0
OTU672	-0.18	5.721	0.920095	1	NotSig	Bacteria	Bacteroidetes	Bacteroidia	Bacteroidales	Porphyromonadaceae	Unassigned	0.001	0.001	0	0.007	0	0	0	0	0	0	0	0	0.008	0	0	0	0	0	0	0	0	0
OTU1661	0.068	10.889	0.921039	1	NotSig	Bacteria	Firmicutes	Clostridia	Clostridiales	Lachnospiraceae	Clostridium_XlVa	0.196	0.193	0.175	0.189	0.117	0.012	0.224	0.2	0.122	0.29	0.211	0.424	0.098	0.986	0.034	0.058	0.175	0.086	0.133	0.071	0.084	0.202
OTU563	-0.114	5.585	0.921674	1	NotSig	Bacteria	Bacteroidetes	Bacteroidia	Bacteroidales	Prevotellaceae	Prevotella	0	0	0.002	0	0	0	0	0	0	0	0	0	0	0.003	0	0	0	0	0	0	0	0
OTU316	-0.117	5.653	0.921685	1	NotSig	Bacteria	Proteobacteria	Betaproteobacteria	Burkholderiales	Sutterellaceae	Parasutterella	0	0.001	0	0.005	0	0	0	0	0	0	0	0	0	0.006	0	0	0	0	0	0	0	0
OTU106	0.082	9.492	0.921726	1	NotSig	Bacteria	Unassigned	Unassigned	Unassigned	Unassigned	Unassigned	0.071	0.068	0.022	0.121	0.013	0.023	0	0.228	0.039	0.01	0.007	0.245	0.041	0.063	0.026	0.029	0.011	0.381	0.035	0.057	0.02	0.016
OTU93	0.094	7.497	0.922227	1	NotSig	Bacteria	Proteobacteria	Betaproteobacteria	Burkholderiales	Oxalobacteraceae	Unassigned	0.014	0.013	0.019	0	0.043	0.005	0.022	0.028	0	0.014	0.01	0.002	0.049	0.009	0	0	0.041	0.011	0.009	0	0.013	0
OTU359	0.116	5.685	0.922697	1	NotSig	Bacteria	Unassigned	Unassigned	Unassigned	Unassigned	Unassigned	0.001	0	0.007	0	0	0	0	0	0	0	0	0	0	0	0	0	0.003	0	0	0	0.002	0
OTU1469	-0.068	6.782	0.922954	1	NotSig	Bacteria	Firmicutes	Clostridia	Clostridiales	Lachnospiraceae	Unassigned	0.006	0.007	0.002	0.007	0.004	0	0.005	0	0.011	0.01	0.012	0.01	0.011	0.017	0.016	0.005	0.003	0.005	0.002	0.004	0.002	0.005
OTU34	-0.083	12.335	0.923447	1	NotSig	Bacteria	Bacteroidetes	Bacteroidia	Bacteroidales	Prevotellaceae	Prevotella	0.533	0.576	0.115	3.382	0.741	0.349	0.041	0.18	0.088	0.179	0.092	0.167	1.575	0.173	2.868	0.256	0.016	0.595	0.007	0.123	0.102	0.041
OTU752	-0.067	11.562	0.926496	1	NotSig	Bacteria	Actinobacteria	Actinobacteria	Coriobacteriales	Coriobacteriaceae	Unassigned	0.306	0.271	0.313	0.32	0.261	0.185	0.195	0.145	0.22	1.09	0.166	0.163	0.052	0.089	0.082	0.05	0.112	0.14	0.18	0.047	1.396	0.56
OTU24	-0.076	13.174	0.926918	1	NotSig	Bacteria	Bacteroidetes	Bacteroidia	Bacteroidales	Prevotellaceae	Prevotella	0.91	0.949	1.856	1.329	3.741	0.002	0.24	0.647	0.214	0.162	0.173	0.734	1.826	1.34	1.208	2.327	0.087	0.744	0.007	1.431	0.456	0.066
OTU1471	-0.069	6.959	0.927404	1	NotSig	Bacteria	Firmicutes	Clostridia	Clostridiales	Ruminococcaceae	Unassigned	0.008	0.007	0.012	0.005	0.007	0.002	0.002	0.005	0.011	0.008	0.025	0.002	0	0.003	0	0.01	0.014	0.005	0.005	0.016	0.013	0.007
OTU1425	0.076	7.373	0.928175	1	NotSig	Bacteria	Firmicutes	Clostridia	Clostridiales	Lachnospiraceae	Clostridium_XlVa	0.013	0.013	0.043	0.015	0.027	0.002	0.011	0	0.002	0.002	0.015	0.014	0.005	0.035	0.037	0.005	0.036	0.002	0.002	0.002	0.002	0
OTU390	0.068	11.765	0.928809	1	NotSig	Bacteria	Bacteroidetes	Bacteroidia	Bacteroidales	Porphyromonadaceae	Unassigned	0.383	0.324	0.615	0.327	0.445	0.026	0.036	0.332	0.002	1.622	0.235	0.189	0.24	0.055	0.762	0.544	0.175	0.349	0.049	0.588	0.201	0.272
OTU1748	-0.098	5.59	0.929442	1	NotSig	Bacteria	Firmicutes	Clostridia	Clostridiales	Ruminococcaceae	Unassigned	0	0	0	0	0	0	0	0	0.002	0	0	0	0.003	0	0	0	0	0	0	0	0	0
OTU666	-0.098	5.59	0.929442	1	NotSig	Bacteria	Bacteroidetes	Bacteroidia	Bacteroidales	Porphyromonadaceae	Unassigned	0	0	0	0	0	0	0	0	0.002	0	0	0	0.003	0	0	0	0	0	0	0	0	0
OTU410	0.093	9.568	0.92951	1	NotSig	Bacteria	Bacteroidetes	Bacteroidia	Bacteroidales	Prevotellaceae	Unassigned	0.065	0.069	0.002	0.002	0	0.557	0.004	0.061	0	0.008	0.017	0	0.003	0.017	0.042	0.094	0.082	0.291	0.044	0.095	0.007	0.011
OTU1663	-0.102	5.659	0.93011	1	NotSig	Bacteria	Firmicutes	Clostridia	Clostridiales	Lachnospiraceae	Unassigned	0	0.001	0	0	0	0	0	0.003	0	0	0	0.002	0	0	0	0.005	0	0	0	0	0	0
OTU333	0.094	6.057	0.93055	1	NotSig	Bacteria	Firmicutes	Unassigned	Unassigned	Unassigned	Unassigned	0.002	0.002	0	0.002	0.002	0	0.002	0.01	0.002	0.002	0	0.002	0.003	0	0.005	0	0	0.014	0	0	0	0
OTU56	0.059	7.933	0.931198	1	NotSig	Bacteria	Firmicutes	Unassigned	Unassigned	Unassigned	Unassigned	0.021	0.018	0.036	0.019	0.004	0.007	0.041	0.005	0.011	0.016	0.037	0.034	0.008	0.023	0.005	0.013	0.014	0.011	0.033	0.024	0.007	0.045
OTU94	0.07	8.016	0.931346	1	NotSig	Bacteria	Proteobacteria	Gammaproteobacteria	Enterobacteriales	Enterobacteriaceae	Escherichia/Shigella	0.022	0.021	0.026	0.044	0	0.054	0.004	0.03	0.011	0.026	0.017	0.012	0.076	0.029	0.018	0.037	0.003	0	0.002	0.032	0.007	0.005
OTU181	0.071	6.154	0.933372	1	NotSig	Bacteria	Firmicutes	Bacilli	Lactobacillales	Streptococcaceae	Streptococcus	0.003	0.002	0.002	0.002	0.002	0	0	0.005	0	0.002	0.005	0.008	0	0.003	0	0	0.005	0.007	0.002	0.004	0	0.002
OTU1220	-0.086	5.596	0.935327	1	NotSig	Bacteria	Candidatus_Saccharibacteria	Unassigned	Unassigned	Unassigned	Saccharibacteria_genera_incertae_sedis	0	0	0	0	0	0	0	0	0	0	0.002	0	0	0	0	0	0	0	0	0	0.002	0
OTU1732	-0.086	5.598	0.935333	1	NotSig	Bacteria	Firmicutes	Clostridia	Clostridiales	Ruminococcaceae	Unassigned	0	0	0	0	0.002	0	0	0	0	0	0	0	0	0	0	0	0	0	0	0.002	0	0
OTU583	-0.069	9.243	0.935532	1	NotSig	Bacteria	Bacteroidetes	Bacteroidia	Bacteroidales	Porphyromonadaceae	Unassigned	0.054	0.061	0.088	0.024	0.22	0.044	0.059	0.036	0.021	0.032	0	0.016	0.139	0.19	0.04	0.094	0.011	0.059	0	0.059	0.015	0
OTU545	-0.068	5.723	0.935648	1	NotSig	Bacteria	Bacteroidetes	Bacteroidia	Bacteroidales	Prevotellaceae	Prevotella	0.001	0.001	0.002	0	0.002	0.002	0	0	0	0	0	0	0.003	0	0.003	0	0	0.002	0	0	0	0
OTU967	0.069	9.282	0.935707	1	NotSig	Bacteria	Firmicutes	Clostridia	Clostridiales	Unassigned	Unassigned	0.059	0.052	0.022	0.041	0.038	0.005	0.02	0.005	0.032	0.091	0	0.338	0.003	0.061	0.008	0.029	0.079	0.007	0.138	0.046	0.031	0.12
OTU1069	-0.078	5.588	0.938167	1	NotSig	Bacteria	Firmicutes	Unassigned	Unassigned	Unassigned	Unassigned	0	0	0	0	0	0	0	0	0.002	0	0	0	0	0.003	0	0	0	0	0	0	0	0
OTU224	-0.075	5.597	0.939954	1	NotSig	Bacteria	Unassigned	Unassigned	Unassigned	Unassigned	Unassigned	0	0	0	0	0.002	0	0	0	0	0	0	0	0	0	0	0	0	0	0	0	0.002	0
OTU1118	-0.078	6.492	0.940685	1	NotSig	Bacteria	Firmicutes	Clostridia	Clostridiales	Unassigned	Unassigned	0.005	0.004	0.014	0.002	0.002	0.005	0	0.008	0	0.016	0	0	0	0.006	0	0	0	0.018	0.002	0.002	0.015	0
OTU478	-0.107	6.333	0.941332	1	NotSig	Bacteria	Bacteroidetes	Bacteroidia	Bacteroidales	Bacteroidaceae	Bacteroides	0.004	0.004	0	0.01	0	0	0	0	0	0.028	0	0	0	0.02	0.005	0	0.005	0	0	0	0	0.009
OTU73	-0.125	5.715	0.942365	1	NotSig	Bacteria	Unassigned	Unassigned	Unassigned	Unassigned	Unassigned	0.001	0.001	0	0	0	0	0	0	0	0	0	0.006	0	0	0	0	0	0	0	0	0	0.007
OTU150	0.077	8.442	0.942905	1	NotSig	Bacteria	Unassigned	Unassigned	Unassigned	Unassigned	Unassigned	0.032	0.032	0.026	0.01	0.004	0	0.124	0	0.004	0	0.146	0.008	0.008	0.063	0	0.008	0.003	0.212	0	0.014	0.007	0.007
OTU951	-0.069	5.978	0.943532	1	NotSig	Bacteria	Firmicutes	Clostridia	Clostridiales	Ruminococcaceae	Unassigned	0.002	0.002	0.002	0.002	0	0	0.002	0	0	0.004	0.007	0	0	0.003	0	0.003	0	0	0.005	0.002	0	0.005
OTU709	-0.107	8.02	0.943655	1	NotSig	Bacteria	Actinobacteria	Actinobacteria	Bifidobacteriales	Bifidobacteriaceae	Bifidobacterium	0.02	0.018	0.002	0.007	0	0.002	0	0	0	0	0.03	0.161	0	0	0	0	0	0.009	0.002	0	0.173	0
OTU434	-0.08	7.82	0.943722	1	NotSig	Bacteria	Bacteroidetes	Unassigned	Unassigned	Unassigned	Unassigned	0.017	0.018	0	0	0	0.002	0.016	0	0.034	0	0.012	0.103	0.022	0.012	0	0.105	0.005	0	0.002	0.032	0.002	0.002
OTU1382	0.071	8.662	0.943768	1	NotSig	Bacteria	Firmicutes	Clostridia	Clostridiales	Lachnospiraceae	Unassigned	0.039	0.037	0.026	0.119	0.016	0	0.16	0.03	0	0	0.04	0.004	0.123	0	0.116	0	0.019	0.047	0.009	0.002	0.002	0.054
OTU828	0.06	7.943	0.944408	1	NotSig	Bacteria	Firmicutes	Clostridia	Clostridiales	Ruminococcaceae	Unassigned	0.021	0.02	0.005	0.048	0	0	0.036	0.005	0.009	0.004	0.084	0.022	0.066	0.003	0.018	0.026	0.019	0.009	0.012	0.01	0	0.036
OTU1011	-0.063	5.593	0.945046	1	NotSig	Bacteria	Unassigned	Unassigned	Unassigned	Unassigned	Unassigned	0	0	0	0	0	0	0	0.003	0	0	0	0	0.003	0	0	0	0	0	0	0	0	0
OTU513	-0.104	5.801	0.945184	1	NotSig	Bacteria	Bacteroidetes	Bacteroidia	Bacteroidales	Prevotellaceae	Prevotella	0.001	0.001	0	0	0	0	0	0.008	0	0	0.002	0	0	0	0	0	0	0.011	0	0	0	0
OTU1126	-0.058	7.428	0.945207	1	NotSig	Bacteria	Firmicutes	Clostridia	Clostridiales	Ruminococcaceae	Oscillibacter	0.013	0.014	0.007	0.053	0.018	0.002	0.007	0.008	0.008	0.006	0.005	0.016	0.008	0.014	0.082	0.026	0.003	0.002	0	0	0.002	0.005
OTU1383	-0.046	9.803	0.945995	1	NotSig	Bacteria	Firmicutes	Clostridia	Clostridiales	Ruminococcaceae	Faecalibacterium	0.088	0.089	0.06	0.232	0.022	0.082	0.059	0.178	0.028	0.073	0.104	0.04	0.15	0.04	0.272	0.01	0.115	0.097	0.063	0.01	0.06	0.073
OTU1650	-0.061	5.601	0.946441	1	NotSig	Bacteria	Firmicutes	Clostridia	Clostridiales	Clostridiaceae_1	Clostridium_sensu_stricto	0	0	0	0	0	0.002	0	0	0	0	0	0	0	0	0	0	0	0	0.002	0	0	0
OTU748	0.048	14.175	0.946448	1	NotSig	Bacteria	Firmicutes	Clostridia	Clostridiales	Peptostreptococcaceae	Unassigned	1.898	1.647	1.284	1.38	0.714	0.049	1.23	1.119	4.725	4.742	0.558	3.174	1.502	0.847	0.496	1.851	0.437	0.593	1.099	1.999	4.614	3.032
OTU741	-0.051	12.416	0.948096	1	NotSig	Bacteria	Firmicutes	Clostridia	Clostridiales	Ruminococcaceae	Gemmiger	0.556	0.566	0.268	0.366	0.137	0.129	0.647	1.136	0.16	0.414	2.275	0.024	0.325	0.219	0.232	0.024	0.462	2.452	0.634	0.02	0.219	1.075
OTU1318	0.068	5.759	0.948134	1	NotSig	Bacteria	Firmicutes	Clostridia	Clostridiales	Unassigned	Unassigned	0.001	0.001	0	0.005	0	0	0	0	0.002	0	0	0.002	0	0	0	0	0	0	0	0.004	0.002	0
OTU814	-0.054	7.969	0.948727	1	NotSig	Bacteria	Firmicutes	Clostridia	Clostridiales	Unassigned	Unassigned	0.019	0.019	0.005	0.015	0	0.068	0.014	0.023	0.03	0.034	0	0.006	0.008	0	0.021	0.016	0.025	0.02	0.009	0.026	0.06	0.005
OTU949	-0.091	5.874	0.951996	1	NotSig	Bacteria	Firmicutes	Clostridia	Clostridiales	Ruminococcaceae	Unassigned	0.001	0.001	0.005	0	0	0	0	0	0	0	0	0.008	0	0	0	0.003	0	0	0	0.006	0.002	0
OTU1021	-0.047	5.599	0.952378	1	NotSig	Bacteria	Firmicutes	Clostridia	Clostridiales	Unassigned	Unassigned	0	0	0	0	0	0.002	0	0	0	0	0	0	0	0	0	0	0	0	0	0	0.002	0
OTU1412	-0.052	6.848	0.953061	1	NotSig	Bacteria	Firmicutes	Clostridia	Clostridiales	Ruminococcaceae	Clostridium_IV	0.007	0.007	0.005	0.002	0.004	0.014	0	0	0.009	0.002	0.015	0.014	0	0.003	0.026	0	0.003	0.023	0.012	0	0.002	0.005
OTU427	0.047	8.839	0.953357	1	NotSig	Bacteria	Bacteroidetes	Bacteroidia	Bacteroidales	Prevotellaceae	Prevotella	0.043	0.04	0.033	0.104	0.029	0	0.005	0.015	0.131	0.067	0.02	0.02	0.158	0.009	0.058	0.021	0.019	0.023	0	0.03	0.071	0.014
OTU588	-0.043	5.591	0.953783	1	NotSig	Bacteria	Bacteroidetes	Bacteroidia	Bacteroidales	Prevotellaceae	Prevotella	0	0	0	0	0	0	0	0.003	0	0	0	0	0	0.003	0	0	0	0	0	0	0	0
OTU973	-0.043	5.591	0.953783	1	NotSig	Bacteria	Firmicutes	Clostridia	Clostridiales	Ruminococcaceae	Unassigned	0	0	0	0	0	0	0	0.003	0	0	0	0	0	0.003	0	0	0	0	0	0	0	0
OTU1319	-0.068	5.874	0.954202	1	NotSig	Bacteria	Firmicutes	Clostridia	Clostridiales	Lachnospiraceae	Unassigned	0.001	0.001	0	0	0	0.002	0.002	0.003	0	0.006	0	0	0	0	0	0.003	0.003	0	0.005	0.002	0	0
OTU880	-0.049	6.484	0.954626	1	NotSig	Bacteria	Firmicutes	Clostridia	Clostridiales	Ruminococcaceae	Unassigned	0.005	0.005	0.01	0.012	0.002	0.002	0.004	0.015	0	0.002	0	0	0.014	0.009	0.011	0.003	0.008	0.002	0	0.002	0	0
OTU1519	-0.05	6.14	0.954869	1	NotSig	Bacteria	Firmicutes	Clostridia	Clostridiales	Ruminococcaceae	Unassigned	0.003	0.002	0.007	0.002	0	0	0.005	0.005	0	0.004	0	0.002	0	0.003	0.003	0.003	0	0.002	0.005	0.004	0.004	0
OTU426	0.054	8.125	0.955209	1	NotSig	Bacteria	Bacteroidetes	Bacteroidia	Bacteroidales	Bacteroidaceae	Bacteroides	0.024	0.026	0.022	0.007	0.092	0.012	0.013	0.053	0.004	0.026	0.007	0.002	0.003	0.205	0.021	0.01	0	0.002	0	0.006	0.015	0
OTU702	-0.039	5.591	0.95576	1	NotSig	Bacteria	Firmicutes	Clostridia	Clostridiales	Lachnospiraceae	Unassigned	0	0	0	0	0	0	0	0.003	0	0	0	0	0	0	0	0	0	0	0	0	0	0.002
OTU745	-0.04	9.508	0.9574	1	NotSig	Bacteria	Firmicutes	Clostridia	Clostridiales	Lachnospiraceae	Unassigned	0.07	0.07	0.012	0.022	0.004	0.014	0.075	0.041	0.073	0.195	0.253	0.008	0.055	0.02	0.055	0.016	0.104	0.205	0.049	0.018	0.024	0.156
OTU187	-0.068	6.383	0.959334	1	NotSig	Bacteria	Proteobacteria	Deltaproteobacteria	Desulfovibrionales	Desulfovibrionaceae	Desulfovibrio	0.003	0.004	0	0	0	0.028	0	0	0	0	0.005	0	0	0.023	0	0.003	0	0.007	0	0.004	0.004	0
OTU991	-0.031	5.583	0.959486	1	NotSig	Bacteria	Firmicutes	Clostridia	Clostridiales	Unassigned	Unassigned	0	0	0	0.002	0	0	0	0	0	0	0	0	0	0	0	0	0	0.002	0	0	0	0
OTU840	-0.065	7.099	0.960037	1	NotSig	Bacteria	Firmicutes	Clostridia	Clostridiales	Ruminococcaceae	Unassigned	0.008	0.008	0	0	0	0.009	0.005	0	0.058	0.002	0.005	0	0.005	0	0	0.008	0	0	0.002	0.002	0.062	0
OTU993	-0.04	5.662	0.961524	1	NotSig	Bacteria	Firmicutes	Unassigned	Unassigned	Unassigned	Unassigned	0	0.001	0	0	0	0.002	0	0	0.002	0	0	0	0	0.006	0	0	0	0	0	0	0	0
OTU627	0.045	9.261	0.961648	1	NotSig	Bacteria	Bacteroidetes	Bacteroidia	Bacteroidales	Unassigned	Unassigned	0.062	0.062	0.103	0.305	0.092	0.002	0.02	0.01	0.038	0.004	0.02	0.03	0.008	0.455	0.011	0.042	0.016	0	0.002	0.026	0.06	0
OTU933	0.04	5.999	0.962337	1	NotSig	Bacteria	Firmicutes	Clostridia	Clostridiales	Unassigned	Unassigned	0.002	0.002	0.002	0.002	0	0	0.005	0	0.002	0	0.002	0.004	0	0.003	0	0.005	0	0	0.002	0	0.007	0
OTU763	-0.022	5.597	0.963187	1	NotSig	Bacteria	Tenericutes	Mollicutes	Anaeroplasmatales	Anaeroplasmataceae	Anaeroplasma	0	0	0	0	0	0.002	0	0	0	0	0	0	0.003	0	0	0	0	0	0	0	0	0
OTU1285	0.033	7.291	0.963766	1	NotSig	Bacteria	Firmicutes	Clostridia	Clostridiales	Ruminococcaceae	Unassigned	0.012	0.011	0.012	0.01	0.022	0	0.014	0.013	0.008	0.016	0.015	0.006	0.027	0.014	0.003	0	0.005	0.025	0.002	0.004	0.022	0.007
OTU1652	0.041	5.81	0.965353	1	NotSig	Bacteria	Firmicutes	Clostridia	Clostridiales	Clostridiaceae_1	Clostridium_sensu_stricto	0.001	0.001	0	0.002	0	0	0	0	0.006	0.002	0	0	0	0.003	0.003	0	0	0	0.002	0	0.002	0
OTU1168	0.042	5.818	0.965463	1	NotSig	Bacteria	Firmicutes	Clostridia	Clostridiales	Unassigned	Unassigned	0.001	0.001	0.007	0	0.002	0	0	0	0	0	0.002	0	0	0.003	0	0	0.003	0	0	0.002	0.002	0
OTU847	-0.043	6.379	0.965644	1	NotSig	Bacteria	Firmicutes	Clostridia	Clostridiales	Ruminococcaceae	Unassigned	0.004	0.004	0.002	0	0	0	0.02	0.008	0	0.004	0.002	0.002	0.005	0.003	0.018	0	0.003	0.002	0	0	0	0.009
OTU1385	-0.033	8.84	0.966219	1	NotSig	Bacteria	Firmicutes	Clostridia	Clostridiales	Ruminococcaceae	Ruminococcus	0.046	0.04	0.084	0.237	0.029	0.002	0.005	0.015	0.008	0.026	0.025	0.024	0.027	0.032	0.047	0.003	0.079	0.011	0.077	0.004	0.035	0.088
OTU1259	-0.033	8.792	0.966837	1	NotSig	Bacteria	Firmicutes	Clostridia	Clostridiales	Unassigned	Unassigned	0.04	0.035	0.019	0.046	0.02	0	0.032	0.025	0.021	0.022	0.116	0.101	0.016	0.043	0.011	0.063	0.003	0.023	0.002	0.133	0.046	0.014
OTU1348	0.039	5.821	0.966929	1	NotSig	Bacteria	Unassigned	Unassigned	Unassigned	Unassigned	Unassigned	0.001	0.001	0.002	0.005	0.002	0	0	0	0.002	0	0	0	0	0.003	0	0	0	0	0.002	0.004	0	0
OTU767	0.052	5.803	0.967035	1	NotSig	Bacteria	Actinobacteria	Actinobacteria	Actinomycetales	Corynebacteriaceae	Corynebacterium	0.001	0.001	0	0	0.002	0	0.005	0	0	0	0.002	0	0	0	0	0	0	0	0	0	0.002	0.007
OTU134	0.055	6.982	0.967337	1	NotSig	Bacteria	Spirochaetes	Spirochaetia	Spirochaetales	Spirochaetaceae	Treponema	0.009	0.007	0.053	0	0.016	0	0	0	0	0	0.012	0.01	0	0	0	0.029	0	0	0	0.03	0.007	0.002
OTU41	-0.027	11.082	0.969165	1	NotSig	Bacteria	Bacteroidetes	Unassigned	Unassigned	Unassigned	Unassigned	0.207	0.229	0.139	0.07	0.186	0.536	0.142	0.446	0.043	0.081	0.382	0.046	0.385	0.354	0.327	0.139	0.036	0.782	0.037	0.109	0.088	0.036
OTU1233	-0.027	7.614	0.969636	1	NotSig	Bacteria	Firmicutes	Clostridia	Clostridiales	Ruminococcaceae	Butyricicoccus	0.015	0.015	0.033	0.017	0.027	0.016	0.005	0.008	0.002	0.002	0.02	0.022	0.019	0.026	0.016	0.037	0.022	0.005	0.005	0.01	0.015	0
OTU72	-0.05	5.93	0.970363	1	NotSig	Bacteria	Unassigned	Unassigned	Unassigned	Unassigned	Unassigned	0.002	0.001	0	0.005	0.004	0	0	0	0	0.004	0	0.002	0	0.006	0	0	0	0	0	0	0.009	0
OTU1291	0.033	7.782	0.970896	1	NotSig	Bacteria	Firmicutes	Clostridia	Clostridiales	Lachnospiraceae	Blautia	0.018	0.017	0	0	0	0.007	0.014	0.01	0.002	0.039	0.089	0.02	0.011	0.012	0	0.008	0.011	0.023	0.019	0.006	0.009	0.07
OTU930	0.037	5.812	0.971295	1	NotSig	Bacteria	Firmicutes	Clostridia	Clostridiales	Ruminococcaceae	Unassigned	0.001	0.001	0	0	0	0	0.004	0	0	0	0.005	0.002	0	0.006	0	0	0	0	0.002	0	0.002	0
OTU658	-0.04	7.52	0.973361	1	NotSig	Bacteria	Bacteroidetes	Bacteroidia	Bacteroidales	Porphyromonadaceae	Unassigned	0.014	0.016	0.019	0.053	0.011	0	0.011	0.003	0.028	0	0	0.016	0.003	0.144	0	0.005	0	0	0	0	0.011	0
OTU1436	-0.029	6.806	0.974152	1	NotSig	Bacteria	Firmicutes	Clostridia	Clostridiales	Ruminococcaceae	Unassigned	0.006	0.006	0	0.002	0.007	0	0.005	0.003	0.021	0.008	0.005	0.012	0.003	0.02	0.003	0.008	0	0	0	0.018	0.009	0.002
OTU1135	-0.032	6.507	0.975378	1	NotSig	Bacteria	Firmicutes	Clostridia	Clostridiales	Ruminococcaceae	Anaerofilum	0.004	0.004	0	0.01	0.002	0.002	0.014	0	0.006	0.002	0	0.008	0	0	0.003	0	0.008	0	0.012	0.004	0.013	0
OTU1027	-0.041	5.938	0.976352	1	NotSig	Bacteria	Firmicutes	Clostridia	Clostridiales	Ruminococcaceae	Unassigned	0.001	0.001	0	0	0.002	0.002	0.005	0	0	0	0.005	0	0	0.003	0	0	0	0	0	0	0.011	0
OTU910	-0.009	5.672	0.977978	1	NotSig	Bacteria	Firmicutes	Clostridia	Clostridiales	Ruminococcaceae	Ruminococcus	0	0.001	0	0	0	0.005	0	0	0	0	0	0	0.005	0	0	0	0	0	0	0	0	0
OTU926	0.025	6.137	0.979284	1	NotSig	Bacteria	Firmicutes	Clostridia	Clostridiales	Ruminococcaceae	Clostridium_III	0.003	0.003	0.002	0.005	0	0	0.005	0	0.004	0	0.005	0.004	0	0.012	0.003	0	0	0	0	0	0.004	0.007
OTU1213	0.014	5.587	0.980044	1	NotSig	Bacteria	Firmicutes	Clostridia	Clostridiales	Ruminococcaceae	Unassigned	0	0	0	0	0	0	0	0	0	0	0.002	0	0	0	0	0	0	0.002	0	0	0	0
OTU884	0.017	6.671	0.982466	1	NotSig	Bacteria	Firmicutes	Clostridia	Clostridiales	Lachnospiraceae	Unassigned	0.006	0.006	0	0.015	0.002	0.002	0.004	0.003	0.008	0.004	0.015	0.006	0	0.02	0.005	0.005	0.003	0	0.002	0.004	0.013	0.002
OTU1512	-0.034	6.641	0.98305	1	NotSig	Bacteria	Firmicutes	Clostridia	Clostridiales	Lachnospiraceae	Unassigned	0.006	0.007	0	0.01	0	0	0.002	0.008	0	0	0.037	0	0	0.066	0	0	0	0	0	0	0	0
OTU963	0.022	5.811	0.983106	1	NotSig	Bacteria	Firmicutes	Clostridia	Clostridiales	Unassigned	Unassigned	0.001	0.001	0.002	0.005	0	0	0	0	0	0	0	0.004	0	0	0	0.005	0	0	0	0	0.004	0
OTU441	-0.017	7.6	0.985086	1	NotSig	Bacteria	Bacteroidetes	Bacteroidia	Bacteroidales	Prevotellaceae	Prevotella	0.015	0.016	0.024	0.031	0.029	0	0	0.005	0.023	0.016	0.007	0.016	0.035	0.026	0.053	0.008	0.027	0	0	0.004	0.007	0
OTU936	0.02	5.993	0.98539	1	NotSig	Bacteria	Firmicutes	Clostridia	Clostridiales	Unassigned	Unassigned	0.002	0.002	0	0.002	0.002	0.005	0.004	0.003	0	0	0.002	0	0	0	0.003	0.003	0	0.002	0	0	0.009	0
OTU81	-0.027	5.862	0.986395	1	NotSig	Bacteria	Firmicutes	Clostridia	Unassigned	Unassigned	Unassigned	0.001	0.001	0.002	0.01	0	0	0.002	0	0	0	0	0	0	0.009	0	0	0.005	0	0	0	0	0
OTU383	-0.019	8.356	0.987419	1	NotSig	Bacteria	Bacteroidetes	Bacteroidia	Bacteroidales	Prevotellaceae	Prevotella	0.029	0.031	0.007	0.005	0	0.042	0.011	0.157	0	0	0.064	0	0.003	0.003	0.008	0.01	0	0.259	0	0.018	0.004	0
OTU1529	0.008	5.864	0.991057	1	NotSig	Bacteria	Firmicutes	Clostridia	Clostridiales	Ruminococcaceae	Unassigned	0.001	0.001	0.005	0.005	0	0	0	0	0.002	0	0	0.002	0.005	0.003	0.003	0	0.003	0	0	0	0	0
OTU1643	0.011	5.919	0.991533	1	NotSig	Bacteria	Firmicutes	Clostridia	Clostridiales	Lachnospiraceae	Unassigned	0.002	0.001	0.002	0	0	0	0.002	0	0	0.002	0.007	0.002	0.005	0	0.005	0	0	0.002	0	0.002	0	0
OTU1600	-0.011	8.68	0.992508	1	NotSig	Bacteria	Firmicutes	Clostridia	Clostridiales	Lachnospiraceae	Clostridium_XlVa	0.037	0.034	0.139	0.012	0.193	0	0.004	0.008	0.008	0.002	0	0.006	0	0.086	0	0.094	0	0.009	0.002	0.085	0.062	0
OTU170	-0.009	6.028	0.994493	1	NotSig	Bacteria	Unassigned	Unassigned	Unassigned	Unassigned	Unassigned	0.002	0.002	0	0	0	0	0	0	0.017	0	0	0	0	0	0.011	0.003	0	0.002	0.002	0.002	0	0
OTU1119	0.005	6.451	0.99597	1	NotSig	Bacteria	Firmicutes	Clostridia	Clostridiales	Ruminococcaceae	Oscillibacter	0.005	0.004	0.005	0.029	0.004	0	0.004	0.003	0	0.002	0	0	0.014	0.009	0.013	0	0	0	0	0	0.004	0.005
OTU151	0.006	6.318	0.997249	1	NotSig	Bacteria	Unassigned	Unassigned	Unassigned	Unassigned	Unassigned	0.003	0.003	0.012	0	0.004	0.009	0	0	0.006	0	0.002	0	0	0	0.003	0	0	0	0.005	0	0	0.025
OTU1495	0.005	5.91	0.997832	1	NotSig	Bacteria	Firmicutes	Clostridia	Clostridiales	Lachnospiraceae	Unassigned	0.002	0.001	0	0	0	0	0	0	0	0.008	0.007	0	0	0	0	0.003	0	0	0	0	0	0.011
OTU1062	0	5.519	1	1	NotSig	Bacteria	Firmicutes	Unassigned	Unassigned	Unassigned	Unassigned	0	0	0	0	0	0	0	0	0	0	0	0	0	0	0	0	0	0	0	0	0	0
OTU1064	0	5.519	1	1	NotSig	Bacteria	Firmicutes	Clostridia	Clostridiales	Lachnospiraceae	Unassigned	0	0	0	0	0	0	0	0	0	0	0	0	0	0	0	0	0	0	0	0	0	0
OTU1076	0	5.519	1	1	NotSig	Bacteria	Firmicutes	Clostridia	Clostridiales	Unassigned	Unassigned	0	0	0	0	0	0	0	0	0	0	0	0	0	0	0	0	0	0	0	0	0	0
OTU1139	0	5.519	1	1	NotSig	Bacteria	Firmicutes	Clostridia	Clostridiales	Eubacteriaceae	Eubacterium	0	0	0	0	0	0	0	0	0	0	0	0	0	0	0	0	0	0	0	0	0	0
OTU1190	0	5.519	1	1	NotSig	Bacteria	Firmicutes	Clostridia	Clostridiales	Unassigned	Unassigned	0	0	0	0	0	0	0	0	0	0	0	0	0	0	0	0	0	0	0	0	0	0
OTU1191	0	5.519	1	1	NotSig	Bacteria	Firmicutes	Clostridia	Clostridiales	Unassigned	Unassigned	0	0	0	0	0	0	0	0	0	0	0	0	0	0	0	0	0	0	0	0	0	0
OTU1222	0	5.519	1	1	NotSig	Bacteria	Firmicutes	Clostridia	Clostridiales	Ruminococcaceae	Unassigned	0	0	0	0	0	0	0	0	0	0	0	0	0	0	0	0	0	0	0	0	0	0
OTU1225	0	5.519	1	1	NotSig	Bacteria	Candidatus_Saccharibacteria	Unassigned	Unassigned	Unassigned	Saccharibacteria_genera_incertae_sedis	0	0	0	0	0	0	0	0	0	0	0	0	0	0	0	0	0	0	0	0	0	0
OTU1226	0	5.519	1	1	NotSig	Bacteria	Proteobacteria	Gammaproteobacteria	Aeromonadales	Succinivibrionaceae	Anaerobiospirillum	0	0	0	0	0	0	0	0	0	0	0	0	0	0	0	0	0	0	0	0	0	0
OTU1231	0	5.519	1	1	NotSig	Bacteria	Firmicutes	Clostridia	Clostridiales	Unassigned	Unassigned	0	0	0	0	0	0	0	0	0	0	0	0	0	0	0	0	0	0	0	0	0	0
OTU1296	0	5.519	1	1	NotSig	Bacteria	Firmicutes	Clostridia	Clostridiales	Unassigned	Unassigned	0	0	0	0	0	0	0	0	0	0	0	0	0	0	0	0	0	0	0	0	0	0
OTU1311	0	5.519	1	1	NotSig	Bacteria	Firmicutes	Clostridia	Clostridiales	Ruminococcaceae	Unassigned	0	0	0	0	0	0	0	0	0	0	0	0	0	0	0	0	0	0	0	0	0	0
OTU1330	0	5.519	1	1	NotSig	Bacteria	Firmicutes	Clostridia	Clostridiales	Ruminococcaceae	Unassigned	0	0	0	0	0	0	0	0	0	0	0	0	0	0	0	0	0	0	0	0	0	0
OTU1337	0	5.519	1	1	NotSig	Bacteria	Firmicutes	Clostridia	Clostridiales	Unassigned	Unassigned	0	0	0	0	0	0	0	0	0	0	0	0	0	0	0	0	0	0	0	0	0	0
OTU1342	0	5.519	1	1	NotSig	Bacteria	Firmicutes	Clostridia	Clostridiales	Unassigned	Unassigned	0	0	0	0	0	0	0	0	0	0	0	0	0	0	0	0	0	0	0	0	0	0
OTU1371	0	5.519	1	1	NotSig	Bacteria	Proteobacteria	Epsilonproteobacteria	Campylobacterales	Campylobacteraceae	Campylobacter	0	0	0	0	0	0	0	0	0	0	0	0	0	0	0	0	0	0	0	0	0	0
OTU1479	0	5.519	1	1	NotSig	Bacteria	Firmicutes	Clostridia	Clostridiales	Ruminococcaceae	Unassigned	0	0	0	0	0	0	0	0	0	0	0	0	0	0	0	0	0	0	0	0	0	0
OTU1521	0	5.519	1	1	NotSig	Bacteria	Firmicutes	Clostridia	Clostridiales	Lachnospiraceae	Unassigned	0	0	0	0	0	0	0	0	0	0	0	0	0	0	0	0	0	0	0	0	0	0
OTU1554	0	5.519	1	1	NotSig	Bacteria	Firmicutes	Clostridia	Clostridiales	Ruminococcaceae	Clostridium_IV	0	0	0	0	0	0	0	0	0	0	0	0	0	0	0	0	0	0	0	0	0	0
OTU1580	0	5.519	1	1	NotSig	Bacteria	Proteobacteria	Alphaproteobacteria	Unassigned	Unassigned	Unassigned	0	0	0	0	0	0	0	0	0	0	0	0	0	0	0	0	0	0	0	0	0	0
OTU1593	0	5.519	1	1	NotSig	Bacteria	Proteobacteria	Alphaproteobacteria	Unassigned	Unassigned	Unassigned	0	0	0	0	0	0	0	0	0	0	0	0	0	0	0	0	0	0	0	0	0	0
OTU1615	0	5.519	1	1	NotSig	Bacteria	Firmicutes	Clostridia	Clostridiales	Lachnospiraceae	Unassigned	0	0	0	0	0	0	0	0	0	0	0	0	0	0	0	0	0	0	0	0	0	0
OTU1642	0	5.519	1	1	NotSig	Bacteria	Firmicutes	Clostridia	Clostridiales	Ruminococcaceae	Unassigned	0	0	0	0	0	0	0	0	0	0	0	0	0	0	0	0	0	0	0	0	0	0
OTU1645	0	5.519	1	1	NotSig	Bacteria	Actinobacteria	Actinobacteria	Coriobacteriales	Coriobacteriaceae	Olsenella	0	0	0	0	0	0	0	0	0	0	0	0	0	0	0	0	0	0	0	0	0	0
OTU1649	0	5.519	1	1	NotSig	Bacteria	Firmicutes	Clostridia	Clostridiales	Ruminococcaceae	Unassigned	0	0	0	0	0	0	0	0	0	0	0	0	0	0	0	0	0	0	0	0	0	0
OTU1653	0	5.519	1	1	NotSig	Bacteria	Firmicutes	Clostridia	Clostridiales	Lachnospiraceae	Unassigned	0	0	0	0	0	0	0	0	0	0	0	0	0	0	0	0	0	0	0	0	0	0
OTU1657	0	5.519	1	1	NotSig	Bacteria	Firmicutes	Clostridia	Clostridiales	Unassigned	Unassigned	0	0	0	0	0	0	0	0	0	0	0	0	0	0	0	0	0	0	0	0	0	0
OTU1662	0	5.519	1	1	NotSig	Bacteria	Unassigned	Unassigned	Unassigned	Unassigned	Unassigned	0	0	0	0	0	0	0	0	0	0	0	0	0	0	0	0	0	0	0	0	0	0
OTU1666	0	5.519	1	1	NotSig	Bacteria	Firmicutes	Clostridia	Clostridiales	Lachnospiraceae	Clostridium_XlVa	0	0	0	0	0	0	0	0	0	0	0	0	0	0	0	0	0	0	0	0	0	0
OTU1678	0	5.519	1	1	NotSig	Bacteria	Firmicutes	Clostridia	Clostridiales	Ruminococcaceae	Unassigned	0	0	0	0	0	0	0	0	0	0	0	0	0	0	0	0	0	0	0	0	0	0
OTU1729	0	5.519	1	1	NotSig	Bacteria	Actinobacteria	Actinobacteria	Coriobacteriales	Coriobacteriaceae	Olsenella	0	0	0	0	0	0	0	0	0	0	0	0	0	0	0	0	0	0	0	0	0	0
OTU1731	0	5.519	1	1	NotSig	Bacteria	Firmicutes	Clostridia	Clostridiales	Ruminococcaceae	Unassigned	0	0	0	0	0	0	0	0	0	0	0	0	0	0	0	0	0	0	0	0	0	0
OTU1733	0	5.519	1	1	NotSig	Bacteria	Firmicutes	Clostridia	Clostridiales	Peptoniphilaceae	Peptoniphilus	0	0	0	0	0	0	0	0	0	0	0	0	0	0	0	0	0	0	0	0	0	0
OTU1735	0	5.519	1	1	NotSig	Bacteria	Firmicutes	Clostridia	Clostridiales	Clostridiales_Incertae_Sedis_XI	Finegoldia	0	0	0	0	0	0	0	0	0	0	0	0	0	0	0	0	0	0	0	0	0	0
OTU174	0	5.519	1	1	NotSig	Bacteria	Unassigned	Unassigned	Unassigned	Unassigned	Unassigned	0	0	0	0	0	0	0	0	0	0	0	0	0	0	0	0	0	0	0	0	0	0
OTU1741	0	5.519	1	1	NotSig	Archaea	Euryarchaeota	Methanobacteria	Methanobacteriales	Methanobacteriaceae	Methanobrevibacter	0	0	0	0	0	0	0	0	0	0	0	0	0	0	0	0	0	0	0	0	0	0
OTU1742	0	5.519	1	1	NotSig	Archaea	Euryarchaeota	Methanobacteria	Methanobacteriales	Methanobacteriaceae	Methanosphaera	0	0	0	0	0	0	0	0	0	0	0	0	0	0	0	0	0	0	0	0	0	0
OTU1745	0	5.519	1	1	NotSig	Bacteria	Firmicutes	Clostridia	Clostridiales	Clostridiaceae_1	Clostridium_sensu_stricto	0	0	0	0	0	0	0	0	0	0	0	0	0	0	0	0	0	0	0	0	0	0
OTU198	0	5.519	1	1	NotSig	Bacteria	Unassigned	Unassigned	Unassigned	Unassigned	Unassigned	0	0	0	0	0	0	0	0	0	0	0	0	0	0	0	0	0	0	0	0	0	0
OTU218	0	5.519	1	1	NotSig	Bacteria	Proteobacteria	Betaproteobacteria	Burkholderiales	Sutterellaceae	Sutterella	0	0	0	0	0	0	0	0	0	0	0	0	0	0	0	0	0	0	0	0	0	0
OTU240	0	5.519	1	1	NotSig	Bacteria	Unassigned	Unassigned	Unassigned	Unassigned	Unassigned	0	0	0	0	0	0	0	0	0	0	0	0	0	0	0	0	0	0	0	0	0	0
OTU241	0	5.519	1	1	NotSig	Bacteria	Firmicutes	Unassigned	Unassigned	Unassigned	Unassigned	0	0	0	0	0	0	0	0	0	0	0	0	0	0	0	0	0	0	0	0	0	0
OTU251	0	5.519	1	1	NotSig	Bacteria	Unassigned	Unassigned	Unassigned	Unassigned	Unassigned	0	0	0	0	0	0	0	0	0	0	0	0	0	0	0	0	0	0	0	0	0	0
OTU252	0	5.519	1	1	NotSig	Bacteria	Firmicutes	Unassigned	Unassigned	Unassigned	Unassigned	0	0	0	0	0	0	0	0	0	0	0	0	0	0	0	0	0	0	0	0	0	0
OTU259	0	5.519	1	1	NotSig	Bacteria	Unassigned	Unassigned	Unassigned	Unassigned	Unassigned	0	0	0	0	0	0	0	0	0	0	0	0	0	0	0	0	0	0	0	0	0	0
OTU299	0	5.519	1	1	NotSig	Bacteria	Unassigned	Unassigned	Unassigned	Unassigned	Unassigned	0	0	0	0	0	0	0	0	0	0	0	0	0	0	0	0	0	0	0	0	0	0
OTU301	0	5.519	1	1	NotSig	Bacteria	Unassigned	Unassigned	Unassigned	Unassigned	Unassigned	0	0	0	0	0	0	0	0	0	0	0	0	0	0	0	0	0	0	0	0	0	0
OTU304	0	5.519	1	1	NotSig	Bacteria	Firmicutes	Negativicutes	Selenomonadales	Acidaminococcaceae	Phascolarctobacterium	0	0	0	0	0	0	0	0	0	0	0	0	0	0	0	0	0	0	0	0	0	0
OTU305	0	5.519	1	1	NotSig	Bacteria	Unassigned	Unassigned	Unassigned	Unassigned	Unassigned	0	0	0	0	0	0	0	0	0	0	0	0	0	0	0	0	0	0	0	0	0	0
OTU311	0	5.519	1	1	NotSig	Bacteria	Firmicutes	Bacilli	Lactobacillales	Lactobacillaceae	Lactobacillus	0	0	0	0	0	0	0	0	0	0	0	0	0	0	0	0	0	0	0	0	0	0
OTU346	0	5.519	1	1	NotSig	Bacteria	Firmicutes	Erysipelotrichia	Erysipelotrichales	Erysipelotrichaceae	Unassigned	0	0	0	0	0	0	0	0	0	0	0	0	0	0	0	0	0	0	0	0	0	0
OTU354	0	5.519	1	1	NotSig	Bacteria	Firmicutes	Unassigned	Unassigned	Unassigned	Unassigned	0	0	0	0	0	0	0	0	0	0	0	0	0	0	0	0	0	0	0	0	0	0
OTU355	0	5.519	1	1	NotSig	Bacteria	Firmicutes	Unassigned	Unassigned	Unassigned	Unassigned	0	0	0	0	0	0	0	0	0	0	0	0	0	0	0	0	0	0	0	0	0	0
OTU357	0	5.519	1	1	NotSig	Bacteria	Tenericutes	Mollicutes	Unassigned	Unassigned	Unassigned	0	0	0	0	0	0	0	0	0	0	0	0	0	0	0	0	0	0	0	0	0	0
OTU379	0	5.519	1	1	NotSig	Bacteria	Bacteroidetes	Unassigned	Unassigned	Unassigned	Unassigned	0	0	0	0	0	0	0	0	0	0	0	0	0	0	0	0	0	0	0	0	0	0
OTU399	0	5.519	1	1	NotSig	Bacteria	Bacteroidetes	Bacteroidia	Bacteroidales	Prevotellaceae	Unassigned	0	0	0	0	0	0	0	0	0	0	0	0	0	0	0	0	0	0	0	0	0	0
OTU507	0	5.519	1	1	NotSig	Bacteria	Bacteroidetes	Bacteroidia	Bacteroidales	Porphyromonadaceae	Unassigned	0	0	0	0	0	0	0	0	0	0	0	0	0	0	0	0	0	0	0	0	0	0
OTU586	0	5.519	1	1	NotSig	Bacteria	Bacteroidetes	Bacteroidia	Bacteroidales	Prevotellaceae	Prevotella	0	0	0	0	0	0	0	0	0	0	0	0	0	0	0	0	0	0	0	0	0	0
OTU587	0	5.519	1	1	NotSig	Bacteria	Bacteroidetes	Bacteroidia	Bacteroidales	Prevotellaceae	Prevotella	0	0	0	0	0	0	0	0	0	0	0	0	0	0	0	0	0	0	0	0	0	0
OTU591	0	5.519	1	1	NotSig	Bacteria	Bacteroidetes	Bacteroidia	Bacteroidales	Prevotellaceae	Prevotella	0	0	0	0	0	0	0	0	0	0	0	0	0	0	0	0	0	0	0	0	0	0
OTU600	0	5.519	1	1	NotSig	Bacteria	Bacteroidetes	Bacteroidia	Bacteroidales	Prevotellaceae	Prevotella	0	0	0	0	0	0	0	0	0	0	0	0	0	0	0	0	0	0	0	0	0	0
OTU602	0	5.519	1	1	NotSig	Bacteria	Bacteroidetes	Bacteroidia	Bacteroidales	Prevotellaceae	Prevotella	0	0	0	0	0	0	0	0	0	0	0	0	0	0	0	0	0	0	0	0	0	0
OTU604	0	5.519	1	1	NotSig	Bacteria	Bacteroidetes	Bacteroidia	Bacteroidales	Prevotellaceae	Prevotella	0	0	0	0	0	0	0	0	0	0	0	0	0	0	0	0	0	0	0	0	0	0
OTU605	0	5.519	1	1	NotSig	Bacteria	Bacteroidetes	Bacteroidia	Bacteroidales	Prevotellaceae	Prevotella	0	0	0	0	0	0	0	0	0	0	0	0	0	0	0	0	0	0	0	0	0	0
OTU606	0	5.519	1	1	NotSig	Bacteria	Bacteroidetes	Bacteroidia	Bacteroidales	Prevotellaceae	Prevotella	0	0	0	0	0	0	0	0	0	0	0	0	0	0	0	0	0	0	0	0	0	0
OTU608	0	5.519	1	1	NotSig	Bacteria	Bacteroidetes	Bacteroidia	Bacteroidales	Bacteroidaceae	Bacteroides	0	0	0	0	0	0	0	0	0	0	0	0	0	0	0	0	0	0	0	0	0	0
OTU609	0	5.519	1	1	NotSig	Bacteria	Bacteroidetes	Bacteroidia	Bacteroidales	Prevotellaceae	Prevotella	0	0	0	0	0	0	0	0	0	0	0	0	0	0	0	0	0	0	0	0	0	0
OTU610	0	5.519	1	1	NotSig	Bacteria	Bacteroidetes	Bacteroidia	Bacteroidales	Porphyromonadaceae	Proteiniphilum	0	0	0	0	0	0	0	0	0	0	0	0	0	0	0	0	0	0	0	0	0	0
OTU611	0	5.519	1	1	NotSig	Bacteria	Bacteroidetes	Flavobacteriia	Flavobacteriales	Flavobacteriaceae	Unassigned	0	0	0	0	0	0	0	0	0	0	0	0	0	0	0	0	0	0	0	0	0	0
OTU612	0	5.519	1	1	NotSig	Bacteria	Bacteroidetes	Bacteroidia	Bacteroidales	Prevotellaceae	Prevotella	0	0	0	0	0	0	0	0	0	0	0	0	0	0	0	0	0	0	0	0	0	0
OTU613	0	5.519	1	1	NotSig	Bacteria	Bacteroidetes	Bacteroidia	Bacteroidales	Porphyromonadaceae	Unassigned	0	0	0	0	0	0	0	0	0	0	0	0	0	0	0	0	0	0	0	0	0	0
OTU614	0	5.519	1	1	NotSig	Bacteria	Bacteroidetes	Bacteroidia	Bacteroidales	Porphyromonadaceae	Porphyromonas	0	0	0	0	0	0	0	0	0	0	0	0	0	0	0	0	0	0	0	0	0	0
OTU652	0	5.519	1	1	NotSig	Bacteria	Bacteroidetes	Unassigned	Unassigned	Unassigned	Unassigned	0	0	0	0	0	0	0	0	0	0	0	0	0	0	0	0	0	0	0	0	0	0
OTU685	0	5.519	1	1	NotSig	Bacteria	Unassigned	Unassigned	Unassigned	Unassigned	Unassigned	0	0	0	0	0	0	0	0	0	0	0	0	0	0	0	0	0	0	0	0	0	0
OTU691	0	5.519	1	1	NotSig	Bacteria	Bacteroidetes	Bacteroidia	Bacteroidales	Porphyromonadaceae	Unassigned	0	0	0	0	0	0	0	0	0	0	0	0	0	0	0	0	0	0	0	0	0	0
OTU694	0	5.519	1	1	NotSig	Bacteria	Bacteroidetes	Bacteroidia	Bacteroidales	Porphyromonadaceae	Unassigned	0	0	0	0	0	0	0	0	0	0	0	0	0	0	0	0	0	0	0	0	0	0
OTU695	0	5.519	1	1	NotSig	Bacteria	Bacteroidetes	Unassigned	Unassigned	Unassigned	Unassigned	0	0	0	0	0	0	0	0	0	0	0	0	0	0	0	0	0	0	0	0	0	0
OTU706	0	5.519	1	1	NotSig	Bacteria	Planctomycetes	Planctomycetia	Planctomycetales	Planctomycetaceae	Aquisphaera	0	0	0	0	0	0	0	0	0	0	0	0	0	0	0	0	0	0	0	0	0	0
OTU729	0	5.519	1	1	NotSig	Bacteria	Actinobacteria	Actinobacteria	Bifidobacteriales	Bifidobacteriaceae	Bifidobacterium	0	0	0	0	0	0	0	0	0	0	0	0	0	0	0	0	0	0	0	0	0	0
OTU765	0	5.519	1	1	NotSig	Bacteria	Tenericutes	Mollicutes	Unassigned	Unassigned	Unassigned	0	0	0	0	0	0	0	0	0	0	0	0	0	0	0	0	0	0	0	0	0	0
OTU774	0	5.519	1	1	NotSig	Bacteria	Actinobacteria	Actinobacteria	Actinomycetales	Streptomycetaceae	Streptomyces	0	0	0	0	0	0	0	0	0	0	0	0	0	0	0	0	0	0	0	0	0	0
OTU790	0	5.519	1	1	NotSig	Bacteria	Firmicutes	Clostridia	Clostridiales	Unassigned	Unassigned	0	0	0	0	0	0	0	0	0	0	0	0	0	0	0	0	0	0	0	0	0	0
OTU794	0	5.519	1	1	NotSig	Bacteria	Actinobacteria	Actinobacteria	Coriobacteriales	Coriobacteriaceae	Unassigned	0	0	0	0	0	0	0	0	0	0	0	0	0	0	0	0	0	0	0	0	0	0
OTU887	0	5.519	1	1	NotSig	Bacteria	Firmicutes	Clostridia	Clostridiales	Lachnospiraceae	Unassigned	0	0	0	0	0	0	0	0	0	0	0	0	0	0	0	0	0	0	0	0	0	0
OTU909	0	5.519	1	1	NotSig	Bacteria	Firmicutes	Clostridia	Clostridiales	Ruminococcaceae	Clostridium_IV	0	0	0	0	0	0	0	0	0	0	0	0	0	0	0	0	0	0	0	0	0	0
OTU977	0	5.519	1	1	NotSig	Bacteria	Firmicutes	Clostridia	Clostridiales	Ruminococcaceae	Unassigned	0	0	0	0	0	0	0	0	0	0	0	0	0	0	0	0	0	0	0	0	0	0
OTU989	0	5.519	1	1	NotSig	Bacteria	Firmicutes	Clostridia	Clostridiales	Unassigned	Unassigned	0	0	0	0	0	0	0	0	0	0	0	0	0	0	0	0	0	0	0	0	0	0
OTU990	0	5.519	1	1	NotSig	Bacteria	Firmicutes	Clostridia	Clostridiales	Unassigned	Unassigned	0	0	0	0	0	0	0	0	0	0	0	0	0	0	0	0	0	0	0	0	0	0
