# Supplementary material for: Impact of Phellinus gilvus mycelia on growth, immunity and fecal microbiota in weaned piglets
Source: PeerJ. 2020 Apr 28;8:e9067. doi: 10.7717/peerj.9067 (PMC7194088; doi:10.7717/peerj.9067)
Supplement: File S8 [file peerj-08-9067-s008.xls]

## Sheet: Genus
	Group	C	C	C	C	C	C	C	C	C	C	ATB	ATB	ATB	ATB	ATB	ATB	ATB	ATB	ATB	ATB	SH	SH	SH	SH	SH	SH	SH	SH	SH	SH
abundance order of the sum	Genus	WK1	WK10	WK2	WK3	WK4	WK5	WK6	WK7	WK8	WK9	K1	K10	K2	K3	K4	K5	K6	K7	K8	K9	JS1	JS10	JS2	JS3	JS4	JS5	JS6	JS7	JS8	JS9	Sum of all samples
1	Unassigned	54.6	64.2	60.1	41.7	59.7	70.1	45.7	68	57.1	59.5	61.1	58.5	46.5	39.8	27.7	35.9	33.7	54.3	47	41.6	53.6	57.5	56.6	40.7	51.7	66.8	52.6	74.2	50.9	58	52.98
2	Prevotella	11.7	5.7	13.4	14.6	4.07	6.42	13.6	3	10.4	8.08	15.9	10.6	22.7	30.8	13.2	35.4	28.1	16.8	4.45	11.7	27.1	2.94	12.2	21.9	17.1	8.12	17.8	1.13	15.1	12.9	13.897
3	Clostridium_sensu_stricto	6.16	6.81	3.6	3.22	1.18	7.1	3.14	12.9	17	3	1.39	3.87	3.73	1.76	0.413	2.99	4.54	5.75	28.3	5.11	6.24	14.1	6.08	1.95	4.75	4.83	4.44	10.2	5.26	11.2	6.3671
4	Megasphaera	0.728	0.275	0.0701	0.548	3.59	2.55	15.2	0.00391	0.202	5.93	6.49	13.1	4.34	3.63	17.3	5.96	14.2	0.214	0.0544	25.4	0.175	4.23	0.0156	5.63	0.0312	0.0117	3.65	0.00389	0.0465	0.303	4.46274
5	Lactobacillus	2.52	12.6	6.5	2.77	0.0701	0.149	4.22	10.5	0.252	1.73	1.03	1.27	0.977	6.96	0.311	1.12	1.07	1.42	2.93	1.81	0.0974	3.84	0.94	17.1	2.7	0.845	0.463	1.67	2.79	2.66	3.11048
6	Treponema	4.3	2.06	1.19	12.2	8.59	0.376	1.45	1.19	2.24	1.21	1.84	2.74	0.471	0.712	0.167	0.346	0.727	0.686	5.33	0.86	1.4	0.899	1.71	0.549	12.2	0.0935	0.965	0.07	15.4	2.47	2.81472
7	Phascolarctobacterium	3.04	1.45	4.52	1.58	3.69	1.26	4.04	0.842	2.51	1.41	3.2	1.48	3.12	1.55	2.95	3.71	5.43	2.42	3.15	0.767	2.61	3.84	2.79	2.05	1.69	5.62	2.98	2.56	0.736	4.75	2.72483
8	Clostridium_XlVa	5.86	1.47	2.93	5.41	0.0662	1.24	1.33	0.36	0.95	0.627	1.34	1.69	1.48	2.78	0.214	1.48	1.52	6.79	1.18	0.825	1.12	2.41	5.51	1.52	4.34	6.1	1.09	3.93	4.16	2.37	2.40307
9	Ruminococcus	3.89	0.136	0.308	7.11	1.23	2.81	1.11	0.121	0.229	1.82	0.545	0.561	0.187	0.307	0.164	0.339	0.517	0.44	0.486	0.817	0.495	1.38	1.25	0.253	1.54	0.495	1.19	0.475	2.44	0.323	1.09893
10	Olsenella	0.0389	0.0659	0.358	0.0117	1.02	0.153	1.1	0.0431	0.345	1.95	0.627	0.42	2.75	0.0389	19.4	0.996	0.797	0.148	0.14	0.377	0.0312	0.128	0.0078	0.0818	0.0195	0.0779	0.914	0.105	0.031	0.198	1.07912
11	Gemmiger	0.549	0.171	0.432	0.229	0.136	0.928	1.43	0.18	0.671	2.55	0.872	0.783	2.27	0.16	0.366	2.62	1.53	1.82	0.983	1.44	0.347	1.65	0.542	0.315	0.0818	1.59	2.67	1.62	0.0349	0.264	0.97449
12	Selenomonas	0.311	0.031	0.00779	0.0467	0.0311	0.0509	1.07	0	0.244	0.136	0.00778	0.00779	0.265	5.28	11.9	1.53	1.56	0.21	0.00389	1.05	0.592	0.0701	0.0117	1.57	0.0039	0.0584	1.84	0.00389	0.0155	0.00389	0.930411
13	Desulfovibrio	0.572	0.143	0.463	0.412	1.68	1.71	1.93	0.0783	0.45	1.27	0.907	0.0623	1.63	0.245	0.588	0.58	0.393	0.0663	0.0427	0.44	0.538	0.109	2.69	0.347	0.534	0.171	1.2	0	0.275	0.397	0.66412
14	Oscillibacter	1.24	0.69	0.744	0.727	0.518	0.481	0.56	0.489	0.644	0.498	0.658	0.603	0.335	0.28	0.199	1.07	0.774	0.955	0.358	0.346	0.425	0.413	1.1	1.15	0.955	0.616	0.272	0.253	1.07	0.365	0.626267
15	Collinsella	0.0389	0.0543	0.257	0.0389	4.52	1.48	0.724	0.125	1.53	0.864	0.494	0.635	1.07	0.265	0.35	0.615	0.471	0.655	0.338	0.903	0.129	0.424	0.0039	0.0857	0.0429	0.187	0.704	0.3	0.0813	0.175	0.585363
16	Bacteroides	0.304	0.5	0.471	0.552	2.87	0.0352	0.222	0.317	0.566	0.0662	0.56	0.273	0.148	0.105	0.876	0.234	0.249	0.175	0.61	0.556	0.339	0.179	3.62	0.514	0.947	0.183	0.354	0.0311	0.441	0.237	0.55115
17	Clostridium_IV	0.467	0.337	1.21	0.144	0.576	0.466	0.156	0.579	0.264	2.09	0.401	0.401	0.23	0.459	0.436	0.872	0.424	1.24	1.26	0.374	0.109	0.175	0.328	0.448	0.0974	0.308	0.315	0.233	0.0929	0.327	0.493977
18	Succinivibrio	0.366	0.217	0.167	0.517	2.19	0.0939	0.296	0.0744	1.3	0.198	0.331	0.109	1.44	1.31	0.0545	0.397	0.117	0.39	0.0155	0.152	1.95	0.315	0.269	0.308	0.144	0.0506	0.0623	0.00389	0.0349	0.0272	0.430006
19	Streptococcus	0.844	0.334	0.167	0.0933	0.035	0.00783	0.125	0.0117	0.0504	0.693	0.0428	0.0623	0.642	1.42	0.0273	1.28	0.945	1.41	0.0738	0.502	0.23	1.15	0.0195	1.06	0.129	0.101	0.132	0.0934	0.0929	0.00777	0.392733
20	Catenibacterium	0.677	0.0271	0.393	0.342	2.29	0.0978	0.288	0.00783	0.225	1.67	0.14	0.397	0.21	0.0545	0.35	0.366	0.257	0.0351	0.396	0.607	0.0351	0.631	0.0039	0.0351	0.00779	0.0701	1.48	0.0662	0.0116	0.354	0.384171
21	Methanobrevibacter	0.202	0.574	0.261	0.463	0.101	0.043	0.14	0.309	0.248	0.269	0.362	0.206	0.265	0.0934	0.0156	0.101	0.0428	0.483	0.315	0.339	0.0662	0.226	0.0937	0.0662	0.105	0.53	0.327	0.794	0.0852	0.338	0.248803
22	Roseburia	0.253	0.031	0.136	0.0428	0.0467	0.294	0.354	0.00391	0.178	0.771	0.0389	0.0311	0.428	0.416	0.0934	0.0817	0.311	0.226	0.0389	0.482	0.238	0.237	0.0859	0.343	0	0.242	0.265	0.167	0.00775	0.0155	0.195285
23	Coprococcus	0.0545	0.0427	0.179	0.0544	0.0428	0.243	0.0934	0.0861	0.298	0.304	0.233	0.249	0.144	0.0817	0.00779	0.132	0.117	0.398	0.0544	0.226	0.0896	0.311	0.261	0.222	0.0312	0.405	0.459	0.272	0.0271	0.159	0.175923
24	Holdemanella	0.0233	0.0194	0.164	0.00778	0.0506	0.0117	0.117	0.0626	0.163	0.533	0.179	0.226	1.03	0.0156	0.276	0.269	0.214	0.164	0.152	0.377	0.0545	0.234	0.0117	0.0857	0.0195	0.14	0.315	0.237	0.0194	0.0466	0.173946
25	Blautia	0.035	0.0737	0.0506	0.00778	0.035	0.16	0.132	0.0274	0.163	0.327	0.0973	0.226	0.179	0.0895	0.0934	0.21	0.268	0.214	0.0505	0.405	0.105	0.455	0.0351	0.0779	0.0273	0.179	0.486	0.269	0.0232	0.0428	0.151483
26	Faecalibacterium	0.0584	0.0427	0.237	0.0272	0.0817	0.0704	0.179	0.0313	0.0737	0.109	0.175	0.179	0.335	0.202	0.0701	0.362	0.331	0.413	0.272	0.304	0.152	0.0817	0.0663	0.292	0.0117	0.117	0.0973	0.0623	0.0116	0.0583	0.150123
27	Lachnospiracea_incertae_sedis	0.121	0.0737	0.113	0.0895	0.0272	0.0783	0.28	0.0626	0.0504	0.0467	0.0506	0.0818	0.343	0.0272	0.28	0.0778	0.175	0.257	0.0972	0.0934	0.0818	0.261	0.0585	0.0428	0.0429	0.0818	0.607	0.0856	0.0542	0.117	0.1286
28	Acinetobacter	0	0	0.0467	3.59	0	0	0	0	0	0	0	0	0	0	0	0	0	0	0	0	0	0	0	0	0	0	0.00389	0	0	0	0.121353
29	Fibrobacter	0.0195	0.101	0.117	0.0389	0.109	0.0235	0.0467	0.0313	0.0853	0.0156	0.198	0.167	0.0467	0.167	0.0234	0.0117	0.0117	0.214	0.19	0.0584	0.195	0.00779	0.0859	0.144	0.179	0.00779	0.0506	0.00389	0.182	1.05	0.119389
30	Anaerovibrio	0.249	0.0271	0.206	0.0194	0.0195	0.0196	0.0156	0.0391	0.419	0.0389	0.00778	0.0273	0.0117	0.241	0.00389	0.0117	0.0233	0.818	0.00777	0.0661	0.136	0.175	0.117	0.257	0.0039	0.561	0.0117	0.0195	0	0.00389	0.118558
31	Dorea	0.0856	0.0853	0.0934	0.07	0.44	0.149	0.0739	0.0665	0.178	0.288	0.0934	0.109	0.074	0.0389	0.00779	0.117	0.0933	0.0741	0.109	0.0895	0.0312	0.0701	0.113	0.0467	0.0312	0.238	0.117	0.21	0.0232	0.07	0.109536
32	Parabacteroides	0.07	0.0465	0.171	0.14	0.288	0.0274	0.035	0.0157	0.112	0.175	0.105	0.0389	0.128	0.0545	0.0311	0.136	0.124	0.0195	0.0311	0.125	0.121	0.0117	0.542	0.164	0.0818	0.0351	0.0117	0.00389	0.0503	0.035	0.097673
33	Eubacterium	0.0272	0.00776	0.0234	0.0272	0	0.164	0.0506	0.0117	0.0775	0.0545	0.0195	0.0428	0.117	0.0156	0.164	0.0195	0.035	0.171	0.128	0.276	0.0312	0.105	0.297	0.0506	0.0779	0.0467	0.599	0.0973	0.178	0.00777	0.0974243
34	Alloprevotella	0.198	0.0233	0.0623	0.0272	0.00389	0.0196	0.0272	0.0235	0.0659	0.0778	0.0506	0.0311	0.00779	0.035	0.0117	0.035	0.0311	0.0039	0.0155	0.00389	0.53	0.035	0.308	0.0545	0.0468	0.405	0.163	0.132	0.0426	0.07	0.0847057
35	Butyricicoccus	0.0739	0.0776	0.125	0.0661	0.0234	0.0235	0.0467	0.0117	0.0581	0.14	0.0311	0.0389	0.0779	0.07	0.00779	0.0856	0.0739	0.113	0.0505	0.339	0.0818	0.136	0.0429	0.074	0.0779	0.171	0.132	0.136	0.0426	0.0622	0.083003
36	Allisonella	0	0	0.00389	0	0.0623	0.0665	0.179	0	0.105	0.132	0.0117	0.00779	0.222	0.00389	0.183	0.132	0.171	0.0234	0.00777	0.152	0.0117	0.0856	0.0078	0.0662	0	0.14	0.37	0.0506	0	0	0.0731713
37	Saccharibacteria_genera_incertae_sedis	0.0117	0.031	0.0273	0.0467	0.0272	0.0157	0.113	0.0431	0.0271	0.0817	0.0817	0.183	0.0779	0.00778	0.00779	0.0156	0.00778	0.0195	0.0311	0.0778	0.0195	0.261	0.0976	0.109	0.0195	0.0039	0.152	0.0545	0.0194	0.0233	0.0564717
38	Escherichia/Shigella	0.0272	0.0116	0.0428	0	0.0545	0.00391	0.0311	0.0117	0.0271	0.0156	0.00778	0.00389	0.514	0.0311	0.0273	0.00389	0.0156	0.0195	0.295	0.105	0.0779	0.00389	0.0273	0.0195	0.0351	0.0039	0	0.00389	0.031	0.00777	0.0486273
39	Turicibacter	0.0623	0.0349	0.0156	0.0233	0	0.00783	0.0117	0.0744	0.0659	0.00389	0.00778	0.0117	0.0195	0.00778	0.00389	0.0117	0.0272	0.0156	0.536	0.0311	0.0429	0.0311	0.039	0.00389	0.0195	0.00779	0.00389	0.00778	0.0349	0.0428	0.0401873
40	Mitsuokella	0	0.00776	0	0	0.144	0.0196	0	0	0	0.381	0	0	0	0.00389	0.568	0	0.00389	0	0	0.0156	0	0.0117	0	0	0	0	0.0156	0	0	0	0.0390347
41	Senegalimassilia	0.00389	0	0.0234	0.00389	0.0117	0.204	0.101	0	0	0.0506	0.00389	0.00389	0.0389	0.0156	0.105	0.0428	0.113	0.0195	0.00389	0.175	0.0156	0.105	0.0039	0.0117	0.0117	0	0.0156	0.00389	0.0271	0.0155	0.0376647
42	Akkermansia	0.0311	0.946	0.0467	0	0	0	0	0	0	0	0	0	0	0	0	0	0	0	0	0	0	0.00389	0	0	0.0039	0.0039	0	0.00389	0.00387	0	0.034775
43	Slackia	0.00778	0	0.00389	0.00389	0.00389	0.274	0.0117	0.00391	0.0388	0.132	0.00778	0.0195	0.0584	0.0156	0.0662	0.0467	0.0817	0.0585	0.00389	0.0311	0	0.0662	0	0	0	0.0039	0.0117	0.0156	0	0.00777	0.03248
44	Staphylococcus	0.0156	0.0892	0.0273	0	0	0.153	0.0272	0.00783	0.031	0.125	0.0272	0.0506	0.0584	0.00778	0.00389	0.00389	0.00389	0.0351	0.148	0.0233	0.0156	0.0662	0	0.0117	0.00779	0.0039	0.0195	0.00389	0	0	0.0322253
45	Campylobacter	0	0.0194	0.00389	0.00389	0	0.0196	0	0	0.0116	0	0	0.00389	0	0	0	0	0	0	0.00389	0.00389	0.0039	0	0.866	0	0.00779	0	0	0	0.00387	0.00389	0.03185
46	Clostridium_XVIII	0	0	0	0	0	0.0352	0.00389	0.0352	0.0116	0	0.0856	0.257	0.144	0.00389	0	0.00778	0.0117	0.0507	0.0194	0.0389	0.0039	0.199	0	0.00389	0	0.0156	0.00778	0.0195	0	0	0.0318177
47	Pseudoramibacter	0.00389	0.00388	0	0.00389	0	0	0	0	0	0.0117	0.00389	0.00779	0.428	0.253	0.0779	0	0.00389	0.0039	0.00389	0.0856	0.00779	0	0	0.0156	0	0	0.0117	0	0.00387	0	0.031006
48	Kurthia	0	0	0.0895	0.813	0	0	0	0	0	0	0	0	0	0	0	0	0	0	0	0	0	0	0	0	0	0	0	0	0	0	0.0300833
49	Comamonas	0	0	0.00389	0.852	0	0	0	0	0	0	0	0	0	0	0	0	0	0	0	0	0	0	0	0	0	0	0	0	0	0	0.0285297
50	Parasutterella	0.00389	0	0.00779	0.00389	0.00778	0.00783	0.00778	0	0	0.00389	0.0311	0	0.358	0.0662	0.0195	0.0389	0.00778	0	0	0.00389	0.0273	0.00389	0.0039	0.0428	0.0117	0	0.125	0	0.00775	0.00389	0.0264817
51	Butyricimonas	0.00389	0.0155	0.00779	0.00778	0.156	0	0	0	0.00388	0.00389	0	0	0.00389	0.00389	0.0156	0.00389	0.00778	0	0.00389	0.00389	0	0	0.398	0.00779	0.00779	0	0.0117	0	0	0.00389	0.0223577
52	Peptococcus	0.0117	0.00776	0.0117	0.00389	0.00389	0.00783	0.0195	0.00783	0.0426	0.0311	0.00778	0.00779	0.0701	0.0156	0.00389	0.0117	0.00778	0.0156	0.0972	0.0233	0.0039	0.0117	0.0273	0.00779	0.0117	0.039	0.0156	0.07	0.0116	0.00777	0.0204967
53	Acidaminococcus	0	0	0.00389	0	0.0545	0	0.0117	0	0	0.0117	0.00389	0	0.00389	0.00389	0.444	0.0117	0.00778	0	0	0.0233	0.0039	0.00389	0	0	0	0	0	0	0	0.00389	0.0197307
54	Corynebacterium	0.00778	0.00776	0.0195	0.0933	0.00778	0.0861	0.00389	0.00391	0.0233	0.0156	0.00389	0.0234	0.00779	0.00389	0	0.00389	0.00778	0.00779	0.0389	0.0117	0.0701	0.035	0	0.00779	0.0156	0.0039	0.00778	0.00778	0.0232	0.00389	0.018433
55	Streptophyta	0.0156	0.0271	0.0389	0.00389	0	0	0.0195	0.047	0.0155	0.00389	0.00778	0.0311	0.00389	0.0117	0.00389	0.0117	0.0156	0.0117	0.00389	0.0117	0.0039	0.0311	0.0078	0.00779	0.00779	0.0351	0.0156	0.0545	0.0349	0	0.0160937
56	Bifidobacterium	0.00389	0.159	0.00779	0	0.00389	0	0	0	0	0.0311	0.00389	0	0.00389	0	0.00389	0.00389	0	0.0039	0.00389	0	0	0	0	0	0	0	0.00778	0.00389	0	0.171	0.013723
57	Empedobacter	0	0	0.00779	0.401	0	0	0	0	0	0	0	0	0	0	0	0	0	0	0	0	0	0	0	0	0	0	0	0	0	0	0.0136263
58	Veillonella	0.0389	0	0	0.00778	0	0.00391	0	0	0.00388	0.0156	0.00389	0.00389	0.00389	0.0195	0.00389	0.00778	0.0194	0.0039	0.0117	0.0739	0.0156	0.00389	0.0937	0.0312	0.0039	0.0117	0.00778	0.00389	0.00387	0.00389	0.0133743
59	Faecalitalea	0.00778	0	0.00779	0.00778	0.0117	0	0.0195	0	0.00775	0.0506	0	0.00389	0.0934	0.00389	0.0273	0.00389	0.00389	0	0	0.0506	0	0.00779	0	0.0117	0	0.0039	0.0584	0	0.00387	0	0.0128473
60	Pseudobutyrivibrio	0	0	0	0	0	0	0	0.0587	0	0.00389	0.00389	0.00389	0.0117	0	0	0.00389	0.00778	0.0039	0	0	0	0.0389	0	0.00389	0	0.0857	0.0117	0.121	0	0	0.011961
61	Succiniclasticum	0.00778	0	0	0.00389	0	0	0.0272	0	0	0	0	0	0	0	0.191	0.0117	0.035	0	0	0.0506	0	0	0	0.00389	0.0039	0	0	0	0.00387	0	0.0112943
62	Pyramidobacter	0	0.00388	0.00389	0	0	0.0117	0.00389	0	0.00388	0	0.00389	0	0	0.00389	0.0584	0	0	0.0039	0	0.00389	0.0039	0	0.211	0	0.0039	0	0	0	0	0	0.010667
63	Clostridium_XlVb	0.0117	0.00776	0.0117	0.00778	0	0	0	0	0.0116	0.0117	0.00778	0.00389	0.00779	0.00778	0.00389	0.00778	0.00778	0.0468	0.00777	0.00778	0.0156	0	0.0078	0.0117	0.0039	0.0429	0.00778	0.0233	0.00775	0.00777	0.00999267
64	Alistipes	0.00778	0.00776	0.00779	0.0117	0.00389	0.0235	0	0.00391	0	0.00778	0.00389	0.00779	0.0117	0.00778	0	0.0117	0.00389	0.0234	0.00389	0.00778	0.0351	0.00389	0.0741	0	0	0.0039	0.00389	0.00389	0	0	0.00935667
65	Schwartzia	0	0	0	0	0	0.0117	0	0	0	0.00389	0	0	0	0	0	0	0	0	0	0	0	0	0	0	0	0.0234	0.195	0.0195	0	0	0.00844967
66	Anaerostipes	0	0	0.0311	0	0.00389	0.0157	0	0.00783	0.0116	0	0.00389	0	0	0	0.00389	0.00389	0.00389	0.0156	0.00777	0	0	0.0117	0.0039	0.00389	0.0039	0.0156	0.0233	0.0311	0.00387	0.0389	0.00817367
67	Fusicatenibacter	0	0	0	0	0	0	0.00778	0	0.00388	0.0272	0	0	0.00779	0.00389	0	0.0234	0.0156	0.0156	0	0.0233	0	0.0234	0.0039	0.0195	0	0.0039	0.0506	0.00389	0.00387	0	0.00791667
68	Pasteurella	0.0233	0.0116	0	0	0	0	0.0117	0	0.00388	0	0.00389	0	0.0662	0.00389	0	0.00389	0.00389	0.00779	0.0155	0	0.00779	0.00389	0.0351	0.0273	0.0039	0	0	0.00389	0	0	0.00791333
69	Mogibacterium	0.00778	0	0.00389	0.00389	0.00389	0.00783	0.0156	0.00391	0.00775	0.0195	0.00389	0.0273	0.0156	0	0.00779	0.00389	0.0156	0.0039	0.0194	0.0156	0.00779	0	0	0.00389	0	0.0039	0.0195	0.00389	0.00387	0.00389	0.00779133
70	Howardella	0.00389	0.00388	0.00779	0.00778	0.00778	0.0117	0.0195	0.00391	0.0233	0.0272	0.0117	0.00779	0.00389	0	0.00779	0.0195	0.00389	0.0156	0.00389	0.00389	0.0039	0.00389	0.0039	0	0	0.0039	0.00389	0.00389	0	0.00777	0.007527
71	Clostridium_III	0.0117	0.0155	0.0156	0.00778	0	0.00783	0.00389	0.0117	0.00775	0.00778	0.00778	0.00389	0.00389	0.00389	0.00389	0.00389	0.00778	0.0156	0.00389	0	0.00779	0.0156	0.0156	0.00779	0.0039	0.0039	0.00389	0	0.00387	0.00777	0.007138
72	Cellulosilyticum	0	0.00776	0.0156	0.0389	0	0	0	0.00783	0.00775	0.00389	0	0.00389	0.00389	0	0	0.0389	0.0194	0.0039	0.00777	0.00389	0.0039	0.0156	0.0039	0.00389	0	0.0039	0	0	0	0.0155	0.007002
73	Rothia	0.00389	0.0349	0	0.00389	0	0.0157	0.00389	0.0117	0.0233	0.00778	0.00389	0.00389	0.00389	0.00389	0.00389	0.00778	0.00389	0.00779	0.00777	0.0117	0.0039	0.00779	0.0039	0	0.0039	0.0039	0	0.00778	0.0116	0	0.00687333
74	Megamonas	0	0	0	0	0	0	0	0	0	0.00389	0	0	0	0	0.00389	0.0195	0.0233	0	0	0.00389	0	0.136	0.0039	0	0	0	0	0	0	0	0.006479
75	Oligosphaera	0.00389	0	0.00389	0.00389	0.00389	0.0313	0.00389	0	0	0.00389	0.0117	0.00389	0	0	0	0	0.00389	0	0.00389	0	0.0467	0	0.0507	0	0.0039	0.0039	0	0	0.00387	0	0.006236
76	Sharpea	0	0.00388	0	0	0	0	0.00389	0	0	0.16	0	0	0.00389	0	0	0	0	0	0	0.00389	0	0	0	0	0	0	0	0	0	0.00389	0.00598133
77	Helicobacter	0.00389	0.0155	0.00779	0.00389	0.00778	0	0.00389	0.0391	0.0233	0	0.00389	0	0	0	0.00389	0.00389	0.00389	0	0	0.00389	0	0.00779	0.0039	0	0	0	0.00389	0	0.00775	0.0194	0.00557733
78	Anaeroplasma	0.00389	0.00388	0.00389	0.00389	0.0117	0	0	0.0117	0.00388	0	0.0117	0.00779	0	0	0	0.00778	0.035	0	0	0	0.00779	0	0.0273	0	0.00779	0	0	0	0.00387	0.00777	0.00532067
79	Vitreoscilla	0	0	0	0.159	0	0	0	0	0	0	0	0	0	0	0	0	0	0	0	0	0	0	0	0	0	0	0	0	0	0	0.0053
80	Chlamydia	0	0.00388	0.0273	0.00389	0.0156	0	0	0	0.0233	0	0	0	0	0	0	0	0.00389	0	0.0311	0	0	0.00389	0	0.00389	0.0039	0	0	0	0	0.035	0.005188
81	Flavobacterium	0	0	0	0.128	0	0	0	0	0	0	0	0	0	0	0	0	0	0	0	0	0	0	0	0	0	0	0	0	0	0	0.00426667
82	Anaerofilum	0	0.00776	0.00779	0.00389	0.00389	0.0157	0	0.00391	0.00388	0	0.00389	0.00389	0	0.00389	0.00389	0.00389	0.00389	0	0.00389	0	0	0	0	0.00389	0	0.00779	0	0.0117	0.00387	0.0117	0.00376667
83	Acetivibrio	0.00778	0.00388	0.00389	0.00778	0.00389	0.00391	0.00389	0.00391	0	0.00389	0.00389	0	0	0	0	0	0	0	0.00389	0	0.00779	0.00389	0.0156	0.00779	0.0039	0.0117	0	0	0	0.00777	0.00363467
84	Weissella	0	0.0116	0	0.00389	0	0	0.00389	0	0	0.0311	0.00389	0.00389	0.00389	0	0	0	0.00389	0	0.0194	0	0.0039	0.00779	0	0	0.0039	0	0	0	0.00775	0	0.003626
85	Dialister	0	0.0116	0	0	0	0	0	0	0	0.0662	0	0	0	0	0.00389	0	0	0	0	0	0	0	0	0	0	0	0	0	0	0.0233	0.00349967
86	Dietzia	0	0	0	0	0	0.043	0.00389	0	0.00388	0	0	0.00389	0	0	0	0	0	0	0.00389	0	0.0273	0.00389	0	0	0.0039	0	0	0.00389	0.00387	0	0.00338
87	Sutterella	0	0	0	0	0	0	0	0	0	0	0	0	0.0156	0.00389	0.00389	0.00389	0.00389	0	0	0	0.0156	0	0.0156	0.0273	0	0	0	0.00389	0	0.00389	0.003248
88	Bacillus	0	0	0.0156	0.0739	0	0	0	0	0	0	0	0	0	0	0	0	0	0	0	0	0	0	0	0	0	0	0	0	0	0	0.00298333
89	Anaerococcus	0.00389	0.00388	0.035	0.00778	0	0	0	0	0	0.00389	0	0.00389	0	0	0	0	0	0	0	0	0	0.00779	0	0.0117	0	0	0.00389	0	0	0	0.00272367
90	Cloacibacillus	0.00778	0	0	0.00389	0.0117	0	0.00389	0	0	0	0	0.00389	0	0	0.0117	0	0	0	0.00389	0	0	0	0.0195	0	0.0039	0	0	0	0	0.00389	0.00246767
91	Anaerofustis	0.00389	0.00388	0.00779	0	0.00389	0.00391	0.00389	0.00391	0.00388	0.00778	0.00389	0.00779	0	0	0	0.00389	0	0	0.00389	0.00389	0	0.00389	0	0	0.0039	0	0	0	0	0	0.00246533
92	Elusimicrobium	0.00389	0	0	0	0	0	0	0	0	0	0	0	0	0	0	0	0	0	0.00777	0.00389	0.0117	0	0.0273	0.00389	0.00779	0	0	0	0.00387	0	0.00233667
93	Enterococcus	0	0.00388	0.00389	0.0233	0	0	0	0	0	0	0	0	0	0	0	0	0	0	0.00389	0.0311	0	0	0	0	0	0	0	0	0.00387	0	0.002331
94	Mucispirillum	0	0	0	0	0.00389	0	0.00389	0	0	0.00389	0.00778	0.0156	0	0	0	0	0.00389	0	0	0	0	0.00389	0.0078	0.00389	0.0039	0	0.00389	0	0	0.00389	0.00220667
95	Christensenella	0.00389	0.00388	0.00389	0.00389	0.00778	0	0	0	0.00388	0.00389	0	0	0	0	0.00389	0	0.00389	0	0.00389	0.00778	0	0	0.0039	0	0.0039	0	0	0.00389	0	0.00389	0.00220433
96	Actinobacillus	0	0.00388	0	0	0	0	0	0	0	0	0.00778	0	0	0.00389	0	0	0	0	0	0.00389	0.0039	0	0.0234	0.00389	0	0.0039	0	0	0	0	0.00181767
97	Pseudoflavonifractor	0	0	0.00389	0	0.00389	0	0	0	0	0	0	0	0	0	0.0117	0.00389	0.0311	0	0	0	0	0	0	0	0	0	0	0	0	0	0.00181567
98	Intestinimonas	0.00778	0	0.0117	0.00389	0.0156	0	0	0	0	0	0	0	0	0	0	0	0	0	0	0.00389	0	0	0.0039	0	0	0	0	0	0	0.00389	0.00168833
99	Erysipelothrix	0	0	0.0273	0.0194	0	0	0	0	0	0	0.00389	0	0	0	0	0	0	0	0	0	0	0	0	0	0	0	0	0	0	0	0.00168633
100	Wohlfahrtiimonas	0	0	0.0156	0.0311	0	0	0	0	0	0	0	0	0	0	0	0	0	0	0	0	0	0	0	0	0	0	0	0	0	0	0.00155667
101	Butyrivibrio	0	0	0	0	0	0.00391	0	0	0	0	0.00389	0	0	0	0	0	0	0	0	0	0.0039	0.00779	0	0.0195	0	0	0	0	0	0.00389	0.00142933
102	Lysinibacillus	0	0	0.0311	0.0117	0	0	0	0	0	0	0	0	0	0	0	0	0	0	0	0	0	0	0	0	0	0	0	0	0	0	0.00142667
103	Actinomyces	0.00389	0	0	0	0	0	0	0	0.00388	0	0	0.00779	0.00389	0	0	0	0	0.0039	0	0	0	0.00389	0	0	0	0	0.00389	0.00389	0	0.00777	0.00142633
104	Barnesiella	0	0	0	0	0	0	0	0	0	0	0	0.00389	0.0117	0	0.0117	0.00389	0	0	0	0.00389	0	0	0	0	0	0	0.00389	0	0	0	0.00129867
105	Halomonas	0	0.00388	0	0	0	0	0.00389	0	0.00388	0.00389	0.00389	0	0	0	0	0	0	0	0	0.00389	0	0.00389	0	0	0	0	0	0.00389	0	0.00777	0.00129567
106	Chryseobacterium	0	0	0	0.035	0	0	0	0	0	0	0	0	0	0	0	0	0	0	0	0	0	0	0	0	0	0	0	0	0	0	0.00116667
107	Helcococcus	0	0	0.0156	0.0117	0	0	0	0	0	0	0	0	0	0	0	0	0	0	0.00389	0	0	0	0	0	0	0	0	0	0	0	0.00103967
108	Anaerotruncus	0.00389	0	0	0.00389	0.00389	0	0	0	0.00388	0	0	0.00389	0	0.00389	0.00389	0	0	0	0	0	0	0	0.0039	0	0	0	0	0	0	0	0.00103733
109	Arcobacter	0	0	0	0.0272	0	0	0	0	0	0	0	0	0	0	0	0	0	0	0	0	0	0	0	0	0	0	0	0	0	0	0.000906667
110	Cloacibacterium	0	0	0	0.0272	0	0	0	0	0	0	0	0	0	0	0	0	0	0	0	0	0	0	0	0	0	0	0	0	0	0	0.000906667
111	Kocuria	0	0	0	0	0	0.0117	0	0	0.00388	0.00389	0	0	0	0	0	0	0	0	0.00389	0	0	0	0	0	0	0	0	0	0	0	0.000778667
112	Diplorickettsia	0	0	0.00389	0	0	0	0	0	0	0	0	0.00389	0.00389	0	0	0	0	0.0039	0.00389	0.00389	0	0	0	0	0	0	0	0	0	0	0.000778333
113	Methanosphaera	0	0	0	0	0	0	0	0	0	0	0	0	0.00389	0.00389	0.00389	0	0.00389	0	0	0.00778	0	0	0	0	0	0	0	0	0	0	0.000778
114	Proteiniclasticum	0	0	0	0.0233	0	0	0	0	0	0	0	0	0	0	0	0	0	0	0	0	0	0	0	0	0	0	0	0	0	0	0.000776667
115	Globicatella	0	0	0.00779	0.0117	0	0	0	0	0	0	0	0	0	0	0	0	0	0	0	0	0	0	0	0	0	0	0	0	0	0	0.000649667
116	Bilophila	0	0	0	0.00389	0.00389	0	0	0	0	0	0	0	0	0.00389	0	0	0	0	0	0	0	0.00389	0.0039	0	0	0	0	0	0	0	0.000648667
117	Stenotrophomonas	0	0	0	0.0194	0	0	0	0	0	0	0	0	0	0	0	0	0	0	0	0	0	0	0	0	0	0	0	0	0	0	0.000646667
118	Aeromonas	0	0	0	0.0156	0	0	0	0	0	0	0	0	0	0	0	0	0	0	0	0	0	0	0	0	0	0	0	0	0	0	0.00052
119	Porphyromonas	0	0	0	0	0	0	0	0.00391	0	0	0	0.00389	0	0.00389	0	0	0	0	0	0	0	0	0	0	0	0	0	0	0	0.00389	0.000519333
120	Syntrophomonas	0.00389	0.00388	0.00389	0	0	0	0	0	0	0	0	0	0	0	0	0	0	0	0	0	0	0	0.0039	0	0	0	0	0	0	0	0.000518667
121	Neisseria	0.00389	0	0	0	0	0	0.00389	0	0	0	0	0	0.00389	0	0	0.00389	0	0	0	0	0	0	0	0	0	0	0	0	0	0	0.000518667
122	Paenalcaligenes	0	0	0	0.0117	0	0	0	0	0	0	0	0	0	0	0	0	0	0	0	0	0	0	0	0	0	0	0	0	0	0	0.00039
123	Streptomyces	0	0	0	0	0	0	0	0	0	0	0.00389	0	0.00389	0	0	0	0	0.0039	0	0	0	0	0	0	0	0	0	0	0	0	0.000389333
124	Methanomassiliicoccus	0	0	0	0	0	0	0	0	0	0.00389	0	0	0	0	0	0	0	0	0	0	0	0	0.0039	0	0	0	0	0	0	0.00389	0.000389333
125	Moraxella	0	0	0	0	0	0	0.00778	0	0	0	0	0	0.00389	0	0	0	0	0	0	0	0	0	0	0	0	0	0	0	0	0	0.000389
126	Trueperella	0	0	0	0	0	0	0	0	0.00388	0	0	0	0	0	0.00389	0	0	0	0	0	0	0	0.0039	0	0	0	0	0	0	0	0.000389
127	Leucobacter	0	0	0	0.00389	0	0	0	0	0	0	0	0	0	0	0	0	0	0	0	0	0	0	0	0	0	0	0.00389	0	0.00387	0	0.000388333
128	Tissierella	0	0	0	0.00778	0	0	0	0	0	0	0	0	0	0	0	0	0	0	0	0	0	0	0	0	0	0	0	0	0	0	0.000259333
129	Anaerobiospirillum	0	0	0	0	0	0	0	0	0	0	0	0	0	0	0.00389	0	0	0	0	0.00389	0	0	0	0	0	0	0	0	0	0	0.000259333
130	Brachymonas	0	0	0	0.00778	0	0	0	0	0	0	0	0	0	0	0	0	0	0	0	0	0	0	0	0	0	0	0	0	0	0	0.000259333
131	Brachybacterium	0	0	0	0.00389	0	0	0.00389	0	0	0	0	0	0	0	0	0	0	0	0	0	0	0	0	0	0	0	0	0	0	0	0.000259333
132	Lampropedia	0	0	0	0.00778	0	0	0	0	0	0	0	0	0	0	0	0	0	0	0	0	0	0	0	0	0	0	0	0	0	0	0.000259333
133	Odoribacter	0	0	0	0	0.00778	0	0	0	0	0	0	0	0	0	0	0	0	0	0	0	0	0	0	0	0	0	0	0	0	0	0.000259333
134	Anaerorhabdus	0	0	0	0.00778	0	0	0	0	0	0	0	0	0	0	0	0	0	0	0	0	0	0	0	0	0	0	0	0	0	0	0.000259333
135	Aerococcus	0	0.00388	0	0	0	0	0	0	0	0	0	0	0	0	0	0	0.00389	0	0	0	0	0	0	0	0	0	0	0	0	0	0.000259
136	Deinococcus	0	0	0	0	0	0	0	0	0	0	0	0	0	0	0	0	0	0	0	0	0	0	0.0039	0	0	0	0	0	0	0	0.00013
137	Zoogloea	0	0	0	0.00389	0	0	0	0	0	0	0	0	0	0	0	0	0	0	0	0	0	0	0	0	0	0	0	0	0	0	0.000129667
138	Paludibacter	0	0	0	0.00389	0	0	0	0	0	0	0	0	0	0	0	0	0	0	0	0	0	0	0	0	0	0	0	0	0	0	0.000129667
139	Jeotgalicoccus	0	0	0.00389	0	0	0	0	0	0	0	0	0	0	0	0	0	0	0	0	0	0	0	0	0	0	0	0	0	0	0	0.000129667
140	Fusobacterium	0	0	0	0	0	0	0	0	0	0	0	0	0	0	0	0	0	0	0	0	0	0	0	0	0	0	0	0	0	0.00389	0.000129667
141	Peptoniphilus	0	0	0	0	0	0	0	0	0	0	0	0	0	0	0	0	0	0	0	0	0	0	0	0	0	0	0	0	0	0	0
142	Proteiniphilum	0	0	0	0	0	0	0	0	0	0	0	0	0	0	0	0	0	0	0	0	0	0	0	0	0	0	0	0	0	0	0
143	Aquisphaera	0	0	0	0	0	0	0	0	0	0	0	0	0	0	0	0	0	0	0	0	0	0	0	0	0	0	0	0	0	0	0
144	Finegoldia	0	0	0	0	0	0	0	0	0	0	0	0	0	0	0	0	0	0	0	0	0	0	0	0	0	0	0	0	0	0	0
	Top 10 genus	Mean of group
	Genus	C	ATB	SH
	Others	9.05711	10.5799	7.549
	Unassigned	58.07	44.61	56.26
	Prevotella	9.097	18.965	13.629
	Clostridium_sensu_stricto	6.411	5.7853	6.905
	Megasphaera	2.9097	9.06884	1.40969
	Lactobacillus	4.13111	1.8898	3.31054
	Treponema	3.4806	1.3879	3.57565
	Phascolarctobacterium	2.4342	2.7777	2.9626
	Clostridium_XlVa	2.02432	1.9299	3.255
	Ruminococcus	1.8764	0.4363	0.9841
	Olsenella	0.50856	2.56939	0.15942

## Sheet: family
	Group	C	C	C	C	C	C	C	C	C	C	ATB	ATB	ATB	ATB	ATB	ATB	ATB	ATB	ATB	ATB	SH	SH	SH	SH	SH	SH	SH	SH	SH	SH
abundance order of the sum	Family	WK1	WK10	WK2	WK3	WK4	WK5	WK6	WK7	WK8	WK9	K1	K10	K2	K3	K4	K5	K6	K7	K8	K9	JS1	JS10	JS2	JS3	JS4	JS5	JS6	JS7	JS8	JS9	Sum of all samples
1	Unassigned	19.4	18.8	23.6	17.8	14.2	17.7	14.9	17	19.3	22.1	23.8	19.6	17.9	13	17.4	10.1	9.46	11.9	13.1	16	11.3	18.8	23.2	13.6	25.3	11	14.7	13.8	21.4	16.1	16.8753
2	Prevotellaceae	12.8	6.3	16	16	5.75	6.81	14.9	3.36	10.9	8.85	19.1	12.3	25.2	32.7	14	37.8	29.8	20.8	4.67	16.2	32.6	3.19	14.8	23.8	18.2	9.48	18.5	1.54	15.9	14.4	15.555
3	Ruminococcaceae	20.8	12.3	15	16.3	19.2	21.2	11.8	11.3	17	20.3	14.7	13.8	11.5	5.93	5.33	15.1	11.5	15.3	12.3	11.8	14.9	13.3	13.8	8.03	13	27.9	15	23.2	14.7	12.2	14.6163
4	Lachnospiraceae	14	24.6	9.07	11.5	2.26	10.3	10.6	11.3	8.39	13.8	11.5	15.4	7.31	14.9	3.13	7.92	9.14	24.9	10.2	8.23	8.4	23.3	14.6	14.9	11.7	29.2	9.08	36.5	13.3	15.5	13.4977
5	Porphyromonadaceae	9.74	6.86	14.1	6.01	25.2	24.8	8.39	24.5	8.69	10.8	11.1	10	7.25	4.02	0.864	5.84	5.5	8.08	8.25	3.95	12.3	4.79	10.7	6.2	5.29	4.31	18	5.36	5.87	9.34	9.5368
6	Veillonellaceae	1.77	0.686	0.436	0.778	4.06	3.45	18.9	0.0665	1.16	6.99	6.71	13.6	8.06	13.5	31.1	8.85	17.1	2.44	0.218	28.3	4.17	5.37	1.17	7.97	0.187	3.94	7.98	1.12	0.155	0.385	6.68738
7	Clostridiaceae_1	6.16	6.81	3.6	3.26	1.18	7.1	3.14	12.9	17	3	1.39	3.87	3.73	1.76	0.413	2.99	4.54	5.75	28.3	5.11	6.24	14.1	6.08	1.95	4.75	4.83	4.44	10.2	5.26	11.2	6.36843
8	Lactobacillaceae	2.52	12.6	6.5	2.77	0.0701	0.149	4.22	10.5	0.252	1.73	1.03	1.27	0.977	6.96	0.311	1.12	1.07	1.42	2.93	1.81	0.0974	3.84	0.94	17.1	2.7	0.845	0.463	1.67	2.79	2.66	3.11048
9	Spirochaetaceae	4.3	2.07	1.2	12.2	8.62	0.38	1.46	1.19	2.26	1.22	1.85	2.76	0.471	0.716	0.167	0.346	0.735	0.69	5.34	0.864	1.42	0.899	1.71	0.549	12.2	0.0935	0.965	0.07	15.4	2.48	2.82085
10	Acidaminococcaceae	3.04	1.45	4.52	1.58	3.75	1.26	4.07	0.842	2.51	1.42	3.21	1.48	3.12	1.56	3.59	3.74	5.47	2.42	3.15	0.84	2.62	3.85	2.79	2.05	1.69	5.62	2.98	2.56	0.74	4.76	2.75607
11	Coriobacteriaceae	0.658	0.717	1.23	0.564	5.95	2.85	2.45	0.775	3.71	3.63	1.72	1.85	4.57	0.463	20.9	2.04	2.06	1.19	1.6	1.91	0.366	1.67	0.375	0.44	0.444	0.623	2.09	0.965	0.654	2.32	2.35947
12	Peptostreptococcaceae	1.3	3.3	1.46	0.731	0.0778	1.28	1.14	4.85	4.9	0.576	0.669	1.7	1.96	0.475	0.074	0.529	1.05	1.27	6.23	1.06	1.54	3.15	0.878	0.518	1.9	0.448	0.623	1.13	2.04	4.69	1.71829
13	Erysipelotrichaceae	0.903	0.159	0.899	0.432	2.42	0.184	1.04	0.438	0.802	2.49	0.564	1.1	1.89	0.0973	0.666	0.849	0.646	0.62	1.57	1.12	0.16	1.32	0.0898	0.218	0.242	0.374	2.16	0.603	0.248	0.451	0.82517
14	Desulfovibrionaceae	0.572	0.143	0.463	0.42	1.68	1.71	1.93	0.0783	0.45	1.27	0.907	0.0623	1.63	0.249	0.588	0.58	0.393	0.0663	0.0427	0.44	0.538	0.113	2.69	0.347	0.534	0.171	1.2	0	0.275	0.397	0.664653
15	Bacteroidaceae	0.304	0.5	0.471	0.56	2.87	0.0352	0.222	0.317	0.566	0.0662	0.56	0.273	0.148	0.105	0.876	0.234	0.249	0.175	0.61	0.556	0.339	0.179	3.62	0.514	0.947	0.183	0.354	0.0311	0.441	0.237	0.551417
16	Succinivibrionaceae	0.366	0.217	0.167	0.517	2.19	0.0939	0.296	0.0744	1.3	0.198	0.331	0.109	1.44	1.31	0.0584	0.397	0.117	0.39	0.0155	0.156	1.95	0.315	0.269	0.308	0.144	0.0506	0.0623	0.00389	0.0349	0.0272	0.43027
17	Streptococcaceae	0.844	0.334	0.167	0.0933	0.035	0.00783	0.125	0.0117	0.0504	0.693	0.0428	0.0623	0.642	1.42	0.0273	1.28	0.945	1.41	0.0738	0.502	0.23	1.15	0.0195	1.06	0.129	0.101	0.132	0.0934	0.0929	0.00777	0.392733
18	Methanobacteriaceae	0.202	0.574	0.261	0.463	0.101	0.043	0.14	0.309	0.248	0.269	0.362	0.206	0.269	0.0973	0.0195	0.101	0.0467	0.483	0.315	0.346	0.0662	0.226	0.0937	0.0662	0.105	0.53	0.327	0.794	0.0852	0.338	0.24956
19	Eubacteriaceae	0.035	0.0155	0.0311	0.0311	0.00389	0.168	0.0545	0.0157	0.0814	0.0739	0.0272	0.0584	0.545	0.269	0.241	0.0234	0.0389	0.175	0.136	0.366	0.039	0.109	0.297	0.0662	0.0857	0.0467	0.611	0.0973	0.182	0.0117	0.131186
20	Moraxellaceae	0	0	0.0467	3.59	0	0	0.00778	0	0	0	0	0	0.00389	0	0	0	0	0	0	0	0	0	0	0	0	0	0.00389	0	0	0	0.121742
21	Fibrobacteraceae	0.0195	0.101	0.117	0.0389	0.109	0.0235	0.0467	0.0313	0.0853	0.0156	0.198	0.167	0.0467	0.167	0.0234	0.0117	0.0117	0.214	0.19	0.0584	0.195	0.00779	0.0859	0.144	0.179	0.00779	0.0506	0.00389	0.182	1.05	0.119389
22	Planctomycetaceae	0.0389	0.0388	0.0234	0.0622	0.16	0.0626	0.0117	0.0548	0.00388	0.113	0.0623	0.0311	0.00389	0.0156	0	0	0	0	0.0389	0.0195	0.0234	0.035	0.078	0	0.0701	0.0351	0.00389	0.0272	0.0929	1.17	0.075872
23	Flavobacteriaceae	0	0	0.0117	1.68	0	0	0	0	0	0	0	0	0	0	0	0	0	0	0	0	0	0	0	0	0	0	0	0	0	0	0.05639
24	Enterobacteriaceae	0.0272	0.0116	0.0428	0	0.0545	0.00391	0.0311	0.0117	0.0271	0.0156	0.00778	0.00389	0.514	0.0311	0.0273	0.00389	0.0156	0.0195	0.295	0.105	0.0779	0.00389	0.0273	0.0195	0.0351	0.0039	0	0.00389	0.031	0.00777	0.0486273
25	Verrucomicrobiaceae	0.0311	0.946	0.0467	0	0	0	0	0	0	0	0	0	0	0	0	0	0	0	0	0	0	0.00389	0	0	0.0039	0.0039	0	0.00389	0.00387	0	0.034775
26	Comamonadaceae	0	0	0.00389	1.03	0	0	0	0	0	0	0	0	0	0	0	0	0	0	0	0	0	0	0	0	0	0	0	0	0	0	0.034463
27	Pasteurellaceae	0.0272	0.0194	0.00779	0	0	0	0.0584	0.00391	0.0194	0.00778	0.0156	0	0.121	0.0156	0.00779	0.0195	0.0194	0.0234	0.0466	0.121	0.0818	0.00779	0.203	0.0467	0.0156	0.0429	0.00778	0.0428	0.0194	0.0117	0.0337747
28	Campylobacteraceae	0	0.0194	0.00389	0.0311	0	0.0196	0	0	0.0116	0	0	0.00389	0	0	0	0	0	0	0.00389	0.00389	0.0039	0	0.866	0	0.00779	0	0	0	0.00387	0.00389	0.032757
29	Staphylococcaceae	0.0156	0.0892	0.0311	0	0	0.153	0.0272	0.00783	0.031	0.125	0.0272	0.0506	0.0584	0.00778	0.00389	0.00389	0.00389	0.0351	0.148	0.0233	0.0156	0.0662	0	0.0117	0.00779	0.0039	0.0195	0.00389	0	0	0.032352
30	Planococcaceae	0	0	0.121	0.825	0	0	0	0	0	0	0	0	0	0	0	0	0	0	0	0	0	0	0	0	0	0	0	0	0	0	0.0315333
31	Sutterellaceae	0.00389	0	0.00779	0.00389	0.00778	0.00783	0.00778	0	0	0.00389	0.0311	0	0.374	0.07	0.0234	0.0428	0.0117	0	0	0.00389	0.0429	0.00389	0.0195	0.0701	0.0117	0	0.125	0.00389	0.00775	0.00777	0.0297413
32	Peptococcaceae_1	0.0117	0.00776	0.0117	0.00389	0.00389	0.00783	0.0195	0.00783	0.0426	0.0311	0.00778	0.00779	0.0701	0.0156	0.00389	0.0117	0.00778	0.0156	0.0972	0.0233	0.0039	0.0117	0.0273	0.00779	0.0117	0.039	0.0156	0.07	0.0116	0.00777	0.0204967
33	Corynebacteriaceae	0.00778	0.00776	0.0195	0.0933	0.00778	0.0861	0.00389	0.00391	0.0233	0.0156	0.00389	0.0234	0.00779	0.00389	0	0.00389	0.00778	0.00779	0.0389	0.0117	0.0701	0.035	0	0.00779	0.0156	0.0039	0.00778	0.00778	0.0232	0.00389	0.018433
34	Chloroplast	0.0156	0.0271	0.0389	0.00389	0	0	0.0195	0.047	0.0155	0.00389	0.00778	0.0311	0.00389	0.0117	0.00389	0.0117	0.0156	0.0117	0.00389	0.0117	0.0039	0.0311	0.0078	0.00779	0.00779	0.0351	0.0156	0.0545	0.0349	0	0.0160937
35	Oxalobacteraceae	0.0195	0.00388	0	0.0428	0.00389	0.0235	0.0272	0	0.0155	0.0117	0.0545	0.00779	0.0428	0.0311	0.0117	0	0.00389	0.0312	0.00389	0.00389	0.0506	0	0.0078	0	0	0.0429	0.0117	0.00778	0	0.0117	0.015707
36	Synergistaceae	0.00778	0.00388	0.00389	0.00778	0.0117	0.0157	0.00778	0	0.00388	0	0.00389	0.00779	0	0.00389	0.0701	0	0	0.0039	0.00389	0.00389	0.0039	0	0.246	0	0.00779	0	0	0	0	0.00389	0.014044
37	Bifidobacteriaceae	0.00389	0.159	0.00779	0	0.00389	0	0	0	0	0.0311	0.00389	0	0.00389	0	0.00389	0.00389	0	0.0039	0.00389	0	0	0	0	0	0	0	0.00778	0.00389	0	0.171	0.013723
38	Rikenellaceae	0.00778	0.00776	0.00779	0.0117	0.00389	0.0235	0	0.00391	0	0.00778	0.00389	0.00779	0.0117	0.00778	0	0.0117	0.00389	0.0234	0.00389	0.00778	0.0351	0.00389	0.0741	0	0	0.0039	0.00389	0.00389	0	0	0.00935667
39	Clostridiales_Incertae_Sedis_XIII	0.00778	0	0.00389	0.00389	0.00389	0.00783	0.0156	0.00783	0.00775	0.0195	0.00389	0.0273	0.0156	0	0.00779	0.00389	0.0156	0.00779	0.0233	0.0156	0.00779	0	0	0.00389	0	0.0039	0.0195	0.00778	0.00387	0.00389	0.00831133
40	Micrococcaceae	0.00778	0.0388	0	0.00389	0	0.0274	0.00389	0.0117	0.0271	0.0117	0.00389	0.00389	0.00389	0.00389	0.00389	0.00778	0.00389	0.00779	0.0117	0.0117	0.0039	0.00779	0.0039	0.00389	0.0039	0.0039	0	0.00778	0.0116	0	0.008041
41	Oligosphaeraceae	0.00389	0	0.00389	0.00389	0.00389	0.0313	0.00389	0	0	0.00389	0.0117	0.00389	0	0	0	0	0.00389	0	0.00389	0	0.0467	0	0.0507	0	0.0039	0.0039	0	0	0.00387	0	0.006236
42	Clostridiales_Incertae_Sedis_XI	0.00389	0.00388	0.0545	0.0856	0	0	0	0	0	0.00389	0	0.00389	0	0	0	0	0	0	0.00389	0	0	0.00779	0	0.0117	0	0	0.00389	0	0	0	0.00609733
43	Neisseriaceae	0.00389	0	0	0.159	0	0	0.00389	0	0	0	0	0	0.00389	0	0	0.00389	0	0	0	0	0	0	0	0	0	0	0	0	0	0	0.00581867
44	Helicobacteraceae	0.00389	0.0155	0.00779	0.00389	0.00778	0	0.00389	0.0391	0.0233	0	0.00389	0	0	0	0.00389	0.00389	0.00389	0	0	0.00389	0	0.00779	0.0039	0	0	0	0.00389	0	0.00775	0.0194	0.00557733
45	Anaeroplasmataceae	0.00389	0.00388	0.00389	0.00389	0.0117	0	0	0.0117	0.00388	0	0.0117	0.00779	0	0	0	0.00778	0.035	0	0	0	0.00779	0	0.0273	0	0.00779	0	0	0	0.00387	0.00777	0.00532067
46	Chlamydiaceae	0	0.00388	0.0273	0.00389	0.0156	0	0	0	0.0233	0	0	0	0	0	0	0	0.00389	0	0.0311	0	0	0.00389	0	0.00389	0.0039	0	0	0	0	0.035	0.005188
47	Leuconostocaceae	0	0.0116	0	0.00389	0	0	0.00389	0	0	0.0311	0.00389	0.00389	0.00389	0	0	0	0.00389	0	0.0194	0	0.0039	0.00779	0	0	0.0039	0	0	0	0.00775	0	0.003626
48	Dietziaceae	0	0	0	0	0	0.043	0.00389	0	0.00388	0	0	0.00389	0	0	0	0	0	0	0.00389	0	0.0273	0.00389	0	0	0.0039	0	0	0.00389	0.00387	0	0.00338
49	Bacillaceae_1	0	0	0.0156	0.0739	0	0	0	0	0	0	0	0	0	0	0	0	0	0	0	0	0	0	0	0	0	0	0	0	0	0	0.00298333
50	Elusimicrobiaceae	0.00389	0	0	0	0	0	0	0	0	0	0	0	0	0	0	0	0	0	0.00777	0.00389	0.0117	0	0.0273	0.00389	0.00779	0	0	0	0.00387	0	0.00233667
51	Enterococcaceae	0	0.00388	0.00389	0.0233	0	0	0	0	0	0	0	0	0	0	0	0	0	0	0.00389	0.0311	0	0	0	0	0	0	0	0	0.00387	0	0.002331
52	Xanthomonadaceae	0	0	0.0156	0.0506	0	0	0	0	0	0	0	0	0	0	0	0	0	0	0	0	0	0	0	0	0	0	0	0	0	0	0.00220667
53	Deferribacteraceae	0	0	0	0	0.00389	0	0.00389	0	0	0.00389	0.00778	0.0156	0	0	0	0	0.00389	0	0	0	0	0.00389	0.0078	0.00389	0.0039	0	0.00389	0	0	0.00389	0.00220667
54	Christensenellaceae	0.00389	0.00388	0.00389	0.00389	0.00778	0	0	0	0.00388	0.00389	0	0	0	0	0.00389	0	0.00389	0	0.00389	0.00778	0	0	0.0039	0	0.0039	0	0	0.00389	0	0.00389	0.00220433
55	Aerococcaceae	0	0.00388	0.0156	0.0389	0	0	0	0	0	0	0	0	0	0	0	0	0.00389	0	0	0	0	0	0	0	0	0	0	0	0	0	0.00207567
56	Actinomycetaceae	0.00389	0	0	0	0	0	0	0	0.00775	0	0	0.00779	0.00389	0	0.00389	0	0	0.0039	0	0	0	0.00389	0.0039	0	0	0	0.00389	0.00389	0	0.00777	0.001815
57	Peptoniphilaceae	0	0	0.035	0.0194	0	0	0	0	0	0	0	0	0	0	0	0	0	0	0	0	0	0	0	0	0	0	0	0	0	0	0.00181333
58	Halomonadaceae	0	0.00388	0	0	0	0	0.00389	0	0.00388	0.00389	0.00389	0	0	0	0	0	0	0	0	0.00389	0	0.00389	0	0	0	0	0	0.00389	0	0.00777	0.00129567
59	Coxiellaceae	0	0	0.00389	0	0	0	0	0	0	0	0	0.00389	0.00389	0	0	0	0	0.0039	0.00389	0.00389	0	0	0	0	0	0	0	0	0	0	0.000778333
60	Microbacteriaceae	0	0	0	0.00389	0.00389	0	0	0	0.00388	0	0	0	0	0	0	0	0	0	0	0	0	0	0	0	0	0	0.00389	0.00389	0.00387	0	0.000777
61	Alcaligenaceae	0	0	0	0.0194	0	0	0	0	0	0	0	0	0	0	0	0	0	0	0	0	0	0	0	0	0	0	0	0	0	0	0.000646667
62	Aeromonadaceae	0	0	0	0.0156	0	0	0	0	0	0	0	0	0	0	0	0	0	0	0	0	0	0	0	0	0	0	0	0	0	0	0.00052
63	Pseudomonadaceae	0	0	0.00389	0.0117	0	0	0	0	0	0	0	0	0	0	0	0	0	0	0	0	0	0	0	0	0	0	0	0	0	0	0.000519667
64	Syntrophomonadaceae	0.00389	0.00388	0.00389	0	0	0	0	0	0	0	0	0	0	0	0	0	0	0	0	0	0	0	0.0039	0	0	0	0	0	0	0	0.000518667
65	Rhodospirillaceae	0	0	0.00389	0	0	0	0	0	0.00388	0	0	0	0	0	0	0	0	0	0	0	0	0	0.0039	0	0	0	0.00389	0	0	0	0.000518667
66	Streptomycetaceae	0	0	0	0	0	0	0	0	0	0	0.00389	0	0.00389	0	0	0	0	0.0039	0	0	0	0	0	0	0	0	0	0	0	0	0.000389333
67	Methanomassiliicoccaceae	0	0	0	0	0	0	0	0	0	0.00389	0	0	0	0	0	0	0	0	0	0	0	0	0.0039	0	0	0	0	0	0	0.00389	0.000389333
68	Dermabacteraceae	0	0	0	0.00389	0	0	0.00389	0	0	0	0	0	0	0	0	0	0	0	0	0	0	0	0	0	0	0	0	0	0	0	0.000259333
69	Bacillaceae_2	0	0	0	0	0	0.00391	0	0	0	0	0	0	0	0	0	0	0	0	0	0	0	0	0	0	0	0	0	0	0	0	0.000130333
70	Deinococcaceae	0	0	0	0	0	0	0	0	0	0	0	0	0	0	0	0	0	0	0	0	0	0	0.0039	0	0	0	0	0	0	0	0.00013
71	Rhodocyclaceae	0	0	0	0.00389	0	0	0	0	0	0	0	0	0	0	0	0	0	0	0	0	0	0	0	0	0	0	0	0	0	0	0.000129667
72	Cryomorphaceae	0	0	0	0.00389	0	0	0	0	0	0	0	0	0	0	0	0	0	0	0	0	0	0	0	0	0	0	0	0	0	0	0.000129667
73	Chitinophagaceae	0	0	0	0.00389	0	0	0	0	0	0	0	0	0	0	0	0	0	0	0	0	0	0	0	0	0	0	0	0	0	0	0.000129667
74	Fusobacteriaceae	0	0	0	0	0	0	0	0	0	0	0	0	0	0	0	0	0	0	0	0	0	0	0	0	0	0	0	0	0	0.00389	0.000129667
		Top 10	Mean of group
		Family	C	ATB	SH
		Others	9.03204	9.1278	6.36711
		Unassigned	18.48	15.226	16.92
		Prevotellaceae	10.167	21.257	15.241
		Ruminococcaceae	16.52	11.726	15.603
		Lachnospiraceae	11.582	11.263	17.648
		Porphyromonadaceae	13.909	6.4854	8.216
		Veillonellaceae	3.82965	12.9878	3.2447
		Clostridiaceae_1	6.415	5.7853	6.905
		Lactobacillaceae	4.13111	1.8898	3.31054
		Spirochaetaceae	3.49	1.3939	3.57865
		Acidaminococcaceae	2.4442	2.858	2.966

## Sheet: Phylum
	Group	C	C	C	C	C	C	C	C	C	C	ATB	ATB	ATB	ATB	ATB	ATB	ATB	ATB	ATB	ATB	SH	SH	SH	SH	SH	SH	SH	SH	SH	SH
abundance order of the sum
1	Phylum	WK1	WK10	WK2	WK3	WK4	WK5	WK6	WK7	WK8	WK9	K1	K10	K2	K3	K4	K5	K6	K7	K8	K9	JS1	JS10	JS2	JS3	JS4	JS5	JS6	JS7	JS8	JS9	Sum of all samples
2	Firmicutes	63.2	70.6	49.3	46.3	38.2	54.8	60.4	62.3	59.4	66.4	47.9	61.5	45.9	49.9	51.8	46	55.3	62.6	71.7	64.9	42.1	77.8	48.6	57.3	43.4	79.5	48.9	85.5	47.3	60.2	57.3
3	Bacteroidetes	27.2	19.7	43.2	31.3	41.4	37.9	28.8	32	29.5	22.5	44	29.8	41.2	45.3	24.6	47.9	38.4	32.4	15.9	25.7	50.4	9.6	37.4	39.5	39.4	15.7	41.1	8.04	32	27.7	31.9847
4	Unassigned	3.09	4.24	3.45	2.65	1.4	1.47	4.05	2.79	2.47	3.95	2.2	2.99	3.05	1.46	1.55	2.38	2.8	1.68	4.27	5.05	2.28	8.84	6.72	0.974	3.09	2.87	4.9	4.25	3.43	3.82	3.27213
5	Spirochaetes	4.3	2.07	1.2	12.2	8.62	0.38	1.46	1.19	2.26	1.22	1.85	2.76	0.471	0.716	0.167	0.346	0.735	0.69	5.34	0.864	1.42	0.899	1.71	0.549	12.2	0.0935	0.965	0.07	15.4	2.48	2.82085
6	Actinobacteria	0.767	1.02	1.3	0.797	6	3.31	2.55	0.9	4.02	3.86	1.86	2.05	4.68	0.506	21	2.11	2.12	1.36	1.78	1.96	0.526	1.8	0.421	0.487	0.604	0.678	2.15	1.08	0.895	2.59	2.50603
7	Proteobacteria	1.15	0.655	1	6.1	4.02	1.93	2.41	0.262	1.88	1.58	1.45	0.226	4.27	1.77	0.767	1.07	0.564	0.534	0.427	0.918	2.84	0.463	4.33	0.923	0.919	0.534	1.46	0.0934	0.531	0.548	1.52081
8	Euryarchaeota	0.206	0.574	0.265	0.467	0.101	0.043	0.14	0.309	0.248	0.272	0.362	0.206	0.269	0.101	0.0195	0.101	0.0467	0.487	0.315	0.346	0.0701	0.226	0.101	0.0662	0.105	0.53	0.327	0.794	0.0852	0.342	0.250823
9	Fibrobacteres	0.0195	0.101	0.117	0.0389	0.109	0.0235	0.0467	0.0313	0.0853	0.0156	0.198	0.167	0.0467	0.167	0.0234	0.0117	0.0117	0.214	0.19	0.0584	0.195	0.00779	0.0859	0.144	0.179	0.00779	0.0506	0.00389	0.182	1.05	0.119389
10	Planctomycetes	0.0389	0.0388	0.0234	0.0622	0.16	0.0626	0.0117	0.0548	0.00388	0.113	0.0623	0.0311	0.00389	0.0156	0	0	0	0	0.0389	0.0195	0.0234	0.035	0.078	0	0.0701	0.0351	0.00389	0.0272	0.0929	1.17	0.075872
11	Candidatus_Saccharibacteria	0.0117	0.031	0.0273	0.0467	0.0272	0.0157	0.113	0.0431	0.0271	0.0817	0.0817	0.183	0.0779	0.00778	0.00779	0.0156	0.00778	0.0195	0.0311	0.0778	0.0195	0.261	0.0976	0.109	0.0195	0.0039	0.152	0.0545	0.0194	0.0233	0.0564717
12	Verrucomicrobia	0.0311	0.95	0.0467	0	0	0	0	0	0	0	0	0	0	0	0	0	0	0	0	0	0	0.00389	0.0078	0	0.0117	0.0039	0	0.00389	0.00775	0	0.0355577
13	Cyanobacteria/Chloroplast	0.0156	0.0271	0.0389	0.00389	0	0	0.0195	0.047	0.0155	0.00389	0.00778	0.0311	0.00389	0.0117	0.00389	0.0117	0.0156	0.0117	0.00389	0.0117	0.0039	0.0311	0.0078	0.00779	0.00779	0.0351	0.0156	0.0545	0.0349	0	0.0160937
14	Synergistetes	0.00778	0.00388	0.00389	0.00778	0.0117	0.0157	0.00778	0	0.00388	0	0.00389	0.00779	0	0.00389	0.0701	0	0	0.0039	0.00389	0.00389	0.0039	0	0.246	0	0.00779	0	0	0	0	0.00389	0.014044
15	Tenericutes	0.00389	0.00776	0.0117	0.00389	0.0156	0	0	0.0117	0.00388	0	0.0156	0.0234	0	0	0	0.00778	0.035	0.0039	0	0	0.00779	0	0.0273	0	0.00779	0	0	0	0.00387	0.0117	0.00675167
16	Lentisphaerae	0.00389	0	0.00389	0.00389	0.00389	0.0313	0.00389	0	0	0.00389	0.0117	0.00389	0	0	0	0	0.00389	0	0.00389	0	0.0467	0	0.0507	0	0.0039	0.0039	0	0	0.00387	0	0.006236
17	Chlamydiae	0	0.00388	0.0273	0.00389	0.0156	0	0	0	0.0233	0	0	0	0	0	0	0	0.00389	0	0.0311	0	0	0.00389	0	0.00389	0.0039	0	0	0	0	0.035	0.005188
18	Elusimicrobia	0.00389	0	0	0	0	0	0	0	0	0	0	0	0	0	0	0	0	0	0.00777	0.00389	0.0117	0	0.0273	0.00389	0.00779	0	0	0	0.00387	0	0.00233667
19	Deferribacteres	0	0	0	0	0.00389	0	0.00389	0	0	0.00389	0.00778	0.0156	0	0	0	0	0.00389	0	0	0	0	0.00389	0.0078	0.00389	0.0039	0	0.00389	0	0	0.00389	0.00220667
20	Deinococcus-Thermus	0	0	0	0	0	0	0	0	0	0	0	0	0	0	0	0	0	0	0	0	0	0	0.0039	0	0	0	0	0	0	0	0.00013
21	Fusobacteria	0	0	0	0	0	0	0	0	0	0	0	0	0	0	0	0	0	0	0	0	0	0	0	0	0	0	0	0	0	0.00389	0.000129667
		Top 10	Mean of group
		Phylum	C	ATB	SH
	1	Others	0.142242	0.048666	0.087934
	2	Firmicutes	57.09	55.75	59.06
	3	Bacteroidetes	31.35	34.52	30.084
	4	Spirochaetes	3.49	1.3939	3.57865
	5	Actinobacteria	2.4524	3.9426	1.1231
	6	Proteobacteria	2.0987	1.1996	1.26414
	7	Euryarchaeota	0.2625	0.22532	0.26465
	8	Fibrobacteres	0.05878	0.10879	0.190597
	9	Planctomycetes	0.056928	0.017129	0.153559
	10	Candidatus_Saccharibacteria	0.04245	0.050995	0.07597
	11	Unassigned	2.956	2.743	4.1174
