# Supplementary material for: Impact of Phellinus gilvus mycelia on growth, immunity and fecal microbiota in weaned piglets
Source: PeerJ. 2020 Apr 28;8:e9067. doi: 10.7717/peerj.9067 (PMC7194088; doi:10.7717/peerj.9067)
Supplement: File S9 [file peerj-08-9067-s009.xlsx]

## Sheet: Sheet1
		Genus
group	sample ID	Faecalibacterium	Megasphaera	Prevotella	Alloprevotella	Unassigned	Others
C	WK1	0.0584	0.728	11.7	0.198	54.6	32.7156
C	WK10	0.0427	0.275	5.7	0.0233	64.2	29.759
C	WK2	0.237	0.0701	13.4	0.0623	60.1	26.1306
C	WK3	0.0272	0.548	14.6	0.0272	41.7	43.0976
C	WK4	0.0817	3.59	4.07	0.00389	59.7	32.5544
C	WK5	0.0704	2.55	6.42	0.0196	70.1	20.84
C	WK6	0.179	15.2	13.6	0.0272	45.7	25.2938
C	WK7	0.0313	0.00391	3	0.0235	68	28.9413
C	WK8	0.0737	0.202	10.4	0.0659	57.1	32.1584
C	WK9	0.109	5.93	8.08	0.0778	59.5	26.3032
ATB	K1	0.175	6.49	15.9	0.0506	61.1	16.2844
ATB	K10	0.179	13.1	10.6	0.0311	58.5	17.5899
ATB	K2	0.335	4.34	22.7	0.00779	46.5	26.1172
ATB	K3	0.202	3.63	30.8	0.035	39.8	25.533
ATB	K4	0.0701	17.3	13.2	0.0117	27.7	41.7182
ATB	K5	0.362	5.96	35.4	0.035	35.9	22.343
ATB	K6	0.331	14.2	28.1	0.0311	33.7	23.6379
ATB	K7	0.413	0.214	16.8	0.0039	54.3	28.2691
ATB	K8	0.272	0.0544	4.45	0.0155	47	48.2081
ATB	K9	0.304	25.4	11.7	0.00389	41.6	20.9921
SH	KJS1	0.152	0.175	27.1	0.53	53.6	18.443
SH	KJS10	0.0817	4.23	2.94	0.035	57.5	35.2133
SH	KJS2	0.0663	0.0156	12.2	0.308	56.6	30.8101
SH	KJS3	0.292	5.63	21.9	0.0545	40.7	31.4235
SH	KJS4	0.0117	0.0312	17.1	0.0468	51.7	31.1103
SH	KJS5	0.117	0.0117	8.12	0.405	66.8	24.5463
SH	KJS6	0.0973	3.65	17.8	0.163	52.6	25.6897
SH	KJS7	0.0623	0.00389	1.13	0.132	74.2	24.4718
SH	KJS8	0.0116	0.0465	15.1	0.0426	50.9	33.8993
SH	KJS9	0.0583	0.303	12.9	0.07	58	28.6687
